# Supplementary material for: Identification and characterisation of hypomethylated DNA loci controlling quantitative resistance in Arabidopsis
Source: eLife. 2019 Jan 4;8:e40655. doi: 10.7554/eLife.40655 (PMC6342528; doi:10.7554/eLife.40655)
Supplement: Figure 1—figure supplement 2—source data 1. [file elife-40655-fig1-figsupp2-data1.xlsx]

## Sheet: Figure 1-figure supplement 2
Figure 1-figure supplement 2: Average green leaf area (GLA) of the 123 epiRILs , the ddm1-2 mutant (F4) and six Wt lines (Col-0; 600-604 ).
Listed are GLAs of each replicate plant per line (mm2)
Line	GLA (mm2)
F4 Col-0	32.0825
	33.9667
	26.5505
	23.5778
	30.167
	36.2328
	24.1954
	44.8004
	34.9035
	29.4133
	24.1168
	54.0745
	31.2399
	38.6299
	52.1119
	22.3217
F4 ddm1-2	26.7348
	23.1605
	41.6664
	39.9249
	22.0157
	26.3478
	43.3218
	50.191
	39.7099
	25.7889
	19.1723
	36.9364
	26.1113
	36.0872
	49.2127
600	31.2206
	38.1841
	28.3614
	36.839
	31.7816
	32.8039
	54.1863
	47.3996
	33.2881
	39.3677
	25.5022
	40.7896
	47.2074
	36.1473
	35.0943
601	40.3396
	29.6378
	33.2005
	22.6789
	32.8678
	41.1298
	22.1383
	46.8341
	31.6964
	28.2031
	22.5126
	21.1956
602	29.7531
	58.0163
	35.2261
	30.4419
	40.6391
	39.5835
	34.0731
	30.2098
	38.6251
	38.2283
	37.4796
	34.4998
	43.7612
	42.9077
	48.0362
	36.8882
	39.9204
603	42.2502
	32.1889
	20.1515
	26.1304
	30.7629
	30.5241
	23.9879
	29.2067
	36.3799
	36.3437
	23.8648
604	26.0221
	45.0108
	34.8996
	41.2207
	35.58
	24.0189
	37.9457
	38.8805
	45.634
	27.1985
	28.9346
	32.6802
	38.9441
	39.3701
8	23.645
	13.209
	32.9015
	17.3803
	23.1842
	18.1771
	25.3635
	8.99089
	31.8626
	21.8875
	30.3784
11	40.247
	32.4562
	49.9093
	47.2312
	23.5471
	46.7291
	38.5123
	59.4955
	41.7305
	38.071
	52.7699
14	25.7318
	34.7437
	37.5291
	36.4257
	32.3981
	40.4302
	50.8386
	26.0173
	36.1634
	38.4627
	45.4994
	54.002
18	40.9551
	34.2162
	20.4123
	35.6944
	38.9842
	43.1797
	16.0574
	39.832
	22.6079
	35.1075
	39.8682
	37.506
20	28.8433
	37.9389
	21.663
	46.0374
	36.3967
	46.6041
	15.7666
	42.5226
	30.8805
	34.8042
24	44.5948
	44.3463
	33.3676
	27.7831
	29.5009
	26.197
	33.0752
	24.0919
	22.9955
	27.9293
	33.3749
36	29.1932
	29.6005
	34.2529
	38.9981
	35.7822
	33.2452
	29.4648
	39.6413
	42.0925
	54.4201
	33.8741
	34.8746
46	29.3192
	31.0577
	41.9874
	24.3738
	34.4239
	37.0559
	38.3857
	29.9841
	39.4108
	31.0369
	33.7035
	23.7227
	38.1018
	33.191
52	41.1566
	30.3227
	38.0464
	34.1708
	34.1639
	30.8675
	31.3295
	47.8873
	36.6258
	36.281
	43.591
53	47.2164
	24.8245
	42.1295
	42.3513
	38.8931
	37.0149
	41.7137
	43.6958
	46.3293
	38.9277
	28.553
54	49.6345
	37.8066
	36.8678
	36.1962
	34.1473
	45.0843
	31.9544
	44.584
	41.2673
	35.6343
	28.528
	42.5625
	37.1077
	33.2496
55	49.7441
	42.1581
	31.8653
	44.6388
	28.2539
	32.3107
	28.1443
	42.7612
	26.9656
	37.183
	24.0395
60	41.1121
	39.6871
	50.5483
	32.867
	33.6894
	27.0252
	38.886
	26.0398
	39.8998
	26.4155
	28.351
	35.2845
62	34.9397
	39.3605
	32.9252
	45.7609
	42.2145
	25.0489
	45.579
	38.0875
	48.8667
	33.2749
	39.4515
	33.254
	28.6163
	34.7859
64	29.5588
	26.1655
	23.4495
	28.3383
	25.9962
	22.9486
	28.0843
	33.4952
	39.9784
	24.1338
	31.1319
	31.1743
	17.2555
69	35.8223
	22.3106
	41.4163
	30.3157
	29.9223
	12.6303
	28.0431
	30.0097
	41.2707
	38.7213
	42.2321
	37.2572
	15.3108
70	54.3451
	31.5421
	29.7943
	18.8631
	32.4827
	23.8103
	45.5024
	16.7746
	28.202
	14.5305
	27.5058
	50.1089
	28.7575
71	44.2275
	31.9927
	33.2646
	23.8771
	39.4579
	41.6837
	38.1571
	27.8518
	41.9439
	43.4037
	31.9638
73	29.5159
	32.185
	33.691
	36.4271
	41.3328
	47.722
92	42.4196
	41.9886
	37.5296
	46.1429
	29.8453
	41.461
	24.829
	38.3768
	27.274
	43.2074
	15.7104
93	19.0194
	34.3799
	32.4796
	20.9434
	11.9147
	33.3785
	13.5312
	40.838
	45.4903
	36.6982
	32.6767
	27.7011
94	51.278
	45.0851
	30.1305
	26.5063
	35.7477
	40.8334
	39.7336
	38.464
	47.2921
	44.716
	43.3431
	52.9166
95	43.4892
	24.6941
	45.2422
	28.0981
	42.5364
	47.6134
	50.7774
	54.0942
	42.8564
	21.5664
	35.1172
	26.9416
	36.6592
98	24.3686
	13.6207
	10.9717
	26.3608
	15.7429
	14.5952
	9.59298
	13.4475
	17.8145
	17.9156
	17.6485
99	25.4068
	31.1528
	30.388
	14.4495
	37.3184
	43.775
	40.9596
	45.5753
	30.8618
101	46.9139
	40.3937
	23.6645
	32.3967
	31.2056
	51.3038
	45.0218
	37.2494
	33.6966
	49.7861
	29.2251
	46.7778
	41.0948
108	42.3039
	24.3367
	44.408
	27.8388
	42.5678
	46.8189
	49.3082
	53.6306
	41.719
	21.4622
	34.4722
	26.6548
	35.5849
112	52.6782
	61.6901
	31.0795
	39.9351
	36.4078
	42.8031
	30.4882
	53.2831
	30.8077
	36.102
	47.2072
	38.8885
	37.604
114	39.3586
	13.024
	39.032
	9.52473
	42.8713
	21.8289
	14.5637
	21.3756
	12.3508
	11.6043
	29.5273
	42.8979
	16.4233
118	24.2359
	39.5052
	39.512
	28.6239
	41.6787
	14.8536
	17.8857
	34.4086
	41.1472
	39.0555
	36.1937
122	24.7557
	23.7645
	18.0516
	36.9967
	33.1359
	40.2053
	17.8103
	34.9815
	41.5161
	25.0623
	26.5818
137	28.0808
	29.8391
	18.1646
	13.9241
	28.9858
	14.8097
	22.5668
	26.4195
	18.5072
	27.318
	25.1525
	26.4583
144	44.7823
	50.7663
	40.55
	35.4839
	41.7061
	28.1545
	52.2868
	46.2888
	42.505
	35.617
	41.2086
147	64.0861
	33.344
	39.0066
	49.813
	27.1556
	61.3247
	29.6309
	48.6418
	46.2397
	35.9723
	66.0691
	41.4753
148	38.3834
	47.5607
	35.7336
	26.8212
	30.0979
	42.539
	38.1378
	20.2678
	45.693
	57.8562
	25.9228
150	49.6446
	44.9696
	54.6743
	40.401
	30.7104
	37.3789
	47.4738
	50.7584
	45.4803
	33.2714
	45.6861
	16.0043
	39.8973
	44.9767
	28.5112
159	44.12
	52.5158
	56.2943
	38.7241
	30.4894
	47.1199
	44.5495
	35.2343
	38.449
	43.5093
	31.6773
164	52.41
	46.9377
	47.2379
	50.943
	31.0461
	52.6215
	49.5032
	53.7132
	41.2538
	53.7678
	17.8908
	24.523
	48.8004
166	46.902
	34.6286
	38.5005
	47.4937
	15.6997
	49.0863
	33.5473
	39.1288
	46.5732
	29.4416
	55.0331
	52.3008
169	40.039
	32.6636
	31.8872
	23.1779
	17.3693
	36.743
	15.8024
	42.8692
	25.8669
	36.8277
	38.2816
170	65.7526
	52.845
	38.9716
	41.2253
	45.0741
	36.8057
	53.606
	26.8762
	44.4522
	26.8835
	22.6395
172	35.9762
	28.3721
	29.7813
	31.7277
	30.7789
	37.6086
	29.3558
	30.765
	39.2968
	40.2456
	38.9829
	39.7084
	24.8631
	26.9909
183	50.2359
	38.6013
	29.7204
	38.1012
	35.5658
	35.6926
	31.0655
	61.7367
	54.4404
	45.475
	39.552
	52.6586
	63.7157
	34.1362
	51.088
	48.2287
193	27.29
	30.4733
	41.0819
	25.9853
	20.6024
	34.6129
	40.6378
	43.8416
	31.1085
	43.1926
	48.4047
	21.914
	39.0052
	39.8523
	37.1608
	41.1365
195	33.438
	38.556
	35.8598
	39.1391
	30.0695
	37.9111
	57.7791
	32.9235
	32.8755
	27.7987
	25.3495
	34.8582
	26.9
	38.4668
	34.3779
	29.6305
202	25.8798
	45.0687
	20.7459
	33.0616
	39.6473
	41.7373
	47.1237
	33.4544
	47.2148
	36.2247
	60.9473
	31.3994
	40.6853
	49.1015
	49.1926
208	25.0625
	41.8705
	23.1247
	27.2791
	39.7287
	37.7297
	31.889
	36.0231
	41.1838
	41.7481
	33.8133
	31.2703
	43.9579
	33.2557
	36.6214
	19.9561
	25.1917
215	33.9001
	15.6405
	45.5987
	28.455
	27.4728
	52.173
	39.6592
	34.2341
	54.8655
	33.0516
	28.7088
	25.3349
	35.577
	25.3415
	34.7285
	37.5814
216	36.034
	41.0614
	27.7899
	32.2933
	37.5396
	17.1117
	59.3205
	25.1502
	22.61
	32.4923
	26.7088
	28.2608
	29.1429
	18.3586
	33.9846
	33.9381
218	34.2318
	28.2196
	31.2659
	35.4101
	44.2744
	67.7472
	52.5227
	48.5994
	43.404
	53.8885
	57.2159
	33.6493
	42.0382
	50.3133
222	34.2606
	31.6629
	55.7912
	54.6182
	44.3533
	38.6807
	52.2127
	41.5369
	34.9697
	37.6138
	35.5065
	34.9167
	15.2218
	28.6477
	37.4216
	20.0859
225	31.1703
	25.4711
	54.3846
	43.3972
	57.0792
	32.073
	54.7484
	37.2197
	44.6367
	51.7438
	46.3074
	40.6082
	50.1001
229	50.6712
	53.8648
	38.7359
	58.5402
	50.6848
	56.5104
	45.7997
	43.851
	50.157
	31.2932
	33.3365
	29.9805
	73.182
	54.9001
	32.3148
	57.8365
	57.4441
232	12.2347
	18.3789
	37.0596
	20.5052
	15.3604
	10.5243
	10.0815
	13.8445
	6.73445
	24.892
	25.7036
	34.3229
238	42.0363
	44.1723
	33.8175
	44.2469
	28.4469
	27.5246
	32.8478
	41.2971
	26.4532
	35.289
	33.4988
	38.917
	49.5837
	38.5372
	45.6438
	24.5274
244	24.5389
	33.213
	35.3922
	45.5215
	46.6146
	27.3498
	47.6936
	28.4429
	52.7334
	39.9067
	46.6146
	32.0276
	31.0196
	40.4178
	56.5878
	41.1418
	49.7095
	38.3593
252	29.8942
	39.7414
	44.8589
	36.654
	37.5563
	35.0892
	53.9448
	39.255
	42.6667
	31.5224
	37.4364
	32.7771
	38.7898
	34.0459
	48.1577
257	25.9763
	59.5179
	46.0596
	49.6126
	37.2525
	49.9141
	28.79
	20.0188
	38.9106
	30.1896
	40.3318
	42.3057
	24.6269
	29.2924
258	29.7437
	29.0976
	26.2652
	33.425
	27.1592
	39.3152
	31.8999
	48.4885
	40.2242
	39.8486
	45.0701
	23.1398
	30.8331
	35.8141
	50.4043
	22.9069
	48.1879
260	37.2532
	46.2655
	20.1913
	35.568
	31.2499
	39.0812
	48.8158
	33.0028
	34.0259
	43.0006
	33.5895
	22.6588
	23.6142
	45.265
	29.0382
	44.6857
	34.718
	43.6702
262	24.7833
	36.2814
	36.4217
	16.9776
	28.2541
	26.4596
	28.9483
	33.453
	30.0413
	39.0138
	24.5839
	30.0339
275	37.5369
	38.5404
	30.4624
	35.9744
	39.25
	29.5665
	29.2009
	34.2971
	33.4298
	32.4192
	44.1813
276	42.6487
	29.2479
	44.3417
	36.3644
	17.5043
	44.227
	42.9787
	26.5218
	38
	29.8649
	30.8046
	24.3697
	33.337
277	18.6413
	40.3998
	24.5829
	27.0602
	39.1135
	29.3947
	34.3357
	27.666
	32.8521
	32.7636
	35.5268
	35.1116
297	43.069
	43.1778
	21.2659
	48.0471
	38.4513
	29.5356
	45.3132
	33.0107
	24.3126
	43.8375
	39.7843
	36.5267
	42.1169
305	45.7207
	29.0235
	25.6479
	36.1854
	29.1836
	31.5848
	27.2835
	34.9047
	27.5132
	21.2491
	34.3827
	35.3502
315	27.8064
	37.8596
	35.5066
	28.6723
	30.1661
	31.2104
	32.5719
	38.6065
	39.0295
	14.2502
	34.1979
	40.5233
	37.3771
323	32.9668
	43.3634
	34.2949
	26.906
	23.8398
	33.5137
	33.4225
	25.0051
	33.5332
	36.9314
	26.4698
326	22.94
	35.1018
	38.3087
	30.1426
	36.8604
	25.1189
	36.1492
	26.2827
	48.6731
	36.7246
	24.7891
	29.1405
333	17.4422
	25.4151
	28.9822
	28.4726
	13.6493
	34.678
	31.8656
	21.5512
340	35.2332
	36.1472
	18.8975
	28.9319
	36.8745
	47.1149
	23.3837
	40.9037
	47.8294
	39.713
344	42.326
	48.3226
	31.1629
	36.5929
	48.7642
	32.1514
	44.5929
	41.6802
	33.2585
	23.2948
	31.7824
	31.5188
350	37.1913
	36.8492
	35.1968
	24.6823
	38.863
	32.2277
	37.2494
	18.3052
	33.2476
	31.266
	37.1719
356	23.2674
	26.8554
	27.6894
	22.8536
	26.6356
	35.1887
	36.4106
	27.6958
	23.3191
	25.3685
	25.821
	26.8425
	28.7367
	22.2459
	33.5078
	32.7902
361	21.8223
	41.1369
	32.6408
	34.4605
	26.5136
	26.2424
	35.3934
	27.9694
	31.5888
	25.7461
	22.5899
	30.98
	39.165
362	26.6381
	39.8996
	20.9391
	26.2586
	44.1348
	38.4765
	24.5103
	34.9189
	23.8666
	24.036
	29.9111
	8.53829
363	27.7307
	29.5579
	30.2565
	33.9311
	33.0309
	28.96
	39.9703
	40.8302
366	34.6333
	37.2049
	31.8671
	43.7729
	33.7645
	21.393
	36.5724
	23.8047
	41.6531
	35.0364
	33.2293
	35.1337
	41.5141
368	24.8466
	16.5552
	25.4643
	24.1053
	20.5019
	33.6871
	29.1364
	36.2884
	23.9406
	33.2272
	35.6432
	32.28
	14.4618
	27.9009
	27.9833
371	32.3191
	33.8886
	31.4331
	35.8419
	37.3905
	41.1644
	31.7471
	42.3573
	25.8315
	32.7516
	32.2912
	22.8389
375	33.3946
	34.2535
	34.7139
	22.1325
	34.8857
	31.8005
	23.1357
	31.2026
	30.7766
	27.3616
	15.8178
	29.1069
	21.3561
	34.5833
391	40.9342
	28.6254
	46.4151
	31.2729
	21.2667
	30.9146
	34.0864
	16.5887
	30.5696
	30.689
	19.5149
	38.8706
	36.7207
	34.4845
	30.5961
393	34.0446
	30.8815
	43.4344
	29.6083
	29.9797
	34.6878
	43.3615
	36.6639
	42.6983
	43.3482
	49.1903
	49.4555
	39.1374
	30.6229
394	21.835
	18.9694
	26.0976
	22.2136
	24.6288
	27.6838
	14.3413
	27.6903
	27.6642
	17.0959
	21.5674
	28.1146
	26.1041
400	22.7031
	18.9548
	26.15
	41.7835
	39.9815
	44.32
	41.5072
	43.0078
	29.3834
	32.7487
	41.5888
	28.2093
	43.6545
	38.2801
408	39.1365
	34.1413
	41.0915
	46.0232
	33.5828
	40.7868
	42.7608
	39.3079
	28.9303
	36.7818
	31.5263
	31.1899
	46.5881
410	25.6209
	38.4598
	46.9896
	39.8309
	40.1531
	13.4075
	29.949
	44.6644
	38.5609
	38.0681
	39.6224
	50.4394
	36.8044
	36.7791
425	33.618
	31.9263
	45.5143
	42.6005
	47.2241
	38.1092
	45.3819
	52.498
	46.1284
	28.6752
	29.482
	31.6433
	41.3181
432	29.4436
	33.0628
	28.3045
	30.7663
	40.8646
	26.2836
	33.7486
	25.7386
	46.1556
	33.1424
	27.588
	33.9691
	34.5264
434	37.2563
	29.8541
	29.0595
	41.6356
	20.9582
	33.5104
	28.2051
	44.1628
	43.9059
	30.4635
	35.9659
	31.7599
	36.3602
	35.7329
	27.0819
	30.1647
	26.6996
437	52.0358
	62.443
	43.9328
	31.5132
	41.974
	33.3529
	20.3142
	44.7544
	41.0809
	27.7683
	47.9099
	37.5027
	25.9346
	30.6261
	38.7589
438	32.9624
	32.7666
	28.6486
	24.3164
	23.4292
	46.0078
	31.8977
	31.8549
	37.062
	39.7972
	33.0664
	33.5559
439	22.3501
	40.4047
	41.0991
	32.9014
	46.0706
	26.1479
	45.831
	41.6461
	30.8428
	44.7924
	44.0366
	44.5282
	39.4154
	35.2919
454	20.1209
	27.7357
	24.3507
	23.5591
	29.9392
	30.7367
	20.0146
	36.3606
	39.9346
	41.1988
	25.798
	21.2315
	25.3845
	39.4679
	25.6031
	29.6674
	19.8433
458	36.6447
	46.9653
	51.2366
	58.6736
	46.713
	54.1141
	56.6912
	57.6344
	35.0708
	48.305
	46.4067
	63.2813
466	27.0675
	30.578
	29.1626
	22.1728
	32.617
	34.2506
	39.5818
	23.7691
	19.0552
	20.4955
	42.8616
	33.4026
	25.5586
	25.2967
	30.4222
	32.9225
	39.0207
467	39.65
	41.3693
	43.1383
	51.3625
	34.79
	45.2983
	38.6631
	42.7659
	37.8996
	36.9003
	37.2852
	42.9645
	40.8293
471	36.1635
	36.2519
	36.4287
	25.6182
	35.3868
	45.7175
	20.5602
	46.0648
	34.0102
	40.6658
	46.3679
473	30.9943
	46.0615
	43.8121
	35.1247
	32.8106
	37.2448
	35.9844
	40.871
	37.8589
	32.2806
	33.6768
	30.0053
	42.7197
	38.641
	49.7847
477	27.9068
	34.1519
	38.1367
	45.4858
	35.4584
	31.8982
	33.9167
	40.4427
	34.8313
	43.9637
	35.7981
	41.9452
480	31.9042
	51.8961
	35.784
	43.7367
	24.7515
	52.516
	40.1303
	44.2233
	24.8315
	45.3699
	43.7034
	41.5702
	36.9305
488	20.8487
	44.5439
	32.3266
	26.6138
	44.2887
	32.8043
	21.6274
	28.4461
	43.2417
	40.297
	31.273
	50.9373
492	51.7995
	48.7949
	49.7748
	21.7335
	31.0784
	37.1461
	38.9048
	42.1691
	50.599
	44.687
	32.7917
	48.9961
	45.6085
493	21.482
	34.7279
	38.0678
	44.1152
	36.4674
	28.8197
	43.8621
	37.0304
	35.8412
	43.3814
	41.8443
	22.6142
	28.7375
	41.5723
494	36.4618
	35.6554
	40.6924
	40.8102
	25.8483
	36.1951
	44.7554
	48.8867
	32.6841
	30.2029
	25.3583
	40.1527
	39.8797
	27.1076
495	48.5087
	54.6004
	46.7866
	51.7988
	41.3568
	43.5737
	36.9422
	46.0091
	54.9474
	44.062
	49.1513
	47.9818
	42.9889
	39.9495
497	34.0291
	49.2721
	30.7566
	35.4931
	23.8118
	36.3728
	50.4901
	38.4765
	39.6084
	40.5188
	38.3966
	31.87
	27.7486
	33.6908
500	29.2216
	22.0456
	36.4928
	23.8545
	38.3433
	22.2836
	44.7695
	36.3143
	30.8698
	39.1228
	43.758
	39.093
	45.6621
	26.6392
	33.4879
503	32.9479
	42.6431
	27.6378
	25.4152
	38.4683
	45.5084
	37.2789
	37.9096
	32.2451
	34.9062
	41.7661
	34.2634
	57.8466
	38.3061
	31.9868
506	27.722
	36.0409
	28.9746
	46.6051
	31.7869
	27.9229
	39.456
	24.3719
	26.8535
	21.985
	26.6526
	28.0588
	23.9938
	21.5596
508	27.9409
	37.5484
	40.0232
	45.9943
	32.3945
	29.441
	42.749
	43.3093
	30.1181
	38.6457
	19.0865
	37.8169
	28.046
	35.3304
523	40.9307
	35.9956
	32.8866
	43.5265
	48.205
	38.1916
	39.0867
	32.8687
	47.9663
	44.2008
	32.1048
	40.1788
	43.7891
	43.807
538	29.4121
	48.5979
	40.5976
	27.6841
	37.1171
	51.6479
	33.938
	35.1863
	26.8478
	33.5444
	35.8996
	32.9787
	15.2994
539	32.0947
	51.9765
	21.7653
	23.4427
	39.7637
	37.2741
	25.6616
	40.9585
	38.5218
	33.5779
	41.1292
	32.7715
556	24.3019
	30.8225
	45.4656
	44.0662
	37.6468
	42.7085
	36.7119
	36.4678
	28.655
	48.8718
	34.3836
	22.0152
	42.6787
	38.1828
558	40.7123
	28.5395
	45.4627
	42.636
	25.5024
	37.9351
	30.525
	29.758
	34.762
	33.494
	39.0485
	35.6774
	37.0568
	35.5723
559	42.503
	41.9417
	43.9369
	39.6902
	30.477
	24.0155
	50.0384
	44.4067
	22.6793
	28.1462
	33.8755
	39.0191
	36.8469
	37.451
	30.5319
	25.3517
561	37.4996
	49.6604
	46.7029
	31.5908
	37.8365
	33.369
	31.1977
	38.8536
	39.3964
	36.4389
	27.117
	45.2054
567	34.6156
	38.8574
	31.897
	34.23
	28.7671
	41.004
	26.1192
	36.743
	43.247
	31.4407
	44.0247
	35.1169
	46.0813
	29.9818
	23.7412
570	33.6618
	36.8275
	32.209
	28.9544
	42.1121
	41.3191
	48.7607
	37.2842
	31.7141
	30.5024
	34.5816
	40.875
	22.9085
572	44.4477
	36.2209
	37.6027
	25.3585
	43.6161
	33.3358
	36.2593
	36.7775
	40.9292
	23.1067
	28.749
	26.0622
	34.4297
	27.4568
573	39.9735
	30.4021
	40.4414
	21.2932
	25.8281
	25.9061
	26.948
	37.9177
	34.0011
	22.608
	36.5917
	27.9229
	20.5021
	30.0846
	36.7366
	26.7195
579	14.4575
	24.4256
	22.7787
	28.0563
	29.1868
	25.2245
	22.9581
	23.8929
	39.9484
	33.7795
	37.5243
	22.4744
	19.5013
	37.2851
	33.7034
	34.9589
	23.5125
	23.4418
