# Supplementary material for: Identification and characterisation of hypomethylated DNA loci controlling quantitative resistance in Arabidopsis
Source: eLife. 2019 Jan 4;8:e40655. doi: 10.7554/eLife.40655 (PMC6342528; doi:10.7554/eLife.40655)
Supplement: Figure 1—figure supplement 3—source data 1. [file elife-40655-fig1-figsupp3-data1.xlsx]

## Sheet: Figure 1-figure supplement 3a
Figure 1-figure supplement 3a: Confirmation of resistance of epiRILs to Hpa. Listed are numbers of trypan-blue stained leaves in the four different Hpa colonisation classes at 6dpi.
Line	Class	F	RI
Col-0 (#602)					Class: Hpa colonisation classes (see Supplementary Figure 1 for details)
	I	0	1.83333		F: number of leaves scored in each class
	II	9			RI: resistance index (see Methods for details)
	III	87
	IV	30
	tot	126
epiRIL #71
	I	5	2.42268
	II	34
	III	55
	IV	3
	tot	97
epiRIL #92
	I	4	2.45714
	II	57
	III	78
	IV	1
	tot	140
epiRIL #93
	I	5	2.5625
	II	37
	III	36
	IV	2
	tot	80
epiRIL #148
	I	3	2.35043
	II	39
	III	71
	IV	4
	tot	117
epiRIL #193
	I	7	2.5461
	II	64
	III	69
	IV	1
	tot	141
epiRIL #229
	I	7	2.45652
	II	52
	III	76
	IV	3
	tot	138
epiRIL #454
	I	19	2.57627
	II	38
	III	53
	IV	8
	tot	118
epiRIL #508
	I	4	2.42105
	II	33
	III	57
	IV	1
	tot	95

## Sheet: Figure 1-figure supplement 3b
Figure 1-figure supplement 3b: Quantification of resistance against necrotrophic Pletosphaerella cucumerina. Listed are diameters of necrotic lesions (mm) at 9dpi.
	Col-0 (#602) 1				epiRIL #71 1				epiRIIL #92 1				epiRIL #93 1				epiRIIL #148 1				epiRILI #193				epiRIL #229				epiRIL #454 1				epiRIL #508 1
Plant	Leaf 1	Leaf 2	Leaf 3	Leaf 4	Leaf 1	Leaf 2	Leaf 3	Leaf 4	Leaf 1	Leaf 2	Leaf 3	Leaf 4	Leaf 1	Leaf 2	Leaf 3	Leaf 4	Leaf 1	Leaf 2	Leaf 3	Leaf 4	Leaf 1	Leaf 2	Leaf 3	Leaf 4	Leaf 1	Leaf 2	Leaf 3	Leaf 4	Leaf 1	Leaf 2	Leaf 3	Leaf 4	Leaf 1	Leaf 2	Leaf 3	Leaf 4
1	2.4	2	2.3	2.5	2.3	2.3	2.2	2.3	2.5	1.8	2.8	2.7	2.4	3.1	2.5	2	2.2	2.4	2.2	2.3	2.2	1.5	1.5	1	2.4	3.2	2.3	2.2	2.7	2.4	2.2	2.5	2.5	2.3	4	2.5
2	2.2	2.3	2.2	2.4	2.2	2.5	2.3	2.5	2.4	2.1	3.2	2.2	2.2	2.3	1.9	2.7	2.7	2.5	2.6	2.5	1.7	2	2	1.7	2.4	2.3	2.5	3.3	3.2	2.7	2.6	2.4	3	2.1	2.2	2.5
3	2.7	2.7			2.2	2.6	2.2		2.3	2.7	2.7	2.2	2.1	1.5	2	2.1	2.2	2.1	2.2	2.5	1.7	2.1	2.4	1.8	3	2.9	2.7	2.1	2.8	3	2.3	2.3	2.2	2.4	2.5	2.6
4	2.5	2.3	1.9	3	2.3	2.4	2.3	1.5	2.3	2.4	2.2	2.5	2.5	1.9	2.2	2.4	2.1	2.2	2.1	2.3	2	2	2.2	2.5	2.8	2.2	1.9	2.2	2.3	2.2	3	2.9	2.2	2.3	2.2	2.4
5					2.6	2.4	2.5	2.7	2.3	2.3	2.6		1.8	2	2.5	2.4	2.3	2	2.6	2.2	2.1	1.9	2.4	2.3	2	2.4	2.2	2.3	2.4	2.2	2.2	2.4	3.3	2.3	2.7	2.6
6	2.5	2.4	2.4	2.7	2.7	2.5	2.3	2.5	2.3	2.4	2.5	2.3	2.3	2.4	2.5	2.3	2.8	1.8	3	1.7	2.1	2.2	2.3	2.4	2.5	2.4	2	2.3	1.5	1.5	1.5	1	2.3	2.4	2.2	2.3
7	2.5	2.1	2.3		2.3	2.4	2.3	3	2.3	2.4	2.2	2.1	2.5	2.4	2.3	2.5	2	2.3	2.5		1.8	1.8	2.3	1	2.2	2.3	2.1	2.2	2	2.1	2.3	2.4	2.6	2.3	2.7
8	2.9	2.2	2.2	2.1	2.1	2.3	2.3	2.2	2.1	2.1	2.5	1.9					2	2.6	2.4	2	1.5	2.5	1.8	2.1	2	2.4	2.4	2	2.5	2.5	2.4	2.8	2.1	2.4	1.8	2.6
9	2.4	2.5	2.3	1.5	2.3	2.4	2.4	2.2	2.1	2.7	2.6	2.3	2.5	1.8	2.4	1.5	2.3	2.4	2.3	2.1	1.8	1.8	1.9	2.4	2.6	2.3	2.9	1.9	2.4	3	2.3		2.3	2.6	1.5	2.4
10	2.6	2.6	2.5	2.2	2.6	2.5	2.3	2.4	2.4	2.5	2.4	2.7	2.6	2.3	2.3	2.5	2.6	2.5	2.4	3	2.5	2.6	2	2.4	3.3	2.5	2.4	2.7	2.5	2.1	2.4	1.5	2.4	2	2.2	2.7
11	3.2	2.5	2.7		2.4	2.4	2.1	2.5	2.4	2.5	2.5	2.2	2.2	2.7	2.3	2.5	2.3	1.8	2.5	2.2	2	2	2.1	2.1	2.2	2.2	2.1	2.2	2.6	2.2	2.5	2.4	2.1	2.7	2.7	2.4
12	2.2	2.4	2.8	2.4	2.8	2.4	2.7	2.6	2.5	2.3	2.2	2.6	2.4	2.2	2.4	2.2	2.2	2.2	2.2		2.4	2.4	2.1	2.4	3	2.5	2.2	2.7	1.5	1.5	1.5	2.6	2.7	2.6	2.5	2
1 missing values represent leaves that were not inoculated.

## Sheet: Figure 1-figure supplement 3c
Figure 1-figure supplement 3c: Quantification of salt tolerance. Listed are numbers of seedlings developing full cotyledons after 6 days of growth on agar with increasing concentrations of NaCl.
Line	Col-0 (#602)				epiRIL #71				epiRIIL #92				epiRIL #93				epiRIIL #148				epiRILI #193				epiRIL #229				epiRIL #454				epiRIL #508
NaCl concentration	0mM	50mM	75mM	100mM	0mM	50mM	75mM	100mM	0mM	50mM	75mM	100mM	0mM	50mM	75mM	100mM	0mM	50mM	75mM	100mM	0mM	50mM	75mM	100mM	0mM	50mM	75mM	100mM	0mM	50mM	75mM	100mM	0mM	50mM	75mM	100mM
Germinated	48	76	53	4	54	75	68	64	48	78	69	26	42	67	47	15	51	83	71	26	59	81	76	55	42	83	82	66	54	68	44	22	64	79	71	56
Ungerminated	2	14	41	148	1	11	19	103	1	11	19	120	12	17	38	79	7	9	16	66	3	11	13	46	1	6	9	26	4	25	39	87	3	5	12	49
