# Supplementary material for: Identification and characterisation of hypomethylated DNA loci controlling quantitative resistance in Arabidopsis
Source: eLife. 2019 Jan 4;8:e40655. doi: 10.7554/eLife.40655 (PMC6342528; doi:10.7554/eLife.40655)
Supplement: Figure 1—figure supplement 4—source data 1. [file elife-40655-fig1-figsupp4-data1.xlsx]

## Sheet: Figure 1-figure supplement 4a
Figure 1-figure supplement 4a: relative expression values of SA-dependent PR1, normalized to the average expression values of three constitutively exressed genes (At1G13440, At5G25760 and At2G28390).
48hpi:
	Wt (602)		71		92		93		148		193		229		454		508
Replicate	Mock	Hpa	Mock	Hpa	Mock	Hpa	Mock	Hpa	Mock	Hpa	Mock	Hpa	Mock	Hpa	Mock	Hpa	Mock	Hpa
I	0.317504	4.69553	0.528209	53.8088	0.437194	65.3975	0.236342	35.6467	0.40281	41.8891	0.501847	29.8261	0.725056	55.2105	13.6301	24.6564	2.42896	125.917
II	1.58044	27.2508	0.380755	58.3542	1.29986	18.4656	4.76367	50.1427	91.9012	60.4111	0.801237	54.2169	0.720536	45.154	1.31625	17.3391	4.00681	162.913
III	2.31561	99.9265	1.15527	27.3185	0.248788	57.2525	0.298637	71.4553	1.516	14.2032	0.821153	27.8309	5.3128	39.926	0.163798	46.9913	0.458591	127.603
72hpi:
	Wt (602)		71		92		93		148		193		229		454		508
Replicate	Mock	Hpa	Mock	Hpa	Mock	Hpa	Mock	Hpa	Mock	Hpa	Mock	Hpa	Mock	Hpa	Mock	Hpa	Mock	Hpa
I	0.391149	104.471	1.14343	113.331	0.249278	252.31	0.0557575	172.198	1.44441	388.942	0.658831	290.426	2.57602	318.946	0.283521	158.934	0.480677	170.424
II	0.433329	50.7097	2.44447	202.548	1.1249	465.586	0.213939	137.146	0.175571	176.448	0.818296	424.27	1.56867	137.579	1.00984	103.903	0.878361	341.696
III	0.265123	105.697	0.382796	151.526	1.68947	109.035	0.233584	90.2524	0.228743	252.415	0.731293	215.013	0.949186	272.744	1.81614	152.263	0.189753	535.762

## Sheet: Figure 1-figure supplement 4b
Figure 1-figure supplement 4b: Percentage of callose-arrested and non-arrested conidiospores of Hpa at 48 hpi.
Wt (602)		71		92		93		148		193		229		454		508
Blocked	Unblocked	Blocked	Unblocked	Blocked	Unblocked	Blocked	Unblocked	Blocked	Unblocked	Blocked	Unblocked	Blocked	Unblocked	Blocked	Unblocked	Blocked	Unblocked
129	204	148	125	203	162	139	126	92	82	87	103	135	99	98	75	148	121
