# Supplementary material for: Identification and characterisation of hypomethylated DNA loci controlling quantitative resistance in Arabidopsis
Source: eLife. 2019 Jan 4;8:e40655. doi: 10.7554/eLife.40655 (PMC6342528; doi:10.7554/eLife.40655)
Supplement: Figure 1—figure supplement 5—source data 1. [file elife-40655-fig1-figsupp5-data1.xlsx]

## Sheet: Figure 1-figure supplement 5
Figure 1-figure supplement 5: Trypan blue scoring for transgenerational stability of Hpa resistance in Hpa-resistant epiRILs
F9	Col-0 (#602)												Class: Hpa colonization classes (see Supporting Figure 1)
F10	#602-1		#602-2		#602-3		#602-4		#602-5				Number: number of leaves in each Hpa colonization class
Class	Number		Number		Number		Number		Number				RI: resistance index (see Methods section for details)
I	47		44		50		60		38
II	24		40		21		30		17
III	79		69		54		88		50
IV	21		13		13		17		6
tot	171		166		138		195		111
RI	2.56725		2.69277		2.78261		2.68205		2.78378
F9	epiRIL #71
F10	#71-1		#71-2		#71-3		#71-4		#71-5
Class	Number		Number		Number		Number		Number
I	81		77		95		90		90
II	32		32		19		26		30
III	79		84		71		61		41
IV	7		8		12		7		6
tot	199		201		197		184		167
RI	2.9397		2.88557		3		3.08152		3.22156
F9	epiRIL #92
F10	#92-1		#92-2		#92-3		#92-4		#92-5
Class	Number		Number		Number		Number		Number
I	82		92		106		100		78
II	46		50		49		47		34
III	50		53		71		53		46
IV	6		6		7		8		7
tot	184		201		233		208		165
RI	3.1087		3.13433		3.09013		3.14904		3.10909
F9	epiRIL #93
F10	#93-1		#93-2		#93-3		#93-4		#93-5
Class	Number		Number		Number		Number		Number
I	99		98		112		109		96
II	25		38		30		28		24
III	24		44		45		42		23
IV	3		2		5		5		3
tot	151		182		192		184		146
RI	3.45695		3.27473		3.29688		3.30978		3.4589
F9	epiRIL #148
F10	#148-1		#148-2		#148-3		#148-4		#148-5
Class	Number		Number		Number		Number		Number
I	108		70		100		88		77
II	19		22		34		22		19
III	15		76		35		35		66
IV	1		10		6		5		7
tot	143		178		175		150		169
RI	3.63636		2.85393		3.30286		3.28667		2.98225
F9	epiRIL #193
F10	#193-1		#193-2		#193-3		#193-4		#193-5
Class	Number		Number		Number		Number		Number
I	102		111		88		112		101
II	41		28		24		25		23
III	46		28		47		43		30
IV	7		7		10		6		4
tot	196		174		169		186		158
RI	3.21429		3.39655		3.12426		3.30645		3.39873
F9	epiRIL #229
F10	#229-1		#229-2		#229-3		#229-4		#229-5
Class	Number		Number		Number		Number		Number
I	107		91		92		117		98
II	34		32		44		31		22
III	20		42		23		33		31
IV	6		8		9		6		6
tot	167		173		168		187		157
RI	3.4491		3.19075		3.30357		3.38503		3.35032
F9	epiRIL #454
F10	#454-1		#454-2		#454-3		#454-4		#454-5
Class	Number		Number		Number		Number		Number
I	160		108		149		155		134
II	6		18		19		14		11
III	5		18		32		5		25
IV	0		4		7		3		6
tot	171		148		207		177		176
RI	3.90643		3.55405		3.49758		3.81356		3.55114
F9	epiRIL #508
F10	#508-1		#508-2		#508-3		#508-4		#508-5
Class	Number		Number		Number		Number		Number
I	79		54		84		96		110
II	26		8		18		25		23
III	62		14		62		39		42
IV	9		3		7		8		6
tot	176		79		171		168		181
RI	2.99432		3.43038		3.04678		3.24405		3.30939
