# Supplementary material for: Identification and characterisation of hypomethylated DNA loci controlling quantitative resistance in Arabidopsis
Source: eLife. 2019 Jan 4;8:e40655. doi: 10.7554/eLife.40655 (PMC6342528; doi:10.7554/eLife.40655)
Supplement: Figure 1—source data 1. [file elife-40655-fig1-data1.xlsx]

## Sheet: Figure 1a
Figure 1a: Trypan blue scoring of Hpa colonization in leaves of 123 epiRILs, two parental lines (F4) and five Col-0 control lines.
line	Class	Number	RI
F4 Col-0							Class: Hpa colonization classes (see Supporting Figure 1)
	I	30	2.4955				Number: number of leaves in each Hpa colonization class
	II	65					RI: resistance index (see Methods section for details)
	III	112
	IV	15
	tot	222
F4 ddm1-2
	II	93
	III	6
	IV	0
	tot	99
Col-0 (#C600)
	I	51	2.61798
	II	19
	III	97
	IV	11
	tot	178
Col-0 (#C601)
	I	38	2.50888
	II	22
	III	97
	IV	12
	tot	169
Col-0 (#C602)
	I	38	2.4802
	II	38
	III	109
	IV	17
	tot	202
Col-0 (#C603)
	I	33	2.4881
	II	27
	III	97
	IV	11
	tot	168
Col-0 (#C604
	I	34	2.29224
	II	26
	III	129
	IV	30
	tot	219
epiRIL #8
	I	98	3.27684
	II	38
	III	33
	IV	8
	tot	177
epiRIL #11
	I	45	2.50888
	II	20
	III	80
	IV	24
	tot	169
epiRIL #14
	I	62	2.9434
	II	31
	III	61
	IV	5
	tot	159
epiRIL #18
	I	55	2.5736
	II	22
	III	101
	IV	19
	tot	197
epiRIL #20
	I	23	2.36066
	II	30
	III	120
	IV	10
	tot	183
epiRIL #24
	I	56	2.7125
	II	17
	III	72
	IV	15
	tot	160
epiRIL #36
	I	41	2.46995
	II	18
	III	110
	IV	14
	tot	183
epiRIL #46
	I	43	2.65445
	II	45
	III	97
	IV	6
	tot	191
epiRIL #52
	I	40	2.51892
	II	31
	III	99
	IV	15
	tot	185
epiRIL #53
	I	31	2.33166
	II	29
	III	114
	IV	25
	tot	199
epiRIL #54
	I	36	2.54587
	II	57
	III	115
	IV	10
	tot	218
epiRIL #55
	I	55	3.0915
	II	60
	III	35
	IV	3
	tot	153
epiRIL #60
	I	51	2.9396
	II	42
	III	52
	IV	4
	tot	149
epiRIL #62
	I	27	2.37561
	II	38
	III	125
	IV	15
	tot	205
epiRIL #64
	I	24	2.47619
	II	47
	III	82
	IV	15
	tot	168
epiRIL #69
	I	40	2.40722
	II	16
	III	121
	IV	17
	tot	194
epiRIL #70
	I	47	2.89756
	II	92
	III	64
	IV	2
	tot	205
epiRIL #71
	I	95	3.25551
	II	97
	III	33
	IV	2
	tot	227
epiRIL #73
	I	24	2.74627
	II	7
	III	31
	IV	5
	tot	67
epiRIL #92
	I	76	3.25871
	II	101
	III	24
	IV	0
	tot	201
epiRIL #93
	I	68	3.38462
	II	81
	III	6
	IV	1
	tot	156
epiRIL #94
	I	22	2.42473
	II	44
	III	111
	IV	9
	tot	186
epiRIL #95
	I	58	2.79275
	II	44
	III	84
	IV	7
	tot	193
epiRIL #98
	I	29	3
	II	70
	III	29
	IV	0
	tot	128
epiRIL #99
	I	33	2.51832
	II	47
	III	97
	IV	14
	tot	191
epiRIL #101
	I	57	2.76142
	II	44
	III	88
	IV	8
	tot	197
epiRIL #108
	I	32	2.41827
	II	36
	III	127
	IV	13
	tot	208
epiRIL #112
	I	32	2.46939
	II	35
	III	122
	IV	7
	tot	196
epiRIL #114
	I	62	3.17178
	II	67
	III	34
	IV	0
	tot	163
epiRIL #118
	I	31	2.61667
	II	56
	III	86
	IV	7
	tot	180
epiRIL #122
	I	41	3.0292
	II	60
	III	35
	IV	1
	tot	137
epiRIL #137
	I	48	2.51563
	II	22
	III	103
	IV	19
	tot	192
epiRIL #144
	I	36	2.50256
	II	42
	III	101
	IV	16
	tot	195
epiRIL #147
	I	53	2.88739
	II	95
	III	70
	IV	4
	tot	222
epiRIL #148
	I	77	3.28022
	II	79
	III	26
	IV	0
	tot	182
epiRIL #150
	I	55	2.885
	II	72
	III	68
	IV	5
	tot	200
epiRIL #159
	I	29	2.46961
	II	41
	III	97
	IV	14
	tot	181
epiRIL #164
	I	38	2.40476
	II	29
	III	123
	IV	20
	tot	210
epiRIL #166
	I	44	2.46939
	II	27
	III	102
	IV	23
	tot	196
epiRIL #169
	I	38	2.45918
	II	36
	III	100
	IV	22
	tot	196
epiRIL #170
	I	33	2.3
	II	20
	III	134
	IV	23
	tot	210
epiRIL #172
	I	57	2.45909
	II	23
	III	104
	IV	36
	tot	220
epiRIL #183
	I	28	2.38916
	II	42
	III	114
	IV	19
	tot	203
epiRIL #193
	I	95	3.30992
	II	132
	III	10
	IV	5
	tot	242
epiRIL #195
	I	43	2.34296
	II	30
	III	183
	IV	21
	tot	277
epiRIL #202
	I	59	2.62963
	II	68
	III	127
	IV	16
	tot	270
epiRIL #208
	I	76	3.11574
	II	91
	III	47
	IV	2
	tot	216
epiRIL #215
	I	29	2.46835
	II	60
	III	141
	IV	7
	tot	237
epiRIL #216
	I	48	3
	II	104
	III	44
	IV	2
	tot	198
epiRIL #218
	I	37	2.86458
	II	94
	III	59
	IV	2
	tot	192
epiRIL #222
	I	34	2.52549
	II	84
	III	119
	IV	18
	tot	255
epiRIL #225
	I	53	2.63927
	II	47
	III	106
	IV	13
	tot	219
epiRIL #229
	I	119	3.35401
	II	136
	III	16
	IV	3
	tot	274
epiRIL #232
	I	39	2.91765
	II	84
	III	41
	IV	6
	tot	170
epiRIL #238
	I	36	2.43056
	II	39
	III	123
	IV	18
	tot	216
epiRIL #244
	I	40	2.63964
	II	69
	III	106
	IV	7
	tot	222
epiRIL #252
	I	21	2.25806
	II	40
	III	169
	IV	18
	tot	248
epiRIL #257
	I	42	2.56221
	II	58
	III	97
	IV	20
	tot	217
epiRIL #258
	I	60	3.00465
	II	99
	III	53
	IV	3
	tot	215
epiRIL #260
	I	47	2.37945
	II	25
	III	158
	IV	23
	tot	253
epiRIL #262
	I	34	2.45238
	II	25
	III	92
	IV	17
	tot	168
epiRIL #275
	I	34	2.59799
	II	60
	III	96
	IV	9
	tot	199
epiRIL #276
	I	37	2.52459
	II	39
	III	90
	IV	17
	tot	183
epiRIL #277
	I	25	2.59302
	II	60
	III	79
	IV	8
	tot	172
epiRIL #297	Class	Number	RI
	I	40	2.97838
	II	103
	III	40
	IV	2
	tot	185
epiRIL #305
	I	40	2.80128
	II	53
	III	55
	IV	8
	tot	156
epiRIL #315
	I	59	2.63942
	II	39
	III	86
	IV	24
	tot	208
epiRIL #323
	I	41	2.87861
	II	71
	III	60
	IV	1
	tot	173
epiRIL #326
	I	38	2.40659
	II	18
	III	106
	IV	20
	tot	182
epiRIL #333
	I	28	2.37662
	II	16
	III	96
	IV	14
	tot	154
epiRIL #340
	I	21	2.40828
	II	39
	III	97
	IV	12
	tot	169
epiRIL #344
	I	19	2.34884
	II	33
	III	109
	IV	11
	tot	172
epiRIL #350
	I	64	3.0765
	II	73
	III	42
	IV	4
	tot	183
epiRIL #356
	I	63	3.07812
	II	83
	III	44
	IV	2
	tot	192
epiRIL #361
	I	46	2.44086
	II	20
	III	90
	IV	30
	tot	186
epiRIL #362
	I	38	2.58382
	II	43
	III	74
	IV	18
	tot	173
epiRIL #363
	I	57	2.9418
	II	67
	III	62
	IV	3
	tot	189
epiRIL #366
	I	37	2.45729
	II	37
	III	105
	IV	20
	tot	199
epiRIL #368
	I	50	2.49296
	II	23
	III	122
	IV	18
	tot	213
epiRIL #371
	I	33	2.51381
	II	41
	III	93
	IV	14
	tot	181
epiRIL #375
	I	71	2.80165
	II	66
	III	91
	IV	14
	tot	242
epiRIL #391
	I	61	3.13636
	II	105
	III	30
	IV	2
	tot	198
epiRIL #393
	I	33	2.36866
	II	33
	III	132
	IV	19
	tot	217
epiRIL #394
	I	26	1.96571
	II	4
	III	83
	IV	62
	tot	175
epiRIL #400
	I	20	2.3066
	II	40
	III	137
	IV	15
	tot	212
epiRIL #408
	I	28	2.29798
	II	29
	III	115
	IV	26
	tot	198
epiRIL #410
	I	30	2.35745
	II	40
	III	149
	IV	16
	tot	235
epiRIL #425
	I	44	2.85116
	II	97
	III	72
	IV	2
	tot	215
epiRIL #432
	I	61	2.97768
	II	99
	III	62
	IV	2
	tot	224
epiRIL #434
	I	40	2.35887
	II	36
	III	145
	IV	27
	tot	248
epiRIL #437
	I	50	2.69604
	II	62
	III	111
	IV	4
	tot	227
epiRIL #438
	I	71	3.03791
	II	81
	III	55
	IV	4
	tot	211
epiRIL #439
	I	46	2.46957
	II	37
	III	126
	IV	21
	tot	230
epiRIL #454
	I	90	3.31944
	II	105
	III	21
	IV	0
	tot	216
epiRIL #458
	I	47	2.58333
	II	50
	III	120
	IV	11
	tot	228
epiRIL #466
	I	57	2.73214
	II	55
	III	107
	IV	5
	tot	224
epiRIL #467
	I	62	2.75877
	II	58
	III	99
	IV	9
	tot	228
epiRIL #471
	I	42	2.40807
	II	26
	III	136
	IV	19
	tot	223
epiRIL #473
	I	45	2.36444
	II	19
	III	134
	IV	27
	tot	225
epiRIL #477
	I	48	2.53138
	II	49
	III	124
	IV	18
	tot	239
epiRIL #480
	I	20	2.35119
	II	27
	III	113
	IV	8
	tot	168
epiRIL #488
	I	48	2.80328
	II	62
	III	62
	IV	11
	tot	183
epiRIL #492
	I	43	2.72512
	II	72
	III	91
	IV	5
	tot	211
epiRIL #493
	I	26	2.32692
	II	40
	III	118
	IV	24
	tot	208
epiRIL #494
	I	28	2.56923
	II	64
	III	94
	IV	9
	tot	195
epiRIL #495
	I	24	2.34842
	II	43
	III	140
	IV	14
	tot	221
epiRIL #497
	I	36	2.31507
	II	16
	III	148
	IV	19
	tot	219
epiRIL #500
	I	50	2.68889
	II	73
	III	84
	IV	18
	tot	225
epiRIL #503
	I	33	2.70526
	II	71
	III	83
	IV	3
	tot	190
epiRIL #506
	I	45	2.48511
	II	47
	III	120
	IV	23
	tot	235
epiRIL #508
	I	107	3.35802
	II	118
	III	16
	IV	2
	tot	243
epiRIL #523
	I	43	2.65368
	II	74
	III	105
	IV	9
	tot	231
epiRIL #538
	I	44	2.4
	II	39
	III	140
	IV	27
	tot	250
epiRIL #539
	I	32	2.47059
	II	50
	III	129
	IV	10
	tot	221
epiRIL #556
	I	68	3.17273
	II	123
	III	28
	IV	1
	tot	220
epiRIL #558
	I	49	2.51707
	II	35
	III	94
	IV	27
	tot	205
epiRIL #559
	I	49	2.63393
	II	66
	III	87
	IV	22
	tot	224
epiRIL #561
	I	26	2.36493
	II	47
	III	116
	IV	22
	tot	211
epiRIL #567
	I	65	3.10798
	II	107
	III	40
	IV	1
	tot	213
epiRIL #570
	I	35	2.40097
	II	34
	III	117
	IV	21
	tot	207
epiRIL #572
	I	36	2.52299
	II	34
	III	89
	IV	15
	tot	174
epiRIL #573
	I	21	2.48069
	II	75
	III	132
	IV	5
	tot	233
epiRIL #579
	I	68	2.97233
	II	112
	III	71
	IV	2
	tot	253

## Sheet: Figure 1b
Figure 1b: Linkage analysis of resistance index and green leaf area (GLA) of three-week-old epiRIL seedlings
Marker	Chromosome	Position (cM)	RI LOD (threshold = 3.4)	GLA LOD (threshold = 3.9)
MM1	1	0	1.12607	2.22544			cM: centimorgan
MM2	1	1.7292	1.14029	2.93978			LOD: logarithm of odds score
c1.loc2	1	2	1.45949	0.985444
c1.loc4	1	4	1.94886	1.21459
c1.loc6	1	6	2.49378	1.40671
c1.loc8	1	8	3.02238	1.54272
c1.loc10	1	10	3.45446	1.60288
MM4	1	11.7312	4.16156	1.354
c1.loc12	1	12	4.19944	1.40447
MM5	1	13.4604	4.00374	1.41042
c1.loc14	1	14	3.97328	1.61088
c1.loc16	1	16	4.31159	1.87072
MM7	1	16.4465	3.84043	1.59098
c1.loc18	1	18	4.92339	2.1405
MM10	1	18.1757	5.01886	2.21629
c1.loc20	1	20	6.57842	2.13934
c1.loc22	1	22	7.37668	1.93071
MM11	1	23.228	7.67182	1.48895
MM12	1	23.7851	7.55897	1.47444
c1.loc24	1	24	7.05612	1.48556
c1.loc26	1	26	7.2889	1.6714
MM17	1	26.1316	7.08306	2.15581
MM20	1	26.6886	7.17281	2.1399
c1.loc28	1	28	7.20397	1.23838
MM25	1	29.0351	7.81123	1.00139
c1.loc30	1	30	7.86356	0.80822
MM27	1	30.1682	7.10491	1.05708
MM33	1	30.7253	7.0849	0.931773
c1.loc32	1	32	7.32531	1.39163
MM39	1	33.0717	7.50608	1.73748
MM52	1	33.6284	6.94903	0.563809
c1.loc34	1	34	6.94013	0.573912
MM58	1	34.7609	7.3407	0.818832
c1.loc36	1	36	7.2166	1.65315
MM87	1	36.49	7.21295	1.59359
MM91	1	37.0469	7.2139	1.56603
c1.loc38	1	38	7.64949	0.858993
c1.loc40	1	40	7.99868	0.592831
MM101	1	40.0328	8.24555	1.05224
MM114	1	40.5898	8.28031	0.682587
MM123	1	41.1469	8.23431	0.25275
c1.loc42	1	42	9.05815	0.38511
c1.loc44	1	44	7.59244	0.657579
MM126	1	44.7962	6.50765	0.740738
MM128	1	45.9293	6.47644	0.723125
c1.loc46	1	46	6.90316	0.637152
c1.loc48	1	48	6.82834	0.724114
c1.loc50	1	50	6.89786	0.869222
c1.loc52	1	52	6.80409	1.01477
c1.loc54	1	54	6.53035	1.14462
c1.loc56	1	56	6.10297	1.24437
c1.loc58	1	58	5.57991	1.30666
c1.loc60	1	60	5.01986	1.33672
MM147	1	61.1983	3.33563	2.48466
c1.loc62	1	62	3.34902	2.48104
MM150	1	62.3314	3.46766	4.27361
MM157	1	63.4645	3.63295	2.02701
c1.loc64	1	64	3.27326	1.02962
c1.loc66	1	66	3.13641	0.965622
MM158	1	67.8021	2.91484	0.584329
c1.loc68	1	68	2.93925	0.617686
MM159	1	68.3591	2.89409	0.606653
c1.loc70	1	70	3.23335	0.477583
MM160	1	70.0883	3.35863	0.504145
c1.loc72	1	72	2.32712	0.623863
c1.loc74	1	74	2.31428	0.662
c1.loc76	1	76	2.29458	0.707506
c1.loc78	1	78	2.25593	0.754219
c1.loc80	1	80	2.19292	0.798888
c1.loc82	1	82	2.10228	0.838295
c1.loc84	1	84	1.98317	0.869147
c1.loc86	1	86	1.8379	0.888481
c1.loc88	1	88	1.672	0.894227
c1.loc90	1	90	1.49362	0.885686
c1.loc92	1	92	1.31215	0.863698
c1.loc94	1	94	1.13653	0.830426
c1.loc96	1	96	0.973918	0.788843
c1.loc98	1	98	0.828965	0.742135
c1.loc100	1	100	0.703836	0.693203
c1.loc102	1	102	0.598653	0.644385
c1.loc104	1	104	0.512149	0.597356
c1.loc106	1	106	0.442283	0.553188
MM163	1	106.313	0.4327	0.546576
MM166	2	0	7.97395	0.830871
MM167	2	0.557051	9.67761	0.856106
c2.loc2	2	2	9.26002	0.896445
c2.loc4	2	4	9.25485	0.883653
MM168	2	4.20633	9.42053	0.749858
MM171	2	5.33945	10.1417	0.787767
c2.loc6	2	6	10.7483	0.685502
MM240	2	6.47258	10.1459	0.976727
MM330	2	7.02963	10.074	0.71829
MM335	2	7.58669	9.7656	0.419309
c2.loc8	2	8	8.64621	1.21512
MM357	2	8.71981	7.63562	1.14169
MM371	2	9.85294	7.25219	0.409951
c2.loc10	2	10	6.70679	0.380389
MM372	2	10.41	6.88641	0.396247
MM373	2	10.9671	6.94609	0.3874
c2.loc12	2	12	5.08702	0.262557
MM374	2	12.6963	4.25184	1.94721
MM378	2	13.2533	4.86581	0.0440337
MM379	2	13.8104	4.49979	1.70582
c2.loc14	2	14	3.01046	0.472088
MM380	2	14.9435	2.29889	0.397752
c2.loc16	2	16	2.24168	0.174328
c2.loc18	2	18	1.8782	0.168065
c2.loc20	2	20	1.4878	0.162591
MM382	2	21.5118	1.3089	0.0143344
c2.loc22	2	22	1.70691	0.120638
c2.loc24	2	24	1.628	0.128356
c2.loc26	2	26	1.54738	0.132469
c2.loc28	2	28	1.44893	0.137694
c2.loc30	2	30	1.33653	0.144079
c2.loc32	2	32	1.21679	0.151339
c2.loc34	2	34	1.09698	0.15923
MM383	2	35.6225	0.909497	0.115393
c2.loc36	2	36	1.89543	2.2695
c2.loc38	2	38	2.00944	2.49353
MM385	2	39.2717	2.09285	2.66656
c2.loc40	2	40	0.83005	0.53955
c2.loc42	2	42	0.882455	0.408774
c2.loc44	2	44	0.929681	0.434258
c2.loc46	2	46	0.967735	0.485821
c2.loc48	2	48	0.9945	0.552773
c2.loc50	2	50	1.0081	0.630498
c2.loc52	2	52	1.00764	0.714885
c2.loc54	2	54	0.993492	0.801743
c2.loc56	2	56	0.967209	0.887087
c2.loc58	2	58	0.931216	0.967566
c2.loc60	2	60	0.888338	1.04077
MM388	2	61.3719	0.856398	1.08601
MM392	3	0	0.337473	0.364863
c3.loc2	3	2	0.337012	0.389343
c3.loc4	3	4	0.335408	0.416593
c3.loc6	3	6	0.332383	0.445795
c3.loc8	3	8	0.327733	0.47555
c3.loc10	3	10	0.321417	0.50394
c3.loc12	3	12	0.313606	0.528806
c3.loc14	3	14	0.304686	0.548201
c3.loc16	3	16	0.295165	0.560858
c3.loc18	3	18	0.285509	0.566445
c3.loc20	3	20	0.275884	0.56548
c3.loc22	3	22	0.265518	0.558868
c3.loc24	3	24	0.247436	0.545956
MM396	3	25.4545	0.260297	0.444018
c3.loc26	3	26	0.257263	0.43744
MM398	3	26.5876	0.206408	0.433671
c3.loc28	3	28	0.799714	0.895838
c3.loc30	3	30	0.84333	0.768253
c3.loc32	3	32	0.934939	0.621406
c3.loc34	3	34	1.04549	0.488863
MM399	3	34.7999	0.978185	0.0890919
MM400	3	35.933	1.50848	0.0837157
c3.loc36	3	36	1.9136	0.0837698
MM402	3	36.49	1.91518	0.0788027
MM405	3	37.6232	1.61909	0.198612
c3.loc38	3	38	1.64819	0.193553
c3.loc40	3	40	1.61941	0.200465
c3.loc42	3	42	1.38876	0.198746
MM414	3	42.6755	1.90415	0.148556
MM415	3	43.2326	1.50773	0.13846
c3.loc44	3	44	1.06974	0.18907
MM418	3	44.3657	1.24186	0.220172
c3.loc46	3	46	1.49263	0.203638
MM427	3	46.0949	1.40368	0.230294
MM432	3	46.652	1.3179	0.240733
MM466	3	47.209	1.42728	0.252402
MM495	3	47.7661	1.23815	0.180692
c3.loc48	3	48	0.979146	0.289756
MM499	3	48.3231	0.894813	0.301093
MM515	3	49.4563	1.59331	0.39571
c3.loc50	3	50	1.56776	0.487156
MM527	3	50.5894	1.35464	0.187591
MM529	3	51.1464	1.107	1.16424
MM531	3	51.7035	1.92822	1.26991
c3.loc52	3	52	1.52733	0.547474
MM537	3	52.2606	1.53626	0.549407
c3.loc54	3	54	1.96373	0.493372
c3.loc56	3	56	1.89075	0.667569
c3.loc58	3	58	1.7958	0.865897
c3.loc60	3	60	1.6822	1.07019
c3.loc62	3	62	1.56919	1.26098
c3.loc64	3	64	1.73031	1.41922
MM544	3	64.2199	2.19648	1.53958
c3.loc66	3	66	1.4428	1.43483
c3.loc68	3	68	1.33713	1.32937
c3.loc70	3	70	1.27956	1.19768
c3.loc72	3	72	1.23034	1.05178
c3.loc74	3	74	1.18298	0.897477
c3.loc76	3	76	1.13639	0.740769
c3.loc78	3	78	1.09118	0.588286
c3.loc80	3	80	1.04859	0.446728
c3.loc82	3	82	1.00997	0.321999
c3.loc84	3	84	0.976374	0.218403
c3.loc86	3	86	0.948337	0.138149
c3.loc88	3	88	0.92566	0.0812979
c3.loc90	3	90	0.907095	0.046041
c3.loc92	3	92	0.888856	0.0289636
c3.loc94	3	94	0.850764	0.0233161
MM546	3	95.642	0.151897	0.214317
c3.loc96	3	96	0.833388	0.990213
c3.loc98	3	98	0.860374	1.02551
c3.loc100	3	100	0.861075	1.04046
MM547	3	101.437	0.860619	1.05104
MM550	4	0	4.08613	1.99895
MM551	4	1.72921	5.21877	2.02827
c4.loc2	4	2	5.23551	2.02879
MM552	4	2.28627	4.79955	2.14918
MM553	4	2.84333	4.61005	2.18576
MM586	4	3.40039	4.95855	2.22185
c4.loc4	4	4	6.49183	2.24965
MM587	4	4.53351	6.43415	2.24748
c4.loc6	4	6	7.3224	2.27197
c4.loc8	4	8	7.55689	2.29069
c4.loc10	4	10	7.34763	2.20067
MM654	4	11.1018	7.27951	2.12836
c4.loc12	4	12	7.10768	2.1136
MM661	4	12.2349	7.21588	1.8351
c4.loc14	4	14	6.31895	1.71108
c4.loc16	4	16	5.59197	1.26641
MM665	4	16.5724	4.45442	1.03053
MM666	4	17.1295	4.51207	1.0216
c4.loc18	4	18	4.73025	1.18663
c4.loc20	4	20	5.02586	1.41792
MM678	4	21.467	4.92106	1.51294
c4.loc22	4	22	4.58552	1.93928
MM679	4	22.024	4.58364	1.94207
c4.loc24	4	24	4.76437	1.92792
c4.loc26	4	26	4.83552	2.07893
c4.loc28	4	28	4.76091	2.17575
c4.loc30	4	30	4.54444	2.20732
c4.loc32	4	32	4.21921	2.17682
MM686	4	32.9821	3.84794	2.73105
c4.loc34	4	34	3.75813	2.55428
c4.loc36	4	36	3.58054	2.07144
c4.loc38	4	38	3.30037	1.59415
MM689	4	38.7774	2.52003	1.32465
c4.loc40	4	40	2.84296	1.40284
c4.loc42	4	42	2.69047	1.41651
MM691	4	42.4266	2.43525	1.40766
MM693	4	42.9837	2.42131	1.41031
c4.loc44	4	44	2.14647	1.74054
c4.loc46	4	46	1.98406	1.54093
c4.loc48	4	48	1.73692	1.27922
c4.loc50	4	50	1.43532	0.989856
c4.loc52	4	52	1.12708	0.717387
MM694	4	52.9857	0.931343	0.794897
MM695	4	53.5428	0.977711	0.611553
c4.loc54	4	54	1.27902	0.550179
MM698	4	54.6759	1.19245	0.609037
c4.loc56	4	56	0.671135	0.622892
c4.loc58	4	58	0.408665	0.618177
MM699	4	58.3252	0.463064	0.581828
c4.loc60	4	60	0.29213	0.647436
c4.loc62	4	62	0.214093	0.578368
c4.loc64	4	64	0.138234	0.485262
c4.loc66	4	66	0.0750274	0.381104
c4.loc68	4	68	0.0311805	0.279756
MM701	4	68.3272	0.0344941	0.451503
c4.loc70	4	70	0.0596812	0.4282
c4.loc72	4	72	0.0957472	0.379625
MM703	4	72.6647	0.20708	0.504934
c4.loc74	4	74	0.955004	0.255684
c4.loc76	4	76	0.944938	0.293995
c4.loc78	4	78	0.93736	0.398801
c4.loc80	4	80	0.932715	0.55617
c4.loc82	4	82	0.931337	0.736587
MM704	4	82.6668	0.931523	0.796334
MM706	5	0	1.19502	0.218804
c5.loc2	5	2	1.35626	0.348694
MM707	5	3.64926	1.41544	0.432986
c5.loc4	5	4	1.45896	0.801605
c5.loc6	5	6	1.81281	0.988282
c5.loc8	5	8	2.16094	1.22248
c5.loc10	5	10	2.46331	1.48236
c5.loc12	5	12	2.69317	1.75153
MM712	5	12.7369	2.87538	1.48827
c5.loc14	5	14	2.78982	1.24599
c5.loc16	5	16	2.68912	1.13873
c5.loc18	5	18	2.50876	1.00066
c5.loc20	5	20	2.26232	0.843772
c5.loc22	5	22	1.97836	0.684823
MM713	5	22.7389	1.87503	0.626804
MM715	5	23.2959	1.97774	0.640895
c5.loc24	5	24	2.11126	0.647445
MM716	5	24.4291	2.1714	0.688805
c5.loc26	5	26	2.29612	0.592712
c5.loc28	5	28	2.59137	0.459255
c5.loc30	5	30	2.74061	0.321255
MM718	5	30.9974	2.68804	0.253338
c5.loc32	5	32	2.52639	0.393833
MM719	5	32.7266	2.21889	0.570081
MM721	5	33.2837	2.24938	0.601167
c5.loc34	5	34	2.53535	0.393937
MM722	5	34.4168	2.86614	0.355026
MM724	5	34.9738	2.87862	0.385758
c5.loc36	5	36	3.07652	0.821194
MM725	5	36.107	3.24525	0.449606
MM726	5	36.664	3.25766	0.293691
MM728	5	37.7971	3.96037	0.259607
c5.loc38	5	38	3.76255	0.158515
MM731	5	38.3542	3.97048	0.192962
MM734	5	39.4873	4.29673	0.161479
c5.loc40	5	40	4.29781	0.15563
MM744	5	40.0444	4.41712	0.175488
MM823	5	41.1775	4.8682	0.368961
MM825	5	41.7346	4.45532	0.284117
c5.loc42	5	42	4.1787	0.250062
MM827	5	42.2916	4.18082	0.304281
MM832	5	43.4247	3.75738	1.10572
MM837	5	43.9818	4.01838	0.66331
c5.loc44	5	44	4.35907	0.0582156
MM845	5	45.1149	2.99597	0.0634064
MM849	5	45.672	3.30139	0.0660966
c5.loc46	5	46	3.25898	0.276992
MM853	5	46.229	3.2651	0.464359
MM854	5	47.3622	3.22271	0.440768
c5.loc48	5	48	3.40032	1.14906
c5.loc50	5	50	3.44402	1.24496
c5.loc52	5	52	3.44129	1.35152
c5.loc54	5	54	3.37578	1.44177
c5.loc56	5	56	3.22501	1.51946
MM859	5	56.4498	1.75032	1.27488
MM862	5	57.5829	2.42238	1.07173
c5.loc58	5	58	2.87186	1.08139
MM863	5	59.9293	2.63531	0.474044
c5.loc60	5	60	2.07507	0.635712
c5.loc62	5	62	1.66227	0.446793
MM865	5	63.5786	1.27778	0.16747
c5.loc64	5	64	1.30764	0.251534
MM867	5	65.9251	1.53395	0.298417

## Sheet: Figure 1c
Figure 1c: Correlation plots between peak marker haplotype (methylated Wt versus hypo-methylated ddm1-2) and RI (blue) or GLA (green).
		Haplotype								Haplotype
Line	RI	MM114	MM240	MM654	MM823			Line	GLA (mm2)	MM150			Haplotypes:	1: ddm1-2 (hypo-methylated)
epiRIL8	3.27684	1	-1	1	-1			epiRIL8	22.4527	1				-1: Wt (methylated)
epiRIL11	2.50888	-1	-1	-1	-1			epiRIL11	42.7908	-1
epiRIL14	2.9434	-1	1	-1	-1			epiRIL14	38.1868	-1
epiRIL18	2.5736	1	-1	-1	-1			epiRIL18	33.7018	1
epiRIL20	2.36066	-1	-1	-1	-1			epiRIL20	34.1457	-1
epiRIL24	2.7125	-1	-1	-1	-1			epiRIL24	31.5688	-1
epiRIL36	2.46995	-1	-1	-1	1			epiRIL36	36.2866	-1
epiRIL46	2.65445	1	-1	-1	1			epiRIL46	33.2682	-1
epiRIL52	2.51892	-1	-1	-1	-1			epiRIL52	36.7675	1
epiRIL53	2.33166	-1	-1	-1	-1			epiRIL53	39.2408	-1
epiRIL54	2.54587	-1	1	-1	-1			epiRIL54	38.1875	-1
epiRIL55	3.0915	-1	1	-1	1			epiRIL55	35.2786	-1
epiRIL60	2.9396	1	-1	1	-1			epiRIL60	34.9838	-1
epiRIL62	2.37561	-1	-1	-1	-1			epiRIL62	37.2975	-1
epiRIL64	2.47619	-1	-1	1	-1			epiRIL64	27.8239	-1
epiRIL69	2.40722	-1	-1	-1	-1			epiRIL69	31.174	-1
epiRIL70	2.89756	1	-1	1	1			epiRIL70	30.9399	1
epiRIL71	3.25551	1	1	1	-1			epiRIL71	36.1658	-1
epiRIL73	2.74627	-1	-1	-1	-1			epiRIL73	36.8123	-1
epiRIL92	3.25871	1	1	1	1			epiRIL92	35.3441	1
epiRIL93	3.38462	1	1	1	-1			epiRIL93	29.0876	-1
epiRIL94	2.42473	-1	-1	-1	-1			epiRIL94	41.3372	-1
epiRIL95	2.79275	-1	-1	-1	1			epiRIL95	38.4374	-1
epiRIL98	3	-1	1	1	1			epiRIL98	16.5526	1
epiRIL99	2.51832	-1	-1	-1	-1			epiRIL99	33.3208	-1
epiRIL101	2.76142	1	-1	-1	1			epiRIL101	39.1331	-1
epiRIL108	2.41827	-1	-1	-1	-1			epiRIL108	37.7774	-1
epiRIL112	2.46939	-1	-1	1	-1			epiRIL112	41.4596	-1
epiRIL114	3.17178	1	1	1	1			epiRIL114	24.1833	1
epiRIL118	2.61667	1	-1	-1	-1			epiRIL118	32.4636	1
epiRIL122	3.0292	-1	1	1	1			epiRIL122	29.3511	-1
epiRIL137	2.51563	1	-1	-1	-1			epiRIL137	23.3522	1
epiRIL144	2.50256	-1	-1	-1	-1			epiRIL144	41.759	-1
epiRIL147	2.88739	-1	-1	-1	-1			epiRIL147	45.2299	1
epiRIL148	3.28022	1	1	-1	-1			epiRIL148	37.183	-1
epiRIL150	2.885	1	-1	1	1			epiRIL150	40.6559	1
epiRIL159	2.46961	-1	-1	-1	-1			epiRIL159	42.0621	-1
epiRIL164	2.40476	-1	-1	-1	-1			epiRIL164	43.896	-1
epiRIL166	2.46939	-1	-1	-1	-1			epiRIL166	40.6946	-1
epiRIL169	2.45918	-1	-1	-1	-1			epiRIL169	31.048	-1
epiRIL170	2.3	-1	-1	-1	-1			epiRIL170	41.3756	-1
epiRIL172	2.45909	-1	-1	-1	1			epiRIL172	33.1752	-1
epiRIL183	2.38916	-1	-1	-1	-1			epiRIL183	44.3759	-1
epiRIL193	3.30992	-1	1	1	-1			epiRIL193	35.3937	-1
epiRIL195	2.34296	-1	-1	-1	-1			epiRIL195	34.7458	-1
epiRIL202	2.62963	1	-1	1	-1			epiRIL202	40.0989	-1
epiRIL208	3.11574	1	-1	1	1			epiRIL208	33.5121	1
epiRIL215	2.46835	-1	1	-1	-1			epiRIL215	34.5202	1
epiRIL216	3	-1	1	-1	1			epiRIL216	31.3623	-1
epiRIL218	2.86458	1	1	1	-1			epiRIL218	44.4843	-1
epiRIL222	2.52549	1	-1	1	-1			epiRIL222	37.3438	1
epiRIL225	2.63927	-1	-1	-1	-1			epiRIL225	43.7646	-1
epiRIL229	3.35401	1	1	-1	1			epiRIL229	48.1825	1
epiRIL232	2.91765	1	1	1	1			epiRIL232	19.1368	-1
epiRIL238	2.43056	-1	-1	-1	-1			epiRIL238	36.6775	-1
epiRIL244	2.63964	-1	-1	-1	1			epiRIL244	39.8491	1
epiRIL252	2.25806	-1	-1	-1	-1			epiRIL252	38.826	-1
epiRIL257	2.56221	-1	-1	-1	1			epiRIL257	37.3428	-1
epiRIL258	3.00465	-1	1	1	-1			epiRIL258	35.4014	-1
epiRIL260	2.37945	-1	-1	-1	-1			epiRIL260	35.8719	-1
epiRIL262	2.45238	-1	-1	-1	-1			epiRIL262	29.6043	-1
epiRIL275	2.59799	-1	-1	-1	-1			epiRIL275	34.9872	-1
epiRIL276	2.52459	-1	-1	-1	-1			epiRIL276	33.8624	-1
epiRIL277	2.59302	-1	-1	-1	-1			epiRIL277	31.454	-1
epiRIL297	2.97838	1	-1	-1	1			epiRIL297	37.573	-1
epiRIL305	2.80128	1	-1	1	-1			epiRIL305	31.5024	-1
epiRIL315	2.63942	-1	-1	1	-1			epiRIL315	32.906	-1
epiRIL323	2.87861	-1	-1	1	-1			epiRIL323	31.8406	-1
epiRIL326	2.40659	-1	-1	-1	-1			epiRIL326	32.5193	-1
epiRIL333	2.37662	-1	-1	-1	1			epiRIL333	25.257	-1
epiRIL340	2.40828	-1	-1	-1	-1			epiRIL340	35.5029	-1
epiRIL344	2.34884	1	-1	-1	-1			epiRIL344	37.1206	-1
epiRIL350	3.0765	1	-1	-1	1			epiRIL350	32.9319	1
epiRIL356	3.07812	1	-1	-1	1			epiRIL356	27.8268	-1
epiRIL361	2.44086	1	-1	-1	-1			epiRIL361	30.4807	-1
epiRIL362	2.58382	-1	-1	-1	1			epiRIL362	28.5107	-1
epiRIL363	2.9418	1	-1	-1	1			epiRIL363	33.0334	1
epiRIL366	2.45729	-1	-1	-1	1			epiRIL366	34.583	-1
epiRIL368	2.49296	-1	-1	-1	-1			epiRIL368	27.0682	-1
epiRIL371	2.51381	-1	-1	-1	-1			epiRIL371	33.3213	-1
epiRIL375	2.80165	-1	-1	-1	-1			epiRIL375	28.8944	1
epiRIL391	3.13636	-1	1	1	1			epiRIL391	31.4366	-1
epiRIL393	2.36866	-1	-1	-1	-1			epiRIL393	38.3653	-1
epiRIL394	1.96571	-1	-1	1	-1			epiRIL394	23.3851	1
epiRIL400	2.3066	-1	-1	-1	-1			epiRIL400	35.1623	-1
epiRIL408	2.29798	-1	-1	-1	-1			epiRIL408	37.8344	-1
epiRIL410	2.35745	-1	-1	-1	-1			epiRIL410	37.0964	-1
epiRIL425	2.85116	1	-1	-1	1			epiRIL425	39.5476	1
epiRIL432	2.97768	1	1	-1	-1			epiRIL432	32.5842	1
epiRIL434	2.35887	-1	-1	-1	-1			epiRIL434	33.1045	-1
epiRIL437	2.69604	1	-1	1	-1			epiRIL437	38.6601	-1
epiRIL438	3.03791	1	1	1	1			epiRIL438	32.9471	-1
epiRIL439	2.46957	-1	-1	-1	-1			epiRIL439	38.2399	-1
epiRIL454	3.31944	-1	-1	1	1			epiRIL454	28.291	-1
epiRIL458	2.58333	-1	-1	-1	1			epiRIL458	50.1447	-1
epiRIL466	2.73214	1	1	-1	-1			epiRIL466	29.8962	-1
epiRIL467	2.75877	1	-1	-1	1			epiRIL467	40.9936	1
epiRIL471	2.40807	-1	-1	-1	1			epiRIL471	36.6578	-1
epiRIL473	2.36444	-1	-1	-1	-1			epiRIL473	37.858	-1
epiRIL477	2.53138	-1	1	-1	-1			epiRIL477	36.9946	-1
epiRIL480	2.35119	-1	-1	-1	-1			epiRIL480	39.796	-1
epiRIL488	2.80328	1	-1	-1	1			epiRIL488	34.7707	-1
epiRIL492	2.72512	1	-1	-1	1			epiRIL492	41.8526	1
epiRIL493	2.32692	-1	-1	-1	-1			epiRIL493	35.6117	-1
epiRIL494	2.56923	1	-1	-1	-1			epiRIL494	36.0493	-1
epiRIL495	2.34842	-1	-1	-1	-1			epiRIL495	46.3327	-1
epiRIL497	2.31507	-1	-1	-1	-1			epiRIL497	36.4668	-1
epiRIL500	2.68889	1	-1	1	-1			epiRIL500	34.1305	1
epiRIL503	2.70526	1	-1	-1	-1			epiRIL503	37.2753	-1
epiRIL506	2.48511	-1	-1	-1	-1			epiRIL506	29.4274	-1
epiRIL508	3.35802	1	1	1	-1			epiRIL508	34.8889	1
epiRIL523	2.65368	-1	-1	1	-1			epiRIL523	40.267	-1
epiRIL538	2.4	-1	-1	-1	-1			epiRIL538	34.5193	-1
epiRIL539	2.47059	-1	-1	-1	-1			epiRIL539	34.9115	-1
epiRIL556	3.17273	-1	-1	1	1			epiRIL556	36.6413	-1
epiRIL558	2.51707	-1	1	-1	-1			epiRIL558	35.4773	-1
epiRIL559	2.63393	-1	-1	-1	-1			epiRIL559	35.6819	-1
epiRIL561	2.36493	-1	-1	-1	1			epiRIL561	37.9057	-1
epiRIL567	3.10798	1	1	-1	-1			epiRIL567	35.0578	1
epiRIL570	2.40097	-1	-1	-1	-1			epiRIL570	35.5162	-1
epiRIL572	2.52299	-1	1	-1	-1			epiRIL572	33.8823	-1
epiRIL573	2.48069	-1	-1	-1	-1			epiRIL573	30.2423	-1
epiRIL579	2.97233	-1	-1	-1	-1			epiRIL579	27.6172	1

## Sheet: Figure 1d
Figure 1d: Percentages of resistance variance explained by the peak DMR markers, including covariance between markers (orange)
QTL1	0.0888
QTL2	0.1655
QTL4	0.0719
QTL5	0.0688
covariance	0.205
all QTLs (including covariance)	0.6
