# Supplementary material for: Identification and characterisation of hypomethylated DNA loci controlling quantitative resistance in Arabidopsis
Source: eLife. 2019 Jan 4;8:e40655. doi: 10.7554/eLife.40655 (PMC6342528; doi:10.7554/eLife.40655)
Supplement: Figure 2—source data 1. [file elife-40655-fig2-data1.xlsx]

## Sheet: Figure 2a
Figure 2a: Defence marker phenotypes of the four Hpa-resistant epiRILs carrying different combiations of epiQTL haplotypes.
Relative expression values of SA-dependent PR1, normalized to the average expression values of three constitutively exressed genes (At1G13440, At5G25760 and At2G28390):
	Wt (602)		148		193		454		508
Replicate	Mock	Hpa	Mock	Hpa	Mock	Hpa	Mock	Hpa	Mock	Hpa
I	0.391149	104.471	1.44441	388.942	0.658831	290.426	0.283521	158.934	0.480677	170.424
II	0.433329	50.7097	0.175571	176.448	0.818296	424.27	1.00984	103.903	0.878361	341.696
III	0.265123	105.697	0.228743	252.415	0.731293	215.013	1.81614	152.263	0.189753	535.762
Percentage of callose-arrested and non-arrested conidiospores of Hpa at 48 hpi:
Wt (602)		148		193		454		508
Blocked	Unblocked	Blocked	Unblocked	Blocked	Unblocked	Blocked	Unblocked	Blocked	Unblocked
129	204	92	82	87	103	98	75	148	121

## Sheet: Figure 2b
Figure 2b: Principal component analysis of 27,641 genes at 48 and 72 hpi with Hpa or water (Mock).
Line	Treatment	Time point	Replicate	PC1	PC2
Wt (602)	Mock	48hpi	I	69.6499	-3.11388
Wt (602)	Mock	48hpi	II	73.7717	-4.17621
Wt (602)	Mock	48hpi	II	71.4546	-3.38212
Wt (602)	Mock	72hpi	I	70.1696	-4.26715
Wt (602)	Mock	72hpi	II	67.1705	-4.6781
Wt (602)	Mock	72hpi	II	64.9404	-4.09499
Wt (602)	Hpa	48hpi	I	25.3017	16.2404
Wt (602)	Hpa	48hpi	II	25.996	15.2312
Wt (602)	Hpa	48hpi	II	27.138	15.9467
Wt (602)	Hpa	72hpi	I	-14.8445	27.0882
Wt (602)	Hpa	72hpi	II	-21.5203	32.0542
Wt (602)	Hpa	72hpi	II	-25.0685	32.5067
148	Mock	48hpi	I	27.4226	-48.4082
148	Mock	48hpi	II	-8.73518	-35.7702
148	Mock	48hpi	II	19.9547	-44.059
148	Mock	72hpi	I	29.1882	-47.7017
148	Mock	72hpi	II	24.7775	-46.0325
148	Mock	72hpi	II	31.3536	-47.8702
148	Hpa	48hpi	I	-33.2222	-22.2853
148	Hpa	48hpi	II	-32.6971	-17.4714
148	Hpa	48hpi	II	-33.1596	-18.6587
148	Hpa	72hpi	I	-57.5333	-15.6088
148	Hpa	72hpi	II	-51.3125	-16.4841
148	Hpa	72hpi	II	-56.8135	-10.4441
193	Mock	48hpi	I	29.1965	-23.1176
193	Mock	48hpi	II	23.2786	-21.166
193	Mock	48hpi	II	15.5261	-17.2879
193	Mock	72hpi	I	21.1324	-20.6343
193	Mock	72hpi	II	27.7278	-22.1362
193	Mock	72hpi	II	28.0423	-22.0584
193	Hpa	48hpi	I	-35.6962	3.87157
193	Hpa	48hpi	II	-39.1669	4.99044
193	Hpa	48hpi	II	-22.9585	-0.105734
193	Hpa	72hpi	I	-43.8424	5.90031
193	Hpa	72hpi	II	-62.8197	13.1428
193	Hpa	72hpi	II	-47.2775	8.34614
454	Mock	48hpi	I	32.1111	50.4058
454	Mock	48hpi	II	46.1537	47.5211
454	Mock	48hpi	II	47.7698	45.3407
454	Mock	72hpi	I	54.1744	42.1156
454	Mock	72hpi	II	48.4699	45.3727
454	Mock	72hpi	II	44.7794	45.7693
454	Hpa	48hpi	I	-7.76252	72.6101
454	Hpa	48hpi	II	-17.7086	75.8566
454	Hpa	48hpi	II	-8.95015	71.9003
454	Hpa	72hpi	I	-34.5153	77.49
454	Hpa	72hpi	II	-19.9154	75.3125
454	Hpa	72hpi	II	-20.3036	74.7563
508	Mock	48hpi	I	4.89817	-44.4956
508	Mock	48hpi	II	-3.98246	-42.7229
508	Mock	48hpi	II	7.49145	-45.6341
508	Mock	72hpi	I	12.0948	-48.4634
508	Mock	72hpi	II	8.79094	-46.0299
508	Mock	72hpi	II	14.3043	-48.8263
508	Hpa	48hpi	I	-59.8718	-21.0791
508	Hpa	48hpi	II	-60.8119	-17.7522
508	Hpa	48hpi	II	-63.5167	-16.2978
508	Hpa	72hpi	I	-71.241	-15.8117
508	Hpa	72hpi	II	-69.2888	-16.2335
508	Hpa	72hpi	II	-69.695	-15.4105

## Sheet: Figure 2c
Figure 2c: Numbers of Hpa-inducible genes showing constitutive up-regulation or augmented induction in Hpa-resistant epiRILs at 48 or 72 hpi.
Selection	Group 1														Group 2
line/group	148		193		454		508		Shared		Total				148		193		454		508		Shared		Total
Time point	48hpi	72hpi	48hpi	72hpi	48hpi	72hpi	48hpi	72hpi	48hpi	72hpi	48hpi	72hpi			48hpi	72hpi	48hpi	72hpi	48hpi	72hpi	48hpi	72hpi	48hpi	72hpi	48hpi	72hpi
Total number	928	682	739	643	866	721	839	771	172	165	1695	1378			2284	934	2480	1007	2699	1191	3503	1661	1299	288	4571	2674
gene annotations	AT1G01480	AT1G01140	AT1G01170	AT1G02440	AT1G01220	AT1G01160	AT1G01170	AT1G01160	AT1G01480	AT2G23780	AT1G01170	AT1G01140			AT1G01170	AT1G01180	AT1G01180	AT1G01180	AT1G01170	AT1G01180	AT1G01180	AT1G01180	AT1G50430	AT5G18170	AT1G01170	AT1G01180
	AT1G01730	AT1G01230	AT1G01190	AT1G02780	AT1G01480	AT1G01220	AT1G01480	AT1G01220	AT1G02220	AT4G27410	AT1G01190	AT1G01160			AT1G01180	AT1G01240	AT1G01240	AT1G01240	AT1G01180	AT1G01240	AT1G01230	AT1G01240	AT5G07360	AT3G50700	AT1G01180	AT1G01240
	AT1G02130	AT1G01690	AT1G01480	AT1G03000	AT1G02220	AT1G01690	AT1G02130	AT1G01670	AT1G02780	AT5G13220	AT1G01220	AT1G01220			AT1G01240	AT1G01650	AT1G01340	AT1G02300	AT1G01230	AT1G01440	AT1G01240	AT1G01440	AT3G18370	AT5G49650	AT1G01230	AT1G01440
	AT1G02220	AT1G02370	AT1G02220	AT1G05700	AT1G02430	AT1G01910	AT1G02220	AT1G01690	AT1G07610	AT4G38390	AT1G01480	AT1G01230			AT1G01340	AT1G01960	AT1G01440	AT1G02610	AT1G01240	AT1G01770	AT1G01260	AT1G02300	AT5G20050	AT3G48530	AT1G01240	AT1G01650
	AT1G02270	AT1G02400	AT1G02780	AT1G06060	AT1G02780	AT1G02080	AT1G02370	AT1G01770	AT1G08040	AT3G12200	AT1G01730	AT1G01670			AT1G01440	AT1G02170	AT1G01550	AT1G02660	AT1G01260	AT1G01920	AT1G01340	AT1G02305	AT3G50700	AT1G32700	AT1G01260	AT1G01770
	AT1G02400	AT1G02740	AT1G03130	AT1G06400	AT1G03130	AT1G02520	AT1G02400	AT1G02080	AT1G10095	AT4G09560	AT1G02130	AT1G01690			AT1G01448	AT1G02300	AT1G01560	AT1G03090	AT1G01340	AT1G02300	AT1G01440	AT1G02360	AT4G02740	AT1G23840	AT1G01340	AT1G01920
	AT1G02780	AT1G02780	AT1G03330	AT1G07200	AT1G03220	AT1G02740	AT1G02780	AT1G02780	AT1G12050	AT1G72660	AT1G02220	AT1G01770			AT1G01560	AT1G02610	AT1G01820	AT1G03140	AT1G01448	AT1G02305	AT1G01550	AT1G02370	AT1G35710	AT2G26560	AT1G01440	AT1G01960
	AT1G02850	AT1G03000	AT1G03970	AT1G07210	AT1G03330	AT1G02780	AT1G03030	AT1G03000	AT1G16370	AT5G46210	AT1G02270	AT1G01910			AT1G01680	AT1G02620	AT1G01940	AT1G03475	AT1G01490	AT1G02370	AT1G01560	AT1G02610	AT1G53710	AT3G05200	AT1G01448	AT1G02170
	AT1G03220	AT1G03950	AT1G04820	AT1G07700	AT1G03590	AT1G03000	AT1G03130	AT1G03140	AT1G18190	AT4G26640	AT1G02370	AT1G02080			AT1G01820	AT1G02660	AT1G02170	AT1G03590	AT1G01550	AT1G02560	AT1G01680	AT1G02660	AT1G71390	AT2G37678	AT1G01490	AT1G02300
	AT1G03750	AT1G04490	AT1G05060	AT1G08040	AT1G03680	AT1G03220	AT1G03220	AT1G03220	AT1G19220	AT5G02220	AT1G02400	AT1G02370			AT1G02170	AT1G03060	AT1G02230	AT1G03760	AT1G01560	AT1G02610	AT1G01730	AT1G03060	AT4G26090	AT3G10250	AT1G01550	AT1G02305
	AT1G03820	AT1G05270	AT1G05310	AT1G08465	AT1G03820	AT1G03310	AT1G03330	AT1G03590	AT1G19870	AT2G44850	AT1G02430	AT1G02400			AT1G02230	AT1G03140	AT1G02360	AT1G03850	AT1G01770	AT1G02620	AT1G01820	AT1G03370	AT1G79700	AT1G26580	AT1G01560	AT1G02360
	AT1G03970	AT1G05500	AT1G05620	AT1G08530	AT1G03850	AT1G04010	AT1G03590	AT1G03770	AT1G21480	AT1G66173	AT1G02780	AT1G02440			AT1G02300	AT1G03220	AT1G02400	AT1G03860	AT1G01820	AT1G02660	AT1G01960	AT1G03475	AT2G46620	AT2G31060	AT1G01680	AT1G02370
	AT1G04820	AT1G05560	AT1G05880	AT1G09850	AT1G04310	AT1G05270	AT1G03820	AT1G05500	AT1G22410	AT3G49340	AT1G02850	AT1G02520			AT1G02360	AT1G03230	AT1G02450	AT1G04200	AT1G01960	AT1G03140	AT1G02100	AT1G03580	AT3G44400	AT3G18350	AT1G01730	AT1G02560
	AT1G05310	AT1G05640	AT1G06460	AT1G10560	AT1G05220	AT1G05500	AT1G03970	AT1G05640	AT1G22640	AT3G21420	AT1G03030	AT1G02740			AT1G02450	AT1G03475	AT1G02610	AT1G04280	AT1G02170	AT1G03230	AT1G02120	AT1G03850	AT1G26670	AT5G57700	AT1G01770	AT1G02610
	AT1G05950	AT1G05700	AT1G07610	AT1G11125	AT1G05620	AT1G05640	AT1G04310	AT1G05700	AT1G23000	AT3G07350	AT1G03130	AT1G02780			AT1G02520	AT1G03580	AT1G02620	AT1G04400	AT1G02300	AT1G03475	AT1G02170	AT1G03970	AT1G23840	AT1G80920	AT1G01820	AT1G02620
	AT1G06460	AT1G05950	AT1G07705	AT1G11880	AT1G06110	AT1G05680	AT1G04820	AT1G06060	AT1G26300	AT1G03000	AT1G03220	AT1G03000			AT1G02610	AT1G03590	AT1G02660	AT1G04410	AT1G02305	AT1G03580	AT1G02230	AT1G04200	AT1G52200	AT4G19420	AT1G01940	AT1G02660
	AT1G06620	AT1G06002	AT1G07890	AT1G12050	AT1G06620	AT1G05700	AT1G05060	AT1G06400	AT1G26558	AT3G23080	AT1G03330	AT1G03140			AT1G02620	AT1G03610	AT1G02920	AT1G04440	AT1G02360	AT1G03620	AT1G02260	AT1G04260	AT3G05200	AT1G08900	AT1G01960	AT1G03060
	AT1G06645	AT1G06060	AT1G07900	AT1G12780	AT1G07210	AT1G06110	AT1G05310	AT1G06510	AT1G27150	AT3G12300	AT1G03590	AT1G03220			AT1G02660	AT1G03850	AT1G02930	AT1G04750	AT1G02400	AT1G03760	AT1G02300	AT1G04280	AT1G26380	AT5G15860	AT1G02100	AT1G03090
	AT1G07040	AT1G06400	AT1G08040	AT1G13190	AT1G07610	AT1G06400	AT1G05620	AT1G06645	AT1G27210	AT5G41880	AT1G03680	AT1G03310			AT1G02920	AT1G03860	AT1G03030	AT1G04810	AT1G02560	AT1G03850	AT1G02360	AT1G04400	AT2G37678	AT1G21610	AT1G02120	AT1G03140
	AT1G07610	AT1G06645	AT1G08090	AT1G13450	AT1G07670	AT1G06645	AT1G05700	AT1G07200	AT1G29390	AT2G43400	AT1G03750	AT1G03590			AT1G02930	AT1G04200	AT1G03140	AT1G04850	AT1G02610	AT1G03970	AT1G02430	AT1G04440	AT5G44790	AT3G19290	AT1G02170	AT1G03220
	AT1G07620	AT1G07200	AT1G08530	AT1G13700	AT1G07705	AT1G07230	AT1G06460	AT1G07210	AT1G29465	AT4G02390	AT1G03820	AT1G03770			AT1G03030	AT1G04260	AT1G03210	AT1G05500	AT1G02620	AT1G04200	AT1G02440	AT1G04790	AT2G39100	AT5G64240	AT1G02230	AT1G03230
	AT1G07750	AT1G07530	AT1G09530	AT1G13800	AT1G08040	AT1G07530	AT1G06620	AT1G07230	AT1G31880	AT3G52860	AT1G03850	AT1G03950			AT1G03140	AT1G04400	AT1G03220	AT1G05720	AT1G02660	AT1G04280	AT1G02450	AT1G04810	AT2G41420	AT2G46550	AT1G02260	AT1G03370
	AT1G07890	AT1G07700	AT1G09690	AT1G14205	AT1G08660	AT1G07590	AT1G06645	AT1G07530	AT1G32928	AT4G02500	AT1G03970	AT1G04010			AT1G03210	AT1G04410	AT1G03230	AT1G05805	AT1G02670	AT1G04400	AT1G02610	AT1G05120	AT1G68100	AT2G35680	AT1G02300	AT1G03475
	AT1G07900	AT1G07870	AT1G09920	AT1G14260	AT1G09050	AT1G08040	AT1G07610	AT1G07700	AT1G47710	AT1G55760	AT1G04310	AT1G04490			AT1G03230	AT1G04440	AT1G03290	AT1G05840	AT1G02850	AT1G04410	AT1G02660	AT1G05340	AT4G31950	AT5G05100	AT1G02305	AT1G03580
	AT1G08040	AT1G08040	AT1G10095	AT1G14510	AT1G09080	AT1G08180	AT1G07890	AT1G08040	AT1G52910	AT2G39750	AT1G04820	AT1G05270			AT1G03290	AT1G04810	AT1G03370	AT1G05890	AT1G02900	AT1G04440	AT1G02920	AT1G05570	AT3G26020	AT1G20840	AT1G02360	AT1G03590
	AT1G08940	AT1G08180	AT1G10690	AT1G14530	AT1G09390	AT1G08700	AT1G08040	AT1G08465	AT1G55760	AT2G39110	AT1G05060	AT1G05500			AT1G03330	AT1G05750	AT1G03400	AT1G06080	AT1G03140	AT1G04600	AT1G02930	AT1G05720	AT4G28490	AT3G47800	AT1G02400	AT1G03610
	AT1G09920	AT1G08465	AT1G11020	AT1G14690	AT1G09530	AT1G09200	AT1G08660	AT1G10350	AT1G56230	AT1G76260	AT1G05220	AT1G05560			AT1G03370	AT1G05805	AT1G03580	AT1G06110	AT1G03230	AT1G04780	AT1G03060	AT1G05790	AT1G74680	AT5G56870	AT1G02430	AT1G03620
	AT1G10095	AT1G09850	AT1G11755	AT1G14830	AT1G09690	AT1G10350	AT1G09200	AT1G11880	AT1G61240	AT4G31410	AT1G05310	AT1G05640			AT1G03400	AT1G05890	AT1G03590	AT1G06130	AT1G03290	AT1G04850	AT1G03140	AT1G05805	AT5G44585	AT1G60140	AT1G02440	AT1G03760
	AT1G10690	AT1G10150	AT1G11890	AT1G14890	AT1G09920	AT1G10690	AT1G09530	AT1G11910	AT1G61520	AT4G29310	AT1G05620	AT1G05680			AT1G03430	AT1G06130	AT1G03610	AT1G07470	AT1G03370	AT1G05790	AT1G03210	AT1G05840	AT2G38860	AT4G05150	AT1G02450	AT1G03850
	AT1G10700	AT1G10350	AT1G12050	AT1G14980	AT1G10095	AT1G11125	AT1G09690	AT1G12050	AT1G66173	AT1G65000	AT1G05700	AT1G05700			AT1G03580	AT1G07920	AT1G03730	AT1G07820	AT1G03400	AT1G05805	AT1G03230	AT1G05890	AT1G61460	AT5G20660	AT1G02520	AT1G03860
	AT1G10760	AT1G10865	AT1G12790	AT1G14990	AT1G10590	AT1G11880	AT1G10095	AT1G12680	AT1G66580	AT3G63210	AT1G05880	AT1G05950			AT1G03590	AT1G07930	AT1G03740	AT1G07920	AT1G03580	AT1G05840	AT1G03290	AT1G05950	AT4G19420	AT5G01980	AT1G02560	AT1G03970
	AT1G10865	AT1G11125	AT1G12910	AT1G15175	AT1G11050	AT1G12000	AT1G10760	AT1G12780	AT1G70350	AT5G07890	AT1G05950	AT1G06002			AT1G03610	AT1G07940	AT1G03760	AT1G07930	AT1G03650	AT1G05890	AT1G03370	AT1G06110	AT4G39820	AT4G28270	AT1G02610	AT1G04200
	AT1G11050	AT1G12680	AT1G13260	AT1G15350	AT1G11755	AT1G12050	AT1G11020	AT1G12910	AT1G70940	AT5G54540	AT1G06110	AT1G06060			AT1G03620	AT1G08900	AT1G03850	AT1G08480	AT1G03730	AT1G06060	AT1G03400	AT1G06130	AT3G59570	AT5G25265	AT1G02620	AT1G04260
	AT1G11840	AT1G13800	AT1G13270	AT1G16150	AT1G11840	AT1G12140	AT1G11050	AT1G13090	AT1G71310	AT3G21060	AT1G06460	AT1G06110			AT1G03660	AT1G09010	AT1G03860	AT1G08700	AT1G03740	AT1G06130	AT1G03430	AT1G07020	AT4G27260	AT2G45030	AT1G02660	AT1G04280
	AT1G12050	AT1G13860	AT1G14250	AT1G16270	AT1G12050	AT1G12680	AT1G11880	AT1G13190	AT1G71890	AT5G39720	AT1G06620	AT1G06400			AT1G03730	AT1G09280	AT1G03900	AT1G08720	AT1G03750	AT1G06500	AT1G03475	AT1G07220	AT4G28300	AT5G42870	AT1G02670	AT1G04400
	AT1G12400	AT1G14130	AT1G15580	AT1G17230	AT1G12790	AT1G13190	AT1G11940	AT1G13450	AT1G74370	AT3G18140	AT1G06645	AT1G06510			AT1G03740	AT1G09590	AT1G04200	AT1G08900	AT1G03900	AT1G07170	AT1G03580	AT1G07470	AT5G20250	AT5G58720	AT1G02850	AT1G04410
	AT1G12845	AT1G14205	AT1G16370	AT1G17440	AT1G12845	AT1G13570	AT1G12050	AT1G13570	AT1G74940	AT1G28540	AT1G07040	AT1G06645			AT1G03850	AT1G09690	AT1G04280	AT1G09010	AT1G03970	AT1G07210	AT1G03650	AT1G07650	AT1G27180	AT3G15070	AT1G02900	AT1G04440
	AT1G13340	AT1G14260	AT1G16810	AT1G18350	AT1G12970	AT1G13940	AT1G12400	AT1G13800	AT1G76660	AT4G27710	AT1G07210	AT1G07200			AT1G03860	AT1G09940	AT1G04400	AT1G09050	AT1G04030	AT1G07380	AT1G03660	AT1G07820	AT2G38290	AT5G46710	AT1G02920	AT1G04600
	AT1G14000	AT1G14570	AT1G17970	AT1G18540	AT1G13260	AT1G14205	AT1G12790	AT1G13940	AT1G78380	AT5G60680	AT1G07610	AT1G07210			AT1G03900	AT1G10130	AT1G04410	AT1G09060	AT1G04280	AT1G07615	AT1G03730	AT1G07920	AT5G03700	AT5G45490	AT1G02930	AT1G04750
	AT1G14230	AT1G14690	AT1G18190	AT1G19000	AT1G13700	AT1G14340	AT1G12845	AT1G14140	AT1G79610	AT1G68920	AT1G07620	AT1G07230			AT1G04280	AT1G10140	AT1G04440	AT1G09415	AT1G04400	AT1G08460	AT1G03740	AT1G07940	AT2G03530	AT5G43320	AT1G03030	AT1G04780
	AT1G14250	AT1G14830	AT1G18400	AT1G19220	AT1G14250	AT1G14400	AT1G13700	AT1G14205	AT1G80110	AT1G62430	AT1G07670	AT1G07530			AT1G04400	AT1G10170	AT1G04750	AT1G09940	AT1G04410	AT1G08630	AT1G03750	AT1G07990	AT2G14120	AT2G31800	AT1G03060	AT1G04790
	AT1G14870	AT1G14980	AT1G18540	AT1G19770	AT1G14620	AT1G14510	AT1G14580	AT1G14510	AT1G80400	AT2G38010	AT1G07705	AT1G07590			AT1G04410	AT1G10200	AT1G04780	AT1G10140	AT1G04440	AT1G08660	AT1G03760	AT1G08350	AT5G15860	AT5G61590	AT1G03140	AT1G04810
	AT1G14980	AT1G15010	AT1G18640	AT1G21480	AT1G15175	AT1G14530	AT1G14620	AT1G14530	AT1G80440	AT3G47850	AT1G07750	AT1G07700			AT1G04440	AT1G10630	AT1G04810	AT1G10170	AT1G04555	AT1G08720	AT1G03850	AT1G08450	AT1G65980	AT3G43520	AT1G03210	AT1G04850
	AT1G15580	AT1G15175	AT1G18700	AT1G21590	AT1G16000	AT1G14570	AT1G15175	AT1G14570	AT1G80720	AT1G55000	AT1G07890	AT1G07870			AT1G04555	AT1G10700	AT1G04980	AT1G10630	AT1G04750	AT1G08890	AT1G03860	AT1G08460	AT3G15040	AT1G12440	AT1G03220	AT1G05120
	AT1G16370	AT1G15310	AT1G19120	AT1G21760	AT1G16370	AT1G14690	AT1G16370	AT1G14690	AT2G01420	AT1G61000	AT1G07900	AT1G08040			AT1G04690	AT1G11360	AT1G05010	AT1G10700	AT1G04780	AT1G08900	AT1G03900	AT1G08700	AT5G40910	AT1G01180	AT1G03230	AT1G05340
	AT1G16810	AT1G15350	AT1G19180	AT1G21830	AT1G17160	AT1G14890	AT1G17860	AT1G14830	AT2G02540	AT5G07810	AT1G08040	AT1G08180			AT1G04750	AT1G11480	AT1G05180	AT1G12000	AT1G04810	AT1G09010	AT1G03950	AT1G08720	AT3G12360	AT4G25940	AT1G03290	AT1G05500
	AT1G17145	AT1G15370	AT1G19220	AT1G21920	AT1G17970	AT1G15175	AT1G17970	AT1G15010	AT2G17780	AT4G22310	AT1G08090	AT1G08465			AT1G04980	AT1G12000	AT1G05340	AT1G12210	AT1G04970	AT1G09080	AT1G04140	AT1G08890	AT2G38410	AT4G03560	AT1G03330	AT1G05570
	AT1G17745	AT1G15580	AT1G19870	AT1G22370	AT1G18030	AT1G15310	AT1G18030	AT1G15175	AT2G18010	AT4G27760	AT1G08530	AT1G08530			AT1G05010	AT1G12013	AT1G05350	AT1G12220	AT1G05180	AT1G09280	AT1G04200	AT1G08900	AT3G11270	AT5G38710	AT1G03370	AT1G05720
	AT1G17860	AT1G15810	AT1G20020	AT1G22640	AT1G18190	AT1G16270	AT1G18190	AT1G15310	AT2G18040	AT1G08040	AT1G08660	AT1G08700			AT1G05180	AT1G12220	AT1G05570	AT1G12360	AT1G05300	AT1G09300	AT1G04260	AT1G09010	AT5G18640	AT4G24040	AT1G03400	AT1G05750
	AT1G18190	AT1G15860	AT1G21440	AT1G22790	AT1G18580	AT1G16810	AT1G18500	AT1G15350	AT2G20360	AT4G38825	AT1G08940	AT1G09200			AT1G05340	AT1G12440	AT1G05575	AT1G12440	AT1G05310	AT1G09415	AT1G04280	AT1G09050	AT1G10050	AT5G13010	AT1G03430	AT1G05790
	AT1G18500	AT1G16810	AT1G21480	AT1G23052	AT1G18620	AT1G17440	AT1G18580	AT1G15780	AT2G20990	AT1G79590	AT1G09050	AT1G09850			AT1G05575	AT1G12780	AT1G05675	AT1G12680	AT1G05320	AT1G09480	AT1G04400	AT1G09195	AT2G41835	AT2G02710	AT1G03475	AT1G05805
	AT1G19120	AT1G17230	AT1G22370	AT1G23080	AT1G18640	AT1G17580	AT1G18620	AT1G15810	AT2G24755	AT5G45840	AT1G09080	AT1G10150			AT1G05675	AT1G12840	AT1G05790	AT1G12840	AT1G05340	AT1G09680	AT1G04410	AT1G09415	AT4G15417	AT1G77210	AT1G03580	AT1G05840
	AT1G19180	AT1G17280	AT1G22410	AT1G23170	AT1G19220	AT1G17640	AT1G18640	AT1G16270	AT2G26710	AT2G46490	AT1G09200	AT1G10350			AT1G05805	AT1G12910	AT1G05805	AT1G12910	AT1G05570	AT1G09910	AT1G04440	AT1G09645	AT3G09830	AT5G63620	AT1G03590	AT1G05890
	AT1G19220	AT1G17490	AT1G22640	AT1G26800	AT1G19670	AT1G18190	AT1G18700	AT1G16810	AT2G27330	AT5G64160	AT1G09390	AT1G10560			AT1G06050	AT1G12970	AT1G05840	AT1G12970	AT1G05575	AT1G10170	AT1G04555	AT1G09680	AT5G52750	AT5G62460	AT1G03610	AT1G05950
	AT1G19380	AT1G17640	AT1G23000	AT1G26840	AT1G19870	AT1G18540	AT1G19180	AT1G17230	AT2G28370	AT3G29670	AT1G09530	AT1G10690			AT1G06060	AT1G13060	AT1G06130	AT1G13060	AT1G05675	AT1G10200	AT1G04600	AT1G09940	AT1G30640	AT2G03760	AT1G03620	AT1G06060
	AT1G19870	AT1G17930	AT1G23052	AT1G26900	AT1G20020	AT1G18640	AT1G19220	AT1G17280	AT2G29680	AT1G05700	AT1G09690	AT1G10865			AT1G06110	AT1G13190	AT1G06160	AT1G13180	AT1G05720	AT1G10560	AT1G04690	AT1G10130	AT2G45910	AT5G63190	AT1G03650	AT1G06080
	AT1G19910	AT1G17970	AT1G23060	AT1G27290	AT1G20200	AT1G19000	AT1G19380	AT1G17440	AT2G30920	AT5G60370	AT1G09920	AT1G11125			AT1G06130	AT1G13260	AT1G06630	AT1G13260	AT1G05790	AT1G11300	AT1G04750	AT1G10140	AT1G26440	AT5G61260	AT1G03660	AT1G06110
	AT1G20510	AT1G18350	AT1G23390	AT1G27300	AT1G21050	AT1G19170	AT1G19770	AT1G17490	AT2G32020	AT4G02540	AT1G10095	AT1G11880			AT1G06290	AT1G13450	AT1G06840	AT1G13970	AT1G05805	AT1G11350	AT1G04780	AT1G10170	AT1G08820	AT5G62530	AT1G03730	AT1G06130
	AT1G20880	AT1G18470	AT1G23710	AT1G27385	AT1G21326	AT1G19770	AT1G19870	AT1G17580	AT2G32170	AT3G59940	AT1G10590	AT1G11910			AT1G06630	AT1G13700	AT1G07000	AT1G13980	AT1G05840	AT1G11360	AT1G04810	AT1G10200	AT3G12910	AT1G32120	AT1G03740	AT1G06500
	AT1G21310	AT1G18540	AT1G23850	AT1G27840	AT1G21440	AT1G20110	AT1G20510	AT1G17640	AT2G34480	AT1G63000	AT1G10690	AT1G12000			AT1G06840	AT1G14320	AT1G07020	AT1G14140	AT1G05970	AT1G11475	AT1G04980	AT1G10210	AT5G46630	AT2G38000	AT1G03750	AT1G07020
	AT1G21480	AT1G19000	AT1G26300	AT1G28540	AT1G21480	AT1G20160	AT1G20880	AT1G17970	AT2G36080	AT3G05510	AT1G10700	AT1G12050			AT1G06870	AT1G14400	AT1G07040	AT1G14300	AT1G06130	AT1G11480	AT1G05010	AT1G10560	AT1G72330	AT2G37160	AT1G03760	AT1G07170
	AT1G22410	AT1G19170	AT1G26558	AT1G29550	AT1G21500	AT1G21480	AT1G21326	AT1G18190	AT2G36780	AT1G77450	AT1G10760	AT1G12140			AT1G07000	AT1G14670	AT1G07128	AT1G14320	AT1G06160	AT1G11610	AT1G05020	AT1G10690	AT4G36150	AT3G57520	AT1G03850	AT1G07210
	AT1G22640	AT1G19220	AT1G26840	AT1G29850	AT1G21830	AT1G21590	AT1G21440	AT1G18350	AT2G38170	AT1G18540	AT1G10865	AT1G12680			AT1G07020	AT1G14860	AT1G07160	AT1G14400	AT1G06290	AT1G12160	AT1G05120	AT1G11300	AT3G54300	AT1G47310	AT1G03860	AT1G07220
	AT1G23000	AT1G19290	AT1G27150	AT1G30200	AT1G21840	AT1G21700	AT1G21480	AT1G18540	AT2G38530	AT3G22425	AT1G11020	AT1G12780			AT1G07128	AT1G14890	AT1G07170	AT1G14570	AT1G06630	AT1G12220	AT1G05180	AT1G11310	AT5G25260	AT3G62550	AT1G03900	AT1G07380
	AT1G23060	AT1G19380	AT1G27210	AT1G31340	AT1G22370	AT1G21830	AT1G21830	AT1G19170	AT2G38580	AT2G39700	AT1G11050	AT1G12910			AT1G07160	AT1G15020	AT1G07520	AT1G14620	AT1G06760	AT1G12360	AT1G05300	AT1G11360	AT3G47800	AT5G53550	AT1G03950	AT1G07470
	AT1G23190	AT1G19397	AT1G27290	AT1G32170	AT1G22410	AT1G22370	AT1G21840	AT1G19290	AT2G38820	AT5G18290	AT1G11755	AT1G13090			AT1G07170	AT1G15530	AT1G07630	AT1G14670	AT1G06840	AT1G12440	AT1G05340	AT1G11475	AT1G66880	AT1G70420	AT1G03970	AT1G07615
	AT1G23850	AT1G19670	AT1G27435	AT1G32270	AT1G22640	AT1G22640	AT1G22370	AT1G19300	AT2G39410	AT5G42860	AT1G11840	AT1G13190			AT1G07230	AT1G15670	AT1G07670	AT1G14860	AT1G07000	AT1G12780	AT1G05350	AT1G11480	AT5G56870	AT1G58200	AT1G04030	AT1G07650
	AT1G24140	AT1G20225	AT1G27730	AT1G33250	AT1G23000	AT1G22790	AT1G22410	AT1G19397	AT2G39650	AT5G10440	AT1G11880	AT1G13450			AT1G07520	AT1G15740	AT1G07728	AT1G15020	AT1G07020	AT1G12840	AT1G05520	AT1G12210	AT1G51790	AT3G01080	AT1G04140	AT1G07820
	AT1G25540	AT1G20350	AT1G28150	AT1G33475	AT1G23260	AT1G23390	AT1G22640	AT1G19430	AT2G39750	AT1G54580	AT1G11890	AT1G13570			AT1G08050	AT1G15880	AT1G07820	AT1G15480	AT1G07040	AT1G12910	AT1G05570	AT1G12220	AT2G31865	AT3G60190	AT1G04200	AT1G07920
	AT1G25550	AT1G20460	AT1G28370	AT1G33490	AT1G23710	AT1G25550	AT1G23000	AT1G19770	AT2G42490	AT5G63480	AT1G11940	AT1G13700			AT1G08315	AT1G15890	AT1G07990	AT1G15530	AT1G07128	AT1G12970	AT1G05575	AT1G12270	AT4G19990	AT5G27430	AT1G04260	AT1G07930
	AT1G26300	AT1G21480	AT1G29060	AT1G33610	AT1G23870	AT1G26300	AT1G23052	AT1G20110	AT2G42590	AT3G60340	AT1G12050	AT1G13800			AT1G08350	AT1G16000	AT1G08050	AT1G15670	AT1G07135	AT1G13100	AT1G05630	AT1G12290	AT2G16710	AT4G15760	AT1G04280	AT1G07940
	AT1G26390	AT1G21590	AT1G29390	AT1G33612	AT1G24090	AT1G26460	AT1G23390	AT1G20160	AT2G42640	AT1G21480	AT1G12400	AT1G13860			AT1G08450	AT1G16150	AT1G08315	AT1G15740	AT1G07140	AT1G13180	AT1G05675	AT1G12360	AT4G05150	AT1G33050	AT1G04400	AT1G07990
	AT1G26558	AT1G21700	AT1G29460	AT1G33770	AT1G25230	AT1G26840	AT1G23710	AT1G20225	AT2G42960	AT1G75440	AT1G12790	AT1G13940			AT1G08460	AT1G17147	AT1G08350	AT1G15880	AT1G07160	AT1G13210	AT1G05720	AT1G12440	AT5G20660	AT3G08650	AT1G04410	AT1G08350
	AT1G26750	AT1G21760	AT1G29465	AT1G34760	AT1G25540	AT1G27290	AT1G23870	AT1G20460	AT2G43870	AT5G24270	AT1G12845	AT1G14130			AT1G08630	AT1G17340	AT1G08450	AT1G15890	AT1G07170	AT1G13450	AT1G05750	AT1G12970	AT4G28270	AT2G28630	AT1G04440	AT1G08450
	AT1G26840	AT1G21910	AT1G29920	AT1G35670	AT1G26300	AT1G27320	AT1G24575	AT1G20760	AT2G44740	AT5G15940	AT1G12910	AT1G14140			AT1G08700	AT1G17500	AT1G08630	AT1G16000	AT1G07230	AT1G13530	AT1G05790	AT1G12990	AT1G13550	AT1G01240	AT1G04555	AT1G08460
	AT1G27150	AT1G22370	AT1G30300	AT1G36940	AT1G26460	AT1G27385	AT1G25230	AT1G21480	AT2G45600	AT3G26510	AT1G12970	AT1G14205			AT1G08720	AT1G17990	AT1G08700	AT1G16240	AT1G07380	AT1G13550	AT1G05805	AT1G13000	AT4G11170	AT2G45980	AT1G04600	AT1G08480
	AT1G27210	AT1G22640	AT1G30510	AT1G43160	AT1G26558	AT1G27840	AT1G26300	AT1G21700	AT3G01390	AT5G61440	AT1G13260	AT1G14260			AT1G08820	AT1G18390	AT1G08720	AT1G16250	AT1G07520	AT1G13700	AT1G05840	AT1G13100	AT5G01450	AT1G32928	AT1G04690	AT1G08630
	AT1G27730	AT1G22790	AT1G30630	AT1G45233	AT1G26840	AT1G28540	AT1G26460	AT1G21760	AT3G02080	AT5G04490	AT1G13270	AT1G14340			AT1G08830	AT1G18720	AT1G08820	AT1G16470	AT1G07630	AT1G13800	AT1G05890	AT1G13110	AT5G25265	AT5G11060	AT1G04750	AT1G08660
	AT1G27770	AT1G23052	AT1G30850	AT1G47128	AT1G27150	AT1G28570	AT1G26558	AT1G21830	AT3G04060	AT4G23730	AT1G13340	AT1G14400			AT1G08890	AT1G18890	AT1G08900	AT1G16560	AT1G07728	AT1G13980	AT1G05950	AT1G13180	AT1G76150	AT5G62900	AT1G04780	AT1G08700
	AT1G27930	AT1G23060	AT1G31340	AT1G47710	AT1G27210	AT1G29550	AT1G26750	AT1G21920	AT3G05420	AT2G07671	AT1G13700	AT1G14510			AT1G08900	AT1G19270	AT1G08930	AT1G18260	AT1G07810	AT1G14260	AT1G06110	AT1G13210	AT3G16700	AT2G36310	AT1G04810	AT1G08720
	AT1G27970	AT1G23080	AT1G31570	AT1G48280	AT1G27290	AT1G29750	AT1G27130	AT1G22360	AT3G06590	AT1G66480	AT1G14000	AT1G14530			AT1G08930	AT1G19310	AT1G08940	AT1G18800	AT1G07820	AT1G14380	AT1G06130	AT1G13470	AT5G45490	AT2G40110	AT1G04970	AT1G08890
	AT1G28200	AT1G23170	AT1G31880	AT1G48360	AT1G27435	AT1G30040	AT1G27150	AT1G22540	AT3G10815	AT4G32960	AT1G14230	AT1G14570			AT1G08980	AT1G19770	AT1G09050	AT1G18890	AT1G07990	AT1G14540	AT1G06160	AT1G13530	AT4G35830	AT3G26180	AT1G04980	AT1G08900
	AT1G29150	AT1G23780	AT1G32170	AT1G49130	AT1G28370	AT1G30100	AT1G27210	AT1G22640	AT3G10930	AT5G01430	AT1G14250	AT1G14690			AT1G09010	AT1G20620	AT1G09080	AT1G19660	AT1G08050	AT1G14790	AT1G06290	AT1G13550	AT2G30440	AT3G09020	AT1G05010	AT1G09010
	AT1G29260	AT1G24575	AT1G32928	AT1G49180	AT1G29260	AT1G30510	AT1G27290	AT1G22790	AT3G11570	AT4G01026	AT1G14580	AT1G14830			AT1G09050	AT1G20630	AT1G09195	AT1G20620	AT1G08315	AT1G14860	AT1G06760	AT1G13700	AT2G02930	AT4G34030	AT1G05020	AT1G09050
	AT1G29290	AT1G24625	AT1G33055	AT1G49730	AT1G29390	AT1G30820	AT1G28150	AT1G23052	AT3G13677	AT2G18650	AT1G14620	AT1G14890			AT1G09080	AT1G20840	AT1G09430	AT1G20630	AT1G08350	AT1G15010	AT1G06840	AT1G13970	AT2G13790	AT3G52240	AT1G05120	AT1G09060
	AT1G29390	AT1G25550	AT1G33120	AT1G50520	AT1G29465	AT1G31880	AT1G28370	AT1G23390	AT3G15540	AT2G31130	AT1G14870	AT1G14980			AT1G09100	AT1G20970	AT1G09560	AT1G20840	AT1G08450	AT1G15020	AT1G07000	AT1G14080	AT3G54010	AT3G26165	AT1G05180	AT1G09080
	AT1G29460	AT1G26800	AT1G33265	AT1G51140	AT1G29490	AT1G32170	AT1G29290	AT1G23780	AT3G15610	AT2G30920	AT1G14980	AT1G14990			AT1G09195	AT1G21000	AT1G09570	AT1G20970	AT1G08460	AT1G15480	AT1G07020	AT1G14170	AT2G13800	AT4G27470	AT1G05300	AT1G09195
	AT1G29465	AT1G26840	AT1G33780	AT1G51170	AT1G29690	AT1G33250	AT1G29390	AT1G26900	AT3G18140	AT3G51040	AT1G15175	AT1G15010			AT1G09280	AT1G21450	AT1G09645	AT1G21390	AT1G08630	AT1G15530	AT1G07040	AT1G14260	AT5G26751	AT5G25210	AT1G05310	AT1G09280
	AT1G29690	AT1G27385	AT1G34270	AT1G51740	AT1G29750	AT1G33475	AT1G29465	AT1G27290	AT3G18170	AT1G49130	AT1G15580	AT1G15175			AT1G09430	AT1G21580	AT1G09680	AT1G21450	AT1G08680	AT1G15670	AT1G07090	AT1G14380	AT2G31800	AT5G40720	AT1G05320	AT1G09300
	AT1G29715	AT1G27970	AT1G35612	AT1G51913	AT1G29920	AT1G33490	AT1G29690	AT1G27300	AT3G20390	AT5G54855	AT1G16000	AT1G15310			AT1G09530	AT1G21610	AT1G09730	AT1G21610	AT1G08720	AT1G15740	AT1G07128	AT1G14400	AT1G76970	AT2G24550	AT1G05340	AT1G09415
	AT1G29920	AT1G28230	AT1G44170	AT1G52260	AT1G30300	AT1G33612	AT1G29910	AT1G27320	AT3G24830	AT1G02780	AT1G16370	AT1G15350			AT1G09570	AT1G21670	AT1G09815	AT1G21670	AT1G08800	AT1G15880	AT1G07135	AT1G14520	AT4G23190	AT2G41250	AT1G05350	AT1G09480
	AT1G30510	AT1G28540	AT1G47290	AT1G52315	AT1G30510	AT1G33770	AT1G29990	AT1G27385	AT3G27310	AT1G14205	AT1G16810	AT1G15370			AT1G09575	AT1G21680	AT1G09910	AT1G21720	AT1G08820	AT1G15890	AT1G07140	AT1G14580	AT2G36420	AT5G48160	AT1G05520	AT1G09590
	AT1G30630	AT1G28570	AT1G47310	AT1G53100	AT1G30820	AT1G35320	AT1G30300	AT1G27840	AT3G27500	AT3G60410	AT1G17145	AT1G15580			AT1G09645	AT1G21720	AT1G09930	AT1G21750	AT1G08890	AT1G16000	AT1G07160	AT1G14670	AT1G35210	AT5G65110	AT1G05570	AT1G09645
	AT1G30720	AT1G29260	AT1G47550	AT1G53625	AT1G30850	AT1G36620	AT1G30820	AT1G28230	AT3G27970	AT2G03440	AT1G17160	AT1G15780			AT1G09730	AT1G21830	AT1G09940	AT1G22250	AT1G08900	AT1G16110	AT1G07170	AT1G14740	AT1G17240	AT4G17900	AT1G05575	AT1G09680
	AT1G31340	AT1G29550	AT1G47710	AT1G53920	AT1G30890	AT1G36940	AT1G30850	AT1G28250	AT3G45140	AT1G22640	AT1G17745	AT1G15810			AT1G09940	AT1G21920	AT1G09970	AT1G22500	AT1G08930	AT1G16130	AT1G07220	AT1G14790	AT1G53350	AT3G20440	AT1G05630	AT1G09690
	AT1G31570	AT1G30100	AT1G48570	AT1G54390	AT1G31010	AT1G43690	AT1G31330	AT1G28490	AT3G46320	AT1G54390	AT1G17860	AT1G15860			AT1G09970	AT1G22360	AT1G10040	AT1G22510	AT1G08980	AT1G16150	AT1G07230	AT1G14860	AT5G58940	AT4G26400	AT1G05675	AT1G09910
	AT1G31820	AT1G30200	AT1G49500	AT1G54410	AT1G31330	AT1G45233	AT1G31340	AT1G28540	AT3G47350	AT3G17820	AT1G17970	AT1G16150			AT1G10050	AT1G22500	AT1G10050	AT1G22620	AT1G09010	AT1G16240	AT1G07240	AT1G14880	AT4G25350	AT5G19140	AT1G05720	AT1G09940
	AT1G31880	AT1G30510	AT1G50010	AT1G54580	AT1G31880	AT1G47128	AT1G31570	AT1G29260	AT3G52630	AT2G46540	AT1G18030	AT1G16270			AT1G10070	AT1G22570	AT1G10070	AT1G22840	AT1G09100	AT1G16570	AT1G07520	AT1G14890	AT1G13180	AT1G80180	AT1G05750	AT1G10130
	AT1G32928	AT1G31280	AT1G50120	AT1G54630	AT1G32928	AT1G47330	AT1G31820	AT1G29550	AT3G53370	AT1G49730	AT1G18190	AT1G16810			AT1G10140	AT1G22890	AT1G10140	AT1G22890	AT1G09195	AT1G16840	AT1G07630	AT1G14910	AT3G18250	AT5G37740	AT1G05790	AT1G10140
	AT1G32960	AT1G31340	AT1G50940	AT1G54680	AT1G33055	AT1G48790	AT1G31880	AT1G29750	AT3G54030	AT5G03230	AT1G18400	AT1G17230			AT1G10200	AT1G23390	AT1G10170	AT1G23490	AT1G09415	AT1G16930	AT1G07670	AT1G15020	AT2G36400	AT5G02150	AT1G05805	AT1G10170
	AT1G33120	AT1G31570	AT1G51550	AT1G54710	AT1G33265	AT1G48970	AT1G32170	AT1G30090	AT3G54160	AT1G62040	AT1G18500	AT1G17280			AT1G10210	AT1G23490	AT1G10200	AT1G23840	AT1G09420	AT1G17147	AT1G07810	AT1G15480	AT5G38710	AT1G70160	AT1G05840	AT1G10200
	AT1G33265	AT1G31730	AT1G51913	AT1G55000	AT1G33400	AT1G49130	AT1G32928	AT1G30100	AT3G55560	AT5G03030	AT1G18540	AT1G17440			AT1G10340	AT1G23840	AT1G10210	AT1G23870	AT1G09430	AT1G17240	AT1G07900	AT1G15530	AT2G46490	AT3G51840	AT1G05890	AT1G10210
	AT1G33560	AT1G33490	AT1G52260	AT1G55365	AT1G33420	AT1G49180	AT1G33055	AT1G31340	AT3G56880	AT1G06400	AT1G18580	AT1G17490			AT1G10417	AT1G23870	AT1G10340	AT1G24090	AT1G09480	AT1G17340	AT1G07990	AT1G15670	AT5G12940	AT1G72060	AT1G05950	AT1G10560
	AT1G33590	AT1G33770	AT1G52347	AT1G55760	AT1G33560	AT1G49730	AT1G33600	AT1G31570	AT3G57760	AT1G80670	AT1G18620	AT1G17580			AT1G10590	AT1G24090	AT1G10350	AT1G24440	AT1G09560	AT1G17530	AT1G08050	AT1G15740	AT2G46330	AT5G64360	AT1G05970	AT1G10630
	AT1G33600	AT1G33780	AT1G52720	AT1G55880	AT1G33730	AT1G50520	AT1G33770	AT1G33250	AT3G63290	AT5G24890	AT1G18640	AT1G17640			AT1G10920	AT1G24440	AT1G10590	AT1G25400	AT1G09645	AT1G18020	AT1G08350	AT1G15790	AT1G28280	AT3G45300	AT1G06050	AT1G10690
	AT1G33730	AT1G34630	AT1G52910	AT1G56150	AT1G33780	AT1G51170	AT1G34020	AT1G33490	AT4G00420	AT3G02700	AT1G18700	AT1G17930			AT1G11000	AT1G24460	AT1G10700	AT1G26580	AT1G09680	AT1G18160	AT1G08450	AT1G15800	AT4G11260	AT2G32730	AT1G06060	AT1G10700
	AT1G33780	AT1G34760	AT1G53180	AT1G56423	AT1G34760	AT1G51550	AT1G34060	AT1G33780	AT4G04780	AT1G22790	AT1G19120	AT1G17970			AT1G11175	AT1G24510	AT1G10920	AT1G26740	AT1G09730	AT1G18700	AT1G08460	AT1G15880	AT3G50950	AT1G67120	AT1G06110	AT1G11300
	AT1G34020	AT1G43160	AT1G53580	AT1G58420	AT1G35612	AT1G52315	AT1G34270	AT1G34060	AT4G09560	AT4G36032	AT1G19180	AT1G18190			AT1G11200	AT1G25400	AT1G11000	AT1G27100	AT1G09910	AT1G18800	AT1G08630	AT1G15890	AT1G08630	AT2G24240	AT1G06130	AT1G11310
	AT1G34044	AT1G43690	AT1G53887	AT1G60970	AT1G35670	AT1G53170	AT1G34760	AT1G34630	AT4G09760	AT5G51370	AT1G19220	AT1G18350			AT1G11260	AT1G25540	AT1G11050	AT1G27450	AT1G09940	AT1G18910	AT1G08700	AT1G16000	AT3G15356	AT5G56180	AT1G06160	AT1G11350
	AT1G34270	AT1G44350	AT1G54000	AT1G61000	AT1G35720	AT1G53580	AT1G35612	AT1G36620	AT4G09800	AT3G53960	AT1G19380	AT1G18470			AT1G11300	AT1G25560	AT1G11260	AT1G27530	AT1G09970	AT1G19310	AT1G08720	AT1G16110	AT1G61430	AT1G80960	AT1G06290	AT1G11360
	AT1G35350	AT1G47330	AT1G54250	AT1G61160	AT1G45000	AT1G54390	AT1G35670	AT1G43160	AT4G10140	AT3G55240	AT1G19670	AT1G18540			AT1G11310	AT1G26580	AT1G11300	AT1G28070	AT1G10050	AT1G19396	AT1G08820	AT1G16130	AT1G21130	AT1G80420	AT1G06630	AT1G11475
	AT1G36622	AT1G47480	AT1G54440	AT1G62040	AT1G45332	AT1G54580	AT1G44170	AT1G43690	AT4G10330	AT4G31398	AT1G19770	AT1G18640			AT1G11360	AT1G27100	AT1G11310	AT1G28250	AT1G10070	AT1G19397	AT1G08830	AT1G16150	AT3G10985	AT1G12970	AT1G06760	AT1G11480
	AT1G43910	AT1G47710	AT1G55080	AT1G62430	AT1G47290	AT1G54680	AT1G45000	AT1G47128	AT4G11280	AT1G15175	AT1G19870	AT1G19000			AT1G11940	AT1G27290	AT1G11940	AT1G28260	AT1G10170	AT1G19660	AT1G08900	AT1G16240	AT2G27200	AT1G14860	AT1G06840	AT1G11610
	AT1G44170	AT1G47960	AT1G55130	AT1G63000	AT1G47550	AT1G55000	AT1G47710	AT1G47330	AT4G13250	AT1G33490	AT1G19910	AT1G19170			AT1G12210	AT1G27300	AT1G12220	AT1G29310	AT1G10200	AT1G20350	AT1G08930	AT1G16260	AT5G18130	AT1G78460	AT1G06870	AT1G12000
	AT1G47710	AT1G48120	AT1G55760	AT1G63220	AT1G47710	AT1G55265	AT1G48380	AT1G47710	AT4G14880	AT5G16690	AT1G20020	AT1G19220			AT1G12220	AT1G27450	AT1G12290	AT1G29970	AT1G10210	AT1G20620	AT1G08940	AT1G16560	AT1G17147	AT1G78830	AT1G07000	AT1G12013
	AT1G47860	AT1G48360	AT1G55790	AT1G64200	AT1G48160	AT1G55365	AT1G49170	AT1G47960	AT4G18210	AT5G08520	AT1G20200	AT1G19290			AT1G12360	AT1G28250	AT1G12360	AT1G30460	AT1G10340	AT1G20630	AT1G09040	AT1G16670	AT1G30730	AT5G16370	AT1G07020	AT1G12160
	AT1G48140	AT1G48380	AT1G56230	AT1G64750	AT1G48380	AT1G55760	AT1G49500	AT1G48360	AT4G19170	AT3G55440	AT1G20510	AT1G19300			AT1G12440	AT1G28260	AT1G12390	AT1G30820	AT1G10417	AT1G20760	AT1G09050	AT1G16900	AT2G31585	AT5G19690	AT1G07040	AT1G12210
	AT1G48380	AT1G49130	AT1G57590	AT1G65000	AT1G49350	AT1G56090	AT1G51170	AT1G48380	AT4G19865	AT1G74930	AT1G20880	AT1G19380			AT1G12780	AT1G28330	AT1G12440	AT1G30825	AT1G10690	AT1G20840	AT1G09080	AT1G17147	AT1G77210	AT1G22500	AT1G07090	AT1G12220
	AT1G50010	AT1G49730	AT1G59560	AT1G65500	AT1G49730	AT1G57590	AT1G51390	AT1G48790	AT4G20030	AT3G11590	AT1G21050	AT1G19397			AT1G12790	AT1G28580	AT1G12780	AT1G31550	AT1G10700	AT1G20970	AT1G09100	AT1G17270	AT5G66320	AT5G12350	AT1G07128	AT1G12270
	AT1G51170	AT1G49970	AT1G59600	AT1G65730	AT1G50010	AT1G58110	AT1G51400	AT1G49130	AT4G20380	AT3G57580	AT1G21310	AT1G19430			AT1G12910	AT1G30820	AT1G12970	AT1G32120	AT1G10730	AT1G21000	AT1G09195	AT1G17340	AT4G25970	AT1G75220	AT1G07135	AT1G12290
	AT1G51390	AT1G51170	AT1G60780	AT1G65845	AT1G50120	AT1G60070	AT1G51550	AT1G49180	AT4G24210	AT4G14905	AT1G21326	AT1G19670			AT1G12970	AT1G31835	AT1G13000	AT1G32130	AT1G10760	AT1G21100	AT1G09250	AT1G17430	AT1G29860	AT1G16000	AT1G07140	AT1G12360
	AT1G51550	AT1G51540	AT1G60940	AT1G65850	AT1G50940	AT1G60970	AT1G51760	AT1G49730	AT4G24370	AT5G43980	AT1G21440	AT1G19770			AT1G13000	AT1G32120	AT1G13060	AT1G32210	AT1G10920	AT1G21450	AT1G09280	AT1G17450	AT2G32680	AT4G36670	AT1G07160	AT1G12440
	AT1G51620	AT1G51550	AT1G61240	AT1G65960	AT1G51390	AT1G61000	AT1G51820	AT1G51170	AT4G27280	AT3G48590	AT1G21480	AT1G20110			AT1G13060	AT1G32210	AT1G13100	AT1G32230	AT1G11000	AT1G21610	AT1G09400	AT1G17500	AT1G13110	AT5G45750	AT1G07170	AT1G12680
	AT1G51660	AT1G51670	AT1G61260	AT1G66173	AT1G51400	AT1G61030	AT1G52220	AT1G51550	AT4G27960	AT5G05080	AT1G21500	AT1G20160			AT1G13100	AT1G32360	AT1G13110	AT1G32260	AT1G11020	AT1G21680	AT1G09415	AT1G17600	AT5G61210	AT1G27450	AT1G07220	AT1G12780
	AT1G51760	AT1G51913	AT1G61520	AT1G66480	AT1G52220	AT1G61160	AT1G52270	AT1G51670	AT4G32460	AT1G29550	AT1G21830	AT1G20225			AT1G13110	AT1G32700	AT1G13180	AT1G32330	AT1G11175	AT1G21920	AT1G09430	AT1G17610	AT5G63620	AT5G04040	AT1G07230	AT1G12840
	AT1G51820	AT1G52315	AT1G62430	AT1G67325	AT1G52260	AT1G61780	AT1G52347	AT1G52720	AT4G32605	AT3G11650	AT1G21840	AT1G20350			AT1G13180	AT1G32928	AT1G13210	AT1G32340	AT1G11200	AT1G22040	AT1G09520	AT1G18160	AT3G45290	AT1G61790	AT1G07240	AT1G12910
	AT1G51860	AT1G52890	AT1G63220	AT1G67820	AT1G52270	AT1G62040	AT1G52720	AT1G53170	AT4G34200	AT5G27710	AT1G22370	AT1G20460			AT1G13210	AT1G33050	AT1G13340	AT1G32700	AT1G11260	AT1G22060	AT1G09560	AT1G18390	AT2G03760	AT2G36900	AT1G07380	AT1G12970
	AT1G52270	AT1G53400	AT1G63690	AT1G67900	AT1G52910	AT1G62330	AT1G52910	AT1G53560	AT4G34215	AT5G39360	AT1G22410	AT1G20760			AT1G13260	AT1G33420	AT1G13450	AT1G32928	AT1G11300	AT1G22250	AT1G09570	AT1G18470	AT1G66240	AT3G04670	AT1G07520	AT1G12990
	AT1G52910	AT1G53580	AT1G65390	AT1G67950	AT1G53170	AT1G62430	AT1G53170	AT1G53580	AT4G38420	AT4G03115	AT1G22640	AT1G21480			AT1G13450	AT1G33475	AT1G13530	AT1G33050	AT1G11310	AT1G22275	AT1G09630	AT1G18800	AT1G23960	AT1G04200	AT1G07630	AT1G13000
	AT1G53170	AT1G54210	AT1G65610	AT1G68190	AT1G53400	AT1G62820	AT1G53180	AT1G53625	AT5G01600	AT1G60970	AT1G23000	AT1G21590			AT1G13470	AT1G33590	AT1G13540	AT1G33140	AT1G11350	AT1G22360	AT1G09645	AT1G18890	AT3G18035	AT4G35780	AT1G07670	AT1G13060
	AT1G53590	AT1G54390	AT1G65960	AT1G68310	AT1G53590	AT1G63000	AT1G53400	AT1G54390	AT5G02570	AT3G58170	AT1G23052	AT1G21700			AT1G13530	AT1G33600	AT1G13550	AT1G33410	AT1G11360	AT1G22500	AT1G09680	AT1G18910	AT5G23540	AT1G67860	AT1G07728	AT1G13100
	AT1G53830	AT1G54410	AT1G66090	AT1G68840	AT1G53887	AT1G63090	AT1G53580	AT1G54580	AT5G05620	AT5G58740	AT1G23060	AT1G21760			AT1G13550	AT1G33610	AT1G13700	AT1G33420	AT1G11480	AT1G22570	AT1G09730	AT1G19270	AT5G63190	AT5G51400	AT1G07810	AT1G13110
	AT1G54410	AT1G54580	AT1G66160	AT1G68920	AT1G54250	AT1G63220	AT1G53590	AT1G54680	AT5G05790	AT3G50850	AT1G23190	AT1G21830			AT1G13700	AT1G35230	AT1G13990	AT1G33840	AT1G11950	AT1G22620	AT1G09740	AT1G19310	AT2G47130	AT1G15890	AT1G07820	AT1G13180
	AT1G54580	AT1G54630	AT1G66173	AT1G69030	AT1G54440	AT1G64572	AT1G54090	AT1G55000	AT5G06930	AT2G03310	AT1G23260	AT1G21910			AT1G13990	AT1G35580	AT1G14010	AT1G33940	AT1G12210	AT1G22810	AT1G09870	AT1G19660	AT4G32180	AT1G24090	AT1G07900	AT1G13190
	AT1G55760	AT1G55000	AT1G66580	AT1G69485	AT1G54580	AT1G65000	AT1G54130	AT1G55230	AT5G07590	AT3G22930	AT1G23390	AT1G21920			AT1G14010	AT1G35590	AT1G14170	AT1G33950	AT1G12220	AT1G22890	AT1G09910	AT1G20620	AT4G33510	AT2G28120	AT1G07990	AT1G13210
	AT1G55790	AT1G55230	AT1G67050	AT1G69510	AT1G55130	AT1G65960	AT1G54250	AT1G55265	AT5G07810	AT1G51170	AT1G23710	AT1G22360			AT1G14170	AT1G35612	AT1G14260	AT1G34380	AT1G12290	AT1G22930	AT1G09940	AT1G20630	AT4G21540	AT4G27450	AT1G08050	AT1G13260
	AT1G56010	AT1G55760	AT1G67900	AT1G69850	AT1G55760	AT1G66173	AT1G54440	AT1G55325	AT5G08320	AT1G71970	AT1G23850	AT1G22370			AT1G14205	AT1G36060	AT1G14360	AT1G35230	AT1G12360	AT1G22985	AT1G09970	AT1G20840	AT2G43210	AT2G06025	AT1G08315	AT1G13450
	AT1G56230	AT1G55880	AT1G68190	AT1G70740	AT1G56230	AT1G66480	AT1G54580	AT1G55365	AT5G10030	AT4G04409	AT1G23870	AT1G22540			AT1G14260	AT1G36200	AT1G14370	AT1G35580	AT1G12390	AT1G23020	AT1G10040	AT1G20890	AT3G53490	AT5G12120	AT1G08350	AT1G13470
	AT1G57590	AT1G56090	AT1G68330	AT1G70940	AT1G57590	AT1G67300	AT1G55130	AT1G55760	AT5G11280	AT2G43760	AT1G24090	AT1G22640			AT1G14360	AT1G36600	AT1G14400	AT1G35620	AT1G12440	AT1G23052	AT1G10050	AT1G20970	AT4G17486	AT5G05750	AT1G08450	AT1G13530
	AT1G58225	AT1G56150	AT1G68680	AT1G71030	AT1G58200	AT1G67420	AT1G55760	AT1G56090	AT5G11290	AT4G08330	AT1G24140	AT1G22790			AT1G14370	AT1G37110	AT1G14480	AT1G36200	AT1G12470	AT1G23130	AT1G10070	AT1G21390	AT1G32120	AT4G24690	AT1G08460	AT1G13550
	AT1G58420	AT1G56650	AT1G68840	AT1G71410	AT1G58300	AT1G67950	AT1G56230	AT1G56150	AT5G12140	AT2G31751	AT1G24575	AT1G23052			AT1G14400	AT1G43130	AT1G14510	AT1G36620	AT1G12760	AT1G23510	AT1G10130	AT1G21450	AT1G17500	AT4G16130	AT1G08630	AT1G13700
	AT1G60730	AT1G58420	AT1G69370	AT1G71530	AT1G59620	AT1G68200	AT1G58200	AT1G56250	AT5G14590	AT5G64910	AT1G25230	AT1G23060			AT1G14510	AT1G43502	AT1G14540	AT1G45332	AT1G12780	AT1G23840	AT1G10170	AT1G21580	AT1G09940	AT3G09030	AT1G08680	AT1G13800
	AT1G60780	AT1G60970	AT1G69490	AT1G71865	AT1G59990	AT1G68840	AT1G60940	AT1G56423	AT5G15650	AT5G53340	AT1G25540	AT1G23080			AT1G14540	AT1G47310	AT1G14570	AT1G47260	AT1G12910	AT1G23870	AT1G10200	AT1G21610	AT5G14270	AT5G62630	AT1G08700	AT1G13970
	AT1G61240	AT1G61000	AT1G69510	AT1G71880	AT1G60140	AT1G68920	AT1G61240	AT1G56650	AT5G16050	AT5G63280	AT1G25550	AT1G23170			AT1G14660	AT1G47360	AT1G14670	AT1G47310	AT1G13000	AT1G24090	AT1G10210	AT1G21670	AT2G22660	AT2G25070	AT1G08720	AT1G13980
	AT1G61260	AT1G61120	AT1G69620	AT1G71890	AT1G60780	AT1G69370	AT1G61520	AT1G57590	AT5G18010	AT1G27385	AT1G26300	AT1G23390			AT1G14740	AT1G47640	AT1G14740	AT1G47420	AT1G13060	AT1G24400	AT1G10290	AT1G21680	AT4G21390	AT2G40000	AT1G08800	AT1G14080
	AT1G61520	AT1G61160	AT1G69830	AT1G71970	AT1G61240	AT1G69390	AT1G62430	AT1G60070	AT5G19070	AT1G14690	AT1G26390	AT1G23780			AT1G14860	AT1G47650	AT1G14790	AT1G47603	AT1G13110	AT1G24440	AT1G10340	AT1G22060	AT1G25400	AT1G20630	AT1G08820	AT1G14140
	AT1G62810	AT1G61610	AT1G69910	AT1G72660	AT1G61520	AT1G69485	AT1G62820	AT1G60970	AT5G20830	AT1G80400	AT1G26460	AT1G24575			AT1G14880	AT1G48280	AT1G14870	AT1G47640	AT1G13180	AT1G24450	AT1G10417	AT1G22180	AT1G56150	AT3G06500	AT1G08830	AT1G14170
	AT1G63720	AT1G62040	AT1G70290	AT1G72820	AT1G62820	AT1G69510	AT1G63690	AT1G61000	AT5G20900	AT5G08060	AT1G26558	AT1G24625			AT1G14910	AT1G48410	AT1G14880	AT1G48410	AT1G13190	AT1G24510	AT1G10560	AT1G22250	AT5G26920	AT1G80460	AT1G08890	AT1G14260
	AT1G63860	AT1G62330	AT1G70300	AT1G72840	AT1G63220	AT1G69740	AT1G63900	AT1G61030	AT5G21940	AT3G48880	AT1G26750	AT1G25550			AT1G15020	AT1G48440	AT1G14910	AT1G48570	AT1G13195	AT1G26090	AT1G10590	AT1G22280	AT2G01540	AT3G50470	AT1G08900	AT1G14300
	AT1G63900	AT1G62430	AT1G70350	AT1G73750	AT1G63690	AT1G70290	AT1G65390	AT1G61255	AT5G26940	AT3G03340	AT1G26840	AT1G26300			AT1G15030	AT1G48570	AT1G15020	AT1G48760	AT1G13210	AT1G26200	AT1G10630	AT1G22500	AT3G50740	AT1G75380	AT1G08930	AT1G14320
	AT1G65250	AT1G62820	AT1G70940	AT1G73830	AT1G64460	AT1G70490	AT1G65610	AT1G61780	AT5G27520	AT5G44569	AT1G27130	AT1G26460			AT1G15110	AT1G48760	AT1G15120	AT1G49480	AT1G13245	AT1G26550	AT1G10700	AT1G22510	AT5G62865	AT2G19810	AT1G08940	AT1G14380
	AT1G65390	AT1G62880	AT1G71310	AT1G74930	AT1G64470	AT1G71030	AT1G65690	AT1G62040	AT5G37420	AT1G69485	AT1G27150	AT1G26800			AT1G15120	AT1G49000	AT1G15125	AT1G50430	AT1G13270	AT1G26580	AT1G10730	AT1G22570	AT5G53550	AT1G02300	AT1G08980	AT1G14400
	AT1G65500	AT1G63000	AT1G71440	AT1G75370	AT1G65960	AT1G71530	AT1G66160	AT1G62370	AT5G40650	AT3G07930	AT1G27210	AT1G26840			AT1G15125	AT1G50740	AT1G15130	AT1G50740	AT1G13450	AT1G26670	AT1G10865	AT1G22620	AT5G06560	AT5G12370	AT1G09010	AT1G14520
	AT1G65610	AT1G63750	AT1G71890	AT1G75440	AT1G66090	AT1G71970	AT1G66173	AT1G62430	AT5G41590	AT4G15210	AT1G27290	AT1G26900			AT1G15130	AT1G52087	AT1G15175	AT1G51650	AT1G13470	AT1G26740	AT1G10920	AT1G22650	AT5G08240	AT5G66880	AT1G09040	AT1G14540
	AT1G65690	AT1G64190	AT1G71950	AT1G75490	AT1G66173	AT1G72010	AT1G66580	AT1G62570	AT5G42840	AT5G57660	AT1G27435	AT1G27290			AT1G15175	AT1G52850	AT1G15670	AT1G53280	AT1G13520	AT1G26800	AT1G11000	AT1G22710	AT1G22180	AT1G15880	AT1G09050	AT1G14570
	AT1G65960	AT1G64200	AT1G72160	AT1G75500	AT1G66580	AT1G72660	AT1G66900	AT1G62820	AT5G42860	AT5G65207	AT1G27730	AT1G27300			AT1G15370	AT1G53320	AT1G15740	AT1G53400	AT1G13530	AT1G27300	AT1G11175	AT1G22870	AT3G01080	AT5G64190	AT1G09080	AT1G14580
	AT1G65970	AT1G64572	AT1G72630	AT1G76260	AT1G66900	AT1G72690	AT1G67050	AT1G62880	AT5G44005	AT5G56840	AT1G27770	AT1G27320			AT1G15400	AT1G53480	AT1G15790	AT1G53580	AT1G13540	AT1G27450	AT1G11200	AT1G22890	AT5G02040	AT4G21960	AT1G09100	AT1G14620
	AT1G66090	AT1G64750	AT1G72910	AT1G77450	AT1G66960	AT1G72855	AT1G68190	AT1G63000	AT5G47370	AT5G12230	AT1G27930	AT1G27385			AT1G15520	AT1G53750	AT1G15800	AT1G53750	AT1G13550	AT1G27600	AT1G11260	AT1G23840	AT3G60190	AT5G04220	AT1G09195	AT1G14670
	AT1G66160	AT1G65000	AT1G72920	AT1G78570	AT1G67050	AT1G72870	AT1G68620	AT1G63750	AT5G47900	AT5G22400	AT1G27970	AT1G27840			AT1G15670	AT1G54010	AT1G15880	AT1G53770	AT1G13570	AT1G28070	AT1G11270	AT1G23870	AT5G14120	AT3G23690	AT1G09250	AT1G14740
	AT1G66173	AT1G65410	AT1G72940	AT1G78890	AT1G67140	AT1G72950	AT1G68680	AT1G63800	AT5G49525	AT3G23635	AT1G28150	AT1G27970			AT1G15740	AT1G54460	AT1G15890	AT1G53850	AT1G13980	AT1G28110	AT1G11300	AT1G23900	AT1G53390	AT1G05805	AT1G09280	AT1G14790
	AT1G66580	AT1G65500	AT1G73210	AT1G79440	AT1G67190	AT1G73720	AT1G68840	AT1G64200	AT5G50850	AT3G23030	AT1G28200	AT1G28230			AT1G15790	AT1G54740	AT1G15910	AT1G54010	AT1G13990	AT1G28230	AT1G11310	AT1G24090	AT1G24145	AT4G39090	AT1G09400	AT1G14860
	AT1G66920	AT1G65730	AT1G73750	AT1G79590	AT1G67900	AT1G73750	AT1G69030	AT1G64563	AT5G52545	AT5G08590	AT1G28370	AT1G28250			AT1G15800	AT1G55860	AT1G16090	AT1G54460	AT1G14010	AT1G28260	AT1G11330	AT1G24145	AT1G79670	AT1G20970	AT1G09415	AT1G14880
	AT1G66960	AT1G66173	AT1G73830	AT1G80320	AT1G68190	AT1G73920	AT1G69360	AT1G64572	AT5G53120	AT3G50270	AT1G29060	AT1G28490			AT1G15880	AT1G56220	AT1G16110	AT1G54660	AT1G14170	AT1G28330	AT1G11350	AT1G24150	AT5G21170	AT3G02340	AT1G09420	AT1G14890
	AT1G67000	AT1G66480	AT1G73920	AT1G80400	AT1G68840	AT1G74930	AT1G69490	AT1G65000	AT5G54190	AT1G73750	AT1G29150	AT1G28540			AT1G15890	AT1G57990	AT1G16130	AT1G54926	AT1G14260	AT1G28580	AT1G11360	AT1G24440	AT1G56145	AT1G05890	AT1G09430	AT1G14910
	AT1G67350	AT1G67300	AT1G74370	AT1G80450	AT1G69360	AT1G75370	AT1G69510	AT1G65483	AT5G55190	AT2G43680	AT1G29260	AT1G28570			AT1G15910	AT1G58190	AT1G16150	AT1G55090	AT1G14370	AT1G29715	AT1G11480	AT1G24470	AT4G21534	AT2G40410	AT1G09480	AT1G15010
	AT1G67500	AT1G67900	AT1G74940	AT1G80650	AT1G69370	AT1G75440	AT1G69620	AT1G65850	AT5G55500		AT1G29290	AT1G29260			AT1G16090	AT1G58200	AT1G16180	AT1G55170	AT1G14380	AT1G29800	AT1G11660	AT1G24510	AT4G25070	AT5G53460	AT1G09520	AT1G15020
	AT1G67900	AT1G68190	AT1G75220	AT1G80670	AT1G69510	AT1G75490	AT1G69780	AT1G66173	AT5G60190		AT1G29390	AT1G29550			AT1G16110	AT1G58300	AT1G16240	AT1G56070	AT1G14400	AT1G30220	AT1G11905	AT1G24575	AT5G10790	AT5G13570	AT1G09530	AT1G15480
	AT1G67920	AT1G68310	AT1G75460	AT1G80900	AT1G69530	AT1G76260	AT1G69910	AT1G66480	AT5G63400		AT1G29460	AT1G29750			AT1G16130	AT1G59590	AT1G16250	AT1G56190	AT1G14510	AT1G30370	AT1G11950	AT1G25480	AT3G56410	AT1G76590	AT1G09560	AT1G15530
	AT1G67940	AT1G68920	AT1G76660	AT2G01020	AT1G69780	AT1G76320	AT1G69930	AT1G67300	AT5G64350		AT1G29465	AT1G29850			AT1G16150	AT1G59610	AT1G16260	AT1G56220	AT1G14540	AT1G30810	AT1G12200	AT1G25540	AT5G58290	AT2G14740	AT1G09570	AT1G15670
	AT1G67960	AT1G69030	AT1G76730	AT2G01100	AT1G69830	AT1G76900	AT1G70290	AT1G67325	AT5G65050		AT1G29490	AT1G30040			AT1G16180	AT1G60140	AT1G16420	AT1G57990	AT1G14570	AT1G30825	AT1G12210	AT1G25550	AT2G29720	AT5G11720	AT1G09575	AT1G15740
	AT1G67980	AT1G69370	AT1G76790	AT2G01140	AT1G69930	AT1G77450	AT1G70300	AT1G67820	AT5G65440		AT1G29690	AT1G30090			AT1G16240	AT1G61510	AT1G16500	AT1G58200	AT1G14660	AT1G31290	AT1G12220	AT1G25580	AT5G45000	AT3G19553	AT1G09630	AT1G15790
	AT1G68330	AT1G69485	AT1G77000	AT2G02180	AT1G69980	AT1G77480	AT1G70350	AT1G67950	AT5G66650		AT1G29715	AT1G30100			AT1G16260	AT1G61770	AT1G16560	AT1G58300	AT1G14740	AT1G32120	AT1G12290	AT1G26090	AT3G61630	AT1G75140	AT1G09645	AT1G15800
	AT1G68620	AT1G69790	AT1G77765	AT2G02760	AT1G70290	AT1G78890	AT1G70740	AT1G68330			AT1G29750	AT1G30200			AT1G16470	AT1G61780	AT1G16670	AT1G59590	AT1G14790	AT1G32530	AT1G12350	AT1G26130	AT1G33050	AT3G54860	AT1G09680	AT1G15880
	AT1G68680	AT1G70150	AT1G78370	AT2G03310	AT1G70350	AT1G78900	AT1G70800	AT1G68390			AT1G29910	AT1G30510			AT1G16560	AT1G61790	AT1G16890	AT1G60140	AT1G14860	AT1G32580	AT1G12360	AT1G26200	AT2G39210	AT2G04690	AT1G09730	AT1G15890
	AT1G68765	AT1G70581	AT1G78380	AT2G03440	AT1G70490	AT1G79440	AT1G70940	AT1G68920			AT1G29920	AT1G30820			AT1G16670	AT1G62300	AT1G17080	AT1G60420	AT1G14870	AT1G32700	AT1G12470	AT1G26300	AT3G58750	AT1G48760	AT1G09740	AT1G16000
	AT1G68820	AT1G71940	AT1G79530	AT2G03590	AT1G70740	AT1G79590	AT1G71260	AT1G69030			AT1G29990	AT1G31280			AT1G16840	AT1G63180	AT1G17145	AT1G61170	AT1G15020	AT1G32740	AT1G12760	AT1G26440	AT2G01340	AT3G49780	AT1G09815	AT1G16110
	AT1G69360	AT1G71970	AT1G79610	AT2G03690	AT1G70940	AT1G79870	AT1G71310	AT1G69370			AT1G30300	AT1G31340			AT1G16890	AT1G63770	AT1G17147	AT1G61250	AT1G15110	AT1G32928	AT1G12780	AT1G26460	AT5G45110	AT1G70530	AT1G09870	AT1G16130
	AT1G69370	AT1G72220	AT1G79990	AT2G05160	AT1G71260	AT1G80320	AT1G71890	AT1G69390			AT1G30510	AT1G31570			AT1G17080	AT1G64460	AT1G17240	AT1G61780	AT1G15125	AT1G33050	AT1G12840	AT1G26550	AT2G30770	AT2G27310	AT1G09910	AT1G16150
	AT1G69410	AT1G72450	AT1G80110	AT2G05630	AT1G71310	AT1G80400	AT1G71970	AT1G69485			AT1G30630	AT1G31730			AT1G17147	AT1G64470	AT1G17250	AT1G61790	AT1G15130	AT1G33140	AT1G12910	AT1G26580	AT3G08650	AT4G38470	AT1G09930	AT1G16240
	AT1G69490	AT1G72660	AT1G80310	AT2G07671	AT1G71440	AT1G80450	AT1G72160	AT1G69510			AT1G30720	AT1G31880			AT1G17160	AT1G64520	AT1G17290	AT1G63740	AT1G15240	AT1G33410	AT1G12970	AT1G26670	AT2G28630	AT5G57190	AT1G09940	AT1G16250
	AT1G69620	AT1G72690	AT1G80400	AT2G16660	AT1G71865	AT1G80670	AT1G72175	AT1G69740			AT1G30820	AT1G32170			AT1G17240	AT1G65370	AT1G17340	AT1G63770	AT1G15350	AT1G33420	AT1G12990	AT1G26800	AT1G18570	AT2G15890	AT1G09970	AT1G16260
	AT1G69830	AT1G72710	AT1G80440	AT2G16930	AT1G71890	AT2G01100	AT1G72630	AT1G69780			AT1G30850	AT1G32270			AT1G17250	AT1G66230	AT1G17410	AT1G64460	AT1G15380	AT1G33790	AT1G13000	AT1G26830	AT1G77810	AT1G64460	AT1G10040	AT1G16470
	AT1G69900	AT1G72820	AT1G80600	AT2G17450	AT1G73210	AT2G02050	AT1G72940	AT1G69790			AT1G30890	AT1G33250			AT1G17290	AT1G66410	AT1G17455	AT1G64470	AT1G15530	AT1G33840	AT1G13060	AT1G27100	AT1G06840	AT3G22190	AT1G10050	AT1G16560
	AT1G69930	AT1G72840	AT1G80720	AT2G17560	AT1G73790	AT2G03310	AT1G73790	AT1G69850			AT1G31010	AT1G33475			AT1G17340	AT1G66580	AT1G17500	AT1G64520	AT1G15670	AT1G33970	AT1G13100	AT1G27180	AT1G01240	AT2G46260	AT1G10070	AT1G16570
	AT1G70300	AT1G73720	AT1G80840	AT2G17880	AT1G74370	AT2G03440	AT1G74370	AT1G70290			AT1G31330	AT1G33490			AT1G17410	AT1G66680	AT1G17590	AT1G65290	AT1G15740	AT1G33980	AT1G13110	AT1G27310	AT2G45980	AT1G58300	AT1G10130	AT1G16670
	AT1G70350	AT1G73750	AT1G80900	AT2G18650	AT1G74910	AT2G04550	AT1G74910	AT1G70330			AT1G31340	AT1G33610			AT1G17455	AT1G66970	AT1G17600	AT1G65980	AT1G15790	AT1G34044	AT1G13180	AT1G27450	AT5G63080	AT1G80510	AT1G10140	AT1G16840
	AT1G70940	AT1G74930	AT1G80950	AT2G18960	AT1G74930	AT2G05160	AT1G74930	AT1G70581			AT1G31570	AT1G33612			AT1G17500	AT1G67105	AT1G17610	AT1G66580	AT1G15880	AT1G34150	AT1G13210	AT1G27530	AT5G06240	AT5G06865	AT1G10170	AT1G16900
	AT1G71310	AT1G75420	AT2G01420	AT2G19350	AT1G74940	AT2G07671	AT1G74940	AT1G70750			AT1G31820	AT1G33770			AT1G17590	AT1G67120	AT1G17860	AT1G66680	AT1G15890	AT1G34180	AT1G13260	AT1G27650	AT4G02350	AT2G33150	AT1G10200	AT1G16930
	AT1G71410	AT1G75440	AT2G01930	AT2G20330	AT1G75440	AT2G13130	AT1G75220	AT1G70820			AT1G31880	AT1G33780			AT1G17600	AT1G67860	AT1G17980	AT1G66960	AT1G16030	AT1G34300	AT1G13270	AT1G28070	AT1G77500	AT1G15530	AT1G10210	AT1G17147
	AT1G71890	AT1G75500	AT2G02450	AT2G20370	AT1G76100	AT2G14290	AT1G75440	AT1G71030			AT1G32170	AT1G34060			AT1G17640	AT1G68000	AT1G18030	AT1G66970	AT1G16090	AT1G34370	AT1G13320	AT1G28110	AT5G39050	AT5G05010	AT1G10290	AT1G17240
	AT1G71950	AT1G76260	AT2G02540	AT2G22690	AT1G76185	AT2G16740	AT1G75500	AT1G71410			AT1G32928	AT1G34630			AT1G17970	AT1G68840	AT1G18160	AT1G67120	AT1G16110	AT1G34630	AT1G13330	AT1G28260	AT1G50740	AT1G28260	AT1G10340	AT1G17270
	AT1G72830	AT1G76320	AT2G03220	AT2G22830	AT1G76600	AT2G17450	AT1G75760	AT1G71440			AT1G32960	AT1G34760			AT1G17980	AT1G69360	AT1G18210	AT1G67250	AT1G16130	AT1G34760	AT1G13340	AT1G28330	AT2G36330	AT1G03850	AT1G10350	AT1G17340
	AT1G72920	AT1G77450	AT2G03330	AT2G23780	AT1G76640	AT2G17500	AT1G76100	AT1G71530			AT1G33055	AT1G35320			AT1G18030	AT1G69740	AT1G18260	AT1G67860	AT1G16150	AT1G35230	AT1G13360	AT1G28580	AT5G03540	AT3G19270	AT1G10417	AT1G17430
	AT1G72940	AT1G77480	AT2G03440	AT2G23840	AT1G76660	AT2G17700	AT1G76600	AT1G71865			AT1G33120	AT1G35670			AT1G18160	AT1G69780	AT1G18270	AT1G68000	AT1G16180	AT1G35580	AT1G13450	AT1G29240	AT2G40110	AT1G77220	AT1G10560	AT1G17450
	AT1G73210	AT1G78570	AT2G03620	AT2G24160	AT1G76730	AT2G17880	AT1G76660	AT1G71880			AT1G33265	AT1G36620			AT1G18260	AT1G69850	AT1G18382	AT1G68020	AT1G16240	AT1G35612	AT1G13470	AT1G29715	AT4G12070	AT1G03475	AT1G10590	AT1G17500
	AT1G73750	AT1G78670	AT2G05160	AT2G25200	AT1G76790	AT2G18010	AT1G76680	AT1G71890			AT1G33400	AT1G36940			AT1G18390	AT1G69890	AT1G18390	AT1G68140	AT1G16250	AT1G35620	AT1G13480	AT1G29860	AT1G22280	AT3G12290	AT1G10630	AT1G17530
	AT1G73920	AT1G78910	AT2G05630	AT2G25300	AT1G77350	AT2G18650	AT1G76930	AT1G71970			AT1G33420	AT1G43160			AT1G18470	AT1G70160	AT1G18470	AT1G69270	AT1G16260	AT1G35670	AT1G13520	AT1G29970	AT2G15230	AT1G33420	AT1G10690	AT1G17600
	AT1G74370	AT1G79590	AT2G14620	AT2G25450	AT1G77460	AT2G18700	AT1G77460	AT1G72010			AT1G33560	AT1G43690			AT1G18570	AT1G70290	AT1G18570	AT1G69360	AT1G16500	AT1G35720	AT1G13530	AT1G30000	AT5G01542	AT1G04400	AT1G10700	AT1G17610
	AT1G74650	AT1G79870	AT2G15760	AT2G25470	AT1G77750	AT2G18960	AT1G78380	AT1G72220			AT1G33590	AT1G44350			AT1G18670	AT1G70300	AT1G18720	AT1G69780	AT1G16510	AT1G36050	AT1G13540	AT1G30220	AT5G54140	AT5G63850	AT1G10730	AT1G17990
	AT1G74940	AT1G80110	AT2G17450	AT2G26260	AT1G77765	AT2G19250	AT1G78850	AT1G72660			AT1G33600	AT1G45233			AT1G18700	AT1G70320	AT1G18890	AT1G69890	AT1G16670	AT1G42480	AT1G13550	AT1G30270	AT4G26160	AT1G04440	AT1G10760	AT1G18020
	AT1G75220	AT1G80400	AT2G17560	AT2G26710	AT1G78380	AT2G19350	AT1G78900	AT1G72690			AT1G33730	AT1G47128			AT1G18720	AT1G70420	AT1G19020	AT1G70160	AT1G16840	AT1G43130	AT1G13750	AT1G30460	AT1G67850	AT5G22270	AT1G10865	AT1G18160
	AT1G75760	AT1G80670	AT2G17780	AT2G27830	AT1G78600	AT2G19830	AT1G79040	AT1G72840			AT1G33770	AT1G47330			AT1G18745	AT1G70490	AT1G19270	AT1G70290	AT1G16890	AT1G44770	AT1G13830	AT1G30820	AT2G30530	AT4G19860	AT1G10920	AT1G18260
	AT1G76185	AT2G01020	AT2G18010	AT2G28760	AT1G78830	AT2G20330	AT1G79530	AT1G73720			AT1G33780	AT1G47480			AT1G18773	AT1G70520	AT1G19310	AT1G70420	AT1G16930	AT1G44780	AT1G13980	AT1G30825	AT3G26180	AT5G05090	AT1G11000	AT1G18390
	AT1G76520	AT2G01420	AT2G18020	AT2G28960	AT1G78850	AT2G20360	AT1G79610	AT1G73750			AT1G34020	AT1G47710			AT1G18890	AT1G70530	AT1G19360	AT1G70490	AT1G17145	AT1G45231	AT1G13990	AT1G30890	AT4G24230	AT5G43830	AT1G11020	AT1G18470
	AT1G76600	AT2G02480	AT2G18040	AT2G29490	AT1G79010	AT2G20650	AT1G80110	AT1G73820			AT1G34044	AT1G47960			AT1G18910	AT1G70820	AT1G19380	AT1G70520	AT1G17147	AT1G45332	AT1G14000	AT1G31460	AT5G22310	AT1G69890	AT1G11050	AT1G18700
	AT1G76660	AT2G02760	AT2G18300	AT2G30105	AT1G79040	AT2G22690	AT1G80310	AT1G73875			AT1G34060	AT1G48120			AT1G19020	AT1G71030	AT1G19660	AT1G70530	AT1G17240	AT1G47310	AT1G14010	AT1G31870	AT5G36925	AT5G59960	AT1G11175	AT1G18720
	AT1G76730	AT2G03310	AT2G18770	AT2G30740	AT1G79610	AT2G22830	AT1G80400	AT1G73920			AT1G34270	AT1G48280			AT1G19130	AT1G71697	AT1G19770	AT1G70690	AT1G17290	AT1G47603	AT1G14070	AT1G32120	AT1G59590	AT2G44140	AT1G11200	AT1G18800
	AT1G76930	AT2G03440	AT2G20260	AT2G30920	AT1G79990	AT2G23140	AT1G80440	AT1G74240			AT1G34760	AT1G48360			AT1G19250	AT1G72020	AT1G19968	AT1G70820	AT1G17330	AT1G47960	AT1G14080	AT1G32172	AT3G09020	AT1G15670	AT1G11260	AT1G18890
	AT1G76955	AT2G03890	AT2G20360	AT2G31130	AT1G80110	AT2G23780	AT1G80600	AT1G74930			AT1G35350	AT1G48380			AT1G19270	AT1G72060	AT1G20200	AT1G71080	AT1G17340	AT1G47980	AT1G14170	AT1G32210	AT5G42080	AT1G06130	AT1G11270	AT1G18910
	AT1G77920	AT2G05630	AT2G20850	AT2G31751	AT1G80400	AT2G23840	AT1G80720	AT1G75440			AT1G35612	AT1G48790			AT1G19310	AT1G73500	AT1G20350	AT1G71220	AT1G17455	AT1G48280	AT1G14205	AT1G32230	AT5G66790	AT2G21240	AT1G11300	AT1G19270
	AT1G78300	AT2G06050	AT2G20990	AT2G32020	AT1G80440	AT2G24650	AT1G80830	AT1G75490			AT1G35670	AT1G48970			AT1G19660	AT1G73680	AT1G20575	AT1G71390	AT1G17500	AT1G48760	AT1G14260	AT1G32340	AT5G65600	AT1G35230	AT1G11310	AT1G19310
	AT1G78380	AT2G07671	AT2G21020	AT2G32150	AT1G80600	AT2G24830	AT1G80840	AT1G76070			AT1G35720	AT1G49130			AT1G19770	AT1G73920	AT1G20620	AT1G71440	AT1G17590	AT1G49160	AT1G14370	AT1G32490	AT2G12550	AT3G26740	AT1G11330	AT1G19396
	AT1G78660	AT2G14170	AT2G21050	AT2G32487	AT1G80650	AT2G25200	AT1G80860	AT1G76260			AT1G36622	AT1G49180			AT1G19968	AT1G74260	AT1G20630	AT1G71520	AT1G17600	AT1G49230	AT1G14400	AT1G32700	AT1G65720	AT4G29750	AT1G11350	AT1G19397
	AT1G79450	AT2G16740	AT2G21160	AT2G32980	AT1G80720	AT2G25737	AT1G80900	AT1G77450			AT1G43910	AT1G49730			AT1G20200	AT1G75140	AT1G20760	AT1G71697	AT1G17860	AT1G49480	AT1G14510	AT1G32928	AT3G26165	AT5G25270	AT1G11360	AT1G19660
	AT1G79530	AT2G18650	AT2G21530	AT2G33390	AT1G80830	AT2G26030	AT1G80950	AT1G77480			AT1G44170	AT1G49970			AT1G20460	AT1G75220	AT1G20780	AT1G72060	AT1G18160	AT1G49720	AT1G14540	AT1G32950	AT1G14510	AT5G40890	AT1G11480	AT1G19770
	AT1G79610	AT2G19350	AT2G22570	AT2G33610	AT1G80850	AT2G26260	AT2G01420	AT1G78270			AT1G45000	AT1G50520			AT1G20620	AT1G75230	AT1G20890	AT1G73920	AT1G18210	AT1G50480	AT1G14570	AT1G33050	AT5G61450	AT5G10560	AT1G11660	AT1G20350
	AT1G79940	AT2G20370	AT2G23093	AT2G33620	AT1G80860	AT2G26990	AT2G01460	AT1G78570			AT1G45332	AT1G51140			AT1G20630	AT1G75380	AT1G20970	AT1G74260	AT1G18260	AT1G51270	AT1G14640	AT1G33420	AT4G38260	AT3G54880	AT1G11905	AT1G20620
	AT1G79990	AT2G21130	AT2G23940	AT2G33835	AT1G80900	AT2G27050	AT2G01490	AT1G78890			AT1G47290	AT1G51170			AT1G20760	AT1G75490	AT1G20980	AT1G74440	AT1G18270	AT1G52800	AT1G14670	AT1G33475	AT4G21560	AT1G24440	AT1G11940	AT1G20630
	AT1G80110	AT2G21190	AT2G24165	AT2G34810	AT1G80950	AT2G27460	AT2G02450	AT1G79590			AT1G47310	AT1G51540			AT1G20840	AT1G76200	AT1G21000	AT1G75040	AT1G18382	AT1G52810	AT1G14740	AT1G33600	AT1G26200	AT1G21450	AT1G11950	AT1G20760
	AT1G80400	AT2G21500	AT2G24550	AT2G36060	AT2G01420	AT2G27830	AT2G02540	AT1G79870			AT1G47550	AT1G51550			AT1G20890	AT1G76560	AT1G21100	AT1G75140	AT1G18390	AT1G53160	AT1G14790	AT1G33610	AT1G07520	AT3G18080	AT1G12200	AT1G20840
	AT1G80440	AT2G23780	AT2G24755	AT2G36080	AT2G02450	AT2G28960	AT2G02710	AT1G80310			AT1G47710	AT1G51670			AT1G21000	AT1G76590	AT1G21110	AT1G75200	AT1G18470	AT1G53165	AT1G14860	AT1G33720	AT4G27470	AT3G43670	AT1G12210	AT1G20890
	AT1G80720	AT2G23840	AT2G25180	AT2G36320	AT2G02540	AT2G29410	AT2G03440	AT1G80320			AT1G47860	AT1G51740			AT1G21100	AT1G76600	AT1G21120	AT1G75220	AT1G18570	AT1G53280	AT1G14870	AT1G33940	AT5G25210	AT5G55100	AT1G12220	AT1G20970
	AT1G80840	AT2G24650	AT2G25280	AT2G36910	AT2G02590	AT2G29670	AT2G03980	AT1G80400			AT1G48140	AT1G51913			AT1G21110	AT1G76900	AT1G21130	AT1G75380	AT1G18700	AT1G53330	AT1G14880	AT1G33950	AT3G51660	AT3G14310	AT1G12290	AT1G21000
	AT2G01140	AT2G25900	AT2G25440	AT2G37120	AT2G03220	AT2G30110	AT2G04550	AT1G80450			AT1G48160	AT1G52260			AT1G21120	AT1G77210	AT1G21240	AT1G76150	AT1G18745	AT1G53350	AT1G14910	AT1G33970	AT5G64880	AT5G23660	AT1G12350	AT1G21100
	AT2G01420	AT2G26310	AT2G25450	AT2G37460	AT2G03620	AT2G30580	AT2G05160	AT1G80670			AT1G48380	AT1G52315			AT1G21130	AT1G77220	AT1G21250	AT1G76200	AT1G18860	AT1G53400	AT1G15020	AT1G33980	AT1G04280	AT1G15740	AT1G12360	AT1G21390
	AT2G01460	AT2G26710	AT2G25737	AT2G38010	AT2G04530	AT2G30710	AT2G05210	AT1G80900			AT1G48570	AT1G52720			AT1G21240	AT1G77420	AT1G21270	AT1G76590	AT1G18890	AT1G53560	AT1G15120	AT1G34130	AT5G48160	AT2G02960	AT1G12390	AT1G21450
	AT2G02540	AT2G26990	AT2G25900	AT2G38340	AT2G04550	AT2G30920	AT2G06520	AT2G01020			AT1G49170	AT1G52890			AT1G21326	AT1G77660	AT1G21326	AT1G76600	AT1G18910	AT1G54410	AT1G15125	AT1G34180	AT1G05675	AT4G37190	AT1G12440	AT1G21580
	AT2G03220	AT2G27030	AT2G26710	AT2G38630	AT2G04650	AT2G31090	AT2G06530	AT2G01410			AT1G49350	AT1G53100			AT1G21370	AT1G77960	AT1G21370	AT1G76920	AT1G19020	AT1G54440	AT1G15130	AT1G34220	AT2G35060	AT3G49800	AT1G12470	AT1G21610
	AT2G03620	AT2G27285	AT2G27050	AT2G38710	AT2G05210	AT2G31130	AT2G07727	AT2G01440			AT1G49500	AT1G53170			AT1G21390	AT1G78270	AT1G21400	AT1G77210	AT1G19250	AT1G54660	AT1G15370	AT1G34300	AT4G26400	AT3G01770	AT1G12760	AT1G21670
	AT2G03980	AT2G27510	AT2G27330	AT2G38820	AT2G05630	AT2G31510	AT2G07811	AT2G01600			AT1G49730	AT1G53400			AT1G21400	AT1G78380	AT1G21450	AT1G77220	AT1G19270	AT1G54920	AT1G15400	AT1G34370	AT5G07130	AT5G16120	AT1G12780	AT1G21680
	AT2G05260	AT2G28760	AT2G27720	AT2G38840	AT2G14080	AT2G31751	AT2G14620	AT2G02350			AT1G50010	AT1G53560			AT1G21450	AT1G78420	AT1G21520	AT1G77350	AT1G19310	AT1G55090	AT1G15520	AT1G34380	AT5G13190	AT2G28210	AT1G12790	AT1G21720
	AT2G05630	AT2G30105	AT2G27830	AT2G38970	AT2G14620	AT2G32080	AT2G15760	AT2G02480			AT1G50120	AT1G53580			AT1G21520	AT1G78460	AT1G21550	AT1G77370	AT1G19380	AT1G55420	AT1G15530	AT1G34760	AT2G31020	AT3G19190	AT1G12840	AT1G21750
	AT2G05710	AT2G30920	AT2G28370	AT2G39000	AT2G14835	AT2G32400	AT2G17780	AT2G02510			AT1G50940	AT1G53625			AT1G21525	AT1G78830	AT1G21670	AT1G77420	AT1G19510	AT1G56190	AT1G15670	AT1G35230	AT3G66654	AT1G56220	AT1G12910	AT1G21830
	AT2G05765	AT2G30990	AT2G28400	AT2G39110	AT2G16090	AT2G32580	AT2G17880	AT2G03310			AT1G51170	AT1G53920			AT1G21610	AT1G78890	AT1G21750	AT1G77440	AT1G19540	AT1G56220	AT1G15740	AT1G35300	AT5G08520	AT1G20620	AT1G12970	AT1G21920
	AT2G06530	AT2G31130	AT2G28500	AT2G39700	AT2G17450	AT2G32660	AT2G18010	AT2G03440			AT1G51390	AT1G54210			AT1G21670	AT1G78920	AT1G21770	AT1G77480	AT1G19660	AT1G56540	AT1G15790	AT1G35590	AT4G33910	AT1G10170	AT1G12990	AT1G22040
	AT2G07727	AT2G31751	AT2G29670	AT2G39725	AT2G17560	AT2G32910	AT2G18030	AT2G03690			AT1G51400	AT1G54390			AT1G21680	AT1G79210	AT1G21830	AT1G77660	AT1G19770	AT1G57870	AT1G15800	AT1G35612	AT1G80180	AT1G80440	AT1G13000	AT1G22060
	AT2G07811	AT2G32150	AT2G29680	AT2G39750	AT2G17780	AT2G32980	AT2G18040	AT2G04050			AT1G51550	AT1G54410			AT1G21750	AT1G79440	AT1G21900	AT1G78380	AT1G20225	AT1G57990	AT1G15880	AT1G35710	AT4G19700	AT3G03870	AT1G13060	AT1G22180
	AT2G14610	AT2G32530	AT2G29690	AT2G39830	AT2G17880	AT2G33050	AT2G18290	AT2G05160			AT1G51620	AT1G54580			AT1G21770	AT1G79530	AT1G22070	AT1G78460	AT1G20350	AT1G58060	AT1G15890	AT1G36050	AT3G50260	AT4G28860	AT1G13100	AT1G22250
	AT2G14835	AT2G32660	AT2G30010	AT2G40180	AT2G18010	AT2G33610	AT2G18300	AT2G07671			AT1G51660	AT1G54630			AT1G21830	AT1G79990	AT1G22180	AT1G78830	AT1G20620	AT1G58180	AT1G16090	AT1G36060	AT2G37430	AT3G52850	AT1G13110	AT1G22275
	AT2G15760	AT2G32910	AT2G30190	AT2G40390	AT2G18020	AT2G33620	AT2G18650	AT2G14290			AT1G51760	AT1G54680			AT1G21900	AT1G80180	AT1G22250	AT1G78900	AT1G20630	AT1G58190	AT1G16110	AT1G36200	AT1G47640	AT4G37260	AT1G13180	AT1G22280
	AT2G17040	AT2G32970	AT2G30410	AT2G40830	AT2G18040	AT2G33710	AT2G18700	AT2G16660			AT1G51820	AT1G54710			AT1G22070	AT1G80310	AT1G22280	AT1G78920	AT1G20693	AT1G58200	AT1G16130	AT1G36470	AT4G04480	AT1G02660	AT1G13190	AT1G22360
	AT2G17560	AT2G33050	AT2G30600	AT2G40840	AT2G18280	AT2G35110	AT2G19600	AT2G17450			AT1G51860	AT1G55000			AT1G22180	AT1G80420	AT1G22360	AT1G79010	AT1G20760	AT1G58225	AT1G16150	AT1G36600	AT1G70160	AT3G06380	AT1G13195	AT1G22500
	AT2G17740	AT2G33390	AT2G30920	AT2G40880	AT2G18290	AT2G35240	AT2G20360	AT2G17700			AT1G51913	AT1G55230			AT1G22250	AT1G80440	AT1G22400	AT1G79210	AT1G20780	AT1G58300	AT1G16180	AT1G36975	AT2G18690	AT2G23810	AT1G13210	AT1G22510
	AT2G17780	AT2G34010	AT2G32010	AT2G41160	AT2G19250	AT2G35738	AT2G20990	AT2G17880			AT1G52220	AT1G55265			AT1G22280	AT1G80460	AT1G22500	AT1G79670	AT1G20840	AT1G58400	AT1G16240	AT1G37110	AT3G61010	AT2G01720	AT1G13245	AT1G22570
	AT2G18010	AT2G34580	AT2G32020	AT2G42280	AT2G19740	AT2G36305	AT2G21020	AT2G18010			AT1G52260	AT1G55325			AT1G22370	AT1G80510	AT1G22510	AT1G79990	AT1G20890	AT1G59600	AT1G16260	AT1G37801	AT5G28830	AT4G32060	AT1G13260	AT1G22620
	AT2G18040	AT2G34810	AT2G32170	AT2G42780	AT2G19810	AT2G36320	AT2G22475	AT2G18250			AT1G52270	AT1G55365			AT1G22400	AT1G80650	AT1G22570	AT1G80180	AT1G20970	AT1G59620	AT1G16420	AT1G37867	AT4G34370	AT3G15730	AT1G13270	AT1G22650
	AT2G18300	AT2G35240	AT2G32190	AT2G43120	AT2G20060	AT2G36910	AT2G22780	AT2G18650			AT1G52347	AT1G55760			AT1G22500	AT1G80920	AT1G22620	AT1G80420	AT1G20980	AT1G59900	AT1G16470	AT1G39190	AT1G04410	AT3G29320	AT1G13320	AT1G22710
	AT2G18650	AT2G35635	AT2G32487	AT2G43330	AT2G20260	AT2G37035	AT2G22840	AT2G19120			AT1G52720	AT1G55880			AT1G22510	AT1G80950	AT1G22650	AT1G80440	AT1G21000	AT1G59990	AT1G16500	AT1G40123	AT2G40600	AT5G42830	AT1G13330	AT1G22810
	AT2G18750	AT2G35738	AT2G32550	AT2G43400	AT2G20360	AT2G37120	AT2G22880	AT2G20360			AT1G52910	AT1G56090			AT1G22570	AT1G80960	AT1G22810	AT1G80460	AT1G21100	AT1G60140	AT1G16510	AT1G42705	AT2G02220	AT4G19160	AT1G13340	AT1G22840
	AT2G18770	AT2G36060	AT2G32970	AT2G43520	AT2G20390	AT2G37460	AT2G23093	AT2G22690			AT1G53170	AT1G56150			AT1G22620	AT2G01029	AT1G22860	AT1G80510	AT1G21110	AT1G60220	AT1G16540	AT1G43130	AT4G04972	AT2G41430	AT1G13360	AT1G22870
	AT2G19250	AT2G36305	AT2G33020	AT2G43680	AT2G20990	AT2G38010	AT2G24550	AT2G22830			AT1G53180	AT1G56250			AT1G22650	AT2G01100	AT1G22870	AT1G80600	AT1G21120	AT1G60940	AT1G16560	AT1G44070	AT1G01340	AT3G13430	AT1G13450	AT1G22890
	AT2G19600	AT2G38010	AT2G33370	AT2G43760	AT2G21050	AT2G38170	AT2G24755	AT2G22910			AT1G53400	AT1G56423			AT1G22870	AT2G01720	AT1G22890	AT1G80890	AT1G21130	AT1G61170	AT1G16670	AT1G44510	AT3G53990	AT3G49310	AT1G13470	AT1G22930
	AT2G20360	AT2G38630	AT2G34150	AT2G44130	AT2G21188	AT2G38180	AT2G25440	AT2G23370			AT1G53580	AT1G56650			AT1G22890	AT2G01840	AT1G22920	AT1G80920	AT1G21170	AT1G61460	AT1G16700	AT1G44770	AT1G11260	AT1G69360	AT1G13480	AT1G22985
	AT2G20990	AT2G38740	AT2G34430	AT2G44370	AT2G21530	AT2G38740	AT2G25737	AT2G23780			AT1G53590	AT1G57590			AT1G23052	AT2G02050	AT1G23090	AT1G80950	AT1G21200	AT1G61690	AT1G16710	AT1G44800	AT4G01740	AT4G22540	AT1G13520	AT1G23020
	AT2G21050	AT2G38790	AT2G34480	AT2G44380	AT2G22475	AT2G38820	AT2G26030	AT2G24650			AT1G53830	AT1G58110			AT1G23390	AT2G02220	AT1G23490	AT1G80960	AT1G21240	AT1G61790	AT1G16810	AT1G45035	AT1G30620	AT5G07860	AT1G13530	AT1G23052
	AT2G21188	AT2G38820	AT2G35635	AT2G44740	AT2G22780	AT2G38840	AT2G26530	AT2G25200			AT1G53887	AT1G58420			AT1G23440	AT2G02370	AT1G23730	AT2G01029	AT1G21270	AT1G61850	AT1G16840	AT1G45332	AT1G72060	AT1G12220	AT1G13540	AT1G23130
	AT2G22370	AT2G39110	AT2G36080	AT2G44790	AT2G23770	AT2G38970	AT2G26710	AT2G26030			AT1G54000	AT1G60070			AT1G23730	AT2G02710	AT1G23830	AT2G01040	AT1G21370	AT1G62260	AT1G16890	AT1G47310	AT2G15042	AT2G18670	AT1G13550	AT1G23390
	AT2G22475	AT2G39360	AT2G36310	AT2G44850	AT2G23820	AT2G39110	AT2G27050	AT2G27050			AT1G54090	AT1G60970			AT1G23830	AT2G02960	AT1G23840	AT2G01060	AT1G21390	AT1G62810	AT1G17080	AT1G47360	AT5G38250	AT3G49790	AT1G13570	AT1G23490
	AT2G22780	AT2G39700	AT2G36370	AT2G46030	AT2G23890	AT2G39630	AT2G27330	AT2G27460			AT1G54130	AT1G61000			AT1G23840	AT2G03680	AT1G23870	AT2G01720	AT1G21400	AT1G63270	AT1G17140	AT1G47480	AT3G10120	AT2G23110	AT1G13700	AT1G23510
	AT2G22880	AT2G39750	AT2G36530	AT2G46490	AT2G24165	AT2G39700	AT2G27720	AT2G27510			AT1G54250	AT1G61030			AT1G23870	AT2G03760	AT1G23960	AT2G02050	AT1G21450	AT1G63350	AT1G17145	AT1G47860	AT1G05180	AT1G70520	AT1G13750	AT1G23840
	AT2G23090	AT2G39830	AT2G36780	AT2G46540	AT2G24300	AT2G39725	AT2G27830	AT2G27830			AT1G54410	AT1G61120			AT1G23960	AT2G04550	AT1G24050	AT2G02110	AT1G21520	AT1G63740	AT1G17147	AT1G47890	AT3G45300	AT4G29735	AT1G13830	AT1G23870
	AT2G24165	AT2G40180	AT2G36792	AT2G47600	AT2G24550	AT2G39750	AT2G28370	AT2G28710			AT1G54440	AT1G61160			AT1G24145	AT2G04690	AT1G24140	AT2G02370	AT1G21670	AT1G63800	AT1G17160	AT1G48210	AT1G17600	AT4G29190	AT1G13980	AT1G23900
	AT2G24300	AT2G40390	AT2G37460	AT2G47700	AT2G24755	AT2G40340	AT2G28400	AT2G28760			AT1G54580	AT1G61255			AT1G24150	AT2G05160	AT1G24145	AT2G02590	AT1G21680	AT1G64370	AT1G17240	AT1G48280	AT2G24160	AT4G16000	AT1G13990	AT1G24090
	AT2G24755	AT2G40435	AT2G37660	AT2G47730	AT2G25450	AT2G40435	AT2G29470	AT2G29490			AT1G55080	AT1G61610			AT1G24440	AT2G05240	AT1G24150	AT2G02710	AT1G21770	AT1G64460	AT1G17250	AT1G48605	AT3G26210	AT3G55840	AT1G14000	AT1G24145
	AT2G25000	AT2G40730	AT2G37790	AT2G48030	AT2G25737	AT2G40610	AT2G29670	AT2G30710			AT1G55130	AT1G61780			AT1G25220	AT2G06025	AT1G24190	AT2G02810	AT1G22040	AT1G64470	AT1G17290	AT1G48760	AT3G28450	AT1G15020	AT1G14010	AT1G24150
	AT2G25180	AT2G40740	AT2G38170	AT3G01350	AT2G26260	AT2G40860	AT2G29680	AT2G30920			AT1G55760	AT1G62040			AT1G25230	AT2G06095	AT1G24400	AT2G02960	AT1G22180	AT1G65850	AT1G17330	AT1G49000	AT4G15233	AT1G02610	AT1G14070	AT1G24400
	AT2G25280	AT2G40830	AT2G38530	AT3G01450	AT2G26710	AT2G41150	AT2G29690	AT2G31130			AT1G55790	AT1G62330			AT1G25275	AT2G06490	AT1G24440	AT2G03120	AT1G22250	AT1G66040	AT1G17340	AT1G49050	AT5G25350	AT4G36970	AT1G14080	AT1G24440
	AT2G25440	AT2G40840	AT2G38580	AT3G02170	AT2G27050	AT2G42280	AT2G30110	AT2G31510			AT1G56010	AT1G62370			AT1G25400	AT2G06740	AT1G24530	AT2G03220	AT1G22280	AT1G66680	AT1G17430	AT1G49230	AT5G56180	AT5G46871	AT1G14170	AT1G24450
	AT2G25450	AT2G40860	AT2G38820	AT3G02370	AT2G27330	AT2G42640	AT2G30410	AT2G31751			AT1G56230	AT1G62430			AT1G25500	AT2G06790	AT1G25220	AT2G03760	AT1G22360	AT1G66780	AT1G17450	AT1G49480	AT1G80960	AT3G47160	AT1G14205	AT1G24460
	AT2G25900	AT2G40880	AT2G39410	AT3G02700	AT2G27460	AT2G43120	AT2G30570	AT2G32020			AT1G57590	AT1G62570			AT1G25560	AT2G06930	AT1G25230	AT2G04690	AT1G22500	AT1G66960	AT1G17455	AT1G49720	AT4G05060	AT4G35750	AT1G14260	AT1G24470
	AT2G26010	AT2G41150	AT2G39460	AT3G03180	AT2G27770	AT2G43400	AT2G30600	AT2G32580			AT1G58200	AT1G62820			AT1G25580	AT2G07050	AT1G25275	AT2G04852	AT1G22510	AT1G67000	AT1G17500	AT1G50030	AT3G16785	AT1G09010	AT1G14360	AT1G24510
	AT2G26020	AT2G41450	AT2G39650	AT3G03340	AT2G28370	AT2G43520	AT2G30720	AT2G32660			AT1G58225	AT1G62880			AT1G26120	AT2G07180	AT1G25390	AT2G04865	AT1G22570	AT1G67120	AT1G17530	AT1G50410	AT3G17700	AT1G22890	AT1G14370	AT1G24575
	AT2G26710	AT2G42670	AT2G39705	AT3G03830	AT2G28500	AT2G43580	AT2G30920	AT2G32910			AT1G58300	AT1G63000			AT1G26130	AT2G07360	AT1G25400	AT2G04900	AT1G22620	AT1G67140	AT1G17600	AT1G50430	AT3G48780	AT3G13062	AT1G14380	AT1G25400
	AT2G27310	AT2G42760	AT2G39750	AT3G03850	AT2G29110	AT2G43680	AT2G31580	AT2G32980			AT1G58420	AT1G63090			AT1G26200	AT2G07750	AT1G25540	AT2G05120	AT1G22650	AT1G67860	AT1G17610	AT1G50520	AT3G10500	AT2G14080	AT1G14400	AT1G25480
	AT2G27330	AT2G42780	AT2G39900	AT3G04300	AT2G29670	AT2G43760	AT2G32010	AT2G33610			AT1G59560	AT1G63220			AT1G26380	AT2G11290	AT1G25560	AT2G05240	AT1G22860	AT1G67870	AT1G17745	AT1G50740	AT5G27860	AT5G25050	AT1G14480	AT1G25540
	AT2G27660	AT2G43050	AT2G39980	AT3G05170	AT2G29680	AT2G44130	AT2G32020	AT2G33620			AT1G59600	AT1G63750			AT1G26410	AT2G11670	AT1G25580	AT2G05840	AT1G22870	AT1G67970	AT1G17820	AT1G52500	AT1G13000	AT1G23870	AT1G14510	AT1G25550
	AT2G27720	AT2G43180	AT2G40000	AT3G05280	AT2G30050	AT2G44850	AT2G32170	AT2G35240			AT1G59620	AT1G63800			AT1G26420	AT2G13170	AT1G26130	AT2G06025	AT1G22890	AT1G68000	AT1G17890	AT1G52780	AT5G58220	AT2G15900	AT1G14540	AT1G25560
	AT2G28160	AT2G43330	AT2G40640	AT3G05510	AT2G30110	AT2G45810	AT2G32200	AT2G35630			AT1G59990	AT1G64190			AT1G26440	AT2G14080	AT1G26200	AT2G06230	AT1G23052	AT1G68020	AT1G18160	AT1G53110	AT1G33610	AT5G64410	AT1G14570	AT1G25580
	AT2G28370	AT2G43400	AT2G40970	AT3G05760	AT2G30410	AT2G46490	AT2G32550	AT2G35738			AT1G60140	AT1G64200			AT1G26670	AT2G14740	AT1G26380	AT2G06740	AT1G23060	AT1G68110	AT1G18210	AT1G53320	AT1G78460	AT5G57630	AT1G14640	AT1G26090
	AT2G28400	AT2G43520	AT2G41510	AT3G06370	AT2G30600	AT2G46505	AT2G34420	AT2G36060			AT1G60730	AT1G64563			AT1G26690	AT2G15880	AT1G26410	AT2G06930	AT1G23090	AT1G68140	AT1G18260	AT1G53350	AT1G21670	AT3G12490	AT1G14660	AT1G26130
	AT2G28500	AT2G43620	AT2G42310	AT3G06470	AT2G30920	AT2G46540	AT2G34480	AT2G36305			AT1G60780	AT1G64572			AT1G27180	AT2G15890	AT1G26420	AT2G06980	AT1G23120	AT1G68600	AT1G18382	AT1G53400	AT5G66210	AT5G02020	AT1G14670	AT1G26200
	AT2G28755	AT2G43680	AT2G42320	AT3G07280	AT2G31200	AT2G46700	AT2G35320	AT2G36320			AT1G60940	AT1G64750			AT1G27290	AT2G15900	AT1G26440	AT2G07360	AT1G23130	AT1G69220	AT1G18390	AT1G53710	AT5G16370	AT1G68000	AT1G14740	AT1G26300
	AT2G29110	AT2G43760	AT2G42480	AT3G07350	AT2G31580	AT2G47600	AT2G35635	AT2G36810			AT1G61240	AT1G65000			AT1G27310	AT2G16050	AT1G26640	AT2G07750	AT1G23510	AT1G69350	AT1G18470	AT1G53770	AT1G67970	AT4G21810	AT1G14790	AT1G26440
	AT2G29120	AT2G44383	AT2G42490	AT3G07800	AT2G32010	AT2G47700	AT2G35780	AT2G37035			AT1G61260	AT1G65410			AT1G27330	AT2G16310	AT1G26670	AT2G09960	AT1G23830	AT1G69360	AT1G18570	AT1G54115	AT4G31800	AT2G39400	AT1G14860	AT1G26460
	AT2G29470	AT2G44740	AT2G42590	AT3G07930	AT2G32020	AT2G47960	AT2G36080	AT2G37550			AT1G61520	AT1G65483			AT1G27450	AT2G16640	AT1G26690	AT2G10040	AT1G23840	AT1G69780	AT1G18690	AT1G54170	AT2G36680	AT2G26570	AT1G14870	AT1G26550
	AT2G29680	AT2G44790	AT2G42600	AT3G07940	AT2G32170	AT3G01090	AT2G36310	AT2G38010			AT1G62430	AT1G65500			AT1G28070	AT2G16710	AT1G27180	AT2G11290	AT1G23850	AT1G69850	AT1G18720	AT1G54210	AT1G66590	AT3G50500	AT1G14880	AT1G26580
	AT2G30050	AT2G44850	AT2G42610	AT3G08860	AT2G32550	AT3G01150	AT2G36380	AT2G38740			AT1G62810	AT1G65730			AT1G28190	AT2G17450	AT1G27330	AT2G11670	AT1G23960	AT1G69890	AT1G18745	AT1G54320	AT5G06860	AT1G77660	AT1G14910	AT1G26670
	AT2G30060	AT2G45260	AT2G42640	AT3G08890	AT2G32650	AT3G01360	AT2G36530	AT2G38840			AT1G62820	AT1G65845			AT1G28260	AT2G17560	AT1G27450	AT2G12490	AT1G24145	AT1G70150	AT1G18860	AT1G54360	AT2G31810	AT2G32800	AT1G15020	AT1G26740
	AT2G30110	AT2G46490	AT2G42680	AT3G10020	AT2G32850	AT3G01450	AT2G36770	AT2G39000			AT1G63220	AT1G65850			AT1G28280	AT2G17880	AT1G27770	AT2G13170	AT1G24150	AT1G70160	AT1G18890	AT1G54923	AT2G02010		AT1G15030	AT1G26800
	AT2G30190	AT2G46505	AT2G42960	AT3G10310	AT2G32970	AT3G01460	AT2G36780	AT2G39110			AT1G63690	AT1G65960			AT1G28330	AT2G17920	AT1G28070	AT2G13260	AT1G24400	AT1G70420	AT1G18910	AT1G54926	AT1G32790		AT1G15110	AT1G26830
	AT2G30720	AT2G46540	AT2G43760	AT3G10480	AT2G33020	AT3G01910	AT2G36792	AT2G39700			AT1G63720	AT1G66173			AT1G28540	AT2G18290	AT1G28190	AT2G13810	AT1G24440	AT1G70518	AT1G19020	AT1G56060	AT2G29400		AT1G15120	AT1G27100
	AT2G30920	AT3G01150	AT2G43870	AT3G10490	AT2G33490	AT3G02170	AT2G37460	AT2G39725			AT1G63860	AT1G66480			AT1G28580	AT2G18670	AT1G28260	AT2G14040	AT1G24450	AT1G70520	AT1G19130	AT1G56190	AT4G37640		AT1G15125	AT1G27180
	AT2G31200	AT3G01350	AT2G44210	AT3G10660	AT2G33580	AT3G02370	AT2G37470	AT2G39750			AT1G63900	AT1G67300			AT1G29060	AT2G18700	AT1G28280	AT2G14080	AT1G24460	AT1G70530	AT1G19240	AT1G56220	AT5G41750		AT1G15130	AT1G27290
	AT2G31300	AT3G01910	AT2G44383	AT3G10730	AT2G34010	AT3G02700	AT2G38170	AT2G40190			AT1G64460	AT1G67325			AT1G29240	AT2G18750	AT1G28330	AT2G14255	AT1G24530	AT1G70820	AT1G19270	AT1G56280	AT3G14470		AT1G15175	AT1G27300
	AT2G32020	AT3G02700	AT2G44520	AT3G11280	AT2G34150	AT3G02780	AT2G38260	AT2G40390			AT1G64470	AT1G67420			AT1G29310	AT2G19810	AT1G28380	AT2G14620	AT1G25220	AT1G70980	AT1G19310	AT1G56460	AT1G56060		AT1G15240	AT1G27310
	AT2G32100	AT3G03340	AT2G44740	AT3G11590	AT2G34430	AT3G02800	AT2G38530	AT2G40435			AT1G65250	AT1G67820			AT1G29860	AT2G20050	AT1G28580	AT2G14740	AT1G25275	AT1G71080	AT1G19360	AT1G56540	AT5G12390		AT1G15350	AT1G27450
	AT2G32170	AT3G03773	AT2G45600	AT3G11650	AT2G34480	AT3G03340	AT2G38580	AT2G40810			AT1G65390	AT1G67900			AT1G30200	AT2G20360	AT1G29240	AT2G14878	AT1G25280	AT1G71180	AT1G19660	AT1G56550	AT5G52900		AT1G15370	AT1G27530
	AT2G32190	AT3G03890	AT2G45810	AT3G11780	AT2G34650	AT3G03773	AT2G38710	AT2G40830			AT1G65500	AT1G67950			AT1G30370	AT2G20420	AT1G29290	AT2G15240	AT1G25400	AT1G71220	AT1G19910	AT1G58030	AT1G53770		AT1G15380	AT1G27600
	AT2G32200	AT3G04300	AT2G46650	AT3G11890	AT2G35070	AT3G03990	AT2G38820	AT2G40860			AT1G65610	AT1G68190			AT1G30420	AT2G21240	AT1G29310	AT2G15890	AT1G25500	AT1G71440	AT1G19960	AT1G58180	AT1G27450		AT1G15400	AT1G27650
	AT2G32560	AT3G04605	AT2G47600	AT3G11930	AT2G35240	AT3G04600	AT2G38870	AT2G40880			AT1G65690	AT1G68200			AT1G30540	AT2G22680	AT1G29690	AT2G15900	AT1G25520	AT1G71520	AT1G20050	AT1G58190	AT2G19130		AT1G15520	AT1G28070
	AT2G32580	AT3G05120	AT3G01175	AT3G12200	AT2G35780	AT3G04740	AT2G39380	AT2G41150			AT1G65960	AT1G68310			AT1G30620	AT2G23110	AT1G29860	AT2G16600	AT1G25560	AT1G71890	AT1G20110	AT1G58200	AT5G10860		AT1G15530	AT1G28110
	AT2G32970	AT3G05500	AT3G01390	AT3G12300	AT2G36080	AT3G05170	AT2G39410	AT2G41450			AT1G65970	AT1G68330			AT1G30640	AT2G23290	AT1G29970	AT2G16680	AT1G25580	AT1G72060	AT1G20190	AT1G58300	AT1G51920		AT1G15670	AT1G28230
	AT2G33370	AT3G05510	AT3G01690	AT3G12380	AT2G36780	AT3G05510	AT2G39518	AT2G41830			AT1G66090	AT1G68390			AT1G30730	AT2G23310	AT1G30000	AT2G16710	AT1G26200	AT1G72160	AT1G20225	AT1G59580	AT2G40420		AT1G15740	AT1G28250
	AT2G33580	AT3G06070	AT3G02080	AT3G12600	AT2G36792	AT3G05545	AT2G39650	AT2G42280			AT1G66160	AT1G68840			AT1G30755	AT2G23320	AT1G30200	AT2G16900	AT1G26380	AT1G72830	AT1G20620	AT1G59590	AT3G04670		AT1G15790	AT1G28260
	AT2G34480	AT3G06080	AT3G02150	AT3G12680	AT2G37160	AT3G05680	AT2G39750	AT2G42670			AT1G66173	AT1G68920			AT1G30757	AT2G23810	AT1G30370	AT2G17115	AT1G26410	AT1G72840	AT1G20630	AT1G59600	AT1G61180		AT1G15800	AT1G28330
	AT2G34620	AT3G07350	AT3G02710	AT3G13030	AT2G37680	AT3G06070	AT2G39900	AT2G42760			AT1G66580	AT1G69030			AT1G30820	AT2G24160	AT1G30420	AT2G17200	AT1G26420	AT1G72860	AT1G20693	AT1G59610	AT4G02380		AT1G15880	AT1G28580
	AT2G34650	AT3G07790	AT3G03100	AT3G13560	AT2G37790	AT3G06080	AT2G39910	AT2G42780			AT1G66900	AT1G69370			AT1G30825	AT2G24240	AT1G30540	AT2G17420	AT1G26440	AT1G73480	AT1G20760	AT1G59620	AT4G39270		AT1G15890	AT1G29240
	AT2G35070	AT3G07930	AT3G03590	AT3G13850	AT2G38170	AT3G06420	AT2G39980	AT2G43060			AT1G66920	AT1G69390			AT1G30900	AT2G24550	AT1G30620	AT2G17920	AT1G26550	AT1G73680	AT1G20770	AT1G59900	AT1G57990		AT1G15910	AT1G29310
	AT2G35635	AT3G07940	AT3G03640	AT3G14067	AT2G38260	AT3G06470	AT2G40190	AT2G43120			AT1G66960	AT1G69485			AT1G31290	AT2G25070	AT1G30640	AT2G18280	AT1G26580	AT1G74088	AT1G20780	AT1G59990	AT3G04720		AT1G16030	AT1G29715
	AT2G35780	AT3G08890	AT3G03820	AT3G15290	AT2G38530	AT3G06780	AT2G40640	AT2G43330			AT1G67000	AT1G69510			AT1G32120	AT2G25090	AT1G30700	AT2G18330	AT1G26620	AT1G75040	AT1G20840	AT1G60140	AT5G40780		AT1G16090	AT1G29800
	AT2G35930	AT3G09900	AT3G03860	AT3G15358	AT2G38580	AT3G07100	AT2G40860	AT2G43400			AT1G67050	AT1G69740			AT1G32150	AT2G25200	AT1G30720	AT2G18670	AT1G26670	AT1G75140	AT1G20890	AT1G60220	AT1G74280		AT1G16110	AT1G29860
	AT2G36080	AT3G10030	AT3G03990	AT3G15450	AT2G38790	AT3G07350	AT2G40970	AT2G43620			AT1G67140	AT1G69780			AT1G32170	AT2G25450	AT1G30730	AT2G18700	AT1G26930	AT1G75220	AT1G20970	AT1G60490	AT4G36090		AT1G16130	AT1G29970
	AT2G36310	AT3G10130	AT3G04060	AT3G15540	AT2G38820	AT3G07480	AT2G41380	AT2G43680			AT1G67190	AT1G69790			AT1G32210	AT2G25490	AT1G30755	AT2G19520	AT1G27020	AT1G75380	AT1G20980	AT1G61100	AT4G30060		AT1G16150	AT1G30000
	AT2G36370	AT3G10260	AT3G04070	AT3G15640	AT2G39410	AT3G07800	AT2G42210	AT2G43760			AT1G67350	AT1G69850			AT1G32340	AT2G25735	AT1G30757	AT2G19790	AT1G27090	AT1G75420	AT1G21000	AT1G61140	AT5G58787		AT1G16180	AT1G30220
	AT2G36380	AT3G10390	AT3G04090	AT3G17820	AT2G39460	AT3G07930	AT2G42230	AT2G44210			AT1G67500	AT1G70150			AT1G32460	AT2G26190	AT1G30820	AT2G19810	AT1G27170	AT1G75830	AT1G21100	AT1G61170	AT1G15890		AT1G16240	AT1G30270
	AT2G36770	AT3G10480	AT3G05100	AT3G17900	AT2G39650	AT3G07940	AT2G42310	AT2G44740			AT1G67900	AT1G70290			AT1G32540	AT2G26260	AT1G30825	AT2G20050	AT1G27180	AT1G76580	AT1G21110	AT1G61180	AT1G79680		AT1G16250	AT1G30370
	AT2G36780	AT3G10490	AT3G05420	AT3G18035	AT2G39750	AT3G08590	AT2G42490	AT2G44850			AT1G67920	AT1G70330			AT1G32580	AT2G26560	AT1G30900	AT2G20060	AT1G27450	AT1G76590	AT1G21120	AT1G61250	AT5G18310		AT1G16260	AT1G30460
	AT2G36800	AT3G10730	AT3G06070	AT3G18140	AT2G39900	AT3G08860	AT2G42590	AT2G45170			AT1G67940	AT1G70490			AT1G32700	AT2G26570	AT1G31540	AT2G20360	AT1G27530	AT1G76710	AT1G21130	AT1G61350	AT1G21770		AT1G16420	AT1G30810
	AT2G36900	AT3G11590	AT3G06370	AT3G18215	AT2G39910	AT3G09390	AT2G42600	AT2G45810			AT1G67960	AT1G70581			AT1G32790	AT2G26890	AT1G31550	AT2G20390	AT1G27630	AT1G76940	AT1G21170	AT1G61420	AT3G56720		AT1G16470	AT1G30820
	AT2G37130	AT3G11650	AT3G06590	AT3G18410	AT2G39920	AT3G10310	AT2G42610	AT2G46030			AT1G67980	AT1G70740			AT1G32920	AT2G27310	AT1G31580	AT2G20420	AT1G27750	AT1G77000	AT1G21200	AT1G61430	AT3G28850		AT1G16500	AT1G30825
	AT2G37460	AT3G11780	AT3G07110	AT3G21060	AT2G40000	AT3G10390	AT2G42640	AT2G46490			AT1G68190	AT1G70750			AT1G33030	AT2G27500	AT1G32120	AT2G20530	AT1G27770	AT1G77130	AT1G21240	AT1G61460	AT2G28120		AT1G16510	AT1G30890
	AT2G37470	AT3G11890	AT3G07350	AT3G21350	AT2G40190	AT3G10550	AT2G42700	AT2G46505			AT1G68330	AT1G70820			AT1G33050	AT2G27830	AT1G32130	AT2G21240	AT1G28070	AT1G77210	AT1G21250	AT1G61480	AT1G21370		AT1G16540	AT1G31290
	AT2G37620	AT3G12200	AT3G07525	AT3G21351	AT2G40970	AT3G11100	AT2G42960	AT2G46540			AT1G68620	AT1G70940			AT1G33055	AT2G28110	AT1G32210	AT2G21410	AT1G28190	AT1G77220	AT1G21270	AT1G61690	AT3G49350		AT1G16560	AT1G31460
	AT2G37680	AT3G12300	AT3G07640	AT3G21420	AT2G41510	AT3G11280	AT2G42980	AT2G47600			AT1G68680	AT1G71030			AT1G33420	AT2G28120	AT1G32260	AT2G21850	AT1G28230	AT1G77460	AT1G21310	AT1G61790	AT4G02340		AT1G16670	AT1G31550
	AT2G38170	AT3G12650	AT3G07940	AT3G21781	AT2G42210	AT3G11590	AT2G43400	AT2G47700			AT1G68765	AT1G71410			AT1G33475	AT2G28210	AT1G32340	AT2G21870	AT1G28250	AT1G77660	AT1G21370	AT1G62300	AT3G15358		AT1G16700	AT1G31835
	AT2G38260	AT3G13550	AT3G08510	AT3G22425	AT2G42480	AT3G11650	AT2G43760	AT2G47960			AT1G68820	AT1G71440			AT1G33610	AT2G28630	AT1G32460	AT2G22480	AT1G28260	AT1G78270	AT1G21380	AT1G62422	AT5G26170		AT1G16710	AT1G31870
	AT2G38530	AT3G14750	AT3G09860	AT3G22930	AT2G42490	AT3G11890	AT2G43870	AT2G47970			AT1G68840	AT1G71530			AT1G33720	AT2G28660	AT1G32540	AT2G23110	AT1G28280	AT1G78420	AT1G21390	AT1G62580	AT1G19270		AT1G16810	AT1G32120
	AT2G38580	AT3G15020	AT3G09900	AT3G23030	AT2G42590	AT3G11960	AT2G44210	AT3G01350			AT1G69030	AT1G71865			AT1G33770	AT2G28840	AT1G32580	AT2G23310	AT1G28320	AT1G78460	AT1G21400	AT1G63740	AT4G23280		AT1G16840	AT1G32130
	AT2G38710	AT3G15290	AT3G10815	AT3G23080	AT2G42600	AT3G12200	AT2G44350	AT3G01450			AT1G69360	AT1G71880			AT1G33950	AT2G29020	AT1G32700	AT2G23490	AT1G28330	AT1G78830	AT1G21450	AT1G63770	AT3G26500		AT1G16890	AT1G32172
	AT2G38790	AT3G15358	AT3G10930	AT3G23480	AT2G42640	AT3G12300	AT2G44500	AT3G01910			AT1G69370	AT1G71890			AT1G33960	AT2G29080	AT1G32790	AT2G23810	AT1G28380	AT1G78920	AT1G21520	AT1G63830	AT5G41180		AT1G16930	AT1G32210
	AT2G38820	AT3G15610	AT3G11240	AT3G23635	AT2G42680	AT3G12680	AT2G44520	AT3G02370			AT1G69410	AT1G71940			AT1G33970	AT2G29340	AT1G32920	AT2G24200	AT1G28520	AT1G78955	AT1G21525	AT1G64280	AT5G11910		AT1G17080	AT1G32230
	AT2G38870	AT3G17250	AT3G11340	AT3G25990	AT2G42960	AT3G13290	AT2G44740	AT3G02700			AT1G69490	AT1G71970			AT1G33980	AT2G29670	AT1G33030	AT2G24240	AT1G28580	AT1G79210	AT1G21610	AT1G64385	AT1G51890		AT1G17140	AT1G32260
	AT2G39380	AT3G17820	AT3G11510	AT3G26510	AT2G43570	AT3G13410	AT2G45600	AT3G03140			AT1G69510	AT1G72010			AT1G33990	AT2G29940	AT1G33050	AT2G24550	AT1G29240	AT1G79390	AT1G21670	AT1G64400	AT1G74170		AT1G17145	AT1G32330
	AT2G39410	AT3G17900	AT3G11570	AT3G26890	AT2G43640	AT3G14067	AT2G45810	AT3G03180			AT1G69530	AT1G72220			AT1G34150	AT2G30395	AT1G33140	AT2G24765	AT1G29280	AT1G79670	AT1G21680	AT1G64405	AT2G40095		AT1G17147	AT1G32340
	AT2G39460	AT3G18140	AT3G11590	AT3G27310	AT2G43760	AT3G14750	AT2G46540	AT3G03340			AT1G69620	AT1G72450			AT1G34180	AT2G30770	AT1G33250	AT2G25070	AT1G29357	AT1G80180	AT1G21720	AT1G64460	AT5G41761		AT1G17160	AT1G32360
	AT2G39518	AT3G18770	AT3G12680	AT3G27500	AT2G43820	AT3G15450	AT2G46650	AT3G03773			AT1G69780	AT1G72660			AT1G34220	AT2G30970	AT1G33420	AT2G25090	AT1G29395	AT1G80310	AT1G21750	AT1G64610	AT3G51390		AT1G17240	AT1G32490
	AT2G39650	AT3G19390	AT3G13560	AT3G27930	AT2G43870	AT3G15540	AT2G47190	AT3G03790			AT1G69830	AT1G72690			AT1G34300	AT2G31060	AT1G33590	AT2G25520	AT1G29400	AT1G80420	AT1G21770	AT1G64880	AT1G72680		AT1G17250	AT1G32530
	AT2G39750	AT3G19520	AT3G13610	AT3G28180	AT2G44060	AT3G15640	AT2G47600	AT3G03850			AT1G69900	AT1G72710			AT1G34370	AT2G31400	AT1G33600	AT2G25737	AT1G29715	AT1G80440	AT1G21900	AT1G64890	AT4G20110		AT1G17290	AT1G32580
	AT2G40190	AT3G20290	AT3G13672	AT3G28720	AT2G44380	AT3G15660	AT3G01090	AT3G04300			AT1G69910	AT1G72820			AT1G34380	AT2G31800	AT1G33610	AT2G25970	AT1G29800	AT1G80460	AT1G22040	AT1G65270	AT3G15630		AT1G17330	AT1G32700
	AT2G40205	AT3G21060	AT3G13677	AT3G29035	AT2G44383	AT3G17250	AT3G01360	AT3G04605			AT1G69930	AT1G72840			AT1G34760	AT2G31945	AT1G33720	AT2G26400	AT1G29860	AT1G80510	AT1G22070	AT1G65410	AT2G46220		AT1G17340	AT1G32740
	AT2G40270	AT3G21351	AT3G13720	AT3G29330	AT2G44610	AT3G17820	AT3G01390	AT3G04740			AT1G69980	AT1G72855			AT1G35210	AT2G32520	AT1G33770	AT2G26560	AT1G29970	AT1G80600	AT1G22180	AT1G65484	AT5G67480		AT1G17410	AT1G32928
	AT2G40640	AT3G21360	AT3G14220	AT3G29670	AT2G44740	AT3G17850	AT3G01690	AT3G05040			AT1G70290	AT1G72870			AT1G35230	AT2G32730	AT1G33970	AT2G26570	AT1G30200	AT1G80650	AT1G22200	AT1G65800	AT5G27920		AT1G17430	AT1G32950
	AT2G41110	AT3G21420	AT3G14610	AT3G30620	AT2G45240	AT3G17900	AT3G02080	AT3G05170			AT1G70300	AT1G72950			AT1G35580	AT2G32800	AT1G33980	AT2G27020	AT1G30270	AT1G80850	AT1G22250	AT1G65845	AT2G17705		AT1G17450	AT1G33050
	AT2G41380	AT3G21430	AT3G14930	AT3G30775	AT2G45600	AT3G18035	AT3G02460	AT3G05280			AT1G70350	AT1G73720			AT1G35612	AT2G33120	AT1G33990	AT2G27310	AT1G30370	AT1G80890	AT1G22280	AT1G66410	AT4G16130		AT1G17455	AT1G33140
	AT2G41410	AT3G22110	AT3G15110	AT3G44280	AT2G45810	AT3G18140	AT3G02550	AT3G05510			AT1G70490	AT1G73750			AT1G35710	AT2G33150	AT1G34150	AT2G28110	AT1G30420	AT1G80920	AT1G22300	AT1G66910	AT3G10915		AT1G17500	AT1G33410
	AT2G41510	AT3G22425	AT3G15540	AT3G45390	AT2G46180	AT3G18215	AT3G02650	AT3G05545			AT1G70740	AT1G73820			AT1G35720	AT2G35110	AT1G34180	AT2G28120	AT1G30540	AT1G80960	AT1G22360	AT1G66960	AT3G22060		AT1G17530	AT1G33420
	AT2G41705	AT3G22430	AT3G15610	AT3G46660	AT2G46550	AT3G18990	AT3G02800	AT3G05680			AT1G70800	AT1G73830			AT1G36060	AT2G35680	AT1G34190	AT2G28210	AT1G30620	AT2G01060	AT1G22400	AT1G66970	AT2G31955		AT1G17590	AT1G33475
	AT2G42320	AT3G22930	AT3G15660	AT3G47300	AT2G47210	AT3G20280	AT3G02820	AT3G06070			AT1G70940	AT1G73875			AT1G36070	AT2G35980	AT1G34220	AT2G28630	AT1G30640	AT2G01340	AT1G22500	AT1G66980	AT5G27830		AT1G17600	AT1G33590
	AT2G42360	AT3G23030	AT3G17430	AT3G47560	AT2G47600	AT3G20670	AT3G03100	AT3G06400			AT1G71260	AT1G73920			AT1G36380	AT2G36080	AT1G34300	AT2G29400	AT1G30700	AT2G01440	AT1G22510	AT1G67120	AT1G19310		AT1G17610	AT1G33600
	AT2G42480	AT3G23080	AT3G17860	AT3G47620	AT2G47730	AT3G21060	AT3G03180	AT3G06420			AT1G71310	AT1G74240			AT1G42990	AT2G36170	AT1G34370	AT2G29940	AT1G30720	AT2G01490	AT1G22570	AT1G67310	AT1G67310		AT1G17640	AT1G33610
	AT2G42490	AT3G23480	AT3G18030	AT3G47850	AT3G01090	AT3G21350	AT3G03590	AT3G06470			AT1G71410	AT1G74930			AT1G43130	AT2G36310	AT1G34380	AT2G30110	AT1G30730	AT2G01720	AT1G22620	AT1G67560	AT5G62630		AT1G17745	AT1G33720
	AT2G42590	AT3G23635	AT3G18050	AT3G47930	AT3G01170	AT3G21360	AT3G03850	AT3G06780			AT1G71440	AT1G75370			AT1G44130	AT2G36320	AT1G34420	AT2G30400	AT1G30755	AT2G02180	AT1G22650	AT1G67800	AT4G37370		AT1G17820	AT1G33790
	AT2G42610	AT3G24982	AT3G18140	AT3G47990	AT3G01390	AT3G21420	AT3G03860	AT3G07100			AT1G71865	AT1G75420			AT1G44770	AT2G36900	AT1G34760	AT2G30530	AT1G30757	AT2G02410	AT1G22840	AT1G67850	AT5G01560		AT1G17860	AT1G33840
	AT2G42640	AT3G25180	AT3G18170	AT3G48590	AT3G01690	AT3G21430	AT3G04060	AT3G07280			AT1G71890	AT1G75440			AT1G45145	AT2G37160	AT1G35210	AT2G30710	AT1G31130	AT2G02710	AT1G22860	AT1G67860	AT2G45200		AT1G17890	AT1G33940
	AT2G42960	AT3G25760	AT3G18740	AT3G48880	AT3G01930	AT3G22110	AT3G04070	AT3G07350			AT1G71950	AT1G75490			AT1G47360	AT2G37550	AT1G35230	AT2G30770	AT1G31570	AT2G02810	AT1G22870	AT1G67920	AT1G56240		AT1G17970	AT1G33950
	AT2G43070	AT3G25770	AT3G19030	AT3G49130	AT3G02080	AT3G22400	AT3G04717	AT3G07640			AT1G71970	AT1G75500			AT1G47420	AT2G37678	AT1G35580	AT2G30970	AT1G32120	AT2G02960	AT1G22890	AT1G67970	AT5G44990		AT1G17980	AT1G33970
	AT2G43150	AT3G25910	AT3G19580	AT3G49160	AT3G02090	AT3G22425	AT3G04890	AT3G07790			AT1G72160	AT1G76070			AT1G47640	AT2G37950	AT1G35620	AT2G31060	AT1G32130	AT2G03530	AT1G22920	AT1G68000	AT1G20630		AT1G18030	AT1G33980
	AT2G43400	AT3G25990	AT3G19640	AT3G49340	AT3G02650	AT3G22430	AT3G05040	AT3G07930			AT1G72175	AT1G76260			AT1G47650	AT2G38000	AT1G35670	AT2G31400	AT1G32170	AT2G03590	AT1G23090	AT1G68710	AT2G14878		AT1G18160	AT1G34044
	AT2G43570	AT3G26510	AT3G20290	AT3G49570	AT3G02710	AT3G22930	AT3G05420	AT3G08860			AT1G72630	AT1G76320			AT1G47890	AT2G39400	AT1G35710	AT2G31800	AT1G32172	AT2G03760	AT1G23120	AT1G69060	AT1G59870		AT1G18210	AT1G34130
	AT2G43620	AT3G26890	AT3G20390	AT3G50010	AT3G02800	AT3G23030	AT3G06320	AT3G08890			AT1G72830	AT1G76900			AT1G48170	AT2G40000	AT1G36050	AT2G31945	AT1G32340	AT2G04080	AT1G23230	AT1G69270	AT2G01180		AT1G18260	AT1G34150
	AT2G43870	AT3G27260	AT3G22230	AT3G50040	AT3G02820	AT3G23080	AT3G06483	AT3G09320			AT1G72910	AT1G77450			AT1G48210	AT2G40110	AT1G36060	AT2G32730	AT1G32460	AT2G04530	AT1G23260	AT1G69360	AT5G25250		AT1G18270	AT1G34180
	AT2G44060	AT3G27310	AT3G22910	AT3G50270	AT3G03100	AT3G23635	AT3G06500	AT3G09900			AT1G72920	AT1G77480			AT1G48280	AT2G40140	AT1G42990	AT2G32800	AT1G32700	AT2G04690	AT1G23440	AT1G69530	AT3G50470		AT1G18382	AT1G34220
	AT2G44210	AT3G28700	AT3G22942	AT3G50760	AT3G03590	AT3G24200	AT3G06590	AT3G10130			AT1G72940	AT1G78270			AT1G48320	AT2G40410	AT1G43000	AT2G32885	AT1G32790	AT2G04852	AT1G23490	AT1G69890	AT5G65750		AT1G18390	AT1G34300
	AT2G44350	AT3G28720	AT3G23080	AT3G50850	AT3G03640	AT3G26510	AT3G07350	AT3G10310			AT1G73210	AT1G78570			AT1G48370	AT2G40600	AT1G43130	AT2G33040	AT1G32920	AT2G04860	AT1G23510	AT1G70160	AT2G47650		AT1G18470	AT1G34370
	AT2G44380	AT3G29100	AT3G23170	AT3G51040	AT3G03720	AT3G26890	AT3G07790	AT3G10390			AT1G73750	AT1G78670			AT1G48605	AT2G41250	AT1G44770	AT2G33120	AT1G32960	AT2G04890	AT1G23830	AT1G70420	AT4G39230		AT1G18570	AT1G34380
	AT2G44383	AT3G29670	AT3G23690	AT3G51110	AT3G03990	AT3G27325	AT3G08510	AT3G10440			AT1G73790	AT1G78890			AT1G49000	AT2G41430	AT1G45145	AT2G33150	AT1G33030	AT2G06025	AT1G23840	AT1G70520	AT4G27460		AT1G18670	AT1G34630
	AT2G44500	AT3G44550	AT3G24830	AT3G52060	AT3G04060	AT3G27500	AT3G08885	AT3G10550			AT1G73830	AT1G78900			AT1G49032	AT2G41750	AT1G47420	AT2G33210	AT1G33050	AT2G07180	AT1G23850	AT1G70530	AT4G18197		AT1G18690	AT1G34760
	AT2G44520	AT3G44970	AT3G25600	AT3G52070	AT3G05100	AT3G27930	AT3G08890	AT3G10730			AT1G73920	AT1G78910			AT1G49050	AT2G43160	AT1G47640	AT2G33630	AT1G33590	AT2G11880	AT1G23900	AT1G70690	AT1G07128		AT1G18700	AT1G35230
	AT2G44610	AT3G45190	AT3G25760	AT3G52570	AT3G05280	AT3G28100	AT3G08940	AT3G11100			AT1G74370	AT1G79440			AT1G49130	AT2G43820	AT1G47860	AT2G33730	AT1G33610	AT2G12210	AT1G23960	AT1G70740	AT3G59700		AT1G18720	AT1G35300
	AT2G44740	AT3G45660	AT3G25780	AT3G52860	AT3G05420	AT3G28180	AT3G09580	AT3G11280			AT1G74650	AT1G79590			AT1G49210	AT2G44130	AT1G47890	AT2G34470	AT1G33720	AT2G12490	AT1G24140	AT1G71040	AT2G39660		AT1G18745	AT1G35580
	AT2G45600	AT3G46660	AT3G26510	AT3G53600	AT3G05710	AT3G28700	AT3G09860	AT3G11590			AT1G74910	AT1G79870			AT1G49300	AT2G44140	AT1G48170	AT2G35010	AT1G33770	AT2G14080	AT1G24145	AT1G71080	AT1G35580		AT1G18773	AT1G35590
	AT2G46150	AT3G47560	AT3G26690	AT3G53960	AT3G05910	AT3G29100	AT3G09900	AT3G11650			AT1G74930	AT1G80110			AT1G49480	AT2G44240	AT1G48210	AT2G35240	AT1G33790	AT2G14260	AT1G24150	AT1G71220	AT4G36210		AT1G18860	AT1G35612
	AT2G46170	AT3G47620	AT3G27230	AT3G54950	AT3G06590	AT3G29330	AT3G10320	AT3G11780			AT1G74940	AT1G80310			AT1G49500	AT2G45030	AT1G48280	AT2G35520	AT1G33840	AT2G14740	AT1G24190	AT1G71270	AT3G50480		AT1G18890	AT1G35620
	AT2G46180	AT3G47850	AT3G27280	AT3G55240	AT3G07060	AT3G29670	AT3G10370	AT3G11960			AT1G75220	AT1G80320			AT1G49720	AT2G45170	AT1G48420	AT2G35680	AT1G33970	AT2G14878	AT1G24440	AT1G71390	AT3G26830		AT1G18910	AT1G35670
	AT2G46400	AT3G48210	AT3G27310	AT3G55440	AT3G07350	AT3G30775	AT3G10815	AT3G12200			AT1G75440	AT1G80400			AT1G49820	AT2G45200	AT1G48430	AT2G35790	AT1G34044	AT2G15042	AT1G24460	AT1G71697	AT5G10870		AT1G19020	AT1G35710
	AT2G46600	AT3G48590	AT3G27500	AT3G55560	AT3G07640	AT3G42050	AT3G10920	AT3G12300			AT1G75460	AT1G80450			AT1G50430	AT2G45810	AT1G49000	AT2G35980	AT1G34150	AT2G15230	AT1G24530	AT1G71860	AT1G75130		AT1G19130	AT1G35720
	AT2G47190	AT3G48880	AT3G27970	AT3G55600	AT3G07790	AT3G42883	AT3G10930	AT3G12380			AT1G75500	AT1G80650			AT1G50480	AT2G45980	AT1G49032	AT2G36310	AT1G34180	AT2G15880	AT1G25220	AT1G72060	AT3G51330		AT1G19240	AT1G36050
	AT2G47390	AT3G49340	AT3G28050	AT3G56580	AT3G08550	AT3G43230	AT3G11570	AT3G12680			AT1G75760	AT1G80670			AT1G50740	AT2G46260	AT1G49050	AT2G36580	AT1G34220	AT2G15890	AT1G25275	AT1G72160	AT1G71697		AT1G19250	AT1G36060
	AT3G01175	AT3G49570	AT3G28100	AT3G57100	AT3G08885	AT3G44600	AT3G11590	AT3G13410			AT1G76100	AT1G80900			AT1G51270	AT2G46330	AT1G49130	AT2G36900	AT1G34260	AT2G15900	AT1G25280	AT1G72330	AT4G23220		AT1G19270	AT1G36200
	AT3G01390	AT3G49880	AT3G28857	AT3G57580	AT3G08890	AT3G45190	AT3G11780	AT3G13772			AT1G76185	AT2G01020			AT1G51790	AT2G46550	AT1G49300	AT2G37160	AT1G34300	AT2G16380	AT1G25390	AT1G72540	AT3G02070		AT1G19310	AT1G36470
	AT3G01830	AT3G50010	AT3G29360	AT3G57870	AT3G08940	AT3G45660	AT3G12145	AT3G14067			AT1G76520	AT2G01100			AT1G51800	AT2G47600	AT1G49480	AT2G37550	AT1G34315	AT2G16640	AT1G25400	AT1G72700	AT5G66880		AT1G19360	AT1G36600
	AT3G01930	AT3G50040	AT3G33225	AT3G58170	AT3G09200	AT3G47540	AT3G13200	AT3G14750			AT1G76600	AT2G01140			AT1G51890	AT2G47690	AT1G49820	AT2G37678	AT1G34370	AT2G16650	AT1G25500	AT1G72710	AT1G34150		AT1G19380	AT1G36620
	AT3G02080	AT3G50070	AT3G43850	AT3G58670	AT3G09580	AT3G47850	AT3G13672	AT3G15358			AT1G76640	AT2G01410			AT1G51920	AT2G47700	AT1G50430	AT2G37690	AT1G34380	AT2G16660	AT1G25520	AT1G73200	AT5G14930		AT1G19510	AT1G36975
	AT3G02090	AT3G50270	AT3G44200	AT3G59010	AT3G09860	AT3G47930	AT3G13677	AT3G15540			AT1G76660	AT2G01420			AT1G52200	AT3G01080	AT1G50570	AT2G38000	AT1G34420	AT2G17110	AT1G25540	AT1G73250	AT1G15880		AT1G19540	AT1G37110
	AT3G02150	AT3G50760	AT3G44260	AT3G59080	AT3G10815	AT3G47990	AT3G14370	AT3G15640			AT1G76680	AT2G01440			AT1G52420	AT3G01175	AT1G50740	AT2G38790	AT1G35210	AT2G17525	AT1G25560	AT1G73480	AT4G35600		AT1G19660	AT1G37801
	AT3G02190	AT3G50850	AT3G44620	AT3G59150	AT3G10930	AT3G48590	AT3G14410	AT3G15660			AT1G76730	AT2G01600			AT1G52600	AT3G01280	AT1G51270	AT2G39050	AT1G35230	AT2G17570	AT1G25580	AT1G73680	AT3G59380		AT1G19770	AT1G37867
	AT3G02360	AT3G51040	AT3G45140	AT3G59750	AT3G11280	AT3G48600	AT3G14930	AT3G16630			AT1G76790	AT2G02050			AT1G52710	AT3G01770	AT1G51620	AT2G39230	AT1G35580	AT2G18250	AT1G25682	AT1G73805	AT3G15770		AT1G19910	AT1G39190
	AT3G02460	AT3G52070	AT3G45960	AT3G59940	AT3G11510	AT3G48880	AT3G15290	AT3G17250			AT1G76930	AT2G02180			AT1G52780	AT3G02150	AT1G51660	AT2G39350	AT1G35620	AT2G18280	AT1G26120	AT1G73810	AT2G25850		AT1G19960	AT1G40123
	AT3G02630	AT3G52570	AT3G46320	AT3G60160	AT3G11570	AT3G49160	AT3G15450	AT3G17590			AT1G76955	AT2G02350			AT1G53110	AT3G02170	AT1G51790	AT2G39400	AT1G35710	AT2G18330	AT1G26130	AT1G74088	AT1G64280		AT1G19968	AT1G42480
	AT3G02710	AT3G52730	AT3G46590	AT3G60170	AT3G12030	AT3G49340	AT3G15500	AT3G17820			AT1G77000	AT2G02480			AT1G53165	AT3G02340	AT1G51800	AT2G39460	AT1G36050	AT2G18390	AT1G26200	AT1G74170	AT4G21400		AT1G20050	AT1G42705
	AT3G02840	AT3G52860	AT3G46600	AT3G60340	AT3G13060	AT3G49400	AT3G15540	AT3G17850			AT1G77350	AT2G02510			AT1G53320	AT3G02520	AT1G51890	AT2G40000	AT1G36060	AT2G18670	AT1G26380	AT1G74350	AT1G30420		AT1G20110	AT1G43130
	AT3G03020	AT3G53570	AT3G46880	AT3G60410	AT3G13062	AT3G49590	AT3G15610	AT3G18035			AT1G77460	AT2G02760			AT1G53330	AT3G02530	AT1G51920	AT2G40110	AT1G36070	AT2G18750	AT1G26410	AT1G74440	AT3G48380		AT1G20190	AT1G43502
	AT3G03180	AT3G53960	AT3G47350	AT3G61060	AT3G13610	AT3G49880	AT3G15640	AT3G18140			AT1G77750	AT2G03310			AT1G53350	AT3G03870	AT1G52200	AT2G40140	AT1G36380	AT2G18876	AT1G26420	AT1G74590	AT1G73030		AT1G20200	AT1G44070
	AT3G03305	AT3G54826	AT3G47540	AT3G61270	AT3G13677	AT3G50060	AT3G16460	AT3G18215			AT1G77765	AT2G03440			AT1G53390	AT3G03950	AT1G52420	AT2G40410	AT1G36940	AT2G19110	AT1G26440	AT1G74680	AT1G18470		AT1G20225	AT1G44510
	AT3G03310	AT3G54950	AT3G48820	AT3G62070	AT3G13720	AT3G50070	AT3G17850	AT3G20060			AT1G77920	AT2G03590			AT1G53400	AT3G03990	AT1G52600	AT2G40435	AT1G42990	AT2G19740	AT1G26550	AT1G75040	AT1G05805		AT1G20350	AT1G44770
	AT3G03820	AT3G55140	AT3G49010	AT3G62220	AT3G14120	AT3G50270	AT3G17910	AT3G20280			AT1G78300	AT2G03690			AT1G53430	AT3G04290	AT1G52780	AT2G40610	AT1G43000	AT2G19810	AT1G26580	AT1G75140	AT5G54080		AT1G20460	AT1G44780
	AT3G04060	AT3G55240	AT3G49160	AT3G62455	AT3G14370	AT3G50520	AT3G18050	AT3G20670			AT1G78370	AT2G03890			AT1G53440	AT3G04670	AT1G53110	AT2G40810	AT1G43130	AT2G20060	AT1G26620	AT1G75200	AT1G29240		AT1G20575	AT1G44800
	AT3G04070	AT3G55440	AT3G49310	AT3G62770	AT3G14910	AT3G50800	AT3G18140	AT3G21060			AT1G78380	AT2G04050			AT1G53580	AT3G05200	AT1G53165	AT2G41250	AT1G43620	AT2G20390	AT1G26640	AT1G75220	AT1G16890		AT1G20620	AT1G45035
	AT3G04090	AT3G55560	AT3G49550	AT3G63000	AT3G14930	AT3G50850	AT3G18170	AT3G21350			AT1G78600	AT2G04550			AT1G53710	AT3G05530	AT1G53170	AT2G41430	AT1G44170	AT2G20530	AT1G26670	AT1G75380	AT1G10210		AT1G20630	AT1G45231
	AT3G04120	AT3G55740	AT3G49940	AT3G63210	AT3G15450	AT3G51010	AT3G18350	AT3G21351			AT1G78660	AT2G05160			AT1G53770	AT3G05680	AT1G53320	AT2G41530	AT1G44770	AT2G20850	AT1G26690	AT1G76320	AT1G15790		AT1G20693	AT1G45332
	AT3G05100	AT3G55970	AT3G50110	AT3G63290	AT3G15500	AT3G51040	AT3G18760	AT3G21360			AT1G78830	AT2G05630			AT1G53810	AT3G06060	AT1G53330	AT2G42400	AT1G45145	AT2G21240	AT1G26740	AT1G76580	AT5G20350		AT1G20760	AT1G47260
	AT3G05420	AT3G56500	AT3G50280	AT3G63440	AT3G15536	AT3G51110	AT3G18770	AT3G21420			AT1G78850	AT2G06050			AT1G53850	AT3G06380	AT1G53350	AT2G42670	AT1G45150	AT2G21250	AT1G26800	AT1G76590	AT2G37950		AT1G20770	AT1G47310
	AT3G05710	AT3G57580	AT3G50550	AT4G00750	AT3G15540	AT3G51990	AT3G19030	AT3G21430			AT1G78900	AT2G07671			AT1G53860	AT3G06470	AT1G53390	AT2G43090	AT1G46554	AT2G21410	AT1G26830	AT1G76700	AT1G71520		AT1G20780	AT1G47360
	AT3G05910	AT3G58170	AT3G50800	AT4G01026	AT3G15610	AT3G52030	AT3G19380	AT3G22110			AT1G79010	AT2G13130			AT1G53910	AT3G06500	AT1G53400	AT2G43820	AT1G47128	AT2G21430	AT1G26930	AT1G76900	AT4G37390		AT1G20840	AT1G47420
	AT3G06370	AT3G58670	AT3G51310	AT4G01330	AT3G15660	AT3G52060	AT3G20290	AT3G22425			AT1G79040	AT2G14170			AT1G54000	AT3G06580	AT1G53430	AT2G43970	AT1G47310	AT2G21840	AT1G26940	AT1G76940	AT5G48620		AT1G20890	AT1G47480
	AT3G06500	AT3G58710	AT3G51600	AT4G01450	AT3G17850	AT3G52070	AT3G20390	AT3G22430			AT1G79450	AT2G14290			AT1G54030	AT3G07390	AT1G53440	AT2G44060	AT1G47330	AT2G21850	AT1G27000	AT1G77000	AT3G02340		AT1G20970	AT1G47603
	AT3G06540	AT3G58760	AT3G51830	AT4G01860	AT3G18030	AT3G52072	AT3G20395	AT3G22930			AT1G79530	AT2G16660			AT1G54090	AT3G07480	AT1G53590	AT2G44140	AT1G47420	AT2G21950	AT1G27020	AT1G77210	AT1G18390		AT1G20980	AT1G47640
	AT3G06590	AT3G59080	AT3G51915	AT4G02330	AT3G18050	AT3G52860	AT3G21610	AT3G23030			AT1G79610	AT2G16740			AT1G54115	AT3G07680	AT1G53625	AT2G44660	AT1G47480	AT2G22300	AT1G27090	AT1G77220	AT1G28190		AT1G21000	AT1G47650
	AT3G06860	AT3G59930	AT3G52070	AT4G02390	AT3G18140	AT3G53020	AT3G22200	AT3G23080			AT1G79940	AT2G16930			AT1G54130	AT3G07780	AT1G53710	AT2G45030	AT1G47640	AT2G22630	AT1G27180	AT1G77350	AT1G21520		AT1G21100	AT1G47860
	AT3G07110	AT3G59940	AT3G52190	AT4G02500	AT3G18170	AT3G53210	AT3G22910	AT3G23110			AT1G79990	AT2G17450			AT1G54150	AT3G07800	AT1G53770	AT2G45170	AT1G47860	AT2G22660	AT1G27310	AT1G77370	AT2G40410		AT1G21110	AT1G47890
	AT3G07600	AT3G60200	AT3G52630	AT4G02540	AT3G18480	AT3G53570	AT3G23250	AT3G23480			AT1G80110	AT2G17500			AT1G54360	AT3G08610	AT1G54090	AT2G45240	AT1G47890	AT2G23110	AT1G27330	AT1G77420	AT1G71800		AT1G21120	AT1G47960
	AT3G07640	AT3G60340	AT3G53150	AT4G03115	AT3G18580	AT3G53650	AT3G24830	AT3G23635			AT1G80310	AT2G17560			AT1G54730	AT3G08650	AT1G54115	AT2G45660	AT1G47960	AT2G23810	AT1G27450	AT1G77460	AT5G05300		AT1G21130	AT1G47980
	AT3G07790	AT3G60410	AT3G53370	AT4G03510	AT3G18760	AT3G53960	AT3G25760	AT3G24315			AT1G80400	AT2G17700			AT1G55450	AT3G08760	AT1G54210	AT2G45790	AT1G48090	AT2G24240	AT1G27530	AT1G77500	AT5G53460		AT1G21170	AT1G48210
	AT3G08510	AT3G61350	AT3G53650	AT4G04409	AT3G19030	AT3G54826	AT3G25770	AT3G25545			AT1G80440	AT2G17880			AT1G55730	AT3G08850	AT1G54320	AT2G45810	AT1G48280	AT2G24550	AT1G27630	AT1G77660	AT5G16170		AT1G21200	AT1G48280
	AT3G08580	AT3G61880	AT3G53870	AT4G05070	AT3G19580	AT3G54950	AT3G25780	AT3G25760			AT1G80600	AT2G18010			AT1G56060	AT3G09020	AT1G54360	AT2G45980	AT1G48370	AT2G24645	AT1G27650	AT1G77765	AT3G47250		AT1G21240	AT1G48410
	AT3G08640	AT3G61930	AT3G54030	AT4G07950	AT3G19640	AT3G55240	AT3G26370	AT3G26380			AT1G80650	AT2G18250			AT1G56145	AT3G09030	AT1G54490	AT2G46260	AT1G48420	AT2G25070	AT1G27770	AT1G78420	AT3G10640		AT1G21250	AT1G48440
	AT3G08885	AT3G62070	AT3G54160	AT4G08330	AT3G20060	AT3G55440	AT3G26470	AT3G26510			AT1G80720	AT2G18650			AT1G56150	AT3G10020	AT1G55450	AT2G46490	AT1G48430	AT2G25170	AT1G27980	AT1G78460	AT1G76590		AT1G21270	AT1G48570
	AT3G09690	AT3G62455	AT3G54270	AT4G08860	AT3G20290	AT3G55480	AT3G26510	AT3G27460			AT1G80830	AT2G18700			AT1G56165	AT3G10250	AT1G55850	AT2G46550	AT1G48490	AT2G25350	AT1G28070	AT1G78550	AT3G63080		AT1G21310	AT1G48605
	AT3G09900	AT3G62650	AT3G54880	AT4G08920	AT3G20390	AT3G55560	AT3G27230	AT3G28180			AT1G80840	AT2G18960			AT1G56220	AT3G10550	AT1G56060	AT2G46620	AT1G48550	AT2G25450	AT1G28110	AT1G78830	AT4G22530		AT1G21326	AT1G48760
	AT3G10320	AT3G63000	AT3G54890	AT4G08950	AT3G20395	AT3G55740	AT3G27310	AT3G28857			AT1G80850	AT2G19120			AT1G56240	AT3G10740	AT1G56140	AT2G46900	AT1G49000	AT2G26190	AT1G28190	AT1G78895	AT1G33030		AT1G21370	AT1G49000
	AT3G10815	AT3G63210	AT3G55440	AT4G09560	AT3G20420	AT3G56580	AT3G27500	AT3G29100			AT1G80860	AT2G19250			AT1G56450	AT3G10985	AT1G56145	AT2G47320	AT1G49032	AT2G26200	AT1G28200	AT1G79000	AT3G28690		AT1G21380	AT1G49050
	AT3G10930	AT4G00200	AT3G55560	AT4G09760	AT3G21420	AT3G56640	AT3G27880	AT3G29670			AT1G80900	AT2G19350			AT1G56460	AT3G11100	AT1G56150	AT2G47470	AT1G49050	AT2G26360	AT1G28240	AT1G79190	AT3G56190		AT1G21390	AT1G49160
	AT3G11280	AT4G00750	AT3G56880	AT4G11150	AT3G22230	AT3G57580	AT3G27970	AT3G42050			AT1G80950	AT2G19830			AT1G56520	AT3G12290	AT1G56220	AT2G47690	AT1G49130	AT2G26560	AT1G28250	AT1G79380	AT1G20760		AT1G21400	AT1G49230
	AT3G11570	AT4G01026	AT3G57260	AT4G11230	AT3G23030	AT3G57750	AT3G28100	AT3G42800			AT2G01140	AT2G20330			AT1G56550	AT3G12490	AT1G56240	AT3G01080	AT1G49300	AT2G26570	AT1G28260	AT1G79440	AT3G19553		AT1G21450	AT1G49480
	AT3G11580	AT4G01330	AT3G57650	AT4G11360	AT3G23080	AT3G57760	AT3G28370	AT3G42883			AT2G01420	AT2G20360			AT1G57630	AT3G12760	AT1G56250	AT3G01280	AT1G49720	AT2G27150	AT1G28280	AT1G79670	AT3G60260		AT1G21520	AT1G49720
	AT3G11590	AT4G01350	AT3G57760	AT4G14270	AT3G23690	AT3G57790	AT3G28857	AT3G43230			AT2G01460	AT2G20370			AT1G57650	AT3G12965	AT1G56340	AT3G01770	AT1G49820	AT2G27310	AT1G28320	AT1G80070	AT5G10610		AT1G21525	AT1G50030
	AT3G11800	AT4G01450	AT3G57790	AT4G14570	AT3G24350	AT3G57870	AT3G28910	AT3G44970			AT2G01490	AT2G20650			AT1G57990	AT3G13062	AT1G56450	AT3G01850	AT1G49850	AT2G27920	AT1G28330	AT1G80180	AT4G14270		AT1G21550	AT1G50410
	AT3G13080	AT4G02330	AT3G57870	AT4G14905	AT3G24830	AT3G58170	AT3G29035	AT3G45660			AT2G01930	AT2G21130			AT1G58180	AT3G13200	AT1G56460	AT3G02090	AT1G50360	AT2G28120	AT1G28380	AT1G80420	AT3G63420		AT1G21610	AT1G50430
	AT3G13200	AT4G02390	AT3G57890	AT4G14990	AT3G25040	AT3G58380	AT3G29130	AT3G46590			AT2G02450	AT2G21190			AT1G58190	AT3G13310	AT1G56540	AT3G02340	AT1G50430	AT2G28210	AT1G28480	AT1G80440	AT2G37980		AT1G21670	AT1G50480
	AT3G13437	AT4G02500	AT3G58120	AT4G15165	AT3G25510	AT3G58670	AT3G29320	AT3G46660			AT2G02540	AT2G21500			AT1G58200	AT3G13430	AT1G56550	AT3G02520	AT1G50480	AT2G28630	AT1G28490	AT1G80460	AT5G01990		AT1G21680	AT1G50520
	AT3G13672	AT4G02540	AT3G59540	AT4G15210	AT3G25717	AT3G59930	AT3G29360	AT3G47610			AT2G02590	AT2G22690			AT1G58235	AT3G14050	AT1G56590	AT3G02530	AT1G50570	AT2G28760	AT1G28520	AT1G80510	AT1G51270		AT1G21720	AT1G50740
	AT3G13677	AT4G02640	AT3G59900	AT4G15520	AT3G26510	AT3G59940	AT3G30775	AT3G47620			AT2G02710	AT2G22830			AT1G58300	AT3G14310	AT1G57630	AT3G02650	AT1G50740	AT2G28830	AT1G28580	AT1G80600	AT3G17410		AT1G21750	AT1G51270
	AT3G14280	AT4G02880	AT3G60070	AT4G15990	AT3G26690	AT3G59950	AT3G43250	AT3G47730			AT2G03220	AT2G22910			AT1G59580	AT3G14430	AT1G57650	AT3G03160	AT1G51270	AT2G28840	AT1G29240	AT1G80650	AT5G55000		AT1G21770	AT1G51650
	AT3G15290	AT4G03115	AT3G60180	AT4G16144	AT3G27280	AT3G60160	AT3G43850	AT3G47850			AT2G03330	AT2G23140			AT1G59590	AT3G15070	AT1G57765	AT3G03330	AT1G51550	AT2G28940	AT1G29310	AT1G80720	AT1G22650		AT1G21830	AT1G52087
	AT3G15536	AT4G04020	AT3G60370	AT4G16265	AT3G27310	AT3G60200	AT3G44160	AT3G47930			AT2G03440	AT2G23370			AT1G59610	AT3G15450	AT1G57990	AT3G03750	AT1G51620	AT2G29080	AT1G29330	AT1G80890	AT3G49780		AT1G21900	AT1G52500
	AT3G15540	AT4G04409	AT3G60480	AT4G16700	AT3G27470	AT3G60240	AT3G44200	AT3G47990			AT2G03620	AT2G23780			AT1G59620	AT3G15500	AT1G58110	AT3G03870	AT1G51645	AT2G29100	AT1G29357	AT1G80920	AT1G70530		AT1G22040	AT1G52780
	AT3G15610	AT4G04790	AT3G61050	AT4G16892	AT3G27500	AT3G60340	AT3G44260	AT3G48590			AT2G03980	AT2G23840			AT1G59870	AT3G15580	AT1G58180	AT3G03950	AT1G51790	AT2G29110	AT1G29400	AT1G80950	AT1G48280		AT1G22070	AT1G52800
	AT3G15710	AT4G05050	AT3G61060	AT4G16920	AT3G27610	AT3G60410	AT3G44620	AT3G48880			AT2G04530	AT2G24160			AT1G60140	AT3G15600	AT1G58190	AT3G03990	AT1G51800	AT2G29340	AT1G29550	AT1G80960	AT2G13810		AT1G22180	AT1G52810
	AT3G15730	AT4G08330	AT3G61180	AT4G17080	AT3G27970	AT3G61350	AT3G44860	AT3G49160			AT2G04550	AT2G24650			AT1G60490	AT3G15630	AT1G58200	AT3G04600	AT1G51850	AT2G29400	AT1G29715	AT2G01029	AT1G44770		AT1G22200	AT1G52850
	AT3G16460	AT4G08540	AT3G61190	AT4G17245	AT3G28910	AT3G62010	AT3G45060	AT3G49340			AT2G04650	AT2G24830			AT1G61150	AT3G15730	AT1G58225	AT3G04670	AT1G51860	AT2G30530	AT1G29850	AT2G01060	AT1G01820		AT1G22250	AT1G53110
	AT3G17860	AT4G08860	AT3G61390	AT4G17470	AT3G29130	AT3G62455	AT3G45140	AT3G49880			AT2G05160	AT2G25200			AT1G61180	AT3G17020	AT1G58300	AT3G04910	AT1G51890	AT2G31020	AT1G29860	AT2G01100	AT5G02290		AT1G22280	AT1G53160
	AT3G18030	AT4G09000	AT3G61470	AT4G17640	AT3G29240	AT3G62770	AT3G45780	AT3G50010			AT2G05210	AT2G25300			AT1G61250	AT3G17850	AT1G58420	AT3G04930	AT1G51920	AT2G31060	AT1G29960	AT2G01650	AT1G61420		AT1G22300	AT1G53165
	AT3G18140	AT4G09140	AT3G61960	AT4G17660	AT3G29370	AT3G63000	AT3G46320	AT3G50060			AT2G05260	AT2G25450			AT1G61360	AT3G17940	AT1G59580	AT3G05000	AT1G51940	AT2G31800	AT1G29970	AT2G01720	AT4G04800		AT1G22360	AT1G53280
	AT3G18170	AT4G09560	AT3G62010	AT4G19390	AT3G30775	AT3G63210	AT3G46370	AT3G50070			AT2G05630	AT2G25470			AT1G61370	AT3G18035	AT1G59590	AT3G05200	AT1G52200	AT2G31970	AT1G30000	AT2G01860	AT4G27740		AT1G22370	AT1G53320
	AT3G18770	AT4G10000	AT3G62090	AT4G21510	AT3G42050	AT3G63240	AT3G46590	AT3G50270			AT2G05710	AT2G25737			AT1G61420	AT3G18080	AT1G59610	AT3G05230	AT1G52450	AT2G32730	AT1G30200	AT2G02110	AT1G51800		AT1G22400	AT1G53330
	AT3G19580	AT4G11150	AT3G62630	AT4G21880	AT3G42806	AT3G63290	AT3G46600	AT3G50760			AT2G05765	AT2G25900			AT1G61430	AT3G18350	AT1G59620	AT3G05530	AT1G52710	AT2G32800	AT1G30220	AT2G02180	AT5G54780		AT1G22500	AT1G53350
	AT3G19640	AT4G12080	AT3G62920	AT4G21930	AT3G43850	AT4G00440	AT3G46880	AT3G50850			AT2G06520	AT2G26030			AT1G61460	AT3G18560	AT1G59710	AT3G05710	AT1G52780	AT2G32810	AT1G30270	AT2G02220	AT5G48440		AT1G22510	AT1G53400
	AT3G19660	AT4G12470	AT3G63210	AT4G22310	AT3G44200	AT4G00750	AT3G47350	AT3G51040			AT2G06530	AT2G26260			AT1G61490	AT3G18930	AT1G59820	AT3G06210	AT1G52800	AT2G32900	AT1G30370	AT2G02360	AT3G48760		AT1G22570	AT1G53480
	AT3G19990	AT4G13250	AT3G63250	AT4G22360	AT3G45140	AT4G01020	AT3G47380	AT3G51110			AT2G07727	AT2G26310			AT1G61510	AT3G19190	AT1G59870	AT3G06380	AT1G53030	AT2G33080	AT1G30410	AT2G02370	AT1G65845		AT1G22620	AT1G53560
	AT3G20390	AT4G13830	AT3G63290	AT4G23680	AT3G45780	AT4G01026	AT3G47470	AT3G52030			AT2G07811	AT2G26710			AT1G61560	AT3G19270	AT1G60140	AT3G06420	AT1G53110	AT2G33150	AT1G30420	AT2G02710	AT5G58430		AT1G22650	AT1G53580
	AT3G21351	AT4G14880	AT3G63440	AT4G23730	AT3G45860	AT4G01850	AT3G48590	AT3G52060			AT2G14080	AT2G26990			AT1G61690	AT3G19290	AT1G60420	AT3G06500	AT1G53165	AT2G33210	AT1G30540	AT2G02960	AT3G26220		AT1G22810	AT1G53710
	AT3G22110	AT4G14905	AT4G00420	AT4G24020	AT3G45960	AT4G02120	AT3G48600	AT3G52860			AT2G14610	AT2G27030			AT1G61780	AT3G19553	AT1G60490	AT3G06850	AT1G53320	AT2G33390	AT1G30550	AT2G02970	AT2G46940		AT1G22840	AT1G53750
	AT3G22160	AT4G15140	AT4G01026	AT4G24275	AT3G46090	AT4G02390	AT3G49120	AT3G53340			AT2G14620	AT2G27050			AT1G61790	AT3G19580	AT1G60989	AT3G07010	AT1G53330	AT2G33630	AT1G30620	AT2G03220	AT1G03580		AT1G22860	AT1G53770
	AT3G22230	AT4G15210	AT4G01130	AT4G24390	AT3G46320	AT4G02500	AT3G49160	AT3G53570			AT2G14835	AT2G27285			AT1G62040	AT3G19615	AT1G61170	AT3G07390	AT1G53350	AT2G33990	AT1G30640	AT2G03510	AT1G62422		AT1G22870	AT1G53850
	AT3G22260	AT4G16060	AT4G02500	AT4G24450	AT3G46370	AT4G02540	AT3G49530	AT3G53650			AT2G15760	AT2G27460			AT1G62300	AT3G19930	AT1G61180	AT3G07480	AT1G53390	AT2G34470	AT1G30720	AT2G03530	AT1G80510		AT1G22890	AT1G54010
	AT3G22910	AT4G16444	AT4G02970	AT4G25000	AT3G46590	AT4G03115	AT3G49550	AT3G53960			AT2G16090	AT2G27510			AT1G62305	AT3G20050	AT1G61250	AT3G07568	AT1G53430	AT2G34690	AT1G30730	AT2G03680	AT4G26270		AT1G22920	AT1G54115
	AT3G22942	AT4G16710	AT4G03600	AT4G25650	AT3G46600	AT4G03140	AT3G49620	AT3G54750			AT2G17040	AT2G27830			AT1G62422	AT3G20060	AT1G61360	AT3G07680	AT1G53440	AT2G34940	AT1G30755	AT2G03760	AT1G13530		AT1G23052	AT1G54170
	AT3G23030	AT4G17640	AT4G04330	AT4G25660	AT3G46880	AT4G03510	AT3G50110	AT3G54826			AT2G17450	AT2G28710			AT1G62430	AT3G20280	AT1G61370	AT3G07790	AT1G53560	AT2G35020	AT1G30757	AT2G03870	AT1G18260		AT1G23060	AT1G54210
	AT3G23080	AT4G17660	AT4G04409	AT4G26200	AT3G46970	AT4G04409	AT3G50270	AT3G55240			AT2G17560	AT2G28760			AT1G63460	AT3G20440	AT1G61380	AT3G08610	AT1G53580	AT2G35320	AT1G30810	AT2G04070	AT5G27380		AT1G23090	AT1G54320
	AT3G23110	AT4G18360	AT4G04620	AT4G26640	AT3G47350	AT4G04970	AT3G50430	AT3G55440			AT2G17740	AT2G28960			AT1G63690	AT3G20670	AT1G61420	AT3G08650	AT1G53625	AT2G35590	AT1G30890	AT2G04430	AT1G61560		AT1G23120	AT1G54360
	AT3G23170	AT4G18440	AT4G04745	AT4G27410	AT3G47380	AT4G08330	AT3G50520	AT3G55480			AT2G17780	AT2G29410			AT1G63740	AT3G20770	AT1G61430	AT3G09020	AT1G53710	AT2G35680	AT1G30900	AT2G04490	AT1G63740		AT1G23130	AT1G54410
	AT3G23240	AT4G18990	AT4G04780	AT4G27710	AT3G47470	AT4G08350	AT3G51310	AT3G55740			AT2G17880	AT2G29490			AT1G63800	AT3G21805	AT1G61460	AT3G09030	AT1G53770	AT2G35690	AT1G31130	AT2G04690	AT2G33150		AT1G23230	AT1G54440
	AT3G23250	AT4G20460	AT4G05030	AT4G27760	AT3G47540	AT4G08540	AT3G51450	AT3G56470			AT2G18010	AT2G29670			AT1G63830	AT3G22060	AT1G61490	AT3G09740	AT1G53910	AT2G36060	AT1G31220	AT2G04852	AT5G67450		AT1G23260	AT1G54460
	AT3G24350	AT4G20960	AT4G08290	AT4G28260	AT3G47560	AT4G08690	AT3G51830	AT3G56580			AT2G18020	AT2G30105			AT1G64280	AT3G22190	AT1G61560	AT3G09840	AT1G54030	AT2G36080	AT1G31460	AT2G04860	AT3G26600		AT1G23390	AT1G54660
	AT3G24830	AT4G21930	AT4G08920	AT4G29230	AT3G47590	AT4G08900	AT3G51915	AT3G57100			AT2G18030	AT2G30110			AT1G64385	AT3G22600	AT1G61690	AT3G10250	AT1G54100	AT2G36310	AT1G31540	AT2G05240	AT3G54100		AT1G23440	AT1G54740
	AT3G25510	AT4G22310	AT4G09560	AT4G29310	AT3G47930	AT4G08920	AT3G52070	AT3G57580			AT2G18040	AT2G30580			AT1G64400	AT3G22961	AT1G61790	AT3G10260	AT1G54115	AT2G36420	AT1G31550	AT2G06025	AT1G69840		AT1G23490	AT1G54920
	AT3G25600	AT4G22360	AT4G09760	AT4G29700	AT3G48590	AT4G08950	AT3G52190	AT3G57750			AT2G18280	AT2G30710			AT1G64460	AT3G23690	AT1G62300	AT3G10550	AT1G54150	AT2G36680	AT1G31780	AT2G06095	AT3G45260		AT1G23510	AT1G54923
	AT3G25717	AT4G23730	AT4G09800	AT4G29890	AT3G48600	AT4G09000	AT3G52300	AT3G57760			AT2G18290	AT2G30740			AT1G64470	AT3G25020	AT1G62305	AT3G10860	AT1G54210	AT2G36900	AT1G32120	AT2G06490	AT1G67810		AT1G23730	AT1G54926
	AT3G25760	AT4G24060	AT4G10050	AT4G30510	AT3G48820	AT4G09320	AT3G52630	AT3G58170			AT2G18300	AT2G30920			AT1G64520	AT3G25150	AT1G62310	AT3G10920	AT1G54410	AT2G37130	AT1G32130	AT2G06740	AT1G28260		AT1G23830	AT1G55090
	AT3G25780	AT4G24450	AT4G10140	AT4G30790	AT3G49160	AT4G09560	AT3G53370	AT3G58380			AT2G18650	AT2G30990			AT1G64610	AT3G26165	AT1G62422	AT3G11270	AT1G54490	AT2G37160	AT1G32210	AT2G06790	AT3G04910		AT1G23840	AT1G55170
	AT3G26170	AT4G24990	AT4G10330	AT4G31398	AT3G49320	AT4G09760	AT3G53650	AT3G59080			AT2G18700	AT2G31090			AT1G64710	AT3G26180	AT1G62730	AT3G11480	AT1G54660	AT2G37320	AT1G32330	AT2G07180	AT5G46050		AT1G23850	AT1G55420
	AT3G26440	AT4G25200	AT4G10340	AT4G31410	AT3G49530	AT4G11230	AT3G54030	AT3G59300			AT2G18750	AT2G31130			AT1G65040	AT3G26200	AT1G63350	AT3G12290	AT1G55050	AT2G37678	AT1G32340	AT2G07240	AT1G09730		AT1G23870	AT1G55860
	AT3G26470	AT4G25660	AT4G10695	AT4G31970	AT3G49550	AT4G11360	AT3G54160	AT3G59940			AT2G18770	AT2G31510			AT1G65720	AT3G26220	AT1G63460	AT3G12360	AT1G55090	AT2G37690	AT1G32460	AT2G07360	AT5G23510		AT1G23900	AT1G56060
	AT3G26690	AT4G26130	AT4G10920	AT4G32130	AT3G49790	AT4G12570	AT3G54880	AT3G59950			AT2G19250	AT2G31751			AT1G65820	AT3G26720	AT1G63720	AT3G12490	AT1G55280	AT2G37840	AT1G32540	AT2G07750	AT5G44572		AT1G23960	AT1G56070
	AT3G26840	AT4G26288	AT4G10940	AT4G32480	AT3G50110	AT4G14230	AT3G55440	AT3G60200			AT2G19600	AT2G32020			AT1G65845	AT3G26740	AT1G63730	AT3G12710	AT1G55365	AT2G37920	AT1G32580	AT2G11290	AT5G64500		AT1G24050	AT1G56190
	AT3G27000	AT4G26555	AT4G11280	AT4G32960	AT3G50280	AT4G14340	AT3G55560	AT3G60340			AT2G19740	AT2G32080			AT1G65850	AT3G27280	AT1G63740	AT3G12760	AT1G55420	AT2G38000	AT1G32700	AT2G11500	AT3G12290		AT1G24140	AT1G56220
	AT3G27230	AT4G26640	AT4G11460	AT4G34660	AT3G50520	AT4G14500	AT3G56460	AT3G60410			AT2G19810	AT2G32150			AT1G65980	AT3G28180	AT1G63750	AT3G13062	AT1G55430	AT2G38790	AT1G32790	AT2G11670	AT5G59150		AT1G24145	AT1G56280
	AT3G27280	AT4G27040	AT4G12650	AT4G34840	AT3G50800	AT4G14520	AT3G56880	AT3G61350			AT2G20060	AT2G32400			AT1G66240	AT3G28865	AT1G63830	AT3G13200	AT1G55450	AT2G39050	AT1G32920	AT2G12260	AT1G04400		AT1G24150	AT1G56460
	AT3G27310	AT4G27410	AT4G12735	AT4G35440	AT3G51010	AT4G14570	AT3G56950	AT3G62010			AT2G20260	AT2G32487			AT1G66410	AT3G29035	AT1G63860	AT3G13310	AT1G55510	AT2G39100	AT1G32960	AT2G12490	AT5G20990		AT1G24190	AT1G56540
	AT3G27500	AT4G27480	AT4G13250	AT4G35880	AT3G51310	AT4G14880	AT3G57030	AT3G62070			AT2G20360	AT2G32530			AT1G66590	AT3G29080	AT1G63880	AT3G13430	AT1G55590	AT2G39230	AT1G33030	AT2G12550	AT4G11670		AT1G24400	AT1G56550
	AT3G27880	AT4G27710	AT4G13395	AT4G36032	AT3G51830	AT4G14905	AT3G57650	AT3G62080			AT2G20390	AT2G32580			AT1G66600	AT3G29240	AT1G64065	AT3G13550	AT1G55610	AT2G39280	AT1G33050	AT2G13100	AT5G63850		AT1G24440	AT1G57870
	AT3G27970	AT4G27760	AT4G14500	AT4G37690	AT3G52070	AT4G14930	AT3G57760	AT3G62220			AT2G20850	AT2G32660			AT1G66700	AT3G29320	AT1G64280	AT3G13610	AT1G55730	AT2G39400	AT1G33250	AT2G13170	AT3G47090		AT1G24450	AT1G57990
	AT3G27997	AT4G28350	AT4G14880	AT4G37990	AT3G52630	AT4G14990	AT3G57790	AT3G62770			AT2G20990	AT2G32910			AT1G66880	AT3G29650	AT1G64385	AT3G13860	AT1G55850	AT2G39920	AT1G33420	AT2G13250	AT1G13060		AT1G24460	AT1G58030
	AT3G28050	AT4G28910	AT4G14930	AT4G38230	AT3G53370	AT4G15140	AT3G57890	AT3G63210			AT2G21020	AT2G32970			AT1G66900	AT3G29736	AT1G64460	AT3G14050	AT1G55860	AT2G40000	AT1G33560	AT2G13560	AT3G19010		AT1G24530	AT1G58060
	AT3G28100	AT4G29230	AT4G14960	AT4G38390	AT3G53580	AT4G15210	AT3G58120	AT3G63290			AT2G21050	AT2G32980			AT1G67060	AT3G29739	AT1G64470	AT3G14120	AT1G56060	AT2G40110	AT1G33590	AT2G13790	AT4G38540		AT1G25220	AT1G58180
	AT3G28340	AT4G29310	AT4G15560	AT4G38495	AT3G53650	AT4G15520	AT3G58580	AT4G00200			AT2G21160	AT2G33050			AT1G67190	AT3G30396	AT1G64520	AT3G14290	AT1G56130	AT2G40410	AT1G33610	AT2G14080	AT5G46520		AT1G25230	AT1G58190
	AT3G28510	AT4G29700	AT4G16060	AT4G38825	AT3G53870	AT4G16060	AT3G59080	AT4G00440			AT2G21188	AT2G33390			AT1G67265	AT3G30410	AT1G64610	AT3G14310	AT1G56140	AT2G40520	AT1G33612	AT2G14120	AT1G04440		AT1G25275	AT1G58200
	AT3G28580	AT4G30080	AT4G16444	AT4G38900	AT3G54030	AT4G17080	AT3G59900	AT4G01020			AT2G21530	AT2G33610			AT1G67310	AT3G30610	AT1G64710	AT3G14430	AT1G56145	AT2G40810	AT1G33720	AT2G14255	AT2G41100		AT1G25280	AT1G58225
	AT3G28857	AT4G30510	AT4G16500	AT4G39925	AT3G54160	AT4G18440	AT3G59940	AT4G01026			AT2G22370	AT2G33620			AT1G67520	AT3G30620	AT1G64750	AT3G14470	AT1G56150	AT2G40840	AT1G33950	AT2G14620	AT4G24990		AT1G25390	AT1G58300
	AT3G28890	AT4G30790	AT4G16515	AT5G01430	AT3G54880	AT4G18465	AT3G59950	AT4G01400			AT2G22475	AT2G33710			AT1G67800	AT3G30837	AT1G64810	AT3G15070	AT1G56220	AT2G41250	AT1G33960	AT2G14720	AT3G12570		AT1G25400	AT1G58400
	AT3G28910	AT4G30935	AT4G16695	AT5G02220	AT3G54890	AT4G19865	AT3G60070	AT4G01850			AT2G22570	AT2G33835			AT1G67810	AT3G30838	AT1G65040	AT3G15355	AT1G56240	AT2G41430	AT1G33970	AT2G14740	AT4G17270		AT1G25500	AT1G59580
	AT3G29000	AT4G31398	AT4G16892	AT5G02260	AT3G55440	AT4G20960	AT3G60340	AT4G02390			AT2G22780	AT2G34010			AT1G67850	AT3G32010	AT1G65270	AT3G15500	AT1G56250	AT2G41470	AT1G34120	AT2G14878	AT3G20770		AT1G25520	AT1G59590
	AT3G29130	AT4G31410	AT4G17100	AT5G02580	AT3G55480	AT4G21510	AT3G60370	AT4G02500			AT2G22840	AT2G34580			AT1G67910	AT3G32110	AT1G65486	AT3G15580	AT1G56280	AT2G41530	AT1G34130	AT2G15042	AT4G19860		AT1G25540	AT1G59600
	AT3G29170	AT4G31650	AT4G18210	AT5G03030	AT3G55560	AT4G21930	AT3G60480	AT4G02540			AT2G22880	AT2G34810			AT1G67970	AT3G32240	AT1G65500	AT3G15610	AT1G56300	AT2G41710	AT1G34150	AT2G15230	AT3G48170		AT1G25560	AT1G59610
	AT3G29360	AT4G32440	AT4G18400	AT5G03230	AT3G56030	AT4G22310	AT3G61050	AT4G02640			AT2G23090	AT2G35110			AT1G68000	AT3G33067	AT1G65540	AT3G15730	AT1G56460	AT2G42160	AT1G34180	AT2G15240	AT3G22460		AT1G25580	AT1G59620
	AT3G33225	AT4G32480	AT4G18440	AT5G03350	AT3G56740	AT4G23330	AT3G61060	AT4G02730			AT2G23093	AT2G35240			AT1G68100	AT3G33072	AT1G65720	AT3G16470	AT1G56470	AT2G42400	AT1G34190	AT2G15860	AT5G05090		AT1G25682	AT1G59900
	AT3G43250	AT4G32960	AT4G18975	AT5G03360	AT3G56880	AT4G23680	AT3G61960	AT4G03115			AT2G23770	AT2G35630			AT1G68190	AT3G33151	AT1G65790	AT3G16740	AT1G56550	AT2G42670	AT1G34200	AT2G15890	AT5G54310		AT1G26120	AT1G59990
	AT3G44620	AT4G32980	AT4G19170	AT5G03390	AT3G57030	AT4G23730	AT3G62090	AT4G04409			AT2G23820	AT2G35635			AT1G68300	AT3G33166	AT1G65800	AT3G17420	AT1G56700	AT2G42790	AT1G34220	AT2G15900	AT1G69890		AT1G26130	AT1G60140
	AT3G44860	AT4G33940	AT4G19200	AT5G04190	AT3G57260	AT4G24060	AT3G62220	AT4G04970			AT2G23890	AT2G35738			AT1G68650	AT3G33225	AT1G65820	AT3G17465	AT1G57540	AT2G43210	AT1G34260	AT2G16050	AT1G15130		AT1G26200	AT1G60220
	AT3G44880	AT4G34660	AT4G19865	AT5G04230	AT3G57760	AT4G24390	AT3G62450	AT4G08330			AT2G23940	AT2G36060			AT1G68710	AT3G42431	AT1G65845	AT3G17850	AT1G57630	AT2G43540	AT1G34300	AT2G16310	AT2G44140		AT1G26380	AT1G60420
	AT3G44970	AT4G35140	AT4G19890	AT5G04490	AT3G57870	AT4G24800	AT3G62630	AT4G08350			AT2G24165	AT2G36080			AT1G68840	AT3G42650	AT1G65850	AT3G18080	AT1G57650	AT2G43590	AT1G34320	AT2G16420	AT3G14460		AT1G26410	AT1G60490
	AT3G45060	AT4G35440	AT4G19900	AT5G05080	AT3G58120	AT4G25660	AT3G62920	AT4G08540			AT2G24300	AT2G36305			AT1G69270	AT3G42719	AT1G65970	AT3G18350	AT1G57790	AT2G43620	AT1G34380	AT2G16600	AT1G15670		AT1G26420	AT1G60940
	AT3G45140	AT4G36032	AT4G20030	AT5G05440	AT3G58640	AT4G26160	AT3G63210	AT4G08920			AT2G24550	AT2G36320			AT1G69520	AT3G42720	AT1G65980	AT3G18760	AT1G57870	AT2G43820	AT1G34420	AT2G16680	AT2G21240		AT1G26440	AT1G61100
	AT3G45860	AT4G36290	AT4G20140	AT5G05850	AT3G58900	AT4G26288	AT3G63250	AT4G08950			AT2G24755	AT2G36810			AT1G69720	AT3G43128	AT1G66240	AT3G18860	AT1G57990	AT2G43850	AT1G34750	AT2G16690	AT1G78895		AT1G26550	AT1G61140
	AT3G46090	AT4G36800	AT4G20320	AT5G07000	AT3G59080	AT4G26582	AT3G63290	AT4G09000			AT2G25000	AT2G36910			AT1G69780	AT3G43250	AT1G66410	AT3G18930	AT1G58030	AT2G44060	AT1G35210	AT2G16700	AT3G17940		AT1G26580	AT1G61170
	AT3G46280	AT4G37440	AT4G20380	AT5G07460	AT3G59540	AT4G26640	AT4G00420	AT4G09560			AT2G25180	AT2G37035			AT1G69840	AT3G43520	AT1G66590	AT3G18940	AT1G58060	AT2G44140	AT1G35230	AT2G16710	AT2G02390		AT1G26620	AT1G61180
	AT3G46320	AT4G37690	AT4G21170	AT5G07680	AT3G59810	AT4G27060	AT4G01130	AT4G09760			AT2G25280	AT2G37120			AT1G69850	AT3G43523	AT1G66680	AT3G19190	AT1G58180	AT2G44370	AT1G35580	AT2G16900	AT1G53330		AT1G26640	AT1G61250
	AT3G46540	AT4G37880	AT4G21200	AT5G07810	AT3G59840	AT4G27410	AT4G01200	AT4G11150			AT2G25440	AT2G37460			AT1G69890	AT3G43670	AT1G66700	AT3G19270	AT1G58190	AT2G44380	AT1G35710	AT2G17120	AT2G17975		AT1G26670	AT1G61350
	AT3G46690	AT4G37990	AT4G21830	AT5G07890	AT3G59940	AT4G27710	AT4G01400	AT4G11360			AT2G25450	AT2G37550			AT1G69910	AT3G43723	AT1G66880	AT3G19290	AT1G58220	AT2G44480	AT1G36050	AT2G17200	AT4G35310		AT1G26690	AT1G61420
	AT3G46970	AT4G38390	AT4G21870	AT5G08060	AT3G60370	AT4G27760	AT4G02500	AT4G11960			AT2G25737	AT2G38010			AT1G70100	AT3G43828	AT1G66900	AT3G19553	AT1G58225	AT2G44760	AT1G36060	AT2G17520	AT2G25735		AT1G26740	AT1G61430
	AT3G47350	AT4G38825	AT4G21880	AT5G08170	AT3G60740	AT4G28240	AT4G02610	AT4G12250			AT2G25900	AT2G38170			AT1G70160	AT3G43833	AT1G66910	AT3G19580	AT1G58230	AT2G45030	AT1G36070	AT2G17550	AT3G26740		AT1G26800	AT1G61460
	AT3G47620	AT4G38932	AT4G23530	AT5G08520	AT3G60966	AT4G28260	AT4G03190	AT4G12470			AT2G26010	AT2G38180			AT1G70290	AT3G44042	AT1G66920	AT3G19615	AT1G58410	AT2G45170	AT1G36380	AT2G17730	AT5G57035		AT1G26830	AT1G61480
	AT3G48630	AT4G38940	AT4G23600	AT5G08580	AT3G61060	AT4G28300	AT4G03410	AT4G12650			AT2G26020	AT2G38340			AT1G70420	AT3G44070	AT1G66960	AT3G20050	AT1G58420	AT2G45200	AT1G36600	AT2G17790	AT3G44326		AT1G26930	AT1G61510
	AT3G49120	AT4G39140	AT4G24020	AT5G08590	AT3G61180	AT4G29310	AT4G04330	AT4G14340			AT2G26030	AT2G38630			AT1G70518	AT3G44200	AT1G66970	AT3G20060	AT1G59580	AT2G45240	AT1G36975	AT2G17920	AT4G26070		AT1G26940	AT1G61690
	AT3G49530	AT4G39660	AT4G24210	AT5G09410	AT3G61190	AT4G29480	AT4G04340	AT4G14905			AT2G26260	AT2G38710			AT1G70520	AT3G45253	AT1G67060	AT3G20420	AT1G59590	AT2G45510	AT1G37110	AT2G17975	AT5G01950		AT1G27000	AT1G61770
	AT3G49620	AT4G39925	AT4G24370	AT5G10440	AT3G61470	AT4G29530	AT4G04370	AT4G14930			AT2G26530	AT2G38740			AT1G70530	AT3G45270	AT1G67190	AT3G20440	AT1G59610	AT2G45590	AT1G42130	AT2G18170	AT2G38470		AT1G27020	AT1G61780
	AT3G49725	AT5G01430	AT4G24570	AT5G12020	AT3G61570	AT4G30010	AT4G04409	AT4G14990			AT2G26710	AT2G38790			AT1G70690	AT3G45300	AT1G67310	AT3G20630	AT1G59650	AT2G45660	AT1G42990	AT2G18280	AT5G15080		AT1G27090	AT1G61790
	AT3G49940	AT5G02220	AT4G24800	AT5G12230	AT3G62010	AT4G30080	AT4G04745	AT4G15210			AT2G27050	AT2G38820			AT1G70740	AT3G45520	AT1G67520	AT3G20670	AT1G59820	AT2G45790	AT1G43000	AT2G18290	AT5G42460		AT1G27170	AT1G61850
	AT3G50280	AT5G02260	AT4G24820	AT5G13220	AT3G62090	AT4G30510	AT4G04780	AT4G15520			AT2G27310	AT2G38840			AT1G70820	AT3G45525	AT1G67550	AT3G21520	AT1G59870	AT2G45980	AT1G43130	AT2G18330	AT3G07800		AT1G27180	AT1G62260
	AT3G50550	AT5G02580	AT4G25870	AT5G13610	AT3G62450	AT4G30790	AT4G04955	AT4G16060			AT2G27330	AT2G38970			AT1G71190	AT3G45775	AT1G67800	AT3G22190	AT1G60420	AT2G46180	AT1G43890	AT2G18350	AT1G21240		AT1G27290	AT1G62300
	AT3G50770	AT5G03030	AT4G26288	AT5G13960	AT3G62530	AT4G30935	AT4G04970	AT4G16920			AT2G27460	AT2G39000			AT1G71390	AT3G46487	AT1G67810	AT3G22400	AT1G60490	AT2G46220	AT1G43910	AT2G18660	AT1G64710		AT1G27310	AT1G62422
	AT3G50800	AT5G03200	AT4G26555	AT5G14360	AT3G62630	AT4G31130	AT4G09560	AT4G17080			AT2G27660	AT2G39110			AT1G71520	AT3G46590	AT1G67850	AT3G22600	AT1G60830	AT2G46260	AT1G44070	AT2G18670	AT1G28330		AT1G27330	AT1G62580
	AT3G50930	AT5G03230	AT4G27280	AT5G14430	AT3G63210	AT4G31398	AT4G09760	AT4G17640			AT2G27720	AT2G39360			AT1G71697	AT3G46600	AT1G67920	AT3G22630	AT1G60870	AT2G46550	AT1G44130	AT2G18700	AT1G43130		AT1G27450	AT1G62810
	AT3G51450	AT5G03420	AT4G27690	AT5G14540	AT3G63250	AT4G31410	AT4G09800	AT4G18440			AT2G27770	AT2G39630			AT1G71800	AT3G47160	AT1G67970	AT3G22910	AT1G60940	AT2G46640	AT1G44770	AT2G18876	AT5G27420		AT1G27530	AT1G63180
	AT3G51600	AT5G04480	AT4G27730	AT5G15940	AT3G63290	AT4G31430	AT4G10140	AT4G19865			AT2G27830	AT2G39700			AT1G71865	AT3G47610	AT1G67980	AT3G22961	AT1G61150	AT2G46900	AT1G45035	AT2G19250	AT1G21120		AT1G27630	AT1G63270
	AT3G51915	AT5G04490	AT4G27960	AT5G15980	AT4G00026	AT4G32280	AT4G10330	AT4G20960			AT2G28160	AT2G39725			AT1G71970	AT3G47800	AT1G68000	AT3G23690	AT1G61180	AT2G47680	AT1G45145	AT2G19740	AT5G57580		AT1G27650	AT1G63350
	AT3G52190	AT5G04760	AT4G28240	AT5G16150	AT4G00420	AT4G32440	AT4G10695	AT4G21510			AT2G28370	AT2G39750			AT1G72010	AT3G48000	AT1G68100	AT3G25040	AT1G61250	AT2G47690	AT1G45150	AT2G19800	AT1G24440		AT1G27750	AT1G63740
	AT3G52420	AT5G05080	AT4G28630	AT5G16260	AT4G01130	AT4G32480	AT4G11280	AT4G21880			AT2G28400	AT2G39830			AT1G72060	AT3G48360	AT1G68300	AT3G25150	AT1G61260	AT3G01080	AT1G45976	AT2G19810	AT1G18890		AT1G27770	AT1G63770
	AT3G52450	AT5G05440	AT4G28880	AT5G16480	AT4G01200	AT4G32960	AT4G11360	AT4G22310			AT2G28500	AT2G40180			AT1G72160	AT3G48390	AT1G68690	AT3G25910	AT1G61360	AT3G01175	AT1G47056	AT2G19950	AT5G14480		AT1G27980	AT1G63800
	AT3G52560	AT5G05610	AT4G29160	AT5G16550	AT4G01320	AT4G32980	AT4G12480	AT4G23330			AT2G28755	AT2G40190			AT1G72280	AT3G48500	AT1G68765	AT3G26165	AT1G61370	AT3G01770	AT1G47310	AT2G20050	AT5G16880		AT1G28070	AT1G63830
	AT3G52630	AT5G05850	AT4G29380	AT5G16570	AT4G01897	AT4G33210	AT4G12650	AT4G23680			AT2G29110	AT2G40340			AT1G72330	AT3G48530	AT1G69030	AT3G26180	AT1G61420	AT3G02340	AT1G47360	AT2G20390	AT1G69850		AT1G28110	AT1G64280
	AT3G52710	AT5G07680	AT4G30280	AT5G16690	AT4G01900	AT4G33940	AT4G12735	AT4G23730			AT2G29120	AT2G40390			AT1G72680	AT3G48890	AT1G69270	AT3G26740	AT1G61430	AT3G02550	AT1G47420	AT2G20530	AT5G01750		AT1G28190	AT1G64370
	AT3G53370	AT5G07810	AT4G30780	AT5G17390	AT4G01920	AT4G34840	AT4G12900	AT4G24020			AT2G29470	AT2G40435			AT1G72710	AT3G49310	AT1G69360	AT3G27530	AT1G61460	AT3G02610	AT1G47480	AT2G20670	AT3G43670		AT1G28200	AT1G64385
	AT3G54030	AT5G07890	AT4G31480	AT5G17890	AT4G02330	AT4G35160	AT4G13250	AT4G24060			AT2G29670	AT2G40610			AT1G72900	AT3G49590	AT1G69520	AT3G28007	AT1G61480	AT3G02630	AT1G47550	AT2G20930	AT3G57460		AT1G28230	AT1G64400
	AT3G54160	AT5G08060	AT4G32460	AT5G18140	AT4G03190	AT4G35440	AT4G13395	AT4G24160			AT2G29680	AT2G40730			AT1G73030	AT3G49780	AT1G69550	AT3G29240	AT1G61490	AT3G03180	AT1G47640	AT2G20960	AT5G59070		AT1G28240	AT1G64405
	AT3G54270	AT5G08190	AT4G32530	AT5G18290	AT4G03320	AT4G35480	AT4G14070	AT4G24210			AT2G29690	AT2G40740			AT1G73200	AT3G49790	AT1G69720	AT3G29320	AT1G61560	AT3G03490	AT1G47650	AT2G21240	AT5G55100		AT1G28250	AT1G64460
	AT3G55470	AT5G08520	AT4G32605	AT5G18630	AT4G03600	AT4G35850	AT4G14500	AT4G24390			AT2G30010	AT2G40810			AT1G73250	AT3G49800	AT1G69780	AT3G29370	AT1G61620	AT3G03870	AT1G47860	AT2G21500	AT3G14310		AT1G28260	AT1G64470
	AT3G55560	AT5G08590	AT4G32990	AT5G18650	AT4G04180	AT4G35880	AT4G14880	AT4G24800			AT2G30050	AT2G40830			AT1G73380	AT3G50260	AT1G69840	AT3G29575	AT1G61690	AT3G04670	AT1G47880	AT2G21520	AT5G45500		AT1G28280	AT1G64520
	AT3G55980	AT5G09620	AT4G33670	AT5G18661	AT4G04340	AT4G36032	AT4G14930	AT4G24990			AT2G30060	AT2G40840			AT1G73500	AT3G50470	AT1G69850	AT3G30393	AT1G61810	AT3G04910	AT1G47890	AT2G21850	AT5G65910		AT1G28320	AT1G64610
	AT3G56460	AT5G09920	AT4G33780	AT5G19000	AT4G04409	AT4G37770	AT4G14960	AT4G26200			AT2G30110	AT2G40860			AT1G73655	AT3G50500	AT1G69890	AT3G31945	AT1G61850	AT3G04930	AT1G48090	AT2G22480	AT1G69270		AT1G28330	AT1G64880
	AT3G56740	AT5G10400	AT4G34200	AT5G19010	AT4G04780	AT4G38230	AT4G15475	AT4G26640			AT2G30190	AT2G40880			AT1G73805	AT3G50700	AT1G69900	AT3G33189	AT1G62040	AT3G05120	AT1G48160	AT2G22570	AT2G37520		AT1G28380	AT1G64890
	AT3G56880	AT5G10440	AT4G34215	AT5G19120	AT4G04970	AT4G38390	AT4G15760	AT4G27060			AT2G30410	AT2G41150			AT1G73810	AT3G50750	AT1G70160	AT3G42050	AT1G62200	AT3G05200	AT1G48170	AT2G22860	AT3G57050		AT1G28480	AT1G65270
	AT3G56950	AT5G10745	AT4G34380	AT5G19130	AT4G05030	AT4G38495	AT4G16500	AT4G27410			AT2G30570	AT2G41160			AT1G74170	AT3G51010	AT1G70420	AT3G42790	AT1G62260	AT3G06210	AT1G48210	AT2G23110	AT5G50200		AT1G28490	AT1G65290
	AT3G57260	AT5G10900	AT4G34760	AT5G20650	AT4G08290	AT4G38600	AT4G16515	AT4G27480			AT2G30600	AT2G41450			AT1G74280	AT3G51110	AT1G70518	AT3G43250	AT1G62300	AT3G06380	AT1G48280	AT2G23310	AT5G18470		AT1G28520	AT1G65370
	AT3G57560	AT5G10980	AT4G35440	AT5G21070	AT4G08920	AT4G38825	AT4G17100	AT4G27710			AT2G30720	AT2G41830			AT1G74360	AT3G51340	AT1G70520	AT3G43520	AT1G62305	AT3G06440	AT1G48320	AT2G23450	AT1G16090		AT1G28540	AT1G65410
	AT3G57650	AT5G11840	AT4G35880	AT5G21170	AT4G09000	AT4G38900	AT4G17430	AT4G27760			AT2G30920	AT2G42280			AT1G74440	AT3G51840	AT1G70530	AT3G43670	AT1G62310	AT3G06500	AT1G48370	AT2G23810	AT3G49800		AT1G28580	AT1G65484
	AT3G57760	AT5G12230	AT4G36430	AT5G22400	AT4G09560	AT4G38940	AT4G17490	AT4G29230			AT2G31200	AT2G42640			AT1G74590	AT3G52060	AT1G70581	AT3G44326	AT1G62422	AT3G06580	AT1G48430	AT2G23890	AT4G22980		AT1G29060	AT1G65800
	AT3G57890	AT5G13200	AT4G36720	AT5G22920	AT4G09760	AT4G39140	AT4G17510	AT4G29310			AT2G31300	AT2G42670			AT1G74680	AT3G52240	AT1G70690	AT3G45300	AT1G62430	AT3G06620	AT1G48490	AT2G24160	AT3G48640		AT1G29240	AT1G65845
	AT3G58580	AT5G13220	AT4G37190	AT5G23240	AT4G09800	AT5G01430	AT4G18210	AT4G29530			AT2G31580	AT2G42760			AT1G74710	AT3G52300	AT1G70740	AT3G46590	AT1G62730	AT3G06850	AT1G48605	AT2G24240	AT5G16800		AT1G29280	AT1G65850
	AT3G59080	AT5G13610	AT4G37300	AT5G23550	AT4G10000	AT5G01600	AT4G18230	AT4G29700			AT2G32010	AT2G42780			AT1G74910	AT3G52850	AT1G70980	AT3G47160	AT1G62810	AT3G07010	AT1G49000	AT2G24390	AT1G22510		AT1G29290	AT1G65980
	AT3G59540	AT5G13960	AT4G37540	AT5G23610	AT4G10050	AT5G02220	AT4G18340	AT4G30080			AT2G32020	AT2G43050			AT1G75130	AT3G52930	AT1G71040	AT3G47340	AT1G62840	AT3G07060	AT1G49032	AT2G24550	AT1G10200		AT1G29310	AT1G66040
	AT3G59810	AT5G14360	AT4G37550	AT5G23670	AT4G10140	AT5G02580	AT4G18890	AT4G30935			AT2G32100	AT2G43060			AT1G75140	AT3G53810	AT1G71190	AT3G47540	AT1G63245	AT3G07780	AT1G49040	AT2G24765	AT3G61790		AT1G29330	AT1G66230
	AT3G59880	AT5G14430	AT4G38040	AT5G24160	AT4G10330	AT5G03030	AT4G18975	AT4G31130			AT2G32170	AT2G43120			AT1G75380	AT3G54670	AT1G71220	AT3G47610	AT1G63350	AT3G07870	AT1G49050	AT2G25070	AT4G40042		AT1G29357	AT1G66410
	AT3G59900	AT5G15940	AT4G38420	AT5G24270	AT4G10340	AT5G03230	AT4G19160	AT4G31398			AT2G32190	AT2G43180			AT1G75440	AT3G54860	AT1G71390	AT3G47800	AT1G63370	AT3G08650	AT1G49130	AT2G25510	AT1G56220		AT1G29395	AT1G66580
	AT3G59940	AT5G16260	AT4G38825	AT5G24400	AT4G10500	AT5G03240	AT4G19170	AT4G31410			AT2G32200	AT2G43330			AT1G75490	AT3G54880	AT1G71410	AT3G48170	AT1G63460	AT3G08890	AT1G49240	AT2G25520	AT3G45310		AT1G29400	AT1G66680
	AT3G61050	AT5G16480	AT4G38900	AT5G24520	AT4G10695	AT5G03420	AT4G19810	AT4G31430			AT2G32487	AT2G43400			AT1G76040	AT3G55840	AT1G71520	AT3G48330	AT1G63720	AT3G09020	AT1G49300	AT2G25737	AT5G45250		AT1G29550	AT1G66780
	AT3G61190	AT5G16550	AT4G39200	AT5G24800	AT4G10840	AT5G04190	AT4G19865	AT4G31950			AT2G32550	AT2G43520			AT1G76150	AT3G56190	AT1G71697	AT3G48380	AT1G63740	AT3G09030	AT1G49480	AT2G25850	AT2G04860		AT1G29690	AT1G66910
	AT3G61200	AT5G16660	AT5G01530	AT5G24890	AT4G10920	AT5G04230	AT4G19890	AT4G32280			AT2G32560	AT2G43580			AT1G76410	AT3G56720	AT1G71800	AT3G48523	AT1G63770	AT3G09040	AT1G49710	AT2G26190	AT1G25560		AT1G29715	AT1G66960
	AT3G61390	AT5G16690	AT5G01600	AT5G25790	AT4G11280	AT5G04290	AT4G20030	AT4G32360			AT2G32580	AT2G43620			AT1G76510	AT3G57520	AT1G72060	AT3G48530	AT1G63800	AT3G09410	AT1G49720	AT2G26200	AT1G20620		AT1G29800	AT1G66970
	AT3G61960	AT5G17890	AT5G02490	AT5G25920	AT4G11360	AT5G04490	AT4G20140	AT4G32960			AT2G32650	AT2G43680			AT1G76590	AT3G58750	AT1G72280	AT3G48600	AT1G63830	AT3G09480	AT1G49820	AT2G26210	AT3G49490		AT1G29850	AT1G66980
	AT3G62010	AT5G18080	AT5G02570	AT5G27710	AT4G11655	AT5G04590	AT4G20320	AT4G33650			AT2G32850	AT2G43760			AT1G76680	AT3G59920	AT1G72330	AT3G48890	AT1G63880	AT3G09900	AT1G50030	AT2G26400	AT4G20330		AT1G29860	AT1G67000
	AT3G62220	AT5G18140	AT5G02650	AT5G27860	AT4G12230	AT5G05080	AT4G20380	AT4G33940			AT2G32970	AT2G44130			AT1G76700	AT3G60130	AT1G72680	AT3G49310	AT1G64280	AT3G10020	AT1G50360	AT2G26510	AT1G10920		AT1G29960	AT1G67105
	AT3G62580	AT5G18290	AT5G03050	AT5G35777	AT4G12650	AT5G05310	AT4G20860	AT4G34310			AT2G33020	AT2G44210			AT1G76920	AT3G60190	AT1G72710	AT3G49320	AT1G64370	AT3G10120	AT1G50410	AT2G26560	AT3G59660		AT1G29970	AT1G67120
	AT3G63290	AT5G18590	AT5G03230	AT5G37590	AT4G13250	AT5G05660	AT4G21170	AT4G34840			AT2G33370	AT2G44370			AT1G76940	AT3G60240	AT1G72855	AT3G49590	AT1G64385	AT3G10250	AT1G50430	AT2G26570	AT5G67340		AT1G30000	AT1G67140
	AT3G63440	AT5G19000	AT5G03240	AT5G38480	AT4G13430	AT5G06370	AT4G21180	AT4G35140			AT2G33490	AT2G44380			AT1G76970	AT3G60820	AT1G72900	AT3G49780	AT1G64400	AT3G10630	AT1G50440	AT2G26600	AT5G25180		AT1G30200	AT1G67250
	AT4G00420	AT5G19160	AT5G03360	AT5G38780	AT4G14230	AT5G06870	AT4G21200	AT4G35480			AT2G33580	AT2G44383			AT1G77000	AT3G61050	AT1G73030	AT3G49790	AT1G64405	AT3G10850	AT1G50480	AT2G26890	AT1G20890		AT1G30220	AT1G67310
	AT4G00700	AT5G19300	AT5G03850	AT5G38850	AT4G14320	AT5G07810	AT4G21830	AT4G35850			AT2G34010	AT2G44740			AT1G77210	AT3G61060	AT1G73200	AT3G49800	AT1G64610	AT3G10860	AT1G50500	AT2G27150	AT4G02370		AT1G30270	AT1G67560
	AT4G01026	AT5G19670	AT5G04480	AT5G38860	AT4G14880	AT5G07870	AT4G21870	AT4G36032			AT2G34150	AT2G44790			AT1G77220	AT3G61070	AT1G73250	AT3G50470	AT1G64710	AT3G10985	AT1G50520	AT2G27200	AT5G01800		AT1G30370	AT1G67800
	AT4G01200	AT5G19920	AT5G04590	AT5G38880	AT4G14930	AT5G07890	AT4G21880	AT4G36050			AT2G34420	AT2G44850			AT1G77350	AT3G62010	AT1G73380	AT3G50500	AT1G65250	AT3G12290	AT1G50570	AT2G27310	AT5G60800		AT1G30410	AT1G67850
	AT4G01897	AT5G20170	AT5G04895	AT5G39360	AT4G15010	AT5G07940	AT4G22150	AT4G36290			AT2G34430	AT2G45170			AT1G77370	AT3G62360	AT1G73500	AT3G50700	AT1G65390	AT3G12490	AT1G50735	AT2G27600	AT3G15580		AT1G30420	AT1G67860
	AT4G02080	AT5G20900	AT5G05110	AT5G39660	AT4G15140	AT5G08060	AT4G22300	AT4G36800			AT2G34480	AT2G45260			AT1G77420	AT3G62550	AT1G73655	AT3G50920	AT1G65484	AT3G12950	AT1G50740	AT2G27900	AT1G02660		AT1G30540	AT1G67870
	AT4G02200	AT5G22400	AT5G05140	AT5G39720	AT4G15520	AT5G08170	AT4G23530	AT4G37440			AT2G34620	AT2G45810			AT1G77500	AT3G62770	AT1G73805	AT3G51010	AT1G65540	AT3G13062	AT1G50940	AT2G27920	AT5G12480		AT1G30550	AT1G67920
	AT4G02330	AT5G22794	AT5G05435	AT5G40460	AT4G16500	AT5G08190	AT4G23550	AT4G37610			AT2G34650	AT2G46030			AT1G77510	AT3G62950	AT1G73810	AT3G51840	AT1G65580	AT3G13090	AT1G51270	AT2G28110	AT2G39550		AT1G30620	AT1G67970
	AT4G02410	AT5G22850	AT5G05590	AT5G40550	AT4G16890	AT5G08520	AT4G24060	AT4G37880			AT2G35070	AT2G46490			AT1G77660	AT4G00975	AT1G74170	AT3G52240	AT1G65690	AT3G13430	AT1G51402	AT2G28120	AT2G28890		AT1G30640	AT1G68000
	AT4G02500	AT5G23000	AT5G05610	AT5G41280	AT4G17010	AT5G08590	AT4G24210	AT4G38230			AT2G35240	AT2G46505			AT1G77710	AT4G01000	AT1G74280	AT3G52300	AT1G65720	AT3G13450	AT1G51590	AT2G28210	AT2G34470		AT1G30700	AT1G68020
	AT4G02930	AT5G23550	AT5G05620	AT5G41761	AT4G18210	AT5G08670	AT4G24275	AT4G38390			AT2G35320	AT2G46540			AT1G77810	AT4G01090	AT1G74300	AT3G52850	AT1G65790	AT3G13550	AT1G51620	AT2G28630	AT1G77420		AT1G30720	AT1G68110
	AT4G03410	AT5G24270	AT5G05660	AT5G41880	AT4G18230	AT5G09300	AT4G24370	AT4G38495			AT2G35635	AT2G46700			AT1G77960	AT4G01100	AT1G74350	AT3G53020	AT1G65845	AT3G13860	AT1G51645	AT2G28830	AT3G29034		AT1G30730	AT1G68140
	AT4G03600	AT5G24290	AT5G05760	AT5G41910	AT4G18340	AT5G09620	AT4G24570	AT4G38600			AT2G35780	AT2G47600			AT1G78270	AT4G01210	AT1G74360	AT3G53150	AT1G65850	AT3G14120	AT1G51660	AT2G28840	AT5G59260		AT1G30755	AT1G68600
	AT4G04020	AT5G24670	AT5G05790	AT5G42400	AT4G18400	AT5G10400	AT4G24800	AT4G38825			AT2G35930	AT2G47700			AT1G78410	AT4G01250	AT1G74440	AT3G53580	AT1G65980	AT3G14290	AT1G51790	AT2G28890	AT1G77370		AT1G30757	AT1G68710
	AT4G04490	AT5G24800	AT5G05950	AT5G42850	AT4G18440	AT5G10440	AT4G25440	AT4G38900			AT2G36080	AT2G47730			AT1G78420	AT4G01850	AT1G74680	AT3G53630	AT1G66160	AT3G14310	AT1G51800	AT2G28940	AT2G31990		AT1G30810	AT1G68840
	AT4G04745	AT5G24890	AT5G06690	AT5G42860	AT4G19170	AT5G10900	AT4G26130	AT4G38940			AT2G36310	AT2G47960			AT1G78460	AT4G02370	AT1G74710	AT3G53650	AT1G66240	AT3G14410	AT1G51850	AT2G29020	AT5G42830		AT1G30820	AT1G69060
	AT4G04780	AT5G25130	AT5G06865	AT5G43440	AT4G19180	AT5G10910	AT4G26288	AT4G39170			AT2G36370	AT2G47970			AT1G78550	AT4G02450	AT1G74790	AT3G54560	AT1G66590	AT3G14590	AT1G51860	AT2G29080	AT4G13640		AT1G30825	AT1G69220
	AT4G04970	AT5G25190	AT5G06930	AT5G43980	AT4G19660	AT5G11840	AT4G26555	AT4G39910			AT2G36380	AT2G48030			AT1G78600	AT4G02480	AT1G74910	AT3G54850	AT1G66680	AT3G14680	AT1G51890	AT2G29100	AT1G78890		AT1G30890	AT1G69270
	AT4G05030	AT5G25280	AT5G07590	AT5G44569	AT4G19865	AT5G12230	AT4G27070	AT4G39925			AT2G36530	AT3G01090			AT1G78830	AT4G02580	AT1G75130	AT3G54860	AT1G66700	AT3G15000	AT1G51920	AT2G29340	AT4G13030		AT1G30900	AT1G69350
	AT4G08230	AT5G25451	AT5G07810	AT5G44570	AT4G19890	AT5G13220	AT4G27280	AT4G40080			AT2G36770	AT3G01150			AT1G78850	AT4G02930	AT1G75140	AT3G54880	AT1G66780	AT3G15070	AT1G51940	AT2G29400	AT4G20410		AT1G31130	AT1G69360
	AT4G08290	AT5G27320	AT5G08320	AT5G44572	AT4G20030	AT5G13590	AT4G27390	AT5G01430			AT2G36780	AT3G01350			AT1G78870	AT4G02980	AT1G75380	AT3G55410	AT1G66880	AT3G15130	AT1G52200	AT2G30250	AT5G37780		AT1G31220	AT1G69530
	AT4G08920	AT5G27710	AT5G08330	AT5G44910	AT4G20380	AT5G13610	AT4G27440	AT5G01490			AT2G36792	AT3G01360			AT1G78890	AT4G03080	AT1G75440	AT3G55480	AT1G66920	AT3G15160	AT1G52360	AT2G30530	AT5G52760		AT1G31290	AT1G69740
	AT4G09000	AT5G27860	AT5G09300	AT5G45100	AT4G21170	AT5G13960	AT4G27450	AT5G02220			AT2G36800	AT3G01450			AT1G78895	AT4G03110	AT1G75800	AT3G55840	AT1G67000	AT3G15290	AT1G52420	AT2G30590	AT3G15355		AT1G31460	AT1G69780
	AT4G09560	AT5G34853	AT5G09410	AT5G45440	AT4G22300	AT5G14540	AT4G27760	AT5G02260			AT2G36900	AT3G01460			AT1G78920	AT4G03510	AT1G76040	AT3G56440	AT1G67060	AT3G15355	AT1G52600	AT2G30770	AT3G59090		AT1G31540	AT1G69850
	AT4G09760	AT5G35460	AT5G10030	AT5G45810	AT4G22540	AT5G15940	AT4G27860	AT5G03030			AT2G37130	AT3G01910			AT1G79010	AT4G03550	AT1G76150	AT3G57340	AT1G67265	AT3G15358	AT1G52710	AT2G31020	AT5G25930		AT1G31550	AT1G69890
	AT4G09800	AT5G35790	AT5G10290	AT5G45840	AT4G23300	AT5G16150	AT4G27960	AT5G03230			AT2G37160	AT3G02170			AT1G79210	AT4G03560	AT1G76410	AT3G57420	AT1G67310	AT3G15590	AT1G52780	AT2G31060	AT3G47550		AT1G31570	AT1G70150
	AT4G10050	AT5G35910	AT5G10570	AT5G45990	AT4G23550	AT5G16180	AT4G28070	AT5G03390			AT2G37460	AT3G02370			AT1G79380	AT4G04910	AT1G76580	AT3G57480	AT1G67490	AT3G15610	AT1G53030	AT2G31350	AT2G18670		AT1G31580	AT1G70160
	AT4G10140	AT5G36210	AT5G11280	AT5G46210	AT4G23600	AT5G16280	AT4G28630	AT5G03420			AT2G37470	AT3G02700			AT1G79670	AT4G05060	AT1G76590	AT3G57520	AT1G67510	AT3G15630	AT1G53100	AT2G31400	AT5G63410		AT1G31780	AT1G70290
	AT4G10330	AT5G37930	AT5G11290	AT5G47080	AT4G23650	AT5G16570	AT4G28720	AT5G04090			AT2G37620	AT3G02780			AT1G79680	AT4G05070	AT1G76600	AT3G58750	AT1G67520	AT3G15730	AT1G53110	AT2G31800	AT4G15420		AT1G32120	AT1G70300
	AT4G10860	AT5G38480	AT5G11580	AT5G48020	AT4G24060	AT5G16690	AT4G28880	AT5G04480			AT2G37660	AT3G02800			AT1G79700	AT4G05150	AT1G76680	AT3G59380	AT1G67550	AT3G15840	AT1G53160	AT2G31870	AT3G46510		AT1G32130	AT1G70320
	AT4G10920	AT5G38780	AT5G11890	AT5G48370	AT4G24210	AT5G18110	AT4G29740	AT5G04490			AT2G37680	AT3G03140			AT1G79710	AT4G06622	AT1G76700	AT3G59820	AT1G67800	AT3G15970	AT1G53165	AT2G31880	AT1G03290		AT1G32150	AT1G70420
	AT4G10940	AT5G39080	AT5G12050	AT5G48720	AT4G24370	AT5G18230	AT4G29950	AT5G05080			AT2G37790	AT3G03180			AT1G80170	AT4G06624	AT1G76860	AT3G59920	AT1G67810	AT3G16030	AT1G53280	AT2G31970	AT1G60490		AT1G32170	AT1G70490
	AT4G11280	AT5G39360	AT5G12140	AT5G49510	AT4G24490	AT5G18290	AT4G30010	AT5G05850			AT2G38170	AT3G03340			AT1G80180	AT4G06698	AT1G76920	AT3G59930	AT1G67850	AT3G16700	AT1G53320	AT2G32520	AT1G70520		AT1G32172	AT1G70518
	AT4G11655	AT5G39720	AT5G12880	AT5G50410	AT4G24570	AT5G18590	AT4G30280	AT5G05930			AT2G38260	AT3G03773			AT1G80190	AT4G08040	AT1G76940	AT3G60190	AT1G67860	AT3G16857	AT1G53330	AT2G32700	AT5G49830		AT1G32210	AT1G70520
	AT4G12230	AT5G40460	AT5G12950	AT5G50790	AT4G24800	AT5G18630	AT4G30690	AT5G06780			AT2G38530	AT3G03790			AT1G80210	AT4G08460	AT1G76960	AT3G60260	AT1G67920	AT3G17020	AT1G53350	AT2G32730	AT5G42010		AT1G32260	AT1G70530
	AT4G12300	AT5G41120	AT5G13430	AT5G50950	AT4G24820	AT5G18650	AT4G30780	AT5G06870			AT2G38580	AT3G03830			AT1G80310	AT4G08680	AT1G76970	AT3G60740	AT1G67970	AT3G17770	AT1G53390	AT2G32800	AT4G16000		AT1G32330	AT1G70690
	AT4G12470	AT5G41150	AT5G14180	AT5G51190	AT4G24970	AT5G18661	AT4G31050	AT5G07000			AT2G38710	AT3G03850			AT1G80420	AT4G08920	AT1G77210	AT3G60820	AT1G67980	AT3G17940	AT1G53440	AT2G32810	AT5G04750		AT1G32340	AT1G70740
	AT4G12480	AT5G41330	AT5G14200	AT5G51300	AT4G25360	AT5G18800	AT4G32140	AT5G07250			AT2G38790	AT3G03890			AT1G80460	AT4G09320	AT1G77220	AT3G61070	AT1G68000	AT3G18080	AT1G53710	AT2G32885	AT4G04720		AT1G32460	AT1G70820
	AT4G12735	AT5G41670	AT5G14210	AT5G51370	AT4G26288	AT5G19010	AT4G32280	AT5G07322			AT2G38820	AT3G03990			AT1G80510	AT4G10080	AT1G77350	AT3G62010	AT1G68100	AT3G18350	AT1G53770	AT2G32900	AT4G39890		AT1G32540	AT1G70980
	AT4G13250	AT5G41761	AT5G14430	AT5G51840	AT4G26555	AT5G19080	AT4G32460	AT5G07680			AT2G38870	AT3G04300			AT1G80570	AT4G10320	AT1G77370	AT3G62290	AT1G68110	AT3G18580	AT1G53830	AT2G33080	AT4G01010		AT1G32580	AT1G71030
	AT4G13360	AT5G41880	AT5G14470	AT5G53340	AT4G27090	AT5G19120	AT4G32605	AT5G07810			AT2G39380	AT3G04600			AT1G80650	AT4G10730	AT1G77420	AT3G62370	AT1G68300	AT3G18860	AT1G53910	AT2G33120	AT1G11310		AT1G32700	AT1G71040
	AT4G13395	AT5G42400	AT5G14590	AT5G54540	AT4G27280	AT5G19130	AT4G32650	AT5G07890			AT2G39410	AT3G04605			AT1G80920	AT4G10790	AT1G77500	AT3G62550	AT1G68690	AT3G19190	AT1G54030	AT2G33150	AT1G73810		AT1G32790	AT1G71080
	AT4G13820	AT5G42650	AT5G15160	AT5G54855	AT4G27440	AT5G19300	AT4G33670	AT5G08060			AT2G39460	AT3G04740			AT1G80950	AT4G11280	AT1G77660	AT3G62560	AT1G68820	AT3G19270	AT1G54115	AT2G33170	AT5G46150		AT1G32920	AT1G71180
	AT4G14070	AT5G42660	AT5G15320	AT5G55450	AT4G27450	AT5G19310	AT4G33780	AT5G08190			AT2G39518	AT3G05040			AT1G80960	AT4G11300	AT1G77810	AT4G01210	AT1G69270	AT3G19290	AT1G54150	AT2G33175	AT1G02610		AT1G32960	AT1G71220
	AT4G14370	AT5G42860	AT5G15650	AT5G56230	AT4G27690	AT5G19670	AT4G34030	AT5G08520			AT2G39650	AT3G05120			AT2G01029	AT4G11360	AT1G77890	AT4G01400	AT1G69450	AT3G19460	AT1G54170	AT2G33210	AT4G36970		AT1G33030	AT1G71270
	AT4G14450	AT5G43280	AT5G16030	AT5G56550	AT4G27730	AT5G20620	AT4G34150	AT5G08590			AT2G39705	AT3G05170			AT2G01060	AT4G12590	AT1G78190	AT4G01850	AT1G69720	AT3G19490	AT1G54210	AT2G33390	AT2G02760		AT1G33050	AT1G71390
	AT4G14560	AT5G43440	AT5G16050	AT5G56840	AT4G27960	AT5G20650	AT4G34200	AT5G09300			AT2G39750	AT3G05280			AT2G01180	AT4G13395	AT1G78280	AT4G02570	AT1G69740	AT3G19520	AT1G54320	AT2G33630	AT5G41160		AT1G33055	AT1G71440
	AT4G14600	AT5G43980	AT5G16480	AT5G57660	AT4G28070	AT5G20830	AT4G34215	AT5G09630			AT2G39900	AT3G05500			AT2G01340	AT4G13640	AT1G78310	AT4G02930	AT1G69810	AT3G19553	AT1G54360	AT2G33730	AT1G25220		AT1G33140	AT1G71520
	AT4G14880	AT5G44569	AT5G16570	AT5G58740	AT4G28400	AT5G21170	AT4G34760	AT5G09740			AT2G39910	AT3G05510			AT2G01450	AT4G13850	AT1G78410	AT4G02980	AT1G69840	AT3G20060	AT1G54490	AT2G34940	AT1G22890		AT1G33250	AT1G71697
	AT4G14960	AT5G44580	AT5G17330	AT5G58790	AT4G28703	AT5G21940	AT4G34770	AT5G09920			AT2G39920	AT3G05545			AT2G01490	AT4G14270	AT1G78420	AT4G03030	AT1G69850	AT3G20440	AT1G54575	AT2G35020	AT3G54150		AT1G33420	AT1G71860
	AT4G15010	AT5G45100	AT5G17610	AT5G59070	AT4G28720	AT5G22310	AT4G34790	AT5G10400			AT2G39980	AT3G05680			AT2G01540	AT4G14430	AT1G78460	AT4G03080	AT1G69890	AT3G20770	AT1G54990	AT2G35050	AT5G39450		AT1G33475	AT1G71890
	AT4G15475	AT5G45160	AT5G18010	AT5G59160	AT4G28880	AT5G22400	AT4G35880	AT5G10440			AT2G40000	AT3G05760			AT2G01650	AT4G14500	AT1G78550	AT4G03560	AT1G69900	AT3G20960	AT1G55365	AT2G35070	AT1G23830		AT1G33560	AT1G72020
	AT4G16150	AT5G45360	AT5G18050	AT5G59430	AT4G29480	AT5G22850	AT4G36410	AT5G10745			AT2G40190	AT3G06070			AT2G01860	AT4G14930	AT1G78620	AT4G03920	AT1G70140	AT3G22190	AT1G55450	AT2G35110	AT4G04220		AT1G33590	AT1G72060
	AT4G16260	AT5G45440	AT5G18080	AT5G60190	AT4G29740	AT5G22920	AT4G36430	AT5G10910			AT2G40205	AT3G06080			AT2G01930	AT4G15070	AT1G78830	AT4G04105	AT1G70150	AT3G22460	AT1G55590	AT2G35320	AT2G15900		AT1G33600	AT1G72160
	AT4G16515	AT5G45650	AT5G18800	AT5G60200	AT4G29950	AT5G23320	AT4G36630	AT5G10980			AT2G40270	AT3G06370			AT2G02010	AT4G15420	AT1G78850	AT4G04790	AT1G70160	AT3G22640	AT1G55730	AT2G35680	AT2G29990		AT1G33610	AT1G72330
	AT4G16860	AT5G45840	AT5G18930	AT5G60370	AT4G30410	AT5G23610	AT4G37190	AT5G11800			AT2G40640	AT3G06400			AT2G02220	AT4G15760	AT1G78890	AT4G04950	AT1G70300	AT3G23330	AT1G55850	AT2G35980	AT3G21640		AT1G33612	AT1G72540
	AT4G17100	AT5G45990	AT5G19070	AT5G60680	AT4G30845	AT5G24270	AT4G37290	AT5G11840			AT2G40860	AT3G06420			AT2G02360	AT4G16000	AT1G78895	AT4G05150	AT1G70420	AT3G23480	AT1G56060	AT2G36080	AT4G38630		AT1G33720	AT1G72700
	AT4G18210	AT5G46210	AT5G19120	AT5G61440	AT4G31060	AT5G24520	AT4G37540	AT5G12230			AT2G40970	AT3G06470			AT2G02370	AT4G16130	AT1G78900	AT4G06558	AT1G70518	AT3G23690	AT1G56120	AT2G36240	AT3G48650		AT1G33770	AT1G72710
	AT4G18440	AT5G47240	AT5G19440	AT5G61550	AT4G31480	AT5G24670	AT4G37770	AT5G13220			AT2G41110	AT3G06780			AT2G02390	AT4G16280	AT1G78920	AT4G06588	AT1G70520	AT3G23900	AT1G56130	AT2G36310	AT4G03030		AT1G33790	AT1G72830
	AT4G18890	AT5G47370	AT5G20830	AT5G62270	AT4G32060	AT5G24890	AT4G38040	AT5G13390			AT2G41380	AT3G07100			AT2G02400	AT4G16892	AT1G79010	AT4G06642	AT1G70530	AT3G24315	AT1G56140	AT2G36680	AT3G53410		AT1G33840	AT1G72840
	AT4G18930	AT5G48720	AT5G20885	AT5G62760	AT4G32280	AT5G25190	AT4G38420	AT5G14360			AT2G41410	AT3G07280			AT2G02410	AT4G17080	AT1G79110	AT4G06704	AT1G70590	AT3G25020	AT1G56145	AT2G36900	AT5G06570		AT1G33950	AT1G72860
	AT4G18975	AT5G49510	AT5G20900	AT5G62950	AT4G32460	AT5G25920	AT4G38470	AT5G14430			AT2G41510	AT3G07350			AT2G02450	AT4G17230	AT1G79210	AT4G07810	AT1G70690	AT3G25150	AT1G56150	AT2G37160	AT3G58600		AT1G33960	AT1G73200
	AT4G19170	AT5G49945	AT5G21070	AT5G63020	AT4G32605	AT5G26700	AT4G38850	AT5G14540			AT2G41705	AT3G07480			AT2G02710	AT4G17245	AT1G79340	AT4G07850	AT1G70820	AT3G25910	AT1G56165	AT2G37460	AT1G34300		AT1G33970	AT1G73250
	AT4G19200	AT5G50790	AT5G21940	AT5G63180	AT4G32990	AT5G27320	AT4G39200	AT5G15940			AT2G42210	AT3G07640			AT2G02760	AT4G17900	AT1G79360	AT4G07874	AT1G70980	AT3G26165	AT1G56190	AT2G37520	AT3G19540		AT1G33980	AT1G73480
	AT4G19810	AT5G50950	AT5G22390	AT5G63280	AT4G33100	AT5G27470	AT4G39220	AT5G15980			AT2G42230	AT3G07790			AT2G02810	AT4G18050	AT1G79380	AT4G07965	AT1G71040	AT3G26180	AT1G56220	AT2G37678	AT1G32920		AT1G33990	AT1G73500
	AT4G19865	AT5G50970	AT5G22580	AT5G63470	AT4G34150	AT5G27650	AT4G39660	AT5G16150			AT2G42310	AT3G07800			AT2G02930	AT4G18170	AT1G79670	AT4G08520	AT1G71080	AT3G26190	AT1G56240	AT2G37690	AT3G16720		AT1G34044	AT1G73680
	AT4G20030	AT5G51160	AT5G22790	AT5G63480	AT4G34200	AT5G27710	AT5G01600	AT5G16180			AT2G42320	AT3G07930			AT2G02960	AT4G18340	AT1G79680	AT4G09320	AT1G71140	AT3G26220	AT1G56340	AT2G37840	AT3G12490		AT1G34120	AT1G73805
	AT4G20320	AT5G51300	AT5G22920	AT5G63830	AT4G34215	AT5G35777	AT5G02010	AT5G16210			AT2G42360	AT3G07940			AT2G03120	AT4G19160	AT1G79700	AT4G09425	AT1G71190	AT3G26280	AT1G56423	AT2G38000	AT4G19185		AT1G34130	AT1G73810
	AT4G20380	AT5G51370	AT5G23010	AT5G64160	AT4G34380	AT5G37590	AT5G02570	AT5G16320			AT2G42480	AT3G08590			AT2G03510	AT4G19420	AT1G80180	AT4G09595	AT1G71220	AT3G26612	AT1G56440	AT2G38410	AT1G03730		AT1G34150	AT1G73920
	AT4G20860	AT5G52545	AT5G23020	AT5G64910	AT4G34450	AT5G37930	AT5G02650	AT5G16480			AT2G42490	AT3G08860			AT2G03530	AT4G19660	AT1G80190	AT4G10080	AT1G71390	AT3G26740	AT1G56450	AT2G38790	AT1G18160		AT1G34180	AT1G74088
	AT4G21580	AT5G53340	AT5G23130	AT5G65207	AT4G34760	AT5G38470	AT5G03230	AT5G16550			AT2G42590	AT3G08890			AT2G03540	AT4G19860	AT1G80210	AT4G10320	AT1G71400	AT3G27280	AT1G56460	AT2G38820	AT2G15040		AT1G34190	AT1G74170
	AT4G21870	AT5G53350	AT5G23200	AT5G65660	AT4G34770	AT5G38850	AT5G04190	AT5G16570			AT2G42600	AT3G09320			AT2G03760	AT4G21105	AT1G80420	AT4G10980	AT1G71410	AT3G27870	AT1G56540	AT2G39230	AT5G02020		AT1G34200	AT1G74260
	AT4G21880	AT5G54430	AT5G23240	AT5G65760	AT4G34790	AT5G39250	AT5G04360	AT5G16690			AT2G42610	AT3G09390			AT2G03870	AT4G21120	AT1G80450	AT4G10990	AT1G71520	AT3G28660	AT1G56550	AT2G39280	AT2G33630		AT1G34220	AT1G74350
	AT4G22300	AT5G54540	AT5G23535	AT5G66380	AT4G35440	AT5G39360	AT5G04510	AT5G17250			AT2G42640	AT3G09900			AT2G04070	AT4G21510	AT1G80460	AT4G11150	AT1G71697	AT3G28910	AT1G56590	AT2G39350	AT4G11890		AT1G34260	AT1G74440
	AT4G22756	AT5G54730	AT5G24490	AT5G66480	AT4G35850	AT5G39660	AT5G04740	AT5G17890			AT2G42680	AT3G10020			AT2G04430	AT4G21810	AT1G80510	AT4G11470	AT1G71800	AT3G28945	AT1G57560	AT2G39400	AT4G21810		AT1G34300	AT1G74590
	AT4G23140	AT5G54855	AT5G24620	AT5G66490	AT4G36290	AT5G39720	AT5G05435	AT5G18230			AT2G42700	AT3G10030			AT2G04495	AT4G21960	AT1G80570	AT4G11860	AT1G71910	AT3G29035	AT1G57620	AT2G39480	AT1G69720		AT1G34315	AT1G74680
	AT4G23215	AT5G55600	AT5G25190	AT5G67520	AT4G37290	AT5G40460	AT5G05590	AT5G18290			AT2G42960	AT3G10130			AT2G04515	AT4G22540	AT1G80650	AT4G11900	AT1G71980	AT3G29320	AT1G57630	AT2G39660	AT5G65960		AT1G34320	AT1G75040
	AT4G23320	AT5G55850	AT5G26940	ATCG00570	AT4G37300	AT5G41100	AT5G05610	AT5G18630			AT2G42980	AT3G10260			AT2G04550	AT4G23470	AT1G80820	AT4G12460	AT1G72060	AT3G29350	AT1G57990	AT2G39920	AT1G63460		AT1G34370	AT1G75140
	AT4G23550	AT5G55896	AT5G27520		AT4G37530	AT5G41110	AT5G05620	AT5G18800			AT2G43070	AT3G10310			AT2G04690	AT4G23530	AT1G80830	AT4G12590	AT1G72160	AT3G29575	AT1G58060	AT2G40000	AT1G77660		AT1G34380	AT1G75200
	AT4G23600	AT5G55940	AT5G27850		AT4G38420	AT5G41150	AT5G05760	AT5G18840			AT2G43150	AT3G10390			AT2G04860	AT4G23700	AT1G80920	AT4G12650	AT1G72280	AT3G30120	AT1G58110	AT2G40110	AT5G18780		AT1G34420	AT1G75220
	AT4G24020	AT5G56520	AT5G35730		AT4G38850	AT5G41880	AT5G05790	AT5G19000			AT2G43400	AT3G10440			AT2G06025	AT4G23810	AT1G80960	AT4G13030	AT1G72330	AT3G30380	AT1G58180	AT2G40140	AT5G06750		AT1G34750	AT1G75230
	AT4G24210	AT5G56840	AT5G35790		AT4G38900	AT5G41910	AT5G05850	AT5G19010			AT2G43570	AT3G10480			AT2G07180	AT4G24020	AT2G01029	AT4G13250	AT1G72416	AT3G42790	AT1G58190	AT2G40410	AT5G66675		AT1G34760	AT1G75380
	AT4G24370	AT5G57150	AT5G36970		AT4G39220	AT5G42860	AT5G05930	AT5G19080			AT2G43620	AT3G10490			AT2G07360	AT4G24040	AT2G01060	AT4G13430	AT1G72630	AT3G43250	AT1G58220	AT2G40610	AT3G15518		AT1G35210	AT1G75420
	AT4G25440	AT5G57330	AT5G37420		AT4G39370	AT5G43280	AT5G06420	AT5G19160			AT2G43640	AT3G10550			AT2G07715	AT4G24230	AT2G01180	AT4G13640	AT1G72680	AT3G43520	AT1G58225	AT2G40650	AT3G02770		AT1G35230	AT1G75490
	AT4G25900	AT5G57500	AT5G38110		AT5G01530	AT5G43400	AT5G06865	AT5G19200			AT2G43760	AT3G10660			AT2G11520	AT4G24350	AT2G01340	AT4G13820	AT1G72710	AT3G43670	AT1G58300	AT2G40840	AT3G14050		AT1G35580	AT1G75830
	AT4G26582	AT5G57660	AT5G39080		AT5G01600	AT5G43980	AT5G06930	AT5G19310			AT2G43820	AT3G10730			AT2G12490	AT4G24390	AT2G01450	AT4G14420	AT1G72830	AT3G44205	AT1G58360	AT2G41250	AT5G35370		AT1G35612	AT1G76150
	AT4G26940	AT5G58590	AT5G39320		AT5G01620	AT5G44260	AT5G07010	AT5G19530			AT2G43870	AT3G11100			AT2G12550	AT4G24690	AT2G01470	AT4G14500	AT1G72852	AT3G44326	AT1G58420	AT2G41430	AT2G04070		AT1G35620	AT1G76200
	AT4G27070	AT5G58640	AT5G39800		AT5G02010	AT5G44569	AT5G07590	AT5G19670			AT2G44060	AT3G11280			AT2G13170	AT4G24800	AT2G01490	AT4G14880	AT1G72855	AT3G45300	AT1G59520	AT2G41530	AT5G18170		AT1G35670	AT1G76320
	AT4G27220	AT5G58740	AT5G40650		AT5G02570	AT5G44910	AT5G07790	AT5G20650			AT2G44210	AT3G11590			AT2G13560	AT4G25170	AT2G01540	AT4G14930	AT1G72860	AT3G45310	AT1G59580	AT2G41710	AT5G35200		AT1G35710	AT1G76560
	AT4G27280	AT5G58790	AT5G40870		AT5G02650	AT5G45100	AT5G07810	AT5G21940			AT2G44350	AT3G11650			AT2G13650	AT4G25835	AT2G01650	AT4G15010	AT1G72950	AT3G45710	AT1G59590	AT2G41730	AT3G51920		AT1G35720	AT1G76580
	AT4G27690	AT5G59160	AT5G40920		AT5G02760	AT5G45650	AT5G08320	AT5G22310			AT2G44380	AT3G11780			AT2G13790	AT4G25880	AT2G01670	AT4G15420	AT1G73030	AT3G45730	AT1G59600	AT2G42160	AT3G13050		AT1G36050	AT1G76590
	AT4G27730	AT5G59430	AT5G41590		AT5G03230	AT5G45810	AT5G08330	AT5G22400			AT2G44383	AT3G11890			AT2G13800	AT4G25940	AT2G01720	AT4G15760	AT1G73200	AT3G46590	AT1G59610	AT2G42400	AT4G28652		AT1G36060	AT1G76600
	AT4G27860	AT5G59840	AT5G41670		AT5G03345	AT5G45840	AT5G08410	AT5G22850			AT2G44500	AT3G11930			AT2G13810	AT4G26160	AT2G02010	AT4G16000	AT1G73250	AT3G46960	AT1G59620	AT2G43160	AT3G20250		AT1G36070	AT1G76700
	AT4G27960	AT5G60190	AT5G41910		AT5G03360	AT5G46210	AT5G08565	AT5G23090			AT2G44520	AT3G11960			AT2G14080	AT4G26400	AT2G02060	AT4G16130	AT1G73380	AT3G47010	AT1G59650	AT2G43780	AT5G49650		AT1G36380	AT1G76710
	AT4G28070	AT5G60200	AT5G42320		AT5G03470	AT5G47080	AT5G09300	AT5G23550			AT2G44610	AT3G12200			AT2G14120	AT4G27260	AT2G02180	AT4G16420	AT1G73655	AT3G47050	AT1G59710	AT2G43850	AT1G71190		AT1G36600	AT1G76900
	AT4G28390	AT5G60370	AT5G42840		AT5G04190	AT5G47370	AT5G09630	AT5G23670			AT2G44740	AT3G12300			AT2G14720	AT4G27450	AT2G02220	AT4G16520	AT1G73680	AT3G47160	AT1G59820	AT2G43970	AT5G42560		AT1G36940	AT1G76920
	AT4G28400	AT5G60680	AT5G42860		AT5G04360	AT5G48570	AT5G10030	AT5G24160			AT2G45240	AT3G12380			AT2G14878	AT4G27460	AT2G02360	AT4G16830	AT1G73805	AT3G47210	AT1G59870	AT2G44130	AT3G48530		AT1G36975	AT1G76940
	AT4G28980	AT5G60730	AT5G43600		AT5G04480	AT5G48720	AT5G10400	AT5G24270			AT2G45600	AT3G12600			AT2G15040	AT4G27470	AT2G02370	AT4G17900	AT1G73810	AT3G47220	AT1G59900	AT2G44140	AT5G20000		AT1G37110	AT1G77000
	AT4G29160	AT5G60870	AT5G43710		AT5G04510	AT5G48780	AT5G10570	AT5G24520			AT2G45810	AT3G12650			AT2G15042	AT4G27870	AT2G02390	AT4G18060	AT1G73980	AT3G47530	AT1G60140	AT2G44180	AT1G32700		AT1G42130	AT1G77130
	AT4G29380	AT5G61440	AT5G44005		AT5G04590	AT5G48810	AT5G10710	AT5G24670			AT2G46150	AT3G12680			AT2G15230	AT4G28260	AT2G02710	AT4G18170	AT1G74170	AT3G47570	AT1G60420	AT2G44370	AT4G04960		AT1G42990	AT1G77210
	AT4G29560	AT5G61490	AT5G44210		AT5G04895	AT5G50410	AT5G10745	AT5G24890			AT2G46170	AT3G13030			AT2G15240	AT4G28270	AT2G02760	AT4G18440	AT1G74280	AT3G47610	AT1G60440	AT2G44380	AT5G65575		AT1G43000	AT1G77220
	AT4G30010	AT5G61640	AT5G44720		AT5G05010	AT5G50790	AT5G11140	AT5G25190			AT2G46180	AT3G13290			AT2G15390	AT4G28300	AT2G02810	AT4G18880	AT1G74300	AT3G47800	AT1G60490	AT2G44410	AT5G19860		AT1G43130	AT1G77350
	AT4G30280	AT5G62950	AT5G45340		AT5G05230	AT5G50850	AT5G11280	AT5G25280			AT2G46400	AT3G13410			AT2G15480	AT4G28470	AT2G02930	AT4G19160	AT1G74360	AT3G47840	AT1G60730	AT2G44530	AT1G16180		AT1G43620	AT1G77370
	AT4G30360	AT5G63280	AT5G45650		AT5G05620	AT5G50950	AT5G11290	AT5G27320			AT2G46540	AT3G13550			AT2G15570	AT4G28703	AT2G02960	AT4G19420	AT1G74440	AT3G48170	AT1G60780	AT2G44910	AT2G26560		AT1G43890	AT1G77420
	AT4G30480	AT5G63470	AT5G47040		AT5G05660	AT5G50970	AT5G11520	AT5G27470			AT2G46550	AT3G13560			AT2G15830	AT4G28860	AT2G03120	AT4G19660	AT1G74590	AT3G48380	AT1G61140	AT2G45010	AT3G10250		AT1G43910	AT1G77440
	AT4G30780	AT5G63480	AT5G47240		AT5G05780	AT5G51370	AT5G11580	AT5G27650			AT2G46600	AT3G13772			AT2G15880	AT4G28880	AT2G03410	AT4G19860	AT1G74650	AT3G48390	AT1G61150	AT2G45030	AT5G54710		AT1G44070	AT1G77460
	AT4G30845	AT5G63830	AT5G47370		AT5G05790	AT5G52545	AT5G11600	AT5G27710			AT2G46650	AT3G13850			AT2G15890	AT4G28970	AT2G03510	AT4G19865	AT1G74680	AT3G48523	AT1G61170	AT2G45200	AT4G17245		AT1G44130	AT1G77480
	AT4G30850	AT5G63870	AT5G47900		AT5G05950	AT5G53150	AT5G11890	AT5G35777			AT2G47190	AT3G14067			AT2G15900	AT4G29190	AT2G03530	AT4G19870	AT1G74790	AT3G48530	AT1G61180	AT2G45510	AT2G17130		AT1G44170	AT1G77500
	AT4G31510	AT5G64160	AT5G47940		AT5G06420	AT5G53340	AT5G12140	AT5G35910			AT2G47210	AT3G14750			AT2G15960	AT4G29735	AT2G03540	AT4G21105	AT1G75130	AT3G49310	AT1G61250	AT2G45590	AT3G11080		AT1G44770	AT1G77660
	AT4G32460	AT5G64260	AT5G47960		AT5G06865	AT5G54540	AT5G12880	AT5G38470			AT2G47390	AT3G15020			AT2G16310	AT4G29750	AT2G03760	AT4G21150	AT1G75140	AT3G49320	AT1G61255	AT2G45620	AT5G57700		AT1G45035	AT1G77765
	AT4G32605	AT5G64470	AT5G48370		AT5G06930	AT5G54730	AT5G13420	AT5G38480			AT2G47600	AT3G15290			AT2G16595	AT4G29950	AT2G04070	AT4G21360	AT1G75220	AT3G49710	AT1G61260	AT2G45630	AT5G60950		AT1G45145	AT1G77960
	AT4G32650	AT5G64600	AT5G48430		AT5G07590	AT5G54855	AT5G13430	AT5G38780			AT2G47730	AT3G15358			AT2G16600	AT4G30260	AT2G04340	AT4G21450	AT1G75250	AT3G49725	AT1G61360	AT2G45660	AT5G16150		AT1G45150	AT1G78270
	AT4G32930	AT5G64910	AT5G49525		AT5G07790	AT5G55896	AT5G13550	AT5G38860			AT3G01090	AT3G15450			AT2G16710	AT4G30640	AT2G04450	AT4G21730	AT1G75380	AT3G49780	AT1G61370	AT2G45910	AT1G80920		AT1G45976	AT1G78380
	AT4G32990	AT5G65207	AT5G49555		AT5G07810	AT5G55940	AT5G14180	AT5G38880			AT3G01170	AT3G15540			AT2G16870	AT4G31180	AT2G04490	AT4G21810	AT1G75580	AT3G49790	AT1G61380	AT2G45980	AT5G18750		AT1G46554	AT1G78420
	AT4G33540	AT5G65260	AT5G49710		AT5G07820	AT5G56230	AT5G14200	AT5G39250			AT3G01175	AT3G15610			AT2G16930	AT4G31340	AT2G04495	AT4G21960	AT1G75630	AT3G49800	AT1G61420	AT2G46180	AT4G36550		AT1G47056	AT1G78460
	AT4G33780	AT5G65495	AT5G49945		AT5G07860	AT5G56520	AT5G14210	AT5G39360			AT3G01360	AT3G15640			AT2G17110	AT4G31420	AT2G04515	AT4G22220	AT1G75800	AT3G50010	AT1G61430	AT2G46220	AT5G05730		AT1G47128	AT1G78550
	AT4G34200	ATCG00570	AT5G50850		AT5G08320	AT5G56840	AT5G14260	AT5G39660			AT3G01390	AT3G15660			AT2G17120	AT4G32060	AT2G04550	AT4G22330	AT1G75830	AT3G50040	AT1G61460	AT2G46260	AT3G21080		AT1G47310	AT1G78830
	AT4G34215		AT5G50870		AT5G08330	AT5G57340	AT5G14470	AT5G39720			AT3G01690	AT3G16630			AT2G17130	AT4G32280	AT2G04690	AT4G22540	AT1G76150	AT3G50260	AT1G61480	AT2G46550	AT5G11670		AT1G47330	AT1G78890
	AT4G34380		AT5G51190		AT5G09900	AT5G57500	AT5G14590	AT5G39940			AT3G01830	AT3G17250			AT2G17200	AT4G32470	AT2G04860	AT4G22670	AT1G76580	AT3G50430	AT1G61490	AT2G46620	AT4G34180		AT1G47360	AT1G78895
	AT4G35260		AT5G52390		AT5G10030	AT5G57660	AT5G14730	AT5G40550			AT3G01930	AT3G17590			AT2G17220	AT4G32530	AT2G04900	AT4G24040	AT1G76590	AT3G50470	AT1G61550	AT2G46900	AT5G35690		AT1G47420	AT1G78900
	AT4G35440		AT5G52545		AT5G10400	AT5G57780	AT5G15160	AT5G41150			AT3G02080	AT3G17820			AT2G17420	AT4G32850	AT2G05240	AT4G24490	AT1G76700	AT3G50500	AT1G61560	AT2G47320	AT1G08900		AT1G47480	AT1G78920
	AT4G35480		AT5G52890		AT5G10570	AT5G58030	AT5G15320	AT5G41280			AT3G02090	AT3G17850			AT2G17450	AT4G32950	AT2G05380	AT4G24520	AT1G76850	AT3G50700	AT1G61620	AT2G47390	AT5G08660		AT1G47550	AT1G78955
	AT4G35630		AT5G53120		AT5G10760	AT5G58670	AT5G15650	AT5G41330			AT3G02150	AT3G17900			AT2G17520	AT4G33210	AT2G05520	AT4G24690	AT1G76920	AT3G50740	AT1G61670	AT2G47760	AT1G07020		AT1G47640	AT1G79000
	AT4G36195		AT5G54190		AT5G11280	AT5G58740	AT5G15880	AT5G41590			AT3G02190	AT3G18035			AT2G17570	AT4G33510	AT2G05765	AT4G24800	AT1G76940	AT3G50750	AT1G61690	AT2G48030	AT3G54620		AT1G47650	AT1G79010
	AT4G36290		AT5G54750		AT5G11290	AT5G58790	AT5G16030	AT5G41880			AT3G02360	AT3G18140			AT2G17705	AT4G34030	AT2G05840	AT4G25880	AT1G76960	AT3G51340	AT1G61770	AT3G01080	AT5G26340		AT1G47860	AT1G79190
	AT4G36430		AT5G54800		AT5G11520	AT5G59140	AT5G16050	AT5G41910			AT3G02460	AT3G18215			AT2G17720	AT4G34100	AT2G06002	AT4G25940	AT1G76970	AT3G51830	AT1G61780	AT3G01290	AT4G29040		AT1G47880	AT1G79210
	AT4G36648		AT5G54855		AT5G11580	AT5G59430	AT5G16120	AT5G42470			AT3G02550	AT3G18410			AT2G17760	AT4G34110	AT2G06530	AT4G26160	AT1G76980	AT3G51840	AT1G61790	AT3G01310	AT5G44070		AT1G47890	AT1G79380
	AT4G37300		AT5G55190		AT5G12050	AT5G59700	AT5G16400	AT5G42650			AT3G02630	AT3G18770			AT2G17790	AT4G34138	AT2G07180	AT4G26180	AT1G77000	AT3G52240	AT1G61800	AT3G01770	AT1G08720		AT1G47960	AT1G79390
	AT4G37530		AT5G55500		AT5G12140	AT5G60370	AT5G16480	AT5G42660			AT3G02650	AT3G18990			AT2G17880	AT4G34200	AT2G07693	AT4G26260	AT1G77130	AT3G52850	AT1G61850	AT3G02090	AT3G48080		AT1G48090	AT1G79440
	AT4G37540		AT5G55560		AT5G12350	AT5G60680	AT5G16570	AT5G42860			AT3G02710	AT3G19390			AT2G17920	AT4G34250	AT2G07715	AT4G26270	AT1G77210	AT3G53270	AT1G62040	AT3G02170	AT4G25110		AT1G48160	AT1G79530
	AT4G37550		AT5G56100		AT5G13260	AT5G61440	AT5G17250	AT5G43280			AT3G02800	AT3G19520			AT2G17975	AT4G35750	AT2G07727	AT4G26400	AT1G77220	AT3G53280	AT1G62300	AT3G02340	AT4G01610		AT1G48170	AT1G79670
	AT4G37770		AT5G56320		AT5G13430	AT5G61910	AT5G17860	AT5G43670			AT3G02820	AT3G20060			AT2G18170	AT4G35780	AT2G11520	AT4G26430	AT1G77370	AT3G53310	AT1G62305	AT3G02630	AT5G57910		AT1G48210	AT1G79990
	AT4G37900		AT5G56550		AT5G14060	AT5G62180	AT5G18010	AT5G43980			AT3G02840	AT3G20280			AT2G18250	AT4G35830	AT2G12490	AT4G26620	AT1G77420	AT3G53630	AT1G62310	AT3G02650	AT4G20000		AT1G48280	AT1G80070
	AT4G38040		AT5G57340		AT5G14360	AT5G62270	AT5G18060	AT5G44569			AT3G03020	AT3G20290			AT2G18280	AT4G36040	AT2G12550	AT4G27290	AT1G77500	AT3G54070	AT1G62422	AT3G02770	AT3G28480		AT1G48320	AT1G80180
	AT4G38420		AT5G57660		AT5G14430	AT5G62760	AT5G18230	AT5G44570			AT3G03100	AT3G20670			AT2G18660	AT4G36450	AT2G13170	AT4G27450	AT1G77660	AT3G54270	AT1G62730	AT3G03020	AT2G27900		AT1G48370	AT1G80310
	AT4G38560		AT5G58005		AT5G14590	AT5G63020	AT5G18630	AT5G45160			AT3G03180	AT3G21060			AT2G18670	AT4G36670	AT2G13250	AT4G27460	AT1G77710	AT3G54440	AT1G62810	AT3G03870	AT1G63830		AT1G48420	AT1G80420
	AT4G38900		AT5G58060		AT5G15160	AT5G63180	AT5G18650	AT5G45360			AT3G03305	AT3G21350			AT2G18690	AT4G36790	AT2G13560	AT4G27470	AT1G77810	AT3G54750	AT1G62840	AT3G03950	AT2G31880		AT1G48430	AT1G80440
	AT4G39200		AT5G58375		AT5G15320	AT5G63280	AT5G18800	AT5G45650			AT3G03310	AT3G21351			AT2G18700	AT4G36970	AT2G13790	AT4G28270	AT1G78030	AT3G54860	AT1G63110	AT3G03990	AT1G78920		AT1G48490	AT1G80460
	AT4G39220		AT5G58930		AT5G15580	AT5G63470	AT5G19010	AT5G45810			AT3G03590	AT3G21360			AT2G19130	AT4G37190	AT2G13800	AT4G28300	AT1G78130	AT3G54880	AT1G63350	AT3G04090	AT5G37930		AT1G48550	AT1G80510
	AT4G39670		AT5G58960		AT5G15650	AT5G63480	AT5G19070	AT5G45840			AT3G03640	AT3G21420			AT2G19160	AT4G37260	AT2G13810	AT4G28470	AT1G78210	AT3G55700	AT1G63460	AT3G04240	AT1G28580		AT1G48605	AT1G80600
	AT5G01100		AT5G59080		AT5G15880	AT5G63890	AT5G19120	AT5G45900			AT3G03720	AT3G21430			AT2G19710	AT4G37370	AT2G14080	AT4G28510	AT1G78240	AT3G55840	AT1G63500	AT3G04670	AT1G14370		AT1G49000	AT1G80650
	AT5G01540		AT5G59430		AT5G16030	AT5G63970	AT5G19330	AT5G45990			AT3G03820	AT3G21781			AT2G19790	AT4G37610	AT2G14120	AT4G28652	AT1G78270	AT3G56240	AT1G63720	AT3G04910	AT1G09645		AT1G49032	AT1G80720
	AT5G01550		AT5G59450		AT5G16050	AT5G64160	AT5G19440	AT5G46150			AT3G03850	AT3G22110			AT2G19810	AT4G37820	AT2G14170	AT4G28703	AT1G78280	AT3G56440	AT1G63730	AT3G05010	AT2G45660		AT1G49040	AT1G80850
	AT5G01600		AT5G59580		AT5G16060	AT5G64270	AT5G19530	AT5G46210			AT3G03860	AT3G22400			AT2G20050	AT4G37830	AT2G14255	AT4G28860	AT1G78310	AT3G56550	AT1G63740	AT3G05090	AT1G49000		AT1G49050	AT1G80890
	AT5G01732		AT5G59800		AT5G16480	AT5G64350	AT5G20830	AT5G47080			AT3G03990	AT3G22425			AT2G20142	AT4G37900	AT2G14720	AT4G29190	AT1G78410	AT3G56690	AT1G63800	AT3G05120	AT2G45170		AT1G49130	AT1G80920
	AT5G02490		AT5G59820		AT5G16550	AT5G64780	AT5G20900	AT5G47240			AT3G04060	AT3G22430			AT2G20230	AT4G38470	AT2G14878	AT4G29560	AT1G78420	AT3G56720	AT1G63830	AT3G05200	AT2G44370		AT1G49210	AT1G80950
	AT5G02570		AT5G59960		AT5G16570	AT5G64813	AT5G21940	AT5G47520			AT3G04070	AT3G22930			AT2G20740	AT4G38600	AT2G15040	AT4G29735	AT1G78460	AT3G56930	AT1G63860	AT3G05650	AT5G04930		AT1G49240	AT1G80960
	AT5G02620		AT5G60190		AT5G17250	AT5G64910	AT5G22130	AT5G48560			AT3G04090	AT3G23030			AT2G20930	AT4G38630	AT2G15042	AT4G29750	AT1G78550	AT3G57240	AT1G63880	AT3G05710	AT5G15870		AT1G49300	AT2G01029
	AT5G03240		AT5G60730		AT5G17330	AT5G65207	AT5G22400	AT5G49510			AT3G04120	AT3G23080			AT2G20960	AT4G38900	AT2G15230	AT4G29950	AT1G78890	AT3G57480	AT1G64065	AT3G05830	AT3G12740		AT1G49480	AT2G01040
	AT5G04340		AT5G60760		AT5G18010	AT5G65260	AT5G22500	AT5G49945			AT3G04717	AT3G23110			AT2G21240	AT4G39070	AT2G15240	AT4G29960	AT1G78895	AT3G57520	AT1G64170	AT3G05970	AT2G20142		AT1G49500	AT2G01060
	AT5G04480		AT5G61600		AT5G18050	AT5G65560	AT5G22690	AT5G50410			AT3G04890	AT3G23480			AT2G21500	AT4G39090	AT2G15390	AT4G30150	AT1G78910	AT3G57680	AT1G64280	AT3G06050	AT2G23330		AT1G49710	AT2G01100
	AT5G04590		AT5G62575		AT5G18060	AT5G65660	AT5G22790	AT5G50970			AT3G05040	AT3G23635			AT2G21520	AT4G39363	AT2G15480	AT4G31240	AT1G78920	AT3G57930	AT1G64385	AT3G06170	AT1G16110		AT1G49720	AT2G01340
	AT5G05140		AT5G62720		AT5G18930	AT5G66120	AT5G22920	AT5G51300			AT3G05100	AT3G24200			AT2G21550	AT4G39910	AT2G15555	AT4G31340	AT1G79190	AT3G58270	AT1G64400	AT3G06380	AT5G05100		AT1G49820	AT2G01440
	AT5G05435		AT5G63400		AT5G19010	AT5G66380	AT5G23010	AT5G51370			AT3G05280	AT3G24315			AT2G21620	AT5G01560	AT2G15570	AT4G31420	AT1G79340	AT3G58530	AT1G64405	AT3G06450	AT4G34110		AT1G49850	AT2G01490
	AT5G05590		AT5G63905		AT5G19070	AT5G67520	AT5G23200	AT5G51840			AT3G05420	AT3G24982			AT2G22122	AT5G01620	AT2G15860	AT4G31810	AT1G79360	AT3G58750	AT1G64460	AT3G06500	AT4G03510		AT1G50030	AT2G01650
	AT5G05610		AT5G64100		AT5G19120	ATMG00660	AT5G23460	AT5G52545			AT3G05710	AT3G25180			AT2G22300	AT5G01980	AT2G15890	AT4G32060	AT1G79380	AT3G59380	AT1G64470	AT3G06580	AT1G07000		AT1G50360	AT2G01720
	AT5G05620		AT5G64190		AT5G19180		AT5G23670	AT5G53150			AT3G05910	AT3G25545			AT2G22425	AT5G02020	AT2G15900	AT4G32180	AT1G79590	AT3G59820	AT1G64520	AT3G06620	AT3G11010		AT1G50410	AT2G01840
	AT5G05760		AT5G64350		AT5G20830		AT5G24490	AT5G53340			AT3G06070	AT3G25760			AT2G22480	AT5G02150	AT2G15960	AT4G32280	AT1G79670	AT3G60190	AT1G64563	AT3G06850	AT5G10600		AT1G50430	AT2G01860
	AT5G05790		AT5G64380		AT5G20900		AT5G25190	AT5G54540			AT3G06320	AT3G25770			AT2G22660	AT5G02810	AT2G16000	AT4G32470	AT1G79680	AT3G60300	AT1G64570	AT3G07010	AT3G62370		AT1G50440	AT2G02050
	AT5G06320		AT5G64430		AT5G21070		AT5G26940	AT5G54730			AT3G06370	AT3G25910			AT2G22830	AT5G03610	AT2G16600	AT4G32530	AT1G79700	AT3G60470	AT1G64610	AT3G07060	AT5G01980		AT1G50480	AT2G02110
	AT5G06420		AT5G64750		AT5G21900		AT5G27520	AT5G54855			AT3G06483	AT3G25990			AT2G23310	AT5G04040	AT2G16710	AT4G32680	AT1G80180	AT3G60710	AT1G64710	AT3G07180	AT1G14260		AT1G50500	AT2G02180
	AT5G06930		AT5G65050		AT5G21940		AT5G28630	AT5G55850			AT3G06500	AT3G26380			AT2G23320	AT5G04220	AT2G16870	AT4G33210	AT1G80210	AT3G60740	AT1G64810	AT3G07390	AT3G16565		AT1G50520	AT2G02220
	AT5G07010		AT5G65440		AT5G22120		AT5G35330	AT5G55896			AT3G06540	AT3G26510			AT2G23330	AT5G04770	AT2G16930	AT4G33360	AT1G80310	AT3G61050	AT1G64890	AT3G07520	AT5G17990		AT1G50570	AT2G02360
	AT5G07590		AT5G65650		AT5G22130		AT5G36970	AT5G55940			AT3G06590	AT3G26890			AT2G23450	AT5G05010	AT2G17040	AT4G33910	AT1G80420	AT3G61060	AT1G64990	AT3G07568	AT5G42870		AT1G50735	AT2G02370
	AT5G07810		AT5G66130		AT5G22380		AT5G37420	AT5G56520			AT3G06860	AT3G27260			AT2G23680	AT5G05090	AT2G17110	AT4G33940	AT1G80450	AT3G61070	AT1G65040	AT3G07570	AT1G02360		AT1G50740	AT2G02410
	AT5G08260		AT5G66580		AT5G22400		AT5G39320	AT5G56730			AT3G07060	AT3G27310			AT2G23720	AT5G05100	AT2G17115	AT4G34030	AT1G80460	AT3G61180	AT1G65250	AT3G07580	AT5G66930		AT1G50940	AT2G02590
	AT5G08320		AT5G66650		AT5G22500		AT5G39580	AT5G56840			AT3G07110	AT3G27325			AT2G23770	AT5G05190	AT2G17120	AT4G34110	AT1G80510	AT3G61270	AT1G65270	AT3G07610	AT3G15070		AT1G51270	AT2G02710
	AT5G08565		ATCG00370		AT5G22790		AT5G39610	AT5G57500			AT3G07350	AT3G27460			AT2G23810	AT5G05320	AT2G17130	AT4G34450	AT1G80570	AT3G61570	AT1G65360	AT3G07680	AT1G30757		AT1G51402	AT2G02810
	AT5G09290		ATCG00400		AT5G22920		AT5G40650	AT5G57660			AT3G07525	AT3G27500			AT2G24160	AT5G05660	AT2G17200	AT4G34700	AT1G80820	AT3G61630	AT1G65481	AT3G07780	AT1G16260		AT1G51550	AT2G02960
	AT5G09410		ATCG00410		AT5G23010		AT5G40870	AT5G58640			AT3G07600	AT3G27930			AT2G24200	AT5G05750	AT2G17220	AT4G35220	AT1G80840	AT3G61710	AT1G65483	AT3G08550	AT2G33470		AT1G51590	AT2G02970
	AT5G09800		ATMG00110		AT5G23200		AT5G41000	AT5G58740			AT3G07640	AT3G28100			AT2G24240	AT5G05930	AT2G17290	AT4G35750	AT1G80920	AT3G61790	AT1G65484	AT3G08610	AT5G57010		AT1G51620	AT2G03120
	AT5G10030		ATMG00560		AT5G23535		AT5G41590	AT5G60200			AT3G07790	AT3G28180			AT2G24550	AT5G05987	AT2G17420	AT4G35780	AT1G80960	AT3G61900	AT1G65486	AT3G08650	AT3G25610		AT1G51645	AT2G03220
	AT5G10290		ATMG00570		AT5G23550		AT5G41670	AT5G60370			AT3G07940	AT3G28700			AT2G24600	AT5G06865	AT2G17440	AT4G35830	AT2G01060	AT3G62360	AT1G65500	AT3G08780	AT2G26190		AT1G51660	AT2G03510
	AT5G10380		ATMG00670		AT5G23670		AT5G41910	AT5G60680			AT3G08510	AT3G28720			AT2G24765	AT5G07010	AT2G17520	AT4G35850	AT2G01180	AT3G62370	AT1G65520	AT3G09020	AT3G60600		AT1G51790	AT2G03530
	AT5G10400				AT5G24490		AT5G42320	AT5G60870			AT3G08550	AT3G28857			AT2G25070	AT5G07150	AT2G17570	AT4G36040	AT2G01340	AT3G62550	AT1G65540	AT3G09030	AT3G50750		AT1G51800	AT2G03590
	AT5G10710				AT5G24530		AT5G42380	AT5G61150			AT3G08580	AT3G29035			AT2G25110	AT5G07820	AT2G17705	AT4G36210	AT2G01450	AT3G62650	AT1G65720	AT3G09040	AT5G55530		AT1G51850	AT2G03680
	AT5G10745				AT5G24620		AT5G42840	AT5G61440			AT3G08640	AT3G29100			AT2G25200	AT5G07860	AT2G17720	AT4G36450	AT2G01470	AT3G63400	AT1G65790	AT3G09410	AT5G06260		AT1G51860	AT2G03760
	AT5G11280				AT5G25040		AT5G42860	AT5G62270			AT3G08885	AT3G29330			AT2G25300	AT5G07870	AT2G17740	AT4G36670	AT2G01490	AT4G00240	AT1G65800	AT3G09735	AT2G26600		AT1G51890	AT2G03870
	AT5G11290				AT5G25190		AT5G43280	AT5G62760			AT3G08890	AT3G29670			AT2G25470	AT5G08290	AT2G17760	AT4G36970	AT2G01540	AT4G00355	AT1G65820	AT3G09740	AT1G47420		AT1G51920	AT2G04070
	AT5G11520				AT5G26940		AT5G43320	AT5G62950			AT3G08940	AT3G30620			AT2G25490	AT5G08580	AT2G17880	AT4G37190	AT2G01650	AT4G00590	AT1G65845	AT3G09960	AT3G14090		AT1G51940	AT2G04080
	AT5G11600				AT5G27395		AT5G43430	AT5G63020			AT3G09200	AT3G30775			AT2G25520	AT5G08670	AT2G17920	AT4G37260	AT2G02010	AT4G00752	AT1G65850	AT3G10010	AT5G17880		AT1G52200	AT2G04430
	AT5G11800				AT5G27520		AT5G43460	AT5G63180			AT3G09580	AT3G42050			AT2G25735	AT5G08690	AT2G17975	AT4G37370	AT2G02040	AT4G00780	AT1G65970	AT3G10020	AT2G07180		AT1G52360	AT2G04490
	AT5G11890				AT5G27850		AT5G43600	AT5G63280			AT3G09690	AT3G42800			AT2G25850	AT5G09310	AT2G18250	AT4G37390	AT2G02060	AT4G00800	AT1G65980	AT3G10250	AT5G61590		AT1G52420	AT2G04530
	AT5G11920				AT5G28320		AT5G43700	AT5G63480			AT3G09860	AT3G42883			AT2G25930	AT5G09880	AT2G18280	AT4G37830	AT2G02180	AT4G01000	AT1G66090	AT3G10850	AT1G12360		AT1G52450	AT2G04550
	AT5G12040				AT5G28630		AT5G44005	AT5G63830			AT3G09900	AT3G43230			AT2G26190	AT5G09900	AT2G18660	AT4G38470	AT2G02220	AT4G01480	AT1G66240	AT3G11080	AT1G17455		AT1G52600	AT2G04690
	AT5G12050				AT5G28646		AT5G44210	AT5G63870			AT3G10320	AT3G44280			AT2G26230	AT5G10560	AT2G18670	AT4G38540	AT2G02360	AT4G01610	AT1G66410	AT3G11230	AT5G27950		AT1G52710	AT2G04852
	AT5G12140				AT5G35330		AT5G44380	AT5G64160			AT3G10370	AT3G44550			AT2G26240	AT5G10695	AT2G18690	AT4G38630	AT2G02370	AT4G01740	AT1G66590	AT3G11402	AT1G21110		AT1G52780	AT2G04860
	AT5G12880				AT5G35730		AT5G44720	AT5G64220			AT3G10815	AT3G44600			AT2G26300	AT5G10780	AT2G18700	AT4G38800	AT2G02390	AT4G01910	AT1G66600	AT3G11450	AT3G26090		AT1G52800	AT2G04865
	AT5G12950				AT5G37420		AT5G45340	AT5G64260			AT3G10920	AT3G44970			AT2G26400	AT5G10860	AT2G18750	AT4G38932	AT2G02410	AT4G01920	AT1G66670	AT3G11800	AT5G56660		AT1G53030	AT2G04890
	AT5G13420				AT5G38110		AT5G47370	AT5G64270			AT3G10930	AT3G45190			AT2G26430	AT5G11040	AT2G19110	AT4G39090	AT2G02710	AT4G02050	AT1G66680	AT3G11890	AT2G24600		AT1G53100	AT2G04900
	AT5G13550				AT5G38850		AT5G47900	AT5G64470			AT3G11240	AT3G45390			AT2G26440	AT5G11060	AT2G19130	AT4G39910	AT2G02760	AT4G02230	AT1G66700	AT3G11910	AT4G18250		AT1G53110	AT2G05120
	AT5G13750				AT5G39580		AT5G47960	AT5G64600			AT3G11280	AT3G45660			AT2G26510	AT5G11280	AT2G19160	AT5G01010	AT2G02850	AT4G02370	AT1G66880	AT3G12100	AT4G34460		AT1G53160	AT2G05160
	AT5G14180				AT5G40650		AT5G48430	AT5G64750			AT3G11340	AT3G46590			AT2G26530	AT5G11720	AT2G19180	AT5G01370	AT2G02930	AT4G02480	AT1G66910	AT3G12290	AT5G46330		AT1G53165	AT2G05240
	AT5G14210				AT5G40670		AT5G48960	AT5G64890			AT3G11510	AT3G46660			AT2G26560	AT5G12120	AT2G19710	AT5G01620	AT2G02960	AT4G03560	AT1G66920	AT3G12360	AT2G31870		AT1G53170	AT2G05840
	AT5G14430				AT5G40870		AT5G49525	AT5G64910			AT3G11570	AT3G47300			AT2G26600	AT5G12340	AT2G19740	AT5G01800	AT2G03330	AT4G04105	AT1G66960	AT3G12490	AT1G01180		AT1G53280	AT2G06025
	AT5G14470				AT5G41100		AT5G49690	AT5G65207			AT3G11580	AT3G47540			AT2G26650	AT5G12350	AT2G19790	AT5G01980	AT2G03410	AT4G04110	AT1G66970	AT3G12570	AT1G57630		AT1G53320	AT2G06095
	AT5G14540				AT5G41110		AT5G49945	AT5G65480			AT3G11590	AT3G47560			AT2G26970	AT5G12370	AT2G19800	AT5G02020	AT2G03450	AT4G04180	AT1G67000	AT3G12600	AT2G17110		AT1G53330	AT2G06230
	AT5G14590				AT5G41590		AT5G50330	AT5G65660			AT3G11780	AT3G47610			AT2G27020	AT5G13010	AT2G19810	AT5G02040	AT2G03530	AT4G04280	AT1G67060	AT3G12710	AT4G25940		AT1G53350	AT2G06490
	AT5G15022				AT5G42380		AT5G50335	AT5G65760			AT3G11800	AT3G47620			AT2G27050	AT5G13190	AT2G20142	AT5G02150	AT2G03540	AT4G04560	AT1G67190	AT3G12760	AT1G16240		AT1G53390	AT2G06740
	AT5G15130				AT5G42840		AT5G50850	AT5G66380			AT3G12030	AT3G47730			AT2G27200	AT5G13390	AT2G20420	AT5G03240	AT2G03590	AT4G04790	AT1G67250	AT3G12950	AT4G03560		AT1G53400	AT2G06790
	AT5G15650				AT5G42860		AT5G50870	AT5G66480			AT3G12145	AT3G47850			AT2G27600	AT5G13570	AT2G20630	AT5G03460	AT2G03690	AT4G04925	AT1G67265	AT3G12980	AT1G73805		AT1G53430	AT2G06930
	AT5G16050				AT5G43320		AT5G50970	AT5G67230			AT3G12680	AT3G47930			AT2G27830	AT5G14105	AT2G20780	AT5G03610	AT2G03760	AT4G05060	AT1G67310	AT3G13062	AT1G08930		AT1G53440	AT2G06980
	AT5G16060				AT5G43430		AT5G51190	AT5G67410			AT3G13060	AT3G47990			AT2G27900	AT5G14240	AT2G20900	AT5G04040	AT2G04040	AT4G05070	AT1G67490	AT3G13065	AT5G43780		AT1G53560	AT2G07050
	AT5G17860				AT5G43450		AT5G52545	AT5G67520			AT3G13062	AT3G48210			AT2G28120	AT5G14540	AT2G20960	AT5G04220	AT2G04070	AT4G05150	AT1G67510	AT3G13080	AT4G05070		AT1G53580	AT2G07180
	AT5G18010				AT5G43460		AT5G52870	ATCG00570			AT3G13080	AT3G48590			AT2G28360	AT5G15640	AT2G21120	AT5G04920	AT2G04080	AT4G05497	AT1G67520	AT3G13090	AT3G01850		AT1G53590	AT2G07240
	AT5G18050				AT5G43700		AT5G52890	ATMG00660			AT3G13200	AT3G48600			AT2G28630	AT5G15860	AT2G21240	AT5G05010	AT2G04490	AT4G05540	AT1G67550	AT3G13100	AT2G36360		AT1G53625	AT2G07360
	AT5G18590				AT5G43830		AT5G53120				AT3G13437	AT3G48880			AT2G28830	AT5G16080	AT2G21470	AT5G05090	AT2G04690	AT4G06558	AT1G67560	AT3G13310	AT4G24040		AT1G53710	AT2G07750
	AT5G18760				AT5G44005		AT5G54190				AT3G13560	AT3G49130			AT2G28840	AT5G16120	AT2G21500	AT5G05100	AT2G04852	AT4G06588	AT1G67800	AT3G13430	AT5G25440		AT1G53770	AT2G09960
	AT5G18900				AT5G44210		AT5G54270				AT3G13610	AT3G49160			AT2G28890	AT5G16150	AT2G21520	AT5G05660	AT2G04860	AT4G06642	AT1G67810	AT3G13433	AT3G42790		AT1G53810	AT2G10040
	AT5G18930				AT5G44260		AT5G54510				AT3G13672	AT3G49340			AT2G28940	AT5G16180	AT2G21620	AT5G05750	AT2G04890	AT4G06654	AT1G67850	AT3G13437	AT2G28940		AT1G53830	AT2G11290
	AT5G19070				AT5G45140		AT5G54855				AT3G13677	AT3G49400			AT2G29020	AT5G16270	AT2G21850	AT5G05780	AT2G05030	AT4G07874	AT1G67860	AT3G13450	AT5G18210		AT1G53850	AT2G11500
	AT5G19180				AT5G45550		AT5G54900				AT3G13720	AT3G49570			AT2G29070	AT5G16370	AT2G21870	AT5G05930	AT2G05040	AT4G08000	AT1G67920	AT3G13550	AT3G51340		AT1G53860	AT2G11670
	AT5G19190				AT5G46710		AT5G55190				AT3G14120	AT3G49590			AT2G29100	AT5G16510	AT2G22122	AT5G06140	AT2G05320	AT4G08290	AT1G67970	AT3G13610	AT1G14170		AT1G53910	AT2G11880
	AT5G19440				AT5G46871		AT5G55500				AT3G14220	AT3G49880			AT2G29340	AT5G16800	AT2G22300	AT5G06370	AT2G05380	AT4G08580	AT1G67980	AT3G13720	AT4G21450		AT1G54000	AT2G12210
	AT5G19550				AT5G47040		AT5G55896				AT3G14280	AT3G50010			AT2G29400	AT5G18110	AT2G22310	AT5G06860	AT2G05520	AT4G08600	AT1G68000	AT3G13860	AT3G53800		AT1G54030	AT2G12260
	AT5G19680				AT5G47240		AT5G55940				AT3G14370	AT3G50040			AT2G29670	AT5G18130	AT2G22425	AT5G06865	AT2G05840	AT4G09425	AT1G68100	AT3G14010	AT5G57220		AT1G54090	AT2G12490
	AT5G19880				AT5G47370		AT5G56100				AT3G14410	AT3G50060			AT2G29720	AT5G18170	AT2G22480	AT5G07010	AT2G06025	AT4G09595	AT1G68300	AT3G14050	AT4G02480		AT1G54100	AT2G12550
	AT5G20180				AT5G47900		AT5G56190				AT3G14610	AT3G50070			AT2G29990	AT5G18630	AT2G22500	AT5G07150	AT2G06510	AT4G09770	AT1G68330	AT3G14120	AT3G23550		AT1G54115	AT2G13100
	AT5G20230				AT5G48580		AT5G56220				AT3G14910	AT3G50270			AT2G30250	AT5G18640	AT2G22630	AT5G07215	AT2G06530	AT4G10080	AT1G68650	AT3G14310	AT4G05330		AT1G54130	AT2G13170
	AT5G20480				AT5G49525		AT5G56320				AT3G14930	AT3G50520			AT2G30260	AT5G18650	AT2G22660	AT5G07790	AT2G07180	AT4G10320	AT1G68710	AT3G14430	AT1G17340		AT1G54150	AT2G13250
	AT5G20830				AT5G49555		AT5G57660				AT3G15110	AT3G50760			AT2G30440	AT5G19010	AT2G22690	AT5G07860	AT2G07808	AT4G10790	AT1G68765	AT3G14460	AT1G14010		AT1G54170	AT2G13260
	AT5G20885				AT5G49710		AT5G57780				AT3G15290	AT3G50800			AT2G30530	AT5G19120	AT2G22830	AT5G07870	AT2G07811	AT4G10930	AT1G68820	AT3G14470	AT1G08050		AT1G54210	AT2G13560
	AT5G20900				AT5G50335		AT5G58005				AT3G15450	AT3G50850			AT2G30550	AT5G19140	AT2G22880	AT5G07910	AT2G11520	AT4G10980	AT1G69270	AT3G14560	AT2G28840		AT1G54320	AT2G13790
	AT5G21070				AT5G50850		AT5G58670				AT3G15500	AT3G51010			AT2G30590	AT5G19530	AT2G23200	AT5G08120	AT2G12210	AT4G10990	AT1G69450	AT3G14830	AT5G64810		AT1G54360	AT2G13810
	AT5G21900				AT5G50870		AT5G58700				AT3G15536	AT3G51040			AT2G30600	AT5G19690	AT2G23310	AT5G08160	AT2G12490	AT4G11300	AT1G69460	AT3G14840	AT1G03900		AT1G54410	AT2G14040
	AT5G21940				AT5G50970		AT5G58930				AT3G15540	AT3G51110			AT2G30770	AT5G20000	AT2G23320	AT5G08290	AT2G12550	AT4G11470	AT1G69520	AT3G15070	AT2G32030		AT1G54490	AT2G14080
	AT5G22130				AT5G51960		AT5G58960				AT3G15610	AT3G51990			AT2G30880	AT5G20660	AT2G23330	AT5G08670	AT2G13100	AT4G11530	AT1G69550	AT3G15355	AT4G25515		AT1G54575	AT2G14120
	AT5G22250				AT5G52390		AT5G59450				AT3G15640	AT3G52030			AT2G31020	AT5G21170	AT2G23450	AT5G08690	AT2G13650	AT4G11690	AT1G69720	AT3G15450	AT4G08850		AT1G54660	AT2G14255
	AT5G22380				AT5G52545		AT5G59870				AT3G15660	AT3G52060			AT2G31350	AT5G21940	AT2G23680	AT5G09420	AT2G13790	AT4G11900	AT1G69840	AT3G15580	AT3G03855		AT1G54730	AT2G14260
	AT5G22390				AT5G52870		AT5G59960				AT3G15710	AT3G52070			AT2G31585	AT5G22270	AT2G23720	AT5G09620	AT2G13800	AT4G12460	AT1G69850	AT3G15610	AT4G25030		AT1G54990	AT2G14620
	AT5G22400				AT5G52890		AT5G60190				AT3G15730	AT3G52072			AT2G31800	AT5G22500	AT2G23770	AT5G09900	AT2G13810	AT4G12850	AT1G69890	AT3G15630	AT5G61260		AT1G55050	AT2G14720
	AT5G22540				AT5G53120		AT5G60680				AT3G16460	AT3G52570			AT2G31810	AT5G22790	AT2G23810	AT5G10400	AT2G14120	AT4G13030	AT1G69900	AT3G15730	AT2G21500		AT1G55090	AT2G14740
	AT5G22580				AT5G54190		AT5G61780				AT3G17430	AT3G52730			AT2G31865	AT5G22920	AT2G24160	AT5G10560	AT2G14170	AT4G13430	AT1G70140	AT3G15760	AT3G50900		AT1G55280	AT2G14878
	AT5G22690				AT5G54440		AT5G61890				AT3G17850	AT3G52860			AT2G31870	AT5G23050	AT2G24240	AT5G10695	AT2G14680	AT4G13810	AT1G70150	AT3G15840	AT1G08450		AT1G55365	AT2G15042
	AT5G23130				AT5G54510		AT5G62290				AT3G17860	AT3G53020			AT2G31880	AT5G23240	AT2G24360	AT5G10780	AT2G14720	AT4G13820	AT1G70160	AT3G15970	AT1G30370		AT1G55420	AT2G15230
	AT5G23240				AT5G54800		AT5G62390				AT3G17910	AT3G53210			AT2G31945	AT5G23540	AT2G24600	AT5G10790	AT2G14830	AT4G13890	AT1G70330	AT3G16565	AT2G36320		AT1G55430	AT2G15240
	AT5G23460				AT5G54900		AT5G62575				AT3G18030	AT3G53340			AT2G31955	AT5G23575	AT2G24765	AT5G10840	AT2G14878	AT4G14070	AT1G70420	AT3G16700	AT3G26910		AT1G55450	AT2G15860
	AT5G23535				AT5G55190		AT5G62720				AT3G18050	AT3G53570			AT2G31990	AT5G23660	AT2G25070	AT5G11040	AT2G15040	AT4G14270	AT1G70518	AT3G16740	AT3G21520		AT1G55510	AT2G15880
	AT5G23550				AT5G55500		AT5G63180				AT3G18140	AT3G53600			AT2G32010	AT5G24090	AT2G25110	AT5G11060	AT2G15042	AT4G14610	AT1G70520	AT3G16785	AT5G07100		AT1G55590	AT2G15890
	AT5G23850				AT5G56100		AT5G63400				AT3G18170	AT3G53650			AT2G32030	AT5G24520	AT2G25200	AT5G11720	AT2G15230	AT4G14660	AT1G70530	AT3G17020	AT2G01450		AT1G55610	AT2G15900
	AT5G26030				AT5G56190		AT5G63470				AT3G18350	AT3G53960			AT2G32520	AT5G25050	AT2G25490	AT5G11910	AT2G15240	AT4G14716	AT1G70581	AT3G17205	AT2G38000		AT1G55730	AT2G16050
	AT5G26940				AT5G56220		AT5G63490				AT3G18480	AT3G54750			AT2G32680	AT5G25210	AT2G25510	AT5G12085	AT2G15390	AT4G14720	AT1G70590	AT3G17410	AT2G32900		AT1G55850	AT2G16310
	AT5G27060				AT5G56320		AT5G63790				AT3G18580	AT3G54826			AT2G32700	AT5G25265	AT2G25520	AT5G12120	AT2G15480	AT4G14746	AT1G70620	AT3G17420	AT1G61370		AT1G55860	AT2G16380
	AT5G27520				AT5G56550		AT5G64100				AT3G18740	AT3G54950			AT2G32880	AT5G25270	AT2G25735	AT5G12340	AT2G15880	AT4G14820	AT1G70690	AT3G18080	AT1G32460		AT1G56060	AT2G16420
	AT5G28630				AT5G57340		AT5G64190				AT3G18760	AT3G55140			AT2G32900	AT5G25350	AT2G25740	AT5G12350	AT2G15890	AT4G15070	AT1G70980	AT3G18270	AT4G36500		AT1G56120	AT2G16600
	AT5G28646				AT5G57460		AT5G64350				AT3G18770	AT3G55240			AT2G33080	AT5G25900	AT2G25850	AT5G12370	AT2G15900	AT4G15093	AT1G71040	AT3G18350	AT4G15260		AT1G56130	AT2G16640
	AT5G33290				AT5G57550		AT5G64660				AT3G19030	AT3G55440			AT2G33120	AT5G26340	AT2G25910	AT5G13010	AT2G15960	AT4G15236	AT1G71080	AT3G18370	AT1G62300		AT1G56140	AT2G16650
	AT5G35790				AT5G57660		AT5G64750				AT3G19380	AT3G55480			AT2G33150	AT5G26660	AT2G26190	AT5G13190	AT2G16060	AT4G15760	AT1G71190	AT3G18690	AT3G06450		AT1G56145	AT2G16660
	AT5G37420				AT5G57780		AT5G64760				AT3G19580	AT3G55560			AT2G33220	AT5G27345	AT2G26300	AT5G13260	AT2G16405	AT4G15990	AT1G71220	AT3G18770	AT5G56230		AT1G56150	AT2G16680
	AT5G38110				AT5G58030		AT5G64800				AT3G19640	AT3G55600			AT2G33390	AT5G27420	AT2G26440	AT5G13450	AT2G16595	AT4G16000	AT1G71390	AT3G18860	AT1G72280		AT1G56165	AT2G16690
	AT5G39080				AT5G58060		AT5G64813				AT3G19660	AT3G55740			AT2G33470	AT5G27430	AT2G26510	AT5G13570	AT2G16660	AT4G16130	AT1G71400	AT3G18930	AT4G17660		AT1G56190	AT2G16700
	AT5G39320				AT5G58670		AT5G65050				AT3G19990	AT3G55970			AT2G33490	AT5G27650	AT2G26530	AT5G14240	AT2G16710	AT4G16162	AT1G71410	AT3G19190	AT5G25790		AT1G56220	AT2G16710
	AT5G39510				AT5G58700		AT5G65360				AT3G20060	AT3G56470			AT2G33630	AT5G27660	AT2G26560	AT5G14580	AT2G16790	AT4G16190	AT1G71520	AT3G19270	AT2G44490		AT1G56240	AT2G16900
	AT5G39580				AT5G58960		AT5G65440				AT3G20290	AT3G56500			AT2G33810	AT5G27850	AT2G26600	AT5G15640	AT2G16870	AT4G16420	AT1G71697	AT3G19290	AT4G23270		AT1G56250	AT2G17110
	AT5G39790				AT5G59010		AT5G65650				AT3G20390	AT3G56580			AT2G33830	AT5G27950	AT2G26650	AT5G15860	AT2G17040	AT4G16520	AT1G71800	AT3G19400	AT2G26970		AT1G56280	AT2G17115
	AT5G40240				AT5G59080		AT5G66120				AT3G20395	AT3G56640			AT2G34430	AT5G28335	AT2G26970	AT5G16070	AT2G17060	AT4G16830	AT1G71820	AT3G19420	AT1G30200		AT1G56300	AT2G17120
	AT5G40500				AT5G59410		AT5G66130				AT3G20420	AT3G57100			AT2G34470	AT5G28770	AT2G27020	AT5G16120	AT2G17110	AT4G16900	AT1G71865	AT3G19460	AT5G04910		AT1G56340	AT2G17200
	AT5G40650				AT5G59450		AT5G66200				AT3G21351	AT3G57580			AT2G35060	AT5G28785	AT2G27150	AT5G16180	AT2G17120	AT4G17640	AT1G71880	AT3G19490	AT5G53110		AT1G56423	AT2G17420
	AT5G41210				AT5G59662		AT5G66590				AT3G21420	AT3G57750			AT2G35680	AT5G35080	AT2G27200	AT5G16270	AT2G17130	AT4G17900	AT1G71950	AT3G19553	AT2G36470		AT1G56440	AT2G17450
	AT5G41220				AT5G59870		AT5G66650				AT3G21610	AT3G57760			AT2G35690	AT5G35200	AT2G27310	AT5G16370	AT2G17200	AT4G18210	AT1G71980	AT3G19580	AT3G62550		AT1G56450	AT2G17520
	AT5G41590				AT5G59880		AT5G66658				AT3G22110	AT3G57790			AT2G35980	AT5G35590	AT2G27480	AT5G16510	AT2G17290	AT4G18520	AT1G72000	AT3G20050	AT1G70420		AT1G56460	AT2G17525
	AT5G41670				AT5G59960		AT5G66860				AT3G22160	AT3G57870			AT2G36060	AT5G35777	AT2G27600	AT5G16880	AT2G17520	AT4G18990	AT1G72010	AT3G20290	AT1G55450		AT1G56470	AT2G17550
	AT5G41740				AT5G60190		AT5G67080				AT3G22200	AT3G58170			AT2G36305	AT5G37710	AT2G27660	AT5G17125	AT2G17525	AT4G19160	AT1G72060	AT3G20420	AT2G22425		AT1G56520	AT2G17560
	AT5G41860				AT5G60680		AT5G67310				AT3G22230	AT3G58380			AT2G36320	AT5G37740	AT2G27900	AT5G17270	AT2G17570	AT4G19180	AT1G72070	AT3G20440	AT4G05460		AT1G56540	AT2G17570
	AT5G42380				AT5G60730		AT5G67520				AT3G22260	AT3G58670			AT2G36330	AT5G37780	AT2G28120	AT5G17990	AT2G17705	AT4G19190	AT1G72280	AT3G20770	AT5G27430		AT1G56550	AT2G17730
	AT5G42650				AT5G60760		ATCG00210				AT3G22910	AT3G58710			AT2G36360	AT5G38710	AT2G28630	AT5G18110	AT2G17710	AT4G19420	AT1G72330	AT3G20960	AT5G64905		AT1G56590	AT2G17790
	AT5G42840				AT5G62280		ATCG00230				AT3G22942	AT3G58760			AT2G36400	AT5G38850	AT2G28830	AT5G18170	AT2G17975	AT4G19700	AT1G72416	AT3G21175	AT5G63880		AT1G56700	AT2G17880
	AT5G42860				AT5G62290		ATCG00400				AT3G23030	AT3G59010			AT2G36420	AT5G39050	AT2G28840	AT5G18620	AT2G17990	AT4G19840	AT1G72540	AT3G21520	AT3G27530		AT1G57540	AT2G17920
	AT5G43420				AT5G62390		ATMG00110				AT3G23080	AT3G59080			AT2G36470	AT5G39660	AT2G28890	AT5G18780	AT2G18000	AT4G19860	AT1G72680	AT3G21640	AT5G53160		AT1G57560	AT2G17975
	AT5G44005				AT5G62720		ATMG00560				AT3G23110	AT3G59150			AT2G36680	AT5G39950	AT2G28940	AT5G19140	AT2G18050	AT4G19870	AT1G72710	AT3G21805	AT4G20830		AT1G57620	AT2G18170
	AT5G44380				AT5G62790		ATMG00570				AT3G23170	AT3G59300			AT2G37110	AT5G40170	AT2G29020	AT5G19165	AT2G18170	AT4G20400	AT1G72855	AT3G21810	AT5G61530		AT1G57630	AT2G18250
	AT5G44420				AT5G63180		ATMG00670				AT3G23240	AT3G59750			AT2G37150	AT5G40190	AT2G29100	AT5G19200	AT2G18250	AT4G20410	AT1G72950	AT3G22060	AT3G61860		AT1G57650	AT2G18280
	AT5G44430				AT5G63225		ATMG00690				AT3G23250	AT3G59930			AT2G37430	AT5G40580	AT2G29110	AT5G19530	AT2G18350	AT4G21450	AT1G73030	AT3G22190	AT3G60470		AT1G57765	AT2G18290
	AT5G45130				AT5G63260		ATMG00730				AT3G23690	AT3G59940			AT2G37520	AT5G40720	AT2G29340	AT5G19690	AT2G18650	AT4G21810	AT1G73200	AT3G22460	AT1G67060		AT1G57790	AT2G18330
	AT5G45340				AT5G63400						AT3G24350	AT3G59950			AT2G37678	AT5G40890	AT2G29400	AT5G19880	AT2G18660	AT4G21880	AT1G73250	AT3G22600	AT4G04860		AT1G57870	AT2G18350
	AT5G46350				AT5G63470						AT3G24830	AT3G60160			AT2G37710	AT5G40990	AT2G29720	AT5G20500	AT2G18670	AT4G21960	AT1G73380	AT3G22910	AT2G33830		AT1G57990	AT2G18390
	AT5G46470				AT5G63490						AT3G25040	AT3G60170			AT2G37840	AT5G41100	AT2G29990	AT5G20660	AT2G18690	AT4G22540	AT1G73655	AT3G23010	AT5G55460		AT1G58030	AT2G18660
	AT5G47200				AT5G63790						AT3G25510	AT3G60200			AT2G37920	AT5G42080	AT2G30250	AT5G20890	AT2G18750	AT4G22960	AT1G73680	AT3G23690	AT4G33430		AT1G58060	AT2G18670
	AT5G47220				AT5G64010						AT3G25600	AT3G60240			AT2G37940	AT5G42090	AT2G30260	AT5G20950	AT2G19110	AT4G23760	AT1G73805	AT3G24900	AT1G53440		AT1G58110	AT2G18700
	AT5G47240				AT5G64190						AT3G25717	AT3G60340			AT2G37950	AT5G42420	AT2G30440	AT5G21010	AT2G19130	AT4G23880	AT1G73810	AT3G24927	AT5G40370		AT1G58180	AT2G18750
	AT5G47370				AT5G64350						AT3G25760	AT3G60410			AT2G37980	AT5G42790	AT2G30530	AT5G22000	AT2G19160	AT4G24040	AT1G73980	AT3G25020	AT2G47760		AT1G58190	AT2G18876
	AT5G47390				AT5G64380						AT3G25770	AT3G61060			AT2G38000	AT5G42830	AT2G30550	AT5G22270	AT2G19180	AT4G24230	AT1G74080	AT3G25040	AT4G30640		AT1G58200	AT2G19110
	AT5G47850				AT5G64760						AT3G25780	AT3G61270			AT2G38290	AT5G42870	AT2G30720	AT5G22310	AT2G19350	AT4G24450	AT1G74088	AT3G25250	AT3G01290		AT1G58220	AT2G19250
	AT5G47900				AT5G64780						AT3G26170	AT3G61350			AT2G38410	AT5G42950	AT2G30770	AT5G22450	AT2G19790	AT4G24520	AT1G74100	AT3G25510	AT1G42990		AT1G58225	AT2G19520
	AT5G47960				AT5G64800						AT3G26370	AT3G61880			AT2G38470	AT5G43060	AT2G30880	AT5G22500	AT2G19800	AT4G24690	AT1G74170	AT3G25610	AT4G36760		AT1G58230	AT2G19740
	AT5G48430				AT5G64813						AT3G26440	AT3G61930			AT2G38550	AT5G43320	AT2G30980	AT5G22850	AT2G19950	AT4G25110	AT1G74210	AT3G25910	AT5G45660		AT1G58235	AT2G19790
	AT5G48960				AT5G65050						AT3G26470	AT3G62010			AT2G38860	AT5G43830	AT2G31020	AT5G23050	AT2G20050	AT4G25835	AT1G74230	AT3G26115	AT5G62900		AT1G58300	AT2G19800
	AT5G49520				AT5G65360						AT3G26510	AT3G62070			AT2G39100	AT5G43940	AT2G31060	AT5G23540	AT2G20120	AT4G25940	AT1G74280	AT3G26165	AT3G18690		AT1G58360	AT2G19810
	AT5G49525				AT5G65440						AT3G26690	AT3G62080			AT2G39210	AT5G44260	AT2G31200	AT5G23660	AT2G20142	AT4G25970	AT1G74300	AT3G26170	AT4G29900		AT1G58410	AT2G19950
	AT5G49690				AT5G65660						AT3G26840	AT3G62220			AT2G39400	AT5G44572	AT2G31350	AT5G24205	AT2G20230	AT4G26180	AT1G74330	AT3G26180	AT4G32040		AT1G58420	AT2G20050
	AT5G50330				AT5G66290						AT3G27000	AT3G62455			AT2G39530	AT5G44575	AT2G31585	AT5G24240	AT2G20320	AT4G26380	AT1G74340	AT3G26220	AT1G08350		AT1G59520	AT2G20060
	AT5G50850				AT5G66420						AT3G27230	AT3G62650			AT2G39550	AT5G45110	AT2G31800	AT5G24260	AT2G20740	AT4G26400	AT1G74360	AT3G26280	AT1G62305		AT1G59580	AT2G20360
	AT5G50950				AT5G66510						AT3G27280	AT3G62770			AT2G39660	AT5G45340	AT2G31810	AT5G24910	AT2G20780	AT4G26620	AT1G74440	AT3G26500	AT1G76700		AT1G59590	AT2G20390
	AT5G50970				AT5G66580						AT3G27310	AT3G63000			AT2G39705	AT5G45490	AT2G31865	AT5G25050	AT2G20850	AT4G27010	AT1G74590	AT3G26600	AT2G02360		AT1G59600	AT2G20420
	AT5G51190				AT5G66590						AT3G27470	AT3G63210			AT2G39920	AT5G45750	AT2G31870	AT5G25190	AT2G20960	AT4G27270	AT1G74650	AT3G26720	AT2G15480		AT1G59610	AT2G20530
	AT5G51380				AT5G66650						AT3G27500	AT3G63240			AT2G39960	AT5G46050	AT2G31880	AT5G25210	AT2G21240	AT4G27450	AT1G74680	AT3G26740	AT3G52240		AT1G59620	AT2G20670
	AT5G51640				AT5G66658						AT3G27610	AT3G63290			AT2G39980	AT5G46710	AT2G31955	AT5G25265	AT2G21250	AT4G27460	AT1G74710	AT3G27230	AT3G16030		AT1G59650	AT2G20850
	AT5G52390				AT5G66860						AT3G27880	AT3G63440			AT2G40000	AT5G46871	AT2G31990	AT5G25270	AT2G21410	AT4G27470	AT1G74790	AT3G27260	AT2G35980		AT1G59710	AT2G20930
	AT5G52545				AT5G67080						AT3G27970	AT4G00200			AT2G40095	AT5G47010	AT2G32030	AT5G26340	AT2G21500	AT4G27745	AT1G75040	AT3G27530	AT1G73250		AT1G59820	AT2G20960
	AT5G52560				AT5G67520						AT3G27997	AT4G00440			AT2G40110	AT5G47020	AT2G32140	AT5G26830	AT2G21520	AT4G27880	AT1G75130	AT3G28480	AT2G25200		AT1G59870	AT2G21240
	AT5G52580				ATMG00670						AT3G28050	AT4G00750			AT2G40140	AT5G47770	AT2G32200	AT5G26860	AT2G21550	AT4G28220	AT1G75140	AT3G28850	AT1G76920		AT1G59900	AT2G21250
	AT5G52870										AT3G28100	AT4G01020			AT2G40180	AT5G48160	AT2G32210	AT5G27320	AT2G21660	AT4G28270	AT1G75190	AT3G28910	AT5G40720		AT1G60140	AT2G21410
	AT5G53120										AT3G28340	AT4G01026			AT2G40410	AT5G49650	AT2G32680	AT5G27380	AT2G21840	AT4G28510	AT1G75380	AT3G29035	AT5G19130		AT1G60420	AT2G21430
	AT5G54190										AT3G28370	AT4G01330			AT2G40420	AT5G50200	AT2G32700	AT5G27420	AT2G21850	AT4G28560	AT1G75510	AT3G29075	AT2G23680		AT1G60440	AT2G21500
	AT5G54750										AT3G28510	AT4G01350			AT2G40600	AT5G51400	AT2G32800	AT5G27430	AT2G21950	AT4G28652	AT1G75850	AT3G29240	AT5G04020		AT1G60490	AT2G21520
	AT5G54800										AT3G28580	AT4G01400			AT2G40740	AT5G52890	AT2G32880	AT5G27470	AT2G22300	AT4G28860	AT1G76040	AT3G29320	AT3G60300		AT1G60730	AT2G21840
	AT5G54940										AT3G28857	AT4G01450			AT2G40880	AT5G53160	AT2G32900	AT5G27650	AT2G22310	AT4G28880	AT1G76150	AT3G29400	AT2G45510		AT1G60780	AT2G21850
	AT5G55190										AT3G28890	AT4G01850			AT2G40940	AT5G53460	AT2G33080	AT5G27850	AT2G22425	AT4G29050	AT1G76185	AT3G29575	AT5G65110		AT1G60830	AT2G21870
	AT5G55500										AT3G28910	AT4G01860			AT2G40970	AT5G53550	AT2G33110	AT5G27920	AT2G22500	AT4G29190	AT1G76200	AT3G30775	AT5G47580		AT1G60870	AT2G21950
	AT5G55560										AT3G29000	AT4G02120			AT2G41100	AT5G53560	AT2G33120	AT5G35080	AT2G22570	AT4G29380	AT1G76510	AT3G32226	AT4G17900		AT1G60940	AT2G22300
	AT5G56190										AT3G29035	AT4G02330			AT2G41420	AT5G53902	AT2G33150	AT5G35590	AT2G22660	AT4G29560	AT1G76580	AT3G33151	AT4G31550		AT1G60989	AT2G22480
	AT5G57060										AT3G29130	AT4G02390			AT2G41430	AT5G54075	AT2G33170	AT5G35910	AT2G22690	AT4G29735	AT1G76590	AT3G33225	AT2G42790		AT1G61140	AT2G22570
	AT5G57340										AT3G29170	AT4G02500			AT2G41490	AT5G54500	AT2G33390	AT5G37740	AT2G22880	AT4G29750	AT1G76700	AT3G42719	AT1G16150		AT1G61150	AT2G22630
	AT5G57480										AT3G29240	AT4G02540			AT2G41530	AT5G55100	AT2G33470	AT5G38630	AT2G23170	AT4G30090	AT1G76850	AT3G42790	AT1G14540		AT1G61170	AT2G22660
	AT5G57550										AT3G29320	AT4G02640			AT2G41560	AT5G56180	AT2G33490	AT5G38710	AT2G23200	AT4G30150	AT1G76920	AT3G43520	AT4G32870		AT1G61180	AT2G22680
	AT5G58005										AT3G29360	AT4G02730			AT2G41710	AT5G56230	AT2G33580	AT5G38895	AT2G23310	AT4G30410	AT1G76940	AT3G43670	AT4G17070		AT1G61250	AT2G22860
	AT5G58060										AT3G29370	AT4G02880			AT2G41835	AT5G56550	AT2G33630	AT5G39450	AT2G23320	AT4G30640	AT1G76960	AT3G43828	AT3G09490		AT1G61255	AT2G23110
	AT5G58375										AT3G30775	AT4G03115			AT2G42160	AT5G56870	AT2G33710	AT5G39600	AT2G23330	AT4G30810	AT1G76970	AT3G44200	AT5G19140		AT1G61260	AT2G23290
	AT5G58640										AT3G33225	AT4G03140			AT2G42670	AT5G57020	AT2G33830	AT5G39950	AT2G23450	AT4G30870	AT1G76980	AT3G44670	AT1G45145		AT1G61360	AT2G23310
	AT5G58700										AT3G42050	AT4G03510			AT2G42790	AT5G57190	AT2G34250	AT5G40170	AT2G23680	AT4G31050	AT1G77000	AT3G45260	AT3G53810		AT1G61370	AT2G23320
	AT5G58740										AT3G42806	AT4G04020			AT2G43000	AT5G57630	AT2G34470	AT5G40580	AT2G23810	AT4G31230	AT1G77130	AT3G45290	AT5G59420		AT1G61380	AT2G23450
	AT5G59550										AT3G43250	AT4G04409			AT2G43210	AT5G57700	AT2G34690	AT5G40660	AT2G24160	AT4G31240	AT1G77210	AT3G45300	AT1G49032		AT1G61420	AT2G23490
	AT5G59580										AT3G43850	AT4G04790			AT2G43350	AT5G57710	AT2G35060	AT5G40670	AT2G24180	AT4G31420	AT1G77220	AT3G45310	AT5G37740		AT1G61430	AT2G23810
	AT5G59820										AT3G44160	AT4G04970			AT2G43540	AT5G57900	AT2G35070	AT5G40690	AT2G24200	AT4G31510	AT1G77350	AT3G45330	AT3G05120		AT1G61460	AT2G23890
	AT5G60190										AT3G44200	AT4G05050			AT2G43680	AT5G58220	AT2G35240	AT5G40720	AT2G24240	AT4G31810	AT1G77370	AT3G45410	AT3G60690		AT1G61480	AT2G24160
	AT5G60680										AT3G44260	AT4G05070			AT2G43760	AT5G58290	AT2G35930	AT5G40770	AT2G24290	AT4G32060	AT1G77420	AT3G45730	AT4G12570		AT1G61490	AT2G24200
	AT5G60760										AT3G44620	AT4G07950			AT2G43820	AT5G58375	AT2G35980	AT5G40890	AT2G24600	AT4G32180	AT1G77440	AT3G45770	AT5G02150		AT1G61510	AT2G24240
	AT5G60840										AT3G44860	AT4G08330			AT2G43850	AT5G58470	AT2G36220	AT5G41160	AT2G25070	AT4G32680	AT1G77500	AT3G45860	AT4G16960		AT1G61550	AT2G24390
	AT5G61610										AT3G44880	AT4G08350			AT2G43970	AT5G58520	AT2G36320	AT5G41940	AT2G25200	AT4G32870	AT1G77510	AT3G46000	AT1G05340		AT1G61560	AT2G24550
	AT5G61890										AT3G44970	AT4G08540			AT2G44080	AT5G58670	AT2G36330	AT5G42460	AT2G25260	AT4G32950	AT1G77660	AT3G46060	AT5G43440		AT1G61620	AT2G24645
	AT5G62050										AT3G45060	AT4G08690			AT2G44130	AT5G58720	AT2G36360	AT5G42790	AT2G25350	AT4G33510	AT1G77765	AT3G46960	AT2G30250		AT1G61670	AT2G24765
	AT5G62150										AT3G45140	AT4G08860			AT2G44140	AT5G58960	AT2G36400	AT5G42830	AT2G25470	AT4G33990	AT1G77810	AT3G47050	AT1G02170		AT1G61690	AT2G25070
	AT5G62390										AT3G45780	AT4G08900			AT2G44180	AT5G59140	AT2G36420	AT5G42870	AT2G25490	AT4G34030	AT1G77990	AT3G47160	AT5G43930		AT1G61770	AT2G25090
	AT5G62480										AT3G45860	AT4G08920			AT2G44290	AT5G59960	AT2G36430	AT5G42950	AT2G25730	AT4G34460	AT1G78130	AT3G47340	AT1G56460		AT1G61780	AT2G25170
	AT5G63225										AT3G45960	AT4G08950			AT2G44360	AT5G60820	AT2G36470	AT5G43320	AT2G25735	AT4G34570	AT1G78190	AT3G47530	AT3G01050		AT1G61790	AT2G25200
	AT5G63400										AT3G46090	AT4G09000			AT2G44370	AT5G61030	AT2G36580	AT5G43430	AT2G25760	AT4G35020	AT1G78210	AT3G47550	AT4G21120		AT1G61800	AT2G25350
	AT5G63490										AT3G46280	AT4G09140			AT2G44410	AT5G61260	AT2G36670	AT5G43470	AT2G25770	AT4G35220	AT1G78270	AT3G47570	AT4G08555		AT1G61810	AT2G25450
	AT5G63790										AT3G46320	AT4G09320			AT2G44420	AT5G61590	AT2G36680	AT5G43830	AT2G25850	AT4G35750	AT1G78410	AT3G47700	AT4G11470		AT1G61850	AT2G25490
	AT5G63905										AT3G46370	AT4G09560			AT2G44480	AT5G61600	AT2G36690	AT5G43940	AT2G25910	AT4G35780	AT1G78460	AT3G47800	AT4G11900		AT1G62040	AT2G25510
	AT5G64000										AT3G46540	AT4G09760			AT2G44490	AT5G62180	AT2G36770	AT5G44260	AT2G25930	AT4G36050	AT1G78550	AT3G47810	AT1G22870		AT1G62200	AT2G25520
	AT5G64010										AT3G46590	AT4G10000			AT2G44530	AT5G62390	AT2G36900	AT5G44790	AT2G26030	AT4G36120	AT1G78620	AT3G48390	AT3G18860		AT1G62260	AT2G25735
	AT5G64100										AT3G46600	AT4G11150			AT2G44660	AT5G62460	AT2G37130	AT5G45082	AT2G26070	AT4G36210	AT1G78660	AT3G48530	AT1G79380		AT1G62300	AT2G25737
	AT5G64120										AT3G46690	AT4G11230			AT2G45010	AT5G62530	AT2G37430	AT5G45110	AT2G26190	AT4G36280	AT1G78830	AT3G48630	AT4G18880		AT1G62305	AT2G25850
	AT5G64140										AT3G46880	AT4G11360			AT2G45140	AT5G62630	AT2G37520	AT5G45140	AT2G26200	AT4G36450	AT1G78870	AT3G48640	AT1G03400		AT1G62310	AT2G25970
	AT5G64350										AT3G46970	AT4G11960			AT2G45170	AT5G62770	AT2G37678	AT5G45490	AT2G26240	AT4G36470	AT1G78890	AT3G48650	AT2G24240		AT1G62422	AT2G26190
	AT5G64660										AT3G47350	AT4G12080			AT2G45200	AT5G62900	AT2G37940	AT5G45500	AT2G26390	AT4G36490	AT1G78895	AT3G48780	AT5G52210		AT1G62430	AT2G26200
	AT5G64750										AT3G47380	AT4G12250			AT2G45510	AT5G63020	AT2G37950	AT5G45750	AT2G26510	AT4G36520	AT1G78920	AT3G49060	AT4G08330		AT1G62730	AT2G26210
	AT5G64800										AT3G47470	AT4G12470			AT2G45660	AT5G63030	AT2G37980	AT5G46250	AT2G26530	AT4G36670	AT1G79010	AT3G49310	AT1G80420		AT1G62810	AT2G26260
	AT5G65050										AT3G47540	AT4G12570			AT2G45760	AT5G63190	AT2G38000	AT5G46295	AT2G26560	AT4G36790	AT1G79110	AT3G49320	AT1G07160		AT1G62840	AT2G26360
	AT5G65090										AT3G47560	AT4G12650			AT2G45790	AT5G63200	AT2G38290	AT5G46710	AT2G26600	AT4G36970	AT1G79190	AT3G49490	AT4G11850		AT1G63110	AT2G26400
	AT5G65140										AT3G47590	AT4G13250			AT2G45850	AT5G63620	AT2G38410	AT5G46871	AT2G26650	AT4G37180	AT1G79210	AT3G49590	AT1G61490		AT1G63245	AT2G26510
	AT5G65210										AT3G47620	AT4G13830			AT2G45910	AT5G63850	AT2G38470	AT5G46920	AT2G26970	AT4G37190	AT1G79340	AT3G49725	AT4G18205		AT1G63350	AT2G26560
	AT5G65440										AT3G47930	AT4G14230			AT2G45980	AT5G64190	AT2G38790	AT5G47120	AT2G27150	AT4G37260	AT1G79380	AT3G49780	AT2G17520		AT1G63370	AT2G26570
	AT5G66120										AT3G48590	AT4G14270			AT2G46220	AT5G64240	AT2G38860	AT5G47240	AT2G27170	AT4G37440	AT1G79450	AT3G49790	AT5G11000		AT1G63460	AT2G26600
	AT5G66200										AT3G48600	AT4G14340			AT2G46260	AT5G64270	AT2G39100	AT5G47320	AT2G27200	AT4G37480	AT1G79590	AT3G49800	AT3G06850		AT1G63500	AT2G26890
	AT5G66290										AT3G48630	AT4G14500			AT2G46330	AT5G64360	AT2G39200	AT5G47570	AT2G27310	AT4G37900	AT1G79670	AT3G50470	AT2G45140		AT1G63690	AT2G27020
	AT5G66580										AT3G48820	AT4G14520			AT2G46490	AT5G64410	AT2G39210	AT5G47580	AT2G27660	AT4G38440	AT1G79680	AT3G50500	AT5G39020		AT1G63720	AT2G27150
	AT5G66650										AT3G49010	AT4G14570			AT2G46550	AT5G64990	AT2G39400	AT5G48160	AT2G27830	AT4G38470	AT1G79700	AT3G50590	AT3G47570		AT1G63730	AT2G27200
	AT5G66658										AT3G49120	AT4G14880			AT2G46610	AT5G65110	AT2G39480	AT5G48620	AT2G27900	AT4G38932	AT1G79830	AT3G50650	AT3G12100		AT1G63740	AT2G27310
	AT5G67080										AT3G49160	AT4G14905			AT2G46620	AT5G65207	AT2G39550	AT5G48775	AT2G27920	AT4G39090	AT1G79930	AT3G50700	AT5G66490		AT1G63750	AT2G27500
	AT5G67310										AT3G49310	AT4G14930			AT2G46900	AT5G65660	AT2G39660	AT5G49555	AT2G28110	AT4G39550	AT1G79940	AT3G50740	AT2G31350		AT1G63770	AT2G27600
	AT5G67590										AT3G49320	AT4G14990			AT2G46940	AT5G66060	AT2G39920	AT5G49650	AT2G28120	AT4G39910	AT1G80130	AT3G50750	AT3G61210		AT1G63800	AT2G27830
	ATMG00560										AT3G49530	AT4G15140			AT2G47000	AT5G66790	AT2G39960	AT5G49830	AT2G28160	AT4G40020	AT1G80180	AT3G50900	AT1G22500		AT1G63830	AT2G27900
											AT3G49550	AT4G15165			AT2G47130	AT5G66880	AT2G40095	AT5G50375	AT2G28230	AT5G01250	AT1G80230	AT3G50950	AT5G63200		AT1G63860	AT2G27920
											AT3G49620	AT4G15210			AT2G47210	AT5G66930	AT2G40110	AT5G51400	AT2G28360	AT5G01750	AT1G80290	AT3G51010	AT1G05575		AT1G63880	AT2G28110
											AT3G49725	AT4G15520			AT2G47470	AT5G67480	AT2G40140	AT5G51430	AT2G28400	AT5G01980	AT1G80420	AT3G51130	AT5G60620		AT1G64065	AT2G28120
											AT3G49790	AT4G15990			AT2G47640	AT5G67520	AT2G40180	AT5G52240	AT2G28630	AT5G02020	AT1G80460	AT3G51330	AT3G08760		AT1G64170	AT2G28210
											AT3G49940	AT4G16060			AT2G47650	ATMG00150	AT2G40410	AT5G52540	AT2G28660	AT5G02040	AT1G80510	AT3G51340	AT3G07195		AT1G64280	AT2G28630
											AT3G50110	AT4G16144			AT2G47700	ATMG00730	AT2G40420	AT5G52910	AT2G28830	AT5G02150	AT1G80570	AT3G51350	AT5G10780		AT1G64370	AT2G28660
											AT3G50270	AT4G16265			AT2G47730		AT2G40600	AT5G52990	AT2G28840	AT5G02260	AT1G80650	AT3G51360	AT4G36670		AT1G64385	AT2G28760
											AT3G50280	AT4G16444			AT2G47760		AT2G40740	AT5G53160	AT2G28890	AT5G02290	AT1G80890	AT3G51670	AT3G20410		AT1G64400	AT2G28830
											AT3G50430	AT4G16700			AT2G47960		AT2G40810	AT5G53360	AT2G28930	AT5G02810	AT1G80920	AT3G51840	AT5G45750		AT1G64405	AT2G28840
											AT3G50520	AT4G16710			AT2G48020		AT2G40940	AT5G53460	AT2G28940	AT5G03020	AT1G80960	AT3G52180	AT5G04040		AT1G64460	AT2G28890
											AT3G50550	AT4G16892			AT2G48030		AT2G41100	AT5G53550	AT2G29020	AT5G03330	AT2G01010	AT3G52240	AT4G18170		AT1G64470	AT2G28940
											AT3G50770	AT4G16920			AT3G01050		AT2G41410	AT5G54390	AT2G29065	AT5G03455	AT2G01029	AT3G52400	AT4G22305		AT1G64520	AT2G29020
											AT3G50800	AT4G17080			AT3G01080		AT2G41420	AT5G54510	AT2G29070	AT5G04040	AT2G01040	AT3G52430	AT3G47820		AT1G64563	AT2G29080
											AT3G50930	AT4G17245			AT3G01130		AT2G41430	AT5G54900	AT2G29100	AT5G04220	AT2G01060	AT3G52850	AT1G68300		AT1G64570	AT2G29100
											AT3G51010	AT4G17470			AT3G01170		AT2G41490	AT5G55000	AT2G29340	AT5G04235	AT2G01100	AT3G53150	AT5G65207		AT1G64610	AT2G29110
											AT3G51310	AT4G17640			AT3G01290		AT2G41640	AT5G55100	AT2G29400	AT5G04560	AT2G01170	AT3G53270	AT4G23700		AT1G64710	AT2G29340
											AT3G51450	AT4G17660			AT3G01310		AT2G41835	AT5G55940	AT2G29720	AT5G04780	AT2G01180	AT3G53280	AT2G37940		AT1G64750	AT2G29400
											AT3G51600	AT4G18360			AT3G01490		AT2G41880	AT5G56180	AT2G29990	AT5G04895	AT2G01340	AT3G53410	AT2G16870		AT1G64810	AT2G29670
											AT3G51830	AT4G18440			AT3G01590		AT2G42160	AT5G56320	AT2G30140	AT5G05010	AT2G01350	AT3G54010	AT1G22250		AT1G64890	AT2G29940
											AT3G51915	AT4G18465			AT3G01770		AT2G42360	AT5G56350	AT2G30250	AT5G05090	AT2G01410	AT3G54100	AT3G23230		AT1G64990	AT2G30110
											AT3G52070	AT4G18990			AT3G01850		AT2G42390	AT5G56630	AT2G30260	AT5G05100	AT2G01450	AT3G54270	AT5G51400		AT1G65040	AT2G30250
											AT3G52190	AT4G19390			AT3G02070		AT2G42670	AT5G56870	AT2G30440	AT5G05230	AT2G01470	AT3G54440	AT1G07170		AT1G65250	AT2G30395
											AT3G52300	AT4G19865			AT3G02340		AT2G42790	AT5G57020	AT2G30530	AT5G05320	AT2G01540	AT3G54850	AT3G23280		AT1G65270	AT2G30400
											AT3G52420	AT4G20460			AT3G02550		AT2G42890	AT5G57190	AT2G30590	AT5G05750	AT2G01600	AT3G54860	AT5G62560		AT1G65360	AT2G30530
											AT3G52450	AT4G20960			AT3G02700		AT2G43000	AT5G57330	AT2G30620	AT5G05930	AT2G01650	AT3G54880	AT1G64610		AT1G65390	AT2G30590
											AT3G52560	AT4G21510			AT3G02770		AT2G43080	AT5G57580	AT2G30770	AT5G06865	AT2G01670	AT3G55260	AT3G04220		AT1G65481	AT2G30710
											AT3G52630	AT4G21880			AT3G02800		AT2G43160	AT5G57630	AT2G30942	AT5G07010	AT2G01720	AT3G55270	AT1G21000		AT1G65483	AT2G30770
											AT3G52710	AT4G21930			AT3G03150		AT2G43210	AT5G57700	AT2G30945	AT5G07100	AT2G02010	AT3G55450	AT3G11840		AT1G65484	AT2G30970
											AT3G53150	AT4G22310			AT3G03330		AT2G43400	AT5G57780	AT2G31020	AT5G07650	AT2G02040	AT3G55830	AT4G38550		AT1G65486	AT2G31020
											AT3G53370	AT4G22360			AT3G03610		AT2G43620	AT5G58220	AT2G31350	AT5G07660	AT2G02060	AT3G55840	AT5G03320		AT1G65500	AT2G31060
											AT3G53580	AT4G23330			AT3G03640		AT2G43790	AT5G58290	AT2G31510	AT5G07760	AT2G02110	AT3G56050	AT1G21400		AT1G65520	AT2G31350
											AT3G53650	AT4G23680			AT3G03855		AT2G43810	AT5G58640	AT2G31585	AT5G07770	AT2G02180	AT3G56240	AT5G61380		AT1G65540	AT2G31400
											AT3G53870	AT4G23730			AT3G03870		AT2G43820	AT5G58670	AT2G31800	AT5G07780	AT2G02220	AT3G56440	AT4G34270		AT1G65580	AT2G31800
											AT3G54030	AT4G24020			AT3G04181		AT2G43850	AT5G58710	AT2G31810	AT5G07820	AT2G02350	AT3G56690	AT5G46250		AT1G65690	AT2G31870
											AT3G54160	AT4G24060			AT3G04220		AT2G43970	AT5G58720	AT2G31865	AT5G07860	AT2G02360	AT3G56720	AT5G12420		AT1G65720	AT2G31880
											AT3G54270	AT4G24160			AT3G04670		AT2G44080	AT5G59140	AT2G31870	AT5G08120	AT2G02370	AT3G56800	AT5G47070		AT1G65790	AT2G31945
											AT3G54880	AT4G24210			AT3G04720		AT2G44100	AT5G59470	AT2G31880	AT5G08260	AT2G02390	AT3G56880	AT4G23040		AT1G65800	AT2G31970
											AT3G54890	AT4G24275			AT3G04730		AT2G44140	AT5G59613	AT2G31945	AT5G08510	AT2G02400	AT3G57050	AT5G54500		AT1G65820	AT2G32520
											AT3G55440	AT4G24390			AT3G04910		AT2G44180	AT5G59870	AT2G31955	AT5G08580	AT2G02410	AT3G57090	AT2G19160		AT1G65845	AT2G32700
											AT3G55470	AT4G24450			AT3G05010		AT2G44290	AT5G59960	AT2G31990	AT5G09220	AT2G02760	AT3G57240	AT4G12720		AT1G65850	AT2G32730
											AT3G55480	AT4G24800			AT3G05120		AT2G44360	AT5G60160	AT2G32000	AT5G09690	AT2G02810	AT3G57360	AT2G15240		AT1G65970	AT2G32800
											AT3G55560	AT4G24990			AT3G05200		AT2G44370	AT5G60620	AT2G32030	AT5G10560	AT2G02930	AT3G57420	AT3G52400		AT1G65980	AT2G32810
											AT3G55980	AT4G25000			AT3G05230		AT2G44380	AT5G61060	AT2G32080	AT5G10570	AT2G02960	AT3G57480	AT1G64385		AT1G66090	AT2G32885
											AT3G56030	AT4G25200			AT3G05500		AT2G44410	AT5G61070	AT2G32160	AT5G10860	AT2G03120	AT3G57520	AT5G05750		AT1G66160	AT2G32900
											AT3G56460	AT4G25650			AT3G05970		AT2G44420	AT5G61260	AT2G32200	AT5G11060	AT2G03330	AT3G57930	AT4G24690		AT1G66240	AT2G33040
											AT3G56740	AT4G25660			AT3G06070		AT2G44490	AT5G61590	AT2G32680	AT5G11280	AT2G03410	AT3G58270	AT1G73655		AT1G66410	AT2G33080
											AT3G56880	AT4G26130			AT3G06110		AT2G44525	AT5G62180	AT2G32700	AT5G11610	AT2G03430	AT3G58600	AT3G09030		AT1G66590	AT2G33120
											AT3G56950	AT4G26160			AT3G06300		AT2G44530	AT5G62290	AT2G32730	AT5G11720	AT2G03450	AT3G58670	AT5G38895		AT1G66600	AT2G33150
											AT3G57030	AT4G26200			AT3G06380		AT2G44610	AT5G62460	AT2G32830	AT5G11910	AT2G03505	AT3G59010	AT2G40180		AT1G66670	AT2G33170
											AT3G57260	AT4G26288			AT3G06450		AT2G44660	AT5G62530	AT2G32900	AT5G11920	AT2G03510	AT3G59090	AT2G29100		AT1G66680	AT2G33175
											AT3G57560	AT4G26555			AT3G06483		AT2G45010	AT5G62630	AT2G33051	AT5G12120	AT2G03530	AT3G59380	AT2G25070		AT1G66700	AT2G33210
											AT3G57650	AT4G26582			AT3G06580		AT2G45140	AT5G62770	AT2G33080	AT5G12350	AT2G03620	AT3G59570	AT4G32285		AT1G66780	AT2G33390
											AT3G57760	AT4G26640			AT3G06850		AT2G45170	AT5G62900	AT2G33120	AT5G12370	AT2G03680	AT3G59810	AT3G09735		AT1G66880	AT2G33630
											AT3G57790	AT4G27040			AT3G07195		AT2G45200	AT5G63030	AT2G33150	AT5G12420	AT2G03760	AT3G59820	AT1G22570		AT1G66900	AT2G33730
											AT3G57870	AT4G27060			AT3G07280		AT2G45240	AT5G63190	AT2G33170	AT5G12940	AT2G04050	AT3G60160	AT4G16950		AT1G66910	AT2G33990
											AT3G57890	AT4G27410			AT3G07350		AT2G45510	AT5G63200	AT2G33290	AT5G13010	AT2G04070	AT3G60190	AT4G23460		AT1G66920	AT2G34470
											AT3G58120	AT4G27480			AT3G07580		AT2G45660	AT5G63610	AT2G33470	AT5G13210	AT2G04305	AT3G60260	AT1G80460		AT1G66960	AT2G34690
											AT3G58580	AT4G27710			AT3G07680		AT2G45790	AT5G63620	AT2G33510	AT5G13570	AT2G04400	AT3G60300	AT1G73200		AT1G66970	AT2G34940
											AT3G58640	AT4G27760			AT3G07690		AT2G45910	AT5G63680	AT2G33630	AT5G14200	AT2G04430	AT3G60450	AT4G09570		AT1G67000	AT2G35010
											AT3G58900	AT4G28240			AT3G07800		AT2G45980	AT5G63840	AT2G33710	AT5G14240	AT2G04495	AT3G60470	AT3G08710		AT1G67060	AT2G35020
											AT3G59080	AT4G28260			AT3G08550		AT2G46000	AT5G63850	AT2G33740	AT5G14490	AT2G04515	AT3G60580	AT1G75380		AT1G67190	AT2G35050
											AT3G59540	AT4G28300			AT3G08650		AT2G46220	AT5G63970	AT2G33830	AT5G14580	AT2G04620	AT3G60600	AT2G20960		AT1G67250	AT2G35070
											AT3G59810	AT4G28350			AT3G08710		AT2G46260	AT5G64190	AT2G34470	AT5G14590	AT2G04650	AT3G60740	AT3G21630		AT1G67265	AT2G35110
											AT3G59840	AT4G28910			AT3G08760		AT2G46270	AT5G64240	AT2G34690	AT5G14940	AT2G04690	AT3G60820	AT2G19790		AT1G67310	AT2G35240
											AT3G59880	AT4G29230			AT3G08780		AT2G46330	AT5G64260	AT2G34940	AT5G15020	AT2G04860	AT3G60860	AT5G54720		AT1G67490	AT2G35320
											AT3G59900	AT4G29310			AT3G08890		AT2G46400	AT5G64270	AT2G35060	AT5G15860	AT2G04900	AT3G61010	AT4G29210		AT1G67510	AT2G35520
											AT3G59940	AT4G29480			AT3G09000		AT2G46430	AT5G64360	AT2G35320	AT5G16060	AT2G05240	AT3G61060	AT2G40740		AT1G67520	AT2G35590
											AT3G59950	AT4G29530			AT3G09020		AT2G46490	AT5G64410	AT2G35590	AT5G16070	AT2G05260	AT3G61180	AT2G22300		AT1G67550	AT2G35680
											AT3G60070	AT4G29700			AT3G09030		AT2G46500	AT5G64430	AT2G35680	AT5G16120	AT2G05320	AT3G61198	AT2G15960		AT1G67560	AT2G35690
											AT3G60180	AT4G29890			AT3G09490		AT2G46550	AT5G64500	AT2G35690	AT5G16370	AT2G05380	AT3G61200	AT2G17200		AT1G67800	AT2G35790
											AT3G60340	AT4G30010			AT3G09735		AT2G46600	AT5G64760	AT2G35810	AT5G16550	AT2G05518	AT3G61630	AT1G33720		AT1G67810	AT2G35980
											AT3G60370	AT4G30080			AT3G09740		AT2G46620	AT5G65110	AT2G35930	AT5G16780	AT2G05520	AT3G61710	AT3G57550		AT1G67850	AT2G36060
											AT3G60480	AT4G30510			AT3G09830		AT2G46900	AT5G65440	AT2G35980	AT5G16800	AT2G05630	AT3G61790	AT3G50210		AT1G67860	AT2G36080
											AT3G60740	AT4G30790			AT3G09840		AT2G46940	AT5G65950	AT2G36060	AT5G16880	AT2G05840	AT3G62240	AT5G23575		AT1G67910	AT2G36170
											AT3G60966	AT4G30935			AT3G10010		AT2G47000	AT5G66690	AT2G36220	AT5G16900	AT2G06025	AT3G62290	AT5G56960		AT1G67920	AT2G36240
											AT3G61050	AT4G31130			AT3G10120		AT2G47130	AT5G66860	AT2G36310	AT5G17125	AT2G06340	AT3G62360	AT3G17020		AT1G67970	AT2G36310
											AT3G61060	AT4G31398			AT3G10250		AT2G47140	AT5G66880	AT2G36320	AT5G17270	AT2G06490	AT3G62370	AT3G13450		AT1G67980	AT2G36320
											AT3G61180	AT4G31410			AT3G10500		AT2G47190	AT5G66930	AT2G36330	AT5G17690	AT2G07180	AT3G62455	AT5G04560		AT1G68000	AT2G36420
											AT3G61190	AT4G31430			AT3G10640		AT2G47210	AT5G67590	AT2G36360	AT5G17880	AT2G07240	AT3G62550	AT3G09840		AT1G68100	AT2G36580
											AT3G61200	AT4G31650			AT3G10740		AT2G47390		AT2G36400	AT5G18170	AT2G07340	AT3G62780	AT1G33970		AT1G68110	AT2G36680
											AT3G61390	AT4G31950			AT3G10770		AT2G47470		AT2G36420	AT5G18210	AT2G07360	AT3G63080	AT1G30755		AT1G68190	AT2G36900
											AT3G61470	AT4G31970			AT3G10915		AT2G47640		AT2G36470	AT5G18360	AT2G07715	AT3G66654	AT1G53320		AT1G68300	AT2G37130
											AT3G61570	AT4G32130			AT3G10985		AT2G47650		AT2G36500	AT5G18370	AT2G11520	AT4G00300	AT4G34390		AT1G68330	AT2G37160
											AT3G61960	AT4G32280			AT3G11010		AT2G47730		AT2G36670	AT5G18640	AT2G11670	AT4G00355	AT3G52430		AT1G68650	AT2G37320
											AT3G62010	AT4G32360			AT3G11030		AT2G47760		AT2G36680	AT5G18780	AT2G12490	AT4G00750	AT3G57330		AT1G68690	AT2G37460
											AT3G62090	AT4G32440			AT3G11080		AT2G48030		AT2G36690	AT5G18840	AT2G12550	AT4G00780	AT5G04220		AT1G68710	AT2G37520
											AT3G62220	AT4G32480			AT3G11230		AT3G01050		AT2G36770	AT5G19140	AT2G13170	AT4G00800	AT5G40580		AT1G68765	AT2G37550
											AT3G62450	AT4G32960			AT3G11270		AT3G01080		AT2G36900	AT5G19350	AT2G13450	AT4G00960	AT5G10695		AT1G68820	AT2G37678
											AT3G62530	AT4G32980			AT3G11320		AT3G01170		AT2G37130	AT5G19530	AT2G13460	AT4G01210	AT5G05320		AT1G68840	AT2G37690
											AT3G62580	AT4G33210			AT3G11340		AT3G01290		AT2G37150	AT5G19690	AT2G13560	AT4G01480	AT5G02780		AT1G69030	AT2G37840
											AT3G62630	AT4G33650			AT3G11820		AT3G01770		AT2G37200	AT5G20030	AT2G13650	AT4G01610	AT4G39090		AT1G69270	AT2G37920
											AT3G62920	AT4G33940			AT3G11840		AT3G01830		AT2G37430	AT5G20500	AT2G13790	AT4G01740	AT3G11820		AT1G69360	AT2G37950
											AT3G63210	AT4G34310			AT3G11850		AT3G01850		AT2G37470	AT5G20660	AT2G13800	AT4G01910	AT2G42160		AT1G69450	AT2G38000
											AT3G63250	AT4G34660			AT3G11910		AT3G02070		AT2G37520	AT5G21970	AT2G13810	AT4G01920	AT4G19880		AT1G69460	AT2G38410
											AT3G63290	AT4G34840			AT3G12040		AT3G02090		AT2G37678	AT5G22000	AT2G14080	AT4G01940	AT1G61690		AT1G69520	AT2G38790
											AT3G63440	AT4G35140			AT3G12100		AT3G02340		AT2G37820	AT5G22270	AT2G14120	AT4G02030	AT1G17290		AT1G69550	AT2G38820
											AT4G00026	AT4G35160			AT3G12290		AT3G02360		AT2G37840	AT5G22360	AT2G14170	AT4G02050	AT3G48090		AT1G69720	AT2G39050
											AT4G00420	AT4G35440			AT3G12360		AT3G02550		AT2G37940	AT5G22450	AT2G14255	AT4G02230	AT1G47890		AT1G69740	AT2G39100
											AT4G00700	AT4G35480			AT3G12490		AT3G02700		AT2G37950	AT5G22510	AT2G14410	AT4G02330	AT5G54540		AT1G69780	AT2G39230
											AT4G01026	AT4G35850			AT3G12520		AT3G02770		AT2G37980	AT5G23240	AT2G14560	AT4G02340	AT5G37070		AT1G69810	AT2G39280
											AT4G01130	AT4G35880			AT3G12570		AT3G02800		AT2G38000	AT5G23570	AT2G14610	AT4G02350	AT1G53165		AT1G69840	AT2G39350
											AT4G01200	AT4G36032			AT3G12650		AT3G02840		AT2G38020	AT5G23660	AT2G14680	AT4G02370	AT1G26420		AT1G69850	AT2G39400
											AT4G01320	AT4G36050			AT3G12740		AT3G03020		AT2G38290	AT5G23670	AT2G14720	AT4G02480	AT4G11000		AT1G69890	AT2G39460
											AT4G01400	AT4G36290			AT3G12910		AT3G03330		AT2G38400	AT5G23880	AT2G14740	AT4G02550	AT4G01750		AT1G69900	AT2G39480
											AT4G01897	AT4G36800			AT3G13050		AT3G03490		AT2G38410	AT5G23980	AT2G14835	AT4G02570	AT4G36480		AT1G69910	AT2G39660
											AT4G01900	AT4G37440			AT3G13062		AT3G03570		AT2G38470	AT5G23990	AT2G14878	AT4G02880	AT4G25720		AT1G70100	AT2G39920
											AT4G01920	AT4G37610			AT3G13235		AT3G03610		AT2G38860	AT5G24260	AT2G15040	AT4G02930	AT5G19230		AT1G70140	AT2G40000
											AT4G02080	AT4G37690			AT3G13330		AT3G03855		AT2G38960	AT5G25050	AT2G15042	AT4G03030	AT4G04740		AT1G70150	AT2G40110
											AT4G02200	AT4G37770			AT3G13380		AT3G03870		AT2G39000	AT5G25180	AT2G15230	AT4G03080	AT5G13570		AT1G70160	AT2G40140
											AT4G02330	AT4G37880			AT3G13430		AT3G04181		AT2G39030	AT5G25210	AT2G15240	AT4G03510	AT1G12780		AT1G70290	AT2G40410
											AT4G02410	AT4G37990			AT3G13450		AT3G04210		AT2G39050	AT5G25265	AT2G15390	AT4G03530	AT4G02550		AT1G70300	AT2G40435
											AT4G02500	AT4G38230			AT3G13550		AT3G04220		AT2G39100	AT5G25270	AT2G15480	AT4G03560	AT2G32700		AT1G70330	AT2G40520
											AT4G02610	AT4G38390			AT3G13610		AT3G04480		AT2G39210	AT5G25900	AT2G15555	AT4G04105	AT3G10740		AT1G70420	AT2G40600
											AT4G02930	AT4G38495			AT3G13910		AT3G04580		AT2G39260	AT5G26760	AT2G15570	AT4G04110	AT5G55420		AT1G70518	AT2G40610
											AT4G02970	AT4G38600			AT3G13950		AT3G04670		AT2G39350	AT5G26860	AT2G15790	AT4G04220	AT3G04181		AT1G70520	AT2G40650
											AT4G03190	AT4G38825			AT3G14050		AT3G04717		AT2G39360	AT5G27430	AT2G15860	AT4G04280	AT5G11720		AT1G70530	AT2G40810
											AT4G03320	AT4G38900			AT3G14090		AT3G04720		AT2G39400	AT5G27840	AT2G15880	AT4G04560	AT1G22620		AT1G70581	AT2G40840
											AT4G03410	AT4G38932			AT3G14290		AT3G04740		AT2G39480	AT5G27920	AT2G15890	AT4G04695	AT3G57480		AT1G70590	AT2G41250
											AT4G03600	AT4G38940			AT3G14310		AT3G04910		AT2G39550	AT5G27950	AT2G15900	AT4G04710	AT2G33080		AT1G70620	AT2G41430
											AT4G04020	AT4G39140			AT3G14460		AT3G05010		AT2G39630	AT5G28926	AT2G15960	AT4G04720	AT1G13450		AT1G70690	AT2G41470
											AT4G04180	AT4G39170			AT3G14470		AT3G05120		AT2G39660	AT5G32103	AT2G16000	AT4G04790	AT3G11850		AT1G70740	AT2G41530
											AT4G04330	AT4G39660			AT3G14620		AT3G05200		AT2G40095	AT5G32136	AT2G16310	AT4G04972	AT1G26410		AT1G70820	AT2G41710
											AT4G04340	AT4G39910			AT3G14840		AT3G05230		AT2G40110	AT5G32825	AT2G16405	AT4G05060	AT4G38932		AT1G70980	AT2G41730
											AT4G04370	AT4G39925			AT3G15040		AT3G05250		AT2G40113	AT5G35690	AT2G16530	AT4G05070	AT1G19020		AT1G71040	AT2G41750
											AT4G04409	AT4G40080			AT3G15070		AT3G05580		AT2G40140	AT5G37740	AT2G16595	AT4G05150	AT1G61250		AT1G71080	AT2G42160
											AT4G04490	AT5G01430			AT3G15355		AT3G05650		AT2G40180	AT5G37830	AT2G16600	AT4G05530	AT5G52800		AT1G71140	AT2G42400
											AT4G04620	AT5G01490			AT3G15356		AT3G05710		AT2G40410	AT5G38280	AT2G16640	AT4G05540	AT1G76940		AT1G71190	AT2G42670
											AT4G04745	AT5G01600			AT3G15358		AT3G05970		AT2G40420	AT5G38710	AT2G16670	AT4G06558	AT1G16130		AT1G71220	AT2G42790
											AT4G04780	AT5G02220			AT3G15450		AT3G06210		AT2G40600	AT5G38860	AT2G16710	AT4G06588	AT3G13330		AT1G71390	AT2G43090
											AT4G04955	AT5G02260			AT3G15500		AT3G06300		AT2G40620	AT5G38880	AT2G16870	AT4G07850	AT1G61360		AT1G71400	AT2G43160
											AT4G04970	AT5G02580			AT3G15518		AT3G06380		AT2G40740	AT5G38895	AT2G16930	AT4G08290	AT1G75140		AT1G71410	AT2G43210
											AT4G05030	AT5G03030			AT3G15580		AT3G06440		AT2G40935	AT5G39450	AT2G17040	AT4G08480	AT1G49300		AT1G71520	AT2G43540
											AT4G08230	AT5G03200			AT3G15630		AT3G06450		AT2G40940	AT5G39770	AT2G17110	AT4G08600	AT2G15390		AT1G71697	AT2G43590
											AT4G08290	AT5G03230			AT3G15760		AT3G06483		AT2G41100	AT5G39800	AT2G17120	AT4G08750	AT2G04690		AT1G71800	AT2G43620
											AT4G08920	AT5G03240			AT3G15770		AT3G06500		AT2G41220	AT5G40230	AT2G17130	AT4G08810	AT5G42440		AT1G71820	AT2G43780
											AT4G09000	AT5G03350			AT3G15930		AT3G06580		AT2G41420	AT5G40280	AT2G17200	AT4G08850	AT3G18930		AT1G71865	AT2G43820
											AT4G09560	AT5G03360			AT3G16030		AT3G06850		AT2G41430	AT5G40660	AT2G17220	AT4G08860	AT5G45510		AT1G71880	AT2G43850
											AT4G09760	AT5G03390			AT3G16565		AT3G07010		AT2G41440	AT5G40690	AT2G17290	AT4G09300	AT5G66250		AT1G71910	AT2G43970
											AT4G09800	AT5G03420			AT3G16700		AT3G07040		AT2G41470	AT5G40720	AT2G17380	AT4G09425	AT4G15236		AT1G71950	AT2G44060
											AT4G10000	AT5G04090			AT3G16720		AT3G07195		AT2G41530	AT5G40840	AT2G17420	AT4G10000	AT3G24900		AT1G71970	AT2G44130
											AT4G10050	AT5G04190			AT3G16740		AT3G07220		AT2G41640	AT5G40890	AT2G17440	AT4G10500	AT5G18480		AT1G71980	AT2G44140
											AT4G10140	AT5G04230			AT3G16785		AT3G07580		AT2G41710	AT5G40900	AT2G17450	AT4G10730	AT1G73380		AT1G72000	AT2G44180
											AT4G10330	AT5G04290			AT3G16990		AT3G07680		AT2G41730	AT5G41160	AT2G17520	AT4G10840	AT1G04750		AT1G72010	AT2G44240
											AT4G10340	AT5G04480			AT3G17000		AT3G07690		AT2G41835	AT5G41210	AT2G17560	AT4G10930	AT5G03330		AT1G72060	AT2G44370
											AT4G10500	AT5G04490			AT3G17020		AT3G07780		AT2G41880	AT5G41761	AT2G17570	AT4G10980	AT5G57190		AT1G72070	AT2G44380
											AT4G10695	AT5G04590			AT3G17100		AT3G07790		AT2G42160	AT5G42440	AT2G17705	AT4G10990	AT4G29050		AT1G72160	AT2G44410
											AT4G10840	AT5G04760			AT3G17410		AT3G07800		AT2G42280	AT5G42460	AT2G17720	AT4G11260	AT4G14610		AT1G72280	AT2G44480
											AT4G10860	AT5G05080			AT3G17420		AT3G08650		AT2G42400	AT5G42540	AT2G17730	AT4G11270	AT5G39950		AT1G72330	AT2G44530
											AT4G10920	AT5G05310			AT3G17700		AT3G08710		AT2G42670	AT5G42560	AT2G17740	AT4G11300	AT2G15890		AT1G72416	AT2G44660
											AT4G10940	AT5G05440			AT3G17850		AT3G08720		AT2G42790	AT5G42820	AT2G17760	AT4G11470	AT3G07580		AT1G72540	AT2G44760
											AT4G11280	AT5G05610			AT3G17940		AT3G08760		AT2G42890	AT5G42830	AT2G17790	AT4G11840	AT1G10070		AT1G72630	AT2G44910
											AT4G11360	AT5G05660			AT3G18035		AT3G08780		AT2G43000	AT5G42870	AT2G17920	AT4G11860	AT2G44180		AT1G72680	AT2G45010
											AT4G11460	AT5G05850			AT3G18080		AT3G09010		AT2G43060	AT5G43320	AT2G17975	AT4G11890	AT2G40940		AT1G72710	AT2G45030
											AT4G11655	AT5G05930			AT3G18250		AT3G09020		AT2G43160	AT5G43440	AT2G17980	AT4G11900	AT5G50430		AT1G72830	AT2G45170
											AT4G12230	AT5G06370			AT3G18350		AT3G09030		AT2G43210	AT5G43470	AT2G18000	AT4G12010	AT3G51430		AT1G72852	AT2G45200
											AT4G12300	AT5G06780			AT3G18370		AT3G09040		AT2G43400	AT5G43710	AT2G18170	AT4G12020	AT2G23450		AT1G72855	AT2G45240
											AT4G12470	AT5G06870			AT3G18690		AT3G09470		AT2G43540	AT5G43830	AT2G18280	AT4G12120	AT5G04170		AT1G72860	AT2G45510
											AT4G12480	AT5G07000			AT3G18830		AT3G09490		AT2G43590	AT5G43940	AT2G18350	AT4G12570	AT1G13990		AT1G72900	AT2G45590
											AT4G12650	AT5G07250			AT3G18860		AT3G09735		AT2G43620	AT5G44230	AT2G18660	AT4G12590	AT2G46260		AT1G72950	AT2G45620
											AT4G12735	AT5G07322			AT3G18930		AT3G09740		AT2G43680	AT5G44572	AT2G18670	AT4G12735	AT2G11520		AT1G73030	AT2G45630
											AT4G12900	AT5G07460			AT3G19010		AT3G09810		AT2G43790	AT5G44730	AT2G18690	AT4G13030	AT2G40140		AT1G73200	AT2G45660
											AT4G13250	AT5G07680			AT3G19190		AT3G09830		AT2G43850	AT5G44790	AT2G18750	AT4G13250	AT4G10610		AT1G73250	AT2G45790
											AT4G13360	AT5G07810			AT3G19260		AT3G09840		AT2G43970	AT5G45000	AT2G18770	AT4G13430	AT3G60420		AT1G73380	AT2G45810
											AT4G13395	AT5G07870			AT3G19460		AT3G10010		AT2G44140	AT5G45140	AT2G18840	AT4G13820	AT5G52540		AT1G73500	AT2G45910
											AT4G13430	AT5G07890			AT3G19540		AT3G10120		AT2G44180	AT5G45340	AT2G19110	AT4G13890	AT4G14365		AT1G73655	AT2G45980
											AT4G13820	AT5G07940			AT3G19553		AT3G10250		AT2G44370	AT5G45490	AT2G19130	AT4G14070	AT1G30540		AT1G73680	AT2G46180
											AT4G14070	AT5G08060			AT3G19860		AT3G10500		AT2G44420	AT5G45500	AT2G19160	AT4G14270	AT1G65850		AT1G73805	AT2G46220
											AT4G14230	AT5G08170			AT3G19910		AT3G10640		AT2G44480	AT5G45605	AT2G19180	AT4G14500	AT1G77220		AT1G73810	AT2G46260
											AT4G14320	AT5G08190			AT3G19930		AT3G10720		AT2G44490	AT5G45750	AT2G19190	AT4G14610	AT1G19660		AT1G73980	AT2G46330
											AT4G14370	AT5G08520			AT3G20250		AT3G10740		AT2G44730	AT5G45990	AT2G19250	AT4G14716	AT4G16480		AT1G74080	AT2G46490
											AT4G14450	AT5G08580			AT3G20395		AT3G10915		AT2G44850	AT5G46150	AT2G19350	AT4G14746	AT1G74440		AT1G74088	AT2G46550
											AT4G14500	AT5G08590			AT3G20410		AT3G10985		AT2G44890	AT5G46710	AT2G19470	AT4G14800	AT4G26550		AT1G74100	AT2G46620
											AT4G14560	AT5G08670			AT3G20420		AT3G11010		AT2G44995	AT5G46871	AT2G19710	AT4G14880	AT5G25910		AT1G74170	AT2G46640
											AT4G14600	AT5G09300			AT3G20510		AT3G11040		AT2G45010	AT5G47090	AT2G19740	AT4G15070	AT3G19260		AT1G74210	AT2G46900
											AT4G14880	AT5G09410			AT3G20660		AT3G11080		AT2G45140	AT5G47250	AT2G19790	AT4G15260	AT1G03370		AT1G74230	AT2G47320
											AT4G14930	AT5G09620			AT3G20670		AT3G11230		AT2G45170	AT5G47260	AT2G19810	AT4G15760	AT5G35735		AT1G74280	AT2G47390
											AT4G14960	AT5G09630			AT3G20770		AT3G11270		AT2G45200	AT5G48020	AT2G19950	AT4G15990	AT1G59580		AT1G74300	AT2G47470
											AT4G15010	AT5G09740			AT3G20920		AT3G11320		AT2G45330	AT5G48160	AT2G20010	AT4G16000	AT3G45040		AT1G74330	AT2G47600
											AT4G15140	AT5G09920			AT3G21080		AT3G11402		AT2G45360	AT5G48620	AT2G20110	AT4G16008	AT4G23810		AT1G74340	AT2G47680
											AT4G15475	AT5G10400			AT3G21420		AT3G11460		AT2G45500	AT5G48775	AT2G20142	AT4G16130	AT4G22330		AT1G74350	AT2G47690
											AT4G15520	AT5G10440			AT3G21520		AT3G11530		AT2G45510	AT5G49390	AT2G20320	AT4G16180	AT5G05460		AT1G74360	AT2G47700
											AT4G15560	AT5G10745			AT3G21630		AT3G11540		AT2G45660	AT5G49400	AT2G20390	AT4G16190	AT3G11230		AT1G74440	AT2G47760
											AT4G15760	AT5G10900			AT3G21640		AT3G11650		AT2G45910	AT5G49555	AT2G20420	AT4G16520	AT4G00355		AT1G74590	AT2G48030
											AT4G16060	AT5G10910			AT3G21780		AT3G11770		AT2G45980	AT5G49650	AT2G20530	AT4G16780	AT4G08480		AT1G74650	AT3G01080
											AT4G16150	AT5G10980			AT3G21781		AT3G11820		AT2G46150	AT5G50160	AT2G20630	AT4G16890	AT1G67520		AT1G74680	AT3G01175
											AT4G16260	AT5G11800			AT3G22060		AT3G11840		AT2G46220	AT5G50375	AT2G20740	AT4G16960	AT2G23310		AT1G74710	AT3G01280
											AT4G16444	AT5G11840			AT3G22190		AT3G11850		AT2G46240	AT5G50920	AT2G20760	AT4G16990	AT5G22270		AT1G74790	AT3G01290
											AT4G16500	AT5G12020			AT3G22460		AT3G11880		AT2G46260	AT5G51380	AT2G20770	AT4G17070	AT1G78550		AT1G74910	AT3G01310
											AT4G16515	AT5G12230			AT3G22600		AT3G11890		AT2G46330	AT5G51400	AT2G20780	AT4G17486	AT1G09195		AT1G75040	AT3G01770
											AT4G16695	AT5G13200			AT3G23010		AT3G11910		AT2G46490	AT5G52120	AT2G20790	AT4G17660	AT5G16820		AT1G75130	AT3G01850
											AT4G16860	AT5G13220			AT3G23230		AT3G11930		AT2G46560	AT5G52300	AT2G20930	AT4G17830	AT2G43970		AT1G75140	AT3G02090
											AT4G16890	AT5G13390			AT3G23280		AT3G12040		AT2G46610	AT5G52540	AT2G20960	AT4G17900	AT1G78410		AT1G75190	AT3G02150
											AT4G16892	AT5G13590			AT3G23480		AT3G12100		AT2G46620	AT5G52910	AT2G21230	AT4G18170	AT1G24150		AT1G75220	AT3G02170
											AT4G17010	AT5G13610			AT3G23550		AT3G12220		AT2G46900	AT5G52990	AT2G21240	AT4G18340	AT3G55450		AT1G75250	AT3G02340
											AT4G17100	AT5G13960			AT3G24090		AT3G12290		AT2G46940	AT5G53160	AT2G21350	AT4G18880	AT4G10970		AT1G75380	AT3G02520
											AT4G17430	AT5G14360			AT3G24900		AT3G12360		AT2G47130	AT5G53460	AT2G21410	AT4G18890	AT3G21781		AT1G75440	AT3G02530
											AT4G17490	AT5G14430			AT3G25010		AT3G12490		AT2G47140	AT5G53550	AT2G21500	AT4G18930	AT1G53110		AT1G75490	AT3G02550
											AT4G17510	AT5G14540			AT3G25020		AT3G12520		AT2G47190	AT5G54080	AT2G21520	AT4G18990	AT5G39670		AT1G75510	AT3G02610
											AT4G18210	AT5G15940			AT3G25070		AT3G12570		AT2G47390	AT5G54510	AT2G21620	AT4G19160	AT3G16740		AT1G75580	AT3G02630
											AT4G18230	AT5G15980			AT3G25610		AT3G12630		AT2G47650	AT5G55000	AT2G21660	AT4G19180	AT5G62770		AT1G75630	AT3G02650
											AT4G18340	AT5G16150			AT3G26020		AT3G12740		AT2G47680	AT5G55100	AT2G21850	AT4G19200	AT1G66700		AT1G75800	AT3G02770
											AT4G18400	AT5G16180			AT3G26090		AT3G12760		AT2G47760	AT5G55160	AT2G21870	AT4G19420	AT1G06130		AT1G75830	AT3G03020
											AT4G18440	AT5G16210			AT3G26165		AT3G12910		AT2G48110	AT5G55420	AT2G21900	AT4G19660	AT5G57020		AT1G75850	AT3G03160
											AT4G18890	AT5G16260			AT3G26180		AT3G13050		AT3G01050	AT5G55700	AT2G21950	AT4G19840	AT3G54790		AT1G76040	AT3G03180
											AT4G18930	AT5G16280			AT3G26200		AT3G13062		AT3G01080	AT5G56180	AT2G22010	AT4G19860	AT1G49130		AT1G76150	AT3G03330
											AT4G18975	AT5G16320			AT3G26210		AT3G13080		AT3G01150	AT5G56260	AT2G22122	AT4G19870	AT5G61560		AT1G76185	AT3G03490
											AT4G19160	AT5G16480			AT3G26220		AT3G13100		AT3G01175	AT5G56550	AT2G22300	AT4G19970	AT5G18490		AT1G76200	AT3G03750
											AT4G19170	AT5G16550			AT3G26230		AT3G13200		AT3G01290	AT5G56795	AT2G22310	AT4G19990	AT4G26060		AT1G76410	AT3G03870
											AT4G19180	AT5G16570			AT3G26340		AT3G13235		AT3G01300	AT5G56870	AT2G22425	AT4G20410	AT2G26510		AT1G76510	AT3G03950
											AT4G19200	AT5G16660			AT3G26500		AT3G13330		AT3G01310	AT5G57190	AT2G22480	AT4G21120	AT5G48380		AT1G76580	AT3G03990
											AT4G19660	AT5G16690			AT3G26510		AT3G13380		AT3G01750	AT5G57330	AT2G22500	AT4G21360	AT4G17250		AT1G76590	AT3G04090
											AT4G19810	AT5G17250			AT3G26600		AT3G13430		AT3G01830	AT5G57630	AT2G22660	AT4G21450	AT1G35230		AT1G76600	AT3G04240
											AT4G19865	AT5G17390			AT3G26740		AT3G13433		AT3G01850	AT5G57655	AT2G22830	AT4G21534	AT4G36790		AT1G76680	AT3G04290
											AT4G19890	AT5G17890			AT3G26830		AT3G13437		AT3G01910	AT5G57700	AT2G22910	AT4G21560	AT3G25070		AT1G76700	AT3G04600
											AT4G19900	AT5G18080			AT3G26890		AT3G13450		AT3G01970	AT5G58575	AT2G23170	AT4G21800	AT3G61070		AT1G76850	AT3G04670
											AT4G20030	AT5G18110			AT3G26910		AT3G13550		AT3G02040	AT5G58710	AT2G23200	AT4G21810	AT5G54860		AT1G76860	AT3G04910
											AT4G20140	AT5G18140			AT3G27530		AT3G13790		AT3G02065	AT5G58720	AT2G23310	AT4G21926	AT5G16110		AT1G76920	AT3G04930
											AT4G20320	AT5G18230			AT3G27560		AT3G13910		AT3G02070	AT5G58730	AT2G23320	AT4G21960	AT5G22530		AT1G76940	AT3G05000
											AT4G20380	AT5G18290			AT3G27610		AT3G14050		AT3G02340	AT5G59150	AT2G23330	AT4G22540	AT4G15990		AT1G76960	AT3G05010
											AT4G20860	AT5G18590			AT3G28450		AT3G14090		AT3G02360	AT5G59260	AT2G23450	AT4G22670	AT1G67800		AT1G76970	AT3G05090
											AT4G21170	AT5G18630			AT3G28480		AT3G14310		AT3G02520	AT5G59470	AT2G23680	AT4G22980	AT1G11000		AT1G76980	AT3G05120
											AT4G21180	AT5G18650			AT3G28690		AT3G14410		AT3G02550	AT5G59960	AT2G23770	AT4G23040	AT2G14720		AT1G77000	AT3G05200
											AT4G21200	AT5G18661			AT3G28850		AT3G14460		AT3G02630	AT5G60040	AT2G23810	AT4G23140	AT5G25270		AT1G77130	AT3G05230
											AT4G21580	AT5G18800			AT3G28860		AT3G14470		AT3G02770	AT5G60360	AT2G23890	AT4G23180	AT5G10560		AT1G77210	AT3G05530
											AT4G21830	AT5G18840			AT3G28865		AT3G14840		AT3G02840	AT5G60620	AT2G23940	AT4G23220	AT1G70690		AT1G77220	AT3G05650
											AT4G21870	AT5G19000			AT3G29034		AT3G14990		AT3G03000	AT5G60730	AT2G24160	AT4G23230	AT5G43100		AT1G77350	AT3G05680
											AT4G21880	AT5G19010			AT3G29035		AT3G15040		AT3G03020	AT5G61070	AT2G24180	AT4G23260	AT5G51290		AT1G77370	AT3G05710
											AT4G22150	AT5G19080			AT3G29240		AT3G15070		AT3G03180	AT5G61250	AT2G24200	AT4G23450	AT5G51970		AT1G77420	AT3G05830
											AT4G22300	AT5G19120			AT3G29400		AT3G15290		AT3G03310	AT5G61260	AT2G24240	AT4G23460	AT1G03140		AT1G77440	AT3G05970
											AT4G22540	AT5G19130			AT3G29612		AT3G15355		AT3G03470	AT5G61590	AT2G24360	AT4G23470	AT5G36930		AT1G77500	AT3G06050
											AT4G22756	AT5G19160			AT3G29670		AT3G15356		AT3G03610	AT5G61940	AT2G24600	AT4G23610	AT1G49820		AT1G77510	AT3G06060
											AT4G23140	AT5G19200			AT3G29736		AT3G15358		AT3G03855	AT5G62390	AT2G24765	AT4G23700	AT5G37490		AT1G77660	AT3G06170
											AT4G23215	AT5G19300			AT3G29739		AT3G15450		AT3G03870	AT5G62460	AT2G24850	AT4G23810	AT1G59610		AT1G77710	AT3G06210
											AT4G23300	AT5G19310			AT3G30170		AT3G15500		AT3G04070	AT5G62530	AT2G24890	AT4G23880	AT3G16990		AT1G77765	AT3G06380
											AT4G23320	AT5G19530			AT3G30396		AT3G15518		AT3G04181	AT5G62630	AT2G25000	AT4G24040	AT2G28830		AT1G77810	AT3G06420
											AT4G23530	AT5G19670			AT3G30410		AT3G15580		AT3G04220	AT5G62900	AT2G25070	AT4G24230	AT5G08380		AT1G77890	AT3G06440
											AT4G23550	AT5G19920			AT3G30610		AT3G15630		AT3G04640	AT5G63190	AT2G25110	AT4G24400	AT1G21450		AT1G77960	AT3G06450
											AT4G23600	AT5G20170			AT3G30620		AT3G15710		AT3G04670	AT5G63200	AT2G25200	AT4G24520	AT5G24260		AT1G77990	AT3G06470
											AT4G23650	AT5G20620			AT3G30749		AT3G15760		AT3G04720	AT5G63620	AT2G25300	AT4G24550	AT2G29020		AT1G78030	AT3G06500
											AT4G24020	AT5G20650			AT3G30775		AT3G15770		AT3G04910	AT5G63800	AT2G25310	AT4G24680	AT2G33120		AT1G78130	AT3G06580
											AT4G24060	AT5G20830			AT3G30837		AT3G16030		AT3G04930	AT5G63850	AT2G25350	AT4G24690	AT4G26910		AT1G78190	AT3G06620
											AT4G24210	AT5G20900			AT3G30838		AT3G16510		AT3G05000	AT5G63950	AT2G25470	AT4G25110	AT2G26650		AT1G78210	AT3G06850
											AT4G24275	AT5G21070			AT3G33067		AT3G16565		AT3G05120	AT5G64190	AT2G25510	AT4G25350	AT5G03460		AT1G78240	AT3G07010
											AT4G24370	AT5G21170			AT3G33084		AT3G16700		AT3G05160	AT5G64240	AT2G25520	AT4G25515	AT3G03610		AT1G78270	AT3G07060
											AT4G24490	AT5G21940			AT3G33166		AT3G16720		AT3G05200	AT5G64260	AT2G25730	AT4G25650	AT5G57900		AT1G78280	AT3G07180
											AT4G24570	AT5G22310			AT3G42090		AT3G16740		AT3G05250	AT5G64360	AT2G25735	AT4G25720	AT5G61500		AT1G78310	AT3G07390
											AT4G24800	AT5G22400			AT3G42150		AT3G16770		AT3G05530	AT5G64410	AT2G25850	AT4G25835	AT2G30260		AT1G78410	AT3G07480
											AT4G24820	AT5G22794			AT3G42431		AT3G16785		AT3G05580	AT5G64860	AT2G25910	AT4G25870	AT5G03730		AT1G78420	AT3G07520
											AT4G24970	AT5G22850			AT3G42716		AT3G16830		AT3G05675	AT5G64880	AT2G25930	AT4G25880	AT5G01010		AT1G78460	AT3G07568
											AT4G25360	AT5G22920			AT3G42719		AT3G16990		AT3G06170	AT5G65110	AT2G26190	AT4G25940	AT4G01720		AT1G78550	AT3G07570
											AT4G25440	AT5G23000			AT3G42720		AT3G17000		AT3G06210	AT5G65205	AT2G26200	AT4G25970	AT3G19930		AT1G78600	AT3G07580
											AT4G25870	AT5G23090			AT3G42790		AT3G17020		AT3G06380	AT5G65760	AT2G26210	AT4G26060	AT5G23660		AT1G78620	AT3G07610
											AT4G25900	AT5G23240			AT3G43000		AT3G17410		AT3G06440	AT5G65910	AT2G26230	AT4G26070	AT4G16520		AT1G78660	AT3G07680
											AT4G26130	AT5G23320			AT3G43128		AT3G17690		AT3G06450	AT5G66130	AT2G26240	AT4G26130	AT1G15740		AT1G78830	AT3G07780
											AT4G26288	AT5G23550			AT3G43146		AT3G17700		AT3G06455	AT5G66420	AT2G26300	AT4G26160	AT2G02960		AT1G78850	AT3G07790
											AT4G26555	AT5G23610			AT3G43444		AT3G17850		AT3G06470	AT5G66490	AT2G26390	AT4G26260	AT5G04720		AT1G78870	AT3G07800
											AT4G26582	AT5G23670			AT3G43523		AT3G17880		AT3G06483	AT5G66630	AT2G26400	AT4G26270	AT5G07770		AT1G78890	AT3G07870
											AT4G26940	AT5G24160			AT3G43670		AT3G17940		AT3G06500	AT5G66790	AT2G26430	AT4G26400	AT3G57090		AT1G78895	AT3G08550
											AT4G27070	AT5G24270			AT3G43723		AT3G18035		AT3G06580	AT5G66880	AT2G26440	AT4G26620	AT3G48850		AT1G78900	AT3G08610
											AT4G27090	AT5G24290			AT3G43833		AT3G18250		AT3G06850	AT5G66930	AT2G26510	AT4G27010	AT1G11300		AT1G78910	AT3G08650
											AT4G27220	AT5G24400			AT3G43850		AT3G18370		AT3G07010	AT5G66960	AT2G26560	AT4G27450	AT2G17570		AT1G78920	AT3G08760
											AT4G27280	AT5G24520			AT3G44042		AT3G18690		AT3G07040	AT5G67410	AT2G26600	AT4G27470	AT5G38310		AT1G79010	AT3G08780
											AT4G27390	AT5G24670			AT3G44070		AT3G18830		AT3G07080	ATMG00910	AT2G26650	AT4G27740	AT3G19190		AT1G79110	AT3G08850
											AT4G27440	AT5G24800			AT3G44190		AT3G18860		AT3G07100		AT2G26890	AT4G28040	AT4G39640		AT1G79190	AT3G08890
											AT4G27450	AT5G24890			AT3G44326		AT3G18930		AT3G07195		AT2G26970	AT4G28260	AT3G11910		AT1G79210	AT3G09020
											AT4G27690	AT5G25130			AT3G44330		AT3G19010		AT3G07280		AT2G27020	AT4G28270	AT1G70518		AT1G79340	AT3G09030
											AT4G27730	AT5G25190			AT3G44400		AT3G19190		AT3G07525		AT2G27090	AT4G28300	AT3G25020		AT1G79360	AT3G09040
											AT4G27760	AT5G25280			AT3G45040		AT3G19260		AT3G07580		AT2G27150	AT4G28470	AT1G54115		AT1G79380	AT3G09410
											AT4G27860	AT5G25451			AT3G45253		AT3G19520		AT3G07600		AT2G27170	AT4G28490	AT1G80570		AT1G79450	AT3G09480
											AT4G27960	AT5G25790			AT3G45260		AT3G19540		AT3G07690		AT2G27200	AT4G28510	AT1G52780		AT1G79590	AT3G09735
											AT4G28070	AT5G25920			AT3G45270		AT3G19553		AT3G07730		AT2G27310	AT4G28560	AT1G03740		AT1G79670	AT3G09740
											AT4G28240	AT5G26700			AT3G45290		AT3G19860		AT3G07780		AT2G27600	AT4G28652	AT4G23180		AT1G79680	AT3G09840
											AT4G28390	AT5G27320			AT3G45300		AT3G19895		AT3G07800		AT2G27660	AT4G28703	AT1G32340		AT1G79700	AT3G09900
											AT4G28400	AT5G27470			AT3G45310		AT3G19910		AT3G07880		AT2G27900	AT4G28860	AT4G17230		AT1G79710	AT3G09960
											AT4G28630	AT5G27650			AT3G45446		AT3G19930		AT3G08650		AT2G27920	AT4G29050	AT1G72710		AT1G79830	AT3G10010
											AT4G28703	AT5G27710			AT3G45520		AT3G20250		AT3G08710		AT2G28120	AT4G29190	AT3G03870		AT1G79930	AT3G10020
											AT4G28720	AT5G27860			AT3G45525		AT3G20395		AT3G08720		AT2G28160	AT4G29380	AT5G66640		AT1G79940	AT3G10120
											AT4G28880	AT5G34853			AT3G45620		AT3G20410		AT3G08760		AT2G28360	AT4G29735	AT4G39830		AT1G80130	AT3G10250
											AT4G28980	AT5G35460			AT3G45640		AT3G20420		AT3G08780		AT2G28500	AT4G29750	AT2G12490		AT1G80170	AT3G10260
											AT4G29160	AT5G35777			AT3G45730		AT3G20510		AT3G08920		AT2G28630	AT4G29810	AT4G39580		AT1G80180	AT3G10550
											AT4G29380	AT5G35790			AT3G45775		AT3G20630		AT3G09000		AT2G28660	AT4G29950	AT1G09430		AT1G80190	AT3G10630
											AT4G29480	AT5G35910			AT3G46000		AT3G20670		AT3G09020		AT2G28755	AT4G30150	AT2G02370		AT1G80210	AT3G10740
											AT4G29560	AT5G36210			AT3G46183		AT3G20770		AT3G09030		AT2G28830	AT4G30640	AT1G15125		AT1G80230	AT3G10850
											AT4G29740	AT5G37590			AT3G46220		AT3G20920		AT3G09032		AT2G28840	AT4G30870	AT1G13210		AT1G80290	AT3G10860
											AT4G29950	AT5G37930			AT3G46440		AT3G21070		AT3G09040		AT2G28890	AT4G31230	AT1G03230		AT1G80310	AT3G10920
											AT4G30010	AT5G38470			AT3G46487		AT3G21080		AT3G09320		AT2G28940	AT4G31240	AT1G34220		AT1G80420	AT3G10985
											AT4G30280	AT5G38480			AT3G46510		AT3G21140		AT3G09410		AT2G29020	AT4G31340	AT2G17120		AT1G80450	AT3G11080
											AT4G30360	AT5G38780			AT3G46600		AT3G21420		AT3G09470		AT2G29065	AT4G31380	AT3G06380		AT1G80460	AT3G11100
											AT4G30410	AT5G38850			AT3G47000		AT3G21520		AT3G09480		AT2G29070	AT4G31510	AT2G23810		AT1G80510	AT3G11230
											AT4G30480	AT5G38860			AT3G47090		AT3G21610		AT3G09490		AT2G29100	AT4G31600	AT2G29340		AT1G80570	AT3G11270
											AT4G30690	AT5G38880			AT3G47160		AT3G21630		AT3G09735		AT2G29110	AT4G32010	AT5G22520		AT1G80650	AT3G11402
											AT4G30780	AT5G39080			AT3G47250		AT3G21640		AT3G09830		AT2G29340	AT4G32060	AT4G11300		AT1G80820	AT3G11450
											AT4G30845	AT5G39250			AT3G47480		AT3G21780		AT3G09840		AT2G29400	AT4G32180	AT1G56550		AT1G80830	AT3G11480
											AT4G30850	AT5G39360			AT3G47550		AT3G21781		AT3G10020		AT2G29640	AT4G32285	AT1G58180		AT1G80840	AT3G11800
											AT4G31050	AT5G39660			AT3G47570		AT3G21810		AT3G10030		AT2G29720	AT4G32470	AT3G26200		AT1G80890	AT3G11890
											AT4G31060	AT5G39720			AT3G47800		AT3G22060		AT3G10120		AT2G29960	AT4G32480	AT4G36040		AT1G80920	AT3G11910
											AT4G31480	AT5G39940			AT3G47810		AT3G22160		AT3G10210		AT2G29990	AT4G32530	AT2G41430		AT1G80950	AT3G12100
											AT4G31510	AT5G40460			AT3G47820		AT3G22260		AT3G10250		AT2G30140	AT4G32680	AT4G33300		AT1G80960	AT3G12290
											AT4G32060	AT5G40550			AT3G48040		AT3G22460		AT3G10300		AT2G30250	AT4G32760	AT3G13430		AT2G01010	AT3G12360
											AT4G32140	AT5G41100			AT3G48080		AT3G22600		AT3G10500		AT2G30260	AT4G33210	AT5G38210		AT2G01029	AT3G12490
											AT4G32280	AT5G41110			AT3G48090		AT3G22640		AT3G10630		AT2G30440	AT4G33510	AT5G08335		AT2G01040	AT3G12570
											AT4G32460	AT5G41120			AT3G48140		AT3G22845		AT3G10640		AT2G30530	AT4G33910	AT5G48657		AT2G01060	AT3G12600
											AT4G32530	AT5G41150			AT3G48170		AT3G23010		AT3G10740		AT2G30550	AT4G34030	AT1G49050		AT2G01100	AT3G12710
											AT4G32605	AT5G41280			AT3G48195		AT3G23030		AT3G10770		AT2G30590	AT4G34110	AT5G11850		AT2G01170	AT3G12760
											AT4G32650	AT5G41330			AT3G48360		AT3G23230		AT3G10915		AT2G30620	AT4G34270	AT1G12220		AT2G01180	AT3G12950
											AT4G32930	AT5G41590			AT3G48380		AT3G23280		AT3G10985		AT2G30770	AT4G34390	AT2G18660		AT2G01340	AT3G12965
											AT4G32990	AT5G41670			AT3G48390		AT3G23550		AT3G11010		AT2G30880	AT4G34460	AT5G40170		AT2G01350	AT3G12980
											AT4G33100	AT5G41761			AT3G48530		AT3G23560		AT3G11030		AT2G31020	AT4G34480	AT1G25275		AT2G01410	AT3G13062
											AT4G33540	AT5G41880			AT3G48590		AT3G24090		AT3G11040		AT2G31060	AT4G34500	AT3G12040		AT2G01450	AT3G13065
											AT4G33670	AT5G41910			AT3G48600		AT3G24900		AT3G11080		AT2G31090	AT4G34960	AT1G16670		AT2G01470	AT3G13080
											AT4G33780	AT5G42400			AT3G48640		AT3G25010		AT3G11230		AT2G31200	AT4G35020	AT1G28070		AT2G01490	AT3G13090
											AT4G34030	AT5G42470			AT3G48650		AT3G25020		AT3G11270		AT2G31350	AT4G35220	AT4G29190		AT2G01540	AT3G13100
											AT4G34150	AT5G42650			AT3G48680		AT3G25070		AT3G11540		AT2G31585	AT4G35230	AT4G23230		AT2G01600	AT3G13200
											AT4G34200	AT5G42660			AT3G48760		AT3G25510		AT3G11820		AT2G31800	AT4G35310	AT5G52240		AT2G01650	AT3G13310
											AT4G34215	AT5G42850			AT3G48780		AT3G25610		AT3G11840		AT2G31810	AT4G35750	AT5G24110		AT2G01670	AT3G13430
											AT4G34380	AT5G42860			AT3G48850		AT3G25910		AT3G11850		AT2G31865	AT4G35780	AT1G14400		AT2G01720	AT3G13433
											AT4G34450	AT5G43280			AT3G48880		AT3G26020		AT3G11910		AT2G31870	AT4G35785	AT5G25770		AT2G01860	AT3G13437
											AT4G34760	AT5G43400			AT3G48890		AT3G26090		AT3G12040		AT2G31880	AT4G36040	AT1G15020		AT2G01930	AT3G13450
											AT4G34770	AT5G43440			AT3G49350		AT3G26165		AT3G12070		AT2G31955	AT4G36090	AT4G16008		AT2G02010	AT3G13550
											AT4G34790	AT5G43670			AT3G49370		AT3G26170		AT3G12100		AT2G31970	AT4G36120	AT1G36060		AT2G02040	AT3G13610
											AT4G35260	AT5G43980			AT3G49490		AT3G26180		AT3G12220		AT2G31990	AT4G36210	AT2G01060		AT2G02060	AT3G13720
											AT4G35440	AT5G44260			AT3G49550		AT3G26200		AT3G12250		AT2G32000	AT4G36220	AT4G08470		AT2G02110	AT3G13860
											AT4G35480	AT5G44569			AT3G49590		AT3G26210		AT3G12290		AT2G32030	AT4G36470	AT3G51890		AT2G02180	AT3G14010
											AT4G35630	AT5G44570			AT3G49780		AT3G26220		AT3G12360		AT2G32160	AT4G36520	AT3G18830		AT2G02220	AT3G14050
											AT4G35850	AT5G44572			AT3G49790		AT3G26230		AT3G12490		AT2G32190	AT4G36550	AT3G55830		AT2G02350	AT3G14120
											AT4G35880	AT5G44580			AT3G49800		AT3G26470		AT3G12570		AT2G32380	AT4G36670	AT1G58190		AT2G02360	AT3G14290
											AT4G36195	AT5G44910			AT3G50210		AT3G26500		AT3G12630		AT2G32520	AT4G36790	AT3G47160		AT2G02370	AT3G14310
											AT4G36290	AT5G45100			AT3G50260		AT3G26600		AT3G12740		AT2G32680	AT4G36945	AT4G35750		AT2G02390	AT3G14410
											AT4G36410	AT5G45160			AT3G50470		AT3G26670		AT3G12830		AT2G32700	AT4G36970	AT1G10340		AT2G02400	AT3G14430
											AT4G36430	AT5G45360			AT3G50480		AT3G26740		AT3G12910		AT2G32730	AT4G37180	AT3G07690		AT2G02410	AT3G14460
											AT4G36630	AT5G45440			AT3G50500		AT3G26810		AT3G12950		AT2G32870	AT4G37190	AT2G45010		AT2G02450	AT3G14470
											AT4G36648	AT5G45650			AT3G50700		AT3G26830		AT3G12980		AT2G32880	AT4G37260	AT1G25580		AT2G02710	AT3G14560
											AT4G36720	AT5G45810			AT3G50740		AT3G26840		AT3G13050		AT2G32885	AT4G37370	AT5G61060		AT2G02760	AT3G14590
											AT4G37190	AT5G45840			AT3G50750		AT3G26910		AT3G13080		AT2G32900	AT4G37390	AT5G25050		AT2G02810	AT3G14680
											AT4G37290	AT5G45900			AT3G50900		AT3G26980		AT3G13090		AT2G33020	AT4G37820	AT2G43000		AT2G02850	AT3G14830
											AT4G37300	AT5G45990			AT3G50950		AT3G27380		AT3G13200		AT2G33051	AT4G38180	AT1G09970		AT2G02930	AT3G14840
											AT4G37530	AT5G46150			AT3G51000		AT3G27530		AT3G13225		AT2G33080	AT4G38360	AT3G49590		AT2G02960	AT3G15000
											AT4G37540	AT5G46210			AT3G51260		AT3G27560		AT3G13310		AT2G33120	AT4G38460	AT2G43850		AT2G03120	AT3G15070
											AT4G37550	AT5G47080			AT3G51310		AT3G27610		AT3G13330		AT2G33150	AT4G38470	AT5G64410		AT2G03330	AT3G15130
											AT4G37770	AT5G47240			AT3G51330		AT3G27890		AT3G13430		AT2G33170	AT4G38550	AT1G34380		AT2G03410	AT3G15160
											AT4G37900	AT5G47370			AT3G51340		AT3G27997		AT3G13433		AT2G33220	AT4G38932	AT4G33620		AT2G03430	AT3G15290
											AT4G38040	AT5G47520			AT3G51390		AT3G28180		AT3G13437		AT2G33290	AT4G39090	AT2G44420		AT2G03450	AT3G15355
											AT4G38420	AT5G48020			AT3G51430		AT3G28340		AT3G13450		AT2G33470	AT4G39140	AT4G28710		AT2G03505	AT3G15358
											AT4G38470	AT5G48370			AT3G51440		AT3G28450		AT3G13550		AT2G33490	AT4G39380	AT3G56310		AT2G03510	AT3G15450
											AT4G38560	AT5G48560			AT3G51610		AT3G28480		AT3G13672		AT2G33580	AT4G39830	AT2G46900		AT2G03530	AT3G15500
											AT4G38825	AT5G48570			AT3G51660		AT3G28510		AT3G13790		AT2G33630	AT5G01010	AT4G23450		AT2G03540	AT3G15580
											AT4G38850	AT5G48720			AT3G51830		AT3G28580		AT3G13950		AT2G33830	AT5G01100	AT2G23320		AT2G03590	AT3G15590
											AT4G38900	AT5G48780			AT3G51890		AT3G28690		AT3G14010		AT2G34040	AT5G01450	AT5G43470		AT2G03620	AT3G15600
											AT4G39200	AT5G48810			AT3G51920		AT3G28715		AT3G14050		AT2G34250	AT5G01620	AT5G57630		AT2G03680	AT3G15610
											AT4G39220	AT5G49510			AT3G52070		AT3G28850		AT3G14090		AT2G34470	AT5G01750	AT3G06580		AT2G03690	AT3G15630
											AT4G39370	AT5G49945			AT3G52200		AT3G28865		AT3G14130		AT2G34690	AT5G01800	AT5G24610		AT2G03760	AT3G15730
											AT4G39660	AT5G50410			AT3G52240		AT3G28890		AT3G14180		AT2G34940	AT5G01950	AT4G12120		AT2G03870	AT3G15760
											AT4G39670	AT5G50790			AT3G52400		AT3G28910		AT3G14280		AT2G35050	AT5G01980	AT3G21780		AT2G04040	AT3G15840
											AT5G01100	AT5G50850			AT3G52430		AT3G28940		AT3G14310		AT2G35060	AT5G01990	AT4G15070		AT2G04050	AT3G15970
											AT5G01530	AT5G50950			AT3G53120		AT3G29000		AT3G14460		AT2G35070	AT5G02020	AT4G24390		AT2G04070	AT3G16030
											AT5G01540	AT5G50970			AT3G53150		AT3G29034		AT3G14470		AT2G35110	AT5G02040	AT5G03455		AT2G04080	AT3G16470
											AT5G01550	AT5G51160			AT3G53340		AT3G29035		AT3G14990		AT2G35240	AT5G02150	AT5G49570		AT2G04305	AT3G16565
											AT5G01600	AT5G51190			AT3G53410		AT3G29130		AT3G15040		AT2G35650	AT5G02290	AT3G57700		AT2G04340	AT3G16700
											AT5G01620	AT5G51300			AT3G53490		AT3G29170		AT3G15070		AT2G35680	AT5G02310	AT3G15760		AT2G04400	AT3G16740
											AT5G01732	AT5G51370			AT3G53650		AT3G29240		AT3G15160		AT2G35930	AT5G02810	AT1G68000		AT2G04430	AT3G16785
											AT5G02010	AT5G51840			AT3G53780		AT3G30775		AT3G15290		AT2G35980	AT5G02820	AT2G39400		AT2G04450	AT3G16857
											AT5G02490	AT5G52545			AT3G53800		AT3G33189		AT3G15355		AT2G36060	AT5G02880	AT4G19970		AT2G04490	AT3G17020
											AT5G02570	AT5G53150			AT3G53810		AT3G42790		AT3G15356		AT2G36220	AT5G03020	AT1G74360		AT2G04495	AT3G17205
											AT5G02620	AT5G53340			AT3G53970		AT3G43520		AT3G15358		AT2G36320	AT5G03240	AT1G01560		AT2G04515	AT3G17410
											AT5G02650	AT5G53350			AT3G53990		AT3G43670		AT3G15390		AT2G36330	AT5G03320	AT3G50500		AT2G04550	AT3G17420
											AT5G02760	AT5G54430			AT3G54010		AT3G44326		AT3G15510		AT2G36360	AT5G03330	AT1G34180		AT2G04620	AT3G17465
											AT5G03050	AT5G54540			AT3G54100		AT3G44330		AT3G15518		AT2G36400	AT5G03360	AT1G14740		AT2G04650	AT3G17770
											AT5G03230	AT5G54730			AT3G54110		AT3G44350		AT3G15530		AT2G36420	AT5G03460	AT3G27560		AT2G04690	AT3G17850
											AT5G03240	AT5G54855			AT3G54150		AT3G44400		AT3G15580		AT2G36430	AT5G03540	AT1G21100		AT2G04852	AT3G17940
											AT5G03345	AT5G55450			AT3G54300		AT3G44670		AT3G15630		AT2G36470	AT5G03610	AT2G01650		AT2G04860	AT3G18035
											AT5G03360	AT5G55600			AT3G54440		AT3G45040		AT3G15710		AT2G36580	AT5G04020	AT2G21520		AT2G04890	AT3G18080
											AT5G03470	AT5G55850			AT3G54620		AT3G45060		AT3G15730		AT2G36670	AT5G04040			AT2G04900	AT3G18270
											AT5G03850	AT5G55896			AT3G54790		AT3G45260		AT3G15760		AT2G36680	AT5G04220			AT2G05030	AT3G18350
											AT5G04190	AT5G55940			AT3G54850		AT3G45290		AT3G15770		AT2G36690	AT5G04235			AT2G05040	AT3G18370
											AT5G04340	AT5G56230			AT3G54880		AT3G45300		AT3G16030		AT2G36900	AT5G04560			AT2G05240	AT3G18560
											AT5G04360	AT5G56520			AT3G54960		AT3G45310		AT3G16190		AT2G37110	AT5G04750			AT2G05260	AT3G18580
											AT5G04480	AT5G56550			AT3G55450		AT3G45330		AT3G16500		AT2G37120	AT5G04780			AT2G05320	AT3G18690
											AT5G04510	AT5G56730			AT3G55600		AT3G45620		AT3G16565		AT2G37130	AT5G04895			AT2G05380	AT3G18760
											AT5G04590	AT5G56840			AT3G55830		AT3G45640		AT3G16640		AT2G37150	AT5G04920			AT2G05518	AT3G18770
											AT5G04740	AT5G57150			AT3G55840		AT3G45730		AT3G16700		AT2G37160	AT5G04930			AT2G05520	AT3G18860
											AT5G04895	AT5G57330			AT3G56190		AT3G45860		AT3G16720		AT2G37430	AT5G05010			AT2G05630	AT3G18930
											AT5G05010	AT5G57340			AT3G56310		AT3G46090		AT3G16740		AT2G37520	AT5G05090			AT2G05765	AT3G18940
											AT5G05110	AT5G57500			AT3G56400		AT3G46110		AT3G16770		AT2G37678	AT5G05100			AT2G05840	AT3G19190
											AT5G05140	AT5G57660			AT3G56410		AT3G46220		AT3G16785		AT2G37680	AT5G05190			AT2G06002	AT3G19270
											AT5G05230	AT5G57780			AT3G56710		AT3G46280		AT3G16857		AT2G37710	AT5G05230			AT2G06025	AT3G19290
											AT5G05435	AT5G58030			AT3G56720		AT3G46484		AT3G16990		AT2G37820	AT5G05320			AT2G06340	AT3G19400
											AT5G05590	AT5G58590			AT3G56800		AT3G46510		AT3G17020		AT2G37840	AT5G05660			AT2G06490	AT3G19420
											AT5G05610	AT5G58640			AT3G56930		AT3G46690		AT3G17100		AT2G37920	AT5G05750			AT2G06510	AT3G19460
											AT5G05620	AT5G58670			AT3G57050		AT3G46930		AT3G17205		AT2G37940	AT5G06320			AT2G06530	AT3G19490
											AT5G05660	AT5G58740			AT3G57090		AT3G47090		AT3G17280		AT2G37950	AT5G06370			AT2G07180	AT3G19520
											AT5G05760	AT5G58790			AT3G57280		AT3G47160		AT3G17410		AT2G37980	AT5G06730			AT2G07240	AT3G19553
											AT5G05780	AT5G59070			AT3G57330		AT3G47250		AT3G17700		AT2G38000	AT5G06750			AT2G07340	AT3G19580
											AT5G05790	AT5G59140			AT3G57460		AT3G47300		AT3G17880		AT2G38020	AT5G06810			AT2G07360	AT3G19615
											AT5G05850	AT5G59160			AT3G57480		AT3G47550		AT3G17940		AT2G38130	AT5G06865			AT2G07693	AT3G19930
											AT5G05930	AT5G59430			AT3G57550		AT3G47570		AT3G18020		AT2G38290	AT5G07100			AT2G07715	AT3G20050
											AT5G05950	AT5G59700			AT3G57640		AT3G47800		AT3G18035		AT2G38410	AT5G07150			AT2G07727	AT3G20060
											AT5G06320	AT5G59840			AT3G57700		AT3G47810		AT3G18080		AT2G38470	AT5G07290			AT2G07808	AT3G20280
											AT5G06420	AT5G60190			AT3G58530		AT3G47820		AT3G18250		AT2G38790	AT5G07300			AT2G07811	AT3G20290
											AT5G06690	AT5G60200			AT3G58600		AT3G48080		AT3G18270		AT2G38860	AT5G07360			AT2G11520	AT3G20420
											AT5G06865	AT5G60370			AT3G58640		AT3G48090		AT3G18350		AT2G38960	AT5G07610			AT2G11670	AT3G20440
											AT5G06930	AT5G60680			AT3G58680		AT3G48140		AT3G18370		AT2G39050	AT5G07770			AT2G12210	AT3G20630
											AT5G07010	AT5G60730			AT3G58750		AT3G48170		AT3G18690		AT2G39100	AT5G07790			AT2G12490	AT3G20670
											AT5G07590	AT5G60870			AT3G59090		AT3G48195		AT3G18830		AT2G39200	AT5G07820			AT2G12550	AT3G20770
											AT5G07790	AT5G61150			AT3G59110		AT3G48380		AT3G18860		AT2G39210	AT5G07860			AT2G13100	AT3G20960
											AT5G07810	AT5G61440			AT3G59380		AT3G48523		AT3G18930		AT2G39260	AT5G07870			AT2G13170	AT3G21175
											AT5G07820	AT5G61490			AT3G59570		AT3G48530		AT3G19010		AT2G39270	AT5G08120			AT2G13250	AT3G21520
											AT5G07860	AT5G61550			AT3G59660		AT3G48630		AT3G19190		AT2G39350	AT5G08310			AT2G13450	AT3G21640
											AT5G08260	AT5G61640			AT3G59700		AT3G48640		AT3G19260		AT2G39400	AT5G08335			AT2G13460	AT3G21805
											AT5G08320	AT5G61910			AT3G60190		AT3G48650		AT3G19390		AT2G39480	AT5G08380			AT2G13560	AT3G21810
											AT5G08330	AT5G62180			AT3G60200		AT3G48750		AT3G19420		AT2G39550	AT5G08580			AT2G13650	AT3G22060
											AT5G08410	AT5G62270			AT3G60260		AT3G48760		AT3G19490		AT2G39660	AT5G09290			AT2G13790	AT3G22190
											AT5G08565	AT5G62760			AT3G60290		AT3G48780		AT3G19540		AT2G39780	AT5G09420			AT2G13800	AT3G22400
											AT5G09290	AT5G62950			AT3G60300		AT3G48850		AT3G19553		AT2G39920	AT5G09620			AT2G13810	AT3G22460
											AT5G09300	AT5G63020			AT3G60340		AT3G48890		AT3G19770		AT2G39960	AT5G09690			AT2G14080	AT3G22600
											AT5G09410	AT5G63180			AT3G60390		AT3G49060		AT3G19895		AT2G40000	AT5G09710			AT2G14120	AT3G22630
											AT5G09630	AT5G63280			AT3G60420		AT3G49120		AT3G19930		AT2G40095	AT5G10380			AT2G14170	AT3G22640
											AT5G09800	AT5G63470			AT3G60450		AT3G49350		AT3G20060		AT2G40110	AT5G10560			AT2G14255	AT3G22910
											AT5G09900	AT5G63480			AT3G60470		AT3G49400		AT3G20080		AT2G40140	AT5G10600			AT2G14410	AT3G22961
											AT5G10030	AT5G63830			AT3G60530		AT3G49490		AT3G20250		AT2G40180	AT5G10695			AT2G14560	AT3G23010
											AT5G10290	AT5G63870			AT3G60540		AT3G49530		AT3G20340		AT2G40410	AT5G10760			AT2G14610	AT3G23330
											AT5G10380	AT5G63890			AT3G60590		AT3G49590		AT3G20410		AT2G40420	AT5G10780			AT2G14680	AT3G23480
											AT5G10400	AT5G63970			AT3G60600		AT3G49780		AT3G20440		AT2G40600	AT5G10790			AT2G14720	AT3G23690
											AT5G10570	AT5G64160			AT3G60690		AT3G49790		AT3G20660		AT2G40740	AT5G10860			AT2G14740	AT3G23900
											AT5G10710	AT5G64220			AT3G60820		AT3G49800		AT3G20670		AT2G40810	AT5G11000			AT2G14830	AT3G24315
											AT5G10745	AT5G64260			AT3G60966		AT3G50140		AT3G20770		AT2G40940	AT5G11040			AT2G14835	AT3G24900
											AT5G10760	AT5G64270			AT3G61010		AT3G50210		AT3G20960		AT2G41100	AT5G11060			AT2G14878	AT3G24927
											AT5G11140	AT5G64350			AT3G61060		AT3G50260		AT3G21080		AT2G41110	AT5G11280			AT2G15040	AT3G25020
											AT5G11280	AT5G64470			AT3G61070		AT3G50470		AT3G21140		AT2G41220	AT5G11490			AT2G15042	AT3G25040
											AT5G11290	AT5G64600			AT3G61180		AT3G50480		AT3G21175		AT2G41420	AT5G11560			AT2G15230	AT3G25150
											AT5G11520	AT5G64750			AT3G61210		AT3G50500		AT3G21280		AT2G41430	AT5G11720			AT2G15240	AT3G25250
											AT5G11580	AT5G64780			AT3G61630		AT3G50650		AT3G21520		AT2G41490	AT5G11910			AT2G15390	AT3G25510
											AT5G11600	AT5G64813			AT3G61790		AT3G50700		AT3G21610		AT2G41530	AT5G11920			AT2G15480	AT3G25610
											AT5G11800	AT5G64890			AT3G61860		AT3G50740		AT3G21630		AT2G41710	AT5G12120			AT2G15555	AT3G25910
											AT5G11890	AT5G64910			AT3G62370		AT3G50750		AT3G21640		AT2G41730	AT5G12350			AT2G15570	AT3G26115
											AT5G11920	AT5G65207			AT3G62550		AT3G50770		AT3G21740		AT2G41740	AT5G12370			AT2G15790	AT3G26165
											AT5G12040	AT5G65260			AT3G62600		AT3G50810		AT3G21780		AT2G41780	AT5G12420			AT2G15830	AT3G26170
											AT5G12050	AT5G65480			AT3G62860		AT3G50900		AT3G21781		AT2G41835	AT5G12940			AT2G15860	AT3G26180
											AT5G12140	AT5G65495			AT3G62950		AT3G50920		AT3G21790		AT2G41880	AT5G13010			AT2G15880	AT3G26190
											AT5G12350	AT5G65560			AT3G63030		AT3G50930		AT3G21810		AT2G42160	AT5G13190			AT2G15890	AT3G26200
											AT5G12880	AT5G65660			AT3G63080		AT3G50950		AT3G22060		AT2G42360	AT5G13210			AT2G15900	AT3G26220
											AT5G12950	AT5G65760			AT3G63210		AT3G51130		AT3G22160		AT2G42390	AT5G13260			AT2G15960	AT3G26280
											AT5G13260	AT5G66120			AT3G63220		AT3G51330		AT3G22180		AT2G42400	AT5G13300			AT2G16000	AT3G26500
											AT5G13420	AT5G66380			AT3G63420		AT3G51340		AT3G22200		AT2G42520	AT5G13570			AT2G16060	AT3G26600
											AT5G13430	AT5G66480			AT3G66654		AT3G51390		AT3G22260		AT2G42680	AT5G14270			AT2G16310	AT3G26612
											AT5G13550	AT5G66490			AT4G00240		AT3G51430		AT3G22430		AT2G42790	AT5G14490			AT2G16405	AT3G26720
											AT5G13750	AT5G67230			AT4G00355		AT3G51550		AT3G22460		AT2G42890	AT5G14930			AT2G16530	AT3G26740
											AT5G14060	AT5G67410			AT4G01010		AT3G51660		AT3G22620		AT2G42950	AT5G15020			AT2G16595	AT3G27230
											AT5G14180	AT5G67520			AT4G01040		AT3G51670		AT3G22820		AT2G43000	AT5G15860			AT2G16600	AT3G27260
											AT5G14200	ATCG00570			AT4G01320		AT3G51840		AT3G22910		AT2G43050	AT5G16080			AT2G16640	AT3G27280
											AT5G14210	ATMG00660			AT4G01370		AT3G51890		AT3G23230		AT2G43060	AT5G16120			AT2G16660	AT3G27530
											AT5G14260				AT4G01610		AT3G51920		AT3G23280		AT2G43080	AT5G16170			AT2G16670	AT3G27870
											AT5G14360				AT4G01670		AT3G52240		AT3G23480		AT2G43140	AT5G16260			AT2G16710	AT3G28007
											AT5G14430				AT4G01700		AT3G52400		AT3G23490		AT2G43160	AT5G16270			AT2G16790	AT3G28180
											AT5G14470				AT4G01720		AT3G52430		AT3G23550		AT2G43210	AT5G16370			AT2G16870	AT3G28480
											AT5G14540				AT4G01740		AT3G52450		AT3G23560		AT2G43350	AT5G16420			AT2G16930	AT3G28660
											AT5G14590				AT4G01750		AT3G52640		AT3G23600		AT2G43540	AT5G16780			AT2G17040	AT3G28850
											AT5G14730				AT4G01940		AT3G52990		AT3G24315		AT2G43570	AT5G16800			AT2G17060	AT3G28865
											AT5G15022				AT4G02030		AT3G53030		AT3G24900		AT2G43620	AT5G16820			AT2G17110	AT3G28910
											AT5G15130				AT4G02050		AT3G53120		AT3G25020		AT2G43640	AT5G16880			AT2G17115	AT3G28945
											AT5G15160				AT4G02220		AT3G53180		AT3G25070		AT2G43680	AT5G17125			AT2G17120	AT3G29035
											AT5G15320				AT4G02340		AT3G53270		AT3G25250		AT2G43790	AT5G17690			AT2G17130	AT3G29075
											AT5G15580				AT4G02350		AT3G53410		AT3G25597		AT2G43820	AT5G17880			AT2G17200	AT3G29080
											AT5G15650				AT4G02370		AT3G53490		AT3G25610		AT2G43850	AT5G18110			AT2G17220	AT3G29240
											AT5G15880				AT4G02380		AT3G53780		AT3G25900		AT2G43970	AT5G18170			AT2G17290	AT3G29320
											AT5G16030				AT4G02440		AT3G53800		AT3G26020		AT2G44065	AT5G18210			AT2G17380	AT3G29350
											AT5G16050				AT4G02480		AT3G53810		AT3G26090		AT2G44100	AT5G18360			AT2G17420	AT3G29370
											AT5G16060				AT4G02520		AT3G53990		AT3G26165		AT2G44140	AT5G18370			AT2G17440	AT3G29400
											AT5G16120				AT4G02550		AT3G54010		AT3G26170		AT2G44180	AT5G18600			AT2G17450	AT3G29575
											AT5G16400				AT4G02740		AT3G54070		AT3G26180		AT2G44290	AT5G18620			AT2G17520	AT3G29650
											AT5G16480				AT4G03030		AT3G54085		AT3G26200		AT2G44360	AT5G18640			AT2G17525	AT3G29736
											AT5G16550				AT4G03080		AT3G54100		AT3G26210		AT2G44370	AT5G18750			AT2G17560	AT3G29739
											AT5G16570				AT4G03120		AT3G54110		AT3G26220		AT2G44380	AT5G18780			AT2G17570	AT3G30120
											AT5G17250				AT4G03450		AT3G54150		AT3G26230		AT2G44410	AT5G18820			AT2G17705	AT3G30380
											AT5G17330				AT4G03510		AT3G54300		AT3G26280		AT2G44420	AT5G19120			AT2G17710	AT3G30393
											AT5G17610				AT4G03560		AT3G54380		AT3G26440		AT2G44480	AT5G19140			AT2G17720	AT3G30396
											AT5G17860				AT4G04220		AT3G54620		AT3G26470		AT2G44490	AT5G19250			AT2G17730	AT3G30410
											AT5G18010				AT4G04330		AT3G54780		AT3G26500		AT2G44530	AT5G19450			AT2G17740	AT3G30610
											AT5G18050				AT4G04480		AT3G54790		AT3G26600		AT2G44610	AT5G19590			AT2G17760	AT3G30620
											AT5G18060				AT4G04500		AT3G54850		AT3G26612		AT2G44660	AT5G19690			AT2G17790	AT3G30775
											AT5G18080				AT4G04510		AT3G54960		AT3G26720		AT2G44850	AT5G19860			AT2G17880	AT3G30837
											AT5G18230				AT4G04540		AT3G55150		AT3G26740		AT2G45010	AT5G19880			AT2G17920	AT3G30838
											AT5G18590				AT4G04630		AT3G55260		AT3G26830		AT2G45070	AT5G19980			AT2G17975	AT3G31945
											AT5G18630				AT4G04695		AT3G55270		AT3G26840		AT2G45140	AT5G20350			AT2G17980	AT3G32010
											AT5G18650				AT4G04720		AT3G55450		AT3G26910		AT2G45170	AT5G20500			AT2G17990	AT3G32110
											AT5G18760				AT4G04740		AT3G55470		AT3G26980		AT2G45200	AT5G20660			AT2G18000	AT3G32226
											AT5G18800				AT4G04800		AT3G55830		AT3G27030		AT2G45500	AT5G20890			AT2G18050	AT3G32240
											AT5G18900				AT4G04860		AT3G55840		AT3G27530		AT2G45510	AT5G20900			AT2G18170	AT3G33067
											AT5G18930				AT4G04910		AT3G55880		AT3G27560		AT2G45540	AT5G21090			AT2G18250	AT3G33072
											AT5G19010				AT4G04960		AT3G55950		AT3G27670		AT2G45630	AT5G21170			AT2G18280	AT3G33151
											AT5G19070				AT4G04972		AT3G55960		AT3G27997		AT2G45660	AT5G22000			AT2G18350	AT3G33166
											AT5G19120				AT4G05060		AT3G55980		AT3G28100		AT2G45790	AT5G22080			AT2G18650	AT3G33189
											AT5G19180				AT4G05070		AT3G56190		AT3G28210		AT2G45910	AT5G22270			AT2G18660	AT3G33225
											AT5G19190				AT4G05150		AT3G56210		AT3G28370		AT2G45980	AT5G22360			AT2G18670	AT3G42050
											AT5G19330				AT4G05330		AT3G56240		AT3G28450		AT2G46000	AT5G22450			AT2G18690	AT3G42431
											AT5G19440				AT4G05460		AT3G56310		AT3G28480		AT2G46020	AT5G22510			AT2G18700	AT3G42650
											AT5G19530				AT4G08330		AT3G56400		AT3G28580		AT2G46150	AT5G22920			AT2G18750	AT3G42719
											AT5G19550				AT4G08470		AT3G56410		AT3G28690		AT2G46180	AT5G23240			AT2G18770	AT3G42720
											AT5G19680				AT4G08480		AT3G56710		AT3G28715		AT2G46200	AT5G23660			AT2G18840	AT3G42790
											AT5G19880				AT4G08555		AT3G56720		AT3G28850		AT2G46220	AT5G23880			AT2G19110	AT3G43128
											AT5G20180				AT4G08680		AT3G56800		AT3G28860		AT2G46260	AT5G24260			AT2G19130	AT3G43250
											AT5G20230				AT4G08720		AT3G57050		AT3G28890		AT2G46270	AT5G24450			AT2G19160	AT3G43520
											AT5G20480				AT4G08770		AT3G57090		AT3G28945		AT2G46330	AT5G24910			AT2G19180	AT3G43523
											AT5G20830				AT4G08850		AT3G57120		AT3G28950		AT2G46390	AT5G25050			AT2G19190	AT3G43670
											AT5G20885				AT4G09460		AT3G57240		AT3G29000		AT2G46430	AT5G25060			AT2G19250	AT3G43723
											AT5G20900				AT4G09570		AT3G57280		AT3G29034		AT2G46440	AT5G25210			AT2G19350	AT3G43828
											AT5G21070				AT4G10110		AT3G57330		AT3G29035		AT2G46470	AT5G25265			AT2G19470	AT3G43833
											AT5G21900				AT4G10500		AT3G57340		AT3G29320		AT2G46490	AT5G25270			AT2G19710	AT3G44042
											AT5G21940				AT4G10610		AT3G57450		AT3G30120		AT2G46500	AT5G25470			AT2G19740	AT3G44070
											AT5G22120				AT4G10790		AT3G57460		AT3G30214		AT2G46550	AT5G25790			AT2G19790	AT3G44200
											AT5G22130				AT4G10925		AT3G57480		AT3G32930		AT2G46560	AT5G25820			AT2G19800	AT3G44205
											AT5G22250				AT4G10970		AT3G57550		AT3G32940		AT2G46600	AT5G25910			AT2G19810	AT3G44326
											AT5G22380				AT4G11000		AT3G57630		AT3G42150		AT2G46620	AT5G26170			AT2G19950	AT3G44670
											AT5G22390				AT4G11170		AT3G57640		AT3G42790		AT2G46900	AT5G26340			AT2G20010	AT3G45253
											AT5G22400				AT4G11260		AT3G57700		AT3G43250		AT2G46940	AT5G26660			AT2G20050	AT3G45260
											AT5G22500				AT4G11300		AT3G57730		AT3G43300		AT2G47000	AT5G26690			AT2G20110	AT3G45270
											AT5G22540				AT4G11360		AT3G58530		AT3G43430		AT2G47130	AT5G26751			AT2G20120	AT3G45290
											AT5G22580				AT4G11370		AT3G58600		AT3G43670		AT2G47140	AT5G26830			AT2G20142	AT3G45300
											AT5G22690				AT4G11470		AT3G58640		AT3G43790		AT2G47210	AT5G26860			AT2G20230	AT3G45310
											AT5G22790				AT4G11521		AT3G58750		AT3G44300		AT2G47390	AT5G27280			AT2G20320	AT3G45330
											AT5G22920				AT4G11530		AT3G59020		AT3G44326		AT2G47470	AT5G27430			AT2G20390	AT3G45410
											AT5G23010				AT4G11670		AT3G59080		AT3G44350		AT2G47640	AT5G27720			AT2G20420	AT3G45520
											AT5G23020				AT4G11740		AT3G59090		AT3G44400		AT2G47650	AT5G27830			AT2G20530	AT3G45525
											AT5G23130				AT4G11840		AT3G59380		AT3G45040		AT2G47680	AT5G27860			AT2G20630	AT3G45710
											AT5G23200				AT4G11850		AT3G59570		AT3G45060		AT2G47690	AT5G27920			AT2G20740	AT3G45730
											AT5G23240				AT4G11890		AT3G59660		AT3G45100		AT2G47730	AT5G27950			AT2G20760	AT3G45770
											AT5G23460				AT4G11900		AT3G59700		AT3G45260		AT2G47760	AT5G28785			AT2G20770	AT3G45775
											AT5G23535				AT4G12070		AT3G59810		AT3G45290		AT2G47960	AT5G28810			AT2G20780	AT3G45860
											AT5G23550				AT4G12120		AT3G59880		AT3G45300		AT2G47980	AT5G35200			AT2G20790	AT3G46000
											AT5G23670				AT4G12500		AT3G59920		AT3G45310		AT2G48030	AT5G35590			AT2G20850	AT3G46060
											AT5G23850				AT4G12570		AT3G60040		AT3G45330		AT3G01050	AT5G35690			AT2G20900	AT3G46487
											AT5G24490				AT4G12590		AT3G60130		AT3G45590		AT3G01080	AT5G36930			AT2G20930	AT3G46590
											AT5G24530				AT4G12720		AT3G60176		AT3G46000		AT3G01130	AT5G37600			AT2G20960	AT3G46600
											AT5G24620				AT4G13030		AT3G60190		AT3G46150		AT3G01170	AT5G37740			AT2G21120	AT3G46960
											AT5G25040				AT4G13510		AT3G60200		AT3G46280		AT3G01290	AT5G37780			AT2G21230	AT3G47010
											AT5G25190				AT4G13640		AT3G60260		AT3G46440		AT3G01310	AT5G37830			AT2G21240	AT3G47050
											AT5G26030				AT4G13830		AT3G60300		AT3G46510		AT3G01490	AT5G38210			AT2G21250	AT3G47160
											AT5G26940				AT4G14270		AT3G60420		AT3G46690		AT3G01720	AT5G38250			AT2G21350	AT3G47210
											AT5G27060				AT4G14365		AT3G60450		AT3G46930		AT3G01750	AT5G38630			AT2G21410	AT3G47220
											AT5G27395				AT4G14420		AT3G60470		AT3G47000		AT3G01770	AT5G38710			AT2G21470	AT3G47340
											AT5G27520				AT4G14430		AT3G60540		AT3G47010		AT3G01830	AT5G38850			AT2G21500	AT3G47530
											AT5G27850				AT4G14500		AT3G60600		AT3G47050		AT3G01850	AT5G38895			AT2G21520	AT3G47540
											AT5G28320				AT4G14610		AT3G60690		AT3G47090		AT3G01910	AT5G38990			AT2G21550	AT3G47550
											AT5G28630				AT4G14630		AT3G60800		AT3G47160		AT3G02065	AT5G39000			AT2G21620	AT3G47570
											AT5G28646				AT4G14800		AT3G60820		AT3G47210		AT3G02070	AT5G39050			AT2G21660	AT3G47610
											AT5G33290				AT4G14930		AT3G60860		AT3G47250		AT3G02090	AT5G39450			AT2G21840	AT3G47700
											AT5G35330				AT4G15070		AT3G61010		AT3G47300		AT3G02340	AT5G39950			AT2G21850	AT3G47800
											AT5G35730				AT4G15140		AT3G61070		AT3G47550		AT3G02360	AT5G40170			AT2G21870	AT3G47810
											AT5G35790				AT4G15233		AT3G61200		AT3G47570		AT3G02420	AT5G40660			AT2G21900	AT3G47840
											AT5G36970				AT4G15236		AT3G61210		AT3G47610		AT3G02520	AT5G40670			AT2G21950	AT3G48000
											AT5G37420				AT4G15260		AT3G61460		AT3G47800		AT3G02610	AT5G40690			AT2G22010	AT3G48170
											AT5G38110				AT4G15417		AT3G61540		AT3G47820		AT3G02630	AT5G40720			AT2G22122	AT3G48330
											AT5G38850				AT4G15420		AT3G61570		AT3G48000		AT3G02700	AT5G40840			AT2G22300	AT3G48360
											AT5G39080				AT4G15470		AT3G61630		AT3G48080		AT3G02710	AT5G40890			AT2G22310	AT3G48380
											AT5G39320				AT4G15760		AT3G61790		AT3G48090		AT3G02740	AT5G40910			AT2G22425	AT3G48390
											AT5G39510				AT4G15990		AT3G61860		AT3G48170		AT3G02770	AT5G40920			AT2G22480	AT3G48500
											AT5G39580				AT4G16000		AT3G62150		AT3G48210		AT3G02840	AT5G40990			AT2G22500	AT3G48523
											AT5G39610				AT4G16008		AT3G62240		AT3G48330		AT3G03000	AT5G41100			AT2G22570	AT3G48530
											AT5G39790				AT4G16130		AT3G62360		AT3G48380		AT3G03020	AT5G41110			AT2G22630	AT3G48600
											AT5G39800				AT4G16480		AT3G62370		AT3G48530		AT3G03070	AT5G41160			AT2G22660	AT3G48630
											AT5G40240				AT4G16520		AT3G62550		AT3G48630		AT3G03160	AT5G41685			AT2G22690	AT3G48640
											AT5G40500				AT4G16710		AT3G62600		AT3G48640		AT3G03310	AT5G41761			AT2G22830	AT3G48650
											AT5G40650				AT4G16892		AT3G62780		AT3G48650		AT3G03330	AT5G41940			AT2G22880	AT3G48780
											AT5G40670				AT4G16950		AT3G63000		AT3G48760		AT3G03490	AT5G42080			AT2G22910	AT3G48890
											AT5G40870				AT4G16960		AT3G63030		AT3G48780		AT3G03560	AT5G42090			AT2G23170	AT3G49060
											AT5G40920				AT4G17070		AT3G63080		AT3G48850		AT3G03570	AT5G42140			AT2G23200	AT3G49310
											AT5G41000				AT4G17080		AT3G63380		AT3G49060		AT3G03610	AT5G42400			AT2G23310	AT3G49320
											AT5G41100				AT4G17230		AT3G63420		AT3G49120		AT3G03640	AT5G42440			AT2G23320	AT3G49490
											AT5G41110				AT4G17245		AT3G66654		AT3G49310		AT3G03720	AT5G42530			AT2G23330	AT3G49590
											AT5G41210				AT4G17250		AT4G00300		AT3G49350		AT3G03740	AT5G42560			AT2G23450	AT3G49710
											AT5G41220				AT4G17270		AT4G00330		AT3G49370		AT3G03855	AT5G42820			AT2G23680	AT3G49725
											AT5G41590				AT4G17486		AT4G00355		AT3G49490		AT3G03870	AT5G42830			AT2G23720	AT3G49780
											AT5G41670				AT4G17490		AT4G00570		AT3G49520		AT3G04080	AT5G42870			AT2G23770	AT3G49790
											AT5G41740				AT4G17510		AT4G00700		AT3G49590		AT3G04090	AT5G42890			AT2G23810	AT3G49800
											AT5G41860				AT4G17660		AT4G00752		AT3G49620		AT3G04181	AT5G42950			AT2G23890	AT3G50010
											AT5G41910				AT4G17830		AT4G00780		AT3G49780		AT3G04220	AT5G43100			AT2G23940	AT3G50040
											AT5G42320				AT4G17900		AT4G00970		AT3G49800		AT3G04480	AT5G43320			AT2G24160	AT3G50260
											AT5G42380				AT4G17970		AT4G01010		AT3G50010		AT3G04580	AT5G43440			AT2G24180	AT3G50430
											AT5G42650				AT4G18170		AT4G01090		AT3G50140		AT3G04640	AT5G43470			AT2G24200	AT3G50470
											AT5G42840				AT4G18197		AT4G01320		AT3G50190		AT3G04670	AT5G43830			AT2G24240	AT3G50500
											AT5G42860				AT4G18205		AT4G01370		AT3G50210		AT3G04720	AT5G43900			AT2G24290	AT3G50590
											AT5G43280				AT4G18250		AT4G01610		AT3G50260		AT3G04740	AT5G44260			AT2G24360	AT3G50650
											AT5G43320				AT4G18340		AT4G01700		AT3G50420		AT3G04880	AT5G44572			AT2G24550	AT3G50700
											AT5G43420				AT4G18430		AT4G01720		AT3G50470		AT3G04910	AT5G44790			AT2G24600	AT3G50740
											AT5G43430				AT4G18530		AT4G01740		AT3G50480		AT3G04930	AT5G44820			AT2G24765	AT3G50750
											AT5G43450				AT4G18880		AT4G01750		AT3G50500		AT3G05010	AT5G44910			AT2G24850	AT3G50900
											AT5G43460				AT4G19003		AT4G01870		AT3G50650		AT3G05090	AT5G45000			AT2G24890	AT3G50920
											AT5G43600				AT4G19160		AT4G01910		AT3G50700		AT3G05120	AT5G45100			AT2G25000	AT3G50950
											AT5G43700				AT4G19185		AT4G02030		AT3G50740		AT3G05200	AT5G45110			AT2G25070	AT3G51010
											AT5G43710				AT4G19420		AT4G02200		AT3G50750		AT3G05230	AT5G45140			AT2G25110	AT3G51110
											AT5G43830				AT4G19660		AT4G02220		AT3G50770		AT3G05250	AT5G45340			AT2G25200	AT3G51130
											AT5G44005				AT4G19700		AT4G02330		AT3G50900		AT3G05280	AT5G45370			AT2G25260	AT3G51330
											AT5G44210				AT4G19860		AT4G02340		AT3G50930		AT3G05360	AT5G45470			AT2G25300	AT3G51340
											AT5G44260				AT4G19880		AT4G02350		AT3G50950		AT3G05530	AT5G45480			AT2G25310	AT3G51350
											AT5G44380				AT4G19970		AT4G02370		AT3G51000		AT3G05660	AT5G45490			AT2G25350	AT3G51360
											AT5G44420				AT4G19990		AT4G02380		AT3G51130		AT3G05675	AT5G45500			AT2G25470	AT3G51670
											AT5G44430				AT4G20000		AT4G02480		AT3G51330		AT3G05710	AT5G45510			AT2G25490	AT3G51830
											AT5G44720				AT4G20010		AT4G02520		AT3G51340		AT3G05760	AT5G45660			AT2G25510	AT3G51840
											AT5G45130				AT4G20110		AT4G02550		AT3G51370		AT3G05830	AT5G45750			AT2G25520	AT3G52060
											AT5G45140				AT4G20330		AT4G02740		AT3G51390		AT3G05930	AT5G45800			AT2G25730	AT3G52180
											AT5G45340				AT4G20410		AT4G03030		AT3G51430		AT3G05970	AT5G46050			AT2G25735	AT3G52240
											AT5G45550				AT4G20830		AT4G03080		AT3G51440		AT3G06050	AT5G46230			AT2G25740	AT3G52300
											AT5G45650				AT4G20930		AT4G03120		AT3G51550		AT3G06170	AT5G46250			AT2G25760	AT3G52400
											AT5G46350				AT4G21120		AT4G03420		AT3G51660		AT3G06210	AT5G46330			AT2G25770	AT3G52430
											AT5G46470				AT4G21390		AT4G03450		AT3G51730		AT3G06300	AT5G46400			AT2G25850	AT3G52850
											AT5G46710				AT4G21400		AT4G03460		AT3G51840		AT3G06380	AT5G46500			AT2G25910	AT3G52930
											AT5G46871				AT4G21450		AT4G03510		AT3G51890		AT3G06440	AT5G46520			AT2G25930	AT3G53020
											AT5G47040				AT4G21510		AT4G03530		AT3G51920		AT3G06450	AT5G46710			AT2G26030	AT3G53150
											AT5G47200				AT4G21534		AT4G03560		AT3G52200		AT3G06540	AT5G46871			AT2G26070	AT3G53270
											AT5G47220				AT4G21540		AT4G03920		AT3G52240		AT3G06580	AT5G46920			AT2G26190	AT3G53280
											AT5G47240				AT4G21560		AT4G04220		AT3G52400		AT3G06850	AT5G47090			AT2G26200	AT3G53310
											AT5G47370				AT4G21810		AT4G04223		AT3G52430		AT3G07010	AT5G47120			AT2G26210	AT3G53410
											AT5G47390				AT4G21840		AT4G04480		AT3G52850		AT3G07040	AT5G47250			AT2G26230	AT3G53580
											AT5G47850				AT4G21850		AT4G04500		AT3G52880		AT3G07060	AT5G47320			AT2G26240	AT3G53630
											AT5G47900				AT4G21926		AT4G04695		AT3G53180		AT3G07080	AT5G47580			AT2G26300	AT3G53650
											AT5G47940				AT4G21960		AT4G04720		AT3G53210		AT3G07180	AT5G47690			AT2G26390	AT3G53810
											AT5G47960				AT4G21980		AT4G04740		AT3G53270		AT3G07195	AT5G48160			AT2G26400	AT3G54010
											AT5G48370				AT4G22220		AT4G04800		AT3G53280		AT3G07220	AT5G48380			AT2G26430	AT3G54070
											AT5G48430				AT4G22305		AT4G04860		AT3G53310		AT3G07280	AT5G48580			AT2G26440	AT3G54100
											AT5G48580				AT4G22310		AT4G04910		AT3G53410		AT3G07370	AT5G48620			AT2G26510	AT3G54270
											AT5G48960				AT4G22330		AT4G04960		AT3G53490		AT3G07390	AT5G48775			AT2G26530	AT3G54440
											AT5G49520				AT4G22530		AT4G04972		AT3G53730		AT3G07520	AT5G49000			AT2G26560	AT3G54560
											AT5G49525				AT4G22540		AT4G05060		AT3G53800		AT3G07525	AT5G49555			AT2G26600	AT3G54670
											AT5G49555				AT4G22690		AT4G05070		AT3G53810		AT3G07570	AT5G49650			AT2G26650	AT3G54750
											AT5G49690				AT4G22980		AT4G05120		AT3G53970		AT3G07580	AT5G49760			AT2G26890	AT3G54850
											AT5G49710				AT4G22990		AT4G05150		AT3G53990		AT3G07600	AT5G50375			AT2G26970	AT3G54860
											AT5G49945				AT4G23040		AT4G05330		AT3G54010		AT3G07680	AT5G51180			AT2G27020	AT3G54880
											AT5G50330				AT4G23150		AT4G05460		AT3G54070		AT3G07690	AT5G51290			AT2G27050	AT3G55260
											AT5G50335				AT4G23180		AT4G06541		AT3G54100		AT3G07780	AT5G51400			AT2G27090	AT3G55270
											AT5G50850				AT4G23190		AT4G06558		AT3G54150		AT3G07800	AT5G52540			AT2G27150	AT3G55410
											AT5G50870				AT4G23210		AT4G06615		AT3G54270		AT3G07880	AT5G52810			AT2G27170	AT3G55450
											AT5G50950				AT4G23220		AT4G07507		AT3G54300		AT3G08530	AT5G52910			AT2G27200	AT3G55480
											AT5G50970				AT4G23230		AT4G07810		AT3G54380		AT3G08550	AT5G53460			AT2G27310	AT3G55700
											AT5G51190				AT4G23270		AT4G08131		AT3G54440		AT3G08610	AT5G53550			AT2G27480	AT3G55830
											AT5G51380				AT4G23280		AT4G08320		AT3G54620		AT3G08650	AT5G54140			AT2G27600	AT3G55840
											AT5G51640				AT4G23450		AT4G08330		AT3G54790		AT3G08690	AT5G54310			AT2G27660	AT3G56050
											AT5G51960				AT4G23460		AT4G08470		AT3G54860		AT3G08710	AT5G54500			AT2G27830	AT3G56190
											AT5G52390				AT4G23470		AT4G08480		AT3G55240		AT3G08720	AT5G54750			AT2G27900	AT3G56240
											AT5G52545				AT4G23530		AT4G08555		AT3G55270		AT3G08760	AT5G54900			AT2G27920	AT3G56440
											AT5G52560				AT4G23610		AT4G08850		AT3G55450		AT3G09000	AT5G55000			AT2G28110	AT3G56550
											AT5G52580				AT4G23650		AT4G09000		AT3G55470		AT3G09010	AT5G55100			AT2G28120	AT3G56690
											AT5G52870				AT4G23700		AT4G09380		AT3G55830		AT3G09020	AT5G55290			AT2G28160	AT3G56720
											AT5G52890				AT4G23710		AT4G09460		AT3G55950		AT3G09030	AT5G55420			AT2G28230	AT3G56800
											AT5G53120				AT4G23810		AT4G09570		AT3G55960		AT3G09040	AT5G55460			AT2G28360	AT3G56880
											AT5G54190				AT4G23870		AT4G09595		AT3G55980		AT3G09300	AT5G55600			AT2G28400	AT3G56930
											AT5G54270				AT4G23885		AT4G10500		AT3G56170		AT3G09320	AT5G56180			AT2G28500	AT3G57050
											AT5G54440				AT4G24040		AT4G10610		AT3G56190		AT3G09470	AT5G56550			AT2G28630	AT3G57090
											AT5G54510				AT4G24060		AT4G10730		AT3G56240		AT3G09490	AT5G56630			AT2G28660	AT3G57240
											AT5G54750				AT4G24230		AT4G10970		AT3G56310		AT3G09570	AT5G56870			AT2G28755	AT3G57340
											AT5G54800				AT4G24290		AT4G10980		AT3G56410		AT3G09690	AT5G57160			AT2G28830	AT3G57360
											AT5G54855				AT4G24390		AT4G10990		AT3G56460		AT3G09735	AT5G57190			AT2G28840	AT3G57420
											AT5G54900				AT4G24690		AT4G11000		AT3G56470		AT3G09740	AT5G57550			AT2G28890	AT3G57480
											AT5G54940				AT4G24800		AT4G11070		AT3G56550		AT3G09810	AT5G57580			AT2G28930	AT3G57520
											AT5G55190				AT4G24820		AT4G11170		AT3G56640		AT3G09830	AT5G57630			AT2G28940	AT3G57680
											AT5G55500				AT4G24920		AT4G11260		AT3G56720		AT3G09840	AT5G57655			AT2G29020	AT3G57930
											AT5G55560				AT4G24990		AT4G11300		AT3G56930		AT3G09940	AT5G57700			AT2G29065	AT3G58270
											AT5G55896				AT4G25030		AT4G11360		AT3G57050		AT3G09960	AT5G57780			AT2G29070	AT3G58530
											AT5G55940				AT4G25070		AT4G11370		AT3G57090		AT3G10010	AT5G58003			AT2G29100	AT3G58600
											AT5G56100				AT4G25110		AT4G11470		AT3G57120		AT3G10020	AT5G58220			AT2G29110	AT3G58670
											AT5G56190				AT4G25225		AT4G11521		AT3G57240		AT3G10030	AT5G58510			AT2G29340	AT3G58750
											AT5G56220				AT4G25350		AT4G11670		AT3G57330		AT3G10120	AT5G58575			AT2G29400	AT3G59010
											AT5G56320				AT4G25515		AT4G11690		AT3G57360		AT3G10210	AT5G58670			AT2G29640	AT3G59090
											AT5G56550				AT4G25720		AT4G11840		AT3G57450		AT3G10250	AT5G58720			AT2G29670	AT3G59380
											AT5G57060				AT4G25835		AT4G11850		AT3G57460		AT3G10260	AT5G59140			AT2G29720	AT3G59570
											AT5G57340				AT4G25940		AT4G11890		AT3G57480		AT3G10380	AT5G59662			AT2G29960	AT3G59810
											AT5G57460				AT4G25970		AT4G11900		AT3G57550		AT3G10500	AT5G59880			AT2G29990	AT3G59820
											AT5G57480				AT4G26060		AT4G12010		AT3G57700		AT3G10640	AT5G59890			AT2G30140	AT3G59920
											AT5G57550				AT4G26070		AT4G12070		AT3G57730		AT3G10740	AT5G59960			AT2G30250	AT3G59930
											AT5G57660				AT4G26090		AT4G12120		AT3G57790		AT3G10800	AT5G60040			AT2G30260	AT3G60130
											AT5G57780				AT4G26120		AT4G12470		AT3G58270		AT3G10850	AT5G60440			AT2G30440	AT3G60160
											AT5G58005				AT4G26160		AT4G12500		AT3G58490		AT3G10915	AT5G60620			AT2G30530	AT3G60190
											AT5G58030				AT4G26270		AT4G12570		AT3G58570		AT3G10985	AT5G60640			AT2G30550	AT3G60240
											AT5G58060				AT4G26288		AT4G12720		AT3G58600		AT3G11010	AT5G60800			AT2G30590	AT3G60260
											AT5G58375				AT4G26400		AT4G12900		AT3G58620		AT3G11030	AT5G60820			AT2G30600	AT3G60300
											AT5G58640				AT4G26550		AT4G13030		AT3G58670		AT3G11040	AT5G60840			AT2G30620	AT3G60450
											AT5G58670				AT4G26555		AT4G13360		AT3G58680		AT3G11080	AT5G60940			AT2G30720	AT3G60470
											AT5G58700				AT4G26910		AT4G13430		AT3G58750		AT3G11230	AT5G60950			AT2G30770	AT3G60580
											AT5G58740				AT4G26970		AT4G13510		AT3G59090		AT3G11270	AT5G61060			AT2G30880	AT3G60600
											AT5G58930				AT4G27260		AT4G13640		AT3G59150		AT3G11280	AT5G61210			AT2G30942	AT3G60710
											AT5G58960				AT4G27440		AT4G13820		AT3G59380		AT3G11320	AT5G61250			AT2G30945	AT3G60740
											AT5G59010				AT4G27450		AT4G13920		AT3G59410		AT3G11340	AT5G61260			AT2G30980	AT3G60820
											AT5G59080				AT4G27460		AT4G14110		AT3G59570		AT3G11402	AT5G61450			AT2G31020	AT3G60860
											AT5G59410				AT4G27470		AT4G14220		AT3G59660		AT3G11530	AT5G61500			AT2G31060	AT3G61010
											AT5G59430				AT4G27740		AT4G14270		AT3G59700		AT3G11540	AT5G61530			AT2G31090	AT3G61050
											AT5G59450				AT4G27745		AT4G14365		AT3G59770		AT3G11580	AT5G61590			AT2G31200	AT3G61060
											AT5G59550				AT4G27750		AT4G14370		AT3G59880		AT3G11770	AT5G62180			AT2G31350	AT3G61070
											AT5G59580				AT4G28240		AT4G14420		AT3G59950		AT3G11810	AT5G62460			AT2G31510	AT3G61180
											AT5G59662				AT4G28260		AT4G14450		AT3G60040		AT3G11820	AT5G62530			AT2G31585	AT3G61198
											AT5G59800				AT4G28270		AT4G14520		AT3G60190		AT3G11840	AT5G62610			AT2G31800	AT3G61200
											AT5G59820				AT4G28300		AT4G14610		AT3G60200		AT3G11850	AT5G62620			AT2G31810	AT3G61270
											AT5G59870				AT4G28350		AT4G14615		AT3G60260		AT3G11880	AT5G62630			AT2G31865	AT3G61570
											AT5G59880				AT4G28460		AT4G15070		AT3G60300		AT3G11910	AT5G62640			AT2G31870	AT3G61630
											AT5G59960				AT4G28490		AT4G15233		AT3G60340		AT3G11930	AT5G62770			AT2G31880	AT3G61710
											AT5G60190				AT4G28540		AT4G15236		AT3G60420		AT3G12030	AT5G62900			AT2G31945	AT3G61790
											AT5G60680				AT4G28652		AT4G15260		AT3G60470		AT3G12040	AT5G63030			AT2G31955	AT3G61900
											AT5G60730				AT4G28703		AT4G15417		AT3G60590		AT3G12100	AT5G63080			AT2G31970	AT3G62010
											AT5G60760				AT4G28710		AT4G15420		AT3G60600		AT3G12220	AT5G63120			AT2G31990	AT3G62240
											AT5G60840				AT4G28770		AT4G15470		AT3G60640		AT3G12250	AT5G63190			AT2G32000	AT3G62290
											AT5G61600				AT4G28860		AT4G15520		AT3G60690		AT3G12290	AT5G63410			AT2G32010	AT3G62360
											AT5G61610				AT4G28880		AT4G15530		AT3G60710		AT3G12360	AT5G63620			AT2G32030	AT3G62370
											AT5G61780				AT4G29010		AT4G15760		AT3G60860		AT3G12490	AT5G63650			AT2G32080	AT3G62455
											AT5G61890				AT4G29040		AT4G15975		AT3G61010		AT3G12570	AT5G63680			AT2G32140	AT3G62550
											AT5G62050				AT4G29050		AT4G15990		AT3G61050		AT3G12600	AT5G63800			AT2G32160	AT3G62560
											AT5G62150				AT4G29190		AT4G16000		AT3G61070		AT3G12630	AT5G63840			AT2G32190	AT3G62650
											AT5G62280				AT4G29210		AT4G16008		AT3G61160		AT3G12740	AT5G63850			AT2G32200	AT3G62770
											AT5G62290				AT4G29735		AT4G16130		AT3G61200		AT3G12760	AT5G63880			AT2G32210	AT3G62780
											AT5G62390				AT4G29740		AT4G16150		AT3G61210		AT3G12830	AT5G63930			AT2G32380	AT3G62950
											AT5G62480				AT4G29750		AT4G16180		AT3G61270		AT3G12910	AT5G63970			AT2G32520	AT3G63080
											AT5G62575				AT4G29810		AT4G16260		AT3G61280		AT3G12950	AT5G64190			AT2G32680	AT3G63400
											AT5G62720				AT4G29900		AT4G16430		AT3G61390		AT3G12980	AT5G64240			AT2G32700	AT3G66654
											AT5G62790				AT4G29950		AT4G16480		AT3G61460		AT3G13030	AT5G64360			AT2G32730	AT4G00240
											AT5G63180				AT4G29960		AT4G16520		AT3G61540		AT3G13050	AT5G64390			AT2G32800	AT4G00300
											AT5G63225				AT4G30060		AT4G16890		AT3G61630		AT3G13062	AT5G64410			AT2G32830	AT4G00355
											AT5G63260				AT4G30090		AT4G16950		AT3G61760		AT3G13080	AT5G64430			AT2G32870	AT4G00590
											AT5G63400				AT4G30260		AT4G16960		AT3G61790		AT3G13090	AT5G64500			AT2G32880	AT4G00750
											AT5G63470				AT4G30500		AT4G16990		AT3G61800		AT3G13100	AT5G64860			AT2G32885	AT4G00752
											AT5G63490				AT4G30640		AT4G17010		AT3G61860		AT3G13235	AT5G64880			AT2G32900	AT4G00780
											AT5G63790				AT4G30690		AT4G17070		AT3G61900		AT3G13310	AT5G64990			AT2G33020	AT4G00800
											AT5G63905				AT4G30920		AT4G17230		AT3G62150		AT3G13330	AT5G65050			AT2G33051	AT4G00960
											AT5G64000				AT4G31040		AT4G17245		AT3G62370		AT3G13380	AT5G65090			AT2G33080	AT4G00975
											AT5G64010				AT4G31050		AT4G17250		AT3G62550		AT3G13430	AT5G65110			AT2G33110	AT4G01000
											AT5G64100				AT4G31130		AT4G17270		AT3G62590		AT3G13433	AT5G65440			AT2G33120	AT4G01090
											AT5G64120				AT4G31550		AT4G17486		AT3G62650		AT3G13437	AT5G65620			AT2G33150	AT4G01100
											AT5G64140				AT4G31800		AT4G17490		AT3G62660		AT3G13438	AT5G65670			AT2G33170	AT4G01210
											AT5G64190				AT4G31877		AT4G17660		AT3G62860		AT3G13450	AT5G65910			AT2G33220	AT4G01250
											AT5G64350				AT4G31950		AT4G17900		AT3G63080		AT3G13610	AT5G65960			AT2G33290	AT4G01400
											AT5G64380				AT4G32040		AT4G17970		AT3G63380		AT3G13720	AT5G66030			AT2G33390	AT4G01480
											AT5G64430				AT4G32060		AT4G18140		AT3G63420		AT3G13770	AT5G66200			AT2G33470	AT4G01610
											AT5G64660				AT4G32180		AT4G18170		AT3G66654		AT3G13790	AT5G66350			AT2G33490	AT4G01740
											AT5G64750				AT4G32280		AT4G18195		AT4G00240		AT3G13870	AT5G66790			AT2G33510	AT4G01850
											AT5G64760				AT4G32285		AT4G18197		AT4G00300		AT3G13910	AT5G66880			AT2G33580	AT4G01910
											AT5G64780				AT4G32470		AT4G18205		AT4G00330		AT3G13950	AT5G67340			AT2G33630	AT4G01920
											AT5G64800				AT4G32870		AT4G18250		AT4G00355		AT3G14050	AT5G67420			AT2G33710	AT4G01940
											AT5G64813				AT4G33050		AT4G18340		AT4G00450		AT3G14090	ATMG00150			AT2G33740	AT4G02030
											AT5G65050				AT4G33300		AT4G18430		AT4G00700		AT3G14130				AT2G33810	AT4G02050
											AT5G65090				AT4G33430		AT4G18540		AT4G00800		AT3G14180				AT2G33830	AT4G02230
											AT5G65140				AT4G33510		AT4G18880		AT4G00970		AT3G14280				AT2G34040	AT4G02330
											AT5G65210				AT4G33620		AT4G18890		AT4G01010		AT3G14290				AT2G34250	AT4G02340
											AT5G65360				AT4G33910		AT4G19160		AT4G01400		AT3G14310				AT2G34430	AT4G02350
											AT5G65440				AT4G34030		AT4G19180		AT4G01430		AT3G14430				AT2G34470	AT4G02370
											AT5G65650				AT4G34110		AT4G19185		AT4G01610		AT3G14460				AT2G34690	AT4G02450
											AT5G65660				AT4G34150		AT4G19390		AT4G01670		AT3G14470				AT2G34940	AT4G02480
											AT5G66120				AT4G34180		AT4G19420		AT4G01720		AT3G14620				AT2G35050	AT4G02550
											AT5G66130				AT4G34270		AT4G19640		AT4G01740		AT3G14830				AT2G35060	AT4G02570
											AT5G66200				AT4G34370		AT4G19660		AT4G01750		AT3G14840				AT2G35070	AT4G02580
											AT5G66290				AT4G34390		AT4G19700		AT4G01940		AT3G15040				AT2G35110	AT4G02880
											AT5G66420				AT4G34460		AT4G19860		AT4G02050		AT3G15070				AT2G35240	AT4G02930
											AT5G66510				AT4G34480		AT4G19870		AT4G02080		AT3G15160				AT2G35320	AT4G02980
											AT5G66580				AT4G34500		AT4G19880		AT4G02340		AT3G15260				AT2G35590	AT4G03030
											AT5G66590				AT4G34700		AT4G19970		AT4G02350		AT3G15355				AT2G35650	AT4G03080
											AT5G66650				AT4G35020		AT4G19990		AT4G02370		AT3G15356				AT2G35680	AT4G03110
											AT5G66658				AT4G35180		AT4G20000		AT4G02380		AT3G15358				AT2G35690	AT4G03510
											AT5G66860				AT4G35220		AT4G20110		AT4G02480		AT3G15390				AT2G35810	AT4G03530
											AT5G67080				AT4G35310		AT4G20330		AT4G02550		AT3G15430				AT2G35930	AT4G03550
											AT5G67310				AT4G35600		AT4G20362		AT4G02570		AT3G15518				AT2G35980	AT4G03560
											AT5G67520				AT4G35750		AT4G20410		AT4G02660		AT3G15536				AT2G36060	AT4G03920
											AT5G67590				AT4G35780		AT4G20780		AT4G02740		AT3G15580				AT2G36220	AT4G04105
											ATCG00210				AT4G35790		AT4G20830		AT4G03030		AT3G15630				AT2G36305	AT4G04110
											ATCG00230				AT4G35830		AT4G21120		AT4G03115		AT3G15710				AT2G36310	AT4G04180
											ATCG00370				AT4G36040		AT4G21150		AT4G03420		AT3G15730				AT2G36320	AT4G04220
											ATCG00400				AT4G36050		AT4G21390		AT4G03460		AT3G15760				AT2G36330	AT4G04280
											ATCG00410				AT4G36090		AT4G21400		AT4G03510		AT3G15770				AT2G36360	AT4G04560
											ATMG00110				AT4G36150		AT4G21450		AT4G03530		AT3G15930				AT2G36400	AT4G04695
											ATMG00560				AT4G36210		AT4G21510		AT4G03560		AT3G15970				AT2G36420	AT4G04710
											ATMG00570				AT4G36410		AT4G21534		AT4G03920		AT3G15980				AT2G36430	AT4G04720
											ATMG00670				AT4G36450		AT4G21540		AT4G04110		AT3G16030				AT2G36470	AT4G04790
											ATMG00690				AT4G36480		AT4G21560		AT4G04220		AT3G16510				AT2G36500	AT4G04910
											ATMG00730				AT4G36500		AT4G21810		AT4G04223		AT3G16565				AT2G36580	AT4G04925
															AT4G36550		AT4G21840		AT4G04330		AT3G16700				AT2G36670	AT4G04950
															AT4G36670		AT4G21850		AT4G04480		AT3G16720				AT2G36680	AT4G04972
															AT4G36760		AT4G21920		AT4G04490		AT3G16740				AT2G36690	AT4G05060
															AT4G36790		AT4G21980		AT4G04510		AT3G16785				AT2G36770	AT4G05070
															AT4G36970		AT4G22030		AT4G04720		AT3G16830				AT2G36900	AT4G05150
															AT4G37010		AT4G22220		AT4G04740		AT3G16990				AT2G37110	AT4G05497
															AT4G37190		AT4G22305		AT4G04800		AT3G17020				AT2G37120	AT4G05530
															AT4G37290		AT4G22330		AT4G04860		AT3G17100				AT2G37130	AT4G05540
															AT4G37370		AT4G22530		AT4G04925		AT3G17205				AT2G37150	AT4G06558
															AT4G37390		AT4G22540		AT4G04960		AT3G17410				AT2G37160	AT4G06588
															AT4G37640		AT4G22670		AT4G04972		AT3G17420				AT2G37200	AT4G06622
															AT4G38260		AT4G22690		AT4G05060		AT3G17690				AT2G37430	AT4G06624
															AT4G38470		AT4G22710		AT4G05070		AT3G17700				AT2G37470	AT4G06642
															AT4G38540		AT4G22780		AT4G05120		AT3G17880				AT2G37520	AT4G06654
															AT4G38550		AT4G22980		AT4G05150		AT3G17940				AT2G37678	AT4G06698
															AT4G38580		AT4G23030		AT4G05330		AT3G18020				AT2G37680	AT4G06704
															AT4G38630		AT4G23040		AT4G05460		AT3G18035				AT2G37710	AT4G07810
															AT4G38790		AT4G23140		AT4G06558		AT3G18080				AT2G37820	AT4G07850
															AT4G38932		AT4G23150		AT4G06595		AT3G18250				AT2G37840	AT4G07874
															AT4G39030		AT4G23160		AT4G06642		AT3G18270				AT2G37920	AT4G07965
															AT4G39070		AT4G23170		AT4G06697		AT3G18370				AT2G37940	AT4G08000
															AT4G39090		AT4G23180		AT4G07810		AT3G18440				AT2G37950	AT4G08040
															AT4G39230		AT4G23190		AT4G08330		AT3G18690				AT2G37980	AT4G08290
															AT4G39270		AT4G23215		AT4G08340		AT3G18820				AT2G38000	AT4G08460
															AT4G39390		AT4G23220		AT4G08470		AT3G18830				AT2G38020	AT4G08480
															AT4G39580		AT4G23230		AT4G08480		AT3G18860				AT2G38130	AT4G08520
															AT4G39640		AT4G23270		AT4G08555		AT3G18930				AT2G38290	AT4G08580
															AT4G39820		AT4G23280		AT4G08850		AT3G19010				AT2G38400	AT4G08600
															AT4G39830		AT4G23310		AT4G08860		AT3G19190				AT2G38410	AT4G08680
															AT4G39890		AT4G23450		AT4G09020		AT3G19260				AT2G38470	AT4G08750
															AT4G39910		AT4G23460		AT4G09370		AT3G19400				AT2G38550	AT4G08810
															AT4G40042		AT4G23470		AT4G09432		AT3G19420				AT2G38790	AT4G08850
															AT5G01010		AT4G23550		AT4G09570		AT3G19460				AT2G38860	AT4G08860
															AT5G01430		AT4G23610		AT4G09770		AT3G19490				AT2G38960	AT4G08920
															AT5G01450		AT4G23650		AT4G10110		AT3G19540				AT2G39000	AT4G09300
															AT5G01542		AT4G23700		AT4G10610		AT3G19553				AT2G39030	AT4G09320
															AT5G01560		AT4G23710		AT4G10730		AT3G19580				AT2G39050	AT4G09425
															AT5G01620		AT4G23810		AT4G10790		AT3G19640				AT2G39100	AT4G09595
															AT5G01750		AT4G23850		AT4G10930		AT3G19770				AT2G39200	AT4G09770
															AT5G01800		AT4G24040		AT4G10970		AT3G19870				AT2G39210	AT4G10000
															AT5G01950		AT4G24060		AT4G10980		AT3G19895				AT2G39260	AT4G10080
															AT5G01980		AT4G24160		AT4G10990		AT3G19930				AT2G39270	AT4G10320
															AT5G01990		AT4G24230		AT4G11000		AT3G19990				AT2G39350	AT4G10500
															AT5G02010		AT4G24390		AT4G11070		AT3G20050				AT2G39360	AT4G10730
															AT5G02020		AT4G24400		AT4G11170		AT3G20080				AT2G39400	AT4G10790
															AT5G02040		AT4G24550		AT4G11260		AT3G20250				AT2G39480	AT4G10840
															AT5G02150		AT4G24690		AT4G11300		AT3G20410				AT2G39530	AT4G10930
															AT5G02160		AT4G24730		AT4G11470		AT3G20420				AT2G39550	AT4G10980
															AT5G02290		AT4G24920		AT4G11530		AT3G20510				AT2G39630	AT4G10990
															AT5G02780		AT4G24970		AT4G11670		AT3G20630				AT2G39660	AT4G11150
															AT5G03020		AT4G24990		AT4G11740		AT3G20770				AT2G39705	AT4G11260
															AT5G03320		AT4G25030		AT4G11850		AT3G20920				AT2G39780	AT4G11270
															AT5G03330		AT4G25070		AT4G11890		AT3G20960				AT2G39920	AT4G11280
															AT5G03455		AT4G25110		AT4G11900		AT3G21080				AT2G39960	AT4G11300
															AT5G03460		AT4G25350		AT4G11910		AT3G21140				AT2G39980	AT4G11360
															AT5G03470		AT4G25360		AT4G12010		AT3G21295				AT2G40000	AT4G11470
															AT5G03540		AT4G25515		AT4G12020		AT3G21520				AT2G40095	AT4G11530
															AT5G03630		AT4G25720		AT4G12040		AT3G21630				AT2G40110	AT4G11690
															AT5G03700		AT4G25940		AT4G12070		AT3G21640				AT2G40113	AT4G11840
															AT5G03730		AT4G25970		AT4G12120		AT3G21780				AT2G40140	AT4G11860
															AT5G04020		AT4G26060		AT4G12300		AT3G21781				AT2G40180	AT4G11890
															AT5G04040		AT4G26070		AT4G12460		AT3G21790				AT2G40410	AT4G11900
															AT5G04170		AT4G26090		AT4G12570		AT3G21810				AT2G40420	AT4G12010
															AT5G04190		AT4G26120		AT4G12590		AT3G22060				AT2G40600	AT4G12020
															AT5G04220		AT4G26160		AT4G12720		AT3G22160				AT2G40620	AT4G12120
															AT5G04235		AT4G26200		AT4G12900		AT3G22190				AT2G40740	AT4G12460
															AT5G04560		AT4G26270		AT4G13030		AT3G22220				AT2G40810	AT4G12570
															AT5G04720		AT4G26400		AT4G13640		AT3G22260				AT2G40880	AT4G12590
															AT5G04750		AT4G26550		AT4G13820		AT3G22290				AT2G40935	AT4G12650
															AT5G04770		AT4G26810		AT4G13830		AT3G22400				AT2G40940	AT4G12735
															AT5G04910		AT4G26910		AT4G13890		AT3G22430				AT2G40970	AT4G12850
															AT5G04930		AT4G27090		AT4G14070		AT3G22460				AT2G41100	AT4G13030
															AT5G05010		AT4G27260		AT4G14270		AT3G22600				AT2G41110	AT4G13250
															AT5G05090		AT4G27440		AT4G14365		AT3G22620				AT2G41220	AT4G13395
															AT5G05100		AT4G27450		AT4G14370		AT3G22845				AT2G41410	AT4G13430
															AT5G05230		AT4G27460		AT4G14430		AT3G22930				AT2G41420	AT4G13640
															AT5G05300		AT4G27470		AT4G14450		AT3G22942				AT2G41430	AT4G13810
															AT5G05320		AT4G27500		AT4G14610		AT3G22980				AT2G41440	AT4G13820
															AT5G05460		AT4G27740		AT4G14615		AT3G23010				AT2G41470	AT4G13850
															AT5G05550		AT4G27760		AT4G14710		AT3G23030				AT2G41490	AT4G13890
															AT5G05660		AT4G27870		AT4G14746		AT3G23230				AT2G41530	AT4G14070
															AT5G05690		AT4G28085		AT4G15070		AT3G23280				AT2G41560	AT4G14270
															AT5G05730		AT4G28270		AT4G15233		AT3G23330				AT2G41640	AT4G14420
															AT5G05750		AT4G28300		AT4G15236		AT3G23480				AT2G41710	AT4G14430
															AT5G05850		AT4G28350		AT4G15260		AT3G23540				AT2G41730	AT4G14500
															AT5G05930		AT4G28400		AT4G15400		AT3G23550				AT2G41740	AT4G14610
															AT5G05950		AT4G28460		AT4G15417		AT3G23560				AT2G41780	AT4G14660
															AT5G06140		AT4G28490		AT4G15420		AT3G23600				AT2G41835	AT4G14716
															AT5G06240		AT4G28652		AT4G15475		AT3G24090				AT2G41880	AT4G14720
															AT5G06260		AT4G28703		AT4G15760		AT3G24503				AT2G42160	AT4G14746
															AT5G06560		AT4G28710		AT4G15910		AT3G24900				AT2G42280	AT4G14800
															AT5G06570		AT4G28770		AT4G15955		AT3G24927				AT2G42360	AT4G14820
															AT5G06690		AT4G29040		AT4G15975		AT3G25010				AT2G42390	AT4G14880
															AT5G06750		AT4G29050		AT4G15990		AT3G25020				AT2G42400	AT4G14930
															AT5G06860		AT4G29190		AT4G16000		AT3G25070				AT2G42520	AT4G15010
															AT5G06865		AT4G29210		AT4G16008		AT3G25210				AT2G42670	AT4G15070
															AT5G07100		AT4G29560		AT4G16130		AT3G25510				AT2G42680	AT4G15093
															AT5G07130		AT4G29735		AT4G16144		AT3G25610				AT2G42790	AT4G15236
															AT5G07150		AT4G29740		AT4G16150		AT3G25870				AT2G42890	AT4G15260
															AT5G07300		AT4G29750		AT4G16180		AT3G25882				AT2G42950	AT4G15420
															AT5G07360		AT4G29810		AT4G16190		AT3G25910				AT2G43000	AT4G15760
															AT5G07470		AT4G29820		AT4G16250		AT3G26020				AT2G43050	AT4G15990
															AT5G07770		AT4G29900		AT4G16330		AT3G26090				AT2G43060	AT4G16000
															AT5G07790		AT4G29950		AT4G16480		AT3G26115				AT2G43080	AT4G16008
															AT5G07820		AT4G29960		AT4G16520		AT3G26165				AT2G43140	AT4G16130
															AT5G07860		AT4G30060		AT4G16670		AT3G26170				AT2G43160	AT4G16162
															AT5G07870		AT4G30090		AT4G16710		AT3G26180				AT2G43210	AT4G16180
															AT5G07910		AT4G30500		AT4G16770		AT3G26200				AT2G43350	AT4G16190
															AT5G07960		AT4G30550		AT4G16850		AT3G26210				AT2G43400	AT4G16280
															AT5G08120		AT4G30600		AT4G16870		AT3G26220				AT2G43540	AT4G16420
															AT5G08240		AT4G30640		AT4G16892		AT3G26340				AT2G43570	AT4G16520
															AT5G08300		AT4G30690		AT4G16920		AT3G26440				AT2G43590	AT4G16780
															AT5G08335		AT4G30850		AT4G16950		AT3G26500				AT2G43620	AT4G16830
															AT5G08380		AT4G30920		AT4G16960		AT3G26600				AT2G43640	AT4G16890
															AT5G08520		AT4G31050		AT4G17070		AT3G26670				AT2G43680	AT4G16892
															AT5G08660		AT4G31170		AT4G17080		AT3G26680				AT2G43760	AT4G16900
															AT5G08790		AT4G31180		AT4G17230		AT3G26720				AT2G43790	AT4G16960
															AT5G09630		AT4G31420		AT4G17245		AT3G26740				AT2G43810	AT4G16990
															AT5G09900		AT4G31510		AT4G17250		AT3G26830				AT2G43820	AT4G17070
															AT5G10190		AT4G31550		AT4G17270		AT3G26840				AT2G43850	AT4G17080
															AT5G10560		AT4G31800		AT4G17486		AT3G26910				AT2G43970	AT4G17230
															AT5G10570		AT4G31950		AT4G17490		AT3G26980				AT2G44065	AT4G17245
															AT5G10600		AT4G32040		AT4G17660		AT3G27530				AT2G44080	AT4G17486
															AT5G10610		AT4G32060		AT4G17900		AT3G27560				AT2G44100	AT4G17640
															AT5G10695		AT4G32130		AT4G18120		AT3G27610				AT2G44130	AT4G17660
															AT5G10760		AT4G32160		AT4G18170		AT3G27890				AT2G44140	AT4G17830
															AT5G10780		AT4G32180		AT4G18195		AT3G27997				AT2G44180	AT4G17900
															AT5G10790		AT4G32280		AT4G18197		AT3G28340				AT2G44290	AT4G18050
															AT5G10860		AT4G32285		AT4G18205		AT3G28450				AT2G44360	AT4G18060
															AT5G10870		AT4G32300		AT4G18250		AT3G28480				AT2G44370	AT4G18170
															AT5G11000		AT4G32850		AT4G18520		AT3G28510				AT2G44380	AT4G18210
															AT5G11140		AT4G32870		AT4G18530		AT3G28540				AT2G44410	AT4G18340
															AT5G11250		AT4G32910		AT4G18540		AT3G28580				AT2G44420	AT4G18440
															AT5G11390		AT4G33050		AT4G18830		AT3G28690				AT2G44480	AT4G18520
															AT5G11580		AT4G33210		AT4G18880		AT3G28715				AT2G44490	AT4G18880
															AT5G11670		AT4G33300		AT4G18890		AT3G28850				AT2G44525	AT4G18890
															AT5G11720		AT4G33430		AT4G18910		AT3G28860				AT2G44530	AT4G18930
															AT5G11850		AT4G33510		AT4G18975		AT3G28890				AT2G44610	AT4G18990
															AT5G11910		AT4G33620		AT4G18990		AT3G28930				AT2G44660	AT4G19160
															AT5G11970		AT4G33910		AT4G19003		AT3G28940				AT2G44730	AT4G19180
															AT5G12390		AT4G34030		AT4G19090		AT3G28945				AT2G44850	AT4G19190
															AT5G12420		AT4G34100		AT4G19160		AT3G28950				AT2G44890	AT4G19200
															AT5G12480		AT4G34110		AT4G19185		AT3G29000				AT2G44995	AT4G19420
															AT5G12930		AT4G34150		AT4G19200		AT3G29034				AT2G45010	AT4G19660
															AT5G12940		AT4G34180		AT4G19370		AT3G29075				AT2G45070	AT4G19700
															AT5G13190		AT4G34270		AT4G19390		AT3G29170				AT2G45140	AT4G19840
															AT5G13300		AT4G34370		AT4G19420		AT3G29240				AT2G45170	AT4G19860
															AT5G13320		AT4G34390		AT4G19640		AT3G29310				AT2G45200	AT4G19865
															AT5G13570		AT4G34412		AT4G19700		AT3G29400				AT2G45240	AT4G19870
															AT5G13860		AT4G34450		AT4G19840		AT3G30120				AT2G45330	AT4G19970
															AT5G14120		AT4G34460		AT4G19860		AT3G30790				AT2G45360	AT4G19990
															AT5G14270		AT4G34480		AT4G19880		AT3G41768				AT2G45500	AT4G20400
															AT5G14360		AT4G34790		AT4G19970		AT3G42150				AT2G45510	AT4G20410
															AT5G14480		AT4G35020		AT4G19990		AT3G42790				AT2G45540	AT4G21105
															AT5G14730		AT4G35180		AT4G20000		AT3G43300				AT2G45630	AT4G21120
															AT5G14930		AT4G35310		AT4G20110		AT3G43520				AT2G45660	AT4G21150
															AT5G15080		AT4G35480		AT4G20140		AT3G43670				AT2G45760	AT4G21360
															AT5G15160		AT4G35600		AT4G20330		AT3G44326				AT2G45790	AT4G21450
															AT5G15860		AT4G35750		AT4G20410		AT3G44340				AT2G45850	AT4G21510
															AT5G15870		AT4G35780		AT4G20720		AT3G44350				AT2G45910	AT4G21534
															AT5G16110		AT4G35830		AT4G20780		AT3G44400				AT2G45980	AT4G21560
															AT5G16120		AT4G35870		AT4G20830		AT3G44670				AT2G46000	AT4G21730
															AT5G16150		AT4G36030		AT4G20930		AT3G44830				AT2G46020	AT4G21800
															AT5G16170		AT4G36040		AT4G21120		AT3G45040				AT2G46150	AT4G21810
															AT5G16180		AT4G36090		AT4G21230		AT3G45100				AT2G46180	AT4G21880
															AT5G16260		AT4G36140		AT4G21390		AT3G45260				AT2G46200	AT4G21926
															AT5G16370		AT4G36150		AT4G21400		AT3G45290				AT2G46220	AT4G21960
															AT5G16480		AT4G36210		AT4G21450		AT3G45300				AT2G46240	AT4G22220
															AT5G16550		AT4G36410		AT4G21500		AT3G45310				AT2G46260	AT4G22330
															AT5G16800		AT4G36480		AT4G21510		AT3G45330				AT2G46270	AT4G22540
															AT5G16820		AT4G36500		AT4G21534		AT3G45410				AT2G46330	AT4G22670
															AT5G16880		AT4G36550		AT4G21540		AT3G45590				AT2G46390	AT4G22960
															AT5G17330		AT4G36648		AT4G21560		AT3G45620				AT2G46400	AT4G22980
															AT5G17760		AT4G36670		AT4G21810		AT3G45730				AT2G46430	AT4G23040
															AT5G17880		AT4G36760		AT4G21920		AT3G45770				AT2G46440	AT4G23140
															AT5G17990		AT4G36790		AT4G21960		AT3G45860				AT2G46470	AT4G23180
															AT5G18110		AT4G36970		AT4G22030		AT3G45980				AT2G46490	AT4G23220
															AT5G18130		AT4G37290		AT4G22305		AT3G46000				AT2G46500	AT4G23230
															AT5G18150		AT4G37370		AT4G22330		AT3G46060				AT2G46550	AT4G23260
															AT5G18170		AT4G37390		AT4G22530		AT3G46090				AT2G46560	AT4G23450
															AT5G18210		AT4G37640		AT4G22710		AT3G46220				AT2G46600	AT4G23460
															AT5G18310		AT4G37900		AT4G22780		AT3G46280				AT2G46610	AT4G23470
															AT5G18360		AT4G38260		AT4G22960		AT3G46440				AT2G46620	AT4G23530
															AT5G18470		AT4G38470		AT4G22980		AT3G46510				AT2G46900	AT4G23610
															AT5G18480		AT4G38540		AT4G23040		AT3G46690				AT2G46940	AT4G23700
															AT5G18490		AT4G38550		AT4G23140		AT3G46930				AT2G47000	AT4G23760
															AT5G18525		AT4G38560		AT4G23160		AT3G47000				AT2G47130	AT4G23810
															AT5G18630		AT4G38630		AT4G23180		AT3G47010				AT2G47140	AT4G23880
															AT5G18640		AT4G38790		AT4G23190		AT3G47050				AT2G47190	AT4G24020
															AT5G18650		AT4G38932		AT4G23215		AT3G47090				AT2G47210	AT4G24040
															AT5G18750		AT4G39070		AT4G23220		AT3G47160				AT2G47390	AT4G24230
															AT5G18780		AT4G39090		AT4G23230		AT3G47210				AT2G47470	AT4G24350
															AT5G19010		AT4G39220		AT4G23270		AT3G47250				AT2G47640	AT4G24390
															AT5G19080		AT4G39230		AT4G23280		AT3G47300				AT2G47650	AT4G24400
															AT5G19120		AT4G39270		AT4G23320		AT3G47480				AT2G47680	AT4G24450
															AT5G19130		AT4G39390		AT4G23330		AT3G47530				AT2G47690	AT4G24490
															AT5G19140		AT4G39580		AT4G23450		AT3G47550				AT2G47700	AT4G24520
															AT5G19160		AT4G39610		AT4G23460		AT3G47570				AT2G47730	AT4G24550
															AT5G19230		AT4G39640		AT4G23530		AT3G47670				AT2G47760	AT4G24680
															AT5G19250		AT4G39670		AT4G23700		AT3G47700				AT2G47960	AT4G24690
															AT5G19330		AT4G39820		AT4G23810		AT3G47800				AT2G47980	AT4G24800
															AT5G19530		AT4G39830		AT4G23850		AT3G47810				AT2G48020	AT4G25110
															AT5G19690		AT4G39890		AT4G23880		AT3G47820				AT2G48030	AT4G25170
															AT5G19860		AT4G40042		AT4G23910		AT3G48020				AT2G48110	AT4G25350
															AT5G19930		AT4G40080		AT4G24040		AT3G48080				AT3G01050	AT4G25515
															AT5G19980		AT5G01010		AT4G24220		AT3G48090				AT3G01080	AT4G25650
															AT5G20000		AT5G01100		AT4G24230		AT3G48140				AT3G01130	AT4G25720
															AT5G20050		AT5G01210		AT4G24290		AT3G48170				AT3G01150	AT4G25835
															AT5G20250		AT5G01450		AT4G24390		AT3G48195				AT3G01170	AT4G25870
															AT5G20350		AT5G01540		AT4G24400		AT3G48380				AT3G01175	AT4G25880
															AT5G20400		AT5G01542		AT4G24550		AT3G48530				AT3G01290	AT4G25940
															AT5G20660		AT5G01560		AT4G24690		AT3G48630				AT3G01300	AT4G25970
															AT5G20990		AT5G01620		AT4G24730		AT3G48640				AT3G01310	AT4G26060
															AT5G21090		AT5G01750		AT4G24990		AT3G48650				AT3G01490	AT4G26070
															AT5G21170		AT5G01800		AT4G25030		AT3G48680				AT3G01590	AT4G26130
															AT5G22270		AT5G01950		AT4G25070		AT3G48750				AT3G01720	AT4G26160
															AT5G22290		AT5G01980		AT4G25110		AT3G48760				AT3G01750	AT4G26180
															AT5G22310		AT5G01990		AT4G25225		AT3G48780				AT3G01770	AT4G26260
															AT5G22350		AT5G02010		AT4G25350		AT3G48850				AT3G01830	AT4G26270
															AT5G22360		AT5G02020		AT4G25390		AT3G48860				AT3G01850	AT4G26380
															AT5G22520		AT5G02040		AT4G25515		AT3G48890				AT3G01910	AT4G26400
															AT5G22530		AT5G02150		AT4G25650		AT3G49060				AT3G01970	AT4G26430
															AT5G22920		AT5G02260		AT4G25720		AT3G49100				AT3G02040	AT4G26620
															AT5G23050		AT5G02290		AT4G25810		AT3G49310				AT3G02065	AT4G27010
															AT5G23210		AT5G02780		AT4G25835		AT3G49350				AT3G02070	AT4G27260
															AT5G23380		AT5G02820		AT4G25840		AT3G49370				AT3G02090	AT4G27270
															AT5G23510		AT5G03020		AT4G25900		AT3G49390				AT3G02340	AT4G27290
															AT5G23540		AT5G03090		AT4G25940		AT3G49490				AT3G02360	AT4G27450
															AT5G23575		AT5G03290		AT4G25970		AT3G49590				AT3G02420	AT4G27460
															AT5G23660		AT5G03320		AT4G26060		AT3G49725				AT3G02520	AT4G27470
															AT5G23670		AT5G03330		AT4G26070		AT3G49780				AT3G02550	AT4G27740
															AT5G24110		AT5G03455		AT4G26090		AT3G49790				AT3G02610	AT4G27745
															AT5G24210		AT5G03460		AT4G26160		AT3G49800				AT3G02630	AT4G27870
															AT5G24260		AT5G03470		AT4G26200		AT3G50010				AT3G02700	AT4G27880
															AT5G24270		AT5G03540		AT4G26270		AT3G50140				AT3G02710	AT4G28040
															AT5G24400		AT5G03700		AT4G26400		AT3G50210				AT3G02740	AT4G28220
															AT5G24450		AT5G03730		AT4G26550		AT3G50260				AT3G02770	AT4G28260
															AT5G24490		AT5G04020		AT4G26620		AT3G50280				AT3G02800	AT4G28270
															AT5G24540		AT5G04040		AT4G26910		AT3G50470				AT3G02840	AT4G28300
															AT5G24610		AT5G04170		AT4G27220		AT3G50480				AT3G03000	AT4G28470
															AT5G24620		AT5G04190		AT4G27260		AT3G50500				AT3G03020	AT4G28490
															AT5G24890		AT5G04220		AT4G27270		AT3G50550				AT3G03070	AT4G28510
															AT5G25050		AT5G04235		AT4G27460		AT3G50590				AT3G03150	AT4G28560
															AT5G25180		AT5G04250		AT4G27470		AT3G50650				AT3G03160	AT4G28652
															AT5G25190		AT5G04560		AT4G27500		AT3G50700				AT3G03180	AT4G28703
															AT5G25210		AT5G04720		AT4G27740		AT3G50740				AT3G03310	AT4G28860
															AT5G25250		AT5G04750		AT4G27745		AT3G50750				AT3G03330	AT4G28880
															AT5G25260		AT5G04780		AT4G27970		AT3G50770				AT3G03470	AT4G28970
															AT5G25265		AT5G04870		AT4G28085		AT3G50800				AT3G03490	AT4G29050
															AT5G25270		AT5G04910		AT4G28270		AT3G50810				AT3G03560	AT4G29190
															AT5G25350		AT5G04920		AT4G28300		AT3G50900				AT3G03570	AT4G29380
															AT5G25440		AT5G04930		AT4G28390		AT3G50930				AT3G03610	AT4G29560
															AT5G25540		AT5G05010		AT4G28490		AT3G50950				AT3G03640	AT4G29735
															AT5G25770		AT5G05090		AT4G28540		AT3G51000				AT3G03720	AT4G29750
															AT5G25790		AT5G05100		AT4G28570		AT3G51010				AT3G03740	AT4G29810
															AT5G25900		AT5G05190		AT4G28652		AT3G51050				AT3G03855	AT4G29950
															AT5G25910		AT5G05230		AT4G28710		AT3G51130				AT3G03870	AT4G29960
															AT5G25930		AT5G05300		AT4G28860		AT3G51160				AT3G04070	AT4G30090
															AT5G26170		AT5G05320		AT4G29010		AT3G51260				AT3G04080	AT4G30150
															AT5G26340		AT5G05440		AT4G29040		AT3G51330				AT3G04090	AT4G30260
															AT5G26690		AT5G05460		AT4G29050		AT3G51340				AT3G04181	AT4G30410
															AT5G26751		AT5G05550		AT4G29190		AT3G51390				AT3G04210	AT4G30640
															AT5G26920		AT5G05730		AT4G29210		AT3G51430				AT3G04220	AT4G30810
															AT5G27280		AT5G05750		AT4G29380		AT3G51440				AT3G04480	AT4G30870
															AT5G27320		AT5G05780		AT4G29420		AT3G51550				AT3G04580	AT4G31050
															AT5G27345		AT5G05850		AT4G29560		AT3G51610				AT3G04640	AT4G31180
															AT5G27380		AT5G05930		AT4G29790		AT3G51660				AT3G04670	AT4G31230
															AT5G27420		AT5G06140		AT4G29820		AT3G51670				AT3G04717	AT4G31240
															AT5G27430		AT5G06240		AT4G29900		AT3G51730				AT3G04720	AT4G31340
															AT5G27720		AT5G06260		AT4G30060		AT3G51890				AT3G04730	AT4G31380
															AT5G27750		AT5G06320		AT4G30280		AT3G51920				AT3G04740	AT4G31420
															AT5G27760		AT5G06560		AT4G30360		AT3G52200				AT3G04880	AT4G31510
															AT5G27830		AT5G06570		AT4G30370		AT3G52240				AT3G04910	AT4G31600
															AT5G27860		AT5G06750		AT4G30390		AT3G52400				AT3G04930	AT4G31810
															AT5G27920		AT5G06860		AT4G30550		AT3G52430				AT3G05000	AT4G32010
															AT5G27950		AT5G07100		AT4G30640		AT3G52450				AT3G05010	AT4G32060
															AT5G28770		AT5G07130		AT4G30660		AT3G52560				AT3G05090	AT4G32180
															AT5G28830		AT5G07150		AT4G30690		AT3G52570				AT3G05120	AT4G32280
															AT5G35080		AT5G07360		AT4G30850		AT3G52710				AT3G05160	AT4G32285
															AT5G35200		AT5G07440		AT4G30870		AT3G52748				AT3G05200	AT4G32470
															AT5G35370		AT5G07580		AT4G30910		AT3G52850				AT3G05230	AT4G32480
															AT5G35690		AT5G07770		AT4G31050		AT3G53090				AT3G05250	AT4G32530
															AT5G35735		AT5G07790		AT4G31170		AT3G53120				AT3G05280	AT4G32680
															AT5G36925		AT5G07820		AT4G31230		AT3G53150				AT3G05360	AT4G32760
															AT5G36930		AT5G07860		AT4G31420		AT3G53180				AT3G05500	AT4G32850
															AT5G37070		AT5G07870		AT4G31500		AT3G53270				AT3G05530	AT4G32870
															AT5G37490		AT5G07910		AT4G31510		AT3G53310				AT3G05580	AT4G32950
															AT5G37600		AT5G07960		AT4G31550		AT3G53340				AT3G05650	AT4G33210
															AT5G37710		AT5G08120		AT4G31800		AT3G53410				AT3G05660	AT4G33360
															AT5G37740		AT5G08160		AT4G31950		AT3G53490				AT3G05675	AT4G33510
															AT5G37780		AT5G08240		AT4G32040		AT3G53610				AT3G05710	AT4G33910
															AT5G37930		AT5G08260		AT4G32180		AT3G53730				AT3G05760	AT4G33940
															AT5G38210		AT5G08290		AT4G32285		AT3G53780				AT3G05830	AT4G33990
															AT5G38250		AT5G08300		AT4G32300		AT3G53800				AT3G05930	AT4G34030
															AT5G38310		AT5G08335		AT4G32340		AT3G53810				AT3G05970	AT4G34100
															AT5G38630		AT5G08380		AT4G32680		AT3G53970				AT3G06050	AT4G34110
															AT5G38710		AT5G08520		AT4G32760		AT3G53990				AT3G06070	AT4G34138
															AT5G38850		AT5G08660		AT4G32840		AT3G54010				AT3G06110	AT4G34200
															AT5G38860		AT5G08790		AT4G32850		AT3G54085				AT3G06170	AT4G34250
															AT5G38895		AT5G09290		AT4G32870		AT3G54100				AT3G06210	AT4G34270
[truncated: 2,576 more rows]
