# Supplementary material for: Identification and characterisation of hypomethylated DNA loci controlling quantitative resistance in Arabidopsis
Source: eLife. 2019 Jan 4;8:e40655. doi: 10.7554/eLife.40655 (PMC6342528; doi:10.7554/eLife.40655)
Supplement: Figure 3—source data 1. [file elife-40655-fig3-data1.xlsx]

## Sheet: Figure 3c
Figure 3c: Frequency of gene annotations for distincly regulated gene clusters for each epiQTL. Clusters represent distinct expression profiles between epiRILs.
		epiQTL1	epiQTL2	epiQTL4	epiQTL5
Cluster I 1	TEs/TE-related genes	19	23	18	7
	Annotated plant proteins	0	2	0	0
	Unknown plant proteins	2	1	1	0
		epiQTL1	epiQTL2	epiQTL4	epiQTL5
Cluster II 2	TEs/TE-related genes	1	3	1	0
	Annotated plant proteins	114	74	32	8
	Unknown plant proteins	27	9	6	3
1 augmented expresson after Hpa inoculation correlates with hypo-methylated haplotype of ddm1-2 mutant.
2 augmented expresson after Hpa inoculation does not correlate with hypo-methylated haplotype of ddm1-2 mutant.
