# Supplementary material for: Identification and characterisation of hypomethylated DNA loci controlling quantitative resistance in Arabidopsis
Source: eLife. 2019 Jan 4;8:e40655. doi: 10.7554/eLife.40655 (PMC6342528; doi:10.7554/eLife.40655)
Supplement: Supplementary file 1. — (S1) Distribution of 126 DMR markers for Wt and ddm1-2 haplotypes in all 123 epiRILs. (S2) Linkage between shared transposition events (STEs) in the epiQTL of Chromosome 1 and Hpa resistance. (S3) Differentially expressed genes between all epiRIL/treatment/time-point combinations. (S4) Genes showing statistically significant induction by Hpa in the Wt and/or Hpa-resistant epiRILs. (S5) Hpa-inducible genes displaying constitutively up-regulated expression in one or more Hpa-resistant epiRILs. (Group 1). (S6) Hpa-inducible genes displaying augmented induction in one or more Hpa-resistant epiRILs. (Group 2). (S7) Percentages of genes in Group 2 showing statistically signigicant interaction effect between epigenotype and treatment. (S8) Defence-related GO terms showing significant enrichment in Group 1 and/or Group 2 genes. (S9) Hpa-inducible genes whithin epiQTL intervals that do not show positive correlation between augmented induction and DNA hypo-methylation (trans-regulated). (S10) Hpa-inducible genes whithin epiQTL intervals that show positive correlation between augmented induction and DNA hypo-methylation (cis-regulated). [file elife-40655-supp1.xlsx]

## Sheet: Legend
Supplementary datasets:
S1:	Distribution of 126 DMR markers for Wt and ddm1-2 haplotypes in all 123 epiRILs
S2:	Linkage between shared transposition events (STEs) in the epiQTL of Chromosome 1 and Hpa resistance.
S3:	Differentially expressed genes between all epiRIL/treatment/time-point combinations
S4:	Genes showing statistically significant induction by Hpa in the Wt and/or Hpa-resistant epiRILs
S5:	Hpa-inducible genes displaying constitutively up-regulated expression in one or more Hpa-resistant epiRILs. (Group 1)
S6:	Hpa-inducible genes displaying augmented induction in one or more Hpa-resistant epiRILs. (Group 2)
S7:	Percentages of genes in Group 2 showing statistically signigicant interaction effect between epigenotype and treatment
S8:	Defence-related GO terms showing significant enrichment in Group 1 and/or Group 2 genes.
S9:	Hpa-inducible genes whithin epiQTL intervals that do not show positive correlation between augmented induction and DNA hypo-methylation (trans-regulated)
S10:	Hpa-inducible genes whithin epiQTL intervals that show positive correlation between augmented induction and DNA hypo-methylation (cis-regulated)

## Sheet: S1
Distribution of Wt or ddm1-2 haplotypes for 126 DMR markers in the population of 123 epiRILs
note: epiRILs are ordered by Hpa resistance index (RI), from lowest (left) to highest (right)
				epiRIL:		epiRIL394	epiRIL252	epiRIL408	epiRIL170	epiRIL400	epiRIL497	epiRIL493	epiRIL53	epiRIL195	epiRIL495	epiRIL344	epiRIL480	epiRIL410	epiRIL434	epiRIL20	epiRIL473	epiRIL561	epiRIL393	epiRIL62	epiRIL333	epiRIL260	epiRIL183	epiRIL538	epiRIL570	epiRIL164	epiRIL326	epiRIL69	epiRIL471	epiRIL340	epiRIL108	epiRIL94	epiRIL238	epiRIL361	epiRIL262	epiRIL366	epiRIL172	epiRIL169	epiRIL215	epiRIL112	epiRIL166	epiRIL439	epiRIL159	epiRIL36	epiRIL539
				RI:		1.96571	2.25806	2.29798	2.3	2.3066	2.31507	2.32692	2.33166	2.34296	2.34842	2.34884	2.35119	2.35745	2.35887	2.36066	2.36444	2.36493	2.36866	2.37561	2.37662	2.37945	2.38916	2.4	2.40097	2.40476	2.40659	2.40722	2.40807	2.40828	2.41827	2.42473	2.43056	2.44086	2.45238	2.45729	2.45909	2.45918	2.46835	2.46939	2.46939	2.46957	2.46961	2.46995	2.47059
marker	chr	start_bp	stop_bp		cM
MM1	1	4330608	4332127	1519	0	Wt	Wt	Wt	Wt	Wt	Wt	Wt	Wt	Wt	Wt	Wt	Wt	Wt	Wt	Wt	Wt	ddm1-2	Wt	Wt	Wt	Wt	ddm1-2	Wt	Wt	ddm1-2	Wt	Wt	Wt	ddm1-2	Wt	ddm1-2	Wt	ddm1-2	Wt	Wt	ddm1-2	Wt	Wt	Wt	Wt	Wt	Wt	Wt	Wt
MM2	1	6010670	6014046	3376	1.7292	Wt	Wt	Wt	Wt	Wt	Wt	Wt	Wt	Wt	Wt	Wt	Wt	Wt	Wt	Wt	Wt	ddm1-2	Wt	Wt	Wt	Wt	ddm1-2	Wt	Wt	ddm1-2	Wt	Wt	Wt	ddm1-2	Wt	ddm1-2	Wt	ddm1-2	Wt	Wt	ddm1-2	Wt	Wt	Wt	Wt	Wt	Wt	Wt	Wt
MM4	1	7430013	7432327	2314	11.7312	Wt	Wt	Wt	Wt	Wt	Wt	Wt	Wt	Wt	Wt	Wt	Wt	Wt	Wt	Wt	Wt	Wt	Wt	Wt	Wt	Wt	ddm1-2	Wt	Wt	ddm1-2	Wt	Wt	Wt	ddm1-2	Wt	ddm1-2	Wt	ddm1-2	ddm1-2	Wt	Wt	Wt	Wt	Wt	Wt	Wt	Wt	Wt	Wt
MM5	1	8490912	8491812	900	13.4604	Wt	Wt	Wt	Wt	Wt	Wt	Wt	Wt	Wt	Wt	Wt	Wt	Wt	Wt	Wt	Wt	Wt	Wt	Wt	Wt	Wt	ddm1-2	Wt	Wt	ddm1-2	Wt	Wt	Wt	Wt	Wt	ddm1-2	Wt	ddm1-2	ddm1-2	Wt	Wt	ddm1-2	Wt	Wt	Wt	Wt	Wt	Wt	Wt
MM7	1	8802001	8802718	717	16.4465	Wt	Wt	Wt	Wt	Wt	Wt	Wt	Wt	Wt	Wt	Wt	Wt	Wt	Wt	Wt	Wt	Wt	Wt	Wt	Wt	Wt	ddm1-2	Wt	Wt	ddm1-2	Wt	Wt	Wt	Wt	Wt	Wt	Wt	ddm1-2	ddm1-2	Wt	ddm1-2	ddm1-2	Wt	Wt	Wt	Wt	ddm1-2	Wt	Wt
MM10	1	8931527	8932390	863	18.1757	Wt	Wt	Wt	Wt	Wt	Wt	Wt	Wt	Wt	Wt	Wt	Wt	Wt	Wt	Wt	Wt	Wt	Wt	Wt	Wt	Wt	ddm1-2	Wt	Wt	Wt	Wt	Wt	Wt	Wt	Wt	Wt	Wt	ddm1-2	ddm1-2	Wt	ddm1-2	ddm1-2	Wt	Wt	Wt	Wt	ddm1-2	Wt	Wt
MM11	1	9574192	9575402	1210	23.228	Wt	Wt	Wt	Wt	Wt	Wt	Wt	Wt	Wt	Wt	Wt	Wt	Wt	Wt	Wt	Wt	Wt	Wt	Wt	Wt	Wt	Wt	Wt	Wt	Wt	Wt	Wt	Wt	Wt	Wt	Wt	Wt	ddm1-2	Wt	Wt	ddm1-2	ddm1-2	Wt	Wt	Wt	Wt	ddm1-2	Wt	Wt
MM12	1	9928563	9929288	725	23.7851	Wt	Wt	Wt	Wt	Wt	ddm1-2	Wt	Wt	Wt	Wt	Wt	Wt	Wt	Wt	Wt	Wt	Wt	Wt	Wt	Wt	Wt	Wt	Wt	Wt	Wt	Wt	Wt	Wt	Wt	Wt	Wt	Wt	ddm1-2	Wt	Wt	ddm1-2	ddm1-2	Wt	Wt	Wt	Wt	ddm1-2	Wt	Wt
MM17	1	11096930	11100776	3846	26.1316	Wt	Wt	Wt	Wt	Wt	ddm1-2	Wt	Wt	Wt	Wt	Wt	Wt	Wt	Wt	Wt	Wt	Wt	Wt	Wt	Wt	Wt	Wt	Wt	Wt	Wt	Wt	Wt	Wt	Wt	Wt	Wt	Wt	ddm1-2	Wt	Wt	Wt	ddm1-2	Wt	Wt	Wt	Wt	ddm1-2	Wt	Wt
MM20	1	11322817	11324251	1434	26.6886	Wt	Wt	Wt	Wt	Wt	ddm1-2	Wt	Wt	Wt	Wt	Wt	Wt	Wt	Wt	Wt	Wt	Wt	Wt	Wt	Wt	Wt	ddm1-2	Wt	Wt	Wt	Wt	Wt	Wt	Wt	Wt	Wt	Wt	ddm1-2	Wt	Wt	Wt	ddm1-2	Wt	Wt	Wt	Wt	ddm1-2	Wt	Wt
MM25	1	12273272	12276406	3134	29.0351	Wt	Wt	Wt	Wt	Wt	Wt	Wt	Wt	Wt	Wt	Wt	Wt	Wt	Wt	Wt	Wt	Wt	Wt	Wt	Wt	Wt	ddm1-2	Wt	Wt	Wt	Wt	Wt	Wt	Wt	Wt	Wt	Wt	ddm1-2	Wt	Wt	Wt	ddm1-2	Wt	Wt	Wt	Wt	ddm1-2	Wt	Wt
MM27	1	12403444	12409920	6476	30.1682	Wt	Wt	Wt	Wt	Wt	Wt	Wt	Wt	Wt	Wt	ddm1-2	Wt	Wt	Wt	Wt	Wt	Wt	Wt	Wt	Wt	Wt	ddm1-2	Wt	Wt	Wt	Wt	Wt	Wt	Wt	Wt	Wt	Wt	ddm1-2	Wt	Wt	Wt	Wt	Wt	Wt	Wt	Wt	ddm1-2	Wt	Wt
MM33	1	13003203	13008718	5515	30.7253	Wt	Wt	Wt	Wt	Wt	Wt	Wt	Wt	Wt	Wt	ddm1-2	Wt	Wt	Wt	Wt	Wt	Wt	Wt	Wt	Wt	Wt	ddm1-2	Wt	Wt	Wt	Wt	Wt	Wt	Wt	Wt	Wt	Wt	ddm1-2	Wt	Wt	Wt	Wt	Wt	Wt	Wt	Wt	ddm1-2	Wt	Wt
MM39	1	13327860	13338926	11066	33.0717	Wt	Wt	Wt	Wt	Wt	Wt	Wt	Wt	Wt	Wt	ddm1-2	Wt	Wt	Wt	Wt	Wt	Wt	Wt	Wt	Wt	Wt	Wt	Wt	Wt	Wt	Wt	Wt	Wt	Wt	Wt	Wt	Wt	ddm1-2	Wt	Wt	Wt	Wt	Wt	Wt	Wt	Wt	ddm1-2	Wt	Wt
MM52	1	13617271	13620590	3319	33.6284	Wt	Wt	Wt	Wt	Wt	Wt	Wt	Wt	Wt	Wt	ddm1-2	Wt	Wt	Wt	Wt	Wt	Wt	Wt	Wt	Wt	Wt	Wt	Wt	Wt	Wt	Wt	Wt	Wt	Wt	Wt	Wt	Wt	ddm1-2	Wt	Wt	Wt	Wt	Wt	Wt	Wt	Wt	ddm1-2	Wt	Wt
MM58	1	13832559	13836079	3520	34.7609	Wt	Wt	Wt	Wt	Wt	Wt	Wt	Wt	Wt	Wt	ddm1-2	Wt	Wt	Wt	Wt	Wt	Wt	Wt	Wt	Wt	Wt	Wt	Wt	Wt	Wt	Wt	Wt	Wt	Wt	Wt	Wt	Wt	ddm1-2	Wt	Wt	Wt	Wt	Wt	Wt	Wt	Wt	ddm1-2	Wt	Wt
MM87	1	15687089	15687674	585	36.49	Wt	Wt	Wt	Wt	Wt	Wt	Wt	Wt	Wt	Wt	ddm1-2	Wt	Wt	Wt	Wt	Wt	Wt	Wt	Wt	Wt	Wt	Wt	Wt	Wt	Wt	Wt	Wt	Wt	Wt	Wt	Wt	Wt	ddm1-2	Wt	Wt	Wt	Wt	Wt	Wt	Wt	Wt	Wt	Wt	Wt
MM91	1	15908858	15909602	744	37.0469	Wt	Wt	Wt	Wt	Wt	Wt	Wt	Wt	Wt	Wt	ddm1-2	Wt	Wt	Wt	Wt	Wt	Wt	Wt	Wt	Wt	Wt	Wt	Wt	Wt	Wt	Wt	Wt	Wt	Wt	Wt	Wt	Wt	ddm1-2	Wt	Wt	Wt	Wt	Wt	Wt	Wt	Wt	Wt	Wt	Wt
MM101	1	16369580	16375570	5990	40.0328	Wt	Wt	Wt	Wt	Wt	Wt	Wt	Wt	Wt	Wt	ddm1-2	Wt	Wt	Wt	Wt	Wt	Wt	Wt	Wt	Wt	Wt	Wt	Wt	Wt	Wt	Wt	Wt	Wt	Wt	Wt	Wt	Wt	ddm1-2	Wt	Wt	Wt	Wt	Wt	Wt	Wt	Wt	Wt	Wt	Wt
MM114	1	16716535	16718404	1869	40.5898	Wt	Wt	Wt	Wt	Wt	Wt	Wt	Wt	Wt	Wt	ddm1-2	Wt	Wt	Wt	Wt	Wt	Wt	Wt	Wt	Wt	Wt	Wt	Wt	Wt	Wt	Wt	Wt	Wt	Wt	Wt	Wt	Wt	ddm1-2	Wt	Wt	Wt	Wt	Wt	Wt	Wt	Wt	Wt	Wt	Wt
MM123	1	17256398	17261949	5551	41.1469	Wt	Wt	Wt	Wt	Wt	Wt	Wt	Wt	Wt	Wt	ddm1-2	Wt	Wt	Wt	Wt	Wt	Wt	Wt	Wt	Wt	Wt	Wt	Wt	Wt	Wt	Wt	Wt	Wt	Wt	Wt	Wt	Wt	ddm1-2	Wt	Wt	Wt	Wt	Wt	Wt	Wt	Wt	Wt	Wt	Wt
MM126	1	17360678	17366043	5365	44.7962	ddm1-2	Wt	Wt	Wt	Wt	Wt	Wt	Wt	Wt	Wt	Wt	Wt	Wt	Wt	Wt	Wt	Wt	Wt	Wt	Wt	Wt	Wt	Wt	Wt	Wt	Wt	Wt	Wt	Wt	Wt	Wt	Wt	ddm1-2	Wt	Wt	Wt	Wt	Wt	Wt	Wt	Wt	Wt	Wt	Wt
MM128	1	17520573	17523612	3039	45.9293	ddm1-2	Wt	Wt	Wt	Wt	Wt	Wt	Wt	Wt	Wt	Wt	Wt	Wt	Wt	Wt	Wt	Wt	Wt	Wt	Wt	Wt	Wt	Wt	Wt	Wt	Wt	Wt	Wt	Wt	Wt	Wt	Wt	ddm1-2	Wt	Wt	Wt	Wt	Wt	Wt	Wt	Wt	Wt	Wt	Wt
MM147	1	21453496	21455680	2184	61.1983	ddm1-2	Wt	Wt	Wt	Wt	Wt	Wt	Wt	Wt	Wt	Wt	Wt	Wt	Wt	Wt	Wt	Wt	Wt	Wt	Wt	Wt	Wt	Wt	Wt	Wt	Wt	Wt	Wt	Wt	Wt	Wt	Wt	ddm1-2	Wt	Wt	Wt	Wt	ddm1-2	Wt	Wt	Wt	Wt	Wt	Wt
MM150	1	21747145	21754627	7482	62.3314	ddm1-2	Wt	Wt	Wt	Wt	Wt	Wt	Wt	Wt	Wt	Wt	Wt	Wt	Wt	Wt	Wt	Wt	Wt	Wt	Wt	Wt	Wt	Wt	Wt	Wt	Wt	Wt	Wt	Wt	Wt	Wt	Wt	Wt	Wt	Wt	Wt	Wt	ddm1-2	Wt	Wt	Wt	Wt	Wt	Wt
MM157	1	22231141	22232630	1489	63.4645	ddm1-2	Wt	Wt	Wt	Wt	Wt	Wt	Wt	Wt	Wt	Wt	Wt	Wt	Wt	Wt	Wt	Wt	Wt	Wt	ddm1-2	Wt	Wt	Wt	Wt	Wt	Wt	Wt	Wt	Wt	Wt	Wt	Wt	Wt	Wt	Wt	Wt	Wt	ddm1-2	Wt	Wt	Wt	Wt	Wt	Wt
MM158	1	23566815	23569314	2499	67.8021	ddm1-2	Wt	Wt	Wt	Wt	Wt	Wt	Wt	Wt	Wt	Wt	Wt	Wt	Wt	Wt	Wt	Wt	Wt	Wt	ddm1-2	Wt	Wt	Wt	Wt	Wt	Wt	Wt	Wt	Wt	Wt	Wt	Wt	Wt	Wt	Wt	Wt	Wt	ddm1-2	Wt	Wt	Wt	Wt	Wt	Wt
MM159	1	24428878	24429500	622	68.3591	ddm1-2	Wt	Wt	Wt	Wt	Wt	Wt	Wt	Wt	Wt	Wt	Wt	Wt	Wt	Wt	Wt	Wt	Wt	Wt	ddm1-2	Wt	Wt	Wt	Wt	Wt	Wt	Wt	Wt	Wt	Wt	Wt	Wt	Wt	Wt	Wt	Wt	Wt	ddm1-2	Wt	Wt	Wt	Wt	Wt	Wt
MM160	1	24455996	24456837	841	70.0883	ddm1-2	Wt	Wt	Wt	Wt	Wt	ddm1-2	Wt	Wt	Wt	Wt	Wt	Wt	Wt	Wt	Wt	Wt	Wt	Wt	ddm1-2	Wt	Wt	Wt	Wt	Wt	Wt	Wt	Wt	Wt	Wt	Wt	ddm1-2	Wt	Wt	Wt	Wt	Wt	ddm1-2	Wt	Wt	Wt	Wt	Wt	Wt
MM163	1	27066795	27067780	985	106.313	Wt	Wt	Wt	Wt	Wt	ddm1-2	ddm1-2	Wt	Wt	Wt	ddm1-2	Wt	Wt	Wt	ddm1-2	Wt	ddm1-2	Wt	Wt	ddm1-2	Wt	Wt	Wt	Wt	ddm1-2	Wt	Wt	Wt	Wt	Wt	Wt	ddm1-2	Wt	Wt	Wt	Wt	Wt	ddm1-2	Wt	Wt	Wt	Wt	ddm1-2	Wt
MM166	2	245701	249383	3682	0	Wt	Wt	Wt	Wt	Wt	Wt	Wt	Wt	Wt	Wt	Wt	Wt	Wt	Wt	Wt	Wt	Wt	ddm1-2	Wt	Wt	Wt	Wt	Wt	Wt	Wt	Wt	Wt	Wt	Wt	Wt	Wt	Wt	Wt	Wt	Wt	Wt	Wt	ddm1-2	Wt	Wt	Wt	Wt	Wt	Wt
MM167	2	373128	378733	5605	0.557051	Wt	Wt	Wt	Wt	Wt	Wt	Wt	Wt	Wt	Wt	Wt	Wt	Wt	Wt	Wt	Wt	Wt	ddm1-2	Wt	Wt	Wt	Wt	Wt	Wt	Wt	Wt	Wt	Wt	Wt	Wt	Wt	Wt	Wt	Wt	Wt	Wt	Wt	ddm1-2	Wt	Wt	Wt	Wt	Wt	Wt
MM168	2	930665	931040	375	4.20633	Wt	Wt	Wt	Wt	Wt	Wt	Wt	Wt	Wt	Wt	Wt	Wt	Wt	Wt	Wt	Wt	Wt	Wt	Wt	Wt	Wt	Wt	Wt	Wt	Wt	Wt	Wt	Wt	Wt	Wt	Wt	Wt	Wt	Wt	Wt	Wt	Wt	ddm1-2	Wt	Wt	Wt	Wt	Wt	Wt
MM171	2	1251577	1252905	1328	5.33945	Wt	Wt	Wt	Wt	Wt	Wt	Wt	Wt	Wt	Wt	Wt	Wt	Wt	Wt	Wt	Wt	Wt	Wt	Wt	Wt	Wt	Wt	Wt	Wt	Wt	Wt	Wt	Wt	Wt	Wt	Wt	Wt	Wt	Wt	Wt	Wt	Wt	ddm1-2	Wt	Wt	Wt	Wt	Wt	Wt
MM240	2	3723626	3727094	3468	6.47258	Wt	Wt	Wt	Wt	Wt	Wt	Wt	Wt	Wt	Wt	Wt	Wt	Wt	Wt	Wt	Wt	Wt	Wt	Wt	Wt	Wt	Wt	Wt	Wt	Wt	Wt	Wt	Wt	Wt	Wt	Wt	Wt	Wt	Wt	Wt	Wt	Wt	ddm1-2	Wt	Wt	Wt	Wt	Wt	Wt
MM330	2	5852792	5857571	4779	7.02963	Wt	Wt	Wt	Wt	Wt	Wt	Wt	Wt	Wt	Wt	Wt	Wt	Wt	Wt	Wt	Wt	Wt	Wt	Wt	Wt	Wt	Wt	Wt	Wt	Wt	Wt	Wt	Wt	Wt	Wt	Wt	Wt	Wt	Wt	Wt	Wt	Wt	ddm1-2	Wt	Wt	Wt	Wt	Wt	Wt
MM335	2	6109339	6112496	3157	7.58669	Wt	Wt	Wt	Wt	Wt	Wt	Wt	Wt	Wt	Wt	Wt	Wt	Wt	Wt	Wt	Wt	Wt	Wt	Wt	Wt	Wt	Wt	Wt	Wt	Wt	Wt	Wt	Wt	ddm1-2	Wt	Wt	Wt	Wt	Wt	Wt	Wt	Wt	ddm1-2	Wt	Wt	Wt	Wt	Wt	Wt
MM357	2	6953998	6958796	4798	8.71981	Wt	Wt	Wt	Wt	Wt	Wt	Wt	Wt	Wt	Wt	Wt	Wt	Wt	Wt	Wt	Wt	Wt	Wt	Wt	ddm1-2	Wt	Wt	Wt	Wt	Wt	Wt	Wt	Wt	ddm1-2	Wt	Wt	Wt	Wt	Wt	Wt	Wt	Wt	ddm1-2	Wt	Wt	Wt	Wt	Wt	Wt
MM371	2	7537594	7538640	1046	9.85294	Wt	Wt	Wt	Wt	Wt	Wt	Wt	Wt	Wt	Wt	Wt	Wt	Wt	Wt	Wt	Wt	Wt	Wt	Wt	ddm1-2	Wt	Wt	Wt	Wt	Wt	Wt	Wt	Wt	ddm1-2	Wt	Wt	Wt	Wt	Wt	Wt	Wt	Wt	ddm1-2	Wt	Wt	Wt	Wt	Wt	Wt
MM372	2	7777164	7783980	6816	10.41	Wt	Wt	Wt	Wt	Wt	Wt	Wt	Wt	Wt	Wt	Wt	Wt	Wt	Wt	Wt	Wt	Wt	Wt	Wt	ddm1-2	Wt	Wt	Wt	Wt	Wt	Wt	Wt	Wt	ddm1-2	Wt	Wt	Wt	Wt	Wt	Wt	Wt	Wt	ddm1-2	Wt	Wt	Wt	Wt	Wt	Wt
MM373	2	8271174	8274489	3315	10.9671	Wt	Wt	Wt	Wt	Wt	Wt	Wt	Wt	Wt	Wt	Wt	Wt	Wt	Wt	Wt	Wt	Wt	Wt	Wt	ddm1-2	Wt	Wt	Wt	Wt	Wt	Wt	Wt	Wt	ddm1-2	Wt	Wt	Wt	Wt	Wt	Wt	Wt	Wt	ddm1-2	Wt	Wt	Wt	Wt	Wt	Wt
MM374	2	8561263	8564127	2864	12.6963	Wt	Wt	Wt	Wt	Wt	Wt	Wt	Wt	Wt	Wt	Wt	Wt	Wt	Wt	Wt	Wt	Wt	Wt	Wt	ddm1-2	Wt	Wt	Wt	Wt	Wt	Wt	Wt	Wt	ddm1-2	Wt	Wt	Wt	Wt	Wt	Wt	Wt	Wt	ddm1-2	Wt	Wt	ddm1-2	Wt	ddm1-2	Wt
MM378	2	9122042	9123805	1763	13.2533	Wt	Wt	Wt	Wt	Wt	Wt	Wt	Wt	Wt	Wt	Wt	Wt	Wt	Wt	Wt	Wt	Wt	Wt	Wt	ddm1-2	Wt	Wt	Wt	Wt	Wt	Wt	Wt	Wt	ddm1-2	Wt	Wt	Wt	Wt	Wt	Wt	Wt	Wt	ddm1-2	Wt	Wt	ddm1-2	Wt	ddm1-2	Wt
MM379	2	9187421	9191390	3969	13.8104	Wt	Wt	Wt	Wt	Wt	Wt	Wt	Wt	Wt	Wt	Wt	Wt	Wt	Wt	Wt	Wt	Wt	Wt	Wt	ddm1-2	Wt	Wt	Wt	Wt	Wt	Wt	Wt	Wt	ddm1-2	Wt	Wt	Wt	Wt	Wt	Wt	Wt	Wt	ddm1-2	Wt	Wt	ddm1-2	Wt	ddm1-2	Wt
MM380	2	9652580	9652952	372	14.9435	Wt	Wt	Wt	Wt	Wt	Wt	Wt	Wt	Wt	Wt	Wt	Wt	Wt	Wt	Wt	Wt	Wt	Wt	Wt	ddm1-2	Wt	Wt	Wt	Wt	ddm1-2	Wt	Wt	Wt	ddm1-2	Wt	Wt	Wt	Wt	Wt	Wt	Wt	Wt	ddm1-2	Wt	Wt	ddm1-2	Wt	ddm1-2	Wt
MM382	2	10533516	10534171	655	21.5118	Wt	Wt	Wt	Wt	Wt	Wt	Wt	Wt	Wt	Wt	Wt	Wt	Wt	Wt	Wt	Wt	Wt	Wt	Wt	ddm1-2	Wt	Wt	Wt	Wt	ddm1-2	Wt	Wt	Wt	ddm1-2	Wt	ddm1-2	Wt	Wt	Wt	Wt	Wt	Wt	ddm1-2	ddm1-2	Wt	ddm1-2	Wt	ddm1-2	Wt
MM383	2	12449489	12454436	4947	35.6225	Wt	Wt	Wt	Wt	Wt	Wt	Wt	Wt	Wt	Wt	Wt	Wt	Wt	Wt	Wt	ddm1-2	Wt	Wt	Wt	ddm1-2	Wt	ddm1-2	Wt	Wt	ddm1-2	Wt	Wt	Wt	ddm1-2	Wt	ddm1-2	Wt	Wt	ddm1-2	Wt	Wt	Wt	ddm1-2	ddm1-2	Wt	ddm1-2	Wt	Wt	Wt
MM385	2	12736428	12736760	332	39.2717	Wt	Wt	Wt	Wt	Wt	Wt	Wt	Wt	Wt	Wt	Wt	Wt	Wt	Wt	Wt	ddm1-2	Wt	Wt	Wt	Wt	Wt	ddm1-2	Wt	Wt	ddm1-2	Wt	Wt	Wt	ddm1-2	Wt	ddm1-2	Wt	Wt	ddm1-2	Wt	Wt	Wt	ddm1-2	ddm1-2	Wt	ddm1-2	Wt	Wt	Wt
MM388	2	15411513	15411897	384	61.3719	ddm1-2	Wt	Wt	Wt	Wt	Wt	Wt	Wt	Wt	Wt	Wt	Wt	Wt	Wt	Wt	ddm1-2	Wt	Wt	Wt	ddm1-2	ddm1-2	ddm1-2	Wt	Wt	Wt	Wt	Wt	Wt	ddm1-2	Wt	ddm1-2	Wt	Wt	ddm1-2	Wt	Wt	Wt	ddm1-2	Wt	Wt	ddm1-2	ddm1-2	ddm1-2	Wt
MM392	3	129249	129923	674	0	Wt	ddm1-2	Wt	Wt	Wt	Wt	ddm1-2	ddm1-2	Wt	ddm1-2	Wt	Wt	Wt	Wt	Wt	Wt	Wt	Wt	Wt	ddm1-2	ddm1-2	Wt	ddm1-2	Wt	Wt	Wt	ddm1-2	Wt	Wt	ddm1-2	Wt	ddm1-2	Wt	Wt	Wt	ddm1-2	Wt	Wt	ddm1-2	Wt	Wt	Wt	Wt	Wt
MM396	3	7061213	7061893	680	25.4545	Wt	Wt	Wt	Wt	Wt	ddm1-2	ddm1-2	Wt	Wt	Wt	Wt	Wt	Wt	Wt	Wt	Wt	Wt	Wt	Wt	ddm1-2	Wt	Wt	Wt	Wt	Wt	Wt	Wt	Wt	Wt	ddm1-2	Wt	Wt	Wt	Wt	Wt	ddm1-2	Wt	Wt	ddm1-2	Wt	Wt	ddm1-2	Wt	ddm1-2
MM398	3	7738882	7739248	366	26.5876	Wt	Wt	Wt	Wt	Wt	ddm1-2	ddm1-2	Wt	Wt	Wt	Wt	Wt	Wt	Wt	Wt	Wt	Wt	Wt	Wt	ddm1-2	Wt	Wt	Wt	Wt	Wt	Wt	Wt	ddm1-2	Wt	ddm1-2	Wt	Wt	Wt	Wt	Wt	ddm1-2	Wt	Wt	ddm1-2	Wt	Wt	ddm1-2	Wt	ddm1-2
MM399	3	8937118	8938596	1478	34.7999	Wt	Wt	Wt	Wt	Wt	ddm1-2	ddm1-2	Wt	Wt	Wt	Wt	Wt	Wt	Wt	Wt	Wt	Wt	Wt	Wt	ddm1-2	Wt	Wt	Wt	Wt	Wt	Wt	Wt	ddm1-2	Wt	Wt	Wt	Wt	Wt	Wt	Wt	ddm1-2	Wt	Wt	Wt	Wt	Wt	Wt	ddm1-2	ddm1-2
MM400	3	9226930	9231459	4529	35.933	Wt	Wt	Wt	Wt	Wt	Wt	ddm1-2	Wt	Wt	Wt	Wt	Wt	Wt	Wt	Wt	Wt	Wt	Wt	Wt	ddm1-2	Wt	Wt	Wt	Wt	Wt	Wt	Wt	ddm1-2	Wt	Wt	Wt	Wt	Wt	Wt	Wt	ddm1-2	Wt	Wt	Wt	Wt	Wt	Wt	ddm1-2	ddm1-2
MM402	3	9435169	9438146	2977	36.49	Wt	Wt	Wt	Wt	Wt	Wt	ddm1-2	Wt	Wt	Wt	Wt	Wt	Wt	Wt	Wt	Wt	Wt	Wt	Wt	ddm1-2	Wt	Wt	Wt	Wt	Wt	Wt	Wt	ddm1-2	Wt	Wt	Wt	Wt	Wt	Wt	Wt	ddm1-2	Wt	Wt	Wt	Wt	Wt	Wt	ddm1-2	ddm1-2
MM405	3	9692187	9698029	5842	37.6232	Wt	Wt	Wt	Wt	Wt	Wt	ddm1-2	Wt	Wt	Wt	Wt	Wt	Wt	Wt	Wt	Wt	Wt	Wt	Wt	ddm1-2	Wt	Wt	Wt	Wt	Wt	Wt	Wt	ddm1-2	Wt	Wt	Wt	Wt	Wt	Wt	Wt	ddm1-2	Wt	Wt	Wt	Wt	Wt	Wt	ddm1-2	ddm1-2
MM414	3	11116135	11120705	4570	42.6755	Wt	Wt	Wt	Wt	Wt	Wt	Wt	Wt	Wt	Wt	Wt	Wt	Wt	Wt	Wt	Wt	ddm1-2	Wt	Wt	ddm1-2	Wt	Wt	Wt	Wt	Wt	Wt	Wt	ddm1-2	Wt	Wt	Wt	Wt	Wt	Wt	Wt	ddm1-2	Wt	Wt	Wt	Wt	Wt	Wt	Wt	ddm1-2
MM415	3	11171117	11175802	4685	43.2326	Wt	Wt	Wt	Wt	Wt	Wt	Wt	Wt	Wt	Wt	Wt	Wt	Wt	Wt	Wt	Wt	ddm1-2	Wt	Wt	ddm1-2	Wt	Wt	Wt	Wt	Wt	Wt	Wt	ddm1-2	Wt	Wt	Wt	Wt	Wt	Wt	Wt	ddm1-2	Wt	Wt	Wt	Wt	Wt	Wt	Wt	ddm1-2
MM418	3	11390669	11394320	3651	44.3657	Wt	Wt	Wt	Wt	Wt	Wt	Wt	Wt	Wt	Wt	Wt	Wt	Wt	Wt	Wt	Wt	ddm1-2	Wt	Wt	ddm1-2	Wt	Wt	Wt	Wt	Wt	Wt	Wt	ddm1-2	Wt	Wt	Wt	Wt	Wt	Wt	Wt	Wt	Wt	Wt	Wt	Wt	Wt	Wt	Wt	ddm1-2
MM427	3	11794591	11796632	2041	46.0949	Wt	Wt	Wt	Wt	Wt	Wt	Wt	Wt	ddm1-2	Wt	Wt	Wt	Wt	Wt	Wt	Wt	ddm1-2	Wt	Wt	ddm1-2	Wt	Wt	Wt	Wt	Wt	Wt	Wt	Wt	Wt	Wt	Wt	Wt	Wt	Wt	Wt	Wt	Wt	Wt	Wt	Wt	Wt	Wt	Wt	ddm1-2
MM432	3	12093672	12096096	2424	46.652	Wt	Wt	Wt	Wt	Wt	Wt	Wt	Wt	ddm1-2	Wt	Wt	Wt	Wt	Wt	Wt	Wt	ddm1-2	Wt	Wt	ddm1-2	Wt	Wt	Wt	Wt	Wt	Wt	Wt	Wt	Wt	Wt	Wt	Wt	Wt	Wt	Wt	Wt	Wt	Wt	Wt	Wt	Wt	Wt	Wt	ddm1-2
MM466	3	13664258	13667598	3340	47.209	Wt	Wt	Wt	Wt	Wt	Wt	Wt	Wt	Wt	Wt	Wt	Wt	Wt	Wt	Wt	Wt	ddm1-2	Wt	Wt	ddm1-2	Wt	Wt	Wt	Wt	Wt	Wt	Wt	Wt	Wt	Wt	Wt	Wt	Wt	Wt	Wt	Wt	Wt	Wt	Wt	Wt	Wt	Wt	Wt	ddm1-2
MM495	3	15175667	15177528	1861	47.7661	Wt	Wt	Wt	Wt	Wt	Wt	Wt	Wt	Wt	Wt	Wt	Wt	Wt	Wt	Wt	Wt	ddm1-2	Wt	ddm1-2	ddm1-2	Wt	Wt	Wt	Wt	Wt	Wt	Wt	Wt	Wt	Wt	Wt	Wt	Wt	Wt	Wt	Wt	Wt	Wt	Wt	Wt	Wt	Wt	Wt	ddm1-2
MM499	3	15307797	15314767	6970	48.3231	Wt	Wt	Wt	Wt	Wt	Wt	Wt	Wt	Wt	Wt	Wt	Wt	Wt	Wt	Wt	Wt	ddm1-2	Wt	ddm1-2	ddm1-2	Wt	Wt	Wt	Wt	Wt	Wt	Wt	Wt	Wt	Wt	Wt	Wt	Wt	Wt	Wt	Wt	Wt	Wt	Wt	Wt	Wt	Wt	Wt	ddm1-2
MM515	3	15621495	15627125	5630	49.4563	Wt	Wt	Wt	Wt	Wt	Wt	Wt	Wt	Wt	Wt	Wt	Wt	Wt	Wt	Wt	Wt	ddm1-2	Wt	ddm1-2	ddm1-2	Wt	Wt	Wt	Wt	Wt	Wt	Wt	Wt	Wt	Wt	Wt	Wt	Wt	Wt	Wt	Wt	Wt	Wt	Wt	Wt	Wt	Wt	Wt	ddm1-2
MM527	3	16173536	16180190	6654	50.5894	Wt	Wt	Wt	Wt	Wt	Wt	Wt	Wt	Wt	Wt	Wt	Wt	Wt	Wt	Wt	Wt	ddm1-2	Wt	ddm1-2	ddm1-2	Wt	Wt	Wt	Wt	Wt	Wt	Wt	Wt	Wt	Wt	Wt	Wt	Wt	Wt	Wt	Wt	Wt	Wt	ddm1-2	Wt	Wt	Wt	Wt	ddm1-2
MM529	3	16246179	16249374	3195	51.1464	Wt	Wt	Wt	Wt	Wt	Wt	Wt	Wt	Wt	Wt	Wt	Wt	Wt	Wt	Wt	Wt	ddm1-2	Wt	ddm1-2	ddm1-2	Wt	Wt	Wt	Wt	Wt	Wt	Wt	Wt	Wt	Wt	Wt	Wt	Wt	Wt	Wt	Wt	Wt	Wt	ddm1-2	Wt	Wt	Wt	Wt	ddm1-2
MM531	3	16497940	16498513	573	51.7035	Wt	Wt	Wt	Wt	Wt	Wt	Wt	Wt	Wt	Wt	Wt	Wt	Wt	Wt	Wt	Wt	ddm1-2	Wt	ddm1-2	ddm1-2	Wt	Wt	Wt	Wt	Wt	Wt	Wt	Wt	Wt	Wt	Wt	Wt	Wt	Wt	Wt	Wt	Wt	Wt	ddm1-2	Wt	Wt	Wt	Wt	ddm1-2
MM537	3	16810147	16814166	4019	52.2606	Wt	Wt	Wt	Wt	Wt	Wt	Wt	Wt	Wt	Wt	Wt	Wt	Wt	Wt	Wt	Wt	ddm1-2	Wt	ddm1-2	ddm1-2	Wt	Wt	Wt	Wt	Wt	Wt	Wt	Wt	Wt	Wt	Wt	Wt	Wt	Wt	Wt	Wt	Wt	Wt	ddm1-2	Wt	Wt	Wt	Wt	ddm1-2
MM544	3	18359991	18360495	504	64.2199	Wt	Wt	Wt	Wt	Wt	Wt	Wt	Wt	Wt	Wt	Wt	Wt	Wt	Wt	Wt	Wt	ddm1-2	Wt	ddm1-2	ddm1-2	Wt	Wt	ddm1-2	Wt	Wt	Wt	Wt	Wt	Wt	Wt	Wt	ddm1-2	Wt	Wt	Wt	Wt	Wt	Wt	ddm1-2	Wt	Wt	Wt	Wt	ddm1-2
MM546	3	22232528	22235548	3020	95.642	Wt	ddm1-2	Wt	Wt	Wt	ddm1-2	ddm1-2	Wt	Wt	Wt	Wt	Wt	Wt	Wt	Wt	Wt	ddm1-2	Wt	Wt	ddm1-2	Wt	Wt	ddm1-2	Wt	ddm1-2	Wt	Wt	Wt	Wt	Wt	Wt	ddm1-2	Wt	Wt	Wt	Wt	Wt	Wt	ddm1-2	ddm1-2	Wt	Wt	Wt	Wt
MM547	3	23204533	23207428	2895	101.437	Wt	Wt	Wt	Wt	Wt	ddm1-2	ddm1-2	Wt	Wt	ddm1-2	Wt	Wt	Wt	ddm1-2	Wt	Wt	ddm1-2	Wt	Wt	ddm1-2	Wt	ddm1-2	ddm1-2	Wt	ddm1-2	Wt	Wt	ddm1-2	Wt	Wt	Wt	Wt	Wt	Wt	Wt	Wt	Wt	Wt	ddm1-2	ddm1-2	Wt	Wt	Wt	Wt
MM550	4	788271	788807	536	0	ddm1-2	Wt	Wt	Wt	Wt	Wt	Wt	Wt	Wt	Wt	Wt	Wt	Wt	Wt	Wt	Wt	Wt	Wt	ddm1-2	Wt	Wt	Wt	Wt	Wt	Wt	Wt	Wt	Wt	ddm1-2	ddm1-2	Wt	Wt	Wt	Wt	Wt	Wt	Wt	Wt	ddm1-2	Wt	Wt	Wt	Wt	Wt
MM551	4	1312610	1315659	3049	1.72921	ddm1-2	Wt	Wt	Wt	Wt	Wt	Wt	Wt	Wt	Wt	Wt	Wt	Wt	Wt	Wt	Wt	Wt	Wt	ddm1-2	Wt	Wt	Wt	Wt	Wt	Wt	Wt	Wt	Wt	ddm1-2	ddm1-2	Wt	Wt	Wt	Wt	Wt	ddm1-2	Wt	Wt	ddm1-2	Wt	Wt	Wt	Wt	Wt
MM552	4	1447715	1448165	450	2.28627	ddm1-2	Wt	Wt	Wt	Wt	Wt	Wt	Wt	Wt	Wt	Wt	Wt	Wt	Wt	Wt	Wt	Wt	Wt	ddm1-2	Wt	Wt	Wt	Wt	Wt	Wt	Wt	Wt	Wt	ddm1-2	ddm1-2	Wt	Wt	Wt	Wt	Wt	ddm1-2	Wt	Wt	ddm1-2	Wt	Wt	Wt	Wt	Wt
MM553	4	1592615	1594783	2168	2.84333	ddm1-2	Wt	Wt	Wt	Wt	Wt	Wt	Wt	Wt	Wt	Wt	Wt	Wt	Wt	Wt	Wt	Wt	Wt	ddm1-2	Wt	Wt	Wt	Wt	Wt	Wt	Wt	Wt	Wt	ddm1-2	ddm1-2	Wt	Wt	Wt	Wt	Wt	ddm1-2	Wt	Wt	ddm1-2	Wt	Wt	Wt	Wt	Wt
MM586	4	2356048	2357772	1724	3.40039	ddm1-2	Wt	Wt	Wt	Wt	Wt	Wt	Wt	Wt	Wt	Wt	Wt	Wt	Wt	Wt	Wt	Wt	Wt	ddm1-2	Wt	Wt	Wt	Wt	Wt	Wt	Wt	Wt	Wt	ddm1-2	ddm1-2	Wt	Wt	Wt	Wt	Wt	ddm1-2	Wt	Wt	ddm1-2	Wt	Wt	Wt	Wt	Wt
MM587	4	2596834	2603154	6320	4.53351	ddm1-2	Wt	Wt	Wt	Wt	Wt	Wt	Wt	Wt	Wt	Wt	Wt	Wt	Wt	Wt	Wt	Wt	Wt	ddm1-2	Wt	Wt	Wt	Wt	Wt	Wt	Wt	Wt	Wt	ddm1-2	ddm1-2	Wt	Wt	Wt	Wt	Wt	ddm1-2	Wt	Wt	ddm1-2	Wt	Wt	Wt	Wt	Wt
MM654	4	5468768	5470844	2076	11.1018	ddm1-2	Wt	Wt	Wt	Wt	Wt	Wt	Wt	Wt	Wt	Wt	Wt	Wt	Wt	Wt	Wt	Wt	Wt	Wt	Wt	Wt	Wt	Wt	Wt	Wt	Wt	Wt	Wt	Wt	Wt	Wt	Wt	Wt	Wt	Wt	Wt	Wt	Wt	ddm1-2	Wt	Wt	Wt	Wt	Wt
MM661	4	5588249	5589490	1241	12.2349	ddm1-2	Wt	Wt	Wt	Wt	Wt	Wt	Wt	Wt	Wt	Wt	Wt	Wt	Wt	Wt	Wt	Wt	Wt	ddm1-2	Wt	Wt	Wt	Wt	Wt	Wt	Wt	Wt	Wt	Wt	Wt	Wt	Wt	Wt	Wt	Wt	Wt	Wt	Wt	ddm1-2	Wt	Wt	ddm1-2	Wt	Wt
MM665	4	5751473	5752453	980	16.5724	ddm1-2	Wt	Wt	Wt	Wt	Wt	Wt	Wt	ddm1-2	Wt	Wt	Wt	Wt	Wt	Wt	Wt	Wt	Wt	ddm1-2	Wt	Wt	Wt	Wt	Wt	Wt	Wt	Wt	Wt	Wt	ddm1-2	Wt	Wt	Wt	Wt	Wt	ddm1-2	Wt	Wt	ddm1-2	Wt	Wt	ddm1-2	Wt	Wt
MM666	4	5766437	5769156	2719	17.1295	ddm1-2	Wt	Wt	Wt	Wt	Wt	Wt	Wt	ddm1-2	Wt	Wt	Wt	Wt	Wt	Wt	Wt	Wt	Wt	ddm1-2	Wt	Wt	Wt	Wt	Wt	Wt	Wt	Wt	Wt	Wt	ddm1-2	Wt	Wt	Wt	Wt	Wt	ddm1-2	Wt	Wt	ddm1-2	Wt	Wt	ddm1-2	Wt	Wt
MM678	4	6467390	6472899	5509	21.467	ddm1-2	Wt	Wt	Wt	Wt	Wt	Wt	Wt	ddm1-2	Wt	Wt	Wt	Wt	Wt	Wt	Wt	Wt	Wt	ddm1-2	Wt	Wt	Wt	Wt	Wt	Wt	Wt	Wt	Wt	Wt	ddm1-2	Wt	Wt	Wt	Wt	Wt	ddm1-2	Wt	Wt	Wt	Wt	Wt	ddm1-2	Wt	Wt
MM679	4	6723450	6729287	5837	22.024	ddm1-2	Wt	Wt	Wt	Wt	Wt	Wt	Wt	ddm1-2	Wt	Wt	Wt	Wt	Wt	Wt	Wt	Wt	Wt	ddm1-2	Wt	Wt	Wt	Wt	Wt	Wt	Wt	Wt	Wt	Wt	ddm1-2	Wt	Wt	Wt	Wt	Wt	ddm1-2	Wt	Wt	Wt	Wt	Wt	ddm1-2	Wt	Wt
MM686	4	8313712	8319386	5674	32.9821	ddm1-2	Wt	Wt	Wt	Wt	Wt	Wt	Wt	ddm1-2	Wt	Wt	Wt	Wt	Wt	Wt	Wt	Wt	Wt	Wt	Wt	Wt	Wt	Wt	Wt	Wt	ddm1-2	Wt	Wt	Wt	Wt	Wt	Wt	Wt	Wt	Wt	ddm1-2	ddm1-2	Wt	Wt	Wt	Wt	Wt	Wt	Wt
MM689	4	8906583	8907282	699	38.7774	ddm1-2	Wt	Wt	Wt	Wt	Wt	Wt	Wt	Wt	Wt	Wt	Wt	Wt	Wt	Wt	Wt	Wt	Wt	Wt	Wt	Wt	Wt	Wt	Wt	Wt	ddm1-2	Wt	Wt	Wt	Wt	Wt	Wt	Wt	Wt	Wt	ddm1-2	Wt	Wt	Wt	Wt	Wt	Wt	Wt	Wt
MM691	4	9483915	9485389	1474	42.4266	ddm1-2	Wt	Wt	Wt	Wt	Wt	Wt	Wt	Wt	Wt	Wt	Wt	Wt	Wt	Wt	Wt	Wt	Wt	Wt	Wt	Wt	Wt	Wt	Wt	Wt	ddm1-2	Wt	Wt	Wt	Wt	Wt	Wt	Wt	Wt	Wt	ddm1-2	ddm1-2	Wt	Wt	Wt	Wt	Wt	Wt	Wt
MM693	4	9734026	9737715	3689	42.9837	ddm1-2	Wt	Wt	Wt	Wt	Wt	Wt	Wt	Wt	Wt	Wt	Wt	Wt	Wt	Wt	Wt	Wt	Wt	Wt	Wt	Wt	Wt	Wt	Wt	Wt	ddm1-2	Wt	Wt	Wt	Wt	Wt	Wt	Wt	Wt	ddm1-2	ddm1-2	ddm1-2	Wt	Wt	Wt	Wt	Wt	Wt	Wt
MM694	4	10527343	10529079	1736	52.9857	ddm1-2	Wt	Wt	Wt	Wt	Wt	Wt	Wt	Wt	Wt	Wt	Wt	Wt	Wt	Wt	Wt	Wt	Wt	Wt	Wt	Wt	Wt	Wt	ddm1-2	Wt	Wt	Wt	Wt	ddm1-2	Wt	Wt	Wt	Wt	Wt	ddm1-2	ddm1-2	ddm1-2	Wt	Wt	ddm1-2	Wt	Wt	Wt	Wt
MM695	4	10992786	10997950	5164	53.5428	ddm1-2	Wt	Wt	Wt	Wt	Wt	Wt	Wt	Wt	Wt	Wt	Wt	Wt	Wt	Wt	Wt	Wt	Wt	Wt	Wt	Wt	Wt	Wt	ddm1-2	Wt	Wt	Wt	Wt	ddm1-2	Wt	Wt	Wt	Wt	Wt	ddm1-2	ddm1-2	ddm1-2	Wt	Wt	ddm1-2	Wt	Wt	Wt	Wt
MM698	4	11363438	11369209	5771	54.6759	ddm1-2	Wt	Wt	Wt	Wt	Wt	Wt	Wt	Wt	Wt	Wt	Wt	Wt	Wt	Wt	Wt	Wt	Wt	Wt	Wt	Wt	Wt	Wt	ddm1-2	Wt	Wt	Wt	Wt	ddm1-2	Wt	Wt	Wt	Wt	Wt	ddm1-2	ddm1-2	ddm1-2	Wt	Wt	ddm1-2	Wt	Wt	Wt	Wt
MM699	4	11820298	11824662	4364	58.3252	ddm1-2	Wt	Wt	Wt	Wt	Wt	Wt	Wt	Wt	Wt	ddm1-2	Wt	Wt	Wt	Wt	Wt	Wt	Wt	Wt	Wt	Wt	Wt	Wt	ddm1-2	Wt	Wt	Wt	Wt	ddm1-2	Wt	Wt	Wt	Wt	Wt	ddm1-2	ddm1-2	ddm1-2	Wt	Wt	ddm1-2	Wt	Wt	ddm1-2	Wt
MM701	4	13624413	13631909	7496	68.3272	ddm1-2	Wt	Wt	Wt	Wt	Wt	ddm1-2	Wt	Wt	Wt	ddm1-2	Wt	Wt	Wt	Wt	Wt	Wt	Wt	Wt	Wt	ddm1-2	Wt	Wt	Wt	Wt	Wt	Wt	Wt	ddm1-2	Wt	Wt	Wt	Wt	Wt	ddm1-2	ddm1-2	Wt	Wt	Wt	Wt	ddm1-2	Wt	Wt	Wt
MM703	4	14987449	14988379	930	72.6647	Wt	Wt	Wt	Wt	Wt	Wt	ddm1-2	Wt	Wt	Wt	ddm1-2	Wt	Wt	Wt	Wt	Wt	Wt	Wt	Wt	Wt	ddm1-2	Wt	Wt	Wt	Wt	Wt	Wt	Wt	Wt	Wt	Wt	Wt	Wt	Wt	ddm1-2	ddm1-2	Wt	Wt	Wt	Wt	ddm1-2	Wt	Wt	Wt
MM704	4	17712932	17716786	3854	82.6668	Wt	Wt	Wt	ddm1-2	Wt	Wt	ddm1-2	Wt	Wt	Wt	Wt	Wt	Wt	Wt	Wt	Wt	ddm1-2	Wt	Wt	Wt	Wt	Wt	Wt	Wt	Wt	Wt	Wt	ddm1-2	Wt	Wt	Wt	Wt	Wt	Wt	ddm1-2	ddm1-2	Wt	Wt	Wt	ddm1-2	ddm1-2	Wt	Wt	Wt
MM706	5	1686486	1687059	573	0	Wt	Wt	ddm1-2	Wt	Wt	ddm1-2	Wt	Wt	Wt	Wt	Wt	Wt	Wt	Wt	Wt	ddm1-2	Wt	ddm1-2	ddm1-2	ddm1-2	Wt	Wt	Wt	Wt	ddm1-2	Wt	Wt	ddm1-2	Wt	Wt	ddm1-2	ddm1-2	Wt	ddm1-2	Wt	Wt	Wt	Wt	Wt	Wt	Wt	Wt	Wt	ddm1-2
MM707	5	2262158	2262592	434	3.64926	Wt	Wt	ddm1-2	Wt	Wt	ddm1-2	Wt	Wt	Wt	Wt	Wt	Wt	Wt	Wt	Wt	ddm1-2	Wt	ddm1-2	ddm1-2	ddm1-2	Wt	Wt	Wt	Wt	Wt	Wt	Wt	ddm1-2	Wt	Wt	Wt	ddm1-2	Wt	ddm1-2	ddm1-2	ddm1-2	Wt	Wt	Wt	Wt	Wt	Wt	Wt	ddm1-2
MM712	5	4320750	4323396	2646	12.7369	Wt	Wt	ddm1-2	Wt	Wt	Wt	Wt	Wt	Wt	Wt	Wt	Wt	Wt	Wt	Wt	ddm1-2	Wt	ddm1-2	Wt	ddm1-2	Wt	Wt	Wt	Wt	Wt	Wt	Wt	ddm1-2	Wt	Wt	Wt	ddm1-2	Wt	ddm1-2	ddm1-2	Wt	Wt	Wt	Wt	Wt	Wt	Wt	Wt	ddm1-2
MM713	5	5635291	5635672	381	22.7389	Wt	Wt	ddm1-2	Wt	Wt	Wt	Wt	Wt	Wt	Wt	Wt	Wt	Wt	Wt	Wt	ddm1-2	ddm1-2	ddm1-2	Wt	ddm1-2	ddm1-2	Wt	Wt	Wt	Wt	Wt	Wt	ddm1-2	Wt	Wt	Wt	ddm1-2	Wt	ddm1-2	ddm1-2	ddm1-2	Wt	Wt	ddm1-2	Wt	ddm1-2	Wt	Wt	ddm1-2
MM715	5	6433686	6438863	5177	23.2959	Wt	Wt	ddm1-2	Wt	Wt	Wt	Wt	Wt	Wt	Wt	Wt	Wt	Wt	Wt	Wt	ddm1-2	ddm1-2	ddm1-2	Wt	ddm1-2	ddm1-2	Wt	Wt	Wt	Wt	Wt	Wt	ddm1-2	Wt	Wt	Wt	ddm1-2	Wt	ddm1-2	ddm1-2	ddm1-2	Wt	Wt	ddm1-2	Wt	ddm1-2	Wt	Wt	ddm1-2
MM716	5	7027575	7028394	819	24.4291	Wt	Wt	ddm1-2	Wt	Wt	Wt	Wt	Wt	Wt	Wt	Wt	Wt	Wt	Wt	Wt	ddm1-2	ddm1-2	Wt	Wt	ddm1-2	ddm1-2	Wt	Wt	Wt	Wt	Wt	Wt	ddm1-2	Wt	Wt	Wt	ddm1-2	Wt	ddm1-2	ddm1-2	ddm1-2	Wt	Wt	ddm1-2	Wt	ddm1-2	Wt	Wt	ddm1-2
MM718	5	7823816	7824693	877	30.9974	Wt	Wt	ddm1-2	Wt	Wt	Wt	Wt	Wt	Wt	Wt	Wt	Wt	Wt	Wt	Wt	Wt	ddm1-2	Wt	Wt	Wt	ddm1-2	Wt	Wt	Wt	Wt	Wt	Wt	ddm1-2	Wt	Wt	Wt	ddm1-2	Wt	ddm1-2	ddm1-2	ddm1-2	Wt	Wt	Wt	Wt	ddm1-2	Wt	Wt	ddm1-2
MM719	5	8574744	8577763	3019	32.7266	Wt	Wt	ddm1-2	Wt	Wt	Wt	Wt	Wt	Wt	Wt	Wt	Wt	Wt	Wt	Wt	Wt	ddm1-2	Wt	Wt	Wt	ddm1-2	Wt	Wt	Wt	Wt	Wt	Wt	ddm1-2	Wt	Wt	Wt	Wt	Wt	ddm1-2	ddm1-2	ddm1-2	Wt	Wt	Wt	Wt	ddm1-2	Wt	Wt	ddm1-2
MM721	5	8666293	8667347	1054	33.2837	Wt	Wt	ddm1-2	Wt	Wt	Wt	Wt	Wt	Wt	Wt	Wt	Wt	Wt	Wt	Wt	Wt	ddm1-2	Wt	Wt	Wt	ddm1-2	Wt	Wt	Wt	Wt	Wt	Wt	ddm1-2	Wt	Wt	Wt	Wt	Wt	ddm1-2	ddm1-2	ddm1-2	Wt	Wt	Wt	Wt	ddm1-2	Wt	Wt	ddm1-2
MM722	5	8788118	8788841	723	34.4168	Wt	Wt	ddm1-2	Wt	Wt	Wt	Wt	Wt	Wt	Wt	Wt	Wt	Wt	Wt	Wt	Wt	ddm1-2	Wt	Wt	ddm1-2	ddm1-2	Wt	Wt	Wt	Wt	Wt	Wt	ddm1-2	Wt	Wt	Wt	Wt	Wt	ddm1-2	ddm1-2	ddm1-2	Wt	Wt	Wt	Wt	ddm1-2	Wt	Wt	ddm1-2
MM724	5	9206566	9207396	830	34.9738	Wt	Wt	ddm1-2	Wt	Wt	Wt	Wt	Wt	Wt	Wt	Wt	Wt	Wt	Wt	Wt	Wt	ddm1-2	Wt	Wt	ddm1-2	Wt	Wt	Wt	Wt	Wt	Wt	Wt	ddm1-2	Wt	Wt	Wt	Wt	Wt	ddm1-2	ddm1-2	ddm1-2	Wt	Wt	Wt	Wt	ddm1-2	Wt	Wt	ddm1-2
MM725	5	9412158	9414684	2526	36.107	Wt	Wt	ddm1-2	Wt	Wt	Wt	Wt	Wt	Wt	Wt	Wt	Wt	Wt	Wt	Wt	Wt	ddm1-2	Wt	Wt	ddm1-2	Wt	Wt	Wt	Wt	Wt	Wt	Wt	ddm1-2	Wt	Wt	Wt	Wt	Wt	ddm1-2	ddm1-2	ddm1-2	Wt	Wt	Wt	Wt	ddm1-2	Wt	Wt	ddm1-2
MM726	5	9561314	9563183	1869	36.664	Wt	Wt	ddm1-2	Wt	Wt	Wt	Wt	Wt	Wt	Wt	Wt	Wt	Wt	Wt	Wt	Wt	ddm1-2	Wt	Wt	ddm1-2	Wt	Wt	Wt	Wt	Wt	Wt	Wt	ddm1-2	Wt	Wt	Wt	Wt	Wt	ddm1-2	ddm1-2	ddm1-2	Wt	Wt	Wt	Wt	ddm1-2	Wt	Wt	ddm1-2
MM728	5	9712274	9712833	559	37.7971	Wt	Wt	ddm1-2	Wt	Wt	Wt	Wt	Wt	Wt	Wt	Wt	Wt	Wt	Wt	Wt	Wt	ddm1-2	Wt	Wt	ddm1-2	Wt	Wt	Wt	Wt	Wt	Wt	Wt	ddm1-2	Wt	Wt	Wt	Wt	Wt	ddm1-2	ddm1-2	ddm1-2	Wt	Wt	Wt	Wt	ddm1-2	Wt	ddm1-2	ddm1-2
MM731	5	9929041	9929810	769	38.3542	Wt	Wt	Wt	Wt	Wt	Wt	Wt	Wt	Wt	Wt	Wt	Wt	Wt	Wt	Wt	Wt	ddm1-2	Wt	Wt	ddm1-2	Wt	Wt	Wt	Wt	Wt	Wt	Wt	ddm1-2	Wt	Wt	Wt	Wt	Wt	ddm1-2	ddm1-2	ddm1-2	Wt	Wt	Wt	Wt	ddm1-2	Wt	ddm1-2	ddm1-2
MM734	5	10049717	10056326	6609	39.4873	Wt	Wt	Wt	Wt	Wt	Wt	Wt	Wt	Wt	Wt	Wt	Wt	Wt	Wt	Wt	Wt	ddm1-2	Wt	Wt	ddm1-2	Wt	Wt	Wt	Wt	Wt	Wt	Wt	ddm1-2	Wt	Wt	Wt	Wt	Wt	Wt	ddm1-2	ddm1-2	Wt	Wt	Wt	Wt	ddm1-2	Wt	ddm1-2	ddm1-2
MM744	5	10351499	10356314	4815	40.0444	Wt	Wt	Wt	Wt	Wt	Wt	Wt	Wt	Wt	Wt	Wt	Wt	Wt	Wt	Wt	Wt	ddm1-2	Wt	Wt	ddm1-2	Wt	Wt	Wt	Wt	Wt	Wt	Wt	ddm1-2	Wt	Wt	Wt	Wt	Wt	Wt	ddm1-2	ddm1-2	Wt	Wt	Wt	Wt	ddm1-2	Wt	ddm1-2	Wt
MM823	5	13639701	13644184	4483	41.1775	Wt	Wt	Wt	Wt	Wt	Wt	Wt	Wt	Wt	Wt	Wt	Wt	Wt	Wt	Wt	Wt	ddm1-2	Wt	Wt	ddm1-2	Wt	Wt	Wt	Wt	Wt	Wt	Wt	ddm1-2	Wt	Wt	Wt	Wt	Wt	Wt	ddm1-2	ddm1-2	Wt	Wt	Wt	Wt	Wt	Wt	ddm1-2	Wt
MM825	5	13736246	13741022	4776	41.7346	Wt	Wt	Wt	Wt	Wt	Wt	Wt	Wt	Wt	Wt	ddm1-2	Wt	Wt	Wt	Wt	Wt	ddm1-2	Wt	Wt	ddm1-2	Wt	Wt	Wt	Wt	Wt	Wt	Wt	ddm1-2	Wt	Wt	Wt	Wt	Wt	Wt	ddm1-2	ddm1-2	Wt	Wt	Wt	Wt	Wt	Wt	ddm1-2	Wt
MM827	5	13787829	13788887	1058	42.2916	Wt	Wt	Wt	Wt	Wt	Wt	Wt	Wt	Wt	Wt	ddm1-2	Wt	Wt	Wt	Wt	Wt	ddm1-2	Wt	Wt	ddm1-2	Wt	Wt	Wt	Wt	Wt	Wt	Wt	ddm1-2	Wt	Wt	Wt	Wt	Wt	Wt	ddm1-2	ddm1-2	Wt	Wt	Wt	Wt	Wt	Wt	ddm1-2	Wt
MM832	5	13883919	13890852	6933	43.4247	Wt	Wt	Wt	Wt	Wt	Wt	Wt	Wt	Wt	Wt	ddm1-2	Wt	Wt	Wt	Wt	Wt	ddm1-2	Wt	Wt	ddm1-2	Wt	Wt	Wt	Wt	Wt	Wt	Wt	ddm1-2	Wt	Wt	Wt	Wt	Wt	Wt	ddm1-2	ddm1-2	Wt	Wt	Wt	Wt	ddm1-2	Wt	ddm1-2	Wt
MM837	5	14113391	14118281	4890	43.9818	Wt	Wt	Wt	Wt	Wt	Wt	Wt	Wt	Wt	Wt	ddm1-2	Wt	Wt	Wt	Wt	Wt	ddm1-2	Wt	Wt	ddm1-2	Wt	Wt	Wt	Wt	Wt	Wt	Wt	ddm1-2	Wt	Wt	Wt	Wt	Wt	Wt	ddm1-2	ddm1-2	Wt	Wt	Wt	Wt	ddm1-2	Wt	ddm1-2	Wt
MM845	5	15646264	15651277	5013	45.1149	Wt	Wt	Wt	Wt	Wt	Wt	Wt	Wt	Wt	Wt	ddm1-2	Wt	Wt	Wt	Wt	Wt	ddm1-2	Wt	Wt	ddm1-2	Wt	Wt	Wt	Wt	Wt	Wt	Wt	ddm1-2	Wt	Wt	Wt	Wt	Wt	Wt	ddm1-2	ddm1-2	Wt	Wt	Wt	Wt	ddm1-2	Wt	ddm1-2	Wt
MM849	5	15718994	15720069	1075	45.672	Wt	Wt	Wt	Wt	Wt	Wt	Wt	Wt	Wt	Wt	ddm1-2	Wt	Wt	Wt	Wt	Wt	ddm1-2	Wt	Wt	ddm1-2	Wt	Wt	Wt	Wt	Wt	Wt	Wt	ddm1-2	Wt	Wt	Wt	Wt	Wt	Wt	ddm1-2	Wt	Wt	Wt	Wt	Wt	ddm1-2	Wt	ddm1-2	Wt
MM853	5	15920507	15922491	1984	46.229	Wt	Wt	Wt	Wt	Wt	Wt	Wt	Wt	Wt	Wt	ddm1-2	Wt	Wt	Wt	Wt	Wt	ddm1-2	Wt	Wt	ddm1-2	Wt	Wt	Wt	Wt	Wt	Wt	Wt	ddm1-2	Wt	Wt	Wt	Wt	Wt	Wt	ddm1-2	Wt	Wt	Wt	Wt	Wt	ddm1-2	Wt	ddm1-2	Wt
MM854	5	16657052	16658106	1054	47.3622	Wt	Wt	Wt	Wt	Wt	Wt	Wt	Wt	Wt	Wt	ddm1-2	Wt	Wt	Wt	Wt	Wt	ddm1-2	Wt	Wt	ddm1-2	Wt	Wt	Wt	Wt	Wt	Wt	Wt	ddm1-2	Wt	Wt	Wt	Wt	Wt	Wt	ddm1-2	Wt	Wt	Wt	Wt	Wt	ddm1-2	Wt	ddm1-2	Wt
MM859	5	17596738	17603243	6505	56.4498	Wt	Wt	Wt	Wt	Wt	Wt	Wt	Wt	Wt	Wt	ddm1-2	Wt	Wt	Wt	Wt	Wt	ddm1-2	Wt	Wt	ddm1-2	Wt	Wt	Wt	Wt	Wt	Wt	Wt	ddm1-2	Wt	Wt	Wt	Wt	Wt	Wt	ddm1-2	Wt	Wt	Wt	Wt	Wt	ddm1-2	Wt	ddm1-2	Wt
MM862	5	18471563	18471959	396	57.5829	Wt	Wt	Wt	Wt	Wt	Wt	Wt	Wt	Wt	Wt	Wt	Wt	Wt	Wt	Wt	Wt	ddm1-2	Wt	Wt	ddm1-2	Wt	Wt	Wt	Wt	Wt	Wt	Wt	ddm1-2	Wt	Wt	Wt	Wt	Wt	Wt	ddm1-2	Wt	Wt	Wt	Wt	Wt	ddm1-2	Wt	ddm1-2	Wt
MM863	5	18650434	18650767	333	59.9293	Wt	Wt	Wt	Wt	Wt	Wt	Wt	Wt	Wt	Wt	Wt	ddm1-2	Wt	Wt	Wt	Wt	ddm1-2	Wt	Wt	Wt	Wt	Wt	Wt	Wt	Wt	Wt	Wt	ddm1-2	Wt	Wt	Wt	Wt	Wt	Wt	Wt	Wt	Wt	Wt	Wt	Wt	ddm1-2	Wt	ddm1-2	Wt
MM865	5	19361091	19362115	1024	63.5786	Wt	Wt	Wt	Wt	Wt	Wt	Wt	Wt	Wt	Wt	Wt	ddm1-2	ddm1-2	Wt	Wt	Wt	ddm1-2	Wt	Wt	Wt	Wt	Wt	Wt	Wt	Wt	Wt	Wt	ddm1-2	Wt	Wt	Wt	Wt	Wt	Wt	Wt	Wt	Wt	Wt	Wt	Wt	ddm1-2	Wt	ddm1-2	Wt
MM867	5	21373923	21374973	1050	65.9251	Wt	Wt	Wt	Wt	Wt	Wt	Wt	Wt	Wt	Wt	Wt	ddm1-2	ddm1-2	Wt	Wt	Wt	ddm1-2	Wt	Wt	Wt	Wt	Wt	Wt	Wt	Wt	Wt	Wt	ddm1-2	Wt	Wt	Wt	Wt	Wt	Wt	Wt	Wt	Wt	ddm1-2	Wt	Wt	Wt	Wt	ddm1-2	Wt
% of DMR markers of the ddm1-2 haplotype :						0.238095	0.015873	0.111111	0.00793651	0	0.0873016	0.111111	0.00793651	0.0555556	0.015873	0.18254	0.0238095	0.015873	0.00793651	0.00793651	0.0714286	0.380952	0.0555556	0.166667	0.507937	0.0873016	0.111111	0.031746	0.031746	0.103175	0.031746	0.00793651	0.325397	0.214286	0.103175	0.0714286	0.0952381	0.190476	0.174603	0.277778	0.444444	0.119048	0.214286	0.206349	0.0555556	0.277778	0.15873	0.238095	0.285714
[truncated: 79 more columns]

## Sheet: S2
Linkage between shared transposition events (STEs) in the epiQTL interval of Chromosome 1 (epiQTL1) and Hpa resistance.
Interval1	Marker2	Location (bp)3	Lines sharing4	Phenotypic Model5	Marker β p-value6	Adjusted R2 6
QTL1	MM123	17256398	32	yi = β0 + β1(MM123)i + β2(MM240)i + β3(MM654)i + β4(MM823)i + εi	1.53e-05	0.5986
	ATENSPM3.1	12177578	13	yi = β0 + β1(ATENSPM3.1)i + β2(MM240)i + β3(MM654)i + β4(MM823)i + εi	0.297	0.5331
	ATENSPM3.2	12617099	14	yi = β0 + β1(ATENSPM3.2)i + β2(MM240)i + β3(MM654)i + β4(MM823)i + εi	0.412	0.5315
	ATENSPM3.3	16837097	8	yi = β0 + β1(ATENSPM3.3)i + β2(MM240)i + β3(MM654)i + β4(MM823)i + εi	0.0943	0.5399
1: No STEs were identified in the epiQTL intervals at chromosomes 2, 4 and 5 (LOD drop-off = 2).
2: Names of markers in the epiQTL1 interval. ATENSPM3-.1 - ATENSPEM3.3: names of STEs, MM123: name of the peak Differentiatlly Methylated Region (DMR).
3: Coordinates (bp) from the top of the chromosome of STE and peak DMR markers.
4: Number of epiRILs sharing the hypo-methylated DMR marker or STEs.
5: Multiple regression models used to calculate phenotypical contribution values (yi) by the markers.
6: Statistical significance (p-value) and correlation (Adjusted R2) between marker and resistance index (RI).

## Sheet: S3
Differentially expressed genes (DEGs) between all epiRIL/treatment/time-point combinations
AT1G01020	protein_coding_gene
AT1G01030	protein_coding_gene
AT1G01040	protein_coding_gene
AT1G01050	protein_coding_gene							Type	Count	Percentage of DEGs	Count in Arabidopsis Genome	DEGs as % of Arabidopsis genome annotation
AT1G01060	protein_coding_gene							Protein coding	18594	0.903982	35386	0.525462
AT1G01070	protein_coding_gene							Transposon	1382	0.0671885	3911	0.353362
AT1G01080	protein_coding_gene							Other	252	0.0122514	480	0.525
AT1G01090	protein_coding_gene							Pseudogene	184	0.0089455	926	0.198704
AT1G01100	protein_coding_gene							miRNA	55	0.00267393	180	0.305556
AT1G01110	protein_coding_gene							snoRNA	49	0.00238223	71	0.690141
AT1G01120	protein_coding_gene							tRNA	36	0.00175021	689	0.0522496
AT1G01130	protein_coding_gene							rRNA	10	0.000486169	15	0.666667
AT1G01140	protein_coding_gene							snRNA	7	0.000340318	13	0.538462
AT1G01160	protein_coding_gene
AT1G01170	protein_coding_gene							Total	20569		41671
AT1G01180	protein_coding_gene
AT1G01190	protein_coding_gene
AT1G01200	protein_coding_gene
AT1G01210	protein_coding_gene
AT1G01220	protein_coding_gene
AT1G01225	protein_coding_gene
AT1G01230	protein_coding_gene
AT1G01240	protein_coding_gene
AT1G01250	protein_coding_gene
AT1G01260	protein_coding_gene
AT1G01290	protein_coding_gene
AT1G01300	protein_coding_gene
AT1G01320	protein_coding_gene
AT1G01340	protein_coding_gene
AT1G01350	protein_coding_gene
AT1G01355	protein_coding_gene
AT1G01360	protein_coding_gene
AT1G01380	protein_coding_gene
AT1G01390	protein_coding_gene
AT1G01420	protein_coding_gene
AT1G01430	protein_coding_gene
AT1G01440	protein_coding_gene
AT1G01448	other_RNA
AT1G01453	protein_coding_gene
AT1G01470	protein_coding_gene
AT1G01480	protein_coding_gene
AT1G01490	protein_coding_gene
AT1G01500	protein_coding_gene
AT1G01510	protein_coding_gene
AT1G01520	protein_coding_gene
AT1G01530	protein_coding_gene
AT1G01540	protein_coding_gene
AT1G01550	protein_coding_gene
AT1G01560	protein_coding_gene
AT1G01570	protein_coding_gene
AT1G01580	protein_coding_gene
AT1G01590	protein_coding_gene
AT1G01610	protein_coding_gene
AT1G01620	protein_coding_gene
AT1G01630	protein_coding_gene
AT1G01650	protein_coding_gene
AT1G01660	protein_coding_gene
AT1G01670	protein_coding_gene
AT1G01680	protein_coding_gene
AT1G01690	protein_coding_gene
AT1G01700	protein_coding_gene
AT1G01710	protein_coding_gene
AT1G01725	protein_coding_gene
AT1G01730	protein_coding_gene
AT1G01740	protein_coding_gene
AT1G01760	protein_coding_gene
AT1G01770	protein_coding_gene
AT1G01780	protein_coding_gene
AT1G01790	protein_coding_gene
AT1G01800	protein_coding_gene
AT1G01820	protein_coding_gene
AT1G01830	protein_coding_gene
AT1G01840	protein_coding_gene
AT1G01860	protein_coding_gene
AT1G01880	protein_coding_gene
AT1G01900	protein_coding_gene
AT1G01910	protein_coding_gene
AT1G01920	protein_coding_gene
AT1G01930	protein_coding_gene
AT1G01940	protein_coding_gene
AT1G01950	protein_coding_gene
AT1G01960	protein_coding_gene
AT1G01970	protein_coding_gene
AT1G01990	protein_coding_gene
AT1G02000	protein_coding_gene
AT1G02010	protein_coding_gene
AT1G02050	protein_coding_gene
AT1G02060	protein_coding_gene
AT1G02080	protein_coding_gene
AT1G02090	protein_coding_gene
AT1G02100	protein_coding_gene
AT1G02110	protein_coding_gene
AT1G02120	protein_coding_gene
AT1G02130	protein_coding_gene
AT1G02140	protein_coding_gene
AT1G02145	protein_coding_gene
AT1G02150	protein_coding_gene
AT1G02160	protein_coding_gene
AT1G02170	protein_coding_gene
AT1G02180	protein_coding_gene
AT1G02190	protein_coding_gene
AT1G02220	protein_coding_gene
AT1G02230	protein_coding_gene
AT1G02250	protein_coding_gene
AT1G02260	protein_coding_gene
AT1G02270	protein_coding_gene
AT1G02280	protein_coding_gene
AT1G02300	protein_coding_gene
AT1G02305	protein_coding_gene
AT1G02330	protein_coding_gene
AT1G02335	protein_coding_gene
AT1G02340	protein_coding_gene
AT1G02350	protein_coding_gene
AT1G02360	protein_coding_gene
AT1G02370	protein_coding_gene
AT1G02380	protein_coding_gene
AT1G02390	protein_coding_gene
AT1G02400	protein_coding_gene
AT1G02410	protein_coding_gene
AT1G02430	protein_coding_gene
AT1G02440	protein_coding_gene
AT1G02450	protein_coding_gene
AT1G02460	protein_coding_gene
AT1G02470	protein_coding_gene
AT1G02475	protein_coding_gene
AT1G02500	protein_coding_gene
AT1G02520	protein_coding_gene
AT1G02560	protein_coding_gene
AT1G02580	protein_coding_gene
AT1G02610	protein_coding_gene
AT1G02620	protein_coding_gene
AT1G02640	protein_coding_gene
AT1G02650	protein_coding_gene
AT1G02660	protein_coding_gene
AT1G02670	protein_coding_gene
AT1G02680	protein_coding_gene
AT1G02690	protein_coding_gene
AT1G02700	protein_coding_gene
AT1G02720	protein_coding_gene
AT1G02730	protein_coding_gene
AT1G02740	protein_coding_gene
AT1G02770	protein_coding_gene
AT1G02780	protein_coding_gene
AT1G02800	protein_coding_gene
AT1G02810	protein_coding_gene
AT1G02820	protein_coding_gene
AT1G02840	protein_coding_gene
AT1G02850	protein_coding_gene
AT1G02860	protein_coding_gene
AT1G02870	protein_coding_gene
AT1G02880	protein_coding_gene
AT1G02900	protein_coding_gene
AT1G02910	protein_coding_gene
AT1G02920	protein_coding_gene
AT1G02930	protein_coding_gene
AT1G02940	protein_coding_gene
AT1G02950	protein_coding_gene
AT1G02960	protein_coding_gene
AT1G02970	protein_coding_gene
AT1G02990	protein_coding_gene
AT1G03000	protein_coding_gene
AT1G03010	protein_coding_gene
AT1G03020	protein_coding_gene
AT1G03030	protein_coding_gene
AT1G03040	protein_coding_gene
AT1G03055	protein_coding_gene
AT1G03060	protein_coding_gene
AT1G03070	protein_coding_gene
AT1G03080	protein_coding_gene
AT1G03090	protein_coding_gene
AT1G03100	protein_coding_gene
AT1G03106	protein_coding_gene
AT1G03110	protein_coding_gene
AT1G03130	protein_coding_gene
AT1G03140	protein_coding_gene
AT1G03150	protein_coding_gene
AT1G03160	protein_coding_gene
AT1G03170	protein_coding_gene
AT1G03180	protein_coding_gene
AT1G03190	protein_coding_gene
AT1G03210	protein_coding_gene
AT1G03220	protein_coding_gene
AT1G03230	protein_coding_gene
AT1G03250	protein_coding_gene
AT1G03270	protein_coding_gene
AT1G03280	protein_coding_gene
AT1G03290	protein_coding_gene
AT1G03300	protein_coding_gene
AT1G03310	protein_coding_gene
AT1G03330	protein_coding_gene
AT1G03340	protein_coding_gene
AT1G03350	protein_coding_gene
AT1G03360	protein_coding_gene
AT1G03365	protein_coding_gene
AT1G03370	protein_coding_gene
AT1G03380	protein_coding_gene
AT1G03400	protein_coding_gene
AT1G03410	protein_coding_gene
AT1G03420	transposable_element_gene
AT1G03430	protein_coding_gene
AT1G03440	protein_coding_gene
AT1G03457	protein_coding_gene
AT1G03470	protein_coding_gene
AT1G03475	protein_coding_gene
AT1G03495	protein_coding_gene
AT1G03502	snoRNA
AT1G03506	snoRNA
AT1G03510	protein_coding_gene
AT1G03520	protein_coding_gene
AT1G03530	protein_coding_gene
AT1G03540	protein_coding_gene
AT1G03550	protein_coding_gene
AT1G03560	protein_coding_gene
AT1G03580	pseudogene
AT1G03590	protein_coding_gene
AT1G03600	protein_coding_gene
AT1G03610	protein_coding_gene
AT1G03620	protein_coding_gene
AT1G03630	protein_coding_gene
AT1G03650	protein_coding_gene
AT1G03660	protein_coding_gene
AT1G03680	protein_coding_gene
AT1G03687	protein_coding_gene
AT1G03730	protein_coding_gene
AT1G03740	protein_coding_gene
AT1G03743	snoRNA
AT1G03746	snoRNA
AT1G03750	protein_coding_gene
AT1G03760	protein_coding_gene
AT1G03770	protein_coding_gene
AT1G03780	protein_coding_gene
AT1G03820	protein_coding_gene
AT1G03830	protein_coding_gene
AT1G03840	protein_coding_gene
AT1G03850	protein_coding_gene
AT1G03860	protein_coding_gene
AT1G03870	protein_coding_gene
AT1G03900	protein_coding_gene
AT1G03905	protein_coding_gene
AT1G03910	protein_coding_gene
AT1G03920	protein_coding_gene
AT1G03930	protein_coding_gene
AT1G03935	snoRNA
AT1G03950	protein_coding_gene
AT1G03960	protein_coding_gene
AT1G03970	protein_coding_gene
AT1G03980	protein_coding_gene
AT1G04000	protein_coding_gene
AT1G04010	protein_coding_gene
AT1G04030	protein_coding_gene
AT1G04040	protein_coding_gene
AT1G04050	protein_coding_gene
AT1G04070	protein_coding_gene
AT1G04080	protein_coding_gene
AT1G04100	protein_coding_gene
AT1G04110	protein_coding_gene
AT1G04120	protein_coding_gene
AT1G04130	protein_coding_gene
AT1G04140	protein_coding_gene
AT1G04160	protein_coding_gene
AT1G04170	protein_coding_gene
AT1G04180	protein_coding_gene
AT1G04190	protein_coding_gene
AT1G04200	protein_coding_gene
AT1G04210	protein_coding_gene
AT1G04220	protein_coding_gene
AT1G04230	protein_coding_gene
AT1G04240	protein_coding_gene
AT1G04250	protein_coding_gene
AT1G04260	protein_coding_gene
AT1G04270	protein_coding_gene
AT1G04280	protein_coding_gene
AT1G04290	protein_coding_gene
AT1G04295	other_RNA
AT1G04300	protein_coding_gene
AT1G04310	protein_coding_gene
AT1G04340	protein_coding_gene
AT1G04350	protein_coding_gene
AT1G04360	protein_coding_gene
AT1G04400	protein_coding_gene
AT1G04410	protein_coding_gene
AT1G04420	protein_coding_gene
AT1G04430	protein_coding_gene
AT1G04440	protein_coding_gene
AT1G04480	protein_coding_gene
AT1G04490	protein_coding_gene
AT1G04500	protein_coding_gene
AT1G04510	protein_coding_gene
AT1G04520	protein_coding_gene
AT1G04530	protein_coding_gene
AT1G04540	protein_coding_gene
AT1G04550	protein_coding_gene
AT1G04555	protein_coding_gene
AT1G04570	protein_coding_gene
AT1G04590	protein_coding_gene
AT1G04600	protein_coding_gene
AT1G04620	protein_coding_gene
AT1G04635	protein_coding_gene
AT1G04640	protein_coding_gene
AT1G04650	protein_coding_gene
AT1G04680	protein_coding_gene
AT1G04690	protein_coding_gene
AT1G04700	protein_coding_gene
AT1G04710	protein_coding_gene
AT1G04750	protein_coding_gene
AT1G04760	protein_coding_gene
AT1G04770	protein_coding_gene
AT1G04780	protein_coding_gene
AT1G04790	protein_coding_gene
AT1G04800	protein_coding_gene
AT1G04810	protein_coding_gene
AT1G04820	protein_coding_gene
AT1G04840	protein_coding_gene
AT1G04850	protein_coding_gene
AT1G04860	protein_coding_gene
AT1G04880	protein_coding_gene
AT1G04900	protein_coding_gene
AT1G04910	protein_coding_gene
AT1G04920	protein_coding_gene
AT1G04930	protein_coding_gene
AT1G04945	protein_coding_gene
AT1G04950	protein_coding_gene
AT1G04960	protein_coding_gene
AT1G04970	protein_coding_gene
AT1G04980	protein_coding_gene
AT1G04985	protein_coding_gene
AT1G04990	protein_coding_gene
AT1G05000	protein_coding_gene
AT1G05010	protein_coding_gene
AT1G05020	protein_coding_gene
AT1G05030	protein_coding_gene
AT1G05055	protein_coding_gene
AT1G05060	protein_coding_gene
AT1G05065	protein_coding_gene
AT1G05070	protein_coding_gene
AT1G05080	protein_coding_gene
AT1G05120	protein_coding_gene
AT1G05135	pseudogene
AT1G05140	protein_coding_gene
AT1G05150	protein_coding_gene
AT1G05170	protein_coding_gene
AT1G05180	protein_coding_gene
AT1G05190	protein_coding_gene
AT1G05200	protein_coding_gene
AT1G05205	protein_coding_gene
AT1G05210	protein_coding_gene
AT1G05220	protein_coding_gene
AT1G05230	protein_coding_gene
AT1G05270	protein_coding_gene
AT1G05300	protein_coding_gene
AT1G05310	protein_coding_gene
AT1G05320	protein_coding_gene
AT1G05330	protein_coding_gene
AT1G05340	protein_coding_gene
AT1G05350	protein_coding_gene
AT1G05360	protein_coding_gene
AT1G05370	protein_coding_gene
AT1G05380	protein_coding_gene
AT1G05385	protein_coding_gene
AT1G05400	protein_coding_gene
AT1G05410	protein_coding_gene
AT1G05430	protein_coding_gene
AT1G05460	protein_coding_gene
AT1G05470	protein_coding_gene
AT1G05500	protein_coding_gene
AT1G05520	protein_coding_gene
AT1G05540	protein_coding_gene
AT1G05550	protein_coding_gene
AT1G05560	protein_coding_gene
AT1G05562	other_RNA
AT1G05570	protein_coding_gene
AT1G05575	protein_coding_gene
AT1G05590	protein_coding_gene
AT1G05600	protein_coding_gene
AT1G05610	protein_coding_gene
AT1G05620	protein_coding_gene
AT1G05630	protein_coding_gene
AT1G05640	protein_coding_gene
AT1G05670	protein_coding_gene
AT1G05675	protein_coding_gene
AT1G05680	protein_coding_gene
AT1G05690	protein_coding_gene
AT1G05700	protein_coding_gene
AT1G05710	protein_coding_gene
AT1G05720	protein_coding_gene
AT1G05730	protein_coding_gene
AT1G05750	protein_coding_gene
AT1G05760	protein_coding_gene
AT1G05780	protein_coding_gene
AT1G05785	protein_coding_gene
AT1G05790	protein_coding_gene
AT1G05805	protein_coding_gene
AT1G05810	protein_coding_gene
AT1G05820	protein_coding_gene
AT1G05830	protein_coding_gene
AT1G05835	protein_coding_gene
AT1G05840	protein_coding_gene
AT1G05850	protein_coding_gene
AT1G05860	protein_coding_gene
AT1G05870	protein_coding_gene
AT1G05880	protein_coding_gene
AT1G05890	protein_coding_gene
AT1G05900	protein_coding_gene
AT1G05910	protein_coding_gene
AT1G05940	protein_coding_gene
AT1G05950	protein_coding_gene
AT1G05960	protein_coding_gene
AT1G05970	protein_coding_gene
AT1G06000	protein_coding_gene
AT1G06002	other_RNA
AT1G06010	protein_coding_gene
AT1G06020	protein_coding_gene
AT1G06030	protein_coding_gene
AT1G06040	protein_coding_gene
AT1G06050	protein_coding_gene
AT1G06060	protein_coding_gene
AT1G06080	protein_coding_gene
AT1G06110	protein_coding_gene
AT1G06130	protein_coding_gene
AT1G06135	protein_coding_gene
AT1G06140	protein_coding_gene
AT1G06148	protein_coding_gene
AT1G06150	protein_coding_gene
AT1G06160	protein_coding_gene
AT1G06180	protein_coding_gene
AT1G06190	protein_coding_gene
AT1G06200	protein_coding_gene
AT1G06210	protein_coding_gene
AT1G06220	protein_coding_gene
AT1G06230	protein_coding_gene
AT1G06240	protein_coding_gene
AT1G06270	protein_coding_gene
AT1G06290	protein_coding_gene
AT1G06360	protein_coding_gene
AT1G06370	pseudogene
AT1G06380	protein_coding_gene
AT1G06390	protein_coding_gene
AT1G06400	protein_coding_gene
AT1G06430	protein_coding_gene
AT1G06440	protein_coding_gene
AT1G06450	protein_coding_gene
AT1G06460	protein_coding_gene
AT1G06470	protein_coding_gene
AT1G06475	protein_coding_gene
AT1G06490	protein_coding_gene
AT1G06500	protein_coding_gene
AT1G06510	protein_coding_gene
AT1G06520	protein_coding_gene
AT1G06530	protein_coding_gene
AT1G06550	protein_coding_gene
AT1G06560	protein_coding_gene
AT1G06570	protein_coding_gene
AT1G06580	protein_coding_gene
AT1G06590	protein_coding_gene
AT1G06620	protein_coding_gene
AT1G06630	protein_coding_gene
AT1G06640	protein_coding_gene
AT1G06645	protein_coding_gene
AT1G06650	protein_coding_gene
AT1G06660	protein_coding_gene
AT1G06670	protein_coding_gene
AT1G06680	protein_coding_gene
AT1G06690	protein_coding_gene
AT1G06700	protein_coding_gene
AT1G06710	protein_coding_gene
AT1G06720	protein_coding_gene
AT1G06730	protein_coding_gene
AT1G06740	transposable_element_gene
AT1G06760	protein_coding_gene
AT1G06780	protein_coding_gene
AT1G06790	protein_coding_gene
AT1G06800	protein_coding_gene
AT1G06820	protein_coding_gene
AT1G06830	protein_coding_gene
AT1G06840	protein_coding_gene
AT1G06860	tRNA
AT1G06870	protein_coding_gene
AT1G06880	tRNA
AT1G06890	protein_coding_gene
AT1G06900	protein_coding_gene
AT1G06925	protein_coding_gene
AT1G06950	protein_coding_gene
AT1G06960	protein_coding_gene
AT1G06980	protein_coding_gene
AT1G07000	protein_coding_gene
AT1G07010	protein_coding_gene
AT1G07020	protein_coding_gene
AT1G07030	protein_coding_gene
AT1G07040	protein_coding_gene
AT1G07050	protein_coding_gene
AT1G07070	protein_coding_gene
AT1G07090	protein_coding_gene
AT1G07110	protein_coding_gene
AT1G07119	other_RNA
AT1G07128	other_RNA
AT1G07135	protein_coding_gene
AT1G07140	protein_coding_gene
AT1G07150	protein_coding_gene
AT1G07160	protein_coding_gene
AT1G07170	protein_coding_gene
AT1G07180	protein_coding_gene
AT1G07200	protein_coding_gene
AT1G07210	protein_coding_gene
AT1G07220	protein_coding_gene
AT1G07230	protein_coding_gene
AT1G07240	protein_coding_gene
AT1G07250	protein_coding_gene
AT1G07260	protein_coding_gene
AT1G07280	protein_coding_gene
AT1G07290	protein_coding_gene
AT1G07300	protein_coding_gene
AT1G07310	protein_coding_gene
AT1G07320	protein_coding_gene
AT1G07330	protein_coding_gene
AT1G07350	protein_coding_gene
AT1G07360	protein_coding_gene
AT1G07380	protein_coding_gene
AT1G07390	protein_coding_gene
AT1G07400	protein_coding_gene
AT1G07420	protein_coding_gene
AT1G07430	protein_coding_gene
AT1G07440	protein_coding_gene
AT1G07450	protein_coding_gene
AT1G07470	protein_coding_gene
AT1G07480	protein_coding_gene
AT1G07485	protein_coding_gene
AT1G07490	protein_coding_gene
AT1G07500	protein_coding_gene
AT1G07510	protein_coding_gene
AT1G07520	protein_coding_gene
AT1G07530	protein_coding_gene
AT1G07570	protein_coding_gene
AT1G07590	protein_coding_gene
AT1G07610	protein_coding_gene
AT1G07615	protein_coding_gene
AT1G07620	protein_coding_gene
AT1G07630	protein_coding_gene
AT1G07640	protein_coding_gene
AT1G07650	protein_coding_gene
AT1G07670	protein_coding_gene
AT1G07700	protein_coding_gene
AT1G07705	protein_coding_gene
AT1G07720	protein_coding_gene
AT1G07728	other_RNA
AT1G07740	protein_coding_gene
AT1G07745	protein_coding_gene
AT1G07750	protein_coding_gene
AT1G07770	protein_coding_gene
AT1G07780	protein_coding_gene
AT1G07790	protein_coding_gene
AT1G07810	protein_coding_gene
AT1G07820	protein_coding_gene
AT1G07840	protein_coding_gene
AT1G07870	protein_coding_gene
AT1G07880	protein_coding_gene
AT1G07890	protein_coding_gene
AT1G07900	protein_coding_gene
AT1G07910	protein_coding_gene
AT1G07920	protein_coding_gene
AT1G07930	protein_coding_gene
AT1G07940	protein_coding_gene
AT1G07950	protein_coding_gene
AT1G07960	protein_coding_gene
AT1G07980	protein_coding_gene
AT1G07990	protein_coding_gene
AT1G08000	protein_coding_gene
AT1G08010	protein_coding_gene
AT1G08030	protein_coding_gene
AT1G08040	protein_coding_gene
AT1G08050	protein_coding_gene
AT1G08060	protein_coding_gene
AT1G08070	protein_coding_gene
AT1G08090	protein_coding_gene
AT1G08110	protein_coding_gene
AT1G08120	protein_coding_gene
AT1G08125	protein_coding_gene
AT1G08130	protein_coding_gene
AT1G08160	protein_coding_gene
AT1G08165	protein_coding_gene
AT1G08170	protein_coding_gene
AT1G08180	protein_coding_gene
AT1G08190	protein_coding_gene
AT1G08200	protein_coding_gene
AT1G08210	protein_coding_gene
AT1G08220	protein_coding_gene
AT1G08230	protein_coding_gene
AT1G08250	protein_coding_gene
AT1G08260	protein_coding_gene
AT1G08280	protein_coding_gene
AT1G08300	protein_coding_gene
AT1G08310	protein_coding_gene
AT1G08315	protein_coding_gene
AT1G08320	protein_coding_gene
AT1G08350	protein_coding_gene
AT1G08360	protein_coding_gene
AT1G08370	protein_coding_gene
AT1G08380	protein_coding_gene
AT1G08390	protein_coding_gene
AT1G08400	protein_coding_gene
AT1G08410	protein_coding_gene
AT1G08420	protein_coding_gene
AT1G08450	protein_coding_gene
AT1G08460	protein_coding_gene
AT1G08465	protein_coding_gene
AT1G08470	protein_coding_gene
AT1G08480	protein_coding_gene
AT1G08490	protein_coding_gene
AT1G08500	protein_coding_gene
AT1G08510	protein_coding_gene
AT1G08520	protein_coding_gene
AT1G08530	protein_coding_gene
AT1G08540	protein_coding_gene
AT1G08550	protein_coding_gene
AT1G08560	protein_coding_gene
AT1G08570	protein_coding_gene
AT1G08580	protein_coding_gene
AT1G08592	other_RNA
AT1G08600	protein_coding_gene
AT1G08610	protein_coding_gene
AT1G08620	protein_coding_gene
AT1G08630	protein_coding_gene
AT1G08640	protein_coding_gene
AT1G08650	protein_coding_gene
AT1G08660	protein_coding_gene
AT1G08680	protein_coding_gene
AT1G08700	protein_coding_gene
AT1G08710	protein_coding_gene
AT1G08720	protein_coding_gene
AT1G08730	protein_coding_gene
AT1G08740	transposable_element_gene
AT1G08750	protein_coding_gene
AT1G08760	protein_coding_gene
AT1G08770	protein_coding_gene
AT1G08800	protein_coding_gene
AT1G08810	protein_coding_gene
AT1G08820	protein_coding_gene
AT1G08830	protein_coding_gene
AT1G08840	protein_coding_gene
AT1G08845	protein_coding_gene
AT1G08860	protein_coding_gene
AT1G08880	protein_coding_gene
AT1G08890	protein_coding_gene
AT1G08900	protein_coding_gene
AT1G08910	protein_coding_gene
AT1G08920	protein_coding_gene
AT1G08930	protein_coding_gene
AT1G08940	protein_coding_gene
AT1G08970	protein_coding_gene
AT1G08980	protein_coding_gene
AT1G09010	protein_coding_gene
AT1G09020	protein_coding_gene
AT1G09040	protein_coding_gene
AT1G09050	protein_coding_gene
AT1G09060	protein_coding_gene
AT1G09070	protein_coding_gene
AT1G09080	protein_coding_gene
AT1G09090	protein_coding_gene
AT1G09100	protein_coding_gene
AT1G09130	protein_coding_gene
AT1G09140	protein_coding_gene
AT1G09160	protein_coding_gene
AT1G09180	protein_coding_gene
AT1G09190	protein_coding_gene
AT1G09195	protein_coding_gene
AT1G09200	protein_coding_gene
AT1G09210	protein_coding_gene
AT1G09220	protein_coding_gene
AT1G09230	protein_coding_gene
AT1G09240	protein_coding_gene
AT1G09250	protein_coding_gene
AT1G09260	protein_coding_gene
AT1G09270	protein_coding_gene
AT1G09280	protein_coding_gene
AT1G09300	protein_coding_gene
AT1G09310	protein_coding_gene
AT1G09320	protein_coding_gene
AT1G09330	protein_coding_gene
AT1G09340	protein_coding_gene
AT1G09350	protein_coding_gene
AT1G09390	protein_coding_gene
AT1G09400	protein_coding_gene
AT1G09410	protein_coding_gene
AT1G09415	protein_coding_gene
AT1G09420	protein_coding_gene
AT1G09421	other_RNA
AT1G09430	protein_coding_gene
AT1G09440	protein_coding_gene
AT1G09450	protein_coding_gene
AT1G09460	protein_coding_gene
AT1G09480	protein_coding_gene
AT1G09486	pseudogene
AT1G09490	protein_coding_gene
AT1G09500	protein_coding_gene
AT1G09520	protein_coding_gene
AT1G09530	protein_coding_gene
AT1G09560	protein_coding_gene
AT1G09570	protein_coding_gene
AT1G09575	protein_coding_gene
AT1G09590	protein_coding_gene
AT1G09610	protein_coding_gene
AT1G09620	protein_coding_gene
AT1G09630	protein_coding_gene
AT1G09640	protein_coding_gene
AT1G09645	protein_coding_gene
AT1G09650	protein_coding_gene
AT1G09660	protein_coding_gene
AT1G09680	protein_coding_gene
AT1G09690	protein_coding_gene
AT1G09700	protein_coding_gene
AT1G09710	protein_coding_gene
AT1G09730	protein_coding_gene
AT1G09740	protein_coding_gene
AT1G09750	protein_coding_gene
AT1G09760	protein_coding_gene
AT1G09770	protein_coding_gene
AT1G09780	protein_coding_gene
AT1G09794	protein_coding_gene
AT1G09795	protein_coding_gene
AT1G09800	protein_coding_gene
AT1G09810	protein_coding_gene
AT1G09812	protein_coding_gene
AT1G09815	protein_coding_gene
AT1G09820	protein_coding_gene
AT1G09830	protein_coding_gene
AT1G09840	protein_coding_gene
AT1G09850	protein_coding_gene
AT1G09870	protein_coding_gene
AT1G09890	protein_coding_gene
AT1G09900	protein_coding_gene
AT1G09910	protein_coding_gene
AT1G09920	protein_coding_gene
AT1G09930	protein_coding_gene
AT1G09932	protein_coding_gene
AT1G09935	protein_coding_gene
AT1G09940	protein_coding_gene
AT1G09950	protein_coding_gene
AT1G09970	protein_coding_gene
AT1G09980	protein_coding_gene
AT1G10000	protein_coding_gene
AT1G10020	protein_coding_gene
AT1G10030	protein_coding_gene
AT1G10040	protein_coding_gene
AT1G10050	protein_coding_gene
AT1G10060	protein_coding_gene
AT1G10070	protein_coding_gene
AT1G10090	protein_coding_gene
AT1G10095	protein_coding_gene
AT1G10120	protein_coding_gene
AT1G10130	protein_coding_gene
AT1G10140	protein_coding_gene
AT1G10150	protein_coding_gene
AT1G10155	protein_coding_gene
AT1G10160	transposable_element_gene
AT1G10170	protein_coding_gene
AT1G10180	protein_coding_gene
AT1G10200	protein_coding_gene
AT1G10210	protein_coding_gene
AT1G10230	protein_coding_gene
AT1G10240	protein_coding_gene
AT1G10270	protein_coding_gene
AT1G10280	protein_coding_gene
AT1G10290	protein_coding_gene
AT1G10310	protein_coding_gene
AT1G10320	protein_coding_gene
AT1G10330	protein_coding_gene
AT1G10340	protein_coding_gene
AT1G10350	protein_coding_gene
AT1G10360	protein_coding_gene
AT1G10370	protein_coding_gene
AT1G10380	protein_coding_gene
AT1G10410	protein_coding_gene
AT1G10417	protein_coding_gene
AT1G10430	protein_coding_gene
AT1G10450	protein_coding_gene
AT1G10460	protein_coding_gene
AT1G10470	protein_coding_gene
AT1G10490	protein_coding_gene
AT1G10500	protein_coding_gene
AT1G10510	protein_coding_gene
AT1G10522	protein_coding_gene
AT1G10550	protein_coding_gene
AT1G10560	protein_coding_gene
AT1G10570	protein_coding_gene
AT1G10580	protein_coding_gene
AT1G10590	protein_coding_gene
AT1G10600	protein_coding_gene
AT1G10610	protein_coding_gene
AT1G10630	protein_coding_gene
AT1G10640	protein_coding_gene
AT1G10650	protein_coding_gene
AT1G10657	protein_coding_gene
AT1G10660	protein_coding_gene
AT1G10670	protein_coding_gene
AT1G10682	other_RNA
AT1G10690	protein_coding_gene
AT1G10700	protein_coding_gene
AT1G10720	protein_coding_gene
AT1G10730	protein_coding_gene
AT1G10740	protein_coding_gene
AT1G10750	protein_coding_gene
AT1G10760	protein_coding_gene
AT1G10780	protein_coding_gene
AT1G10820	protein_coding_gene
AT1G10830	protein_coding_gene
AT1G10840	protein_coding_gene
AT1G10850	protein_coding_gene
AT1G10865	protein_coding_gene
AT1G10870	protein_coding_gene
AT1G10890	protein_coding_gene
AT1G10900	protein_coding_gene
AT1G10910	protein_coding_gene
AT1G10920	protein_coding_gene
AT1G10930	protein_coding_gene
AT1G10940	protein_coding_gene
AT1G10960	protein_coding_gene
AT1G10990	protein_coding_gene
AT1G11000	protein_coding_gene
AT1G11020	protein_coding_gene
AT1G11050	protein_coding_gene
AT1G11060	protein_coding_gene
AT1G11070	protein_coding_gene
AT1G11080	protein_coding_gene
AT1G11090	protein_coding_gene
AT1G11100	protein_coding_gene
AT1G11125	protein_coding_gene
AT1G11130	protein_coding_gene
AT1G11150	transposable_element_gene
AT1G11160	protein_coding_gene
AT1G11170	protein_coding_gene
AT1G11175	other_RNA
AT1G11180	protein_coding_gene
AT1G11185	other_RNA
AT1G11190	protein_coding_gene
AT1G11200	protein_coding_gene
AT1G11210	protein_coding_gene
AT1G11240	protein_coding_gene
AT1G11260	protein_coding_gene
AT1G11270	protein_coding_gene
AT1G11280	protein_coding_gene
AT1G11290	protein_coding_gene
AT1G11300	protein_coding_gene
AT1G11310	protein_coding_gene
AT1G11320	protein_coding_gene
AT1G11330	protein_coding_gene
AT1G11340	protein_coding_gene
AT1G11350	protein_coding_gene
AT1G11360	protein_coding_gene
AT1G11380	protein_coding_gene
AT1G11390	protein_coding_gene
AT1G11400	protein_coding_gene
AT1G11410	protein_coding_gene
AT1G11430	protein_coding_gene
AT1G11440	protein_coding_gene
AT1G11450	protein_coding_gene
AT1G11475	protein_coding_gene
AT1G11480	protein_coding_gene
AT1G11500	protein_coding_gene
AT1G11530	protein_coding_gene
AT1G11540	protein_coding_gene
AT1G11545	protein_coding_gene
AT1G11580	protein_coding_gene
AT1G11592	other_RNA
AT1G11600	protein_coding_gene
AT1G11610	protein_coding_gene
AT1G11630	protein_coding_gene
AT1G11650	protein_coding_gene
AT1G11660	protein_coding_gene
AT1G11670	protein_coding_gene
AT1G11700	protein_coding_gene
AT1G11710	protein_coding_gene
AT1G11720	protein_coding_gene
AT1G11735	miRNA
AT1G11740	protein_coding_gene
AT1G11750	protein_coding_gene
AT1G11755	protein_coding_gene
AT1G11780	protein_coding_gene
AT1G11790	protein_coding_gene
AT1G11800	protein_coding_gene
AT1G11810	protein_coding_gene
AT1G11820	protein_coding_gene
AT1G11840	protein_coding_gene
AT1G11860	protein_coding_gene
AT1G11870	protein_coding_gene
AT1G11880	protein_coding_gene
AT1G11890	protein_coding_gene
AT1G11900	protein_coding_gene
AT1G11905	protein_coding_gene
AT1G11910	protein_coding_gene
AT1G11915	protein_coding_gene
AT1G11930	protein_coding_gene
AT1G11940	protein_coding_gene
AT1G11950	protein_coding_gene
AT1G11960	protein_coding_gene
AT1G11990	protein_coding_gene
AT1G12000	protein_coding_gene
AT1G12010	protein_coding_gene
AT1G12013	snoRNA
AT1G12020	protein_coding_gene
AT1G12030	protein_coding_gene
AT1G12050	protein_coding_gene
AT1G12060	protein_coding_gene
AT1G12080	protein_coding_gene
AT1G12090	protein_coding_gene
AT1G12100	protein_coding_gene
AT1G12110	protein_coding_gene
AT1G12120	protein_coding_gene
AT1G12140	protein_coding_gene
AT1G12160	protein_coding_gene
AT1G12180	protein_coding_gene
AT1G12200	protein_coding_gene
AT1G12210	protein_coding_gene
AT1G12220	protein_coding_gene
AT1G12230	protein_coding_gene
AT1G12240	protein_coding_gene
AT1G12244	protein_coding_gene
AT1G12250	protein_coding_gene
AT1G12260	protein_coding_gene
AT1G12270	protein_coding_gene
AT1G12280	protein_coding_gene
AT1G12290	protein_coding_gene
AT1G12300	protein_coding_gene
AT1G12310	protein_coding_gene
AT1G12320	protein_coding_gene
AT1G12330	protein_coding_gene
AT1G12340	protein_coding_gene
AT1G12350	protein_coding_gene
AT1G12360	protein_coding_gene
AT1G12370	protein_coding_gene
AT1G12380	protein_coding_gene
AT1G12390	protein_coding_gene
AT1G12400	protein_coding_gene
AT1G12410	protein_coding_gene
AT1G12430	protein_coding_gene
AT1G12440	protein_coding_gene
AT1G12450	protein_coding_gene
AT1G12460	protein_coding_gene
AT1G12470	protein_coding_gene
AT1G12490	protein_coding_gene
AT1G12500	protein_coding_gene
AT1G12520	protein_coding_gene
AT1G12550	protein_coding_gene
AT1G12570	protein_coding_gene
AT1G12580	protein_coding_gene
AT1G12610	protein_coding_gene
AT1G12620	protein_coding_gene
AT1G12630	protein_coding_gene
AT1G12640	protein_coding_gene
AT1G12650	protein_coding_gene
AT1G12680	protein_coding_gene
AT1G12700	protein_coding_gene
AT1G12710	protein_coding_gene
AT1G12720	transposable_element_gene
AT1G12725	transposable_element_gene
AT1G12730	protein_coding_gene
AT1G12750	protein_coding_gene
AT1G12760	protein_coding_gene
AT1G12770	protein_coding_gene
AT1G12775	protein_coding_gene
AT1G12780	protein_coding_gene
AT1G12790	protein_coding_gene
AT1G12800	protein_coding_gene
AT1G12810	protein_coding_gene
AT1G12820	protein_coding_gene
AT1G12830	protein_coding_gene
AT1G12840	protein_coding_gene
AT1G12845	protein_coding_gene
AT1G12850	protein_coding_gene
AT1G12860	protein_coding_gene
AT1G12870	protein_coding_gene
AT1G12880	protein_coding_gene
AT1G12900	protein_coding_gene
AT1G12910	protein_coding_gene
AT1G12920	protein_coding_gene
AT1G12940	protein_coding_gene
AT1G12970	protein_coding_gene
AT1G12990	protein_coding_gene
AT1G13000	protein_coding_gene
AT1G13020	protein_coding_gene
AT1G13030	protein_coding_gene
AT1G13040	protein_coding_gene
AT1G13050	protein_coding_gene
AT1G13060	protein_coding_gene
AT1G13080	protein_coding_gene
AT1G13090	protein_coding_gene
AT1G13100	protein_coding_gene
AT1G13110	protein_coding_gene
AT1G13120	protein_coding_gene
AT1G13160	protein_coding_gene
AT1G13170	protein_coding_gene
AT1G13180	protein_coding_gene
AT1G13190	protein_coding_gene
AT1G13195	protein_coding_gene
AT1G13210	protein_coding_gene
AT1G13220	protein_coding_gene
AT1G13230	protein_coding_gene
AT1G13245	protein_coding_gene
AT1G13250	protein_coding_gene
AT1G13260	protein_coding_gene
AT1G13270	protein_coding_gene
AT1G13280	protein_coding_gene
AT1G13300	protein_coding_gene
AT1G13310	protein_coding_gene
AT1G13320	protein_coding_gene
AT1G13330	protein_coding_gene
AT1G13340	protein_coding_gene
AT1G13360	protein_coding_gene
AT1G13370	protein_coding_gene
AT1G13380	protein_coding_gene
AT1G13390	protein_coding_gene
AT1G13410	protein_coding_gene
AT1G13430	protein_coding_gene
AT1G13440	protein_coding_gene
AT1G13448	other_RNA
AT1G13450	protein_coding_gene
AT1G13460	protein_coding_gene
AT1G13470	protein_coding_gene
AT1G13480	protein_coding_gene
AT1G13520	protein_coding_gene
AT1G13530	protein_coding_gene
AT1G13540	protein_coding_gene
AT1G13550	protein_coding_gene
AT1G13560	protein_coding_gene
AT1G13570	protein_coding_gene
AT1G13630	protein_coding_gene
AT1G13640	protein_coding_gene
AT1G13650	protein_coding_gene
AT1G13670	protein_coding_gene
AT1G13700	protein_coding_gene
AT1G13730	protein_coding_gene
AT1G13740	protein_coding_gene
AT1G13750	protein_coding_gene
AT1G13780	protein_coding_gene
AT1G13790	protein_coding_gene
AT1G13800	protein_coding_gene
AT1G13810	protein_coding_gene
AT1G13820	protein_coding_gene
AT1G13830	protein_coding_gene
AT1G13860	protein_coding_gene
AT1G13870	protein_coding_gene
AT1G13900	protein_coding_gene
AT1G13910	protein_coding_gene
AT1G13920	protein_coding_gene
AT1G13930	protein_coding_gene
AT1G13940	protein_coding_gene
AT1G13950	protein_coding_gene
AT1G13960	protein_coding_gene
AT1G13970	protein_coding_gene
AT1G13980	protein_coding_gene
AT1G13990	protein_coding_gene
AT1G14000	protein_coding_gene
AT1G14010	protein_coding_gene
AT1G14020	protein_coding_gene
AT1G14030	protein_coding_gene
AT1G14040	protein_coding_gene
AT1G14060	protein_coding_gene
AT1G14070	protein_coding_gene
AT1G14080	protein_coding_gene
AT1G14100	protein_coding_gene
AT1G14130	protein_coding_gene
AT1G14140	protein_coding_gene
AT1G14150	protein_coding_gene
AT1G14170	protein_coding_gene
AT1G14180	protein_coding_gene
AT1G14185	protein_coding_gene
AT1G14190	protein_coding_gene
AT1G14200	protein_coding_gene
AT1G14205	protein_coding_gene
AT1G14210	protein_coding_gene
AT1G14230	protein_coding_gene
AT1G14250	protein_coding_gene
AT1G14260	protein_coding_gene
AT1G14270	protein_coding_gene
AT1G14280	protein_coding_gene
AT1G14290	protein_coding_gene
AT1G14300	protein_coding_gene
AT1G14320	protein_coding_gene
AT1G14330	protein_coding_gene
AT1G14340	protein_coding_gene
AT1G14345	protein_coding_gene
AT1G14350	protein_coding_gene
AT1G14360	protein_coding_gene
AT1G14370	protein_coding_gene
AT1G14380	protein_coding_gene
AT1G14390	protein_coding_gene
AT1G14400	protein_coding_gene
AT1G14410	protein_coding_gene
AT1G14430	protein_coding_gene
AT1G14440	protein_coding_gene
AT1G14450	protein_coding_gene
AT1G14460	protein_coding_gene
AT1G14470	protein_coding_gene
AT1G14480	protein_coding_gene
AT1G14510	protein_coding_gene
AT1G14520	protein_coding_gene
AT1G14530	protein_coding_gene
AT1G14540	protein_coding_gene
AT1G14560	protein_coding_gene
AT1G14570	protein_coding_gene
AT1G14580	protein_coding_gene
AT1G14590	protein_coding_gene
AT1G14600	protein_coding_gene
AT1G14610	protein_coding_gene
AT1G14620	protein_coding_gene
AT1G14640	protein_coding_gene
AT1G14650	protein_coding_gene
AT1G14660	protein_coding_gene
AT1G14670	protein_coding_gene
AT1G14680	protein_coding_gene
AT1G14685	protein_coding_gene
AT1G14687	protein_coding_gene
AT1G14690	protein_coding_gene
AT1G14700	protein_coding_gene
AT1G14710	protein_coding_gene
AT1G14720	protein_coding_gene
AT1G14730	protein_coding_gene
AT1G14740	protein_coding_gene
AT1G14750	protein_coding_gene
AT1G14770	protein_coding_gene
AT1G14780	protein_coding_gene
AT1G14790	protein_coding_gene
AT1G14810	protein_coding_gene
AT1G14820	protein_coding_gene
AT1G14830	protein_coding_gene
AT1G14840	protein_coding_gene
AT1G14850	protein_coding_gene
AT1G14860	protein_coding_gene
AT1G14870	protein_coding_gene
AT1G14880	protein_coding_gene
AT1G14890	protein_coding_gene
AT1G14900	protein_coding_gene
AT1G14910	protein_coding_gene
AT1G14920	protein_coding_gene
AT1G14970	protein_coding_gene
AT1G14980	protein_coding_gene
AT1G14990	protein_coding_gene
AT1G15000	protein_coding_gene
AT1G15002	other_RNA
AT1G15010	protein_coding_gene
AT1G15020	protein_coding_gene
AT1G15030	protein_coding_gene
AT1G15060	protein_coding_gene
AT1G15080	protein_coding_gene
AT1G15100	protein_coding_gene
AT1G15110	protein_coding_gene
AT1G15120	protein_coding_gene
AT1G15125	protein_coding_gene
AT1G15130	protein_coding_gene
AT1G15140	protein_coding_gene
AT1G15165	protein_coding_gene
AT1G15170	protein_coding_gene
AT1G15175	other_RNA
AT1G15180	protein_coding_gene
AT1G15200	protein_coding_gene
AT1G15220	protein_coding_gene
AT1G15230	protein_coding_gene
AT1G15240	protein_coding_gene
AT1G15250	protein_coding_gene
AT1G15260	protein_coding_gene
AT1G15280	protein_coding_gene
AT1G15290	protein_coding_gene
AT1G15300	transposable_element_gene
AT1G15310	protein_coding_gene
AT1G15330	protein_coding_gene
AT1G15340	protein_coding_gene
AT1G15350	protein_coding_gene
AT1G15370	protein_coding_gene
AT1G15380	protein_coding_gene
AT1G15390	protein_coding_gene
AT1G15400	protein_coding_gene
AT1G15410	protein_coding_gene
AT1G15415	protein_coding_gene
AT1G15420	protein_coding_gene
AT1G15430	protein_coding_gene
AT1G15440	protein_coding_gene
AT1G15470	protein_coding_gene
AT1G15480	protein_coding_gene
AT1G15490	protein_coding_gene
AT1G15500	protein_coding_gene
AT1G15510	protein_coding_gene
AT1G15520	protein_coding_gene
AT1G15530	protein_coding_gene
AT1G15540	protein_coding_gene
AT1G15550	protein_coding_gene
AT1G15570	protein_coding_gene
AT1G15580	protein_coding_gene
AT1G15660	protein_coding_gene
AT1G15670	protein_coding_gene
AT1G15690	protein_coding_gene
AT1G15710	protein_coding_gene
AT1G15730	protein_coding_gene
AT1G15740	protein_coding_gene
AT1G15750	protein_coding_gene
AT1G15760	protein_coding_gene
AT1G15780	protein_coding_gene
AT1G15790	protein_coding_gene
AT1G15800	protein_coding_gene
AT1G15810	protein_coding_gene
AT1G15820	protein_coding_gene
AT1G15830	protein_coding_gene
AT1G15860	protein_coding_gene
AT1G15870	protein_coding_gene
AT1G15880	protein_coding_gene
AT1G15885	protein_coding_gene
AT1G15890	protein_coding_gene
AT1G15900	protein_coding_gene
AT1G15910	protein_coding_gene
AT1G15920	protein_coding_gene
AT1G15930	protein_coding_gene
AT1G15940	protein_coding_gene
AT1G15950	protein_coding_gene
AT1G15960	protein_coding_gene
AT1G15970	protein_coding_gene
AT1G15980	protein_coding_gene
AT1G16000	protein_coding_gene
AT1G16010	protein_coding_gene
AT1G16020	protein_coding_gene
AT1G16022	protein_coding_gene
AT1G16030	protein_coding_gene
AT1G16040	protein_coding_gene
AT1G16060	protein_coding_gene
AT1G16080	protein_coding_gene
AT1G16090	protein_coding_gene
AT1G16110	protein_coding_gene
AT1G16130	protein_coding_gene
AT1G16150	protein_coding_gene
AT1G16160	protein_coding_gene
AT1G16170	protein_coding_gene
AT1G16180	protein_coding_gene
AT1G16190	protein_coding_gene
AT1G16210	protein_coding_gene
AT1G16220	protein_coding_gene
AT1G16240	protein_coding_gene
AT1G16250	protein_coding_gene
AT1G16260	protein_coding_gene
AT1G16270	protein_coding_gene
AT1G16280	protein_coding_gene
AT1G16300	protein_coding_gene
AT1G16310	protein_coding_gene
AT1G16320	protein_coding_gene
AT1G16340	protein_coding_gene
AT1G16350	protein_coding_gene
AT1G16370	protein_coding_gene
AT1G16390	protein_coding_gene
AT1G16400	protein_coding_gene
AT1G16410	protein_coding_gene
AT1G16420	protein_coding_gene
AT1G16445	protein_coding_gene
AT1G16460	protein_coding_gene
AT1G16470	protein_coding_gene
AT1G16489	other_RNA
AT1G16490	protein_coding_gene
AT1G16500	protein_coding_gene
AT1G16510	protein_coding_gene
AT1G16515	protein_coding_gene
AT1G16520	protein_coding_gene
AT1G16530	protein_coding_gene
AT1G16540	protein_coding_gene
AT1G16550	pseudogene
AT1G16560	protein_coding_gene
AT1G16570	protein_coding_gene
AT1G16590	protein_coding_gene
AT1G16630	protein_coding_gene
AT1G16635	other_RNA
AT1G16640	protein_coding_gene
AT1G16650	protein_coding_gene
AT1G16660	transposable_element_gene
AT1G16670	protein_coding_gene
AT1G16680	protein_coding_gene
AT1G16690	protein_coding_gene
AT1G16700	protein_coding_gene
AT1G16710	protein_coding_gene
AT1G16720	protein_coding_gene
AT1G16730	protein_coding_gene
AT1G16740	protein_coding_gene
AT1G16750	protein_coding_gene
AT1G16780	protein_coding_gene
AT1G16790	protein_coding_gene
AT1G16800	protein_coding_gene
AT1G16810	protein_coding_gene
AT1G16830	protein_coding_gene
AT1G16840	protein_coding_gene
AT1G16850	protein_coding_gene
AT1G16880	protein_coding_gene
AT1G16890	protein_coding_gene
AT1G16900	protein_coding_gene
AT1G16916	protein_coding_gene
AT1G16920	protein_coding_gene
AT1G16930	protein_coding_gene
AT1G16960	protein_coding_gene
AT1G16970	protein_coding_gene
AT1G17020	protein_coding_gene
AT1G17040	protein_coding_gene
AT1G17050	protein_coding_gene
AT1G17060	protein_coding_gene
AT1G17070	protein_coding_gene
AT1G17080	protein_coding_gene
AT1G17090	protein_coding_gene
AT1G17100	protein_coding_gene
AT1G17110	protein_coding_gene
AT1G17120	protein_coding_gene
AT1G17130	protein_coding_gene
AT1G17140	protein_coding_gene
AT1G17145	protein_coding_gene
AT1G17147	protein_coding_gene
AT1G17160	protein_coding_gene
AT1G17170	protein_coding_gene
AT1G17190	protein_coding_gene
AT1G17200	protein_coding_gene
AT1G17210	protein_coding_gene
AT1G17220	protein_coding_gene
AT1G17230	protein_coding_gene
AT1G17232	other_RNA
AT1G17240	protein_coding_gene
AT1G17250	protein_coding_gene
AT1G17255	other_RNA
AT1G17260	protein_coding_gene
AT1G17270	protein_coding_gene
AT1G17275	transposable_element_gene
AT1G17277	transposable_element_gene
AT1G17280	protein_coding_gene
AT1G17290	protein_coding_gene
AT1G17330	protein_coding_gene
AT1G17340	protein_coding_gene
AT1G17350	protein_coding_gene
AT1G17360	protein_coding_gene
AT1G17370	protein_coding_gene
AT1G17380	protein_coding_gene
AT1G17400	protein_coding_gene
AT1G17410	protein_coding_gene
AT1G17420	protein_coding_gene
AT1G17430	protein_coding_gene
AT1G17440	protein_coding_gene
AT1G17450	protein_coding_gene
AT1G17455	protein_coding_gene
AT1G17460	protein_coding_gene
AT1G17470	protein_coding_gene
AT1G17480	protein_coding_gene
AT1G17490	protein_coding_gene
AT1G17495	transposable_element_gene
AT1G17500	protein_coding_gene
AT1G17520	protein_coding_gene
AT1G17530	protein_coding_gene
AT1G17550	protein_coding_gene
AT1G17580	protein_coding_gene
AT1G17590	protein_coding_gene
AT1G17600	protein_coding_gene
AT1G17610	protein_coding_gene
AT1G17615	protein_coding_gene
AT1G17620	protein_coding_gene
AT1G17630	protein_coding_gene
AT1G17640	protein_coding_gene
AT1G17650	protein_coding_gene
AT1G17680	protein_coding_gene
AT1G17690	protein_coding_gene
AT1G17700	protein_coding_gene
AT1G17710	protein_coding_gene
AT1G17720	protein_coding_gene
AT1G17730	protein_coding_gene
AT1G17744	protein_coding_gene
AT1G17745	protein_coding_gene
AT1G17750	protein_coding_gene
AT1G17780	protein_coding_gene
AT1G17790	protein_coding_gene
AT1G17820	protein_coding_gene
AT1G17830	protein_coding_gene
AT1G17840	protein_coding_gene
AT1G17850	protein_coding_gene
AT1G17860	protein_coding_gene
AT1G17870	protein_coding_gene
AT1G17880	protein_coding_gene
AT1G17890	protein_coding_gene
AT1G17920	protein_coding_gene
AT1G17930	protein_coding_gene
AT1G17940	protein_coding_gene
AT1G17960	protein_coding_gene
AT1G17970	protein_coding_gene
AT1G17980	protein_coding_gene
AT1G17990	protein_coding_gene
AT1G18000	protein_coding_gene
AT1G18020	protein_coding_gene
AT1G18030	protein_coding_gene
AT1G18040	protein_coding_gene
AT1G18050	protein_coding_gene
AT1G18060	protein_coding_gene
AT1G18070	protein_coding_gene
AT1G18075	miRNA
AT1G18090	protein_coding_gene
AT1G18150	protein_coding_gene
AT1G18160	protein_coding_gene
AT1G18170	protein_coding_gene
AT1G18190	protein_coding_gene
AT1G18210	protein_coding_gene
AT1G18230	pseudogene
AT1G18240	transposable_element_gene
AT1G18250	protein_coding_gene
AT1G18260	protein_coding_gene
AT1G18265	protein_coding_gene
AT1G18270	protein_coding_gene
AT1G18300	protein_coding_gene
AT1G18320	protein_coding_gene
AT1G18330	protein_coding_gene
AT1G18340	protein_coding_gene
AT1G18350	protein_coding_gene
AT1G18360	protein_coding_gene
AT1G18370	protein_coding_gene
AT1G18382	other_RNA
AT1G18390	protein_coding_gene
AT1G18400	protein_coding_gene
AT1G18415	other_RNA
AT1G18440	protein_coding_gene
AT1G18450	protein_coding_gene
AT1G18460	protein_coding_gene
AT1G18470	protein_coding_gene
AT1G18480	protein_coding_gene
AT1G18485	protein_coding_gene
AT1G18490	protein_coding_gene
AT1G18500	protein_coding_gene
AT1G18540	protein_coding_gene
AT1G18550	protein_coding_gene
AT1G18560	protein_coding_gene
AT1G18570	protein_coding_gene
AT1G18580	protein_coding_gene
AT1G18590	protein_coding_gene
AT1G18600	protein_coding_gene
AT1G18610	protein_coding_gene
AT1G18620	protein_coding_gene
AT1G18630	protein_coding_gene
AT1G18640	protein_coding_gene
AT1G18650	protein_coding_gene
AT1G18660	protein_coding_gene
AT1G18670	protein_coding_gene
AT1G18690	protein_coding_gene
AT1G18700	protein_coding_gene
AT1G18710	protein_coding_gene
AT1G18720	protein_coding_gene
AT1G18730	protein_coding_gene
AT1G18735	other_RNA
AT1G18740	protein_coding_gene
AT1G18745	other_RNA
AT1G18750	protein_coding_gene
AT1G18773	protein_coding_gene
AT1G18800	protein_coding_gene
AT1G18810	protein_coding_gene
AT1G18830	protein_coding_gene
AT1G18835	protein_coding_gene
AT1G18840	protein_coding_gene
AT1G18850	protein_coding_gene
AT1G18860	protein_coding_gene
AT1G18870	protein_coding_gene
AT1G18880	protein_coding_gene
AT1G18890	protein_coding_gene
AT1G18900	protein_coding_gene
AT1G18910	protein_coding_gene
AT1G18940	protein_coding_gene
AT1G18990	protein_coding_gene
AT1G19000	protein_coding_gene
AT1G19010	protein_coding_gene
AT1G19020	protein_coding_gene
AT1G19050	protein_coding_gene
AT1G19080	protein_coding_gene
AT1G19090	protein_coding_gene
AT1G19100	protein_coding_gene
AT1G19110	protein_coding_gene
AT1G19120	protein_coding_gene
AT1G19130	protein_coding_gene
AT1G19140	protein_coding_gene
AT1G19150	protein_coding_gene
AT1G19170	protein_coding_gene
AT1G19180	protein_coding_gene
AT1G19190	protein_coding_gene
AT1G19200	protein_coding_gene
AT1G19210	protein_coding_gene
AT1G19220	protein_coding_gene
AT1G19230	protein_coding_gene
AT1G19240	protein_coding_gene
AT1G19250	protein_coding_gene
AT1G19270	protein_coding_gene
AT1G19290	protein_coding_gene
AT1G19300	protein_coding_gene
AT1G19310	protein_coding_gene
AT1G19320	protein_coding_gene
AT1G19330	protein_coding_gene
AT1G19340	protein_coding_gene
AT1G19350	protein_coding_gene
AT1G19360	protein_coding_gene
AT1G19370	protein_coding_gene
AT1G19371	miRNA
AT1G19373	snoRNA
AT1G19376	snoRNA
AT1G19380	protein_coding_gene
AT1G19394	protein_coding_gene
AT1G19396	protein_coding_gene
AT1G19397	protein_coding_gene
AT1G19400	protein_coding_gene
AT1G19420	pseudogene
AT1G19430	protein_coding_gene
AT1G19440	protein_coding_gene
AT1G19450	protein_coding_gene
AT1G19464	miRNA
AT1G19470	protein_coding_gene
AT1G19480	protein_coding_gene
AT1G19485	protein_coding_gene
AT1G19490	protein_coding_gene
AT1G19510	protein_coding_gene
AT1G19520	protein_coding_gene
AT1G19530	protein_coding_gene
AT1G19540	protein_coding_gene
AT1G19560	pseudogene
AT1G19570	protein_coding_gene
AT1G19580	protein_coding_gene
AT1G19600	protein_coding_gene
AT1G19620	protein_coding_gene
AT1G19630	protein_coding_gene
AT1G19640	protein_coding_gene
AT1G19650	protein_coding_gene
AT1G19660	protein_coding_gene
AT1G19670	protein_coding_gene
AT1G19680	protein_coding_gene
AT1G19690	protein_coding_gene
AT1G19700	protein_coding_gene
AT1G19710	protein_coding_gene
AT1G19715	protein_coding_gene
AT1G19720	protein_coding_gene
AT1G19730	protein_coding_gene
AT1G19750	protein_coding_gene
AT1G19770	protein_coding_gene
AT1G19800	protein_coding_gene
AT1G19835	protein_coding_gene
AT1G19840	protein_coding_gene
AT1G19850	protein_coding_gene
AT1G19860	protein_coding_gene
AT1G19870	protein_coding_gene
AT1G19880	protein_coding_gene
AT1G19910	protein_coding_gene
AT1G19920	protein_coding_gene
AT1G19940	protein_coding_gene
AT1G19950	protein_coding_gene
AT1G19960	protein_coding_gene
AT1G19968	other_RNA
AT1G19970	protein_coding_gene
AT1G19980	protein_coding_gene
AT1G19990	protein_coding_gene
AT1G20010	protein_coding_gene
AT1G20020	protein_coding_gene
AT1G20030	protein_coding_gene
AT1G20050	protein_coding_gene
AT1G20060	protein_coding_gene
AT1G20065	protein_coding_gene
AT1G20070	protein_coding_gene
AT1G20090	protein_coding_gene
AT1G20100	protein_coding_gene
AT1G20110	protein_coding_gene
AT1G20120	protein_coding_gene
AT1G20140	protein_coding_gene
AT1G20160	protein_coding_gene
AT1G20190	protein_coding_gene
AT1G20200	protein_coding_gene
AT1G20220	protein_coding_gene
AT1G20225	protein_coding_gene
AT1G20230	protein_coding_gene
AT1G20260	protein_coding_gene
AT1G20270	protein_coding_gene
AT1G20300	protein_coding_gene
AT1G20310	protein_coding_gene
AT1G20320	protein_coding_gene
AT1G20330	protein_coding_gene
AT1G20340	protein_coding_gene
AT1G20350	protein_coding_gene
AT1G20370	protein_coding_gene
AT1G20380	protein_coding_gene
AT1G20390	transposable_element_gene
AT1G20400	protein_coding_gene
AT1G20430	protein_coding_gene
AT1G20440	protein_coding_gene
AT1G20450	protein_coding_gene
AT1G20460	protein_coding_gene
AT1G20470	protein_coding_gene
AT1G20480	protein_coding_gene
AT1G20490	protein_coding_gene
AT1G20510	protein_coding_gene
AT1G20540	protein_coding_gene
AT1G20550	protein_coding_gene
AT1G20560	protein_coding_gene
AT1G20570	protein_coding_gene
AT1G20575	protein_coding_gene
AT1G20610	protein_coding_gene
AT1G20620	protein_coding_gene
AT1G20630	protein_coding_gene
AT1G20640	protein_coding_gene
AT1G20650	protein_coding_gene
AT1G20657	pseudogene
AT1G20670	protein_coding_gene
AT1G20691	other_RNA
AT1G20693	protein_coding_gene
AT1G20696	protein_coding_gene
AT1G20760	protein_coding_gene
AT1G20770	protein_coding_gene
AT1G20780	protein_coding_gene
AT1G20795	protein_coding_gene
AT1G20810	protein_coding_gene
AT1G20816	protein_coding_gene
AT1G20823	protein_coding_gene
AT1G20830	protein_coding_gene
AT1G20840	protein_coding_gene
AT1G20850	protein_coding_gene
AT1G20870	protein_coding_gene
AT1G20880	protein_coding_gene
AT1G20890	protein_coding_gene
AT1G20910	protein_coding_gene
AT1G20920	protein_coding_gene
AT1G20930	protein_coding_gene
AT1G20950	protein_coding_gene
AT1G20970	protein_coding_gene
AT1G20980	protein_coding_gene
AT1G21000	protein_coding_gene
AT1G21010	protein_coding_gene
AT1G21020	transposable_element_gene
AT1G21050	protein_coding_gene
AT1G21060	protein_coding_gene
AT1G21065	protein_coding_gene
AT1G21070	protein_coding_gene
AT1G21080	protein_coding_gene
AT1G21090	protein_coding_gene
AT1G21100	protein_coding_gene
AT1G21110	protein_coding_gene
AT1G21120	protein_coding_gene
AT1G21130	protein_coding_gene
AT1G21140	protein_coding_gene
AT1G21150	protein_coding_gene
AT1G21160	protein_coding_gene
AT1G21170	protein_coding_gene
AT1G21190	protein_coding_gene
AT1G21200	protein_coding_gene
AT1G21220	transposable_element_gene
AT1G21240	protein_coding_gene
AT1G21250	protein_coding_gene
AT1G21260	transposable_element_gene
AT1G21270	protein_coding_gene
AT1G21280	protein_coding_gene
AT1G21290	transposable_element_gene
AT1G21310	protein_coding_gene
AT1G21320	protein_coding_gene
AT1G21326	protein_coding_gene
AT1G21350	protein_coding_gene
AT1G21370	protein_coding_gene
AT1G21380	protein_coding_gene
AT1G21390	protein_coding_gene
AT1G21400	protein_coding_gene
AT1G21410	protein_coding_gene
AT1G21440	protein_coding_gene
AT1G21450	protein_coding_gene
AT1G21460	protein_coding_gene
AT1G21470	protein_coding_gene
AT1G21480	protein_coding_gene
AT1G21500	protein_coding_gene
AT1G21510	protein_coding_gene
AT1G21520	protein_coding_gene
AT1G21525	pseudogene
AT1G21540	protein_coding_gene
AT1G21550	protein_coding_gene
AT1G21560	protein_coding_gene
AT1G21580	protein_coding_gene
AT1G21590	protein_coding_gene
AT1G21600	protein_coding_gene
AT1G21610	protein_coding_gene
AT1G21630	protein_coding_gene
AT1G21640	protein_coding_gene
AT1G21650	protein_coding_gene
AT1G21651	protein_coding_gene
AT1G21660	protein_coding_gene
AT1G21670	protein_coding_gene
AT1G21680	protein_coding_gene
AT1G21690	protein_coding_gene
AT1G21700	protein_coding_gene
AT1G21710	protein_coding_gene
AT1G21720	protein_coding_gene
AT1G21730	protein_coding_gene
AT1G21740	protein_coding_gene
AT1G21750	protein_coding_gene
AT1G21760	protein_coding_gene
AT1G21770	protein_coding_gene
AT1G21780	protein_coding_gene
AT1G21790	protein_coding_gene
AT1G21810	protein_coding_gene
AT1G21830	protein_coding_gene
AT1G21840	protein_coding_gene
AT1G21880	protein_coding_gene
AT1G21900	protein_coding_gene
AT1G21910	protein_coding_gene
AT1G21920	protein_coding_gene
AT1G21930	protein_coding_gene
AT1G21980	protein_coding_gene
AT1G22020	protein_coding_gene
AT1G22030	protein_coding_gene
AT1G22040	protein_coding_gene
AT1G22050	protein_coding_gene
AT1G22060	protein_coding_gene
AT1G22070	protein_coding_gene
AT1G22130	protein_coding_gene
AT1G22140	protein_coding_gene
AT1G22160	protein_coding_gene
AT1G22170	protein_coding_gene
AT1G22180	protein_coding_gene
AT1G22190	protein_coding_gene
AT1G22200	protein_coding_gene
AT1G22230	protein_coding_gene
AT1G22250	protein_coding_gene
AT1G22260	protein_coding_gene
AT1G22270	protein_coding_gene
AT1G22275	protein_coding_gene
AT1G22280	protein_coding_gene
AT1G22300	protein_coding_gene
AT1G22310	protein_coding_gene
AT1G22330	protein_coding_gene
AT1G22350	pseudogene
AT1G22360	protein_coding_gene
AT1G22370	protein_coding_gene
AT1G22380	protein_coding_gene
AT1G22400	protein_coding_gene
AT1G22410	protein_coding_gene
AT1G22430	protein_coding_gene
AT1G22440	protein_coding_gene
AT1G22450	protein_coding_gene
AT1G22470	protein_coding_gene
AT1G22490	protein_coding_gene
AT1G22500	protein_coding_gene
AT1G22510	protein_coding_gene
AT1G22520	protein_coding_gene
AT1G22530	protein_coding_gene
AT1G22540	protein_coding_gene
AT1G22550	protein_coding_gene
AT1G22570	protein_coding_gene
AT1G22590	protein_coding_gene
AT1G22610	protein_coding_gene
AT1G22620	protein_coding_gene
AT1G22630	protein_coding_gene
AT1G22640	protein_coding_gene
AT1G22650	protein_coding_gene
AT1G22660	protein_coding_gene
AT1G22690	protein_coding_gene
AT1G22700	protein_coding_gene
AT1G22710	protein_coding_gene
AT1G22730	protein_coding_gene
AT1G22740	protein_coding_gene
AT1G22750	protein_coding_gene
AT1G22760	protein_coding_gene
AT1G22770	protein_coding_gene
AT1G22780	protein_coding_gene
AT1G22790	protein_coding_gene
AT1G22800	protein_coding_gene
AT1G22810	protein_coding_gene
AT1G22840	protein_coding_gene
AT1G22850	protein_coding_gene
AT1G22860	protein_coding_gene
AT1G22870	protein_coding_gene
AT1G22882	protein_coding_gene
AT1G22885	protein_coding_gene
AT1G22890	protein_coding_gene
AT1G22900	protein_coding_gene
AT1G22910	protein_coding_gene
AT1G22920	protein_coding_gene
AT1G22930	protein_coding_gene
AT1G22950	protein_coding_gene
AT1G22960	protein_coding_gene
AT1G22970	protein_coding_gene
AT1G22985	protein_coding_gene
AT1G22990	protein_coding_gene
AT1G23000	protein_coding_gene
AT1G23010	protein_coding_gene
AT1G23020	protein_coding_gene
AT1G23030	protein_coding_gene
AT1G23040	protein_coding_gene
AT1G23050	protein_coding_gene
AT1G23052	other_RNA
AT1G23060	protein_coding_gene
AT1G23080	protein_coding_gene
AT1G23090	protein_coding_gene
AT1G23100	protein_coding_gene
AT1G23110	protein_coding_gene
AT1G23120	protein_coding_gene
AT1G23130	protein_coding_gene
AT1G23140	protein_coding_gene
AT1G23170	protein_coding_gene
AT1G23180	protein_coding_gene
AT1G23190	protein_coding_gene
AT1G23200	protein_coding_gene
AT1G23205	protein_coding_gene
AT1G23220	protein_coding_gene
AT1G23230	protein_coding_gene
AT1G23260	protein_coding_gene
AT1G23280	protein_coding_gene
AT1G23290	protein_coding_gene
AT1G23310	protein_coding_gene
AT1G23330	protein_coding_gene
AT1G23360	protein_coding_gene
AT1G23390	protein_coding_gene
AT1G23400	protein_coding_gene
AT1G23410	protein_coding_gene
AT1G23440	protein_coding_gene
AT1G23460	protein_coding_gene
AT1G23470	pseudogene
AT1G23480	protein_coding_gene
AT1G23490	protein_coding_gene
AT1G23510	protein_coding_gene
AT1G23530	protein_coding_gene
AT1G23540	protein_coding_gene
AT1G23550	protein_coding_gene
AT1G23710	protein_coding_gene
AT1G23730	protein_coding_gene
AT1G23740	protein_coding_gene
AT1G23750	protein_coding_gene
AT1G23760	protein_coding_gene
AT1G23780	protein_coding_gene
AT1G23800	protein_coding_gene
AT1G23820	protein_coding_gene
AT1G23830	protein_coding_gene
AT1G23840	protein_coding_gene
AT1G23850	protein_coding_gene
AT1G23860	protein_coding_gene
AT1G23870	protein_coding_gene
AT1G23880	protein_coding_gene
AT1G23890	protein_coding_gene
AT1G23900	protein_coding_gene
AT1G23920	transposable_element_gene
AT1G23930	transposable_element_gene
AT1G23935	protein_coding_gene
AT1G23940	protein_coding_gene
AT1G23950	protein_coding_gene
AT1G23960	protein_coding_gene
AT1G23970	protein_coding_gene
AT1G23980	protein_coding_gene
AT1G24030	protein_coding_gene
AT1G24040	protein_coding_gene
AT1G24050	protein_coding_gene
AT1G24070	protein_coding_gene
AT1G24090	protein_coding_gene
AT1G24095	protein_coding_gene
AT1G24100	protein_coding_gene
AT1G24120	protein_coding_gene
AT1G24140	protein_coding_gene
AT1G24145	protein_coding_gene
AT1G24147	protein_coding_gene
AT1G24148	protein_coding_gene
AT1G24150	protein_coding_gene
AT1G24160	protein_coding_gene
AT1G24170	protein_coding_gene
AT1G24180	protein_coding_gene
AT1G24190	protein_coding_gene
AT1G24210	protein_coding_gene
AT1G24240	protein_coding_gene
AT1G24260	protein_coding_gene
AT1G24265	protein_coding_gene
AT1G24267	protein_coding_gene
AT1G24280	protein_coding_gene
AT1G24300	protein_coding_gene
AT1G24310	protein_coding_gene
AT1G24330	protein_coding_gene
AT1G24340	protein_coding_gene
AT1G24350	protein_coding_gene
AT1G24360	protein_coding_gene
AT1G24400	protein_coding_gene
AT1G24440	protein_coding_gene
AT1G24450	protein_coding_gene
AT1G24460	protein_coding_gene
AT1G24470	protein_coding_gene
AT1G24490	protein_coding_gene
AT1G24510	protein_coding_gene
AT1G24530	protein_coding_gene
AT1G24560	protein_coding_gene
AT1G24575	protein_coding_gene
AT1G24580	protein_coding_gene
AT1G24610	protein_coding_gene
AT1G24625	protein_coding_gene
AT1G24650	protein_coding_gene
AT1G24706	protein_coding_gene
AT1G24735	protein_coding_gene
AT1G24764	protein_coding_gene
AT1G24807	protein_coding_gene
AT1G24938	transposable_element_gene
AT1G25054	protein_coding_gene
AT1G25083	protein_coding_gene
AT1G25209	pseudogene
AT1G25211	protein_coding_gene
AT1G25220	protein_coding_gene
AT1G25230	protein_coding_gene
AT1G25250	protein_coding_gene
AT1G25260	protein_coding_gene
AT1G25275	protein_coding_gene
AT1G25280	protein_coding_gene
AT1G25290	protein_coding_gene
AT1G25320	protein_coding_gene
AT1G25350	protein_coding_gene
AT1G25360	protein_coding_gene
AT1G25370	protein_coding_gene
AT1G25375	protein_coding_gene
AT1G25380	protein_coding_gene
AT1G25390	protein_coding_gene
AT1G25400	protein_coding_gene
AT1G25420	protein_coding_gene
AT1G25425	protein_coding_gene
AT1G25430	transposable_element_gene
AT1G25440	protein_coding_gene
AT1G25450	protein_coding_gene
AT1G25460	protein_coding_gene
AT1G25480	protein_coding_gene
AT1G25490	protein_coding_gene
AT1G25500	protein_coding_gene
AT1G25510	protein_coding_gene
AT1G25520	protein_coding_gene
AT1G25530	protein_coding_gene
AT1G25540	protein_coding_gene
AT1G25550	protein_coding_gene
AT1G25560	protein_coding_gene
AT1G25570	protein_coding_gene
AT1G25580	protein_coding_gene
AT1G25682	protein_coding_gene
AT1G25886	transposable_element_gene
AT1G26090	protein_coding_gene
AT1G26100	protein_coding_gene
AT1G26110	protein_coding_gene
AT1G26120	protein_coding_gene
AT1G26130	protein_coding_gene
AT1G26150	protein_coding_gene
AT1G26160	protein_coding_gene
AT1G26170	protein_coding_gene
AT1G26180	protein_coding_gene
AT1G26190	protein_coding_gene
AT1G26200	protein_coding_gene
AT1G26208	other_RNA
AT1G26210	protein_coding_gene
AT1G26218	other_RNA
AT1G26220	protein_coding_gene
AT1G26230	protein_coding_gene
AT1G26260	protein_coding_gene
AT1G26270	protein_coding_gene
AT1G26300	protein_coding_gene
AT1G26330	protein_coding_gene
AT1G26340	protein_coding_gene
AT1G26370	protein_coding_gene
AT1G26380	protein_coding_gene
AT1G26390	protein_coding_gene
AT1G26400	protein_coding_gene
AT1G26410	protein_coding_gene
AT1G26420	protein_coding_gene
AT1G26440	protein_coding_gene
AT1G26460	protein_coding_gene
AT1G26470	protein_coding_gene
AT1G26500	protein_coding_gene
AT1G26520	protein_coding_gene
AT1G26540	protein_coding_gene
AT1G26550	protein_coding_gene
AT1G26558	other_RNA
AT1G26560	protein_coding_gene
AT1G26570	protein_coding_gene
AT1G26580	protein_coding_gene
AT1G26600	protein_coding_gene
AT1G26610	protein_coding_gene
AT1G26620	protein_coding_gene
AT1G26630	protein_coding_gene
AT1G26640	protein_coding_gene
AT1G26650	protein_coding_gene
AT1G26665	protein_coding_gene
AT1G26670	protein_coding_gene
AT1G26690	protein_coding_gene
AT1G26730	protein_coding_gene
AT1G26740	protein_coding_gene
AT1G26750	protein_coding_gene
AT1G26761	protein_coding_gene
AT1G26770	protein_coding_gene
AT1G26790	protein_coding_gene
AT1G26800	protein_coding_gene
AT1G26810	protein_coding_gene
AT1G26820	protein_coding_gene
AT1G26830	protein_coding_gene
AT1G26840	protein_coding_gene
AT1G26850	protein_coding_gene
AT1G26880	protein_coding_gene
AT1G26900	protein_coding_gene
AT1G26910	protein_coding_gene
AT1G26920	protein_coding_gene
AT1G26930	protein_coding_gene
AT1G26940	protein_coding_gene
AT1G26960	protein_coding_gene
AT1G26976	protein_coding_gene
AT1G26990	transposable_element_gene
AT1G27000	protein_coding_gene
AT1G27020	protein_coding_gene
AT1G27030	protein_coding_gene
AT1G27050	protein_coding_gene
AT1G27060	protein_coding_gene
AT1G27090	protein_coding_gene
AT1G27100	protein_coding_gene
AT1G27110	protein_coding_gene
AT1G27120	protein_coding_gene
AT1G27130	protein_coding_gene
AT1G27150	protein_coding_gene
AT1G27170	protein_coding_gene
AT1G27180	protein_coding_gene
AT1G27190	protein_coding_gene
[truncated: 18,570 more rows]

## Sheet: S4
Genes showing statistically significant induction by Hpa in the Wt and/or Hpa-resistant epiRILs
602 (WT)		148		193		454		508
48hpi	72hpi	48hpi	72hpi	48hpi	72hpi	48hpi	72hpi	48hpi	72hpi		Total (48 and 72hpi)
AT1G01170	AT1G01140	AT1G01170	AT1G01040	AT1G01180	AT1G01040	AT1G01170	AT1G01040	AT1G01070	AT1G01040		AT1G01040
AT1G01190	AT1G01160	AT1G01180	AT1G01160	AT1G01230	AT1G01160	AT1G01180	AT1G01140	AT1G01180	AT1G01070		AT1G01070
AT1G01220	AT1G01180	AT1G01220	AT1G01180	AT1G01240	AT1G01180	AT1G01230	AT1G01180	AT1G01230	AT1G01180		AT1G01140
AT1G01230	AT1G01220	AT1G01230	AT1G01190	AT1G01340	AT1G01230	AT1G01240	AT1G01230	AT1G01240	AT1G01230		AT1G01160
AT1G01240	AT1G01230	AT1G01240	AT1G01220	AT1G01440	AT1G01240	AT1G01260	AT1G01240	AT1G01260	AT1G01240		AT1G01170
AT1G01340	AT1G01240	AT1G01340	AT1G01240	AT1G01550	AT1G01340	AT1G01340	AT1G01340	AT1G01340	AT1G01340		AT1G01180
AT1G01480	AT1G01340	AT1G01440	AT1G01340	AT1G01560	AT1G01350	AT1G01448	AT1G01350	AT1G01440	AT1G01350		AT1G01190
AT1G01560	AT1G01440	AT1G01448	AT1G01440	AT1G01680	AT1G01440	AT1G01490	AT1G01440	AT1G01550	AT1G01440		AT1G01220
AT1G01680	AT1G01480	AT1G01560	AT1G01480	AT1G01730	AT1G01480	AT1G01500	AT1G01480	AT1G01560	AT1G01480		AT1G01230
AT1G01730	AT1G01490	AT1G01680	AT1G01490	AT1G01770	AT1G01560	AT1G01550	AT1G01560	AT1G01680	AT1G01560		AT1G01240
AT1G01770	AT1G01560	AT1G01770	AT1G01510	AT1G01800	AT1G01650	AT1G01560	AT1G01650	AT1G01730	AT1G01650		AT1G01260
AT1G01960	AT1G01670	AT1G01820	AT1G01560	AT1G01820	AT1G01680	AT1G01680	AT1G01670	AT1G01770	AT1G01680		AT1G01340
AT1G02130	AT1G01680	AT1G01920	AT1G01650	AT1G01940	AT1G01730	AT1G01730	AT1G01680	AT1G01820	AT1G01730		AT1G01350
AT1G02170	AT1G01690	AT1G01960	AT1G01670	AT1G01960	AT1G01770	AT1G01770	AT1G01730	AT1G01830	AT1G01820		AT1G01440
AT1G02220	AT1G01730	AT1G02170	AT1G01680	AT1G02120	AT1G01800	AT1G01800	AT1G01770	AT1G01940	AT1G01830		AT1G01448
AT1G02230	AT1G01770	AT1G02230	AT1G01730	AT1G02170	AT1G01820	AT1G01820	AT1G01800	AT1G01960	AT1G01910		AT1G01480
AT1G02260	AT1G01800	AT1G02260	AT1G01770	AT1G02230	AT1G01830	AT1G01830	AT1G01820	AT1G02080	AT1G01940		AT1G01490
AT1G02270	AT1G01820	AT1G02300	AT1G01800	AT1G02260	AT1G01910	AT1G01910	AT1G01830	AT1G02100	AT1G01960		AT1G01500
AT1G02300	AT1G01910	AT1G02360	AT1G01820	AT1G02300	AT1G01940	AT1G01960	AT1G01920	AT1G02120	AT1G02100		AT1G01510
AT1G02360	AT1G01940	AT1G02430	AT1G01910	AT1G02360	AT1G01960	AT1G02080	AT1G01940	AT1G02170	AT1G02120		AT1G01550
AT1G02370	AT1G01960	AT1G02440	AT1G01940	AT1G02400	AT1G02080	AT1G02120	AT1G01960	AT1G02230	AT1G02130		AT1G01560
AT1G02400	AT1G02080	AT1G02450	AT1G01960	AT1G02410	AT1G02100	AT1G02170	AT1G02120	AT1G02260	AT1G02170		AT1G01650
AT1G02430	AT1G02120	AT1G02520	AT1G02080	AT1G02430	AT1G02120	AT1G02230	AT1G02140	AT1G02300	AT1G02220		AT1G01670
AT1G02440	AT1G02170	AT1G02560	AT1G02120	AT1G02440	AT1G02140	AT1G02260	AT1G02170	AT1G02360	AT1G02230		AT1G01680
AT1G02450	AT1G02220	AT1G02610	AT1G02170	AT1G02450	AT1G02170	AT1G02300	AT1G02230	AT1G02410	AT1G02260		AT1G01690
AT1G02560	AT1G02230	AT1G02620	AT1G02220	AT1G02560	AT1G02220	AT1G02305	AT1G02260	AT1G02430	AT1G02300		AT1G01730
AT1G02610	AT1G02260	AT1G02660	AT1G02230	AT1G02610	AT1G02230	AT1G02360	AT1G02300	AT1G02440	AT1G02305		AT1G01770
AT1G02660	AT1G02270	AT1G02920	AT1G02260	AT1G02620	AT1G02260	AT1G02400	AT1G02305	AT1G02450	AT1G02360		AT1G01800
AT1G02780	AT1G02300	AT1G02930	AT1G02300	AT1G02660	AT1G02300	AT1G02410	AT1G02360	AT1G02560	AT1G02370		AT1G01820
AT1G02850	AT1G02305	AT1G03000	AT1G02305	AT1G02850	AT1G02305	AT1G02440	AT1G02370	AT1G02610	AT1G02400		AT1G01830
AT1G02920	AT1G02360	AT1G03030	AT1G02330	AT1G02920	AT1G02330	AT1G02450	AT1G02400	AT1G02660	AT1G02410		AT1G01910
AT1G02930	AT1G02370	AT1G03130	AT1G02360	AT1G02930	AT1G02360	AT1G02470	AT1G02410	AT1G02850	AT1G02430		AT1G01920
AT1G02940	AT1G02400	AT1G03140	AT1G02430	AT1G02940	AT1G02370	AT1G02475	AT1G02440	AT1G02920	AT1G02440		AT1G01940
AT1G03030	AT1G02410	AT1G03210	AT1G02440	AT1G03030	AT1G02400	AT1G02560	AT1G02450	AT1G02930	AT1G02450		AT1G01960
AT1G03130	AT1G02430	AT1G03230	AT1G02450	AT1G03140	AT1G02410	AT1G02610	AT1G02470	AT1G02940	AT1G02470		AT1G02080
AT1G03140	AT1G02440	AT1G03290	AT1G02460	AT1G03210	AT1G02430	AT1G02620	AT1G02500	AT1G03060	AT1G02500		AT1G02100
AT1G03210	AT1G02450	AT1G03330	AT1G02470	AT1G03220	AT1G02450	AT1G02660	AT1G02560	AT1G03140	AT1G02520		AT1G02120
AT1G03220	AT1G02470	AT1G03340	AT1G02500	AT1G03230	AT1G02460	AT1G02670	AT1G02580	AT1G03210	AT1G02580		AT1G02130
AT1G03230	AT1G02500	AT1G03370	AT1G02520	AT1G03290	AT1G02470	AT1G02850	AT1G02610	AT1G03230	AT1G02610		AT1G02140
AT1G03290	AT1G02520	AT1G03400	AT1G02580	AT1G03340	AT1G02500	AT1G02880	AT1G02620	AT1G03290	AT1G02660		AT1G02170
AT1G03310	AT1G02580	AT1G03430	AT1G02610	AT1G03370	AT1G02520	AT1G02900	AT1G02660	AT1G03370	AT1G02740		AT1G02220
AT1G03330	AT1G02610	AT1G03475	AT1G02620	AT1G03400	AT1G02560	AT1G02920	AT1G02850	AT1G03400	AT1G02850		AT1G02230
AT1G03370	AT1G02740	AT1G03580	AT1G02660	AT1G03430	AT1G02580	AT1G02930	AT1G02880	AT1G03430	AT1G02880		AT1G02260
AT1G03400	AT1G02780	AT1G03590	AT1G02850	AT1G03475	AT1G02610	AT1G02940	AT1G02920	AT1G03475	AT1G02920		AT1G02270
AT1G03430	AT1G02850	AT1G03610	AT1G02920	AT1G03580	AT1G02660	AT1G03030	AT1G02930	AT1G03580	AT1G02930		AT1G02300
AT1G03475	AT1G02880	AT1G03620	AT1G02930	AT1G03590	AT1G02740	AT1G03060	AT1G02960	AT1G03650	AT1G03030		AT1G02305
AT1G03590	AT1G02920	AT1G03660	AT1G02940	AT1G03610	AT1G02850	AT1G03090	AT1G02990	AT1G03660	AT1G03060		AT1G02330
AT1G03680	AT1G02930	AT1G03730	AT1G02990	AT1G03660	AT1G02920	AT1G03140	AT1G03030	AT1G03730	AT1G03080		AT1G02360
AT1G03740	AT1G02940	AT1G03740	AT1G03030	AT1G03730	AT1G02930	AT1G03210	AT1G03060	AT1G03740	AT1G03190		AT1G02370
AT1G03750	AT1G02990	AT1G03760	AT1G03060	AT1G03740	AT1G02990	AT1G03230	AT1G03080	AT1G03750	AT1G03210		AT1G02400
AT1G03820	AT1G03000	AT1G03850	AT1G03080	AT1G03750	AT1G03030	AT1G03290	AT1G03140	AT1G03760	AT1G03230		AT1G02410
AT1G03850	AT1G03030	AT1G03860	AT1G03140	AT1G03760	AT1G03060	AT1G03370	AT1G03210	AT1G03850	AT1G03290		AT1G02430
AT1G03860	AT1G03060	AT1G03900	AT1G03210	AT1G03820	AT1G03080	AT1G03400	AT1G03230	AT1G03860	AT1G03310		AT1G02440
AT1G03970	AT1G03080	AT1G03980	AT1G03220	AT1G03850	AT1G03090	AT1G03430	AT1G03290	AT1G03900	AT1G03340		AT1G02450
AT1G04280	AT1G03140	AT1G04260	AT1G03230	AT1G03860	AT1G03140	AT1G03475	AT1G03340	AT1G03950	AT1G03350		AT1G02460
AT1G04310	AT1G03210	AT1G04280	AT1G03290	AT1G03900	AT1G03180	AT1G03580	AT1G03350	AT1G04100	AT1G03370		AT1G02470
AT1G04400	AT1G03220	AT1G04310	AT1G03310	AT1G04200	AT1G03210	AT1G03650	AT1G03370	AT1G04140	AT1G03380		AT1G02475
AT1G04410	AT1G03230	AT1G04400	AT1G03370	AT1G04260	AT1G03220	AT1G03730	AT1G03380	AT1G04200	AT1G03400		AT1G02500
AT1G04440	AT1G03290	AT1G04410	AT1G03380	AT1G04280	AT1G03230	AT1G03740	AT1G03400	AT1G04260	AT1G03430		AT1G02520
AT1G04555	AT1G03310	AT1G04440	AT1G03400	AT1G04310	AT1G03280	AT1G03750	AT1G03430	AT1G04280	AT1G03475		AT1G02560
AT1G04690	AT1G03370	AT1G04555	AT1G03430	AT1G04400	AT1G03290	AT1G03900	AT1G03475	AT1G04400	AT1G03510		AT1G02580
AT1G04750	AT1G03380	AT1G04690	AT1G03475	AT1G04410	AT1G03340	AT1G03950	AT1G03580	AT1G04410	AT1G03580		AT1G02610
AT1G04810	AT1G03400	AT1G04750	AT1G03580	AT1G04440	AT1G03370	AT1G03970	AT1G03590	AT1G04440	AT1G03650		AT1G02620
AT1G04820	AT1G03430	AT1G04810	AT1G03590	AT1G04555	AT1G03380	AT1G04030	AT1G03620	AT1G04555	AT1G03660		AT1G02660
AT1G04900	AT1G03590	AT1G04900	AT1G03610	AT1G04690	AT1G03400	AT1G04260	AT1G03660	AT1G04600	AT1G03740		AT1G02670
AT1G04970	AT1G03660	AT1G04980	AT1G03650	AT1G04750	AT1G03430	AT1G04280	AT1G03730	AT1G04690	AT1G03750		AT1G02740
AT1G04980	AT1G03740	AT1G05010	AT1G03660	AT1G04780	AT1G03475	AT1G04400	AT1G03740	AT1G04750	AT1G03760		AT1G02780
AT1G05060	AT1G03750	AT1G05060	AT1G03740	AT1G04810	AT1G03495	AT1G04410	AT1G03750	AT1G04780	AT1G03820		AT1G02850
AT1G05180	AT1G03760	AT1G05180	AT1G03750	AT1G04900	AT1G03590	AT1G04440	AT1G03760	AT1G04810	AT1G03850		AT1G02880
AT1G05210	AT1G03770	AT1G05205	AT1G03760	AT1G04960	AT1G03650	AT1G04555	AT1G03770	AT1G04900	AT1G03860		AT1G02900
AT1G05220	AT1G03850	AT1G05210	AT1G03770	AT1G04970	AT1G03660	AT1G04690	AT1G03850	AT1G04970	AT1G03900		AT1G02920
AT1G05300	AT1G03860	AT1G05220	AT1G03850	AT1G04980	AT1G03730	AT1G04750	AT1G03860	AT1G04980	AT1G03905		AT1G02930
AT1G05310	AT1G03900	AT1G05300	AT1G03860	AT1G05010	AT1G03740	AT1G04780	AT1G03900	AT1G05010	AT1G03950		AT1G02940
AT1G05340	AT1G03950	AT1G05340	AT1G03900	AT1G05120	AT1G03750	AT1G04810	AT1G03950	AT1G05020	AT1G03970		AT1G02960
AT1G05350	AT1G03970	AT1G05350	AT1G03970	AT1G05180	AT1G03760	AT1G04900	AT1G03970	AT1G05120	AT1G04120		AT1G02990
AT1G05500	AT1G04010	AT1G05570	AT1G04010	AT1G05210	AT1G03850	AT1G04970	AT1G04140	AT1G05135	AT1G04190		AT1G03000
AT1G05570	AT1G04120	AT1G05575	AT1G04120	AT1G05220	AT1G03860	AT1G04980	AT1G04190	AT1G05170	AT1G04200		AT1G03030
AT1G05575	AT1G04200	AT1G05620	AT1G04140	AT1G05300	AT1G03900	AT1G05010	AT1G04200	AT1G05180	AT1G04230		AT1G03060
AT1G05620	AT1G04230	AT1G05630	AT1G04200	AT1G05340	AT1G03950	AT1G05030	AT1G04230	AT1G05205	AT1G04260		AT1G03080
AT1G05630	AT1G04280	AT1G05675	AT1G04230	AT1G05350	AT1G03970	AT1G05060	AT1G04260	AT1G05210	AT1G04280		AT1G03090
AT1G05675	AT1G04310	AT1G05720	AT1G04260	AT1G05430	AT1G04120	AT1G05180	AT1G04280	AT1G05220	AT1G04400		AT1G03130
AT1G05700	AT1G04400	AT1G05780	AT1G04280	AT1G05520	AT1G04140	AT1G05210	AT1G04400	AT1G05300	AT1G04410		AT1G03140
AT1G05720	AT1G04410	AT1G05790	AT1G04310	AT1G05570	AT1G04200	AT1G05300	AT1G04410	AT1G05320	AT1G04440		AT1G03180
AT1G05790	AT1G04440	AT1G05805	AT1G04400	AT1G05575	AT1G04230	AT1G05310	AT1G04440	AT1G05340	AT1G04490		AT1G03190
AT1G05805	AT1G04490	AT1G05880	AT1G04410	AT1G05630	AT1G04280	AT1G05320	AT1G04530	AT1G05350	AT1G04555		AT1G03210
AT1G05880	AT1G04555	AT1G05940	AT1G04440	AT1G05675	AT1G04400	AT1G05340	AT1G04555	AT1G05520	AT1G04600		AT1G03220
AT1G05950	AT1G04600	AT1G06050	AT1G04555	AT1G05700	AT1G04410	AT1G05520	AT1G04600	AT1G05570	AT1G04690		AT1G03230
AT1G06110	AT1G04690	AT1G06060	AT1G04600	AT1G05720	AT1G04440	AT1G05570	AT1G04690	AT1G05575	AT1G04750		AT1G03280
AT1G06130	AT1G04750	AT1G06110	AT1G04690	AT1G05790	AT1G04490	AT1G05575	AT1G04750	AT1G05630	AT1G04780		AT1G03290
AT1G06160	AT1G04780	AT1G06130	AT1G04750	AT1G05805	AT1G04555	AT1G05630	AT1G04780	AT1G05675	AT1G04790		AT1G03310
AT1G06290	AT1G04810	AT1G06160	AT1G04780	AT1G05840	AT1G04600	AT1G05675	AT1G04810	AT1G05720	AT1G04810		AT1G03330
AT1G06460	AT1G04850	AT1G06290	AT1G04810	AT1G05940	AT1G04690	AT1G05720	AT1G04850	AT1G05730	AT1G04850		AT1G03340
AT1G06620	AT1G04910	AT1G06510	AT1G04850	AT1G05950	AT1G04750	AT1G05790	AT1G04910	AT1G05750	AT1G04910		AT1G03350
AT1G06645	AT1G04960	AT1G06630	AT1G04910	AT1G06110	AT1G04780	AT1G05805	AT1G04960	AT1G05790	AT1G04960		AT1G03370
AT1G07000	AT1G04970	AT1G06840	AT1G04960	AT1G06130	AT1G04810	AT1G05840	AT1G04970	AT1G05805	AT1G04970		AT1G03380
AT1G07020	AT1G04980	AT1G06870	AT1G04970	AT1G06160	AT1G04850	AT1G05880	AT1G04980	AT1G05840	AT1G04980		AT1G03400
AT1G07040	AT1G05000	AT1G07000	AT1G04980	AT1G06290	AT1G04910	AT1G05940	AT1G05000	AT1G05880	AT1G04990		AT1G03430
AT1G07090	AT1G05010	AT1G07020	AT1G04990	AT1G06510	AT1G04960	AT1G05950	AT1G05010	AT1G05890	AT1G05010		AT1G03475
AT1G07160	AT1G05060	AT1G07128	AT1G05000	AT1G06620	AT1G04970	AT1G05970	AT1G05020	AT1G05940	AT1G05060		AT1G03495
AT1G07210	AT1G05120	AT1G07160	AT1G05010	AT1G06630	AT1G04980	AT1G06130	AT1G05060	AT1G05950	AT1G05120		AT1G03510
AT1G07220	AT1G05180	AT1G07170	AT1G05060	AT1G06650	AT1G05000	AT1G06160	AT1G05120	AT1G06110	AT1G05170		AT1G03580
AT1G07230	AT1G05270	AT1G07210	AT1G05120	AT1G06760	AT1G05010	AT1G06290	AT1G05170	AT1G06130	AT1G05180		AT1G03590
AT1G07240	AT1G05300	AT1G07220	AT1G05180	AT1G06840	AT1G05020	AT1G06440	AT1G05180	AT1G06160	AT1G05205		AT1G03610
AT1G07520	AT1G05340	AT1G07230	AT1G05205	AT1G07000	AT1G05060	AT1G06460	AT1G05220	AT1G06290	AT1G05270		AT1G03620
AT1G07610	AT1G05350	AT1G07240	AT1G05210	AT1G07020	AT1G05120	AT1G06630	AT1G05300	AT1G06510	AT1G05300		AT1G03650
AT1G07620	AT1G05500	AT1G07310	AT1G05220	AT1G07040	AT1G05180	AT1G06645	AT1G05320	AT1G06760	AT1G05320		AT1G03660
AT1G07630	AT1G05520	AT1G07520	AT1G05300	AT1G07090	AT1G05220	AT1G06760	AT1G05340	AT1G06780	AT1G05340		AT1G03680
AT1G07670	AT1G05560	AT1G07630	AT1G05340	AT1G07128	AT1G05270	AT1G06780	AT1G05350	AT1G06840	AT1G05350		AT1G03730
AT1G07705	AT1G05570	AT1G07920	AT1G05350	AT1G07160	AT1G05300	AT1G06840	AT1G05430	AT1G07000	AT1G05520		AT1G03740
AT1G07750	AT1G05575	AT1G07940	AT1G05520	AT1G07170	AT1G05340	AT1G07000	AT1G05520	AT1G07020	AT1G05570		AT1G03750
AT1G07890	AT1G05630	AT1G08050	AT1G05570	AT1G07220	AT1G05350	AT1G07020	AT1G05570	AT1G07040	AT1G05575		AT1G03760
AT1G07900	AT1G05640	AT1G08315	AT1G05575	AT1G07230	AT1G05460	AT1G07040	AT1G05575	AT1G07090	AT1G05620		AT1G03770
AT1G07920	AT1G05675	AT1G08350	AT1G05630	AT1G07240	AT1G05500	AT1G07090	AT1G05630	AT1G07128	AT1G05630		AT1G03820
AT1G07940	AT1G05680	AT1G08380	AT1G05675	AT1G07260	AT1G05520	AT1G07128	AT1G05675	AT1G07135	AT1G05675		AT1G03850
AT1G08040	AT1G05700	AT1G08450	AT1G05680	AT1G07310	AT1G05570	AT1G07135	AT1G05720	AT1G07140	AT1G05680		AT1G03860
AT1G08050	AT1G05710	AT1G08460	AT1G05710	AT1G07520	AT1G05575	AT1G07140	AT1G05780	AT1G07160	AT1G05710		AT1G03900
AT1G08090	AT1G05720	AT1G08480	AT1G05720	AT1G07620	AT1G05630	AT1G07160	AT1G05790	AT1G07170	AT1G05720		AT1G03905
AT1G08380	AT1G05790	AT1G08530	AT1G05750	AT1G07630	AT1G05640	AT1G07170	AT1G05805	AT1G07210	AT1G05780		AT1G03950
AT1G08450	AT1G05805	AT1G08630	AT1G05790	AT1G07670	AT1G05675	AT1G07230	AT1G05840	AT1G07220	AT1G05790		AT1G03970
AT1G08460	AT1G05840	AT1G08660	AT1G05805	AT1G07728	AT1G05680	AT1G07240	AT1G05880	AT1G07230	AT1G05805		AT1G03980
AT1G08480	AT1G05880	AT1G08700	AT1G05840	AT1G07820	AT1G05710	AT1G07280	AT1G05890	AT1G07240	AT1G05840		AT1G04010
AT1G08530	AT1G05890	AT1G08720	AT1G05880	AT1G07920	AT1G05720	AT1G07310	AT1G05910	AT1G07280	AT1G05880		AT1G04030
AT1G08660	AT1G05910	AT1G08820	AT1G05890	AT1G07940	AT1G05730	AT1G07380	AT1G05950	AT1G07380	AT1G05890		AT1G04100
AT1G08720	AT1G05950	AT1G08830	AT1G05910	AT1G07990	AT1G05790	AT1G07390	AT1G06002	AT1G07520	AT1G05910		AT1G04120
AT1G08820	AT1G06002	AT1G08890	AT1G06110	AT1G08050	AT1G05805	AT1G07520	AT1G06050	AT1G07620	AT1G05950		AT1G04140
AT1G08830	AT1G06060	AT1G08900	AT1G06130	AT1G08315	AT1G05840	AT1G07620	AT1G06060	AT1G07630	AT1G06002		AT1G04190
AT1G08900	AT1G06110	AT1G08930	AT1G06160	AT1G08350	AT1G05880	AT1G07630	AT1G06130	AT1G07650	AT1G06110		AT1G04200
AT1G08930	AT1G06130	AT1G08980	AT1G06180	AT1G08380	AT1G05890	AT1G07650	AT1G06150	AT1G07670	AT1G06130		AT1G04230
AT1G08940	AT1G06160	AT1G09010	AT1G06290	AT1G08450	AT1G05950	AT1G07728	AT1G06160	AT1G07705	AT1G06160		AT1G04260
AT1G09050	AT1G06210	AT1G09040	AT1G06620	AT1G08460	AT1G06002	AT1G07750	AT1G06180	AT1G07810	AT1G06180		AT1G04280
AT1G09080	AT1G06290	AT1G09050	AT1G06650	AT1G08480	AT1G06080	AT1G07810	AT1G06290	AT1G07900	AT1G06210		AT1G04310
AT1G09100	AT1G06400	AT1G09080	AT1G06780	AT1G08630	AT1G06110	AT1G07820	AT1G06500	AT1G07920	AT1G06290		AT1G04400
AT1G09200	AT1G06510	AT1G09100	AT1G06840	AT1G08660	AT1G06130	AT1G07900	AT1G06510	AT1G07930	AT1G06590		AT1G04410
AT1G09210	AT1G06620	AT1G09195	AT1G06870	AT1G08700	AT1G06160	AT1G07920	AT1G06530	AT1G07940	AT1G06620		AT1G04440
AT1G09250	AT1G06645	AT1G09200	AT1G06890	AT1G08720	AT1G06180	AT1G07940	AT1G06620	AT1G07990	AT1G06650		AT1G04490
AT1G09300	AT1G06650	AT1G09210	AT1G07000	AT1G08820	AT1G06210	AT1G07990	AT1G06650	AT1G08050	AT1G06760		AT1G04530
AT1G09330	AT1G06800	AT1G09250	AT1G07020	AT1G08830	AT1G06290	AT1G08050	AT1G06760	AT1G08090	AT1G06780		AT1G04555
AT1G09390	AT1G07000	AT1G09280	AT1G07030	AT1G08900	AT1G06620	AT1G08090	AT1G06780	AT1G08350	AT1G06800		AT1G04600
AT1G09415	AT1G07020	AT1G09300	AT1G07040	AT1G08930	AT1G06650	AT1G08315	AT1G06890	AT1G08450	AT1G06890		AT1G04690
AT1G09430	AT1G07030	AT1G09330	AT1G07128	AT1G08940	AT1G06760	AT1G08350	AT1G07000	AT1G08460	AT1G07000		AT1G04750
AT1G09530	AT1G07040	AT1G09390	AT1G07135	AT1G09040	AT1G06780	AT1G08380	AT1G07020	AT1G08480	AT1G07020		AT1G04780
AT1G09630	AT1G07128	AT1G09415	AT1G07140	AT1G09050	AT1G06890	AT1G08450	AT1G07030	AT1G08530	AT1G07030		AT1G04790
AT1G09645	AT1G07140	AT1G09430	AT1G07160	AT1G09080	AT1G07000	AT1G08460	AT1G07040	AT1G08630	AT1G07040		AT1G04810
AT1G09690	AT1G07200	AT1G09530	AT1G07210	AT1G09100	AT1G07020	AT1G08480	AT1G07090	AT1G08650	AT1G07128		AT1G04820
AT1G09740	AT1G07210	AT1G09570	AT1G07220	AT1G09195	AT1G07040	AT1G08630	AT1G07128	AT1G08700	AT1G07135		AT1G04850
AT1G09780	AT1G07220	AT1G09575	AT1G07230	AT1G09200	AT1G07128	AT1G08680	AT1G07135	AT1G08720	AT1G07140		AT1G04900
AT1G09794	AT1G07230	AT1G09630	AT1G07260	AT1G09210	AT1G07135	AT1G08720	AT1G07140	AT1G08820	AT1G07220		AT1G04910
AT1G09920	AT1G07240	AT1G09645	AT1G07380	AT1G09250	AT1G07140	AT1G08770	AT1G07160	AT1G08830	AT1G07240		AT1G04960
AT1G09932	AT1G07260	AT1G09680	AT1G07400	AT1G09330	AT1G07160	AT1G08800	AT1G07170	AT1G08860	AT1G07260		AT1G04970
AT1G09970	AT1G07380	AT1G09690	AT1G07510	AT1G09390	AT1G07170	AT1G08820	AT1G07210	AT1G08890	AT1G07280		AT1G04980
AT1G10040	AT1G07400	AT1G09730	AT1G07520	AT1G09400	AT1G07220	AT1G08830	AT1G07220	AT1G08900	AT1G07380		AT1G04990
AT1G10050	AT1G07520	AT1G09740	AT1G07620	AT1G09415	AT1G07230	AT1G08860	AT1G07260	AT1G08930	AT1G07400		AT1G05000
AT1G10095	AT1G07530	AT1G09794	AT1G07630	AT1G09420	AT1G07240	AT1G08890	AT1G07280	AT1G08940	AT1G07470		AT1G05010
AT1G10130	AT1G07590	AT1G09910	AT1G07650	AT1G09430	AT1G07260	AT1G08900	AT1G07380	AT1G09040	AT1G07520		AT1G05020
AT1G10200	AT1G07620	AT1G09932	AT1G07670	AT1G09480	AT1G07400	AT1G08930	AT1G07510	AT1G09050	AT1G07620		AT1G05030
AT1G10210	AT1G07630	AT1G09940	AT1G07705	AT1G09560	AT1G07470	AT1G08940	AT1G07520	AT1G09080	AT1G07630		AT1G05060
AT1G10290	AT1G07670	AT1G09970	AT1G07810	AT1G09570	AT1G07510	AT1G08980	AT1G07615	AT1G09100	AT1G07650		AT1G05120
AT1G10340	AT1G07700	AT1G10040	AT1G07890	AT1G09630	AT1G07520	AT1G09010	AT1G07620	AT1G09195	AT1G07670		AT1G05135
AT1G10417	AT1G07705	AT1G10050	AT1G07900	AT1G09645	AT1G07530	AT1G09040	AT1G07630	AT1G09210	AT1G07705		AT1G05170
AT1G10522	AT1G07810	AT1G10070	AT1G07920	AT1G09680	AT1G07615	AT1G09100	AT1G07650	AT1G09250	AT1G07810		AT1G05180
AT1G10590	AT1G07870	AT1G10130	AT1G07930	AT1G09730	AT1G07620	AT1G09195	AT1G07670	AT1G09280	AT1G07820		AT1G05205
AT1G10630	AT1G07890	AT1G10140	AT1G07940	AT1G09740	AT1G07630	AT1G09210	AT1G07705	AT1G09300	AT1G07890		AT1G05210
AT1G10657	AT1G07900	AT1G10200	AT1G07960	AT1G09794	AT1G07670	AT1G09250	AT1G07810	AT1G09320	AT1G07900		AT1G05220
AT1G10690	AT1G07960	AT1G10210	AT1G07990	AT1G09815	AT1G07705	AT1G09320	AT1G07890	AT1G09330	AT1G07920		AT1G05270
AT1G10700	AT1G07990	AT1G10290	AT1G08050	AT1G09910	AT1G07810	AT1G09330	AT1G07900	AT1G09390	AT1G07930		AT1G05300
AT1G10760	AT1G08040	AT1G10340	AT1G08090	AT1G09930	AT1G07820	AT1G09415	AT1G07990	AT1G09400	AT1G07940		AT1G05310
AT1G10865	AT1G08050	AT1G10417	AT1G08190	AT1G09932	AT1G07890	AT1G09420	AT1G08050	AT1G09415	AT1G07950		AT1G05320
AT1G10920	AT1G08180	AT1G10590	AT1G08315	AT1G09940	AT1G07900	AT1G09430	AT1G08090	AT1G09430	AT1G07960		AT1G05340
AT1G10990	AT1G08310	AT1G10630	AT1G08320	AT1G09970	AT1G07920	AT1G09480	AT1G08125	AT1G09520	AT1G07980		AT1G05350
AT1G11000	AT1G08315	AT1G10920	AT1G08350	AT1G10040	AT1G07930	AT1G09560	AT1G08315	AT1G09560	AT1G07990		AT1G05430
AT1G11020	AT1G08320	AT1G11000	AT1G08420	AT1G10050	AT1G07960	AT1G09630	AT1G08320	AT1G09570	AT1G08050		AT1G05460
AT1G11050	AT1G08350	AT1G11020	AT1G08450	AT1G10070	AT1G07990	AT1G09645	AT1G08350	AT1G09630	AT1G08320		AT1G05500
AT1G11200	AT1G08450	AT1G11175	AT1G08460	AT1G10130	AT1G08050	AT1G09680	AT1G08420	AT1G09645	AT1G08350		AT1G05520
AT1G11300	AT1G08460	AT1G11200	AT1G08480	AT1G10140	AT1G08310	AT1G09730	AT1G08450	AT1G09680	AT1G08450		AT1G05560
AT1G11310	AT1G08465	AT1G11260	AT1G08530	AT1G10170	AT1G08315	AT1G09740	AT1G08460	AT1G09730	AT1G08460		AT1G05570
AT1G11330	AT1G08480	AT1G11290	AT1G08600	AT1G10200	AT1G08320	AT1G09910	AT1G08480	AT1G09740	AT1G08480		AT1G05575
AT1G11360	AT1G08530	AT1G11300	AT1G08630	AT1G10210	AT1G08350	AT1G09930	AT1G08530	AT1G09770	AT1G08530		AT1G05620
AT1G11475	AT1G08630	AT1G11310	AT1G08650	AT1G10290	AT1G08450	AT1G09932	AT1G08600	AT1G09794	AT1G08630		AT1G05630
AT1G11610	AT1G08650	AT1G11330	AT1G08660	AT1G10340	AT1G08460	AT1G09940	AT1G08630	AT1G09870	AT1G08650		AT1G05640
AT1G11660	AT1G08700	AT1G11350	AT1G08700	AT1G10350	AT1G08480	AT1G09970	AT1G08660	AT1G09910	AT1G08700		AT1G05675
AT1G11755	AT1G08720	AT1G11360	AT1G08720	AT1G10417	AT1G08630	AT1G10040	AT1G08720	AT1G09920	AT1G08720		AT1G05680
AT1G11840	AT1G08800	AT1G11475	AT1G08800	AT1G10430	AT1G08650	AT1G10050	AT1G08800	AT1G09932	AT1G08800		AT1G05700
AT1G11880	AT1G08820	AT1G11610	AT1G08820	AT1G10590	AT1G08700	AT1G10070	AT1G08820	AT1G09940	AT1G08820		AT1G05710
AT1G11890	AT1G08830	AT1G11660	AT1G08830	AT1G10630	AT1G08720	AT1G10130	AT1G08830	AT1G09970	AT1G08830		AT1G05720
AT1G11940	AT1G08860	AT1G11740	AT1G08860	AT1G10700	AT1G08800	AT1G10170	AT1G08860	AT1G10040	AT1G08860		AT1G05730
AT1G12050	AT1G08900	AT1G11755	AT1G08900	AT1G10720	AT1G08820	AT1G10200	AT1G08890	AT1G10050	AT1G08890		AT1G05750
AT1G12220	AT1G08930	AT1G11880	AT1G08930	AT1G10865	AT1G08830	AT1G10210	AT1G08900	AT1G10070	AT1G08900		AT1G05780
AT1G12360	AT1G08940	AT1G11890	AT1G08940	AT1G10920	AT1G08860	AT1G10290	AT1G08930	AT1G10130	AT1G08930		AT1G05790
AT1G12400	AT1G09010	AT1G11905	AT1G09010	AT1G10990	AT1G08900	AT1G10340	AT1G08940	AT1G10170	AT1G08940		AT1G05805
AT1G12470	AT1G09050	AT1G11940	AT1G09040	AT1G11000	AT1G08930	AT1G10410	AT1G09010	AT1G10200	AT1G09010		AT1G05840
AT1G12780	AT1G09080	AT1G12000	AT1G09050	AT1G11050	AT1G08940	AT1G10417	AT1G09040	AT1G10210	AT1G09040		AT1G05880
AT1G12790	AT1G09090	AT1G12210	AT1G09080	AT1G11200	AT1G09010	AT1G10630	AT1G09050	AT1G10290	AT1G09050		AT1G05890
AT1G12840	AT1G09100	AT1G12220	AT1G09100	AT1G11260	AT1G09040	AT1G10690	AT1G09080	AT1G10340	AT1G09080		AT1G05910
AT1G12845	AT1G09195	AT1G12360	AT1G09195	AT1G11270	AT1G09050	AT1G10700	AT1G09090	AT1G10417	AT1G09100		AT1G05940
AT1G12910	AT1G09200	AT1G12440	AT1G09200	AT1G11300	AT1G09060	AT1G10720	AT1G09100	AT1G10560	AT1G09195		AT1G05950
AT1G12940	AT1G09210	AT1G12470	AT1G09210	AT1G11310	AT1G09080	AT1G10730	AT1G09195	AT1G10590	AT1G09200		AT1G05970
AT1G12970	AT1G09270	AT1G12780	AT1G09270	AT1G11330	AT1G09100	AT1G10760	AT1G09210	AT1G10630	AT1G09210		AT1G06002
AT1G13000	AT1G09300	AT1G12790	AT1G09280	AT1G11350	AT1G09195	AT1G10865	AT1G09220	AT1G10690	AT1G09250		AT1G06050
AT1G13060	AT1G09330	AT1G12840	AT1G09300	AT1G11360	AT1G09200	AT1G10920	AT1G09270	AT1G10700	AT1G09270		AT1G06060
AT1G13110	AT1G09415	AT1G12910	AT1G09330	AT1G11475	AT1G09210	AT1G10990	AT1G09280	AT1G10720	AT1G09300		AT1G06080
AT1G13180	AT1G09420	AT1G12940	AT1G09400	AT1G11610	AT1G09250	AT1G11000	AT1G09300	AT1G10730	AT1G09320		AT1G06110
AT1G13210	AT1G09430	AT1G12970	AT1G09415	AT1G11660	AT1G09270	AT1G11020	AT1G09330	AT1G10865	AT1G09330		AT1G06130
AT1G13245	AT1G09480	AT1G13000	AT1G09430	AT1G11880	AT1G09300	AT1G11175	AT1G09400	AT1G10920	AT1G09400		AT1G06150
AT1G13260	AT1G09530	AT1G13060	AT1G09480	AT1G11905	AT1G09330	AT1G11200	AT1G09415	AT1G11000	AT1G09415		AT1G06160
AT1G13270	AT1G09560	AT1G13100	AT1G09500	AT1G11940	AT1G09400	AT1G11260	AT1G09420	AT1G11175	AT1G09420		AT1G06180
AT1G13340	AT1G09630	AT1G13110	AT1G09530	AT1G12220	AT1G09415	AT1G11300	AT1G09421	AT1G11200	AT1G09430		AT1G06210
AT1G13360	AT1G09645	AT1G13180	AT1G09560	AT1G12290	AT1G09420	AT1G11310	AT1G09430	AT1G11260	AT1G09480		AT1G06290
AT1G13440	AT1G09680	AT1G13210	AT1G09570	AT1G12360	AT1G09430	AT1G11330	AT1G09480	AT1G11270	AT1G09530		AT1G06400
AT1G13450	AT1G09730	AT1G13245	AT1G09590	AT1G12390	AT1G09480	AT1G11350	AT1G09530	AT1G11300	AT1G09560		AT1G06440
AT1G13460	AT1G09740	AT1G13260	AT1G09630	AT1G12400	AT1G09500	AT1G11360	AT1G09570	AT1G11310	AT1G09570		AT1G06460
AT1G13470	AT1G09780	AT1G13270	AT1G09645	AT1G12440	AT1G09530	AT1G11475	AT1G09630	AT1G11330	AT1G09590		AT1G06500
AT1G13530	AT1G09850	AT1G13360	AT1G09680	AT1G12470	AT1G09560	AT1G11480	AT1G09645	AT1G11350	AT1G09630		AT1G06510
AT1G13550	AT1G09910	AT1G13450	AT1G09690	AT1G12780	AT1G09630	AT1G11610	AT1G09680	AT1G11360	AT1G09645		AT1G06530
AT1G13570	AT1G09920	AT1G13470	AT1G09730	AT1G12840	AT1G09645	AT1G11660	AT1G09730	AT1G11475	AT1G09680		AT1G06590
AT1G13700	AT1G09930	AT1G13530	AT1G09740	AT1G12845	AT1G09680	AT1G11880	AT1G09740	AT1G11480	AT1G09730		AT1G06620
AT1G13750	AT1G09932	AT1G13550	AT1G09780	AT1G12940	AT1G09730	AT1G11910	AT1G09794	AT1G11610	AT1G09740		AT1G06630
AT1G13860	AT1G09970	AT1G13570	AT1G09870	AT1G12970	AT1G09740	AT1G11940	AT1G09850	AT1G11660	AT1G09780		AT1G06645
AT1G13930	AT1G10040	AT1G13700	AT1G09910	AT1G12990	AT1G09780	AT1G11950	AT1G09870	AT1G11755	AT1G09850		AT1G06650
AT1G13980	AT1G10050	AT1G13750	AT1G09920	AT1G13000	AT1G09794	AT1G12013	AT1G09910	AT1G11800	AT1G09870		AT1G06760
AT1G13990	AT1G10070	AT1G13980	AT1G09930	AT1G13060	AT1G09870	AT1G12200	AT1G09920	AT1G11905	AT1G09910		AT1G06780
AT1G14000	AT1G10130	AT1G13990	AT1G09932	AT1G13100	AT1G09910	AT1G12210	AT1G09930	AT1G11950	AT1G09920		AT1G06800
AT1G14010	AT1G10140	AT1G14010	AT1G09935	AT1G13110	AT1G09920	AT1G12220	AT1G09932	AT1G12013	AT1G09930		AT1G06840
AT1G14070	AT1G10150	AT1G14070	AT1G09940	AT1G13180	AT1G09930	AT1G12290	AT1G09935	AT1G12200	AT1G09932		AT1G06870
AT1G14170	AT1G10170	AT1G14140	AT1G09970	AT1G13210	AT1G09932	AT1G12360	AT1G09940	AT1G12210	AT1G09935		AT1G06890
AT1G14230	AT1G10200	AT1G14170	AT1G09980	AT1G13245	AT1G09935	AT1G12390	AT1G09970	AT1G12220	AT1G09940		AT1G07000
AT1G14250	AT1G10210	AT1G14205	AT1G10040	AT1G13340	AT1G09940	AT1G12440	AT1G10040	AT1G12280	AT1G09970		AT1G07020
AT1G14320	AT1G10290	AT1G14260	AT1G10050	AT1G13360	AT1G09970	AT1G12470	AT1G10050	AT1G12290	AT1G10040		AT1G07030
AT1G14360	AT1G10310	AT1G14320	AT1G10070	AT1G13450	AT1G10040	AT1G12760	AT1G10070	AT1G12350	AT1G10050		AT1G07040
AT1G14370	AT1G10340	AT1G14360	AT1G10130	AT1G13470	AT1G10050	AT1G12780	AT1G10130	AT1G12360	AT1G10070		AT1G07090
AT1G14380	AT1G10350	AT1G14370	AT1G10140	AT1G13520	AT1G10070	AT1G12810	AT1G10140	AT1G12470	AT1G10130		AT1G07128
AT1G14400	AT1G10410	AT1G14380	AT1G10170	AT1G13530	AT1G10130	AT1G12840	AT1G10170	AT1G12760	AT1G10140		AT1G07135
AT1G14450	AT1G10417	AT1G14400	AT1G10200	AT1G13540	AT1G10140	AT1G12910	AT1G10200	AT1G12780	AT1G10170		AT1G07140
AT1G14540	AT1G10500	AT1G14450	AT1G10210	AT1G13550	AT1G10170	AT1G12940	AT1G10210	AT1G12810	AT1G10200		AT1G07160
AT1G14570	AT1G10560	AT1G14510	AT1G10290	AT1G13570	AT1G10200	AT1G12990	AT1G10290	AT1G12840	AT1G10210		AT1G07170
AT1G14580	AT1G10590	AT1G14540	AT1G10310	AT1G13700	AT1G10210	AT1G13000	AT1G10310	AT1G12880	AT1G10290		AT1G07200
AT1G14620	AT1G10630	AT1G14570	AT1G10340	AT1G13750	AT1G10290	AT1G13060	AT1G10340	AT1G12910	AT1G10310		AT1G07210
AT1G14670	AT1G10690	AT1G14620	AT1G10410	AT1G13830	AT1G10310	AT1G13110	AT1G10410	AT1G12920	AT1G10340		AT1G07220
AT1G14740	AT1G10700	AT1G14660	AT1G10417	AT1G13980	AT1G10340	AT1G13180	AT1G10417	AT1G12940	AT1G10410		AT1G07230
AT1G14790	AT1G10720	AT1G14670	AT1G10430	AT1G13990	AT1G10350	AT1G13190	AT1G10430	AT1G12970	AT1G10417		AT1G07240
AT1G14870	AT1G10730	AT1G14740	AT1G10500	AT1G14000	AT1G10410	AT1G13195	AT1G10500	AT1G12990	AT1G10500		AT1G07260
AT1G14880	AT1G10865	AT1G14790	AT1G10560	AT1G14010	AT1G10417	AT1G13210	AT1G10560	AT1G13000	AT1G10560		AT1G07280
AT1G14910	AT1G10920	AT1G14860	AT1G10590	AT1G14070	AT1G10430	AT1G13230	AT1G10580	AT1G13040	AT1G10590		AT1G07310
AT1G14980	AT1G11050	AT1G14880	AT1G10630	AT1G14080	AT1G10500	AT1G13245	AT1G10590	AT1G13060	AT1G10630		AT1G07380
AT1G15020	AT1G11100	AT1G14910	AT1G10690	AT1G14170	AT1G10590	AT1G13270	AT1G10630	AT1G13100	AT1G10690		AT1G07390
AT1G15030	AT1G11125	AT1G15020	AT1G10700	AT1G14230	AT1G10630	AT1G13340	AT1G10700	AT1G13110	AT1G10700		AT1G07400
AT1G15120	AT1G11200	AT1G15030	AT1G10720	AT1G14260	AT1G10690	AT1G13360	AT1G10720	AT1G13180	AT1G10720		AT1G07470
AT1G15125	AT1G11300	AT1G15110	AT1G10730	AT1G14320	AT1G10700	AT1G13390	AT1G10730	AT1G13210	AT1G10730		AT1G07510
AT1G15130	AT1G11310	AT1G15120	AT1G10920	AT1G14360	AT1G10720	AT1G13450	AT1G10865	AT1G13245	AT1G10865		AT1G07520
AT1G15175	AT1G11320	AT1G15125	AT1G11000	AT1G14370	AT1G10730	AT1G13460	AT1G10920	AT1G13260	AT1G10920		AT1G07530
AT1G15400	AT1G11330	AT1G15130	AT1G11020	AT1G14380	AT1G10865	AT1G13470	AT1G10940	AT1G13270	AT1G11000		AT1G07590
AT1G15520	AT1G11480	AT1G15175	AT1G11050	AT1G14400	AT1G10920	AT1G13480	AT1G11000	AT1G13320	AT1G11050		AT1G07610
AT1G15580	AT1G11610	AT1G15350	AT1G11100	AT1G14450	AT1G11000	AT1G13520	AT1G11020	AT1G13330	AT1G11100		AT1G07615
AT1G15670	AT1G11660	AT1G15370	AT1G11200	AT1G14480	AT1G11050	AT1G13530	AT1G11050	AT1G13340	AT1G11125		AT1G07620
AT1G15740	AT1G11880	AT1G15400	AT1G11260	AT1G14510	AT1G11200	AT1G13540	AT1G11200	AT1G13360	AT1G11200		AT1G07630
AT1G15790	AT1G11890	AT1G15480	AT1G11270	AT1G14540	AT1G11260	AT1G13550	AT1G11260	AT1G13450	AT1G11240		AT1G07650
AT1G15820	AT1G11905	AT1G15520	AT1G11300	AT1G14570	AT1G11300	AT1G13570	AT1G11300	AT1G13470	AT1G11260		AT1G07670
AT1G15880	AT1G11910	AT1G15670	AT1G11310	AT1G14640	AT1G11310	AT1G13750	AT1G11310	AT1G13480	AT1G11300		AT1G07700
AT1G15890	AT1G11930	AT1G15740	AT1G11330	AT1G14660	AT1G11330	AT1G13830	AT1G11330	AT1G13520	AT1G11310		AT1G07705
AT1G16000	AT1G11940	AT1G15790	AT1G11360	AT1G14670	AT1G11360	AT1G13950	AT1G11350	AT1G13530	AT1G11320		AT1G07728
AT1G16040	AT1G12000	AT1G15800	AT1G11480	AT1G14740	AT1G11390	AT1G13980	AT1G11360	AT1G13540	AT1G11330		AT1G07750
AT1G16110	AT1G12050	AT1G15880	AT1G11610	AT1G14790	AT1G11480	AT1G13990	AT1G11440	AT1G13550	AT1G11350		AT1G07810
AT1G16130	AT1G12140	AT1G15885	AT1G11660	AT1G14870	AT1G11610	AT1G14010	AT1G11475	AT1G13570	AT1G11360		AT1G07820
AT1G16150	AT1G12200	AT1G15890	AT1G11890	AT1G14880	AT1G11660	AT1G14070	AT1G11480	AT1G13750	AT1G11475		AT1G07870
AT1G16180	AT1G12210	AT1G15910	AT1G11900	AT1G14910	AT1G11890	AT1G14080	AT1G11580	AT1G13830	AT1G11480		AT1G07890
AT1G16240	AT1G12220	AT1G16000	AT1G11905	AT1G15020	AT1G11905	AT1G14170	AT1G11610	AT1G13950	AT1G11660		AT1G07900
AT1G16260	AT1G12280	AT1G16040	AT1G11910	AT1G15030	AT1G11910	AT1G14200	AT1G11660	AT1G13980	AT1G11755		AT1G07920
AT1G16370	AT1G12290	AT1G16090	AT1G11930	AT1G15110	AT1G11930	AT1G14230	AT1G11890	AT1G13990	AT1G11890		AT1G07930
AT1G16420	AT1G12360	AT1G16110	AT1G11940	AT1G15120	AT1G11940	AT1G14260	AT1G11905	AT1G14000	AT1G11900		AT1G07940
AT1G16470	AT1G12440	AT1G16130	AT1G12000	AT1G15125	AT1G12000	AT1G14320	AT1G11910	AT1G14010	AT1G11905		AT1G07950
AT1G16560	AT1G12470	AT1G16150	AT1G12013	AT1G15130	AT1G12200	AT1G14360	AT1G11930	AT1G14070	AT1G11910		AT1G07960
AT1G16570	AT1G12680	AT1G16180	AT1G12050	AT1G15175	AT1G12210	AT1G14370	AT1G11940	AT1G14080	AT1G11930		AT1G07980
AT1G16670	AT1G12760	AT1G16240	AT1G12140	AT1G15220	AT1G12220	AT1G14380	AT1G12160	AT1G14140	AT1G11940		AT1G07990
AT1G16700	AT1G12780	AT1G16260	AT1G12200	AT1G15350	AT1G12290	AT1G14400	AT1G12210	AT1G14170	AT1G12000		AT1G08040
AT1G16810	AT1G12840	AT1G16420	AT1G12210	AT1G15400	AT1G12360	AT1G14450	AT1G12220	AT1G14200	AT1G12210		AT1G08050
AT1G16840	AT1G12910	AT1G16470	AT1G12220	AT1G15480	AT1G12440	AT1G14510	AT1G12280	AT1G14205	AT1G12220		AT1G08090
AT1G16916	AT1G12940	AT1G16510	AT1G12290	AT1G15520	AT1G12470	AT1G14540	AT1G12290	AT1G14230	AT1G12270		AT1G08125
AT1G17080	AT1G12970	AT1G16560	AT1G12360	AT1G15670	AT1G12680	AT1G14570	AT1G12360	AT1G14260	AT1G12290		AT1G08180
AT1G17145	AT1G12990	AT1G16570	AT1G12440	AT1G15740	AT1G12760	AT1G14660	AT1G12440	AT1G14320	AT1G12360		AT1G08190
AT1G17147	AT1G13000	AT1G16670	AT1G12470	AT1G15790	AT1G12840	AT1G14740	AT1G12470	AT1G14360	AT1G12440		AT1G08310
AT1G17160	AT1G13060	AT1G16700	AT1G12760	AT1G15800	AT1G12880	AT1G14780	AT1G12760	AT1G14370	AT1G12470		AT1G08315
AT1G17250	AT1G13080	AT1G16840	AT1G12780	AT1G15880	AT1G12910	AT1G14790	AT1G12780	AT1G14380	AT1G12650		AT1G08320
AT1G17270	AT1G13090	AT1G16890	AT1G12840	AT1G15890	AT1G12920	AT1G14860	AT1G12840	AT1G14400	AT1G12760		AT1G08350
AT1G17290	AT1G13110	AT1G16900	AT1G12910	AT1G15910	AT1G12940	AT1G14870	AT1G12880	AT1G14450	AT1G12840		AT1G08380
AT1G17430	AT1G13180	AT1G16916	AT1G12940	AT1G16000	AT1G12970	AT1G14880	AT1G12910	AT1G14510	AT1G12880		AT1G08420
AT1G17450	AT1G13190	AT1G17080	AT1G12970	AT1G16040	AT1G12990	AT1G14910	AT1G12940	AT1G14540	AT1G12920		AT1G08450
AT1G17455	AT1G13210	AT1G17147	AT1G12990	AT1G16090	AT1G13000	AT1G15002	AT1G12970	AT1G14570	AT1G12940		AT1G08460
AT1G17500	AT1G13245	AT1G17160	AT1G13000	AT1G16110	AT1G13060	AT1G15020	AT1G12990	AT1G14640	AT1G12970		AT1G08465
AT1G17600	AT1G13260	AT1G17240	AT1G13020	AT1G16130	AT1G13090	AT1G15030	AT1G13000	AT1G14660	AT1G12990		AT1G08480
AT1G17610	AT1G13300	AT1G17250	AT1G13040	AT1G16150	AT1G13110	AT1G15110	AT1G13020	AT1G14670	AT1G13000		AT1G08530
AT1G17745	AT1G13310	AT1G17290	AT1G13060	AT1G16180	AT1G13120	AT1G15120	AT1G13040	AT1G14740	AT1G13020		AT1G08600
AT1G17860	AT1G13340	AT1G17340	AT1G13110	AT1G16240	AT1G13180	AT1G15125	AT1G13060	AT1G14790	AT1G13040		AT1G08630
AT1G17890	AT1G13450	AT1G17350	AT1G13120	AT1G16250	AT1G13210	AT1G15130	AT1G13090	AT1G14860	AT1G13060		AT1G08650
AT1G17970	AT1G13470	AT1G17410	AT1G13180	AT1G16260	AT1G13260	AT1G15170	AT1G13100	AT1G14870	AT1G13100		AT1G08660
AT1G18030	AT1G13480	AT1G17430	AT1G13190	AT1G16420	AT1G13310	AT1G15240	AT1G13110	AT1G14880	AT1G13110		AT1G08680
AT1G18160	AT1G13520	AT1G17450	AT1G13210	AT1G16470	AT1G13320	AT1G15350	AT1G13120	AT1G14910	AT1G13180		AT1G08700
AT1G18190	AT1G13540	AT1G17455	AT1G13245	AT1G16500	AT1G13340	AT1G15380	AT1G13180	AT1G15020	AT1G13210		AT1G08720
AT1G18260	AT1G13550	AT1G17500	AT1G13260	AT1G16510	AT1G13360	AT1G15400	AT1G13210	AT1G15030	AT1G13260		AT1G08770
AT1G18390	AT1G13570	AT1G17590	AT1G13310	AT1G16540	AT1G13460	AT1G15520	AT1G13245	AT1G15120	AT1G13310		AT1G08800
AT1G18400	AT1G13700	AT1G17600	AT1G13320	AT1G16560	AT1G13470	AT1G15530	AT1G13260	AT1G15125	AT1G13340		AT1G08820
AT1G18470	AT1G13750	AT1G17610	AT1G13340	AT1G16570	AT1G13480	AT1G15670	AT1G13310	AT1G15130	AT1G13360		AT1G08830
AT1G18500	AT1G13800	AT1G17640	AT1G13360	AT1G16670	AT1G13520	AT1G15740	AT1G13340	AT1G15370	AT1G13460		AT1G08860
AT1G18540	AT1G13830	AT1G17820	AT1G13450	AT1G16700	AT1G13530	AT1G15790	AT1G13360	AT1G15400	AT1G13470		AT1G08890
AT1G18570	AT1G13860	AT1G17890	AT1G13460	AT1G16840	AT1G13540	AT1G15880	AT1G13450	AT1G15480	AT1G13480		AT1G08900
AT1G18580	AT1G13940	AT1G17970	AT1G13470	AT1G16890	AT1G13550	AT1G15890	AT1G13460	AT1G15520	AT1G13520		AT1G08930
AT1G18620	AT1G13960	AT1G17980	AT1G13480	AT1G16916	AT1G13570	AT1G16030	AT1G13470	AT1G15530	AT1G13530		AT1G08940
AT1G18640	AT1G13970	AT1G18030	AT1G13520	AT1G17080	AT1G13750	AT1G16040	AT1G13480	AT1G15670	AT1G13540		AT1G08980
AT1G18700	AT1G13980	AT1G18160	AT1G13530	AT1G17145	AT1G13830	AT1G16090	AT1G13520	AT1G15740	AT1G13550		AT1G09010
AT1G18720	AT1G13990	AT1G18260	AT1G13540	AT1G17147	AT1G13960	AT1G16110	AT1G13530	AT1G15790	AT1G13700		AT1G09040
AT1G18890	AT1G14000	AT1G18350	AT1G13550	AT1G17160	AT1G13970	AT1G16130	AT1G13540	AT1G15800	AT1G13750		AT1G09050
AT1G18910	AT1G14010	AT1G18390	AT1G13570	AT1G17240	AT1G13980	AT1G16150	AT1G13550	AT1G15880	AT1G13830		AT1G09060
AT1G19020	AT1G14070	AT1G18400	AT1G13670	AT1G17250	AT1G13990	AT1G16180	AT1G13700	AT1G15890	AT1G13950		AT1G09080
AT1G19120	AT1G14080	AT1G18470	AT1G13700	AT1G17290	AT1G14000	AT1G16240	AT1G13750	AT1G16000	AT1G13960		AT1G09090
AT1G19130	AT1G14130	AT1G18570	AT1G13750	AT1G17340	AT1G14010	AT1G16250	AT1G13800	AT1G16040	AT1G13970		AT1G09100
AT1G19180	AT1G14140	AT1G18620	AT1G13830	AT1G17350	AT1G14070	AT1G16260	AT1G13830	AT1G16090	AT1G13980		AT1G09195
AT1G19220	AT1G14170	AT1G18640	AT1G13960	AT1G17410	AT1G14080	AT1G16420	AT1G13960	AT1G16110	AT1G13990		AT1G09200
AT1G19250	AT1G14200	AT1G18670	AT1G13970	AT1G17430	AT1G14130	AT1G16470	AT1G13970	AT1G16130	AT1G14000		AT1G09210
AT1G19270	AT1G14205	AT1G18700	AT1G13980	AT1G17450	AT1G14140	AT1G16500	AT1G13980	AT1G16150	AT1G14010		AT1G09220
AT1G19310	AT1G14210	AT1G18720	AT1G13990	AT1G17455	AT1G14170	AT1G16510	AT1G13990	AT1G16180	AT1G14070		AT1G09250
AT1G19360	AT1G14230	AT1G18745	AT1G14000	AT1G17490	AT1G14230	AT1G16540	AT1G14000	AT1G16240	AT1G14080		AT1G09270
AT1G19380	AT1G14260	AT1G18773	AT1G14010	AT1G17500	AT1G14300	AT1G16560	AT1G14010	AT1G16260	AT1G14130		AT1G09280
AT1G19660	AT1G14330	AT1G18890	AT1G14070	AT1G17590	AT1G14320	AT1G16570	AT1G14070	AT1G16420	AT1G14170		AT1G09300
AT1G19670	AT1G14340	AT1G18910	AT1G14080	AT1G17600	AT1G14330	AT1G16670	AT1G14080	AT1G16470	AT1G14200		AT1G09320
AT1G19770	AT1G14360	AT1G19020	AT1G14140	AT1G17610	AT1G14360	AT1G16700	AT1G14130	AT1G16500	AT1G14230		AT1G09330
AT1G19870	AT1G14370	AT1G19130	AT1G14170	AT1G17745	AT1G14370	AT1G16810	AT1G14140	AT1G16510	AT1G14260		AT1G09390
AT1G19910	AT1G14380	AT1G19250	AT1G14230	AT1G17820	AT1G14380	AT1G16840	AT1G14170	AT1G16540	AT1G14320		AT1G09400
AT1G19960	AT1G14400	AT1G19270	AT1G14320	AT1G17860	AT1G14400	AT1G16890	AT1G14200	AT1G16560	AT1G14330		AT1G09415
AT1G20020	AT1G14510	AT1G19310	AT1G14330	AT1G17890	AT1G14540	AT1G16916	AT1G14210	AT1G16570	AT1G14360		AT1G09420
AT1G20050	AT1G14530	AT1G19360	AT1G14360	AT1G17930	AT1G14570	AT1G16930	AT1G14230	AT1G16590	AT1G14370		AT1G09421
AT1G20110	AT1G14540	AT1G19510	AT1G14370	AT1G17980	AT1G14580	AT1G17060	AT1G14260	AT1G16635	AT1G14380		AT1G09430
AT1G20200	AT1G14570	AT1G19660	AT1G14380	AT1G18030	AT1G14620	AT1G17080	AT1G14330	AT1G16670	AT1G14400		AT1G09480
AT1G20430	AT1G14580	AT1G19730	AT1G14400	AT1G18160	AT1G14660	AT1G17145	AT1G14360	AT1G16700	AT1G14520		AT1G09500
AT1G20510	AT1G14670	AT1G19770	AT1G14510	AT1G18210	AT1G14670	AT1G17147	AT1G14370	AT1G16710	AT1G14540		AT1G09520
AT1G20620	AT1G14690	AT1G19960	AT1G14530	AT1G18260	AT1G14685	AT1G17240	AT1G14380	AT1G16810	AT1G14580		AT1G09530
AT1G20630	AT1G14740	AT1G19968	AT1G14540	AT1G18270	AT1G14740	AT1G17250	AT1G14540	AT1G16840	AT1G14670		AT1G09560
AT1G20780	AT1G14790	AT1G20020	AT1G14580	AT1G18350	AT1G14790	AT1G17270	AT1G14660	AT1G16890	AT1G14740		AT1G09570
AT1G20880	AT1G14830	AT1G20050	AT1G14660	AT1G18382	AT1G14850	AT1G17290	AT1G14670	AT1G16900	AT1G14790		AT1G09575
AT1G21050	AT1G14860	AT1G20110	AT1G14670	AT1G18390	AT1G14860	AT1G17330	AT1G14740	AT1G16916	AT1G14860		AT1G09590
AT1G21100	AT1G14870	AT1G20200	AT1G14685	AT1G18470	AT1G14870	AT1G17340	AT1G14790	AT1G16930	AT1G14870		AT1G09630
AT1G21110	AT1G14880	AT1G20225	AT1G14740	AT1G18560	AT1G14880	AT1G17430	AT1G14860	AT1G16970	AT1G14880		AT1G09645
AT1G21120	AT1G14890	AT1G20430	AT1G14790	AT1G18570	AT1G14910	AT1G17450	AT1G14870	AT1G17080	AT1G14890		AT1G09680
AT1G21130	AT1G14910	AT1G20460	AT1G14850	AT1G18580	AT1G14920	AT1G17455	AT1G14880	AT1G17140	AT1G14910		AT1G09690
AT1G21240	AT1G14980	AT1G20620	AT1G14860	AT1G18620	AT1G15010	AT1G17490	AT1G14910	AT1G17145	AT1G15020		AT1G09730
AT1G21250	AT1G14990	AT1G20630	AT1G14870	AT1G18720	AT1G15020	AT1G17500	AT1G14990	AT1G17147	AT1G15120		AT1G09740
AT1G21270	AT1G15010	AT1G20760	AT1G14880	AT1G18745	AT1G15110	AT1G17590	AT1G15010	AT1G17160	AT1G15125		AT1G09770
AT1G21310	AT1G15020	AT1G20780	AT1G14890	AT1G18890	AT1G15120	AT1G17600	AT1G15020	AT1G17232	AT1G15130		AT1G09780
AT1G21326	AT1G15120	AT1G20840	AT1G14910	AT1G18910	AT1G15125	AT1G17610	AT1G15110	AT1G17240	AT1G15240		AT1G09794
AT1G21370	AT1G15125	AT1G20890	AT1G14990	AT1G19020	AT1G15130	AT1G17745	AT1G15120	AT1G17250	AT1G15370		AT1G09815
AT1G21390	AT1G15130	AT1G20970	AT1G15020	AT1G19130	AT1G15240	AT1G17780	AT1G15125	AT1G17270	AT1G15380		AT1G09850
AT1G21440	AT1G15175	AT1G21000	AT1G15110	AT1G19240	AT1G15310	AT1G17820	AT1G15130	AT1G17290	AT1G15400		AT1G09870
AT1G21450	AT1G15240	AT1G21050	AT1G15120	AT1G19250	AT1G15330	AT1G17860	AT1G15240	AT1G17330	AT1G15415		AT1G09910
AT1G21480	AT1G15310	AT1G21100	AT1G15125	AT1G19270	AT1G15370	AT1G17890	AT1G15350	AT1G17340	AT1G15430		AT1G09920
AT1G21500	AT1G15350	AT1G21110	AT1G15130	AT1G19310	AT1G15380	AT1G18075	AT1G15380	AT1G17430	AT1G15480		AT1G09930
AT1G21520	AT1G15370	AT1G21120	AT1G15240	AT1G19360	AT1G15400	AT1G18160	AT1G15400	AT1G17450	AT1G15520		AT1G09932
AT1G21525	AT1G15380	AT1G21130	AT1G15380	AT1G19380	AT1G15415	AT1G18210	AT1G15415	AT1G17455	AT1G15530		AT1G09935
AT1G21720	AT1G15400	AT1G21240	AT1G15415	AT1G19510	AT1G15430	AT1G18260	AT1G15480	AT1G17460	AT1G15670		AT1G09940
AT1G21750	AT1G15415	AT1G21250	AT1G15430	AT1G19540	AT1G15480	AT1G18270	AT1G15520	AT1G17500	AT1G15740		AT1G09970
AT1G21830	AT1G15520	AT1G21270	AT1G15480	AT1G19660	AT1G15520	AT1G18382	AT1G15530	AT1G17530	AT1G15790		AT1G09980
AT1G21840	AT1G15530	AT1G21326	AT1G15520	AT1G19690	AT1G15530	AT1G18390	AT1G15670	AT1G17590	AT1G15800		AT1G10040
AT1G21900	AT1G15580	AT1G21370	AT1G15530	AT1G19770	AT1G15670	AT1G18470	AT1G15740	AT1G17600	AT1G15860		AT1G10050
AT1G21930	AT1G15670	AT1G21390	AT1G15670	AT1G19910	AT1G15740	AT1G18560	AT1G15790	AT1G17610	AT1G15880		AT1G10070
AT1G22070	AT1G15740	AT1G21400	AT1G15740	AT1G19960	AT1G15790	AT1G18570	AT1G15800	AT1G17745	AT1G15890		AT1G10095
AT1G22180	AT1G15780	AT1G21450	AT1G15780	AT1G19968	AT1G15810	AT1G18590	AT1G15880	AT1G17780	AT1G16000		AT1G10130
AT1G22250	AT1G15790	AT1G21500	AT1G15790	AT1G20050	AT1G15860	AT1G18700	AT1G15890	AT1G17820	AT1G16040		AT1G10140
AT1G22280	AT1G15810	AT1G21520	AT1G15800	AT1G20110	AT1G15880	AT1G18720	AT1G16000	AT1G17890	AT1G16090		AT1G10150
AT1G22360	AT1G15860	AT1G21525	AT1G15880	AT1G20200	AT1G15890	AT1G18745	AT1G16040	AT1G18160	AT1G16110		AT1G10170
AT1G22370	AT1G15880	AT1G21610	AT1G15890	AT1G20225	AT1G16000	AT1G18860	AT1G16090	AT1G18210	AT1G16130		AT1G10200
AT1G22410	AT1G15890	AT1G21670	AT1G16000	AT1G20350	AT1G16040	AT1G18890	AT1G16110	AT1G18260	AT1G16150		AT1G10210
AT1G22500	AT1G16000	AT1G21680	AT1G16040	AT1G20430	AT1G16090	AT1G18910	AT1G16130	AT1G18382	AT1G16180		AT1G10290
AT1G22510	AT1G16040	AT1G21720	AT1G16060	AT1G20510	AT1G16110	AT1G19020	AT1G16150	AT1G18390	AT1G16210		AT1G10310
AT1G22540	AT1G16090	AT1G21750	AT1G16090	AT1G20575	AT1G16130	AT1G19120	AT1G16180	AT1G18470	AT1G16240		AT1G10340
AT1G22570	AT1G16110	AT1G21770	AT1G16110	AT1G20620	AT1G16180	AT1G19130	AT1G16210	AT1G18560	AT1G16260		AT1G10350
AT1G22620	AT1G16130	AT1G21830	AT1G16130	AT1G20630	AT1G16210	AT1G19180	AT1G16240	AT1G18570	AT1G16420		AT1G10410
AT1G22640	AT1G16150	AT1G21840	AT1G16150	AT1G20760	AT1G16240	AT1G19240	AT1G16260	AT1G18690	AT1G16470		AT1G10417
AT1G22650	AT1G16180	AT1G21900	AT1G16180	AT1G20780	AT1G16250	AT1G19250	AT1G16420	AT1G18720	AT1G16500		AT1G10430
AT1G22840	AT1G16210	AT1G21930	AT1G16210	AT1G20880	AT1G16260	AT1G19270	AT1G16470	AT1G18745	AT1G16510		AT1G10500
AT1G22860	AT1G16240	AT1G22060	AT1G16240	AT1G20890	AT1G16300	AT1G19300	AT1G16500	AT1G18860	AT1G16540		AT1G10522
AT1G22890	AT1G16260	AT1G22070	AT1G16260	AT1G20970	AT1G16420	AT1G19310	AT1G16510	AT1G18890	AT1G16560		AT1G10560
AT1G23000	AT1G16270	AT1G22180	AT1G16300	AT1G20980	AT1G16470	AT1G19360	AT1G16540	AT1G18910	AT1G16570		AT1G10580
AT1G23052	AT1G16420	AT1G22250	AT1G16420	AT1G21000	AT1G16500	AT1G19380	AT1G16560	AT1G19020	AT1G16590		AT1G10590
AT1G23060	AT1G16470	AT1G22280	AT1G16470	AT1G21050	AT1G16540	AT1G19510	AT1G16570	AT1G19120	AT1G16670		AT1G10630
AT1G23080	AT1G16540	AT1G22360	AT1G16510	AT1G21100	AT1G16560	AT1G19540	AT1G16640	AT1G19130	AT1G16700		AT1G10657
AT1G23100	AT1G16560	AT1G22370	AT1G16540	AT1G21110	AT1G16570	AT1G19660	AT1G16670	AT1G19240	AT1G16710		AT1G10690
AT1G23190	AT1G16570	AT1G22400	AT1G16560	AT1G21120	AT1G16670	AT1G19710	AT1G16700	AT1G19250	AT1G16740		AT1G10700
AT1G23230	AT1G16670	AT1G22500	AT1G16570	AT1G21130	AT1G16700	AT1G19770	AT1G16710	AT1G19270	AT1G16840		AT1G10720
AT1G23260	AT1G16700	AT1G22510	AT1G16670	AT1G21240	AT1G16710	AT1G19910	AT1G16840	AT1G19300	AT1G16890		AT1G10730
AT1G23390	AT1G16710	AT1G22540	AT1G16700	AT1G21250	AT1G16810	AT1G19960	AT1G16890	AT1G19310	AT1G16900		AT1G10760
AT1G23440	AT1G16810	AT1G22570	AT1G16710	AT1G21270	AT1G16840	AT1G20050	AT1G16930	AT1G19360	AT1G16970		AT1G10865
AT1G23490	AT1G16840	AT1G22620	AT1G16840	AT1G21310	AT1G16890	AT1G20110	AT1G16970	AT1G19397	AT1G17020		AT1G10920
AT1G23710	AT1G16890	AT1G22650	AT1G16890	AT1G21320	AT1G16970	AT1G20225	AT1G17020	AT1G19510	AT1G17080		AT1G10940
AT1G23830	AT1G16970	AT1G22700	AT1G16900	AT1G21326	AT1G17020	AT1G20350	AT1G17080	AT1G19660	AT1G17147		AT1G10990
AT1G23840	AT1G17020	AT1G22710	AT1G16970	AT1G21370	AT1G17080	AT1G20430	AT1G17130	AT1G19710	AT1G17160		AT1G11000
AT1G23850	AT1G17080	AT1G22840	AT1G17020	AT1G21380	AT1G17147	AT1G20510	AT1G17147	AT1G19910	AT1G17170		AT1G11020
AT1G23870	AT1G17147	AT1G22860	AT1G17070	AT1G21390	AT1G17160	AT1G20620	AT1G17160	AT1G19960	AT1G17240		AT1G11050
AT1G23900	AT1G17160	AT1G22870	AT1G17080	AT1G21400	AT1G17170	AT1G20630	AT1G17240	AT1G20050	AT1G17250		AT1G11100
AT1G23960	AT1G17170	AT1G22890	AT1G17147	AT1G21450	AT1G17250	AT1G20693	AT1G17250	AT1G20100	AT1G17270		AT1G11125
AT1G24090	AT1G17230	AT1G22920	AT1G17160	AT1G21520	AT1G17290	AT1G20760	AT1G17290	AT1G20110	AT1G17290		AT1G11175
AT1G24140	AT1G17250	AT1G23020	AT1G17170	AT1G21525	AT1G17330	AT1G20770	AT1G17330	AT1G20190	AT1G17330		AT1G11200
AT1G24145	AT1G17280	AT1G23052	AT1G17240	AT1G21550	AT1G17340	AT1G20780	AT1G17340	AT1G20200	AT1G17340		AT1G11240
AT1G24147	AT1G17290	AT1G23080	AT1G17250	AT1G21670	AT1G17380	AT1G20840	AT1G17380	AT1G20225	AT1G17430		AT1G11260
AT1G24150	AT1G17340	AT1G23090	AT1G17290	AT1G21720	AT1G17430	AT1G20880	AT1G17430	AT1G20430	AT1G17450		AT1G11270
AT1G24360	AT1G17430	AT1G23100	AT1G17330	AT1G21750	AT1G17450	AT1G20890	AT1G17450	AT1G20620	AT1G17460		AT1G11290
AT1G24440	AT1G17440	AT1G23170	AT1G17340	AT1G21770	AT1G17455	AT1G20970	AT1G17455	AT1G20630	AT1G17500		AT1G11300
AT1G24450	AT1G17450	AT1G23230	AT1G17430	AT1G21830	AT1G17500	AT1G20980	AT1G17500	AT1G20693	AT1G17590		AT1G11310
AT1G24530	AT1G17490	AT1G23260	AT1G17440	AT1G21840	AT1G17530	AT1G21000	AT1G17530	AT1G20760	AT1G17600		AT1G11320
AT1G24575	AT1G17500	AT1G23390	AT1G17450	AT1G21900	AT1G17550	AT1G21100	AT1G17550	AT1G20770	AT1G17610		AT1G11330
AT1G25220	AT1G17550	AT1G23440	AT1G17455	AT1G21930	AT1G17590	AT1G21110	AT1G17590	AT1G20780	AT1G17615		AT1G11350
AT1G25230	AT1G17580	AT1G23490	AT1G17500	AT1G22070	AT1G17600	AT1G21120	AT1G17600	AT1G20840	AT1G17744		AT1G11360
AT1G25275	AT1G17600	AT1G23510	AT1G17530	AT1G22180	AT1G17610	AT1G21130	AT1G17610	AT1G20890	AT1G17745		AT1G11390
AT1G25400	AT1G17610	AT1G23730	AT1G17550	AT1G22250	AT1G17615	AT1G21170	AT1G17615	AT1G20970	AT1G17780		AT1G11440
AT1G25540	AT1G17615	AT1G23830	AT1G17590	AT1G22280	AT1G17640	AT1G21200	AT1G17680	AT1G20980	AT1G17820		AT1G11475
AT1G25550	AT1G17640	AT1G23840	AT1G17600	AT1G22300	AT1G17680	AT1G21240	AT1G17744	AT1G21000	AT1G17860		AT1G11480
AT1G25560	AT1G17680	AT1G23870	AT1G17610	AT1G22360	AT1G17744	AT1G21250	AT1G17745	AT1G21050	AT1G17890		AT1G11580
AT1G25580	AT1G17744	AT1G23900	AT1G17615	AT1G22400	AT1G17745	AT1G21270	AT1G17780	AT1G21100	AT1G17930		AT1G11610
AT1G26130	AT1G17745	AT1G23960	AT1G17680	AT1G22500	AT1G17750	AT1G21310	AT1G17820	AT1G21110	AT1G18160		AT1G11660
AT1G26200	AT1G17820	AT1G24090	AT1G17744	AT1G22510	AT1G17820	AT1G21320	AT1G17860	AT1G21120	AT1G18210		AT1G11740
AT1G26300	AT1G17860	AT1G24095	AT1G17745	AT1G22540	AT1G17860	AT1G21370	AT1G17890	AT1G21130	AT1G18260		AT1G11755
AT1G26380	AT1G17890	AT1G24145	AT1G17750	AT1G22570	AT1G17890	AT1G21380	AT1G17930	AT1G21170	AT1G18270		AT1G11800
AT1G26390	AT1G17930	AT1G24147	AT1G17820	AT1G22620	AT1G17930	AT1G21390	AT1G18020	AT1G21200	AT1G18300		AT1G11840
AT1G26410	AT1G17970	AT1G24150	AT1G17860	AT1G22650	AT1G18160	AT1G21400	AT1G18075	AT1G21240	AT1G18382		AT1G11880
AT1G26420	AT1G18160	AT1G24360	AT1G17890	AT1G22730	AT1G18190	AT1G21450	AT1G18160	AT1G21250	AT1G18390		AT1G11890
AT1G26440	AT1G18190	AT1G24440	AT1G17990	AT1G22810	AT1G18210	AT1G21520	AT1G18210	AT1G21270	AT1G18470		AT1G11900
AT1G26460	AT1G18260	AT1G24450	AT1G18160	AT1G22840	AT1G18260	AT1G21525	AT1G18260	AT1G21310	AT1G18480		AT1G11905
AT1G26558	AT1G18270	AT1G24530	AT1G18190	AT1G22860	AT1G18270	AT1G21630	AT1G18270	AT1G21370	AT1G18570		AT1G11910
AT1G26620	AT1G18350	AT1G24575	AT1G18260	AT1G22870	AT1G18300	AT1G21670	AT1G18390	AT1G21380	AT1G18580		AT1G11930
AT1G26630	AT1G18390	AT1G25220	AT1G18270	AT1G22890	AT1G18390	AT1G21680	AT1G18470	AT1G21390	AT1G18640		AT1G11940
AT1G26670	AT1G18470	AT1G25230	AT1G18300	AT1G22920	AT1G18470	AT1G21720	AT1G18570	AT1G21400	AT1G18740		AT1G11950
AT1G26690	AT1G18500	AT1G25275	AT1G18390	AT1G23020	AT1G18480	AT1G21750	AT1G18600	AT1G21450	AT1G18800		AT1G12000
AT1G26740	AT1G18540	AT1G25375	AT1G18480	AT1G23090	AT1G18500	AT1G21770	AT1G18630	AT1G21520	AT1G18860		AT1G12013
AT1G26750	AT1G18570	AT1G25400	AT1G18500	AT1G23100	AT1G18570	AT1G21900	AT1G18690	AT1G21525	AT1G18890		AT1G12050
AT1G26840	AT1G18580	AT1G25500	AT1G18570	AT1G23140	AT1G18630	AT1G21930	AT1G18700	AT1G21580	AT1G18900		AT1G12140
AT1G26940	AT1G18640	AT1G25560	AT1G18580	AT1G23230	AT1G18640	AT1G22040	AT1G18745	AT1G21590	AT1G18910		AT1G12160
AT1G27020	AT1G18860	AT1G25580	AT1G18630	AT1G23260	AT1G18670	AT1G22070	AT1G18800	AT1G21610	AT1G19020		AT1G12200
AT1G27130	AT1G18890	AT1G26090	AT1G18640	AT1G23440	AT1G18800	AT1G22180	AT1G18860	AT1G21630	AT1G19130		AT1G12210
AT1G27150	AT1G18910	AT1G26120	AT1G18670	AT1G23490	AT1G18860	AT1G22250	AT1G18890	AT1G21670	AT1G19170		AT1G12220
AT1G27210	AT1G18940	AT1G26130	AT1G18720	AT1G23730	AT1G18890	AT1G22280	AT1G18910	AT1G21680	AT1G19250		AT1G12270
AT1G27290	AT1G19000	AT1G26200	AT1G18860	AT1G23830	AT1G18910	AT1G22360	AT1G18940	AT1G21720	AT1G19270		AT1G12280
AT1G27330	AT1G19020	AT1G26260	AT1G18890	AT1G23840	AT1G18940	AT1G22400	AT1G19020	AT1G21750	AT1G19310		AT1G12290
AT1G27350	AT1G19130	AT1G26380	AT1G18910	AT1G23870	AT1G19020	AT1G22500	AT1G19130	AT1G21770	AT1G19360		AT1G12350
AT1G27385	AT1G19170	AT1G26400	AT1G19020	AT1G23900	AT1G19130	AT1G22510	AT1G19180	AT1G21900	AT1G19520		AT1G12360
AT1G27435	AT1G19220	AT1G26410	AT1G19130	AT1G23950	AT1G19170	AT1G22540	AT1G19250	AT1G21930	AT1G19660		AT1G12390
AT1G27450	AT1G19250	AT1G26420	AT1G19250	AT1G23960	AT1G19180	AT1G22570	AT1G19270	AT1G22040	AT1G19690		AT1G12400
AT1G27730	AT1G19270	AT1G26440	AT1G19270	AT1G24050	AT1G19190	AT1G22620	AT1G19290	AT1G22070	AT1G19710		AT1G12440
AT1G27770	AT1G19290	AT1G26460	AT1G19300	AT1G24090	AT1G19250	AT1G22650	AT1G19310	AT1G22180	AT1G19870		AT1G12470
AT1G27930	AT1G19300	AT1G26620	AT1G19310	AT1G24140	AT1G19270	AT1G22840	AT1G19360	AT1G22200	AT1G19910		AT1G12650
AT1G27970	AT1G19310	AT1G26630	AT1G19360	AT1G24145	AT1G19300	AT1G22860	AT1G19396	AT1G22250	AT1G19960		AT1G12680
AT1G27980	AT1G19360	AT1G26670	AT1G19370	AT1G24147	AT1G19310	AT1G22870	AT1G19397	AT1G22280	AT1G20050		AT1G12760
AT1G28070	AT1G19380	AT1G26690	AT1G19430	AT1G24150	AT1G19360	AT1G22890	AT1G19430	AT1G22300	AT1G20100		AT1G12780
AT1G28110	AT1G19397	AT1G26740	AT1G19520	AT1G24190	AT1G19397	AT1G22900	AT1G19490	AT1G22360	AT1G20190		AT1G12790
AT1G28150	AT1G19430	AT1G26820	AT1G19660	AT1G24350	AT1G19520	AT1G23020	AT1G19510	AT1G22400	AT1G20200		AT1G12810
AT1G28190	AT1G19660	AT1G26940	AT1G19710	AT1G24360	AT1G19660	AT1G23052	AT1G19660	AT1G22500	AT1G20310		AT1G12840
AT1G28200	AT1G19670	AT1G27020	AT1G19730	AT1G24400	AT1G19670	AT1G23060	AT1G19670	AT1G22510	AT1G20350		AT1G12845
AT1G28230	AT1G19770	AT1G27110	AT1G19770	AT1G24440	AT1G19730	AT1G23090	AT1G19710	AT1G22540	AT1G20430		AT1G12880
AT1G28240	AT1G19870	AT1G27130	AT1G19870	AT1G24450	AT1G19870	AT1G23120	AT1G19870	AT1G22570	AT1G20510		AT1G12910
AT1G28250	AT1G19910	AT1G27180	AT1G19910	AT1G24460	AT1G19910	AT1G23130	AT1G19910	AT1G22620	AT1G20575		AT1G12920
AT1G28260	AT1G19960	AT1G27290	AT1G19960	AT1G24530	AT1G19960	AT1G23170	AT1G19960	AT1G22650	AT1G20620		AT1G12940
AT1G28280	AT1G20050	AT1G27310	AT1G20050	AT1G24575	AT1G20050	AT1G23230	AT1G20050	AT1G22840	AT1G20630		AT1G12970
AT1G28320	AT1G20110	AT1G27330	AT1G20110	AT1G25220	AT1G20110	AT1G23440	AT1G20200	AT1G22860	AT1G20770		AT1G12990
AT1G28370	AT1G20160	AT1G27350	AT1G20160	AT1G25230	AT1G20200	AT1G23490	AT1G20225	AT1G22870	AT1G20780		AT1G13000
AT1G28510	AT1G20200	AT1G27385	AT1G20200	AT1G25275	AT1G20225	AT1G23510	AT1G20310	AT1G22890	AT1G20840		AT1G13020
AT1G29040	AT1G20225	AT1G27450	AT1G20270	AT1G25375	AT1G20270	AT1G23830	AT1G20350	AT1G22920	AT1G20890		AT1G13040
AT1G29060	AT1G20310	AT1G27980	AT1G20310	AT1G25390	AT1G20310	AT1G23840	AT1G20460	AT1G23010	AT1G20970		AT1G13060
AT1G29150	AT1G20350	AT1G28070	AT1G20430	AT1G25400	AT1G20350	AT1G23850	AT1G20510	AT1G23020	AT1G20980		AT1G13080
AT1G29240	AT1G20460	AT1G28110	AT1G20510	AT1G25500	AT1G20460	AT1G23900	AT1G20575	AT1G23060	AT1G21000		AT1G13090
AT1G29260	AT1G20510	AT1G28190	AT1G20560	AT1G25520	AT1G20510	AT1G23960	AT1G20620	AT1G23090	AT1G21050		AT1G13100
AT1G29290	AT1G20560	AT1G28230	AT1G20575	AT1G25540	AT1G20560	AT1G24100	AT1G20630	AT1G23100	AT1G21100		AT1G13110
AT1G29310	AT1G20575	AT1G28240	AT1G20620	AT1G25560	AT1G20575	AT1G24140	AT1G20693	AT1G23120	AT1G21110		AT1G13120
AT1G29357	AT1G20620	AT1G28250	AT1G20630	AT1G25580	AT1G20620	AT1G24145	AT1G20760	AT1G23140	AT1G21120		AT1G13180
AT1G29390	AT1G20630	AT1G28260	AT1G20760	AT1G26090	AT1G20630	AT1G24147	AT1G20770	AT1G23230	AT1G21130		AT1G13190
AT1G29450	AT1G20760	AT1G28280	AT1G20770	AT1G26120	AT1G20760	AT1G24148	AT1G20780	AT1G23260	AT1G21160		AT1G13195
AT1G29460	AT1G20770	AT1G28320	AT1G20780	AT1G26130	AT1G20770	AT1G24150	AT1G20840	AT1G23360	AT1G21170		AT1G13210
AT1G29465	AT1G20780	AT1G28330	AT1G20840	AT1G26200	AT1G20780	AT1G24400	AT1G20890	AT1G23440	AT1G21200		AT1G13230
AT1G29490	AT1G20840	AT1G28510	AT1G20890	AT1G26380	AT1G20840	AT1G24440	AT1G20970	AT1G23490	AT1G21240		AT1G13245
AT1G29690	AT1G20980	AT1G28540	AT1G20970	AT1G26390	AT1G20890	AT1G24450	AT1G20980	AT1G23510	AT1G21250		AT1G13260
AT1G29715	AT1G21000	AT1G28580	AT1G20980	AT1G26410	AT1G20970	AT1G24460	AT1G21000	AT1G23830	AT1G21270		AT1G13270
AT1G29720	AT1G21050	AT1G29040	AT1G21000	AT1G26420	AT1G20980	AT1G24530	AT1G21050	AT1G23840	AT1G21310		AT1G13300
AT1G29750	AT1G21100	AT1G29060	AT1G21050	AT1G26440	AT1G21000	AT1G24575	AT1G21100	AT1G23850	AT1G21370		AT1G13310
AT1G29860	AT1G21110	AT1G29240	AT1G21100	AT1G26620	AT1G21050	AT1G25054	AT1G21110	AT1G23900	AT1G21380		AT1G13320
AT1G29910	AT1G21120	AT1G29310	AT1G21110	AT1G26630	AT1G21100	AT1G25220	AT1G21120	AT1G23935	AT1G21390		AT1G13330
AT1G29920	AT1G21130	AT1G29357	AT1G21120	AT1G26640	AT1G21110	AT1G25275	AT1G21130	AT1G23950	AT1G21400		AT1G13340
AT1G29990	AT1G21170	AT1G29450	AT1G21130	AT1G26670	AT1G21120	AT1G25280	AT1G21160	AT1G23960	AT1G21410		AT1G13360
AT1G30000	AT1G21200	AT1G29860	AT1G21170	AT1G26690	AT1G21130	AT1G25320	AT1G21170	AT1G24050	AT1G21450		AT1G13390
AT1G30300	AT1G21240	AT1G29910	AT1G21200	AT1G26730	AT1G21170	AT1G25370	AT1G21190	AT1G24090	AT1G21520		AT1G13440
AT1G30370	AT1G21250	AT1G29990	AT1G21240	AT1G26740	AT1G21190	AT1G25375	AT1G21200	AT1G24140	AT1G21525		AT1G13450
AT1G30380	AT1G21270	AT1G30000	AT1G21250	AT1G26750	AT1G21200	AT1G25390	AT1G21240	AT1G24145	AT1G21550		AT1G13460
AT1G30390	AT1G21310	AT1G30010	AT1G21270	AT1G26940	AT1G21240	AT1G25400	AT1G21250	AT1G24147	AT1G21580		AT1G13470
AT1G30420	AT1G21370	AT1G30200	AT1G21310	AT1G27000	AT1G21250	AT1G25500	AT1G21270	AT1G24150	AT1G21590		AT1G13480
AT1G30450	AT1G21380	AT1G30270	AT1G21326	AT1G27020	AT1G21270	AT1G25520	AT1G21310	AT1G24190	AT1G21610		AT1G13520
AT1G30510	AT1G21390	AT1G30300	AT1G21370	AT1G27130	AT1G21310	AT1G25560	AT1G21326	AT1G24350	AT1G21670		AT1G13530
AT1G30540	AT1G21400	AT1G30370	AT1G21380	AT1G27180	AT1G21370	AT1G25580	AT1G21370	AT1G24360	AT1G21680		AT1G13540
AT1G30550	AT1G21450	AT1G30420	AT1G21390	AT1G27330	AT1G21380	AT1G26110	AT1G21380	AT1G24440	AT1G21720		AT1G13550
AT1G30580	AT1G21480	AT1G30450	AT1G21400	AT1G27350	AT1G21390	AT1G26120	AT1G21390	AT1G24450	AT1G21750		AT1G13570
AT1G30630	AT1G21520	AT1G30460	AT1G21440	AT1G27385	AT1G21400	AT1G26130	AT1G21400	AT1G24460	AT1G21770		AT1G13670
AT1G30640	AT1G21525	AT1G30540	AT1G21450	AT1G27450	AT1G21450	AT1G26200	AT1G21450	AT1G24530	AT1G21900		AT1G13700
AT1G30720	AT1G21550	AT1G30550	AT1G21520	AT1G27530	AT1G21520	AT1G26260	AT1G21520	AT1G25220	AT1G21930		AT1G13750
AT1G30730	AT1G21590	AT1G30580	AT1G21525	AT1G27770	AT1G21525	AT1G26380	AT1G21525	AT1G25275	AT1G22060		AT1G13800
AT1G30755	AT1G21610	AT1G30620	AT1G21550	AT1G27930	AT1G21550	AT1G26390	AT1G21550	AT1G25280	AT1G22070		AT1G13830
AT1G30757	AT1G21700	AT1G30640	AT1G21580	AT1G27980	AT1G21610	AT1G26410	AT1G21610	AT1G25375	AT1G22180		AT1G13860
AT1G30820	AT1G21720	AT1G30730	AT1G21610	AT1G28070	AT1G21670	AT1G26420	AT1G21680	AT1G25390	AT1G22200		AT1G13930
AT1G30850	AT1G21750	AT1G30755	AT1G21630	AT1G28110	AT1G21700	AT1G26440	AT1G21720	AT1G25400	AT1G22250		AT1G13940
AT1G30890	AT1G21760	AT1G30757	AT1G21670	AT1G28190	AT1G21720	AT1G26550	AT1G21750	AT1G25500	AT1G22280		AT1G13950
AT1G30900	AT1G21770	AT1G30820	AT1G21680	AT1G28200	AT1G21750	AT1G26580	AT1G21770	AT1G25520	AT1G22300		AT1G13960
AT1G30910	AT1G21830	AT1G30825	AT1G21720	AT1G28230	AT1G21770	AT1G26620	AT1G21900	AT1G25540	AT1G22400		AT1G13970
AT1G31010	AT1G21900	AT1G30840	AT1G21750	AT1G28240	AT1G21780	AT1G26630	AT1G21920	AT1G25560	AT1G22410		AT1G13980
AT1G31230	AT1G21910	AT1G30850	AT1G21770	AT1G28250	AT1G21900	AT1G26640	AT1G21930	AT1G25580	AT1G22450		AT1G13990
AT1G31330	AT1G21920	AT1G30880	AT1G21830	AT1G28260	AT1G21930	AT1G26670	AT1G22040	AT1G25682	AT1G22500		AT1G14000
AT1G31340	AT1G21930	AT1G30890	AT1G21900	AT1G28280	AT1G22040	AT1G26690	AT1G22060	AT1G26110	AT1G22510		AT1G14010
AT1G31540	AT1G22070	AT1G30900	AT1G21920	AT1G28320	AT1G22070	AT1G26730	AT1G22070	AT1G26120	AT1G22570		AT1G14070
AT1G31550	AT1G22160	AT1G30910	AT1G21930	AT1G28330	AT1G22180	AT1G26740	AT1G22160	AT1G26130	AT1G22620		AT1G14080
AT1G31570	AT1G22180	AT1G31220	AT1G22020	AT1G28380	AT1G22200	AT1G26930	AT1G22180	AT1G26200	AT1G22650		AT1G14130
AT1G31580	AT1G22200	AT1G31290	AT1G22060	AT1G28510	AT1G22250	AT1G26940	AT1G22200	AT1G26260	AT1G22710		AT1G14140
AT1G31780	AT1G22280	AT1G31330	AT1G22070	AT1G28520	AT1G22280	AT1G27020	AT1G22250	AT1G26270	AT1G22730		AT1G14170
AT1G31820	AT1G22300	AT1G31540	AT1G22180	AT1G28540	AT1G22300	AT1G27090	AT1G22275	AT1G26380	AT1G22840		AT1G14200
AT1G31880	AT1G22360	AT1G31550	AT1G22200	AT1G28580	AT1G22360	AT1G27130	AT1G22280	AT1G26390	AT1G22860		AT1G14205
AT1G32120	AT1G22370	AT1G31580	AT1G22280	AT1G29040	AT1G22400	AT1G27170	AT1G22300	AT1G26410	AT1G22870		AT1G14210
AT1G32170	AT1G22400	AT1G31780	AT1G22300	AT1G29150	AT1G22410	AT1G27180	AT1G22360	AT1G26420	AT1G22890		AT1G14230
AT1G32210	AT1G22410	AT1G32120	AT1G22360	AT1G29240	AT1G22450	AT1G27330	AT1G22400	AT1G26440	AT1G22920		AT1G14250
AT1G32260	AT1G22500	AT1G32150	AT1G22400	AT1G29260	AT1G22500	AT1G27350	AT1G22440	AT1G26550	AT1G22930		AT1G14260
AT1G32460	AT1G22510	AT1G32170	AT1G22410	AT1G29280	AT1G22510	AT1G27385	AT1G22450	AT1G26580	AT1G22950		AT1G14300
AT1G32690	AT1G22540	AT1G32210	AT1G22450	AT1G29290	AT1G22570	AT1G27450	AT1G22500	AT1G26620	AT1G23010		AT1G14320
AT1G32700	AT1G22620	AT1G32260	AT1G22500	AT1G29310	AT1G22620	AT1G27530	AT1G22510	AT1G26630	AT1G23020		AT1G14330
AT1G32790	AT1G22640	AT1G32340	AT1G22510	AT1G29357	AT1G22650	AT1G27630	AT1G22540	AT1G26640	AT1G23120		AT1G14340
AT1G32920	AT1G22650	AT1G32460	AT1G22540	AT1G29690	AT1G22660	AT1G27730	AT1G22570	AT1G26670	AT1G23140		AT1G14360
AT1G32928	AT1G22660	AT1G32540	AT1G22570	AT1G29715	AT1G22840	AT1G27750	AT1G22620	AT1G26690	AT1G23170		AT1G14370
AT1G32960	AT1G22790	AT1G32580	AT1G22620	AT1G29750	AT1G22860	AT1G27770	AT1G22650	AT1G26740	AT1G23230		AT1G14380
AT1G33030	AT1G22840	AT1G32690	AT1G22650	AT1G29860	AT1G22870	AT1G27930	AT1G22660	AT1G26800	AT1G23260		AT1G14400
AT1G33055	AT1G22860	AT1G32700	AT1G22660	AT1G29960	AT1G22890	AT1G27980	AT1G22810	AT1G26830	AT1G23440		AT1G14450
AT1G33120	AT1G22870	AT1G32790	AT1G22710	AT1G29970	AT1G22930	AT1G28050	AT1G22840	AT1G26840	AT1G23490		AT1G14480
AT1G33265	AT1G22890	AT1G32920	AT1G22730	AT1G29990	AT1G22985	AT1G28070	AT1G22860	AT1G26930	AT1G23710		AT1G14510
AT1G33400	AT1G22930	AT1G33030	AT1G22840	AT1G30000	AT1G23010	AT1G28110	AT1G22870	AT1G26940	AT1G23830		AT1G14520
AT1G33420	AT1G23052	AT1G33050	AT1G22860	AT1G30200	AT1G23020	AT1G28140	AT1G22890	AT1G27000	AT1G23840		AT1G14530
AT1G33560	AT1G23060	AT1G33055	AT1G22870	AT1G30270	AT1G23060	AT1G28190	AT1G22920	AT1G27020	AT1G23850		AT1G14540
AT1G33590	AT1G23080	AT1G33250	AT1G22890	AT1G30370	AT1G23090	AT1G28200	AT1G22930	AT1G27090	AT1G23870		AT1G14570
AT1G33600	AT1G23120	AT1G33420	AT1G22920	AT1G30410	AT1G23120	AT1G28230	AT1G22985	AT1G27110	AT1G23900		AT1G14580
AT1G33610	AT1G23140	AT1G33470	AT1G22930	AT1G30420	AT1G23140	AT1G28240	AT1G23010	AT1G27180	AT1G23940		AT1G14620
AT1G33720	AT1G23170	AT1G33475	AT1G23090	AT1G30450	AT1G23190	AT1G28250	AT1G23020	AT1G27310	AT1G23950		AT1G14640
AT1G33730	AT1G23190	AT1G33610	AT1G23120	AT1G30540	AT1G23230	AT1G28260	AT1G23052	AT1G27330	AT1G23960		AT1G14660
AT1G33770	AT1G23230	AT1G33612	AT1G23140	AT1G30550	AT1G23260	AT1G28280	AT1G23060	AT1G27350	AT1G24050		AT1G14670
AT1G33780	AT1G23260	AT1G33720	AT1G23190	AT1G30580	AT1G23440	AT1G28320	AT1G23090	AT1G27435	AT1G24090		AT1G14685
AT1G33950	AT1G23390	AT1G33770	AT1G23230	AT1G30620	AT1G23490	AT1G28330	AT1G23120	AT1G27450	AT1G24095		AT1G14690
AT1G33960	AT1G23440	AT1G33950	AT1G23260	AT1G30640	AT1G23510	AT1G28380	AT1G23130	AT1G27530	AT1G24140		AT1G14740
AT1G33970	AT1G23490	AT1G33960	AT1G23390	AT1G30700	AT1G23710	AT1G28390	AT1G23140	AT1G27630	AT1G24145		AT1G14780
AT1G34020	AT1G23710	AT1G33970	AT1G23440	AT1G30720	AT1G23780	AT1G28520	AT1G23170	AT1G27650	AT1G24147		AT1G14790
AT1G34044	AT1G23780	AT1G33980	AT1G23490	AT1G30730	AT1G23830	AT1G28580	AT1G23230	AT1G27730	AT1G24150		AT1G14830
AT1G34060	AT1G23830	AT1G33990	AT1G23710	AT1G30755	AT1G23840	AT1G28660	AT1G23260	AT1G27770	AT1G24180		AT1G14850
AT1G34130	AT1G23840	AT1G34060	AT1G23830	AT1G30757	AT1G23850	AT1G29040	AT1G23440	AT1G27930	AT1G24190		AT1G14860
AT1G34180	AT1G23850	AT1G34120	AT1G23840	AT1G30820	AT1G23870	AT1G29060	AT1G23490	AT1G27980	AT1G24210		AT1G14870
AT1G34220	AT1G23870	AT1G34130	AT1G23850	AT1G30825	AT1G23900	AT1G29240	AT1G23510	AT1G28070	AT1G24360		AT1G14880
AT1G34270	AT1G23900	AT1G34150	AT1G23870	AT1G30890	AT1G23950	AT1G29280	AT1G23710	AT1G28110	AT1G24440		AT1G14890
AT1G34300	AT1G23960	AT1G34180	AT1G23900	AT1G30900	AT1G23960	AT1G29290	AT1G23780	AT1G28190	AT1G24460		AT1G14910
AT1G34340	AT1G24050	AT1G34220	AT1G23950	AT1G30910	AT1G24050	AT1G29310	AT1G23830	AT1G28200	AT1G24470		AT1G14920
AT1G34380	AT1G24090	AT1G34300	AT1G23960	AT1G31010	AT1G24090	AT1G29330	AT1G23840	AT1G28230	AT1G24510		AT1G14980
AT1G34420	AT1G24095	AT1G34340	AT1G24050	AT1G31220	AT1G24095	AT1G29357	AT1G23850	AT1G28240	AT1G24530		AT1G14990
AT1G34750	AT1G24140	AT1G34370	AT1G24090	AT1G31540	AT1G24140	AT1G29395	AT1G23870	AT1G28250	AT1G24560		AT1G15002
AT1G34760	AT1G24145	AT1G34380	AT1G24095	AT1G31550	AT1G24145	AT1G29400	AT1G23900	AT1G28260	AT1G24575		AT1G15010
AT1G35160	AT1G24147	AT1G34420	AT1G24140	AT1G31580	AT1G24147	AT1G29715	AT1G23960	AT1G28280	AT1G24706		AT1G15020
AT1G35210	AT1G24150	AT1G34750	AT1G24145	AT1G31780	AT1G24150	AT1G29800	AT1G24050	AT1G28320	AT1G25220		AT1G15030
AT1G35230	AT1G24180	AT1G34760	AT1G24147	AT1G31885	AT1G24180	AT1G29860	AT1G24090	AT1G28330	AT1G25275		AT1G15110
AT1G35350	AT1G24190	AT1G35160	AT1G24150	AT1G32120	AT1G24190	AT1G29970	AT1G24095	AT1G28380	AT1G25280		AT1G15120
AT1G35430	AT1G24360	AT1G35210	AT1G24180	AT1G32130	AT1G24300	AT1G30000	AT1G24140	AT1G28480	AT1G25380		AT1G15125
AT1G35580	AT1G24440	AT1G35220	AT1G24190	AT1G32210	AT1G24350	AT1G30200	AT1G24145	AT1G28490	AT1G25390		AT1G15130
AT1G35612	AT1G24460	AT1G35230	AT1G24240	AT1G32230	AT1G24360	AT1G30270	AT1G24147	AT1G28510	AT1G25400		AT1G15170
AT1G35620	AT1G24530	AT1G35430	AT1G24300	AT1G32260	AT1G24440	AT1G30370	AT1G24148	AT1G28520	AT1G25460		AT1G15175
AT1G35670	AT1G24560	AT1G35580	AT1G24350	AT1G32270	AT1G24460	AT1G30410	AT1G24150	AT1G28580	AT1G25480		AT1G15220
AT1G35710	AT1G24575	AT1G35612	AT1G24360	AT1G32340	AT1G24530	AT1G30420	AT1G24180	AT1G29040	AT1G25500		AT1G15240
AT1G35720	AT1G24625	AT1G35620	AT1G24440	AT1G32460	AT1G24560	AT1G30450	AT1G24190	AT1G29060	AT1G25520		AT1G15310
AT1G36060	AT1G25220	AT1G35670	AT1G24450	AT1G32540	AT1G24575	AT1G30540	AT1G24360	AT1G29071	AT1G25540		AT1G15330
AT1G36380	AT1G25275	AT1G35710	AT1G24460	AT1G32580	AT1G24706	AT1G30550	AT1G24400	AT1G29240	AT1G25550		AT1G15350
AT1G36622	AT1G25280	AT1G35720	AT1G24510	AT1G32690	AT1G25220	AT1G30620	AT1G24440	AT1G29260	AT1G25560		AT1G15370
AT1G42480	AT1G25390	AT1G36060	AT1G24530	AT1G32700	AT1G25275	AT1G30640	AT1G24450	AT1G29280	AT1G25580		AT1G15380
AT1G42990	AT1G25400	AT1G36070	AT1G24560	AT1G32790	AT1G25280	AT1G30700	AT1G24460	AT1G29310	AT1G25682		AT1G15400
AT1G43130	AT1G25480	AT1G36380	AT1G24706	AT1G32920	AT1G25375	AT1G30720	AT1G24510	AT1G29330	AT1G26090		AT1G15415
AT1G43675	AT1G25500	AT1G36940	AT1G25220	AT1G32960	AT1G25390	AT1G30730	AT1G24530	AT1G29357	AT1G26120		AT1G15430
AT1G43890	AT1G25520	AT1G36980	AT1G25275	AT1G33030	AT1G25400	AT1G30755	AT1G24560	AT1G29400	AT1G26130		AT1G15480
AT1G43910	AT1G25540	AT1G42480	AT1G25280	AT1G33050	AT1G25460	AT1G30757	AT1G24575	AT1G29490	AT1G26200		AT1G15520
AT1G44130	AT1G25550	AT1G42990	AT1G25375	AT1G33140	AT1G25480	AT1G30900	AT1G25220	AT1G29550	AT1G26260		AT1G15530
AT1G44170	AT1G25560	AT1G43130	AT1G25390	AT1G33250	AT1G25500	AT1G30910	AT1G25275	AT1G29715	AT1G26270		AT1G15580
AT1G44770	AT1G25580	AT1G43590	AT1G25400	AT1G33400	AT1G25520	AT1G31130	AT1G25375	AT1G29750	AT1G26300		AT1G15670
AT1G45000	AT1G25682	AT1G43890	AT1G25460	AT1G33420	AT1G25540	AT1G31220	AT1G25390	AT1G29850	AT1G26340		AT1G15740
AT1G45145	AT1G26120	AT1G43980	AT1G25480	AT1G33560	AT1G25560	AT1G31350	AT1G25400	AT1G29860	AT1G26380		AT1G15780
AT1G45332	AT1G26130	AT1G44130	AT1G25500	AT1G33590	AT1G25580	AT1G31480	AT1G25460	AT1G29960	AT1G26390		AT1G15790
AT1G47260	AT1G26200	AT1G44770	AT1G25520	AT1G33600	AT1G25682	AT1G31540	AT1G25480	AT1G29970	AT1G26400		AT1G15800
AT1G47290	AT1G26260	AT1G45000	AT1G25530	AT1G33610	AT1G26120	AT1G31550	AT1G25500	AT1G30000	AT1G26410		AT1G15810
AT1G47310	AT1G26300	AT1G45145	AT1G25540	AT1G33720	AT1G26130	AT1G31570	AT1G25520	AT1G30200	AT1G26420		AT1G15820
AT1G47420	AT1G26380	AT1G45163	AT1G25560	AT1G33730	AT1G26200	AT1G31580	AT1G25540	AT1G30210	AT1G26440		AT1G15860
AT1G47550	AT1G26390	AT1G45332	AT1G25580	AT1G33770	AT1G26260	AT1G31780	AT1G25560	AT1G30220	AT1G26460		AT1G15880
AT1G47640	AT1G26400	AT1G47250	AT1G25682	AT1G33950	AT1G26300	AT1G31820	AT1G25580	AT1G30270	AT1G26550		AT1G15885
AT1G47710	AT1G26410	AT1G47290	AT1G26120	AT1G33960	AT1G26380	AT1G31835	AT1G25682	AT1G30370	AT1G26580		AT1G15890
AT1G47830	AT1G26420	AT1G47310	AT1G26130	AT1G33970	AT1G26390	AT1G32120	AT1G26090	AT1G30410	AT1G26620		AT1G15910
AT1G47860	AT1G26440	AT1G47360	AT1G26200	AT1G33980	AT1G26400	AT1G32130	AT1G26120	AT1G30420	AT1G26640		AT1G16000
AT1G47890	AT1G26460	AT1G47420	AT1G26260	AT1G33990	AT1G26410	AT1G32170	AT1G26130	AT1G30450	AT1G26670		AT1G16030
AT1G48140	AT1G26550	AT1G47520	AT1G26300	AT1G34120	AT1G26420	AT1G32172	AT1G26160	AT1G30540	AT1G26690		AT1G16040
AT1G48160	AT1G26580	AT1G47550	AT1G26380	AT1G34130	AT1G26440	AT1G32210	AT1G26190	AT1G30550	AT1G26730		AT1G16060
AT1G48210	AT1G26620	AT1G47603	AT1G26390	AT1G34150	AT1G26460	AT1G32230	AT1G26200	AT1G30580	AT1G26740		AT1G16090
AT1G48280	AT1G26640	AT1G47640	AT1G26400	AT1G34180	AT1G26550	AT1G32260	AT1G26260	AT1G30620	AT1G26750		AT1G16110
AT1G48380	AT1G26670	AT1G47650	AT1G26410	AT1G34190	AT1G26580	AT1G32270	AT1G26380	AT1G30630	AT1G26800		AT1G16130
AT1G48420	AT1G26690	AT1G47830	AT1G26420	AT1G34200	AT1G26620	AT1G32340	AT1G26390	AT1G30640	AT1G26830		AT1G16150
AT1G48570	AT1G26740	AT1G47890	AT1G26440	AT1G34220	AT1G26640	AT1G32460	AT1G26400	AT1G30720	AT1G26840		AT1G16180
AT1G48900	AT1G26750	AT1G47960	AT1G26460	AT1G34260	AT1G26670	AT1G32580	AT1G26410	AT1G30730	AT1G26930		AT1G16210
AT1G49000	AT1G26800	AT1G48160	AT1G26550	AT1G34300	AT1G26690	AT1G32690	AT1G26420	AT1G30755	AT1G26940		AT1G16240
AT1G49032	AT1G26830	AT1G48170	AT1G26580	AT1G34315	AT1G26730	AT1G32700	AT1G26440	AT1G30757	AT1G27000		AT1G16250
AT1G49040	AT1G26840	AT1G48210	AT1G26620	AT1G34350	AT1G26740	AT1G32790	AT1G26550	AT1G30810	AT1G27020		AT1G16260
AT1G49050	AT1G26900	AT1G48280	AT1G26640	AT1G34370	AT1G26750	AT1G32920	AT1G26580	AT1G30890	AT1G27060		AT1G16270
AT1G49130	AT1G26930	AT1G48320	AT1G26670	AT1G34380	AT1G26830	AT1G32960	AT1G26620	AT1G30900	AT1G27100		AT1G16300
AT1G49140	AT1G26940	AT1G48370	AT1G26690	AT1G34420	AT1G26930	AT1G33030	AT1G26640	AT1G30910	AT1G27110		AT1G16370
AT1G49170	AT1G27000	AT1G48420	AT1G26730	AT1G34750	AT1G26940	AT1G33050	AT1G26670	AT1G31010	AT1G27170		AT1G16420
AT1G49350	AT1G27020	AT1G48430	AT1G26740	AT1G34760	AT1G27000	AT1G33250	AT1G26690	AT1G31130	AT1G27180		AT1G16470
AT1G49410	AT1G27100	AT1G48490	AT1G26750	AT1G35160	AT1G27020	AT1G33360	AT1G26730	AT1G31220	AT1G27310		AT1G16500
AT1G49500	AT1G27110	AT1G48605	AT1G26830	AT1G35210	AT1G27100	AT1G33590	AT1G26740	AT1G31460	AT1G27330		AT1G16510
AT1G49700	AT1G27130	AT1G49000	AT1G26900	AT1G35220	AT1G27130	AT1G33600	AT1G26750	AT1G31540	AT1G27350		AT1G16540
AT1G49710	AT1G27180	AT1G49032	AT1G26930	AT1G35230	AT1G27180	AT1G33610	AT1G26800	AT1G31550	AT1G27450		AT1G16560
AT1G49720	AT1G27290	AT1G49040	AT1G26940	AT1G35350	AT1G27320	AT1G33720	AT1G26830	AT1G31580	AT1G27530		AT1G16570
AT1G49730	AT1G27300	AT1G49050	AT1G27000	AT1G35430	AT1G27330	AT1G33770	AT1G26900	AT1G31780	AT1G27650		AT1G16590
AT1G49750	AT1G27320	AT1G49130	AT1G27020	AT1G35580	AT1G27350	AT1G33790	AT1G26930	AT1G31835	AT1G27730		AT1G16635
AT1G49850	AT1G27330	AT1G49140	AT1G27100	AT1G35620	AT1G27450	AT1G33840	AT1G26940	AT1G32120	AT1G27752		AT1G16640
AT1G50010	AT1G27350	AT1G49170	AT1G27130	AT1G35670	AT1G27530	AT1G33950	AT1G27000	AT1G32130	AT1G27770		AT1G16670
AT1G50120	AT1G27385	AT1G49180	AT1G27180	AT1G35710	AT1G27595	AT1G33960	AT1G27020	AT1G32210	AT1G27930		AT1G16700
AT1G50360	AT1G27450	AT1G49210	AT1G27290	AT1G35720	AT1G27600	AT1G33970	AT1G27100	AT1G32230	AT1G27980		AT1G16710
AT1G50430	AT1G27530	AT1G49300	AT1G27300	AT1G36050	AT1G27730	AT1G34044	AT1G27110	AT1G32260	AT1G28070		AT1G16740
AT1G50440	AT1G27730	AT1G49350	AT1G27320	AT1G36060	AT1G27752	AT1G34060	AT1G27130	AT1G32330	AT1G28110		AT1G16810
AT1G50480	AT1G27770	AT1G49480	AT1G27330	AT1G36380	AT1G27770	AT1G34120	AT1G27170	AT1G32340	AT1G28120		AT1G16840
AT1G50740	AT1G27840	AT1G49500	AT1G27350	AT1G36620	AT1G27930	AT1G34130	AT1G27180	AT1G32460	AT1G28190		AT1G16890
AT1G50940	AT1G27960	AT1G49700	AT1G27430	AT1G36622	AT1G27980	AT1G34150	AT1G27300	AT1G32540	AT1G28200		AT1G16900
AT1G51160	AT1G27970	AT1G49710	AT1G27450	AT1G42480	AT1G28070	AT1G34180	AT1G27330	AT1G32580	AT1G28210		AT1G16916
AT1G51170	AT1G27980	AT1G49720	AT1G27530	AT1G42990	AT1G28110	AT1G34200	AT1G27350	AT1G32690	AT1G28240		AT1G16930
AT1G51390	AT1G28070	AT1G49730	AT1G27720	AT1G43000	AT1G28120	AT1G34220	AT1G27450	AT1G32700	AT1G28260		AT1G16970
AT1G51400	AT1G28110	AT1G49750	AT1G27730	AT1G43130	AT1G28190	AT1G34260	AT1G27530	AT1G32790	AT1G28280		AT1G17020
AT1G51550	AT1G28190	AT1G49820	AT1G27752	AT1G43890	AT1G28200	AT1G34300	AT1G27600	AT1G32920	AT1G28320		AT1G17060
AT1G51620	AT1G28200	AT1G49850	AT1G27770	AT1G43910	AT1G28210	AT1G34315	AT1G27730	AT1G32960	AT1G28330		AT1G17070
AT1G51645	AT1G28210	AT1G50360	AT1G27840	AT1G44130	AT1G28230	AT1G34370	AT1G27752	AT1G33030	AT1G28350		AT1G17080
AT1G51650	AT1G28230	AT1G50400	AT1G27960	AT1G44770	AT1G28240	AT1G34380	AT1G27770	AT1G33050	AT1G28370		AT1G17130
AT1G51660	AT1G28240	AT1G50410	AT1G27980	AT1G45000	AT1G28250	AT1G34420	AT1G27930	AT1G33120	AT1G28380		AT1G17140
AT1G51710	AT1G28250	AT1G50430	AT1G28070	AT1G45145	AT1G28260	AT1G34750	AT1G27980	AT1G33140	AT1G28480		AT1G17145
AT1G51760	AT1G28260	AT1G50440	AT1G28110	AT1G45150	AT1G28280	AT1G35190	AT1G28070	AT1G33250	AT1G28510		AT1G17147
AT1G51790	AT1G28280	AT1G50480	AT1G28190	AT1G45332	AT1G28320	AT1G35210	AT1G28110	AT1G33265	AT1G28520		AT1G17160
AT1G51800	AT1G28320	AT1G50500	AT1G28200	AT1G46554	AT1G28370	AT1G35220	AT1G28120	AT1G33360	AT1G28580		AT1G17170
AT1G51820	AT1G28370	AT1G50510	AT1G28210	AT1G47250	AT1G28380	AT1G35230	AT1G28140	AT1G33390	AT1G29040		AT1G17230
AT1G51850	AT1G28480	AT1G50730	AT1G28240	AT1G47330	AT1G28480	AT1G35350	AT1G28190	AT1G33400	AT1G29060		AT1G17232
AT1G51860	AT1G28490	AT1G50740	AT1G28250	AT1G47420	AT1G28490	AT1G35430	AT1G28200	AT1G33420	AT1G29150		AT1G17240
AT1G51890	AT1G28510	AT1G50940	AT1G28260	AT1G47560	AT1G28510	AT1G35580	AT1G28210	AT1G33520	AT1G29240		AT1G17250
AT1G51913	AT1G28520	AT1G51160	AT1G28280	AT1G47640	AT1G28520	AT1G35620	AT1G28230	AT1G33560	AT1G29280		AT1G17270
AT1G51920	AT1G28540	AT1G51270	AT1G28320	AT1G47830	AT1G28580	AT1G35710	AT1G28240	AT1G33590	AT1G29290		AT1G17280
AT1G51940	AT1G28570	AT1G51310	AT1G28330	AT1G47840	AT1G29040	AT1G36050	AT1G28250	AT1G33610	AT1G29310		AT1G17290
AT1G52200	AT1G28580	AT1G51400	AT1G28370	AT1G47860	AT1G29060	AT1G36060	AT1G28260	AT1G33612	AT1G29330		AT1G17330
AT1G52220	AT1G29040	AT1G51645	AT1G28380	AT1G47890	AT1G29150	AT1G36070	AT1G28280	AT1G33720	AT1G29340		AT1G17340
AT1G52230	AT1G29060	AT1G51650	AT1G28420	AT1G47960	AT1G29240	AT1G36380	AT1G28320	AT1G33730	AT1G29350		AT1G17350
AT1G52260	AT1G29150	AT1G51710	AT1G28480	AT1G48140	AT1G29260	AT1G36620	AT1G28330	AT1G33950	AT1G29357		AT1G17380
AT1G52270	AT1G29240	AT1G51790	AT1G28490	AT1G48160	AT1G29280	AT1G36622	AT1G28350	AT1G33960	AT1G29400		AT1G17410
AT1G52347	AT1G29260	AT1G51800	AT1G28510	AT1G48170	AT1G29290	AT1G36640	AT1G28370	AT1G33970	AT1G29690		AT1G17430
AT1G52420	AT1G29280	AT1G51850	AT1G28520	AT1G48210	AT1G29300	AT1G36940	AT1G28380	AT1G34044	AT1G29715		AT1G17440
AT1G52600	AT1G29290	AT1G51890	AT1G28580	AT1G48280	AT1G29310	AT1G42480	AT1G28480	AT1G34120	AT1G29850		AT1G17450
AT1G52720	AT1G29310	AT1G51920	AT1G29040	AT1G48370	AT1G29330	AT1G42960	AT1G28490	AT1G34130	AT1G29860		AT1G17455
AT1G52780	AT1G29330	AT1G51940	AT1G29060	AT1G48380	AT1G29340	AT1G42990	AT1G28510	AT1G34150	AT1G29970		AT1G17460
AT1G52800	AT1G29357	AT1G52200	AT1G29150	AT1G48420	AT1G29357	AT1G43000	AT1G28520	AT1G34180	AT1G29990		AT1G17490
AT1G52910	AT1G29400	AT1G52220	AT1G29240	AT1G48430	AT1G29400	AT1G43130	AT1G28580	AT1G34190	AT1G30000		AT1G17500
AT1G53030	AT1G29550	AT1G52260	AT1G29280	AT1G48490	AT1G29690	AT1G43245	AT1G29040	AT1G34200	AT1G30040		AT1G17530
AT1G53110	AT1G29690	AT1G52290	AT1G29290	AT1G48605	AT1G29715	AT1G43620	AT1G29060	AT1G34220	AT1G30220		AT1G17550
AT1G53165	AT1G29715	AT1G52347	AT1G29310	AT1G48760	AT1G29750	AT1G43890	AT1G29150	AT1G34260	AT1G30270		AT1G17580
AT1G53170	AT1G29750	AT1G52420	AT1G29330	AT1G48900	AT1G29800	AT1G43910	AT1G29240	AT1G34300	AT1G30370		AT1G17590
AT1G53180	AT1G29850	AT1G52600	AT1G29340	AT1G49000	AT1G29860	AT1G44130	AT1G29260	AT1G34320	AT1G30400		AT1G17600
AT1G53280	AT1G29860	AT1G52710	AT1G29357	AT1G49032	AT1G29970	AT1G44170	AT1G29280	AT1G34380	AT1G30410		AT1G17610
AT1G53310	AT1G29970	AT1G52720	AT1G29400	AT1G49040	AT1G29990	AT1G44770	AT1G29290	AT1G34420	AT1G30420		AT1G17615
AT1G53320	AT1G29990	AT1G52780	AT1G29630	AT1G49050	AT1G30000	AT1G45145	AT1G29310	AT1G34750	AT1G30450		AT1G17640
AT1G53350	AT1G30000	AT1G52800	AT1G29690	AT1G49130	AT1G30040	AT1G45150	AT1G29330	AT1G35210	AT1G30460		AT1G17680
AT1G53390	AT1G30040	AT1G53030	AT1G29715	AT1G49140	AT1G30135	AT1G46554	AT1G29340	AT1G35220	AT1G30475		AT1G17744
AT1G53400	AT1G30090	AT1G53110	AT1G29750	AT1G49170	AT1G30220	AT1G47128	AT1G29357	AT1G35230	AT1G30510		AT1G17745
AT1G53440	AT1G30100	AT1G53165	AT1G29800	AT1G49180	AT1G30270	AT1G47310	AT1G29400	AT1G35350	AT1G30540		AT1G17750
AT1G53580	AT1G30200	AT1G53180	AT1G29850	AT1G49230	AT1G30370	AT1G47330	AT1G29690	AT1G35430	AT1G30550		AT1G17780
AT1G53590	AT1G30220	AT1G53280	AT1G29860	AT1G49300	AT1G30400	AT1G47420	AT1G29715	AT1G35580	AT1G30580		AT1G17820
AT1G53700	AT1G30270	AT1G53310	AT1G29970	AT1G49350	AT1G30410	AT1G47480	AT1G29800	AT1G35620	AT1G30620		AT1G17860
AT1G53710	AT1G30370	AT1G53320	AT1G29990	AT1G49480	AT1G30420	AT1G47560	AT1G29850	AT1G35710	AT1G30630		AT1G17890
AT1G53750	AT1G30400	AT1G53330	AT1G30000	AT1G49700	AT1G30450	AT1G47640	AT1G29860	AT1G35720	AT1G30640		AT1G17930
AT1G53770	AT1G30410	AT1G53350	AT1G30040	AT1G49710	AT1G30460	AT1G47830	AT1G29970	AT1G36050	AT1G30700		AT1G17970
AT1G53830	AT1G30420	AT1G53390	AT1G30090	AT1G49720	AT1G30475	AT1G47860	AT1G29990	AT1G36060	AT1G30720		AT1G17980
AT1G53850	AT1G30450	AT1G53400	AT1G30220	AT1G49730	AT1G30510	AT1G47890	AT1G30000	AT1G36070	AT1G30730		AT1G17990
AT1G53887	AT1G30510	AT1G53430	AT1G30270	AT1G49750	AT1G30540	AT1G47960	AT1G30135	AT1G36380	AT1G30755		AT1G18020
AT1G53910	AT1G30540	AT1G53440	AT1G30300	AT1G49820	AT1G30550	AT1G48090	AT1G30220	AT1G36600	AT1G30757		AT1G18030
AT1G53920	AT1G30550	AT1G53560	AT1G30370	AT1G49850	AT1G30580	AT1G48140	AT1G30270	AT1G36622	AT1G30810		AT1G18075
AT1G54000	AT1G30580	AT1G53580	AT1G30400	AT1G50170	AT1G30620	AT1G48170	AT1G30370	AT1G36975	AT1G30820		AT1G18160
AT1G54010	AT1G30620	AT1G53700	AT1G30410	AT1G50360	AT1G30630	AT1G48210	AT1G30400	AT1G37110	AT1G30825		AT1G18190
AT1G54030	AT1G30630	AT1G53710	AT1G30420	AT1G50410	AT1G30640	AT1G48280	AT1G30410	AT1G42130	AT1G30850		AT1G18210
AT1G54090	AT1G30640	AT1G53750	AT1G30450	AT1G50430	AT1G30700	AT1G48370	AT1G30420	AT1G42480	AT1G30890		AT1G18260
AT1G54115	AT1G30700	AT1G53770	AT1G30460	AT1G50440	AT1G30720	AT1G48420	AT1G30450	AT1G42990	AT1G30900		AT1G18270
AT1G54130	AT1G30720	AT1G53810	AT1G30475	AT1G50480	AT1G30730	AT1G48430	AT1G30460	AT1G43000	AT1G31010		AT1G18300
AT1G54150	AT1G30730	AT1G53850	AT1G30540	AT1G50500	AT1G30755	AT1G48490	AT1G30540	AT1G43130	AT1G31020		AT1G18350
AT1G54250	AT1G30755	AT1G53860	AT1G30550	AT1G50570	AT1G30757	AT1G48550	AT1G30550	AT1G43620	AT1G31130		AT1G18382
AT1G54320	AT1G30757	AT1G53887	AT1G30580	AT1G50730	AT1G30810	AT1G48605	AT1G30580	AT1G43890	AT1G31220		AT1G18390
AT1G54360	AT1G30810	AT1G53910	AT1G30610	AT1G50740	AT1G30820	AT1G48620	AT1G30620	AT1G43910	AT1G31230		AT1G18400
AT1G54410	AT1G30820	AT1G53920	AT1G30620	AT1G51160	AT1G30825	AT1G49000	AT1G30630	AT1G44070	AT1G31280		AT1G18470
AT1G54440	AT1G30825	AT1G54000	AT1G30630	AT1G51270	AT1G30850	AT1G49032	AT1G30640	AT1G44125	AT1G31460		AT1G18480
AT1G54510	AT1G30850	AT1G54010	AT1G30640	AT1G51390	AT1G30890	AT1G49040	AT1G30680	AT1G44130	AT1G31480		AT1G18500
AT1G54575	AT1G30890	AT1G54030	AT1G30700	AT1G51400	AT1G30900	AT1G49050	AT1G30700	AT1G44750	AT1G31540		AT1G18540
AT1G54580	AT1G30900	AT1G54090	AT1G30720	AT1G51590	AT1G30910	AT1G49130	AT1G30720	AT1G44770	AT1G31550		AT1G18560
AT1G54990	AT1G31010	AT1G54115	AT1G30730	AT1G51620	AT1G31010	AT1G49140	AT1G30730	AT1G45035	AT1G31580		AT1G18570
AT1G55080	AT1G31130	AT1G54130	AT1G30755	AT1G51645	AT1G31130	AT1G49170	AT1G30755	AT1G45145	AT1G31730		AT1G18580
AT1G55120	AT1G31220	AT1G54150	AT1G30757	AT1G51650	AT1G31220	AT1G49300	AT1G30757	AT1G45150	AT1G31780		AT1G18590
AT1G55130	AT1G31280	AT1G54250	AT1G30810	AT1G51660	AT1G31480	AT1G49470	AT1G30810	AT1G45231	AT1G31820		AT1G18600
AT1G55450	AT1G31340	AT1G54320	AT1G30820	AT1G51710	AT1G31540	AT1G49700	AT1G30825	AT1G45332	AT1G31870		AT1G18620
AT1G55730	AT1G31480	AT1G54360	AT1G30825	AT1G51760	AT1G31550	AT1G49710	AT1G30850	AT1G45976	AT1G31910		AT1G18630
AT1G55760	AT1G31540	AT1G54370	AT1G30850	AT1G51790	AT1G31580	AT1G49720	AT1G30890	AT1G47056	AT1G32120		AT1G18640
AT1G55790	AT1G31550	AT1G54440	AT1G30890	AT1G51800	AT1G31780	AT1G49820	AT1G30900	AT1G47310	AT1G32130		AT1G18670
AT1G55840	AT1G31570	AT1G54510	AT1G30900	AT1G51820	AT1G31820	AT1G49850	AT1G31010	AT1G47330	AT1G32170		AT1G18690
AT1G55850	AT1G31580	AT1G54575	AT1G31010	AT1G51850	AT1G31870	AT1G50360	AT1G31130	AT1G47360	AT1G32172		AT1G18700
AT1G55920	AT1G31730	AT1G54650	AT1G31130	AT1G51860	AT1G31910	AT1G50410	AT1G31220	AT1G47420	AT1G32210		AT1G18720
AT1G55980	AT1G31780	AT1G54680	AT1G31220	AT1G51890	AT1G32120	AT1G50430	AT1G31230	AT1G47480	AT1G32230		AT1G18740
AT1G56010	AT1G31820	AT1G54730	AT1G31540	AT1G51920	AT1G32130	AT1G50440	AT1G31290	AT1G47550	AT1G32260		AT1G18745
AT1G56020	AT1G31880	AT1G54990	AT1G31550	AT1G51940	AT1G32210	AT1G50480	AT1G31460	AT1G47560	AT1G32270		AT1G18773
AT1G56060	AT1G31910	AT1G55050	AT1G31580	AT1G52200	AT1G32230	AT1G50520	AT1G31480	AT1G47640	AT1G32330		AT1G18800
AT1G56120	AT1G32120	AT1G55080	AT1G31780	AT1G52220	AT1G32260	AT1G50560	AT1G31540	AT1G47650	AT1G32340		AT1G18860
AT1G56150	AT1G32130	AT1G55120	AT1G31820	AT1G52270	AT1G32330	AT1G50570	AT1G31550	AT1G47830	AT1G32350		AT1G18890
AT1G56220	AT1G32170	AT1G55130	AT1G31835	AT1G52290	AT1G32340	AT1G50730	AT1G31570	AT1G47860	AT1G32460		AT1G18900
AT1G56230	AT1G32210	AT1G55450	AT1G31885	AT1G52420	AT1G32350	AT1G50740	AT1G31580	AT1G47880	AT1G32490		AT1G18910
AT1G56240	AT1G32230	AT1G55475	AT1G31910	AT1G52600	AT1G32460	AT1G51160	AT1G31730	AT1G47890	AT1G32530		AT1G18940
AT1G56330	AT1G32260	AT1G55730	AT1G32120	AT1G52780	AT1G32530	AT1G51270	AT1G31780	AT1G48090	AT1G32540		AT1G19000
AT1G56340	AT1G32270	AT1G55840	AT1G32130	AT1G52800	AT1G32640	AT1G51550	AT1G31820	AT1G48140	AT1G32690		AT1G19020
AT1G56450	AT1G32330	AT1G55850	AT1G32170	AT1G53030	AT1G32690	AT1G51620	AT1G31870	AT1G48160	AT1G32700		AT1G19120
AT1G56460	AT1G32340	AT1G56060	AT1G32210	AT1G53110	AT1G32700	AT1G51645	AT1G31885	AT1G48170	AT1G32750		AT1G19130
AT1G56550	AT1G32350	AT1G56120	AT1G32230	AT1G53165	AT1G32750	AT1G51660	AT1G32120	AT1G48210	AT1G32790		AT1G19170
AT1G56700	AT1G32460	AT1G56130	AT1G32260	AT1G53170	AT1G32790	AT1G51760	AT1G32130	AT1G48280	AT1G32810		AT1G19180
AT1G57560	AT1G32690	AT1G56145	AT1G32330	AT1G53280	AT1G32870	AT1G51790	AT1G32210	AT1G48320	AT1G32870		AT1G19190
AT1G57590	AT1G32700	AT1G56150	AT1G32340	AT1G53310	AT1G32920	AT1G51800	AT1G32230	AT1G48370	AT1G32920		AT1G19220
AT1G57600	AT1G32750	AT1G56165	AT1G32350	AT1G53320	AT1G32928	AT1G51820	AT1G32260	AT1G48420	AT1G32928		AT1G19240
AT1G57620	AT1G32790	AT1G56190	AT1G32360	AT1G53330	AT1G32940	AT1G51850	AT1G32270	AT1G48430	AT1G32940		AT1G19250
AT1G57630	AT1G32940	AT1G56220	AT1G32460	AT1G53350	AT1G32950	AT1G51860	AT1G32340	AT1G48490	AT1G32950		AT1G19270
AT1G57650	AT1G32960	AT1G56240	AT1G32530	AT1G53390	AT1G32960	AT1G51890	AT1G32350	AT1G48605	AT1G32960		AT1G19290
AT1G57870	AT1G33030	AT1G56330	AT1G32690	AT1G53400	AT1G33030	AT1G51913	AT1G32460	AT1G48900	AT1G33030		AT1G19300
AT1G57990	AT1G33050	AT1G56340	AT1G32700	AT1G53430	AT1G33050	AT1G51920	AT1G32530	AT1G48960	AT1G33050		AT1G19310
AT1G58110	AT1G33250	AT1G56450	AT1G32740	AT1G53440	AT1G33140	AT1G51940	AT1G32580	AT1G49000	AT1G33120		AT1G19360
AT1G58180	AT1G33270	AT1G56460	AT1G32750	AT1G53590	AT1G33360	AT1G52155	AT1G32630	AT1G49032	AT1G33140		AT1G19370
AT1G58190	AT1G33360	AT1G56520	AT1G32790	AT1G53625	AT1G33390	AT1G52200	AT1G32640	AT1G49040	AT1G33265		AT1G19380
AT1G58200	AT1G33420	AT1G56550	AT1G32920	AT1G53700	AT1G33410	AT1G52347	AT1G32690	AT1G49050	AT1G33360		AT1G19396
AT1G58225	AT1G33475	AT1G56700	AT1G32928	AT1G53710	AT1G33420	AT1G52420	AT1G32700	AT1G49130	AT1G33390		AT1G19397
AT1G58230	AT1G33490	AT1G57560	AT1G32940	AT1G53750	AT1G33560	AT1G52450	AT1G32740	AT1G49140	AT1G33420		AT1G19430
AT1G58300	AT1G33560	AT1G57600	AT1G32960	AT1G53770	AT1G33590	AT1G52600	AT1G32750	AT1G49230	AT1G33475		AT1G19490
AT1G58420	AT1G33590	AT1G57620	AT1G33030	AT1G53830	AT1G33600	AT1G52710	AT1G32790	AT1G49240	AT1G33560		AT1G19510
AT1G58561	AT1G33600	AT1G57630	AT1G33050	AT1G53850	AT1G33720	AT1G52720	AT1G32810	AT1G49300	AT1G33600		AT1G19520
AT1G58590	AT1G33610	AT1G57650	AT1G33120	AT1G53910	AT1G33730	AT1G52780	AT1G32870	AT1G49340	AT1G33610		AT1G19540
AT1G59560	AT1G33612	AT1G57765	AT1G33140	AT1G53920	AT1G33790	AT1G52800	AT1G32920	AT1G49350	AT1G33720		AT1G19660
AT1G59580	AT1G33720	AT1G57870	AT1G33250	AT1G54010	AT1G33840	AT1G53030	AT1G32928	AT1G49410	AT1G33730		AT1G19670
AT1G59590	AT1G33730	AT1G57990	AT1G33265	AT1G54030	AT1G33940	AT1G53110	AT1G32940	AT1G49470	AT1G33790		AT1G19690
AT1G59600	AT1G33770	AT1G58110	AT1G33360	AT1G54090	AT1G33950	AT1G53165	AT1G32960	AT1G49480	AT1G33840		AT1G19710
AT1G59610	AT1G33780	AT1G58180	AT1G33410	AT1G54115	AT1G33960	AT1G53180	AT1G33030	AT1G49700	AT1G33940		AT1G19730
AT1G59620	AT1G33950	AT1G58190	AT1G33420	AT1G54130	AT1G33970	AT1G53280	AT1G33050	AT1G49710	AT1G33950		AT1G19770
AT1G59650	AT1G33960	AT1G58200	AT1G33475	AT1G54150	AT1G33980	AT1G53310	AT1G33120	AT1G49720	AT1G33960		AT1G19870
AT1G59710	AT1G33970	AT1G58230	AT1G33560	AT1G54160	AT1G34044	AT1G53320	AT1G33140	AT1G49750	AT1G33970		AT1G19910
AT1G59870	AT1G34044	AT1G58235	AT1G33590	AT1G54210	AT1G34060	AT1G53330	AT1G33265	AT1G49820	AT1G33980		AT1G19960
AT1G59950	AT1G34060	AT1G58300	AT1G33600	AT1G54320	AT1G34120	AT1G53340	AT1G33390	AT1G49850	AT1G34044		AT1G19968
AT1G59960	AT1G34120	AT1G58350	AT1G33610	AT1G54360	AT1G34130	AT1G53350	AT1G33410	AT1G50030	AT1G34120		AT1G20020
AT1G59990	AT1G34130	AT1G58561	AT1G33680	AT1G54410	AT1G34180	AT1G53390	AT1G33420	AT1G50180	AT1G34130		AT1G20050
AT1G60000	AT1G34180	AT1G58590	AT1G33720	AT1G54490	AT1G34190	AT1G53430	AT1G33560	AT1G50360	AT1G34180		AT1G20100
AT1G60140	AT1G34190	AT1G59560	AT1G33730	AT1G54575	AT1G34200	AT1G53440	AT1G33600	AT1G50380	AT1G34190		AT1G20110
AT1G60220	AT1G34220	AT1G59580	AT1G33790	AT1G54990	AT1G34220	AT1G53560	AT1G33610	AT1G50400	AT1G34200		AT1G20160
AT1G60420	AT1G34260	AT1G59590	AT1G33840	AT1G55050	AT1G34300	AT1G53570	AT1G33720	AT1G50410	AT1G34220		AT1G20190
AT1G60490	AT1G34300	AT1G59600	AT1G33940	AT1G55120	AT1G34370	AT1G53580	AT1G33730	AT1G50430	AT1G34300		AT1G20200
AT1G60730	AT1G34370	AT1G59610	AT1G33950	AT1G55365	AT1G34380	AT1G53625	AT1G33780	AT1G50440	AT1G34360		AT1G20225
AT1G60780	AT1G34380	AT1G59620	AT1G33960	AT1G55450	AT1G34420	AT1G53650	AT1G33790	AT1G50480	AT1G34370		AT1G20270
AT1G60840	AT1G34420	AT1G59650	AT1G33970	AT1G55475	AT1G34470	AT1G53710	AT1G33840	AT1G50500	AT1G34380		AT1G20310
AT1G60910	AT1G34630	AT1G59710	AT1G34060	AT1G55730	AT1G34750	AT1G53750	AT1G33950	AT1G50510	AT1G34420		AT1G20350
AT1G60940	AT1G34750	AT1G59870	AT1G34120	AT1G55840	AT1G35160	AT1G53770	AT1G33960	AT1G50520	AT1G34750		AT1G20430
AT1G61240	AT1G34760	AT1G59950	AT1G34130	AT1G55850	AT1G35190	AT1G53830	AT1G33970	AT1G50570	AT1G34760		AT1G20460
AT1G61250	AT1G35160	AT1G59960	AT1G34150	AT1G55980	AT1G35210	AT1G53850	AT1G33980	AT1G50700	AT1G35160		AT1G20510
AT1G61260	AT1G35190	AT1G59990	AT1G34180	AT1G56060	AT1G35220	AT1G53910	AT1G34044	AT1G50730	AT1G35190		AT1G20560
AT1G61360	AT1G35210	AT1G60140	AT1G34190	AT1G56120	AT1G35230	AT1G53920	AT1G34060	AT1G50735	AT1G35210		AT1G20575
AT1G61370	AT1G35220	AT1G60220	AT1G34220	AT1G56130	AT1G35350	AT1G54000	AT1G34120	AT1G50740	AT1G35220		AT1G20620
AT1G61420	AT1G35230	AT1G60420	AT1G34300	AT1G56140	AT1G35560	AT1G54010	AT1G34130	AT1G50940	AT1G35230		AT1G20630
AT1G61430	AT1G35320	AT1G60440	AT1G34315	AT1G56145	AT1G35580	AT1G54030	AT1G34150	AT1G51160	AT1G35300		AT1G20693
AT1G61520	AT1G35350	AT1G60490	AT1G34370	AT1G56150	AT1G35620	AT1G54090	AT1G34160	AT1G51270	AT1G35350		AT1G20760
AT1G61560	AT1G35560	AT1G60940	AT1G34380	AT1G56220	AT1G35660	AT1G54100	AT1G34180	AT1G51402	AT1G35580		AT1G20770
AT1G61670	AT1G35580	AT1G60989	AT1G34420	AT1G56240	AT1G35710	AT1G54115	AT1G34190	AT1G51590	AT1G35590		AT1G20780
AT1G61690	AT1G35620	AT1G61150	AT1G34750	AT1G56250	AT1G35720	AT1G54130	AT1G34200	AT1G51620	AT1G35612		AT1G20840
AT1G61780	AT1G35660	AT1G61170	AT1G35160	AT1G56330	AT1G36050	AT1G54150	AT1G34220	AT1G51645	AT1G35620		AT1G20880
AT1G61790	AT1G35670	AT1G61180	AT1G35190	AT1G56340	AT1G36070	AT1G54210	AT1G34300	AT1G51660	AT1G35660		AT1G20890
AT1G61795	AT1G35710	AT1G61250	AT1G35210	AT1G56423	AT1G36200	AT1G54320	AT1G34370	AT1G51710	AT1G35670		AT1G20970
AT1G61800	AT1G35720	AT1G61350	AT1G35220	AT1G56450	AT1G36620	AT1G54340	AT1G34380	AT1G51790	AT1G35710		AT1G20980
AT1G61850	AT1G36050	AT1G61360	AT1G35230	AT1G56460	AT1G36622	AT1G54360	AT1G34420	AT1G51800	AT1G35720		AT1G21000
AT1G62020	AT1G36070	AT1G61370	AT1G35350	AT1G56540	AT1G36640	AT1G54370	AT1G34470	AT1G51850	AT1G36050		AT1G21050
AT1G62040	AT1G36620	AT1G61420	AT1G35580	AT1G56550	AT1G40101	AT1G54410	AT1G34630	AT1G51860	AT1G36060		AT1G21100
AT1G62200	AT1G36622	AT1G61430	AT1G35590	AT1G56590	AT1G42480	AT1G54490	AT1G34750	AT1G51890	AT1G36070		AT1G21110
AT1G62300	AT1G36640	AT1G61460	AT1G35612	AT1G56700	AT1G42990	AT1G54510	AT1G34760	AT1G51913	AT1G36200		AT1G21120
AT1G62422	AT1G36940	AT1G61490	AT1G35620	AT1G57560	AT1G43130	AT1G54575	AT1G35190	AT1G51920	AT1G36470		AT1G21130
AT1G62430	AT1G42480	AT1G61510	AT1G35660	AT1G57600	AT1G43770	AT1G54660	AT1G35210	AT1G51940	AT1G36600		AT1G21160
AT1G62790	AT1G42990	AT1G61550	AT1G35670	AT1G57620	AT1G43890	AT1G54990	AT1G35220	AT1G52200	AT1G36622		AT1G21170
AT1G62810	AT1G43130	AT1G61560	AT1G35710	AT1G57630	AT1G43910	AT1G55050	AT1G35230	AT1G52260	AT1G36975		AT1G21190
AT1G62820	AT1G43160	AT1G61670	AT1G35720	AT1G57650	AT1G44125	AT1G55080	AT1G35350	AT1G52290	AT1G37110		AT1G21200
AT1G63000	AT1G43690	AT1G61690	AT1G36050	AT1G57765	AT1G44130	AT1G55090	AT1G35580	AT1G52360	AT1G37801		AT1G21240
AT1G63110	AT1G43890	AT1G61780	AT1G36060	AT1G57870	AT1G44350	AT1G55120	AT1G35612	AT1G52370	AT1G37867		AT1G21250
AT1G63220	AT1G43910	AT1G61790	AT1G36070	AT1G57990	AT1G44770	AT1G55210	AT1G35620	AT1G52380	AT1G39190		AT1G21270
AT1G63350	AT1G44130	AT1G61800	AT1G36200	AT1G58110	AT1G44790	AT1G55265	AT1G35660	AT1G52420	AT1G40123		AT1G21310
AT1G63460	AT1G44170	AT1G61850	AT1G36600	AT1G58180	AT1G45000	AT1G55280	AT1G35670	AT1G52600	AT1G42480		AT1G21320
AT1G63690	AT1G44350	AT1G62040	AT1G36620	AT1G58190	AT1G45145	AT1G55365	AT1G35710	AT1G52710	AT1G42705		AT1G21326
AT1G63720	AT1G44770	AT1G62200	AT1G36622	AT1G58200	AT1G45150	AT1G55420	AT1G35720	AT1G52780	AT1G42990		AT1G21370
AT1G63730	AT1G44790	AT1G62300	AT1G37110	AT1G58225	AT1G45231	AT1G55430	AT1G36050	AT1G52800	AT1G43130		AT1G21380
AT1G63740	AT1G45000	AT1G62305	AT1G42480	AT1G58230	AT1G45332	AT1G55450	AT1G36070	AT1G53030	AT1G43860		AT1G21390
AT1G63800	AT1G45145	AT1G62422	AT1G42990	AT1G58300	AT1G47056	AT1G55510	AT1G36380	AT1G53100	AT1G43890		AT1G21400
AT1G63830	AT1G45231	AT1G62430	AT1G43130	AT1G58420	AT1G47250	AT1G55540	AT1G36622	AT1G53110	AT1G43910		AT1G21410
AT1G63860	AT1G45233	AT1G62730	AT1G43502	AT1G58561	AT1G47260	AT1G55590	AT1G42480	AT1G53160	AT1G44070		AT1G21440
AT1G63880	AT1G47128	AT1G62790	AT1G43890	AT1G59520	AT1G47310	AT1G55610	AT1G42990	AT1G53165	AT1G44130		AT1G21450
AT1G63900	AT1G47200	AT1G62820	AT1G43910	AT1G59580	AT1G47330	AT1G55730	AT1G43000	AT1G53280	AT1G44510		AT1G21480
AT1G63970	AT1G47250	AT1G63110	AT1G44130	AT1G59590	AT1G47420	AT1G55790	AT1G43130	AT1G53310	AT1G44750		AT1G21500
AT1G64170	AT1G47270	AT1G63350	AT1G44170	AT1G59610	AT1G47480	AT1G55840	AT1G43770	AT1G53320	AT1G44770		AT1G21520
AT1G64280	AT1G47310	AT1G63460	AT1G44770	AT1G59620	AT1G47550	AT1G55850	AT1G43860	AT1G53330	AT1G44790		AT1G21525
AT1G64385	AT1G47330	AT1G63500	AT1G44790	AT1G59650	AT1G47560	AT1G55860	AT1G43890	AT1G53350	AT1G44800		AT1G21550
AT1G64460	AT1G47420	AT1G63610	AT1G45000	AT1G59710	AT1G47603	AT1G55920	AT1G43910	AT1G53390	AT1G45000		AT1G21580
AT1G64470	AT1G47480	AT1G63690	AT1G45145	AT1G59820	AT1G47640	AT1G55980	AT1G44130	AT1G53440	AT1G45035		AT1G21590
AT1G64520	AT1G47550	AT1G63730	AT1G45150	AT1G59870	AT1G47750	AT1G56010	AT1G44170	AT1G53700	AT1G45050		AT1G21610
AT1G64650	AT1G47560	AT1G63740	AT1G45231	AT1G59950	AT1G47830	AT1G56020	AT1G44350	AT1G53710	AT1G45145		AT1G21630
AT1G64710	AT1G47640	AT1G63800	AT1G45233	AT1G59960	AT1G47890	AT1G56060	AT1G44770	AT1G53750	AT1G45150		AT1G21670
AT1G65040	AT1G47710	AT1G63830	AT1G47128	AT1G59990	AT1G47960	AT1G56120	AT1G44780	AT1G53760	AT1G45231		AT1G21680
AT1G65250	AT1G47750	AT1G63880	AT1G47250	AT1G60140	AT1G48000	AT1G56130	AT1G44790	AT1G53770	AT1G45233		AT1G21700
AT1G65270	AT1G47830	AT1G64170	AT1G47310	AT1G60220	AT1G48050	AT1G56140	AT1G45000	AT1G53830	AT1G45332		AT1G21720
AT1G65390	AT1G47840	AT1G64280	AT1G47360	AT1G60420	AT1G48090	AT1G56145	AT1G45145	AT1G53850	AT1G47250		AT1G21750
AT1G65484	AT1G47880	AT1G64370	AT1G47420	AT1G60440	AT1G48160	AT1G56150	AT1G45150	AT1G53887	AT1G47310		AT1G21760
AT1G65486	AT1G47890	AT1G64385	AT1G47550	AT1G60490	AT1G48170	AT1G56220	AT1G45231	AT1G53910	AT1G47360		AT1G21770
AT1G65500	AT1G47960	AT1G64400	AT1G47560	AT1G60730	AT1G48200	AT1G56240	AT1G45332	AT1G53920	AT1G47420		AT1G21780
AT1G65520	AT1G48000	AT1G64405	AT1G47603	AT1G60989	AT1G48210	AT1G56250	AT1G47200	AT1G54000	AT1G47480		AT1G21830
AT1G65610	AT1G48090	AT1G64460	AT1G47640	AT1G60995	AT1G48370	AT1G56280	AT1G47250	AT1G54010	AT1G47550		AT1G21840
AT1G65690	AT1G48120	AT1G64470	AT1G47650	AT1G61150	AT1G48410	AT1G56300	AT1G47310	AT1G54030	AT1G47560		AT1G21900
AT1G65720	AT1G48160	AT1G64520	AT1G47830	AT1G61170	AT1G48430	AT1G56340	AT1G47420	AT1G54115	AT1G47603		AT1G21910
AT1G65790	AT1G48170	AT1G64610	AT1G47880	AT1G61180	AT1G48490	AT1G56450	AT1G47480	AT1G54150	AT1G47640		AT1G21920
AT1G65800	AT1G48210	AT1G64650	AT1G47890	AT1G61250	AT1G48570	AT1G56460	AT1G47550	AT1G54170	AT1G47830		AT1G21930
AT1G65820	AT1G48280	AT1G64710	AT1G48000	AT1G61360	AT1G48605	AT1G56470	AT1G47560	AT1G54210	AT1G47860		AT1G22020
AT1G65845	AT1G48360	AT1G64890	AT1G48050	AT1G61370	AT1G48760	AT1G56550	AT1G47603	AT1G54320	AT1G47880		AT1G22040
AT1G65850	AT1G48370	AT1G65040	AT1G48090	AT1G61380	AT1G48850	AT1G56700	AT1G47640	AT1G54360	AT1G47890		AT1G22060
AT1G65960	AT1G48380	AT1G65270	AT1G48140	AT1G61420	AT1G48900	AT1G57540	AT1G47830	AT1G54370	AT1G48050		AT1G22070
AT1G65970	AT1G48430	AT1G65360	AT1G48160	AT1G61430	AT1G48970	AT1G57560	AT1G47840	AT1G54410	AT1G48090		AT1G22160
AT1G65980	AT1G48490	AT1G65484	AT1G48170	AT1G61460	AT1G49000	AT1G57600	AT1G47880	AT1G54490	AT1G48140		AT1G22180
AT1G66090	AT1G48605	AT1G65486	AT1G48200	AT1G61490	AT1G49040	AT1G57620	AT1G47890	AT1G54575	AT1G48160		AT1G22200
AT1G66160	AT1G48760	AT1G65520	AT1G48210	AT1G61560	AT1G49050	AT1G57630	AT1G47960	AT1G54990	AT1G48170		AT1G22250
AT1G66173	AT1G48790	AT1G65540	AT1G48280	AT1G61640	AT1G49170	AT1G57650	AT1G47980	AT1G55080	AT1G48200		AT1G22275
AT1G66240	AT1G48850	AT1G65590	AT1G48320	AT1G61670	AT1G49300	AT1G57790	AT1G48000	AT1G55120	AT1G48210		AT1G22280
AT1G66410	AT1G48900	AT1G65720	AT1G48370	AT1G61690	AT1G49340	AT1G57870	AT1G48050	AT1G55365	AT1G48280		AT1G22300
AT1G66580	AT1G48970	AT1G65790	AT1G48410	AT1G61780	AT1G49350	AT1G57980	AT1G48090	AT1G55450	AT1G48370		AT1G22360
AT1G66590	AT1G49000	AT1G65800	AT1G48430	AT1G61790	AT1G49360	AT1G57990	AT1G48140	AT1G55475	AT1G48430		AT1G22370
AT1G66600	AT1G49040	AT1G65820	AT1G48440	AT1G61800	AT1G49480	AT1G58030	AT1G48160	AT1G55540	AT1G48490		AT1G22400
AT1G66670	AT1G49050	AT1G65845	AT1G48490	AT1G61850	AT1G49540	AT1G58060	AT1G48170	AT1G55590	AT1G48605		AT1G22410
AT1G66700	AT1G49130	AT1G65850	AT1G48570	AT1G62040	AT1G49670	AT1G58110	AT1G48200	AT1G55730	AT1G48760		AT1G22440
AT1G66880	AT1G49170	AT1G65980	AT1G48605	AT1G62200	AT1G49710	AT1G58180	AT1G48210	AT1G55790	AT1G48900		AT1G22450
AT1G66900	AT1G49180	AT1G66150	AT1G48760	AT1G62300	AT1G49820	AT1G58190	AT1G48280	AT1G55840	AT1G48960		AT1G22500
AT1G66920	AT1G49300	AT1G66240	AT1G48790	AT1G62305	AT1G49850	AT1G58220	AT1G48360	AT1G55850	AT1G48970		AT1G22510
AT1G66940	AT1G49340	AT1G66410	AT1G48850	AT1G62310	AT1G49900	AT1G58225	AT1G48370	AT1G55860	AT1G49000		AT1G22540
AT1G66960	AT1G49350	AT1G66590	AT1G48900	AT1G62422	AT1G49970	AT1G58230	AT1G48430	AT1G55880	AT1G49040		AT1G22570
AT1G66970	AT1G49360	AT1G66600	AT1G48970	AT1G62600	AT1G50030	AT1G58410	AT1G48490	AT1G55910	AT1G49050		AT1G22620
AT1G66980	AT1G49480	AT1G66670	AT1G49000	AT1G62730	AT1G50170	AT1G58420	AT1G48510	AT1G55980	AT1G49170		AT1G22640
AT1G67000	AT1G49670	AT1G66700	AT1G49040	AT1G62790	AT1G50360	AT1G58561	AT1G48605	AT1G56010	AT1G49230		AT1G22650
AT1G67050	AT1G49710	AT1G66880	AT1G49050	AT1G62810	AT1G50380	AT1G58590	AT1G48760	AT1G56020	AT1G49240		AT1G22660
AT1G67060	AT1G49730	AT1G66900	AT1G49170	AT1G62820	AT1G50400	AT1G59580	AT1G48900	AT1G56060	AT1G49300		AT1G22700
AT1G67080	AT1G49750	AT1G66910	AT1G49180	AT1G63110	AT1G50410	AT1G59590	AT1G48960	AT1G56120	AT1G49340		AT1G22710
AT1G67140	AT1G49820	AT1G66940	AT1G49300	AT1G63350	AT1G50430	AT1G59600	AT1G49000	AT1G56130	AT1G49350		AT1G22730
AT1G67190	AT1G49850	AT1G66970	AT1G49340	AT1G63380	AT1G50440	AT1G59610	AT1G49040	AT1G56140	AT1G49360		AT1G22790
AT1G67250	AT1G49970	AT1G66980	AT1G49350	AT1G63460	AT1G50480	AT1G59650	AT1G49050	AT1G56145	AT1G49480		AT1G22810
AT1G67350	AT1G50030	AT1G67050	AT1G49360	AT1G63500	AT1G50500	AT1G59700	AT1G49160	AT1G56150	AT1G49540		AT1G22840
AT1G67490	AT1G50170	AT1G67060	AT1G49480	AT1G63720	AT1G50560	AT1G59710	AT1G49170	AT1G56165	AT1G49670		AT1G22860
AT1G67500	AT1G50180	AT1G67080	AT1G49540	AT1G63730	AT1G50570	AT1G59820	AT1G49230	AT1G56190	AT1G49710		AT1G22870
AT1G67520	AT1G50360	AT1G67190	AT1G49670	AT1G63740	AT1G50700	AT1G59865	AT1G49350	AT1G56220	AT1G49720		AT1G22890
AT1G67550	AT1G50410	AT1G67250	AT1G49710	AT1G63750	AT1G50740	AT1G59870	AT1G49360	AT1G56240	AT1G49750		AT1G22900
AT1G67620	AT1G50430	AT1G67265	AT1G49750	AT1G63800	AT1G50940	AT1G59950	AT1G49480	AT1G56290	AT1G49820		AT1G22920
AT1G67740	AT1G50440	AT1G67310	AT1G49820	AT1G63830	AT1G51160	AT1G59960	AT1G49540	AT1G56330	AT1G49850		AT1G22930
AT1G67785	AT1G50480	AT1G67490	AT1G49850	AT1G63860	AT1G51270	AT1G60220	AT1G49670	AT1G56340	AT1G49900		AT1G22950
AT1G67800	AT1G50500	AT1G67520	AT1G49900	AT1G63880	AT1G51390	AT1G60420	AT1G49710	AT1G56423	AT1G49970		AT1G22985
AT1G67810	AT1G50520	AT1G67550	AT1G50030	AT1G63900	AT1G51540	AT1G60440	AT1G49720	AT1G56440	AT1G50030		AT1G23000
AT1G67850	AT1G50570	AT1G67785	AT1G50170	AT1G64065	AT1G51550	AT1G60490	AT1G49820	AT1G56450	AT1G50170		AT1G23010
AT1G67900	AT1G50700	AT1G67800	AT1G50180	AT1G64170	AT1G51590	AT1G60730	AT1G49850	AT1G56460	AT1G50180		AT1G23020
AT1G67920	AT1G50730	AT1G67810	AT1G50360	AT1G64280	AT1G51620	AT1G60830	AT1G50030	AT1G56520	AT1G50360		AT1G23052
AT1G67940	AT1G50740	AT1G67850	AT1G50410	AT1G64370	AT1G51640	AT1G60870	AT1G50120	AT1G56540	AT1G50380		AT1G23060
AT1G67950	AT1G50940	AT1G67910	AT1G50430	AT1G64385	AT1G51645	AT1G60940	AT1G50180	AT1G56550	AT1G50400		AT1G23080
AT1G67960	AT1G50950	AT1G67970	AT1G50440	AT1G64405	AT1G51650	AT1G60960	AT1G50360	AT1G56590	AT1G50410		AT1G23090
AT1G67970	AT1G51140	AT1G68000	AT1G50480	AT1G64460	AT1G51660	AT1G60989	AT1G50380	AT1G56600	AT1G50430		AT1G23100
AT1G67980	AT1G51160	AT1G68100	AT1G50500	AT1G64470	AT1G51710	AT1G61150	AT1G50400	AT1G56610	AT1G50440		AT1G23120
AT1G68000	AT1G51170	AT1G68190	AT1G50510	AT1G64520	AT1G51760	AT1G61180	AT1G50410	AT1G56700	AT1G50480		AT1G23130
AT1G68100	AT1G51270	AT1G68300	AT1G50520	AT1G64610	AT1G51790	AT1G61250	AT1G50430	AT1G57560	AT1G50500		AT1G23140
AT1G68190	AT1G51390	AT1G68585	AT1G50560	AT1G64710	AT1G51800	AT1G61255	AT1G50440	AT1G57600	AT1G50510		AT1G23170
AT1G68300	AT1G51540	AT1G68600	AT1G50700	AT1G64750	AT1G51820	AT1G61260	AT1G50480	AT1G57620	AT1G50520		AT1G23190
AT1G68330	AT1G51550	AT1G68650	AT1G50730	AT1G64810	AT1G51850	AT1G61275	AT1G50500	AT1G57630	AT1G50700		AT1G23230
AT1G68585	AT1G51590	AT1G68710	AT1G50740	AT1G65040	AT1G51860	AT1G61360	AT1G50510	AT1G57870	AT1G50730		AT1G23260
AT1G68600	AT1G51620	AT1G68800	AT1G50940	AT1G65250	AT1G51890	AT1G61370	AT1G50560	AT1G57943	AT1G50740		AT1G23360
AT1G68620	AT1G51640	AT1G68840	AT1G51160	AT1G65270	AT1G51920	AT1G61380	AT1G50570	AT1G57990	AT1G50830		AT1G23390
AT1G68650	AT1G51645	AT1G68980	AT1G51270	AT1G65360	AT1G51980	AT1G61420	AT1G50700	AT1G58060	AT1G50940		AT1G23440
AT1G68680	AT1G51650	AT1G69020	AT1G51390	AT1G65410	AT1G52200	AT1G61430	AT1G50730	AT1G58110	AT1G51160		AT1G23490
AT1G68710	AT1G51660	AT1G69030	AT1G51590	AT1G65481	AT1G52290	AT1G61440	AT1G50740	AT1G58180	AT1G51270		AT1G23510
AT1G68730	AT1G51670	AT1G69270	AT1G51620	AT1G65484	AT1G52320	AT1G61460	AT1G50940	AT1G58190	AT1G51390		AT1G23710
AT1G68765	AT1G51710	AT1G69340	AT1G51640	AT1G65486	AT1G52360	AT1G61480	AT1G51160	AT1G58220	AT1G51510		AT1G23730
AT1G68820	AT1G51740	AT1G69390	AT1G51645	AT1G65500	AT1G52370	AT1G61490	AT1G51270	AT1G58225	AT1G51540		AT1G23780
AT1G68840	AT1G51760	AT1G69450	AT1G51650	AT1G65520	AT1G52420	AT1G61560	AT1G51390	AT1G58230	AT1G51590		AT1G23830
AT1G69030	AT1G51790	AT1G69460	AT1G51660	AT1G65540	AT1G52520	AT1G61610	AT1G51510	AT1G58300	AT1G51620		AT1G23840
AT1G69270	AT1G51800	AT1G69510	AT1G51710	AT1G65690	AT1G52570	AT1G61620	AT1G51540	AT1G58360	AT1G51640		AT1G23850
AT1G69360	AT1G51820	AT1G69520	AT1G51760	AT1G65720	AT1G52600	AT1G61670	AT1G51590	AT1G58420	AT1G51645		AT1G23870
AT1G69370	AT1G51850	AT1G69530	AT1G51790	AT1G65790	AT1G52620	AT1G61690	AT1G51620	AT1G58561	AT1G51650		AT1G23900
AT1G69390	AT1G51860	AT1G69550	AT1G51800	AT1G65800	AT1G52720	AT1G61790	AT1G51645	AT1G58590	AT1G51660		AT1G23935
AT1G69410	AT1G51890	AT1G69720	AT1G51820	AT1G65820	AT1G52780	AT1G61800	AT1G51660	AT1G58602	AT1G51710		AT1G23940
AT1G69450	AT1G51913	AT1G69730	AT1G51850	AT1G65845	AT1G52800	AT1G61810	AT1G51710	AT1G59520	AT1G51740		AT1G23950
AT1G69460	AT1G51920	AT1G69740	AT1G51860	AT1G65850	AT1G52880	AT1G61850	AT1G51740	AT1G59560	AT1G51760		AT1G23960
AT1G69490	AT1G51980	AT1G69750	AT1G51890	AT1G65970	AT1G52890	AT1G62040	AT1G51760	AT1G59580	AT1G51790		AT1G24050
AT1G69510	AT1G52160	AT1G69780	AT1G51920	AT1G65980	AT1G53030	AT1G62200	AT1G51790	AT1G59590	AT1G51800		AT1G24090
AT1G69520	AT1G52200	AT1G69840	AT1G51980	AT1G66240	AT1G53110	AT1G62260	AT1G51800	AT1G59600	AT1G51820		AT1G24095
AT1G69530	AT1G52260	AT1G69850	AT1G52087	AT1G66410	AT1G53165	AT1G62300	AT1G51820	AT1G59610	AT1G51850		AT1G24100
AT1G69550	AT1G52315	AT1G69890	AT1G52200	AT1G66590	AT1G53170	AT1G62305	AT1G51850	AT1G59620	AT1G51860		AT1G24140
AT1G69620	AT1G52320	AT1G69910	AT1G52260	AT1G66600	AT1G53180	AT1G62310	AT1G51860	AT1G59650	AT1G51890		AT1G24145
AT1G69720	AT1G52360	AT1G69920	AT1G52290	AT1G66670	AT1G53280	AT1G62370	AT1G51890	AT1G59710	AT1G51920		AT1G24147
AT1G69730	AT1G52370	AT1G69980	AT1G52320	AT1G66680	AT1G53310	AT1G62422	AT1G51920	AT1G59820	AT1G51980		AT1G24148
AT1G69740	AT1G52420	AT1G70100	AT1G52360	AT1G66700	AT1G53320	AT1G62430	AT1G51980	AT1G59865	AT1G52160		AT1G24150
AT1G69780	AT1G52600	AT1G70160	AT1G52370	AT1G66780	AT1G53350	AT1G62600	AT1G52200	AT1G59870	AT1G52200		AT1G24180
AT1G69830	AT1G52620	AT1G70290	AT1G52420	AT1G66830	AT1G53390	AT1G62730	AT1G52260	AT1G59900	AT1G52260		AT1G24190
AT1G69850	AT1G52720	AT1G70330	AT1G52600	AT1G66880	AT1G53400	AT1G62790	AT1G52290	AT1G59950	AT1G52290		AT1G24210
AT1G69890	AT1G52780	AT1G70420	AT1G52620	AT1G66900	AT1G53430	AT1G62810	AT1G52320	AT1G59960	AT1G52315		AT1G24240
AT1G69900	AT1G52800	AT1G70490	AT1G52710	AT1G66910	AT1G53440	AT1G62840	AT1G52360	AT1G60140	AT1G52320		AT1G24300
AT1G69910	AT1G52890	AT1G70518	AT1G52720	AT1G66920	AT1G53540	AT1G63020	AT1G52370	AT1G60220	AT1G52360		AT1G24350
AT1G69920	AT1G53100	AT1G70520	AT1G52780	AT1G66940	AT1G53560	AT1G63110	AT1G52380	AT1G60420	AT1G52370		AT1G24360
AT1G69930	AT1G53110	AT1G70530	AT1G52800	AT1G66960	AT1G53580	AT1G63245	AT1G52420	AT1G60440	AT1G52380		AT1G24400
AT1G69960	AT1G53165	AT1G70690	AT1G52850	AT1G66970	AT1G53590	AT1G63350	AT1G52500	AT1G60490	AT1G52420		AT1G24440
AT1G69980	AT1G53170	AT1G70740	AT1G53030	AT1G66980	AT1G53700	AT1G63370	AT1G52540	AT1G60730	AT1G52500		AT1G24450
AT1G70160	AT1G53180	AT1G70810	AT1G53110	AT1G67000	AT1G53710	AT1G63460	AT1G52570	AT1G60780	AT1G52570		AT1G24460
AT1G70260	AT1G53280	AT1G70820	AT1G53165	AT1G67060	AT1G53720	AT1G63500	AT1G52600	AT1G60989	AT1G52600		AT1G24470
AT1G70290	AT1G53310	AT1G71030	AT1G53170	AT1G67190	AT1G53750	AT1G63670	AT1G52620	AT1G61140	AT1G52620		AT1G24510
AT1G70300	AT1G53320	AT1G71190	AT1G53280	AT1G67250	AT1G53760	AT1G63720	AT1G52780	AT1G61150	AT1G52710		AT1G24530
AT1G70330	AT1G53350	AT1G71220	AT1G53310	AT1G67310	AT1G53770	AT1G63730	AT1G52800	AT1G61170	AT1G52780		AT1G24560
AT1G70350	AT1G53390	AT1G71260	AT1G53320	AT1G67410	AT1G53830	AT1G63740	AT1G52810	AT1G61180	AT1G52800		AT1G24575
AT1G70420	AT1G53400	AT1G71270	AT1G53340	AT1G67490	AT1G53850	AT1G63770	AT1G52825	AT1G61250	AT1G53030		AT1G24625
AT1G70490	AT1G53440	AT1G71390	AT1G53350	AT1G67500	AT1G53910	AT1G63800	AT1G52880	AT1G61255	AT1G53100		AT1G24706
AT1G70518	AT1G53540	AT1G71400	AT1G53390	AT1G67510	AT1G53980	AT1G63830	AT1G53030	AT1G61260	AT1G53110		AT1G25054
AT1G70520	AT1G53560	AT1G71440	AT1G53430	AT1G67520	AT1G53990	AT1G63860	AT1G53100	AT1G61350	AT1G53165		AT1G25220
AT1G70530	AT1G53580	AT1G71520	AT1G53440	AT1G67550	AT1G54000	AT1G63880	AT1G53110	AT1G61360	AT1G53280		AT1G25230
AT1G70690	AT1G53590	AT1G71696	AT1G53480	AT1G67570	AT1G54010	AT1G63900	AT1G53160	AT1G61370	AT1G53310		AT1G25275
AT1G70740	AT1G53625	AT1G71697	AT1G53540	AT1G67785	AT1G54030	AT1G64170	AT1G53165	AT1G61380	AT1G53320		AT1G25280
AT1G70770	AT1G53700	AT1G71780	AT1G53560	AT1G67800	AT1G54090	AT1G64280	AT1G53180	AT1G61420	AT1G53350		AT1G25320
AT1G70800	AT1G53710	AT1G71800	AT1G53590	AT1G67810	AT1G54100	AT1G64300	AT1G53200	AT1G61430	AT1G53390		AT1G25370
AT1G70810	AT1G53750	AT1G71865	AT1G53625	AT1G67850	AT1G54115	AT1G64370	AT1G53280	AT1G61460	AT1G53400		AT1G25375
AT1G70820	AT1G53760	AT1G71970	AT1G53700	AT1G67920	AT1G54130	AT1G64385	AT1G53310	AT1G61480	AT1G53430		AT1G25380
AT1G70940	AT1G53770	AT1G71990	AT1G53710	AT1G67940	AT1G54150	AT1G64400	AT1G53320	AT1G61490	AT1G53440		AT1G25390
AT1G71030	AT1G53830	AT1G72010	AT1G53750	AT1G67960	AT1G54170	AT1G64405	AT1G53330	AT1G61550	AT1G53570		AT1G25400
AT1G71190	AT1G53850	AT1G72020	AT1G53760	AT1G67970	AT1G54210	AT1G64520	AT1G53350	AT1G61560	AT1G53590		AT1G25460
AT1G71220	AT1G53910	AT1G72060	AT1G53770	AT1G67980	AT1G54250	AT1G64610	AT1G53390	AT1G61570	AT1G53650		AT1G25480
AT1G71260	AT1G53920	AT1G72160	AT1G53830	AT1G68000	AT1G54320	AT1G64710	AT1G53400	AT1G61580	AT1G53710		AT1G25500
AT1G71270	AT1G53990	AT1G72175	AT1G53850	AT1G68100	AT1G54340	AT1G64750	AT1G53430	AT1G61620	AT1G53720		AT1G25520
AT1G71310	AT1G54000	AT1G72280	AT1G53910	AT1G68300	AT1G54360	AT1G64810	AT1G53440	AT1G61640	AT1G53750		AT1G25530
AT1G71400	AT1G54010	AT1G72330	AT1G53920	AT1G68585	AT1G54440	AT1G64850	AT1G53560	AT1G61670	AT1G53760		AT1G25540
AT1G71410	AT1G54030	AT1G72420	AT1G53980	AT1G68600	AT1G54460	AT1G64890	AT1G53570	AT1G61690	AT1G53770		AT1G25550
AT1G71440	AT1G54090	AT1G72630	AT1G53990	AT1G68620	AT1G54490	AT1G65040	AT1G53590	AT1G61770	AT1G53830		AT1G25560
AT1G71697	AT1G54100	AT1G72680	AT1G54000	AT1G68650	AT1G54520	AT1G65250	AT1G53625	AT1G61780	AT1G53850		AT1G25580
AT1G71800	AT1G54115	AT1G72710	AT1G54010	AT1G68690	AT1G54570	AT1G65270	AT1G53650	AT1G61790	AT1G53910		AT1G25682
AT1G71865	AT1G54130	AT1G72855	AT1G54030	AT1G68710	AT1G54575	AT1G65360	AT1G53700	AT1G61800	AT1G53920		AT1G26090
AT1G71890	AT1G54150	AT1G72900	AT1G54090	AT1G68765	AT1G54660	AT1G65390	AT1G53710	AT1G61850	AT1G53980		AT1G26110
AT1G71950	AT1G54170	AT1G72910	AT1G54100	AT1G68820	AT1G54920	AT1G65481	AT1G53720	AT1G62020	AT1G53990		AT1G26120
AT1G71970	AT1G54210	AT1G72930	AT1G54115	AT1G69020	AT1G54926	AT1G65484	AT1G53750	AT1G62040	AT1G54010		AT1G26130
AT1G72020	AT1G54320	AT1G72950	AT1G54130	AT1G69030	AT1G54990	AT1G65486	AT1G53760	AT1G62200	AT1G54030		AT1G26160
AT1G72060	AT1G54340	AT1G73030	AT1G54150	AT1G69270	AT1G55020	AT1G65500	AT1G53770	AT1G62300	AT1G54090		AT1G26190
AT1G72160	AT1G54360	AT1G73200	AT1G54170	AT1G69360	AT1G55050	AT1G65520	AT1G53830	AT1G62305	AT1G54100		AT1G26200
AT1G72175	AT1G54390	AT1G73250	AT1G54320	AT1G69390	AT1G55080	AT1G65540	AT1G53850	AT1G62310	AT1G54115		AT1G26260
AT1G72280	AT1G54410	AT1G73380	AT1G54340	AT1G69410	AT1G55090	AT1G65580	AT1G53910	AT1G62422	AT1G54150		AT1G26270
AT1G72540	AT1G54440	AT1G73500	AT1G54360	AT1G69450	AT1G55120	AT1G65610	AT1G53920	AT1G62600	AT1G54170		AT1G26300
AT1G72630	AT1G54490	AT1G73655	AT1G54370	AT1G69460	AT1G55170	AT1G65690	AT1G53980	AT1G62730	AT1G54210		AT1G26340
AT1G72645	AT1G54575	AT1G73805	AT1G54440	AT1G69520	AT1G55230	AT1G65720	AT1G53990	AT1G62790	AT1G54250		AT1G26380
AT1G72680	AT1G54580	AT1G73810	AT1G54460	AT1G69530	AT1G55250	AT1G65790	AT1G54000	AT1G62810	AT1G54320		AT1G26390
AT1G72710	AT1G54630	AT1G73820	AT1G54490	AT1G69550	AT1G55310	AT1G65800	AT1G54010	AT1G62840	AT1G54340		AT1G26400
AT1G72830	AT1G54680	AT1G73830	AT1G54510	AT1G69720	AT1G55325	AT1G65820	AT1G54030	AT1G62880	AT1G54360		AT1G26410
AT1G72900	AT1G54710	AT1G73980	AT1G54575	AT1G69730	AT1G55450	AT1G65845	AT1G54090	AT1G63110	AT1G54370		AT1G26420
AT1G72910	AT1G54960	AT1G74080	AT1G54740	AT1G69740	AT1G55475	AT1G65850	AT1G54100	AT1G63350	AT1G54410		AT1G26440
AT1G72920	AT1G54990	AT1G74088	AT1G54960	AT1G69780	AT1G55610	AT1G65970	AT1G54115	AT1G63460	AT1G54440		AT1G26460
AT1G72930	AT1G55000	AT1G74170	AT1G54990	AT1G69840	AT1G55680	AT1G65980	AT1G54130	AT1G63500	AT1G54490		AT1G26550
AT1G72940	AT1G55020	AT1G74210	AT1G55020	AT1G69850	AT1G55730	AT1G66060	AT1G54150	AT1G63720	AT1G54575		AT1G26558
AT1G73030	AT1G55080	AT1G74240	AT1G55050	AT1G69890	AT1G55790	AT1G66160	AT1G54170	AT1G63730	AT1G54610		AT1G26580
AT1G73200	AT1G55230	AT1G74270	AT1G55080	AT1G69900	AT1G55830	AT1G66240	AT1G54210	AT1G63740	AT1G54630		AT1G26620
AT1G73210	AT1G55250	AT1G74280	AT1G55090	AT1G69920	AT1G55840	AT1G66410	AT1G54320	AT1G63800	AT1G54923		AT1G26630
AT1G73250	AT1G55265	AT1G74340	AT1G55130	AT1G69930	AT1G55850	AT1G66590	AT1G54340	AT1G63830	AT1G54926		AT1G26640
AT1G73380	AT1G55310	AT1G74360	AT1G55250	AT1G69960	AT1G55860	AT1G66600	AT1G54360	AT1G63860	AT1G54960		AT1G26670
AT1G73500	AT1G55325	AT1G74440	AT1G55265	AT1G69980	AT1G55900	AT1G66670	AT1G54410	AT1G63880	AT1G54990		AT1G26690
AT1G73655	AT1G55365	AT1G74590	AT1G55310	AT1G70140	AT1G55910	AT1G66680	AT1G54440	AT1G64065	AT1G55020		AT1G26730
AT1G73750	AT1G55450	AT1G74600	AT1G55325	AT1G70160	AT1G56010	AT1G66700	AT1G54490	AT1G64170	AT1G55050		AT1G26740
AT1G73790	AT1G55475	AT1G74670	AT1G55450	AT1G70170	AT1G56060	AT1G66780	AT1G54520	AT1G64280	AT1G55080		AT1G26750
AT1G73805	AT1G55610	AT1G74680	AT1G55475	AT1G70330	AT1G56070	AT1G66830	AT1G54575	AT1G64350	AT1G55090		AT1G26800
AT1G73810	AT1G55680	AT1G74710	AT1G55610	AT1G70420	AT1G56090	AT1G66880	AT1G54630	AT1G64385	AT1G55110		AT1G26820
AT1G73830	AT1G55730	AT1G74910	AT1G55730	AT1G70490	AT1G56120	AT1G66890	AT1G54660	AT1G64400	AT1G55120		AT1G26830
AT1G73920	AT1G55760	AT1G75130	AT1G55790	AT1G70518	AT1G56140	AT1G66910	AT1G54920	AT1G64405	AT1G55210		AT1G26840
AT1G73980	AT1G55790	AT1G75140	AT1G55830	AT1G70520	AT1G56145	AT1G66920	AT1G54990	AT1G64460	AT1G55250		AT1G26900
AT1G74080	AT1G55830	AT1G75180	AT1G55840	AT1G70530	AT1G56190	AT1G66940	AT1G55050	AT1G64470	AT1G55310		AT1G26930
AT1G74088	AT1G55840	AT1G75250	AT1G55850	AT1G70581	AT1G56220	AT1G66970	AT1G55080	AT1G64520	AT1G55450		AT1G26940
AT1G74210	AT1G55850	AT1G75380	AT1G55860	AT1G70690	AT1G56240	AT1G66980	AT1G55090	AT1G64563	AT1G55475		AT1G27000
AT1G74270	AT1G55860	AT1G75440	AT1G55910	AT1G70740	AT1G56250	AT1G67000	AT1G55120	AT1G64570	AT1G55530		AT1G27020
AT1G74280	AT1G55880	AT1G75490	AT1G56010	AT1G70770	AT1G56330	AT1G67060	AT1G55250	AT1G64610	AT1G55610		AT1G27060
AT1G74360	AT1G56010	AT1G75500	AT1G56060	AT1G70810	AT1G56340	AT1G67250	AT1G55310	AT1G64650	AT1G55730		AT1G27090
AT1G74370	AT1G56060	AT1G75510	AT1G56070	AT1G70820	AT1G56440	AT1G67265	AT1G55420	AT1G64710	AT1G55750		AT1G27100
AT1G74440	AT1G56090	AT1G75540	AT1G56120	AT1G70980	AT1G56450	AT1G67310	AT1G55430	AT1G64810	AT1G55790		AT1G27110
AT1G74590	AT1G56120	AT1G75830	AT1G56130	AT1G71040	AT1G56460	AT1G67410	AT1G55450	AT1G64890	AT1G55810		AT1G27130
AT1G74600	AT1G56140	AT1G75880	AT1G56140	AT1G71190	AT1G56470	AT1G67490	AT1G55475	AT1G64990	AT1G55830		AT1G27150
AT1G74650	AT1G56145	AT1G75950	AT1G56145	AT1G71220	AT1G56520	AT1G67500	AT1G55610	AT1G65000	AT1G55840		AT1G27170
AT1G74680	AT1G56150	AT1G75960	AT1G56190	AT1G71230	AT1G56550	AT1G67510	AT1G55730	AT1G65040	AT1G55850		AT1G27180
AT1G74710	AT1G56220	AT1G75990	AT1G56220	AT1G71260	AT1G56590	AT1G67520	AT1G55790	AT1G65120	AT1G55860		AT1G27210
AT1G74910	AT1G56240	AT1G76040	AT1G56240	AT1G71270	AT1G56650	AT1G67550	AT1G55830	AT1G65250	AT1G55880		AT1G27290
AT1G74930	AT1G56250	AT1G76100	AT1G56250	AT1G71390	AT1G56700	AT1G67785	AT1G55840	AT1G65270	AT1G55910		AT1G27300
AT1G74940	AT1G56330	AT1G76150	AT1G56330	AT1G71400	AT1G56710	AT1G67800	AT1G55850	AT1G65360	AT1G56010		AT1G27310
AT1G75130	AT1G56340	AT1G76200	AT1G56340	AT1G71410	AT1G57560	AT1G67810	AT1G55860	AT1G65481	AT1G56060		AT1G27320
AT1G75140	AT1G56423	AT1G76400	AT1G56423	AT1G71520	AT1G57600	AT1G67850	AT1G55880	AT1G65483	AT1G56110		AT1G27330
AT1G75220	AT1G56440	AT1G76410	AT1G56440	AT1G71697	AT1G57620	AT1G67860	AT1G55910	AT1G65484	AT1G56120		AT1G27350
AT1G75380	AT1G56450	AT1G76510	AT1G56450	AT1G71800	AT1G57630	AT1G67920	AT1G56010	AT1G65486	AT1G56140		AT1G27385
AT1G75440	AT1G56460	AT1G76590	AT1G56460	AT1G71865	AT1G57650	AT1G67940	AT1G56060	AT1G65500	AT1G56145		AT1G27430
AT1G75460	AT1G56520	AT1G76640	AT1G56520	AT1G71970	AT1G57990	AT1G67960	AT1G56120	AT1G65520	AT1G56190		AT1G27435
AT1G75500	AT1G56550	AT1G76680	AT1G56550	AT1G72010	AT1G58025	AT1G67970	AT1G56130	AT1G65540	AT1G56220		AT1G27450
AT1G75510	AT1G56610	AT1G76700	AT1G56590	AT1G72020	AT1G58030	AT1G67980	AT1G56140	AT1G65720	AT1G56280		AT1G27530
AT1G75540	AT1G56650	AT1G76920	AT1G56610	AT1G72060	AT1G58060	AT1G68000	AT1G56145	AT1G65790	AT1G56330		AT1G27595
AT1G75760	AT1G56700	AT1G76940	AT1G56700	AT1G72175	AT1G58110	AT1G68100	AT1G56150	AT1G65800	AT1G56340		AT1G27600
AT1G75830	AT1G56710	AT1G76960	AT1G56710	AT1G72280	AT1G58180	AT1G68110	AT1G56190	AT1G65820	AT1G56440		AT1G27630
AT1G75950	AT1G57560	AT1G76970	AT1G57560	AT1G72330	AT1G58190	AT1G68300	AT1G56220	AT1G65845	AT1G56450		AT1G27650
AT1G75960	AT1G57590	AT1G77000	AT1G57600	AT1G72540	AT1G58200	AT1G68330	AT1G56240	AT1G65850	AT1G56460		AT1G27720
AT1G75990	AT1G57600	AT1G77130	AT1G57620	AT1G72680	AT1G58225	AT1G68585	AT1G56280	AT1G65970	AT1G56520		AT1G27730
AT1G76040	AT1G57620	AT1G77210	AT1G57630	AT1G72710	AT1G58230	AT1G68600	AT1G56330	AT1G65980	AT1G56540		AT1G27750
AT1G76100	AT1G57630	AT1G77220	AT1G57650	AT1G72830	AT1G58250	AT1G68620	AT1G56340	AT1G66090	AT1G56550		AT1G27752
AT1G76150	AT1G57650	AT1G77350	AT1G57870	AT1G72855	AT1G58300	AT1G68650	AT1G56423	AT1G66240	AT1G56590		AT1G27770
AT1G76185	AT1G57870	AT1G77370	AT1G57990	AT1G72900	AT1G58340	AT1G68690	AT1G56440	AT1G66410	AT1G56600		AT1G27840
AT1G76200	AT1G57990	AT1G77420	AT1G58025	AT1G72930	AT1G58561	AT1G68710	AT1G56450	AT1G66590	AT1G56610		AT1G27930
AT1G76270	AT1G58025	AT1G77440	AT1G58030	AT1G72950	AT1G59520	AT1G68765	AT1G56460	AT1G66600	AT1G57560		AT1G27960
AT1G76400	AT1G58030	AT1G77460	AT1G58060	AT1G73030	AT1G59580	AT1G68820	AT1G56510	AT1G66670	AT1G57600		AT1G27970
AT1G76520	AT1G58060	AT1G77480	AT1G58110	AT1G73200	AT1G59590	AT1G68980	AT1G56520	AT1G66680	AT1G57620		AT1G27980
AT1G76600	AT1G58110	AT1G77500	AT1G58180	AT1G73250	AT1G59610	AT1G69270	AT1G56540	AT1G66700	AT1G57630		AT1G28050
AT1G76640	AT1G58180	AT1G77510	AT1G58190	AT1G73380	AT1G59620	AT1G69340	AT1G56550	AT1G66880	AT1G57870		AT1G28070
AT1G76660	AT1G58190	AT1G77540	AT1G58200	AT1G73500	AT1G59650	AT1G69350	AT1G56600	AT1G66890	AT1G57990		AT1G28110
AT1G76680	AT1G58200	AT1G77660	AT1G58225	AT1G73530	AT1G59710	AT1G69390	AT1G56610	AT1G66910	AT1G58030		AT1G28120
AT1G76700	AT1G58225	AT1G77710	AT1G58230	AT1G73655	AT1G59820	AT1G69410	AT1G56700	AT1G66920	AT1G58060		AT1G28140
AT1G76730	AT1G58230	AT1G77750	AT1G58250	AT1G73805	AT1G59870	AT1G69450	AT1G57560	AT1G66940	AT1G58110		AT1G28150
AT1G76790	AT1G58250	AT1G77765	AT1G58300	AT1G73810	AT1G59890	AT1G69460	AT1G57600	AT1G66960	AT1G58180		AT1G28190
AT1G76930	AT1G58420	AT1G77810	AT1G58340	AT1G73980	AT1G59950	AT1G69520	AT1G57620	AT1G66970	AT1G58190		AT1G28200
AT1G76940	AT1G58561	AT1G77960	AT1G58561	AT1G74080	AT1G59960	AT1G69550	AT1G57630	AT1G66980	AT1G58200		AT1G28210
AT1G76955	AT1G58590	AT1G78130	AT1G59520	AT1G74088	AT1G60070	AT1G69640	AT1G57650	AT1G67000	AT1G58225		AT1G28230
AT1G76960	AT1G58602	AT1G78190	AT1G59560	AT1G74170	AT1G60140	AT1G69720	AT1G57700	AT1G67060	AT1G58230		AT1G28240
AT1G76970	AT1G59520	AT1G78270	AT1G59580	AT1G74210	AT1G60220	AT1G69740	AT1G57870	AT1G67120	AT1G58250		AT1G28250
AT1G77000	AT1G59580	AT1G78410	AT1G59590	AT1G74270	AT1G60420	AT1G69750	AT1G57990	AT1G67190	AT1G58300		AT1G28260
AT1G77130	AT1G59590	AT1G78420	AT1G59600	AT1G74280	AT1G60440	AT1G69810	AT1G58025	AT1G67250	AT1G58340		AT1G28280
AT1G77210	AT1G59610	AT1G78460	AT1G59610	AT1G74300	AT1G60490	AT1G69840	AT1G58030	AT1G67265	AT1G58360		AT1G28320
AT1G77220	AT1G59620	AT1G78550	AT1G59620	AT1G74350	AT1G60730	AT1G69850	AT1G58060	AT1G67310	AT1G58380		AT1G28330
AT1G77350	AT1G59650	AT1G78590	AT1G59650	AT1G74360	AT1G60740	AT1G69890	AT1G58180	AT1G67330	AT1G58420		AT1G28350
AT1G77370	AT1G59710	AT1G78600	AT1G59710	AT1G74440	AT1G60780	AT1G69900	AT1G58190	AT1G67470	AT1G58561		AT1G28370
AT1G77420	AT1G59820	AT1G78620	AT1G59820	AT1G74590	AT1G60830	AT1G69920	AT1G58200	AT1G67490	AT1G59520		AT1G28380
AT1G77440	AT1G59870	AT1G78800	AT1G59870	AT1G74600	AT1G60890	AT1G69960	AT1G58225	AT1G67500	AT1G59580		AT1G28390
AT1G77460	AT1G59950	AT1G78830	AT1G59910	AT1G74650	AT1G60900	AT1G70140	AT1G58230	AT1G67510	AT1G59590		AT1G28420
AT1G77500	AT1G59960	AT1G78850	AT1G59950	AT1G74670	AT1G60940	AT1G70150	AT1G58250	AT1G67520	AT1G59600		AT1G28480
AT1G77510	AT1G60070	AT1G78870	AT1G59960	AT1G74680	AT1G60989	AT1G70160	AT1G58300	AT1G67550	AT1G59610		AT1G28490
AT1G77710	AT1G60140	AT1G78890	AT1G60070	AT1G74710	AT1G60995	AT1G70170	AT1G58350	AT1G67560	AT1G59620		AT1G28510
AT1G77750	AT1G60220	AT1G78895	AT1G60140	AT1G74790	AT1G61030	AT1G70230	AT1G58400	AT1G67650	AT1G59650		AT1G28520
AT1G77760	AT1G60420	AT1G78900	AT1G60220	AT1G74910	AT1G61100	AT1G70300	AT1G58410	AT1G67680	AT1G59710		AT1G28540
AT1G77765	AT1G60440	AT1G78910	AT1G60420	AT1G75130	AT1G61120	AT1G70320	AT1G58420	AT1G67785	AT1G59820		AT1G28570
AT1G77920	AT1G60490	AT1G78920	AT1G60440	AT1G75140	AT1G61140	AT1G70330	AT1G58561	AT1G67800	AT1G59870		AT1G28580
AT1G78130	AT1G60730	AT1G79010	AT1G60490	AT1G75250	AT1G61150	AT1G70420	AT1G58602	AT1G67810	AT1G59900		AT1G28660
AT1G78190	AT1G60740	AT1G79210	AT1G60730	AT1G75380	AT1G61170	AT1G70518	AT1G59520	AT1G67850	AT1G59950		AT1G29040
AT1G78270	AT1G60780	AT1G79380	AT1G60740	AT1G75440	AT1G61180	AT1G70520	AT1G59580	AT1G67860	AT1G59960		AT1G29060
AT1G78300	AT1G60830	AT1G79390	AT1G60780	AT1G75500	AT1G61250	AT1G70530	AT1G59590	AT1G67920	AT1G59990		AT1G29071
AT1G78370	AT1G60890	AT1G79400	AT1G60830	AT1G75510	AT1G61255	AT1G70590	AT1G59600	AT1G67940	AT1G60140		AT1G29150
AT1G78380	AT1G60940	AT1G79670	AT1G60890	AT1G75800	AT1G61260	AT1G70620	AT1G59610	AT1G67960	AT1G60170		AT1G29240
AT1G78410	AT1G60970	AT1G79680	AT1G60940	AT1G75830	AT1G61360	AT1G70690	AT1G59620	AT1G67970	AT1G60220		AT1G29260
AT1G78460	AT1G61000	AT1G79700	AT1G60995	AT1G75850	AT1G61370	AT1G70770	AT1G59650	AT1G67980	AT1G60420		AT1G29280
AT1G78550	AT1G61030	AT1G79710	AT1G61100	AT1G75950	AT1G61380	AT1G70810	AT1G59710	AT1G68000	AT1G60440		AT1G29290
AT1G78600	AT1G61120	AT1G80170	AT1G61120	AT1G75990	AT1G61420	AT1G70820	AT1G59820	AT1G68100	AT1G60490		AT1G29300
AT1G78620	AT1G61140	AT1G80180	AT1G61140	AT1G76040	AT1G61430	AT1G70980	AT1G59870	AT1G68300	AT1G60650		AT1G29310
AT1G78660	AT1G61150	AT1G80190	AT1G61150	AT1G76100	AT1G61460	AT1G71030	AT1G59900	AT1G68330	AT1G60730		AT1G29330
AT1G78830	AT1G61160	AT1G80210	AT1G61170	AT1G76150	AT1G61480	AT1G71040	AT1G59950	AT1G68585	AT1G60780		AT1G29340
AT1G78850	AT1G61180	AT1G80290	AT1G61180	AT1G76185	AT1G61490	AT1G71080	AT1G59960	AT1G68600	AT1G60830		AT1G29350
AT1G78870	AT1G61250	AT1G80310	AT1G61250	AT1G76200	AT1G61550	AT1G71110	AT1G59990	AT1G68650	AT1G60890		AT1G29357
AT1G78890	AT1G61255	AT1G80320	AT1G61260	AT1G76400	AT1G61560	AT1G71140	AT1G60140	AT1G68710	AT1G60940		AT1G29390
AT1G78895	AT1G61260	AT1G80420	AT1G61275	AT1G76410	AT1G61610	AT1G71190	AT1G60170	AT1G68765	AT1G60960		AT1G29395
AT1G78900	AT1G61360	AT1G80460	AT1G61350	AT1G76510	AT1G61640	AT1G71220	AT1G60220	AT1G68820	AT1G61080		AT1G29400
AT1G78920	AT1G61370	AT1G80500	AT1G61360	AT1G76520	AT1G61670	AT1G71390	AT1G60420	AT1G68930	AT1G61100		AT1G29450
AT1G79010	AT1G61380	AT1G80510	AT1G61370	AT1G76580	AT1G61690	AT1G71400	AT1G60440	AT1G69270	AT1G61120		AT1G29460
AT1G79040	AT1G61420	AT1G80570	AT1G61380	AT1G76590	AT1G61770	AT1G71410	AT1G60490	AT1G69350	AT1G61140		AT1G29465
AT1G79210	AT1G61430	AT1G80600	AT1G61390	AT1G76600	AT1G61780	AT1G71460	AT1G60730	AT1G69390	AT1G61150		AT1G29490
AT1G79380	AT1G61480	AT1G80650	AT1G61420	AT1G76640	AT1G61790	AT1G71520	AT1G60740	AT1G69410	AT1G61160		AT1G29550
AT1G79450	AT1G61550	AT1G80770	AT1G61430	AT1G76680	AT1G61800	AT1G71697	AT1G60780	AT1G69450	AT1G61170		AT1G29630
AT1G79530	AT1G61560	AT1G80830	AT1G61480	AT1G76700	AT1G61810	AT1G71800	AT1G60830	AT1G69460	AT1G61180		AT1G29690
AT1G79610	AT1G61610	AT1G80850	AT1G61490	AT1G76860	AT1G61820	AT1G71910	AT1G60890	AT1G69520	AT1G61250		AT1G29715
AT1G79670	AT1G61640	AT1G80860	AT1G61510	AT1G76920	AT1G61850	AT1G71950	AT1G60940	AT1G69530	AT1G61260		AT1G29720
AT1G79680	AT1G61670	AT1G80900	AT1G61550	AT1G76930	AT1G62020	AT1G71970	AT1G60995	AT1G69550	AT1G61275		AT1G29750
AT1G79940	AT1G61690	AT1G80920	AT1G61560	AT1G76940	AT1G62200	AT1G71980	AT1G61040	AT1G69640	AT1G61350		AT1G29800
AT1G79990	AT1G61770	AT1G80950	AT1G61640	AT1G76960	AT1G62300	AT1G72000	AT1G61100	AT1G69720	AT1G61360		AT1G29850
AT1G80110	AT1G61780	AT1G80960	AT1G61667	AT1G76970	AT1G62305	AT1G72010	AT1G61120	AT1G69730	AT1G61370		AT1G29860
AT1G80290	AT1G61790	AT2G01029	AT1G61670	AT1G76980	AT1G62310	AT1G72020	AT1G61140	AT1G69740	AT1G61380		AT1G29910
AT1G80310	AT1G61800	AT2G01060	AT1G61690	AT1G77130	AT1G62380	AT1G72060	AT1G61150	AT1G69750	AT1G61420		AT1G29920
AT1G80400	AT1G61810	AT2G01130	AT1G61770	AT1G77210	AT1G62422	AT1G72070	AT1G61170	AT1G69840	AT1G61430		AT1G29960
AT1G80420	AT1G61820	AT2G01170	AT1G61780	AT1G77220	AT1G62570	AT1G72120	AT1G61180	AT1G69850	AT1G61460		AT1G29970
AT1G80440	AT1G61850	AT2G01180	AT1G61790	AT1G77350	AT1G62600	AT1G72160	AT1G61250	AT1G69890	AT1G61480		AT1G29990
AT1G80460	AT1G62020	AT2G01340	AT1G61800	AT1G77360	AT1G62660	AT1G72175	AT1G61260	AT1G69900	AT1G61490		AT1G30000
AT1G80510	AT1G62040	AT2G01440	AT1G61810	AT1G77370	AT1G62730	AT1G72180	AT1G61310	AT1G69920	AT1G61550		AT1G30010
AT1G80600	AT1G62130	AT2G01450	AT1G61820	AT1G77380	AT1G62790	AT1G72280	AT1G61340	AT1G69960	AT1G61560		AT1G30040
AT1G80650	AT1G62200	AT2G01490	AT1G61850	AT1G77420	AT1G62810	AT1G72330	AT1G61360	AT1G69980	AT1G61570		AT1G30090
AT1G80720	AT1G62300	AT2G01540	AT1G62020	AT1G77440	AT1G62820	AT1G72416	AT1G61370	AT1G70140	AT1G61580		AT1G30100
AT1G80830	AT1G62305	AT2G01650	AT1G62200	AT1G77460	AT1G62840	AT1G72540	AT1G61380	AT1G70150	AT1G61640		AT1G30135
AT1G80840	AT1G62330	AT2G01720	AT1G62300	AT1G77500	AT1G63010	AT1G72630	AT1G61420	AT1G70160	AT1G61667		AT1G30200
AT1G80850	AT1G62370	AT2G01760	AT1G62305	AT1G77510	AT1G63245	AT1G72645	AT1G61430	AT1G70320	AT1G61670		AT1G30210
AT1G80860	AT1G62380	AT2G01860	AT1G62370	AT1G77660	AT1G63350	AT1G72680	AT1G61460	AT1G70330	AT1G61690		AT1G30220
AT1G80900	AT1G62420	AT2G01930	AT1G62380	AT1G77710	AT1G63440	AT1G72710	AT1G61480	AT1G70420	AT1G61730		AT1G30270
AT1G80920	AT1G62430	AT2G02010	AT1G62570	AT1G77750	AT1G63460	AT1G72830	AT1G61490	AT1G70490	AT1G61770		AT1G30300
AT1G80950	AT1G62570	AT2G02040	AT1G62600	AT1G77810	AT1G63500	AT1G72852	AT1G61550	AT1G70518	AT1G61790		AT1G30370
AT1G80960	AT1G62580	AT2G02050	AT1G62660	AT1G77890	AT1G63720	AT1G72855	AT1G61560	AT1G70520	AT1G61800		AT1G30380
AT2G01130	AT1G62600	AT2G02130	AT1G62730	AT1G78130	AT1G63730	AT1G72860	AT1G61610	AT1G70530	AT1G61810		AT1G30390
AT2G01140	AT1G62660	AT2G02220	AT1G62790	AT1G78190	AT1G63740	AT1G72870	AT1G61640	AT1G70581	AT1G61820		AT1G30400
AT2G01180	AT1G62730	AT2G02350	AT1G62810	AT1G78210	AT1G63750	AT1G72900	AT1G61670	AT1G70590	AT1G61850		AT1G30410
AT2G01340	AT1G62740	AT2G02360	AT1G62840	AT1G78270	AT1G63770	AT1G72920	AT1G61690	AT1G70620	AT1G62020		AT1G30420
AT2G01420	AT1G62790	AT2G02370	AT1G63010	AT1G78280	AT1G63800	AT1G72940	AT1G61730	AT1G70690	AT1G62200		AT1G30450
AT2G01450	AT1G62810	AT2G02390	AT1G63180	AT1G78310	AT1G63840	AT1G72950	AT1G61770	AT1G70770	AT1G62260		AT1G30460
AT2G01460	AT1G62820	AT2G02400	AT1G63220	AT1G78410	AT1G63860	AT1G72990	AT1G61790	AT1G70810	AT1G62300		AT1G30475
AT2G01490	AT1G62840	AT2G02410	AT1G63245	AT1G78420	AT1G63880	AT1G73030	AT1G61800	AT1G70820	AT1G62305		AT1G30510
AT2G01540	AT1G62880	AT2G02450	AT1G63295	AT1G78460	AT1G64065	AT1G73200	AT1G61810	AT1G70980	AT1G62422		AT1G30540
AT2G01650	AT1G63000	AT2G02510	AT1G63350	AT1G78550	AT1G64090	AT1G73250	AT1G61850	AT1G71030	AT1G62580		AT1G30550
AT2G01720	AT1G63010	AT2G02590	AT1G63440	AT1G78600	AT1G64170	AT1G73380	AT1G62020	AT1G71040	AT1G62600		AT1G30580
AT2G01930	AT1G63090	AT2G02710	AT1G63460	AT1G78620	AT1G64280	AT1G73500	AT1G62200	AT1G71060	AT1G62660		AT1G30610
AT2G02010	AT1G63220	AT2G02760	AT1G63500	AT1G78660	AT1G64350	AT1G73655	AT1G62260	AT1G71080	AT1G62730		AT1G30620
AT2G02040	AT1G63245	AT2G02810	AT1G63720	AT1G78830	AT1G64385	AT1G73680	AT1G62300	AT1G71190	AT1G62740		AT1G30630
AT2G02050	AT1G63350	AT2G02930	AT1G63730	AT1G78850	AT1G64405	AT1G73750	AT1G62305	AT1G71210	AT1G62790		AT1G30640
AT2G02130	AT1G63440	AT2G02960	AT1G63740	AT1G78870	AT1G64460	AT1G73805	AT1G62310	AT1G71220	AT1G62810		AT1G30680
AT2G02220	AT1G63460	AT2G03120	AT1G63770	AT1G78890	AT1G64470	AT1G73810	AT1G62420	AT1G71230	AT1G62840		AT1G30700
AT2G02360	AT1G63500	AT2G03330	AT1G63800	AT1G78895	AT1G64520	AT1G73980	AT1G62422	AT1G71270	AT1G63010		AT1G30720
AT2G02370	AT1G63720	AT2G03430	AT1G63840	AT1G78900	AT1G64570	AT1G74010	AT1G62600	AT1G71390	AT1G63220		AT1G30730
AT2G02390	AT1G63730	AT2G03440	AT1G63860	AT1G78920	AT1G64572	AT1G74080	AT1G62730	AT1G71400	AT1G63245		AT1G30755
AT2G02450	AT1G63740	AT2G03450	AT1G63880	AT1G79010	AT1G64610	AT1G74088	AT1G62790	AT1G71410	AT1G63270		AT1G30757
AT2G02510	AT1G63750	AT2G03510	AT1G64065	AT1G79110	AT1G64660	AT1G74100	AT1G62810	AT1G71440	AT1G63350		AT1G30810
AT2G02540	AT1G63800	AT2G03530	AT1G64170	AT1G79210	AT1G64710	AT1G74170	AT1G62840	AT1G71520	AT1G63380		AT1G30820
AT2G02590	AT1G63840	AT2G03540	AT1G64280	AT1G79340	AT1G64810	AT1G74200	AT1G63010	AT1G71696	AT1G63440		AT1G30825
AT2G02710	AT1G63860	AT2G03590	AT1G64385	AT1G79360	AT1G64890	AT1G74210	AT1G63245	AT1G71697	AT1G63460		AT1G30840
AT2G02760	AT1G63880	AT2G03680	AT1G64405	AT1G79380	AT1G64950	AT1G74280	AT1G63270	AT1G71800	AT1G63490		AT1G30850
AT2G02810	AT1G64065	AT2G03760	AT1G64460	AT1G79450	AT1G64990	AT1G74300	AT1G63350	AT1G71820	AT1G63500		AT1G30880
AT2G02930	AT1G64170	AT2G03870	AT1G64470	AT1G79530	AT1G65020	AT1G74360	AT1G63440	AT1G71865	AT1G63720		AT1G30890
AT2G02960	AT1G64190	AT2G04040	AT1G64520	AT1G79670	AT1G65040	AT1G74410	AT1G63460	AT1G71880	AT1G63730		AT1G30900
AT2G03120	AT1G64200	AT2G04070	AT1G64563	AT1G79680	AT1G65240	AT1G74440	AT1G63500	AT1G71950	AT1G63740		AT1G30910
AT2G03220	AT1G64280	AT2G04080	AT1G64570	AT1G79700	AT1G65250	AT1G74590	AT1G63720	AT1G71980	AT1G63770		AT1G31010
AT2G03330	AT1G64385	AT2G04305	AT1G64610	AT1G79730	AT1G65270	AT1G74600	AT1G63730	AT1G72000	AT1G63830		AT1G31020
AT2G03430	AT1G64405	AT2G04340	AT1G64660	AT1G79830	AT1G65290	AT1G74650	AT1G63740	AT1G72010	AT1G63840		AT1G31130
AT2G03440	AT1G64460	AT2G04400	AT1G64710	AT1G80180	AT1G65360	AT1G74680	AT1G63750	AT1G72020	AT1G63860		AT1G31220
AT2G03510	AT1G64470	AT2G04430	AT1G64890	AT1G80190	AT1G65410	AT1G74710	AT1G63800	AT1G72060	AT1G63880		AT1G31230
AT2G03530	AT1G64520	AT2G04450	AT1G64990	AT1G80210	AT1G65483	AT1G74750	AT1G63830	AT1G72070	AT1G64065		AT1G31280
AT2G03540	AT1G64563	AT2G04495	AT1G65020	AT1G80230	AT1G65484	AT1G74790	AT1G63840	AT1G72280	AT1G64090		AT1G31290
AT2G03590	AT1G64570	AT2G04515	AT1G65040	AT1G80290	AT1G65520	AT1G75130	AT1G63860	AT1G72330	AT1G64170		AT1G31330
AT2G03620	AT1G64572	AT2G04530	AT1G65250	AT1G80420	AT1G65540	AT1G75140	AT1G63880	AT1G72390	AT1G64280		AT1G31340
AT2G03680	AT1G64610	AT2G04550	AT1G65270	AT1G80450	AT1G65580	AT1G75166	AT1G64065	AT1G72416	AT1G64385		AT1G31350
AT2G03760	AT1G64660	AT2G04620	AT1G65290	AT1G80460	AT1G65610	AT1G75220	AT1G64170	AT1G72420	AT1G64400		AT1G31460
AT2G03870	AT1G64710	AT2G04650	AT1G65360	AT1G80510	AT1G65690	AT1G75250	AT1G64280	AT1G72540	AT1G64405		AT1G31480
AT2G03980	AT1G64750	AT2G04690	AT1G65370	AT1G80570	AT1G65720	AT1G75380	AT1G64300	AT1G72560	AT1G64460		AT1G31540
AT2G04040	AT1G64810	AT2G04852	AT1G65440	AT1G80650	AT1G65790	AT1G75510	AT1G64350	AT1G72645	AT1G64470		AT1G31550
AT2G04070	AT1G64890	AT2G04860	AT1G65481	AT1G80820	AT1G65800	AT1G75540	AT1G64360	AT1G72680	AT1G64520		AT1G31570
AT2G04080	AT1G64990	AT2G04890	AT1G65483	AT1G80830	AT1G65820	AT1G75580	AT1G64370	AT1G72710	AT1G64570		AT1G31580
AT2G04110	AT1G65000	AT2G04900	AT1G65484	AT1G80850	AT1G65970	AT1G75630	AT1G64385	AT1G72830	AT1G64610		AT1G31730
AT2G04305	AT1G65020	AT2G05160	AT1G65486	AT1G80860	AT1G65980	AT1G75800	AT1G64405	AT1G72855	AT1G64660		AT1G31780
AT2G04400	AT1G65040	AT2G05518	AT1G65520	AT1G80890	AT1G66090	AT1G75830	AT1G64460	AT1G72860	AT1G64710		AT1G31820
AT2G04430	AT1G65240	AT2G05840	AT1G65540	AT1G80920	AT1G66160	AT1G75850	AT1G64470	AT1G72870	AT1G64750		AT1G31835
AT2G04450	AT1G65250	AT2G06025	AT1G65580	AT1G80960	AT1G66240	AT1G75950	AT1G64520	AT1G72900	AT1G64810		AT1G31870
AT2G04495	AT1G65270	AT2G07042	AT1G65610	AT2G01029	AT1G66340	AT1G75960	AT1G64563	AT1G72910	AT1G64880		AT1G31880
AT2G04515	AT1G65360	AT2G07050	AT1G65690	AT2G01060	AT1G66390	AT1G76010	AT1G64570	AT1G72930	AT1G64890		AT1G31885
AT2G04530	AT1G65410	AT2G07180	AT1G65720	AT2G01130	AT1G66410	AT1G76040	AT1G64610	AT1G72950	AT1G64950		AT1G31910
AT2G04550	AT1G65481	AT2G07360	AT1G65790	AT2G01140	AT1G66570	AT1G76150	AT1G64710	AT1G73030	AT1G64990		AT1G32120
AT2G04620	AT1G65483	AT2G07695	AT1G65800	AT2G01180	AT1G66580	AT1G76200	AT1G64750	AT1G73200	AT1G65020		AT1G32130
AT2G04650	AT1G65484	AT2G07715	AT1G65820	AT2G01340	AT1G66590	AT1G76520	AT1G64810	AT1G73250	AT1G65040		AT1G32150
AT2G04690	AT1G65486	AT2G10410	AT1G65845	AT2G01350	AT1G66600	AT1G76580	AT1G64890	AT1G73380	AT1G65240		AT1G32170
AT2G04900	AT1G65500	AT2G11140	AT1G65850	AT2G01440	AT1G66670	AT1G76590	AT1G64950	AT1G73500	AT1G65250		AT1G32172
AT2G05070	AT1G65520	AT2G11520	AT1G65970	AT2G01450	AT1G66680	AT1G76680	AT1G64990	AT1G73655	AT1G65270		AT1G32210
AT2G05100	AT1G65540	AT2G12490	AT1G65980	AT2G01460	AT1G66700	AT1G76700	AT1G65020	AT1G73680	AT1G65360		AT1G32230
AT2G05160	AT1G65580	AT2G12550	AT1G66090	AT2G01470	AT1G66725	AT1G76760	AT1G65040	AT1G73805	AT1G65410		AT1G32260
AT2G05210	AT1G65610	AT2G13170	AT1G66160	AT2G01490	AT1G66880	AT1G76850	AT1G65240	AT1G73810	AT1G65481		AT1G32270
AT2G05220	AT1G65690	AT2G13560	AT1G66200	AT2G01540	AT1G66920	AT1G76920	AT1G65250	AT1G73980	AT1G65484		AT1G32330
AT2G05260	AT1G65720	AT2G13650	AT1G66230	AT2G01650	AT1G66960	AT1G76930	AT1G65270	AT1G74080	AT1G65486		AT1G32340
AT2G05518	AT1G65730	AT2G13790	AT1G66240	AT2G01670	AT1G66970	AT1G76940	AT1G65360	AT1G74088	AT1G65500		AT1G32350
AT2G05630	AT1G65790	AT2G13800	AT1G66340	AT2G01720	AT1G66980	AT1G76960	AT1G65410	AT1G74100	AT1G65510		AT1G32360
AT2G05710	AT1G65800	AT2G13810	AT1G66390	AT2G02010	AT1G67000	AT1G76970	AT1G65481	AT1G74170	AT1G65520		AT1G32460
AT2G05765	AT1G65820	AT2G14080	AT1G66410	AT2G02040	AT1G67060	AT1G76980	AT1G65483	AT1G74200	AT1G65540		AT1G32490
AT2G05840	AT1G65845	AT2G14120	AT1G66550	AT2G02050	AT1G67120	AT1G77000	AT1G65484	AT1G74210	AT1G65580		AT1G32530
AT2G06025	AT1G65850	AT2G14560	AT1G66570	AT2G02060	AT1G67140	AT1G77130	AT1G65486	AT1G74230	AT1G65610		AT1G32540
AT2G06520	AT1G65960	AT2G14620	AT1G66580	AT2G02180	AT1G67170	AT1G77210	AT1G65500	AT1G74270	AT1G65690		AT1G32580
AT2G06530	AT1G65970	AT2G14680	AT1G66590	AT2G02220	AT1G67190	AT1G77220	AT1G65510	AT1G74280	AT1G65720		AT1G32630
AT2G07180	AT1G65980	AT2G14720	AT1G66600	AT2G02360	AT1G67250	AT1G77360	AT1G65520	AT1G74300	AT1G65790		AT1G32640
AT2G07727	AT1G66090	AT2G14830	AT1G66670	AT2G02370	AT1G67300	AT1G77370	AT1G65540	AT1G74330	AT1G65800		AT1G32690
AT2G07811	AT1G66160	AT2G14850	AT1G66680	AT2G02390	AT1G67310	AT1G77380	AT1G65580	AT1G74340	AT1G65820		AT1G32700
AT2G11520	AT1G66173	AT2G14878	AT1G66700	AT2G02400	AT1G67360	AT1G77420	AT1G65610	AT1G74360	AT1G65845		AT1G32740
AT2G13560	AT1G66200	AT2G15030	AT1G66725	AT2G02510	AT1G67365	AT1G77440	AT1G65690	AT1G74440	AT1G65970		AT1G32750
AT2G13790	AT1G66240	AT2G15040	AT1G66880	AT2G02560	AT1G67490	AT1G77500	AT1G65720	AT1G74560	AT1G65980		AT1G32790
AT2G13800	AT1G66390	AT2G15042	AT1G66910	AT2G02710	AT1G67500	AT1G77510	AT1G65730	AT1G74590	AT1G66070		AT1G32810
AT2G13810	AT1G66410	AT2G15080	AT1G66920	AT2G02760	AT1G67520	AT1G77540	AT1G65790	AT1G74600	AT1G66090		AT1G32870
AT2G14080	AT1G66480	AT2G15230	AT1G66960	AT2G02810	AT1G67550	AT1G77660	AT1G65800	AT1G74650	AT1G66160		AT1G32920
AT2G14560	AT1G66570	AT2G15240	AT1G66970	AT2G02930	AT1G67560	AT1G77710	AT1G65820	AT1G74670	AT1G66240		AT1G32928
AT2G14610	AT1G66580	AT2G15290	AT1G66980	AT2G02960	AT1G67650	AT1G77810	AT1G65845	AT1G74680	AT1G66340		AT1G32940
AT2G14620	AT1G66590	AT2G15390	AT1G67000	AT2G03120	AT1G67680	AT1G77920	AT1G65850	AT1G74710	AT1G66390		AT1G32950
AT2G14680	AT1G66600	AT2G15480	AT1G67060	AT2G03410	AT1G67800	AT1G78030	AT1G65970	AT1G74790	AT1G66410		AT1G32960
AT2G14720	AT1G66670	AT2G15570	AT1G67105	AT2G03430	AT1G67810	AT1G78130	AT1G65980	AT1G75040	AT1G66570		AT1G33030
AT2G14835	AT1G66680	AT2G15630	AT1G67120	AT2G03450	AT1G67850	AT1G78190	AT1G66040	AT1G75130	AT1G66580		AT1G33050
AT2G14878	AT1G66700	AT2G15830	AT1G67140	AT2G03510	AT1G67860	AT1G78210	AT1G66090	AT1G75140	AT1G66590		AT1G33055
AT2G15040	AT1G66880	AT2G15860	AT1G67190	AT2G03530	AT1G67920	AT1G78240	AT1G66160	AT1G75166	AT1G66600		AT1G33120
AT2G15042	AT1G66920	AT2G15880	AT1G67250	AT2G03540	AT1G67940	AT1G78270	AT1G66170	AT1G75170	AT1G66670		AT1G33140
AT2G15080	AT1G66960	AT2G15890	AT1G67310	AT2G03590	AT1G67960	AT1G78280	AT1G66240	AT1G75190	AT1G66680		AT1G33250
AT2G15230	AT1G66970	AT2G15900	AT1G67325	AT2G03680	AT1G67970	AT1G78310	AT1G66410	AT1G75380	AT1G66700		AT1G33265
AT2G15240	AT1G66980	AT2G15960	AT1G67330	AT2G03690	AT1G67980	AT1G78410	AT1G66550	AT1G75510	AT1G66725		AT1G33270
AT2G15390	AT1G67000	AT2G16060	AT1G67490	AT2G03760	AT1G68000	AT1G78420	AT1G66570	AT1G75590	AT1G66830		AT1G33360
AT2G15480	AT1G67060	AT2G16090	AT1G67500	AT2G03870	AT1G68020	AT1G78460	AT1G66580	AT1G75830	AT1G66880		AT1G33390
AT2G15570	AT1G67080	AT2G16310	AT1G67520	AT2G03980	AT1G68100	AT1G78550	AT1G66590	AT1G75850	AT1G66910		AT1G33400
AT2G15620	AT1G67140	AT2G16370	AT1G67550	AT2G04040	AT1G68140	AT1G78620	AT1G66600	AT1G75950	AT1G66920		AT1G33410
AT2G15760	AT1G67190	AT2G16380	AT1G67560	AT2G04070	AT1G68150	AT1G78660	AT1G66620	AT1G75990	AT1G66960		AT1G33420
AT2G15860	AT1G67250	AT2G16405	AT1G67650	AT2G04080	AT1G68160	AT1G78670	AT1G66670	AT1G76010	AT1G66970		AT1G33470
AT2G15880	AT1G67300	AT2G16530	AT1G67800	AT2G04305	AT1G68200	AT1G78780	AT1G66680	AT1G76040	AT1G66980		AT1G33475
AT2G15890	AT1G67310	AT2G16595	AT1G67810	AT2G04340	AT1G68300	AT1G78860	AT1G66700	AT1G76150	AT1G67000		AT1G33490
AT2G15900	AT1G67325	AT2G16600	AT1G67820	AT2G04400	AT1G68330	AT1G78870	AT1G66725	AT1G76185	AT1G67060		AT1G33520
AT2G15960	AT1G67330	AT2G16710	AT1G67850	AT2G04430	AT1G68370	AT1G78890	AT1G66780	AT1G76200	AT1G67070		AT1G33560
AT2G16060	AT1G67420	AT2G16870	AT1G67860	AT2G04450	AT1G68585	AT1G78895	AT1G66880	AT1G76400	AT1G67080		AT1G33590
AT2G16090	AT1G67490	AT2G16930	AT1G67870	AT2G04490	AT1G68600	AT1G78900	AT1G66920	AT1G76510	AT1G67120		AT1G33600
AT2G16405	AT1G67500	AT2G17110	AT1G67920	AT2G04495	AT1G68620	AT1G78910	AT1G66960	AT1G76580	AT1G67140		AT1G33610
AT2G16530	AT1G67520	AT2G17120	AT1G67940	AT2G04515	AT1G68630	AT1G78920	AT1G66970	AT1G76590	AT1G67170		AT1G33612
AT2G16595	AT1G67550	AT2G17130	AT1G67960	AT2G04530	AT1G68650	AT1G79190	AT1G66980	AT1G76640	AT1G67190		AT1G33680
AT2G16600	AT1G67800	AT2G17200	AT1G67970	AT2G04550	AT1G68710	AT1G79210	AT1G67000	AT1G76700	AT1G67250		AT1G33720
AT2G16870	AT1G67810	AT2G17220	AT1G67980	AT2G04620	AT1G68820	AT1G79245	AT1G67060	AT1G76850	AT1G67310		AT1G33730
AT2G16930	AT1G67820	AT2G17380	AT1G68000	AT2G04650	AT1G68940	AT1G79340	AT1G67080	AT1G76920	AT1G67328		AT1G33770
AT2G17040	AT1G67850	AT2G17420	AT1G68100	AT2G04690	AT1G69270	AT1G79360	AT1G67120	AT1G76940	AT1G67330		AT1G33780
AT2G17120	AT1G67900	AT2G17440	AT1G68160	AT2G04852	AT1G69340	AT1G79380	AT1G67140	AT1G76960	AT1G67360		AT1G33790
AT2G17130	AT1G67920	AT2G17450	AT1G68200	AT2G04860	AT1G69360	AT1G79450	AT1G67170	AT1G76970	AT1G67470		AT1G33840
AT2G17200	AT1G67940	AT2G17520	AT1G68300	AT2G04900	AT1G69370	AT1G79590	AT1G67190	AT1G76980	AT1G67490		AT1G33940
AT2G17380	AT1G67950	AT2G17570	AT1G68390	AT2G05240	AT1G69390	AT1G79670	AT1G67250	AT1G77000	AT1G67500		AT1G33950
AT2G17450	AT1G67960	AT2G17705	AT1G68450	AT2G05260	AT1G69410	AT1G79680	AT1G67310	AT1G77130	AT1G67520		AT1G33960
AT2G17520	AT1G67970	AT2G17710	AT1G68585	AT2G05320	AT1G69450	AT1G79700	AT1G67325	AT1G77210	AT1G67550		AT1G33970
AT2G17560	AT1G67980	AT2G17720	AT1G68600	AT2G05380	AT1G69460	AT1G79710	AT1G67328	AT1G77220	AT1G67560		AT1G33980
AT2G17700	AT1G68000	AT2G17760	AT1G68620	AT2G05518	AT1G69520	AT1G79940	AT1G67330	AT1G77350	AT1G67650		AT1G33990
AT2G17705	AT1G68100	AT2G17790	AT1G68630	AT2G05520	AT1G69550	AT1G80070	AT1G67470	AT1G77370	AT1G67680		AT1G34020
AT2G17710	AT1G68160	AT2G17880	AT1G68650	AT2G05710	AT1G69670	AT1G80180	AT1G67490	AT1G77420	AT1G67800		AT1G34044
AT2G17720	AT1G68190	AT2G17920	AT1G68690	AT2G05765	AT1G69720	AT1G80210	AT1G67500	AT1G77440	AT1G67810		AT1G34060
AT2G17740	AT1G68200	AT2G17975	AT1G68710	AT2G05840	AT1G69730	AT1G80290	AT1G67520	AT1G77500	AT1G67850		AT1G34120
AT2G17760	AT1G68300	AT2G18000	AT1G68820	AT2G06002	AT1G69740	AT1G80310	AT1G67550	AT1G77510	AT1G67856		AT1G34130
AT2G17780	AT1G68310	AT2G18030	AT1G68840	AT2G06025	AT1G69780	AT1G80420	AT1G67560	AT1G77660	AT1G67860		AT1G34150
AT2G17790	AT1G68330	AT2G18170	AT1G68910	AT2G06530	AT1G69790	AT1G80450	AT1G67680	AT1G77710	AT1G67880		AT1G34160
AT2G17880	AT1G68370	AT2G18245	AT1G68980	AT2G06925	AT1G69810	AT1G80460	AT1G67800	AT1G77765	AT1G67920		AT1G34180
AT2G17975	AT1G68390	AT2G18250	AT1G69060	AT2G07180	AT1G69840	AT1G80510	AT1G67810	AT1G77810	AT1G67940		AT1G34190
AT2G18000	AT1G68450	AT2G18280	AT1G69220	AT2G07680	AT1G69890	AT1G80570	AT1G67820	AT1G77990	AT1G67960		AT1G34200
AT2G18010	AT1G68585	AT2G18290	AT1G69250	AT2G07693	AT1G69900	AT1G80820	AT1G67850	AT1G78030	AT1G67970		AT1G34220
AT2G18020	AT1G68600	AT2G18390	AT1G69270	AT2G07695	AT1G69920	AT1G80840	AT1G67860	AT1G78130	AT1G67980		AT1G34260
AT2G18030	AT1G68620	AT2G18660	AT1G69340	AT2G07715	AT1G69930	AT1G80920	AT1G67870	AT1G78190	AT1G68000		AT1G34270
AT2G18040	AT1G68650	AT2G18670	AT1G69360	AT2G07727	AT1G69960	AT1G80960	AT1G67920	AT1G78200	AT1G68100		AT1G34300
AT2G18170	AT1G68690	AT2G18690	AT1G69390	AT2G07811	AT1G69980	AT2G01010	AT1G67940	AT1G78210	AT1G68150		AT1G34315
AT2G18280	AT1G68710	AT2G18700	AT1G69410	AT2G11520	AT1G70140	AT2G01060	AT1G67960	AT1G78270	AT1G68160		AT1G34320
AT2G18290	AT1G68820	AT2G18840	AT1G69450	AT2G12490	AT1G70150	AT2G01130	AT1G67970	AT1G78410	AT1G68200		AT1G34340
AT2G18300	AT1G68840	AT2G19110	AT1G69460	AT2G12550	AT1G70160	AT2G01170	AT1G67980	AT1G78460	AT1G68300		AT1G34350
AT2G18650	AT1G68920	AT2G19130	AT1G69490	AT2G13170	AT1G70170	AT2G01180	AT1G68000	AT1G78550	AT1G68370		AT1G34360
AT2G18660	AT1G69030	AT2G19160	AT1G69520	AT2G13250	AT1G70290	AT2G01190	AT1G68020	AT1G78600	AT1G68585		AT1G34370
AT2G18670	AT1G69270	AT2G19190	AT1G69550	AT2G13560	AT1G70300	AT2G01340	AT1G68100	AT1G78620	AT1G68600		AT1G34380
AT2G18690	AT1G69340	AT2G19350	AT1G69720	AT2G13790	AT1G70320	AT2G01350	AT1G68110	AT1G78660	AT1G68620		AT1G34420
AT2G18700	AT1G69360	AT2G19690	AT1G69730	AT2G13800	AT1G70330	AT2G01450	AT1G68140	AT1G78800	AT1G68630		AT1G34470
AT2G18750	AT1G69370	AT2G19710	AT1G69740	AT2G13810	AT1G70420	AT2G01460	AT1G68150	AT1G78830	AT1G68650		AT1G34630
AT2G18770	AT1G69390	AT2G19730	AT1G69780	AT2G14080	AT1G70490	AT2G01470	AT1G68160	AT1G78870	AT1G68690		AT1G34750
AT2G18840	AT1G69410	AT2G19740	AT1G69810	AT2G14120	AT1G70518	AT2G01490	AT1G68300	AT1G78890	AT1G68710		AT1G34760
AT2G19120	AT1G69440	AT2G19790	AT1G69840	AT2G14170	AT1G70520	AT2G01540	AT1G68310	AT1G78895	AT1G68820		AT1G35160
AT2G19130	AT1G69450	AT2G19810	AT1G69850	AT2G14255	AT1G70530	AT2G01620	AT1G68370	AT1G78910	AT1G68940		AT1G35190
AT2G19190	AT1G69460	AT2G19830	AT1G69890	AT2G14560	AT1G70590	AT2G01650	AT1G68585	AT1G78920	AT1G68980		AT1G35210
AT2G19250	AT1G69485	AT2G19950	AT1G69900	AT2G14610	AT1G70690	AT2G01670	AT1G68600	AT1G79010	AT1G69060		AT1G35220
AT2G19350	AT1G69490	AT2G20010	AT1G69920	AT2G14680	AT1G70770	AT2G01720	AT1G68620	AT1G79110	AT1G69220		AT1G35230
AT2G19600	AT1G69510	AT2G20050	AT1G69930	AT2G14720	AT1G70810	AT2G01735	AT1G68650	AT1G79190	AT1G69250		AT1G35300
AT2G19730	AT1G69520	AT2G20060	AT1G69960	AT2G14830	AT1G70820	AT2G02010	AT1G68690	AT1G79210	AT1G69270		AT1G35320
AT2G19740	AT1G69550	AT2G20140	AT1G69980	AT2G14835	AT1G70980	AT2G02040	AT1G68710	AT1G79340	AT1G69340		AT1G35350
AT2G19790	AT1G69610	AT2G20142	AT1G70140	AT2G14878	AT1G71040	AT2G02050	AT1G68765	AT1G79360	AT1G69350		AT1G35430
AT2G19810	AT1G69670	AT2G20230	AT1G70160	AT2G15040	AT1G71080	AT2G02060	AT1G68820	AT1G79380	AT1G69360		AT1G35560
AT2G19830	AT1G69720	AT2G20390	AT1G70170	AT2G15042	AT1G71100	AT2G02080	AT1G68930	AT1G79450	AT1G69410		AT1G35580
AT2G19950	AT1G69730	AT2G20420	AT1G70290	AT2G15080	AT1G71140	AT2G02180	AT1G69060	AT1G79590	AT1G69450		AT1G35590
AT2G20010	AT1G69740	AT2G20530	AT1G70300	AT2G15220	AT1G71170	AT2G02220	AT1G69220	AT1G79670	AT1G69460		AT1G35612
AT2G20060	AT1G69780	AT2G20580	AT1G70320	AT2G15230	AT1G71190	AT2G02360	AT1G69250	AT1G79680	AT1G69520		AT1G35620
AT2G20142	AT1G69790	AT2G20630	AT1G70330	AT2G15240	AT1G71210	AT2G02370	AT1G69270	AT1G79690	AT1G69530		AT1G35660
AT2G20260	AT1G69810	AT2G20650	AT1G70420	AT2G15390	AT1G71220	AT2G02390	AT1G69340	AT1G79700	AT1G69550		AT1G35670
AT2G20360	AT1G69840	AT2G20740	AT1G70490	AT2G15480	AT1G71230	AT2G02410	AT1G69350	AT1G79730	AT1G69610		AT1G35710
AT2G20390	AT1G69850	AT2G20760	AT1G70518	AT2G15555	AT1G71270	AT2G02510	AT1G69360	AT1G79830	AT1G69640		AT1G35720
AT2G20420	AT1G69890	AT2G20770	AT1G70520	AT2G15570	AT1G71390	AT2G02710	AT1G69410	AT1G79930	AT1G69670		AT1G36050
AT2G20580	AT1G69900	AT2G20780	AT1G70530	AT2G15860	AT1G71400	AT2G02760	AT1G69450	AT1G79940	AT1G69720		AT1G36060
AT2G20630	AT1G69920	AT2G20790	AT1G70590	AT2G15880	AT1G71440	AT2G02810	AT1G69460	AT1G79990	AT1G69730		AT1G36070
AT2G20650	AT1G69930	AT2G20820	AT1G70690	AT2G15890	AT1G71520	AT2G02850	AT1G69520	AT1G80070	AT1G69750		AT1G36200
AT2G20760	AT1G69960	AT2G20850	AT1G70740	AT2G15900	AT1G71696	AT2G02930	AT1G69550	AT1G80130	AT1G69810		AT1G36380
AT2G20770	AT1G69980	AT2G20900	AT1G70750	AT2G15960	AT1G71697	AT2G02960	AT1G69610	AT1G80180	AT1G69840		AT1G36470
AT2G20780	AT1G70140	AT2G20930	AT1G70770	AT2G15980	AT1G71780	AT2G03120	AT1G69640	AT1G80230	AT1G69890		AT1G36600
AT2G20790	AT1G70150	AT2G20960	AT1G70810	AT2G16000	AT1G71800	AT2G03290	AT1G69670	AT1G80290	AT1G69900		AT1G36620
AT2G20820	AT1G70160	AT2G21240	AT1G70820	AT2G16060	AT1G71820	AT2G03310	AT1G69720	AT1G80420	AT1G69920		AT1G36622
AT2G20850	AT1G70170	AT2G21250	AT1G70940	AT2G16380	AT1G71860	AT2G03330	AT1G69730	AT1G80460	AT1G69930		AT1G36640
AT2G20900	AT1G70290	AT2G21350	AT1G70980	AT2G16405	AT1G71910	AT2G03410	AT1G69750	AT1G80500	AT1G69960		AT1G36940
AT2G20930	AT1G70300	AT2G21500	AT1G71030	AT2G16530	AT1G72000	AT2G03430	AT1G69780	AT1G80510	AT1G69980		AT1G36975
AT2G20960	AT1G70320	AT2G21520	AT1G71040	AT2G16595	AT1G72010	AT2G03450	AT1G69790	AT1G80570	AT1G70140		AT1G36980
AT2G20990	AT1G70330	AT2G21550	AT1G71080	AT2G16600	AT1G72020	AT2G03470	AT1G69810	AT1G80650	AT1G70150		AT1G37110
AT2G21020	AT1G70420	AT2G21620	AT1G71090	AT2G16710	AT1G72060	AT2G03510	AT1G69828	AT1G80890	AT1G70160		AT1G37801
AT2G21050	AT1G70490	AT2G21630	AT1G71100	AT2G16790	AT1G72120	AT2G03530	AT1G69840	AT1G80910	AT1G70170		AT1G37867
AT2G21160	AT1G70518	AT2G21850	AT1G71140	AT2G16870	AT1G72180	AT2G03540	AT1G69850	AT1G80920	AT1G70250		AT1G39190
AT2G21188	AT1G70520	AT2G21870	AT1G71170	AT2G16930	AT1G72220	AT2G03590	AT1G69890	AT1G80960	AT1G70300		AT1G40101
AT2G21240	AT1G70530	AT2G21910	AT1G71180	AT2G16950	AT1G72280	AT2G03680	AT1G69900	AT2G01010	AT1G70320		AT1G40123
AT2G21250	AT1G70581	AT2G22120	AT1G71190	AT2G17040	AT1G72330	AT2G03690	AT1G69920	AT2G01021	AT1G70420		AT1G42130
AT2G21350	AT1G70690	AT2G22122	AT1G71210	AT2G17110	AT1G72390	AT2G03760	AT1G69930	AT2G01029	AT1G70490		AT1G42480
AT2G21390	AT1G70740	AT2G22300	AT1G71220	AT2G17115	AT1G72420	AT2G03830	AT1G69960	AT2G01040	AT1G70518		AT1G42705
AT2G21500	AT1G70750	AT2G22425	AT1G71270	AT2G17120	AT1G72450	AT2G03870	AT1G69980	AT2G01060	AT1G70520		AT1G42960
AT2G21520	AT1G70770	AT2G22480	AT1G71390	AT2G17130	AT1G72520	AT2G03890	AT1G70140	AT2G01100	AT1G70530		AT1G42990
AT2G21530	AT1G70810	AT2G22570	AT1G71400	AT2G17200	AT1G72540	AT2G03980	AT1G70150	AT2G01130	AT1G70590		AT1G43000
AT2G21620	AT1G70820	AT2G22660	AT1G71410	AT2G17220	AT1G72680	AT2G04040	AT1G70160	AT2G01140	AT1G70650		AT1G43130
AT2G21630	AT1G70940	AT2G22690	AT1G71440	AT2G17290	AT1G72690	AT2G04070	AT1G70170	AT2G01170	AT1G70690		AT1G43160
AT2G21850	AT1G70980	AT2G22830	AT1G71530	AT2G17380	AT1G72700	AT2G04080	AT1G70300	AT2G01180	AT1G70740		AT1G43245
AT2G21870	AT1G71030	AT2G22840	AT1G71696	AT2G17420	AT1G72710	AT2G04305	AT1G70320	AT2G01340	AT1G70770		AT1G43502
AT2G22122	AT1G71040	AT2G22980	AT1G71697	AT2G17440	AT1G72830	AT2G04400	AT1G70330	AT2G01350	AT1G70810		AT1G43590
AT2G22300	AT1G71080	AT2G23093	AT1G71780	AT2G17520	AT1G72855	AT2G04410	AT1G70420	AT2G01400	AT1G70980		AT1G43620
AT2G22370	AT1G71100	AT2G23170	AT1G71800	AT2G17570	AT1G72870	AT2G04430	AT1G70518	AT2G01410	AT1G71040		AT1G43675
AT2G22425	AT1G71140	AT2G23200	AT1G71820	AT2G17705	AT1G72890	AT2G04450	AT1G70520	AT2G01440	AT1G71080		AT1G43690
AT2G22475	AT1G71170	AT2G23270	AT1G71860	AT2G17710	AT1G72900	AT2G04490	AT1G70530	AT2G01450	AT1G71100		AT1G43770
AT2G22480	AT1G71190	AT2G23310	AT1G71880	AT2G17720	AT1G72910	AT2G04495	AT1G70590	AT2G01470	AT1G71140		AT1G43860
AT2G22570	AT1G71210	AT2G23320	AT1G71890	AT2G17740	AT1G72920	AT2G04515	AT1G70690	AT2G01540	AT1G71170		AT1G43890
AT2G22660	AT1G71220	AT2G23330	AT1G71910	AT2G17760	AT1G72930	AT2G04620	AT1G70740	AT2G01600	AT1G71190		AT1G43910
AT2G22780	AT1G71270	AT2G23450	AT1G72010	AT2G17790	AT1G72940	AT2G04630	AT1G70750	AT2G01650	AT1G71210		AT1G43980
AT2G22830	AT1G71390	AT2G23680	AT1G72020	AT2G17880	AT1G72950	AT2G04690	AT1G70770	AT2G01670	AT1G71220		AT1G44070
AT2G22840	AT1G71400	AT2G23720	AT1G72060	AT2G17920	AT1G73010	AT2G04852	AT1G70810	AT2G01680	AT1G71230		AT1G44125
AT2G22880	AT1G71410	AT2G23770	AT1G72070	AT2G17975	AT1G73030	AT2G04860	AT1G70820	AT2G01720	AT1G71270		AT1G44130
AT2G23090	AT1G71440	AT2G23810	AT1G72120	AT2G17980	AT1G73130	AT2G04890	AT1G70980	AT2G02010	AT1G71390		AT1G44170
AT2G23093	AT1G71530	AT2G23820	AT1G72280	AT2G18000	AT1G73150	AT2G04900	AT1G71040	AT2G02040	AT1G71400		AT1G44350
AT2G23170	AT1G71696	AT2G23830	AT1G72300	AT2G18170	AT1G73200	AT2G05030	AT1G71080	AT2G02050	AT1G71696		AT1G44510
AT2G23200	AT1G71697	AT2G23890	AT1G72330	AT2G18210	AT1G73250	AT2G05040	AT1G71090	AT2G02060	AT1G71697		AT1G44750
AT2G23270	AT1G71800	AT2G23940	AT1G72340	AT2G18250	AT1G73260	AT2G05260	AT1G71100	AT2G02080	AT1G71780		AT1G44770
AT2G23310	AT1G71820	AT2G24160	AT1G72390	AT2G18280	AT1G73380	AT2G05320	AT1G71140	AT2G02110	AT1G71800		AT1G44780
AT2G23320	AT1G71860	AT2G24170	AT1G72410	AT2G18290	AT1G73500	AT2G05380	AT1G71170	AT2G02180	AT1G71820		AT1G44790
AT2G23450	AT1G71865	AT2G24200	AT1G72480	AT2G18350	AT1G73680	AT2G05518	AT1G71180	AT2G02220	AT1G71840		AT1G44800
AT2G23680	AT1G71880	AT2G24240	AT1G72540	AT2G18650	AT1G73720	AT2G05520	AT1G71190	AT2G02350	AT1G71860		AT1G45000
AT2G23770	AT1G71890	AT2G24290	AT1G72680	AT2G18660	AT1G73805	AT2G05710	AT1G71210	AT2G02360	AT1G71910		AT1G45035
AT2G23810	AT1G71910	AT2G24360	AT1G72700	AT2G18670	AT1G73810	AT2G05765	AT1G71220	AT2G02370	AT1G72000		AT1G45050
AT2G23820	AT1G71940	AT2G24390	AT1G72830	AT2G18690	AT1G73820	AT2G05840	AT1G71230	AT2G02390	AT1G72060		AT1G45145
AT2G23890	AT1G71970	AT2G24550	AT1G72852	AT2G18700	AT1G73875	AT2G06002	AT1G71270	AT2G02400	AT1G72120		AT1G45150
AT2G23940	AT1G72000	AT2G24600	AT1G72855	AT2G18750	AT1G73920	AT2G06005	AT1G71390	AT2G02410	AT1G72160		AT1G45163
AT2G24160	AT1G72010	AT2G24765	AT1G72890	AT2G18840	AT1G73970	AT2G06025	AT1G71400	AT2G02510	AT1G72280		AT1G45231
AT2G24165	AT1G72060	AT2G24850	AT1G72900	AT2G19110	AT1G73980	AT2G06255	AT1G71410	AT2G02560	AT1G72330		AT1G45233
AT2G24170	AT1G72120	AT2G24860	AT1G72910	AT2G19130	AT1G74010	AT2G06510	AT1G71440	AT2G02580	AT1G72340		AT1G45332
AT2G24200	AT1G72220	AT2G25070	AT1G72920	AT2G19160	AT1G74020	AT2G06530	AT1G71520	AT2G02590	AT1G72390		AT1G45976
AT2G24240	AT1G72280	AT2G25110	AT1G72930	AT2G19180	AT1G74080	AT2G07180	AT1G71696	AT2G02760	AT1G72420		AT1G46554
AT2G24300	AT1G72330	AT2G25190	AT1G72940	AT2G19190	AT1G74088	AT2G07680	AT1G71697	AT2G02800	AT1G72540		AT1G47056
AT2G24360	AT1G72390	AT2G25200	AT1G72950	AT2G19250	AT1G74170	AT2G07715	AT1G71800	AT2G02810	AT1G72680		AT1G47128
AT2G24390	AT1G72420	AT2G25300	AT1G73010	AT2G19350	AT1G74200	AT2G07727	AT1G71820	AT2G02930	AT1G72700		AT1G47200
AT2G24550	AT1G72450	AT2G25310	AT1G73030	AT2G19710	AT1G74210	AT2G07808	AT1G71860	AT2G02960	AT1G72710		AT1G47250
AT2G24600	AT1G72520	AT2G25350	AT1G73130	AT2G19730	AT1G74230	AT2G07811	AT1G71865	AT2G03120	AT1G72750		AT1G47260
AT2G24755	AT1G72540	AT2G25470	AT1G73200	AT2G19740	AT1G74240	AT2G11270	AT1G71890	AT2G03220	AT1G72830		AT1G47270
AT2G24850	AT1G72660	AT2G25490	AT1G73250	AT2G19790	AT1G74260	AT2G11520	AT1G71910	AT2G03330	AT1G72855		AT1G47290
AT2G24860	AT1G72680	AT2G25510	AT1G73260	AT2G19800	AT1G74280	AT2G12210	AT1G72060	AT2G03410	AT1G72860		AT1G47310
AT2G25000	AT1G72690	AT2G25520	AT1G73380	AT2G19810	AT1G74300	AT2G12490	AT1G72120	AT2G03430	AT1G72870		AT1G47330
AT2G25070	AT1G72700	AT2G25590	AT1G73430	AT2G19830	AT1G74340	AT2G12550	AT1G72150	AT2G03450	AT1G72900		AT1G47360
AT2G25110	AT1G72710	AT2G25735	AT1G73500	AT2G19950	AT1G74350	AT2G13100	AT1G72160	AT2G03470	AT1G72910		AT1G47420
AT2G25180	AT1G72820	AT2G25737	AT1G73670	AT2G20010	AT1G74360	AT2G13560	AT1G72220	AT2G03505	AT1G72920		AT1G47480
AT2G25190	AT1G72830	AT2G25770	AT1G73680	AT2G20060	AT1G74410	AT2G13650	AT1G72280	AT2G03510	AT1G72930		AT1G47520
AT2G25200	AT1G72840	AT2G25790	AT1G73805	AT2G20130	AT1G74440	AT2G13790	AT1G72330	AT2G03530	AT1G72950		AT1G47550
AT2G25280	AT1G72855	AT2G25850	AT1G73810	AT2G20142	AT1G74590	AT2G13800	AT1G72420	AT2G03540	AT1G73010		AT1G47560
AT2G25300	AT1G72870	AT2G25910	AT1G73830	AT2G20320	AT1G74600	AT2G13810	AT1G72520	AT2G03590	AT1G73030		AT1G47603
AT2G25350	AT1G72890	AT2G25930	AT1G73920	AT2G20390	AT1G74640	AT2G14120	AT1G72540	AT2G03620	AT1G73130		AT1G47640
AT2G25440	AT1G72900	AT2G26030	AT1G73980	AT2G20420	AT1G74680	AT2G14170	AT1G72680	AT2G03680	AT1G73200		AT1G47650
AT2G25450	AT1G72910	AT2G26070	AT1G74010	AT2G20562	AT1G74710	AT2G14560	AT1G72700	AT2G03760	AT1G73250		AT1G47710
AT2G25470	AT1G72920	AT2G26190	AT1G74020	AT2G20580	AT1G74740	AT2G14610	AT1G72710	AT2G03870	AT1G73260		AT1G47750
AT2G25510	AT1G72930	AT2G26230	AT1G74080	AT2G20630	AT1G74950	AT2G14680	AT1G72830	AT2G03890	AT1G73380		AT1G47830
AT2G25520	AT1G72940	AT2G26240	AT1G74088	AT2G20650	AT1G75000	AT2G14720	AT1G72840	AT2G04040	AT1G73480		AT1G47840
AT2G25735	AT1G72950	AT2G26260	AT1G74170	AT2G20760	AT1G75040	AT2G14830	AT1G72852	AT2G04050	AT1G73500		AT1G47860
AT2G25737	AT1G72990	AT2G26300	AT1G74210	AT2G20770	AT1G75130	AT2G14878	AT1G72860	AT2G04070	AT1G73670		AT1G47880
AT2G25900	AT1G73030	AT2G26400	AT1G74230	AT2G20780	AT1G75140	AT2G15040	AT1G72900	AT2G04080	AT1G73680		AT1G47890
AT2G26010	AT1G73200	AT2G26430	AT1G74240	AT2G20790	AT1G75170	AT2G15042	AT1G72910	AT2G04100	AT1G73805		AT1G47960
AT2G26020	AT1G73250	AT2G26440	AT1G74260	AT2G20820	AT1G75200	AT2G15080	AT1G72920	AT2G04305	AT1G73810		AT1G47980
AT2G26030	AT1G73260	AT2G26510	AT1G74280	AT2G20900	AT1G75220	AT2G15230	AT1G72930	AT2G04340	AT1G73875		AT1G48000
AT2G26190	AT1G73380	AT2G26530	AT1G74300	AT2G20930	AT1G75230	AT2G15240	AT1G72940	AT2G04400	AT1G73980		AT1G48050
AT2G26230	AT1G73430	AT2G26560	AT1G74330	AT2G20960	AT1G75270	AT2G15390	AT1G73030	AT2G04430	AT1G74010		AT1G48090
AT2G26240	AT1G73500	AT2G26600	AT1G74340	AT2G21120	AT1G75380	AT2G15480	AT1G73200	AT2G04450	AT1G74020		AT1G48120
AT2G26260	AT1G73720	AT2G26650	AT1G74350	AT2G21188	AT1G75410	AT2G15490	AT1G73250	AT2G04495	AT1G74080		AT1G48140
AT2G26400	AT1G73750	AT2G26780	AT1G74360	AT2G21240	AT1G75420	AT2G15570	AT1G73260	AT2G04515	AT1G74088		AT1G48160
AT2G26440	AT1G73805	AT2G26900	AT1G74440	AT2G21350	AT1G75510	AT2G15760	AT1G73380	AT2G04520	AT1G74170		AT1G48170
AT2G26510	AT1G73810	AT2G26970	AT1G74590	AT2G21390	AT1G75560	AT2G15860	AT1G73480	AT2G04530	AT1G74200		AT1G48200
AT2G26530	AT1G73820	AT2G26975	AT1G74600	AT2G21470	AT1G75660	AT2G15880	AT1G73500	AT2G04540	AT1G74210		AT1G48210
AT2G26560	AT1G73830	AT2G27020	AT1G74640	AT2G21500	AT1G75830	AT2G15890	AT1G73670	AT2G04620	AT1G74230		AT1G48280
AT2G26600	AT1G73875	AT2G27030	AT1G74650	AT2G21520	AT1G75850	AT2G15900	AT1G73680	AT2G04630	AT1G74280		AT1G48320
AT2G26650	AT1G73920	AT2G27050	AT1G74680	AT2G21550	AT1G75990	AT2G15960	AT1G73805	AT2G04650	AT1G74300		AT1G48360
AT2G26710	AT1G73980	AT2G27200	AT1G74710	AT2G21620	AT1G76030	AT2G16060	AT1G73810	AT2G04690	AT1G74340		AT1G48370
AT2G26780	AT1G74010	AT2G27460	AT1G74740	AT2G21630	AT1G76040	AT2G16380	AT1G73980	AT2G04860	AT1G74350		AT1G48380
AT2G26900	AT1G74020	AT2G27600	AT1G74750	AT2G21850	AT1G76070	AT2G16405	AT1G74020	AT2G04900	AT1G74360		AT1G48410
AT2G26975	AT1G74080	AT2G27730	AT1G75000	AT2G21870	AT1G76150	AT2G16530	AT1G74080	AT2G05170	AT1G74410		AT1G48420
AT2G27020	AT1G74088	AT2G27830	AT1G75040	AT2G21900	AT1G76200	AT2G16595	AT1G74088	AT2G05240	AT1G74440		AT1G48430
AT2G27030	AT1G74170	AT2G27900	AT1G75130	AT2G22122	AT1G76320	AT2G16600	AT1G74100	AT2G05260	AT1G74450		AT1G48440
AT2G27050	AT1G74210	AT2G27920	AT1G75140	AT2G22300	AT1G76390	AT2G16660	AT1G74170	AT2G05320	AT1G74590		AT1G48490
AT2G27310	AT1G74230	AT2G28120	AT1G75150	AT2G22310	AT1G76400	AT2G16710	AT1G74210	AT2G05380	AT1G74600		AT1G48510
AT2G27330	AT1G74240	AT2G28360	AT1G75170	AT2G22425	AT1G76470	AT2G16720	AT1G74230	AT2G05518	AT1G74640		AT1G48550
AT2G27460	AT1G74280	AT2G28430	AT1G75200	AT2G22480	AT1G76520	AT2G16790	AT1G74240	AT2G05520	AT1G74650		AT1G48570
AT2G27600	AT1G74300	AT2G28630	AT1G75220	AT2G22500	AT1G76580	AT2G16870	AT1G74280	AT2G05630	AT1G74680		AT1G48605
AT2G27660	AT1G74340	AT2G28660	AT1G75230	AT2G22630	AT1G76590	AT2G16900	AT1G74300	AT2G05710	AT1G74710		AT1G48620
AT2G27720	AT1G74360	AT2G28830	AT1G75270	AT2G22660	AT1G76600	AT2G16930	AT1G74360	AT2G05765	AT1G74740		AT1G48760
AT2G27730	AT1G74440	AT2G28840	AT1G75380	AT2G22690	AT1G76640	AT2G17040	AT1G74410	AT2G05840	AT1G74750		AT1G48790
AT2G27770	AT1G74590	AT2G28890	AT1G75410	AT2G22780	AT1G76650	AT2G17060	AT1G74430	AT2G06025	AT1G75000		AT1G48850
AT2G27830	AT1G74600	AT2G28940	AT1G75490	AT2G22830	AT1G76700	AT2G17110	AT1G74440	AT2G06340	AT1G75040		AT1G48900
AT2G27900	AT1G74640	AT2G29020	AT1G75510	AT2G22840	AT1G76760	AT2G17120	AT1G74450	AT2G06490	AT1G75130		AT1G48960
AT2G27920	AT1G74650	AT2G29070	AT1G75660	AT2G22880	AT1G76850	AT2G17130	AT1G74560	AT2G06510	AT1G75140		AT1G48970
AT2G28120	AT1G74680	AT2G29100	AT1G75830	AT2G22910	AT1G76900	AT2G17200	AT1G74590	AT2G07180	AT1G75170		AT1G49000
AT2G28160	AT1G74710	AT2G29310	AT1G75850	AT2G22980	AT1G76920	AT2G17220	AT1G74600	AT2G07240	AT1G75180		AT1G49032
AT2G28360	AT1G74930	AT2G29340	AT1G75990	AT2G23090	AT1G76940	AT2G17290	AT1G74640	AT2G07340	AT1G75200		AT1G49040
AT2G28370	AT1G74940	AT2G29400	AT1G76030	AT2G23170	AT1G76960	AT2G17380	AT1G74650	AT2G07360	AT1G75220		AT1G49050
AT2G28400	AT1G75040	AT2G29410	AT1G76040	AT2G23200	AT1G76970	AT2G17440	AT1G74680	AT2G07667	AT1G75270		AT1G49130
AT2G28430	AT1G75130	AT2G29460	AT1G76070	AT2G23270	AT1G76980	AT2G17520	AT1G74700	AT2G07715	AT1G75380		AT1G49140
AT2G28500	AT1G75140	AT2G29525	AT1G76150	AT2G23310	AT1G77000	AT2G17525	AT1G74710	AT2G11520	AT1G75410		AT1G49160
AT2G28630	AT1G75170	AT2G29640	AT1G76200	AT2G23320	AT1G77130	AT2G17570	AT1G74750	AT2G11670	AT1G75420		AT1G49170
AT2G28660	AT1G75200	AT2G29670	AT1G76390	AT2G23330	AT1G77140	AT2G17705	AT1G75000	AT2G12490	AT1G75510		AT1G49180
AT2G28755	AT1G75270	AT2G29690	AT1G76400	AT2G23450	AT1G77210	AT2G17710	AT1G75040	AT2G12550	AT1G75760		AT1G49210
AT2G28830	AT1G75370	AT2G29720	AT1G76470	AT2G23680	AT1G77220	AT2G17720	AT1G75130	AT2G13170	AT1G75830		AT1G49230
AT2G28840	AT1G75380	AT2G29740	AT1G76520	AT2G23720	AT1G77300	AT2G17730	AT1G75140	AT2G13450	AT1G75850		AT1G49240
AT2G28890	AT1G75400	AT2G29750	AT1G76560	AT2G23770	AT1G77350	AT2G17740	AT1G75170	AT2G13460	AT1G75990		AT1G49300
AT2G28940	AT1G75410	AT2G29990	AT1G76590	AT2G23810	AT1G77360	AT2G17760	AT1G75200	AT2G13560	AT1G76040		AT1G49340
AT2G29020	AT1G75420	AT2G30250	AT1G76600	AT2G23830	AT1G77370	AT2G17790	AT1G75220	AT2G13600	AT1G76150		AT1G49350
AT2G29110	AT1G75440	AT2G30260	AT1G76640	AT2G23890	AT1G77380	AT2G17930	AT1G75230	AT2G13650	AT1G76320		AT1G49360
AT2G29120	AT1G75490	AT2G30270	AT1G76650	AT2G24160	AT1G77420	AT2G17975	AT1G75380	AT2G13790	AT1G76390		AT1G49410
AT2G29400	AT1G75500	AT2G30410	AT1G76680	AT2G24170	AT1G77440	AT2G17980	AT1G75410	AT2G13800	AT1G76400		AT1G49470
AT2G29460	AT1G75510	AT2G30424	AT1G76700	AT2G24180	AT1G77460	AT2G17990	AT1G75420	AT2G13810	AT1G76470		AT1G49480
AT2G29470	AT1G75830	AT2G30440	AT1G76710	AT2G24200	AT1G77480	AT2G18000	AT1G75510	AT2G14080	AT1G76510		AT1G49500
AT2G29560	AT1G75850	AT2G30530	AT1G76850	AT2G24240	AT1G77500	AT2G18050	AT1G75730	AT2G14120	AT1G76520		AT1G49540
AT2G29670	AT1G75990	AT2G30550	AT1G76900	AT2G24360	AT1G77510	AT2G18170	AT1G75760	AT2G14170	AT1G76580		AT1G49670
AT2G29680	AT1G76040	AT2G30570	AT1G76930	AT2G24390	AT1G77620	AT2G18250	AT1G75830	AT2G14255	AT1G76590		AT1G49700
AT2G29690	AT1G76070	AT2G30590	AT1G76940	AT2G24600	AT1G77660	AT2G18350	AT1G75850	AT2G14410	AT1G76600		AT1G49710
AT2G29720	AT1G76150	AT2G30600	AT1G76960	AT2G24645	AT1G77770	AT2G18650	AT1G75990	AT2G14560	AT1G76640		AT1G49720
AT2G29740	AT1G76260	AT2G30710	AT1G76970	AT2G24765	AT1G77810	AT2G18660	AT1G76040	AT2G14610	AT1G76650		AT1G49730
AT2G29990	AT1G76320	AT2G30770	AT1G76980	AT2G24850	AT1G77890	AT2G18670	AT1G76060	AT2G14680	AT1G76680		AT1G49750
AT2G30010	AT1G76400	AT2G30860	AT1G77000	AT2G24860	AT1G77920	AT2G18690	AT1G76150	AT2G14720	AT1G76700		AT1G49820
AT2G30050	AT1G76470	AT2G30870	AT1G77130	AT2G25000	AT1G78130	AT2G18750	AT1G76390	AT2G14740	AT1G76760		AT1G49850
AT2G30060	AT1G76520	AT2G30880	AT1G77140	AT2G25070	AT1G78190	AT2G18770	AT1G76400	AT2G14835	AT1G76850		AT1G49900
AT2G30110	AT1G76600	AT2G31020	AT1G77210	AT2G25090	AT1G78200	AT2G18840	AT1G76470	AT2G14878	AT1G76900		AT1G49970
AT2G30190	AT1G76640	AT2G31060	AT1G77220	AT2G25110	AT1G78210	AT2G19110	AT1G76520	AT2G15040	AT1G76930		AT1G50010
AT2G30230	AT1G76680	AT2G31090	AT1G77300	AT2G25190	AT1G78270	AT2G19130	AT1G76580	AT2G15042	AT1G76940		AT1G50030
AT2G30250	AT1G76700	AT2G31260	AT1G77350	AT2G25200	AT1G78280	AT2G19160	AT1G76590	AT2G15080	AT1G76960		AT1G50120
AT2G30260	AT1G76760	AT2G31350	AT1G77360	AT2G25300	AT1G78380	AT2G19180	AT1G76600	AT2G15230	AT1G76970		AT1G50170
AT2G30270	AT1G76850	AT2G31580	AT1G77370	AT2G25350	AT1G78410	AT2G19190	AT1G76640	AT2G15240	AT1G76980		AT1G50180
AT2G30410	AT1G76900	AT2G31585	AT1G77380	AT2G25470	AT1G78420	AT2G19340	AT1G76650	AT2G15292	AT1G77000		AT1G50360
AT2G30424	AT1G76930	AT2G31800	AT1G77420	AT2G25490	AT1G78460	AT2G19350	AT1G76680	AT2G15390	AT1G77130		AT1G50380
AT2G30440	AT1G76940	AT2G31810	AT1G77440	AT2G25510	AT1G78550	AT2G19450	AT1G76700	AT2G15430	AT1G77140		AT1G50400
AT2G30570	AT1G76960	AT2G31865	AT1G77460	AT2G25520	AT1G78600	AT2G19710	AT1G76710	AT2G15480	AT1G77210		AT1G50410
AT2G30600	AT1G76970	AT2G31870	AT1G77500	AT2G25735	AT1G78620	AT2G19790	AT1G76850	AT2G15555	AT1G77220		AT1G50430
AT2G30710	AT1G76980	AT2G31880	AT1G77510	AT2G25740	AT1G78660	AT2G19800	AT1G76930	AT2G15570	AT1G77300		AT1G50440
AT2G30720	AT1G77000	AT2G31945	AT1G77660	AT2G25790	AT1G78780	AT2G19830	AT1G76940	AT2G15790	AT1G77350		AT1G50480
AT2G30770	AT1G77130	AT2G31955	AT1G77770	AT2G25850	AT1G78800	AT2G19950	AT1G76960	AT2G15860	AT1G77370		AT1G50500
AT2G30860	AT1G77140	AT2G31990	AT1G77810	AT2G25910	AT1G78830	AT2G20010	AT1G76970	AT2G15880	AT1G77380		AT1G50510
AT2G30870	AT1G77220	AT2G32010	AT1G77960	AT2G26010	AT1G78850	AT2G20050	AT1G76980	AT2G15890	AT1G77420		AT1G50520
AT2G30920	AT1G77350	AT2G32030	AT1G78000	AT2G26020	AT1G78870	AT2G20120	AT1G77000	AT2G15900	AT1G77440		AT1G50560
AT2G31020	AT1G77370	AT2G32090	AT1G78130	AT2G26190	AT1G78895	AT2G20142	AT1G77010	AT2G15960	AT1G77460		AT1G50570
AT2G31060	AT1G77380	AT2G32160	AT1G78190	AT2G26230	AT1G78900	AT2G20150	AT1G77130	AT2G16000	AT1G77500		AT1G50700
AT2G31090	AT1G77420	AT2G32380	AT1G78200	AT2G26240	AT1G78910	AT2G20230	AT1G77140	AT2G16060	AT1G77510		AT1G50730
AT2G31200	AT1G77440	AT2G32390	AT1G78270	AT2G26260	AT1G78920	AT2G20320	AT1G77210	AT2G16090	AT1G77660		AT1G50735
AT2G31230	AT1G77450	AT2G32400	AT1G78280	AT2G26300	AT1G79000	AT2G20420	AT1G77220	AT2G16310	AT1G77765		AT1G50740
AT2G31300	AT1G77460	AT2G32487	AT1G78380	AT2G26390	AT1G79010	AT2G20562	AT1G77350	AT2G16390	AT1G77810		AT1G50830
AT2G31580	AT1G77480	AT2G32520	AT1G78410	AT2G26400	AT1G79110	AT2G20580	AT1G77360	AT2G16405	AT1G77840		AT1G50940
AT2G31585	AT1G77500	AT2G32650	AT1G78420	AT2G26440	AT1G79190	AT2G20610	AT1G77370	AT2G16530	AT1G77920		AT1G50950
AT2G31800	AT1G77510	AT2G32680	AT1G78460	AT2G26510	AT1G79210	AT2G20630	AT1G77420	AT2G16595	AT1G78130		AT1G51140
AT2G31865	AT1G77660	AT2G32700	AT1G78550	AT2G26530	AT1G79280	AT2G20650	AT1G77440	AT2G16600	AT1G78190		AT1G51160
AT2G31870	AT1G77770	AT2G32730	AT1G78600	AT2G26560	AT1G79340	AT2G20740	AT1G77460	AT2G16640	AT1G78200		AT1G51170
AT2G31880	AT1G77810	AT2G32850	AT1G78620	AT2G26600	AT1G79360	AT2G20760	AT1G77500	AT2G16660	AT1G78210		AT1G51270
AT2G31955	AT1G77890	AT2G32880	AT1G78660	AT2G26650	AT1G79380	AT2G20770	AT1G77510	AT2G16670	AT1G78280		AT1G51310
AT2G32010	AT1G77920	AT2G32900	AT1G78780	AT2G26670	AT1G79400	AT2G20780	AT1G77620	AT2G16710	AT1G78380		AT1G51390
AT2G32020	AT1G78130	AT2G32920	AT1G78800	AT2G26780	AT1G79450	AT2G20790	AT1G77660	AT2G16720	AT1G78410		AT1G51400
AT2G32030	AT1G78190	AT2G33020	AT1G78830	AT2G26890	AT1G79530	AT2G20820	AT1G77810	AT2G16870	AT1G78420		AT1G51402
AT2G32090	AT1G78200	AT2G33040	AT1G78850	AT2G26900	AT1G79540	AT2G20850	AT1G77890	AT2G16930	AT1G78460		AT1G51510
AT2G32100	AT1G78270	AT2G33051	AT1G78870	AT2G26970	AT1G79550	AT2G20900	AT1G77920	AT2G16950	AT1G78550		AT1G51540
AT2G32160	AT1G78280	AT2G33080	AT1G78890	AT2G26975	AT1G79610	AT2G20920	AT1G78130	AT2G17040	AT1G78600		AT1G51550
AT2G32170	AT1G78380	AT2G33120	AT1G78895	AT2G27020	AT1G79670	AT2G20930	AT1G78190	AT2G17110	AT1G78620		AT1G51590
AT2G32190	AT1G78410	AT2G33150	AT1G78900	AT2G27030	AT1G79680	AT2G20960	AT1G78200	AT2G17120	AT1G78660		AT1G51620
AT2G32200	AT1G78420	AT2G33170	AT1G78920	AT2G27150	AT1G79690	AT2G21020	AT1G78210	AT2G17130	AT1G78780		AT1G51640
AT2G32380	AT1G78460	AT2G33220	AT1G79000	AT2G27200	AT1G79710	AT2G21240	AT1G78270	AT2G17200	AT1G78800		AT1G51645
AT2G32390	AT1G78550	AT2G33390	AT1G79010	AT2G27310	AT1G79830	AT2G21250	AT1G78280	AT2G17210	AT1G78830		AT1G51650
AT2G32400	AT1G78570	AT2G33470	AT1G79190	AT2G27460	AT1G79870	AT2G21350	AT1G78380	AT2G17220	AT1G78850		AT1G51660
AT2G32487	AT1G78600	AT2G33490	AT1G79210	AT2G27480	AT1G79930	AT2G21410	AT1G78410	AT2G17290	AT1G78870		AT1G51670
AT2G32520	AT1G78620	AT2G33630	AT1G79280	AT2G27600	AT1G79940	AT2G21460	AT1G78420	AT2G17380	AT1G78895		AT1G51710
AT2G32550	AT1G78660	AT2G33810	AT1G79340	AT2G27660	AT1G79990	AT2G21500	AT1G78460	AT2G17420	AT1G78900		AT1G51740
AT2G32560	AT1G78670	AT2G33830	AT1G79380	AT2G27730	AT1G80000	AT2G21520	AT1G78550	AT2G17440	AT1G78910		AT1G51760
AT2G32580	AT1G78780	AT2G33847	AT1G79400	AT2G27900	AT1G80010	AT2G21550	AT1G78600	AT2G17450	AT1G78920		AT1G51790
AT2G32650	AT1G78800	AT2G33990	AT1G79440	AT2G27920	AT1G80070	AT2G21620	AT1G78620	AT2G17520	AT1G78955		AT1G51800
AT2G32680	AT1G78830	AT2G34010	AT1G79450	AT2G28080	AT1G80110	AT2G21630	AT1G78660	AT2G17530	AT1G79000		AT1G51820
AT2G32730	AT1G78850	AT2G34250	AT1G79530	AT2G28120	AT1G80130	AT2G21660	AT1G78670	AT2G17560	AT1G79010		AT1G51850
AT2G32850	AT1G78870	AT2G34355	AT1G79550	AT2G28160	AT1G80160	AT2G21840	AT1G78780	AT2G17570	AT1G79080		AT1G51860
AT2G32900	AT1G78890	AT2G34420	AT1G79610	AT2G28360	AT1G80180	AT2G21850	AT1G78800	AT2G17705	AT1G79110		AT1G51890
AT2G32920	AT1G78895	AT2G34430	AT1G79670	AT2G28430	AT1G80210	AT2G21910	AT1G78830	AT2G17710	AT1G79190		AT1G51913
AT2G32970	AT1G78900	AT2G34470	AT1G79680	AT2G28630	AT1G80230	AT2G21950	AT1G78850	AT2G17720	AT1G79200		AT1G51920
AT2G33020	AT1G78910	AT2G34585	AT1G79690	AT2G28660	AT1G80290	AT2G22122	AT1G78870	AT2G17730	AT1G79210		AT1G51940
AT2G33040	AT1G78920	AT2G34840	AT1G79710	AT2G28720	AT1G80310	AT2G22300	AT1G78895	AT2G17740	AT1G79280		AT1G51980
AT2G33050	AT1G79010	AT2G34940	AT1G79750	AT2G28755	AT1G80360	AT2G22310	AT1G78910	AT2G17760	AT1G79340		AT1G52087
AT2G33120	AT1G79190	AT2G35010	AT1G79830	AT2G28830	AT1G80420	AT2G22425	AT1G78920	AT2G17790	AT1G79380		AT1G52155
AT2G33150	AT1G79210	AT2G35060	AT1G79930	AT2G28840	AT1G80440	AT2G22430	AT1G78955	AT2G17920	AT1G79400		AT1G52160
AT2G33370	AT1G79280	AT2G35110	AT1G79940	AT2G28890	AT1G80460	AT2G22480	AT1G79010	AT2G17930	AT1G79440		AT1G52200
AT2G33470	AT1G79340	AT2G35240	AT1G79990	AT2G28940	AT1G80500	AT2G22500	AT1G79080	AT2G17975	AT1G79450		AT1G52220
AT2G33490	AT1G79380	AT2G35320	AT1G80000	AT2G29020	AT1G80510	AT2G22570	AT1G79110	AT2G17980	AT1G79470		AT1G52230
AT2G33580	AT1G79400	AT2G35520	AT1G80070	AT2G29065	AT1G80590	AT2G22660	AT1G79190	AT2G18000	AT1G79530		AT1G52260
AT2G33630	AT1G79440	AT2G35590	AT1G80130	AT2G29070	AT1G80600	AT2G22690	AT1G79210	AT2G18110	AT1G79610		AT1G52270
AT2G33845	AT1G79450	AT2G35610	AT1G80160	AT2G29100	AT1G80610	AT2G22830	AT1G79280	AT2G18170	AT1G79670		AT1G52290
AT2G34010	AT1G79530	AT2G35680	AT1G80180	AT2G29110	AT1G80680	AT2G22840	AT1G79340	AT2G18280	AT1G79680		AT1G52315
AT2G34150	AT1G79550	AT2G35690	AT1G80190	AT2G29120	AT1G80820	AT2G22880	AT1G79360	AT2G18350	AT1G79690		AT1G52320
AT2G34250	AT1G79590	AT2G35790	AT1G80210	AT2G29340	AT1G80830	AT2G22980	AT1G79380	AT2G18410	AT1G79710		AT1G52347
AT2G34420	AT1G79610	AT2G35810	AT1G80230	AT2G29350	AT1G80840	AT2G23090	AT1G79390	AT2G18660	AT1G79830		AT1G52360
AT2G34430	AT1G79670	AT2G35980	AT1G80290	AT2G29400	AT1G80890	AT2G23170	AT1G79400	AT2G18670	AT1G79930		AT1G52370
AT2G34470	AT1G79680	AT2G36060	AT1G80310	AT2G29460	AT1G80910	AT2G23200	AT1G79450	AT2G18690	AT1G79940		AT1G52380
AT2G34480	AT1G79690	AT2G36170	AT1G80320	AT2G29470	AT1G80920	AT2G23270	AT1G79670	AT2G18750	AT1G79990		AT1G52420
AT2G34585	AT1G79710	AT2G36305	AT1G80360	AT2G29525	AT1G80950	AT2G23310	AT1G79680	AT2G18770	AT1G80000		AT1G52450
AT2G34620	AT1G79830	AT2G36320	AT1G80420	AT2G29640	AT1G80960	AT2G23320	AT1G79710	AT2G18840	AT1G80070		AT1G52500
AT2G34650	AT1G79870	AT2G36330	AT1G80440	AT2G29720	AT2G01029	AT2G23330	AT1G79830	AT2G19080	AT1G80110		AT1G52520
AT2G34840	AT1G79940	AT2G36360	AT1G80450	AT2G29740	AT2G01040	AT2G23450	AT1G79930	AT2G19110	AT1G80130		AT1G52540
AT2G34940	AT1G79990	AT2G36400	AT1G80460	AT2G29960	AT2G01060	AT2G23680	AT1G79940	AT2G19120	AT1G80160		AT1G52570
AT2G35070	AT1G80110	AT2G36420	AT1G80510	AT2G29990	AT2G01130	AT2G23810	AT1G79990	AT2G19130	AT1G80180		AT1G52600
AT2G35110	AT1G80160	AT2G36470	AT1G80590	AT2G30110	AT2G01180	AT2G23940	AT1G80000	AT2G19160	AT1G80190		AT1G52620
AT2G35240	AT1G80180	AT2G36500	AT1G80600	AT2G30250	AT2G01220	AT2G24160	AT1G80070	AT2G19180	AT1G80210		AT1G52710
AT2G35320	AT1G80210	AT2G36680	AT1G80610	AT2G30260	AT2G01270	AT2G24180	AT1G80110	AT2G19190	AT1G80230		AT1G52720
AT2G35520	AT1G80230	AT2G36690	AT1G80650	AT2G30440	AT2G01340	AT2G24200	AT1G80130	AT2G19250	AT1G80290		AT1G52780
AT2G35610	AT1G80290	AT2G36792	AT1G80680	AT2G30530	AT2G01350	AT2G24240	AT1G80160	AT2G19350	AT1G80420		AT1G52800
AT2G35635	AT1G80310	AT2G37110	AT1G80820	AT2G30550	AT2G01410	AT2G24260	AT1G80180	AT2G19390	AT1G80440		AT1G52810
AT2G35780	AT1G80320	AT2G37120	AT1G80830	AT2G30570	AT2G01440	AT2G24290	AT1G80190	AT2G19470	AT1G80460		AT1G52825
AT2G35790	AT1G80360	AT2G37150	AT1G80840	AT2G30620	AT2G01450	AT2G24360	AT1G80210	AT2G19710	AT1G80500		AT1G52850
AT2G35810	AT1G80400	AT2G37160	AT1G80850	AT2G30710	AT2G01460	AT2G24600	AT1G80230	AT2G19730	AT1G80510		AT1G52880
AT2G35930	AT1G80420	AT2G37320	AT1G80890	AT2G30720	AT2G01470	AT2G24850	AT1G80290	AT2G19740	AT1G80570		AT1G52890
AT2G35980	AT1G80440	AT2G37430	AT1G80900	AT2G30770	AT2G01490	AT2G24860	AT1G80310	AT2G19790	AT1G80590		AT1G52910
AT2G36060	AT1G80450	AT2G37520	AT1G80910	AT2G30860	AT2G01540	AT2G25000	AT1G80420	AT2G19810	AT1G80600		AT1G53030
AT2G36080	AT1G80460	AT2G37660	AT1G80920	AT2G30870	AT2G01600	AT2G25070	AT1G80440	AT2G19830	AT1G80610		AT1G53100
AT2G36170	AT1G80510	AT2G37678	AT1G80930	AT2G30880	AT2G01610	AT2G25110	AT1G80460	AT2G19950	AT1G80650		AT1G53110
AT2G36310	AT1G80590	AT2G37690	AT1G80950	AT2G30980	AT2G01650	AT2G25190	AT1G80500	AT2G20010	AT1G80720		AT1G53160
AT2G36320	AT1G80600	AT2G37710	AT1G80960	AT2G31020	AT2G01670	AT2G25200	AT1G80510	AT2G20060	AT1G80830		AT1G53165
AT2G36330	AT1G80610	AT2G37820	AT2G01008	AT2G31060	AT2G01680	AT2G25260	AT1G80600	AT2G20110	AT1G80840		AT1G53170
AT2G36360	AT1G80650	AT2G37840	AT2G01029	AT2G31090	AT2G01720	AT2G25280	AT1G80650	AT2G20142	AT1G80850		AT1G53180
AT2G36370	AT1G80670	AT2G37920	AT2G01060	AT2G31200	AT2G01735	AT2G25300	AT1G80830	AT2G20150	AT1G80890		AT1G53200
AT2G36380	AT1G80820	AT2G37940	AT2G01100	AT2G31230	AT2G01980	AT2G25310	AT1G80840	AT2G20320	AT1G80910		AT1G53280
AT2G36400	AT1G80830	AT2G37950	AT2G01130	AT2G31260	AT2G02010	AT2G25320	AT1G80850	AT2G20390	AT1G80920		AT1G53310
AT2G36420	AT1G80840	AT2G37975	AT2G01140	AT2G31300	AT2G02040	AT2G25350	AT1G80890	AT2G20420	AT1G80950		AT1G53320
AT2G36460	AT1G80890	AT2G37980	AT2G01180	AT2G31350	AT2G02050	AT2G25440	AT1G80900	AT2G20530	AT1G80960		AT1G53330
AT2G36530	AT1G80900	AT2G38000	AT2G01190	AT2G31490	AT2G02110	AT2G25470	AT1G80910	AT2G20580	AT2G01010		AT1G53340
AT2G36680	AT1G80910	AT2G38010	AT2G01220	AT2G31585	AT2G02148	AT2G25490	AT1G80920	AT2G20630	AT2G01029		AT1G53350
AT2G36690	AT1G80920	AT2G38020	AT2G01340	AT2G31740	AT2G02220	AT2G25510	AT1G80950	AT2G20650	AT2G01060		AT1G53390
AT2G36770	AT1G80950	AT2G38025	AT2G01350	AT2G31800	AT2G02350	AT2G25520	AT1G80960	AT2G20740	AT2G01100		AT1G53400
AT2G36780	AT1G80960	AT2G38130	AT2G01410	AT2G31810	AT2G02360	AT2G25590	AT1G80980	AT2G20760	AT2G01130		AT1G53430
AT2G36792	AT2G01020	AT2G38290	AT2G01440	AT2G31865	AT2G02370	AT2G25730	AT2G01060	AT2G20770	AT2G01140		AT1G53440
AT2G36800	AT2G01060	AT2G38410	AT2G01450	AT2G31870	AT2G02390	AT2G25735	AT2G01130	AT2G20780	AT2G01180		AT1G53480
AT2G36900	AT2G01100	AT2G38470	AT2G01460	AT2G31880	AT2G02510	AT2G25760	AT2G01180	AT2G20790	AT2G01190		AT1G53540
AT2G36970	AT2G01130	AT2G38550	AT2G01470	AT2G31955	AT2G02560	AT2G25770	AT2G01340	AT2G20820	AT2G01220		AT1G53560
AT2G37110	AT2G01140	AT2G38670	AT2G01490	AT2G31990	AT2G02590	AT2G25790	AT2G01350	AT2G20850	AT2G01270		AT1G53570
AT2G37120	AT2G01180	AT2G38860	AT2G01540	AT2G32030	AT2G02710	AT2G25850	AT2G01410	AT2G20900	AT2G01340		AT1G53580
AT2G37130	AT2G01190	AT2G38960	AT2G01600	AT2G32090	AT2G02730	AT2G25910	AT2G01440	AT2G20930	AT2G01350		AT1G53590
AT2G37160	AT2G01350	AT2G38970	AT2G01650	AT2G32140	AT2G02810	AT2G25930	AT2G01450	AT2G20960	AT2G01450		AT1G53625
AT2G37430	AT2G01410	AT2G39080	AT2G01670	AT2G32160	AT2G02870	AT2G26010	AT2G01460	AT2G21160	AT2G01460		AT1G53650
AT2G37460	AT2G01420	AT2G39090	AT2G01680	AT2G32200	AT2G02930	AT2G26020	AT2G01470	AT2G21188	AT2G01470		AT1G53700
AT2G37470	AT2G01440	AT2G39100	AT2G01720	AT2G32210	AT2G02960	AT2G26030	AT2G01490	AT2G21230	AT2G01490		AT1G53710
AT2G37620	AT2G01450	AT2G39200	AT2G01735	AT2G32380	AT2G02970	AT2G26070	AT2G01540	AT2G21240	AT2G01540		AT1G53720
AT2G37660	AT2G01460	AT2G39210	AT2G01760	AT2G32390	AT2G03120	AT2G26190	AT2G01650	AT2G21250	AT2G01650		AT1G53750
AT2G37678	AT2G01470	AT2G39230	AT2G01840	AT2G32400	AT2G03220	AT2G26200	AT2G01670	AT2G21350	AT2G01670		AT1G53760
AT2G37680	AT2G01490	AT2G39270	AT2G01980	AT2G32520	AT2G03380	AT2G26230	AT2G01680	AT2G21390	AT2G01680		AT1G53770
AT2G37710	AT2G01540	AT2G39280	AT2G02010	AT2G32680	AT2G03410	AT2G26240	AT2G01720	AT2G21410	AT2G01720		AT1G53810
AT2G37720	AT2G01600	AT2G39400	AT2G02040	AT2G32700	AT2G03430	AT2G26390	AT2G01735	AT2G21500	AT2G01860		AT1G53830
AT2G37790	AT2G01650	AT2G39480	AT2G02050	AT2G32730	AT2G03450	AT2G26400	AT2G01980	AT2G21520	AT2G01980		AT1G53850
AT2G37920	AT2G01670	AT2G39530	AT2G02180	AT2G32800	AT2G03470	AT2G26440	AT2G02010	AT2G21550	AT2G02010		AT1G53860
AT2G37940	AT2G01680	AT2G39550	AT2G02220	AT2G32850	AT2G03505	AT2G26510	AT2G02040	AT2G21620	AT2G02040		AT1G53887
AT2G37950	AT2G01720	AT2G39630	AT2G02350	AT2G32880	AT2G03510	AT2G26530	AT2G02148	AT2G21630	AT2G02050		AT1G53910
AT2G37975	AT2G01735	AT2G39660	AT2G02360	AT2G32900	AT2G03530	AT2G26560	AT2G02180	AT2G21660	AT2G02110		AT1G53920
AT2G37980	AT2G01980	AT2G39705	AT2G02370	AT2G32920	AT2G03540	AT2G26600	AT2G02220	AT2G21850	AT2G02148		AT1G53980
AT2G38000	AT2G02010	AT2G39740	AT2G02390	AT2G33040	AT2G03620	AT2G26650	AT2G02340	AT2G21870	AT2G02180		AT1G53990
AT2G38010	AT2G02040	AT2G39780	AT2G02410	AT2G33051	AT2G03680	AT2G26780	AT2G02350	AT2G21900	AT2G02220		AT1G54000
AT2G38020	AT2G02050	AT2G39900	AT2G02510	AT2G33080	AT2G03760	AT2G26810	AT2G02360	AT2G21910	AT2G02360		AT1G54010
AT2G38130	AT2G02180	AT2G39910	AT2G02560	AT2G33110	AT2G03800	AT2G26890	AT2G02370	AT2G21950	AT2G02370		AT1G54030
AT2G38170	AT2G02220	AT2G39920	AT2G02710	AT2G33120	AT2G04040	AT2G26970	AT2G02390	AT2G22010	AT2G02390		AT1G54090
AT2G38260	AT2G02350	AT2G39960	AT2G02730	AT2G33150	AT2G04050	AT2G26975	AT2G02410	AT2G22122	AT2G02560		AT1G54100
AT2G38270	AT2G02360	AT2G39980	AT2G02800	AT2G33170	AT2G04070	AT2G27020	AT2G02510	AT2G22300	AT2G02710		AT1G54115
AT2G38290	AT2G02370	AT2G40000	AT2G02810	AT2G33220	AT2G04080	AT2G27030	AT2G02560	AT2G22310	AT2G02730		AT1G54130
AT2G38310	AT2G02390	AT2G40095	AT2G02870	AT2G33390	AT2G04100	AT2G27150	AT2G02710	AT2G22370	AT2G02760		AT1G54150
AT2G38470	AT2G02480	AT2G40110	AT2G02930	AT2G33470	AT2G04160	AT2G27170	AT2G02730	AT2G22425	AT2G02800		AT1G54160
AT2G38530	AT2G02510	AT2G40120	AT2G02960	AT2G33490	AT2G04305	AT2G27200	AT2G02760	AT2G22430	AT2G02810		AT1G54170
AT2G38580	AT2G02560	AT2G40140	AT2G02970	AT2G33580	AT2G04340	AT2G27310	AT2G02810	AT2G22480	AT2G02870		AT1G54210
AT2G38670	AT2G02710	AT2G40180	AT2G03110	AT2G33585	AT2G04350	AT2G27600	AT2G02870	AT2G22500	AT2G02930		AT1G54250
AT2G38710	AT2G02730	AT2G40410	AT2G03120	AT2G33630	AT2G04400	AT2G27660	AT2G02930	AT2G22530	AT2G02960		AT1G54320
AT2G38790	AT2G02760	AT2G40420	AT2G03220	AT2G33710	AT2G04430	AT2G27730	AT2G02960	AT2G22570	AT2G02970		AT1G54340
AT2G38820	AT2G02810	AT2G40600	AT2G03410	AT2G33830	AT2G04450	AT2G27830	AT2G02970	AT2G22660	AT2G03120		AT1G54360
AT2G38860	AT2G02870	AT2G40610	AT2G03430	AT2G34250	AT2G04490	AT2G27900	AT2G03120	AT2G22830	AT2G03220		AT1G54370
AT2G38870	AT2G02930	AT2G40620	AT2G03450	AT2G34420	AT2G04495	AT2G27920	AT2G03220	AT2G22910	AT2G03340		AT1G54390
AT2G38960	AT2G02960	AT2G40740	AT2G03505	AT2G34470	AT2G04515	AT2G28110	AT2G03410	AT2G22970	AT2G03410		AT1G54410
AT2G38970	AT2G02970	AT2G40750	AT2G03510	AT2G34500	AT2G04550	AT2G28120	AT2G03430	AT2G23090	AT2G03430		AT1G54440
AT2G39080	AT2G03120	AT2G40765	AT2G03530	AT2G34585	AT2G04620	AT2G28160	AT2G03450	AT2G23170	AT2G03450		AT1G54460
AT2G39100	AT2G03220	AT2G40815	AT2G03540	AT2G34650	AT2G04650	AT2G28200	AT2G03470	AT2G23200	AT2G03470		AT1G54490
AT2G39200	AT2G03310	AT2G40840	AT2G03590	AT2G34690	AT2G04690	AT2G28230	AT2G03505	AT2G23270	AT2G03505		AT1G54510
AT2G39210	AT2G03410	AT2G40880	AT2G03620	AT2G34840	AT2G04740	AT2G28290	AT2G03510	AT2G23310	AT2G03510		AT1G54520
AT2G39270	AT2G03430	AT2G40940	AT2G03680	AT2G34940	AT2G04852	AT2G28360	AT2G03530	AT2G23320	AT2G03530		AT1G54570
AT2G39380	AT2G03440	AT2G40970	AT2G03690	AT2G35060	AT2G04860	AT2G28400	AT2G03540	AT2G23330	AT2G03540		AT1G54575
AT2G39400	AT2G03450	AT2G41090	AT2G03760	AT2G35070	AT2G04865	AT2G28430	AT2G03590	AT2G23450	AT2G03590		AT1G54580
AT2G39410	AT2G03505	AT2G41100	AT2G04040	AT2G35110	AT2G04880	AT2G28630	AT2G03620	AT2G23680	AT2G03620		AT1G54610
AT2G39460	AT2G03510	AT2G41180	AT2G04070	AT2G35240	AT2G04900	AT2G28660	AT2G03680	AT2G23770	AT2G03640		AT1G54630
AT2G39518	AT2G03530	AT2G41220	AT2G04080	AT2G35320	AT2G05120	AT2G28720	AT2G03690	AT2G23810	AT2G03680		AT1G54650
AT2G39530	AT2G03540	AT2G41420	AT2G04100	AT2G35520	AT2G05170	AT2G28755	AT2G03760	AT2G23890	AT2G03760		AT1G54660
AT2G39550	AT2G03590	AT2G41430	AT2G04160	AT2G35590	AT2G05240	AT2G28830	AT2G03800	AT2G23940	AT2G03800		AT1G54680
AT2G39650	AT2G03620	AT2G41490	AT2G04305	AT2G35610	AT2G05260	AT2G28840	AT2G03890	AT2G24160	AT2G03830		AT1G54710
AT2G39660	AT2G03680	AT2G41530	AT2G04340	AT2G35790	AT2G05320	AT2G28890	AT2G03980	AT2G24165	AT2G03870		AT1G54730
AT2G39705	AT2G03690	AT2G41560	AT2G04350	AT2G35810	AT2G05380	AT2G28930	AT2G04040	AT2G24180	AT2G03890		AT1G54740
AT2G39740	AT2G03760	AT2G41660	AT2G04400	AT2G35930	AT2G05520	AT2G28940	AT2G04050	AT2G24200	AT2G04040		AT1G54920
AT2G39750	AT2G03800	AT2G41710	AT2G04430	AT2G35980	AT2G05710	AT2G29020	AT2G04070	AT2G24240	AT2G04070		AT1G54923
AT2G39780	AT2G03890	AT2G41760	AT2G04450	AT2G36060	AT2G05840	AT2G29065	AT2G04080	AT2G24360	AT2G04080		AT1G54926
AT2G39900	AT2G04040	AT2G41835	AT2G04490	AT2G36170	AT2G05940	AT2G29070	AT2G04100	AT2G24390	AT2G04100		AT1G54960
AT2G39910	AT2G04050	AT2G41880	AT2G04495	AT2G36220	AT2G06025	AT2G29100	AT2G04110	AT2G24600	AT2G04305		AT1G54990
AT2G39920	AT2G04070	AT2G42160	AT2G04515	AT2G36320	AT2G06050	AT2G29120	AT2G04305	AT2G24645	AT2G04340		AT1G55000
AT2G39930	AT2G04080	AT2G42210	AT2G04530	AT2G36330	AT2G06230	AT2G29340	AT2G04340	AT2G24765	AT2G04350		AT1G55020
AT2G39960	AT2G04100	AT2G42310	AT2G04550	AT2G36360	AT2G06255	AT2G29350	AT2G04350	AT2G24850	AT2G04400		AT1G55050
AT2G39980	AT2G04110	AT2G42390	AT2G04620	AT2G36380	AT2G06510	AT2G29370	AT2G04400	AT2G24860	AT2G04430		AT1G55080
AT2G40000	AT2G04305	AT2G42600	AT2G04650	AT2G36400	AT2G06530	AT2G29400	AT2G04430	AT2G24890	AT2G04450		AT1G55090
AT2G40095	AT2G04400	AT2G42670	AT2G04690	AT2G36420	AT2G06740	AT2G29460	AT2G04450	AT2G25000	AT2G04490		AT1G55110
AT2G40110	AT2G04430	AT2G42680	AT2G04852	AT2G36430	AT2G06930	AT2G29470	AT2G04490	AT2G25070	AT2G04495		AT1G55120
AT2G40140	AT2G04450	AT2G42790	AT2G04860	AT2G36460	AT2G06980	AT2G29640	AT2G04495	AT2G25090	AT2G04515		AT1G55130
AT2G40190	AT2G04490	AT2G42870	AT2G04900	AT2G36470	AT2G07180	AT2G29720	AT2G04515	AT2G25110	AT2G04520		AT1G55170
AT2G40205	AT2G04495	AT2G42890	AT2G05160	AT2G36580	AT2G07360	AT2G29740	AT2G04520	AT2G25190	AT2G04550		AT1G55210
AT2G40270	AT2G04515	AT2G42920	AT2G05170	AT2G36670	AT2G07725	AT2G29990	AT2G04530	AT2G25200	AT2G04620		AT1G55230
AT2G40330	AT2G04520	AT2G42980	AT2G05240	AT2G36680	AT2G07750	AT2G30140	AT2G04650	AT2G25280	AT2G04650		AT1G55250
AT2G40410	AT2G04550	AT2G43000	AT2G05260	AT2G36690	AT2G07811	AT2G30250	AT2G04660	AT2G25300	AT2G04690		AT1G55265
AT2G40420	AT2G04620	AT2G43080	AT2G05320	AT2G36770	AT2G09960	AT2G30260	AT2G04690	AT2G25310	AT2G04740		AT1G55280
AT2G40490	AT2G04650	AT2G43090	AT2G05380	AT2G36800	AT2G10040	AT2G30270	AT2G04852	AT2G25350	AT2G04852		AT1G55310
AT2G40510	AT2G04690	AT2G43130	AT2G05520	AT2G36900	AT2G10950	AT2G30440	AT2G04860	AT2G25470	AT2G04860		AT1G55325
AT2G40600	AT2G04860	AT2G43140	AT2G05710	AT2G37035	AT2G11140	AT2G30530	AT2G04890	AT2G25510	AT2G04900		AT1G55365
AT2G40610	AT2G04880	AT2G43210	AT2G05840	AT2G37110	AT2G11290	AT2G30590	AT2G04900	AT2G25520	AT2G05170		AT1G55420
AT2G40620	AT2G04900	AT2G43350	AT2G05940	AT2G37120	AT2G11520	AT2G30620	AT2G05170	AT2G25590	AT2G05240		AT1G55430
AT2G40640	AT2G05160	AT2G43460	AT2G06025	AT2G37130	AT2G11670	AT2G30710	AT2G05260	AT2G25730	AT2G05260		AT1G55450
AT2G40740	AT2G05170	AT2G43540	AT2G06095	AT2G37150	AT2G12490	AT2G30720	AT2G05320	AT2G25735	AT2G05320		AT1G55475
AT2G40750	AT2G05260	AT2G43590	AT2G06255	AT2G37160	AT2G12550	AT2G30770	AT2G05380	AT2G25850	AT2G05380		AT1G55510
AT2G40765	AT2G05320	AT2G43640	AT2G06490	AT2G37430	AT2G13130	AT2G30860	AT2G05518	AT2G25910	AT2G05518		AT1G55530
AT2G40840	AT2G05380	AT2G43680	AT2G06510	AT2G37470	AT2G13170	AT2G30870	AT2G05520	AT2G25930	AT2G05520		AT1G55540
AT2G40860	AT2G05518	AT2G43760	AT2G06530	AT2G37520	AT2G13260	AT2G30910	AT2G05710	AT2G26010	AT2G05630		AT1G55590
AT2G40880	AT2G05520	AT2G43780	AT2G06740	AT2G37678	AT2G13560	AT2G30942	AT2G05840	AT2G26020	AT2G05710		AT1G55610
AT2G40940	AT2G05630	AT2G43820	AT2G06790	AT2G37680	AT2G13650	AT2G30945	AT2G05940	AT2G26190	AT2G05840		AT1G55680
AT2G40970	AT2G05710	AT2G43850	AT2G06930	AT2G37710	AT2G13790	AT2G31020	AT2G06025	AT2G26200	AT2G05940		AT1G55730
AT2G41090	AT2G05840	AT2G43940	AT2G07050	AT2G37920	AT2G13800	AT2G31090	AT2G06050	AT2G26210	AT2G06025		AT1G55750
AT2G41100	AT2G05940	AT2G43970	AT2G07180	AT2G37940	AT2G13810	AT2G31230	AT2G06255	AT2G26230	AT2G06095		AT1G55760
AT2G41110	AT2G06025	AT2G43980	AT2G07360	AT2G37950	AT2G14040	AT2G31260	AT2G06510	AT2G26240	AT2G06490		AT1G55790
AT2G41180	AT2G06050	AT2G44065	AT2G07750	AT2G37975	AT2G14080	AT2G31300	AT2G06530	AT2G26260	AT2G06530		AT1G55810
AT2G41220	AT2G06255	AT2G44080	AT2G11140	AT2G37980	AT2G14120	AT2G31350	AT2G07180	AT2G26300	AT2G06740		AT1G55830
AT2G41380	AT2G06510	AT2G44100	AT2G11290	AT2G38000	AT2G14170	AT2G31510	AT2G07360	AT2G26390	AT2G06790		AT1G55840
AT2G41410	AT2G06530	AT2G44130	AT2G11520	AT2G38010	AT2G14255	AT2G31585	AT2G11140	AT2G26400	AT2G07180		AT1G55850
AT2G41420	AT2G07180	AT2G44140	AT2G11670	AT2G38020	AT2G14260	AT2G31800	AT2G11520	AT2G26430	AT2G07240		AT1G55860
AT2G41430	AT2G07360	AT2G44180	AT2G12490	AT2G38130	AT2G14290	AT2G31810	AT2G11880	AT2G26440	AT2G07360		AT1G55880
AT2G41490	AT2G07671	AT2G44280	AT2G12550	AT2G38260	AT2G14560	AT2G31820	AT2G12210	AT2G26510	AT2G07741		AT1G55900
AT2G41510	AT2G10950	AT2G44290	AT2G13170	AT2G38290	AT2G14610	AT2G31865	AT2G12490	AT2G26560	AT2G07750		AT1G55910
AT2G41530	AT2G11140	AT2G44360	AT2G13370	AT2G38310	AT2G14620	AT2G31870	AT2G12550	AT2G26600	AT2G11140		AT1G55920
AT2G41700	AT2G11520	AT2G44370	AT2G13560	AT2G38410	AT2G14680	AT2G31880	AT2G13560	AT2G26650	AT2G11290		AT1G55980
AT2G41705	AT2G12490	AT2G44410	AT2G13650	AT2G38470	AT2G14720	AT2G31945	AT2G13600	AT2G26670	AT2G11500		AT1G56010
AT2G41835	AT2G12550	AT2G44420	AT2G13790	AT2G38710	AT2G14740	AT2G31955	AT2G13650	AT2G26780	AT2G11520		AT1G56020
AT2G41870	AT2G13130	AT2G44480	AT2G13800	AT2G38790	AT2G14830	AT2G31990	AT2G13790	AT2G26810	AT2G11670		AT1G56060
AT2G41880	AT2G13560	AT2G44490	AT2G13810	AT2G38860	AT2G14835	AT2G32000	AT2G13800	AT2G26890	AT2G12260		AT1G56070
AT2G42160	AT2G13650	AT2G44530	AT2G14080	AT2G38870	AT2G14850	AT2G32030	AT2G13810	AT2G26970	AT2G12490		AT1G56090
AT2G42190	AT2G13790	AT2G44660	AT2G14120	AT2G38960	AT2G14878	AT2G32080	AT2G14080	AT2G26975	AT2G12550		AT1G56110
AT2G42210	AT2G13800	AT2G44760	AT2G14255	AT2G38970	AT2G15040	AT2G32140	AT2G14110	AT2G27020	AT2G13100		AT1G56120
AT2G42230	AT2G13810	AT2G44850	AT2G14290	AT2G39100	AT2G15042	AT2G32160	AT2G14120	AT2G27030	AT2G13130		AT1G56130
AT2G42310	AT2G14080	AT2G44980	AT2G14560	AT2G39200	AT2G15080	AT2G32190	AT2G14260	AT2G27090	AT2G13170		AT1G56140
AT2G42320	AT2G14110	AT2G45010	AT2G14610	AT2G39210	AT2G15230	AT2G32200	AT2G14560	AT2G27150	AT2G13250		AT1G56145
AT2G42360	AT2G14120	AT2G45070	AT2G14620	AT2G39230	AT2G15240	AT2G32240	AT2G14610	AT2G27170	AT2G13560		AT1G56150
AT2G42390	AT2G14170	AT2G45140	AT2G14680	AT2G39270	AT2G15390	AT2G32380	AT2G14680	AT2G27200	AT2G13650		AT1G56165
AT2G42480	AT2G14290	AT2G45170	AT2G14720	AT2G39380	AT2G15480	AT2G32390	AT2G14720	AT2G27310	AT2G13790		AT1G56190
AT2G42490	AT2G14560	AT2G45200	AT2G14740	AT2G39400	AT2G15490	AT2G32520	AT2G14740	AT2G27460	AT2G13800		AT1G56220
AT2G42590	AT2G14610	AT2G45240	AT2G14835	AT2G39480	AT2G15570	AT2G32660	AT2G14835	AT2G27600	AT2G13810		AT1G56230
AT2G42600	AT2G14620	AT2G45500	AT2G14878	AT2G39518	AT2G15760	AT2G32680	AT2G14878	AT2G27660	AT2G14080		AT1G56240
AT2G42610	AT2G14680	AT2G45510	AT2G15040	AT2G39530	AT2G15860	AT2G32700	AT2G15040	AT2G27730	AT2G14110		AT1G56250
AT2G42640	AT2G14720	AT2G45660	AT2G15042	AT2G39550	AT2G15890	AT2G32730	AT2G15042	AT2G27900	AT2G14120		AT1G56280
AT2G42680	AT2G14835	AT2G45760	AT2G15080	AT2G39630	AT2G15900	AT2G32830	AT2G15080	AT2G27920	AT2G14255		AT1G56290
AT2G42700	AT2G14878	AT2G45790	AT2G15230	AT2G39660	AT2G16060	AT2G32900	AT2G15220	AT2G28120	AT2G14560		AT1G56300
AT2G42790	AT2G15040	AT2G45810	AT2G15240	AT2G39740	AT2G16405	AT2G33050	AT2G15230	AT2G28160	AT2G14610		AT1G56330
AT2G42890	AT2G15042	AT2G45850	AT2G15390	AT2G39780	AT2G16430	AT2G33051	AT2G15240	AT2G28290	AT2G14620		AT1G56340
AT2G42960	AT2G15080	AT2G45910	AT2G15480	AT2G39920	AT2G16460	AT2G33080	AT2G15390	AT2G28360	AT2G14680		AT1G56423
AT2G42980	AT2G15220	AT2G45980	AT2G15490	AT2G39960	AT2G16530	AT2G33120	AT2G15480	AT2G28430	AT2G14720		AT1G56440
AT2G43000	AT2G15230	AT2G46060	AT2G15570	AT2G40030	AT2G16595	AT2G33150	AT2G15490	AT2G28500	AT2G14740		AT1G56450
AT2G43070	AT2G15240	AT2G46140	AT2G15760	AT2G40095	AT2G16600	AT2G33170	AT2G15570	AT2G28630	AT2G14835		AT1G56460
AT2G43090	AT2G15390	AT2G46220	AT2G15860	AT2G40110	AT2G16640	AT2G33290	AT2G15630	AT2G28660	AT2G14850		AT1G56470
AT2G43140	AT2G15480	AT2G46260	AT2G15880	AT2G40113	AT2G16680	AT2G33470	AT2G15760	AT2G28720	AT2G14878		AT1G56510
AT2G43150	AT2G15490	AT2G46280	AT2G15890	AT2G40140	AT2G16710	AT2G33510	AT2G15860	AT2G28755	AT2G15040		AT1G56520
AT2G43350	AT2G15570	AT2G46330	AT2G15900	AT2G40180	AT2G16720	AT2G33630	AT2G15880	AT2G28830	AT2G15042		AT1G56540
AT2G43375	AT2G15760	AT2G46430	AT2G16050	AT2G40190	AT2G16870	AT2G33710	AT2G15890	AT2G28840	AT2G15080		AT1G56550
AT2G43400	AT2G15860	AT2G46440	AT2G16060	AT2G40270	AT2G16900	AT2G33740	AT2G15900	AT2G28890	AT2G15230		AT1G56590
AT2G43460	AT2G15900	AT2G46470	AT2G16250	AT2G40330	AT2G16920	AT2G33830	AT2G16060	AT2G28940	AT2G15240		AT1G56600
AT2G43540	AT2G16060	AT2G46490	AT2G16310	AT2G40410	AT2G16950	AT2G34250	AT2G16380	AT2G29020	AT2G15390		AT1G56610
AT2G43570	AT2G16405	AT2G46505	AT2G16370	AT2G40420	AT2G17030	AT2G34470	AT2G16405	AT2G29065	AT2G15480		AT1G56650
AT2G43590	AT2G16430	AT2G46540	AT2G16380	AT2G40510	AT2G17040	AT2G34585	AT2G16430	AT2G29070	AT2G15490		AT1G56700
AT2G43620	AT2G16530	AT2G46550	AT2G16405	AT2G40600	AT2G17110	AT2G34690	AT2G16530	AT2G29100	AT2G15570		AT1G56710
AT2G43640	AT2G16595	AT2G46610	AT2G16430	AT2G40610	AT2G17115	AT2G34840	AT2G16595	AT2G29110	AT2G15760		AT1G57540
AT2G43760	AT2G16600	AT2G46620	AT2G16485	AT2G40620	AT2G17120	AT2G34940	AT2G16600	AT2G29120	AT2G15860		AT1G57560
AT2G43820	AT2G16660	AT2G46900	AT2G16510	AT2G40740	AT2G17130	AT2G35060	AT2G16640	AT2G29340	AT2G15890		AT1G57590
AT2G43850	AT2G16710	AT2G46940	AT2G16530	AT2G40750	AT2G17190	AT2G35110	AT2G16650	AT2G29400	AT2G15900		AT1G57600
AT2G43870	AT2G16740	AT2G47000	AT2G16595	AT2G40765	AT2G17200	AT2G35320	AT2G16660	AT2G29460	AT2G16050		AT1G57620
AT2G43940	AT2G16790	AT2G47130	AT2G16600	AT2G40810	AT2G17220	AT2G35520	AT2G16710	AT2G29525	AT2G16060		AT1G57630
AT2G43970	AT2G16870	AT2G47140	AT2G16640	AT2G40840	AT2G17290	AT2G35590	AT2G16720	AT2G29640	AT2G16310		AT1G57650
AT2G43980	AT2G16900	AT2G47170	AT2G16710	AT2G40880	AT2G17380	AT2G35610	AT2G16790	AT2G29720	AT2G16405		AT1G57700
AT2G44060	AT2G16920	AT2G47210	AT2G16720	AT2G40940	AT2G17390	AT2G35650	AT2G16870	AT2G29740	AT2G16420		AT1G57765
AT2G44080	AT2G16930	AT2G47320	AT2G16790	AT2G41090	AT2G17420	AT2G35680	AT2G16900	AT2G29900	AT2G16430		AT1G57790
AT2G44100	AT2G16950	AT2G47380	AT2G16870	AT2G41100	AT2G17440	AT2G35690	AT2G16920	AT2G29960	AT2G16530		AT1G57870
AT2G44140	AT2G17040	AT2G47470	AT2G16900	AT2G41110	AT2G17500	AT2G35810	AT2G16930	AT2G29990	AT2G16595		AT1G57943
AT2G44180	AT2G17110	AT2G47510	AT2G16920	AT2G41180	AT2G17520	AT2G35900	AT2G16950	AT2G30050	AT2G16600		AT1G57980
AT2G44210	AT2G17120	AT2G47640	AT2G16930	AT2G41220	AT2G17530	AT2G35910	AT2G17040	AT2G30140	AT2G16680		AT1G57990
AT2G44280	AT2G17130	AT2G47650	AT2G16950	AT2G41342	AT2G17570	AT2G35930	AT2G17050	AT2G30250	AT2G16690		AT1G58025
AT2G44350	AT2G17190	AT2G47680	AT2G17040	AT2G41380	AT2G17705	AT2G35980	AT2G17060	AT2G30260	AT2G16700		AT1G58030
AT2G44360	AT2G17200	AT2G47690	AT2G17110	AT2G41410	AT2G17710	AT2G36060	AT2G17110	AT2G30270	AT2G16710		AT1G58060
AT2G44370	AT2G17220	AT2G47700	AT2G17120	AT2G41420	AT2G17720	AT2G36220	AT2G17120	AT2G30424	AT2G16720		AT1G58110
AT2G44380	AT2G17290	AT2G47730	AT2G17130	AT2G41430	AT2G17730	AT2G36240	AT2G17130	AT2G30440	AT2G16790		AT1G58180
AT2G44383	AT2G17380	AT2G47760	AT2G17190	AT2G41490	AT2G17740	AT2G36310	AT2G17190	AT2G30530	AT2G16870		AT1G58190
AT2G44480	AT2G17420	AT2G47960	AT2G17200	AT2G41530	AT2G17760	AT2G36320	AT2G17200	AT2G30550	AT2G16900		AT1G58200
AT2G44490	AT2G17450	AT2G48000	AT2G17220	AT2G41640	AT2G17790	AT2G36330	AT2G17220	AT2G30590	AT2G16920		AT1G58220
AT2G44500	AT2G17500	AT2G48020	AT2G17290	AT2G41700	AT2G17920	AT2G36360	AT2G17290	AT2G30620	AT2G16930		AT1G58225
AT2G44520	AT2G17520	AT2G48030	AT2G17380	AT2G41730	AT2G17930	AT2G36380	AT2G17380	AT2G30710	AT2G16950		AT1G58230
AT2G44610	AT2G17560	AT3G01050	AT2G17390	AT2G41760	AT2G17975	AT2G36400	AT2G17420	AT2G30770	AT2G17040		AT1G58235
AT2G44660	AT2G17570	AT3G01080	AT2G17420	AT2G41780	AT2G17980	AT2G36420	AT2G17440	AT2G30860	AT2G17110		AT1G58250
AT2G44740	AT2G17700	AT3G01090	AT2G17450	AT2G41790	AT2G17990	AT2G36460	AT2G17520	AT2G30870	AT2G17120		AT1G58300
AT2G44760	AT2G17705	AT3G01130	AT2G17520	AT2G41835	AT2G18000	AT2G36470	AT2G17525	AT2G30880	AT2G17130		AT1G58340
AT2G44980	AT2G17710	AT3G01170	AT2G17530	AT2G41880	AT2G18170	AT2G36500	AT2G17530	AT2G30910	AT2G17190		AT1G58350
AT2G45010	AT2G17720	AT3G01290	AT2G17560	AT2G42160	AT2G18250	AT2G36580	AT2G17560	AT2G30942	AT2G17200		AT1G58360
AT2G45070	AT2G17740	AT3G01310	AT2G17570	AT2G42210	AT2G18280	AT2G36670	AT2G17570	AT2G31020	AT2G17220		AT1G58380
AT2G45140	AT2G17760	AT3G01360	AT2G17705	AT2G42360	AT2G18330	AT2G36680	AT2G17705	AT2G31060	AT2G17290		AT1G58400
AT2G45170	AT2G17790	AT3G01450	AT2G17710	AT2G42390	AT2G18660	AT2G36690	AT2G17710	AT2G31090	AT2G17380		AT1G58410
AT2G45200	AT2G17880	AT3G01490	AT2G17720	AT2G42670	AT2G18670	AT2G36770	AT2G17720	AT2G31200	AT2G17410		AT1G58420
AT2G45240	AT2G17975	AT3G01590	AT2G17730	AT2G42700	AT2G18690	AT2G36800	AT2G17740	AT2G31230	AT2G17420		AT1G58561
AT2G45500	AT2G17980	AT3G01650	AT2G17740	AT2G42790	AT2G18700	AT2G36810	AT2G17760	AT2G31350	AT2G17440		AT1G58590
AT2G45510	AT2G18000	AT3G01690	AT2G17760	AT2G42890	AT2G18730	AT2G36900	AT2G17790	AT2G31490	AT2G17500		AT1G58602
AT2G45600	AT2G18010	AT3G01720	AT2G17780	AT2G42950	AT2G18750	AT2G36960	AT2G17930	AT2G31510	AT2G17520		AT1G59520
AT2G45660	AT2G18170	AT3G01770	AT2G17790	AT2G42980	AT2G18770	AT2G36970	AT2G17975	AT2G31585	AT2G17530		AT1G59560
AT2G45790	AT2G18250	AT3G01790	AT2G17880	AT2G43000	AT2G18840	AT2G37035	AT2G17980	AT2G31740	AT2G17550		AT1G59580
AT2G45810	AT2G18280	AT3G01850	AT2G17920	AT2G43070	AT2G18876	AT2G37110	AT2G18000	AT2G31800	AT2G17560		AT1G59590
AT2G45980	AT2G18650	AT3G02070	AT2G17930	AT2G43080	AT2G18950	AT2G37120	AT2G18030	AT2G31810	AT2G17570		AT1G59600
AT2G46060	AT2G18660	AT3G02180	AT2G17975	AT2G43090	AT2G19110	AT2G37130	AT2G18170	AT2G31865	AT2G17580		AT1G59610
AT2G46140	AT2G18670	AT3G02340	AT2G17980	AT2G43130	AT2G19120	AT2G37150	AT2G18193	AT2G31870	AT2G17705		AT1G59620
AT2G46150	AT2G18690	AT3G02550	AT2G18000	AT2G43140	AT2G19130	AT2G37200	AT2G18250	AT2G31880	AT2G17710		AT1G59650
AT2G46170	AT2G18700	AT3G02680	AT2G18170	AT2G43150	AT2G19160	AT2G37430	AT2G18280	AT2G31955	AT2G17720		AT1G59700
AT2G46180	AT2G18730	AT3G02700	AT2G18250	AT2G43160	AT2G19190	AT2G37470	AT2G18330	AT2G31970	AT2G17730		AT1G59710
AT2G46220	AT2G18750	AT3G02740	AT2G18280	AT2G43210	AT2G19250	AT2G37520	AT2G18350	AT2G31990	AT2G17740		AT1G59820
AT2G46330	AT2G18770	AT3G02770	AT2G18290	AT2G43280	AT2G19260	AT2G37678	AT2G18390	AT2G32000	AT2G17760		AT1G59865
AT2G46400	AT2G18950	AT3G02800	AT2G18330	AT2G43320	AT2G19270	AT2G37710	AT2G18660	AT2G32030	AT2G17790		AT1G59870
AT2G46430	AT2G18960	AT3G02820	AT2G18660	AT2G43350	AT2G19390	AT2G37820	AT2G18670	AT2G32160	AT2G17920		AT1G59890
AT2G46440	AT2G19120	AT3G03000	AT2G18670	AT2G43400	AT2G19490	AT2G37840	AT2G18690	AT2G32190	AT2G17930		AT1G59900
AT2G46470	AT2G19130	AT3G03100	AT2G18690	AT2G43420	AT2G19520	AT2G37920	AT2G18730	AT2G32240	AT2G17975		AT1G59910
AT2G46490	AT2G19160	AT3G03150	AT2G18700	AT2G43460	AT2G19540	AT2G37940	AT2G18750	AT2G32380	AT2G17980		AT1G59950
AT2G46505	AT2G19190	AT3G03300	AT2G18730	AT2G43490	AT2G19570	AT2G37950	AT2G18770	AT2G32390	AT2G18000		AT1G59960
AT2G46540	AT2G19250	AT3G03330	AT2G18750	AT2G43510	AT2G19710	AT2G37975	AT2G18876	AT2G32487	AT2G18170		AT1G59990
AT2G46550	AT2G19270	AT3G03420	AT2G18770	AT2G43540	AT2G19790	AT2G37980	AT2G18950	AT2G32520	AT2G18280		AT1G60000
AT2G46600	AT2G19350	AT3G03560	AT2G18840	AT2G43570	AT2G19810	AT2G38000	AT2G19110	AT2G32680	AT2G18290		AT1G60070
AT2G46620	AT2G19390	AT3G03570	AT2G18876	AT2G43580	AT2G19830	AT2G38020	AT2G19120	AT2G32700	AT2G18330		AT1G60140
AT2G46650	AT2G19570	AT3G03590	AT2G18950	AT2G43590	AT2G19950	AT2G38130	AT2G19130	AT2G32730	AT2G18350		AT1G60170
AT2G47000	AT2G19710	AT3G03610	AT2G18960	AT2G43620	AT2G20010	AT2G38290	AT2G19160	AT2G32850	AT2G18660		AT1G60220
AT2G47130	AT2G19790	AT3G03640	AT2G19110	AT2G43640	AT2G20050	AT2G38310	AT2G19190	AT2G32870	AT2G18670		AT1G60420
AT2G47140	AT2G19810	AT3G03720	AT2G19120	AT2G43680	AT2G20060	AT2G38400	AT2G19240	AT2G32880	AT2G18690		AT1G60440
AT2G47170	AT2G19830	AT3G03830	AT2G19130	AT2G43790	AT2G20110	AT2G38410	AT2G19260	AT2G32885	AT2G18700		AT1G60490
AT2G47190	AT2G19950	AT3G03840	AT2G19160	AT2G43810	AT2G20140	AT2G38450	AT2G19270	AT2G32900	AT2G18730		AT1G60650
AT2G47210	AT2G20010	AT3G03850	AT2G19190	AT2G43820	AT2G20142	AT2G38460	AT2G19390	AT2G32920	AT2G18750		AT1G60730
AT2G47320	AT2G20110	AT3G03855	AT2G19390	AT2G43850	AT2G20150	AT2G38470	AT2G19490	AT2G33020	AT2G18770		AT1G60740
AT2G47380	AT2G20140	AT3G03860	AT2G19450	AT2G43940	AT2G20320	AT2G38500	AT2G19710	AT2G33040	AT2G18840		AT1G60780
AT2G47390	AT2G20142	AT3G03870	AT2G19520	AT2G43970	AT2G20360	AT2G38660	AT2G19740	AT2G33051	AT2G18876		AT1G60830
AT2G47470	AT2G20150	AT3G03990	AT2G19560	AT2G43980	AT2G20390	AT2G38670	AT2G19790	AT2G33080	AT2G18950		AT1G60840
AT2G47510	AT2G20180	AT3G04080	AT2G19570	AT2G44060	AT2G20420	AT2G38860	AT2G19810	AT2G33110	AT2G19080		AT1G60870
AT2G47600	AT2G20320	AT3G04181	AT2G19690	AT2G44080	AT2G20530	AT2G38870	AT2G19950	AT2G33120	AT2G19110		AT1G60890
AT2G47640	AT2G20330	AT3G04210	AT2G19710	AT2G44100	AT2G20580	AT2G38960	AT2G20010	AT2G33150	AT2G19130		AT1G60900
AT2G47650	AT2G20360	AT3G04220	AT2G19740	AT2G44140	AT2G20630	AT2G39000	AT2G20060	AT2G33170	AT2G19160		AT1G60910
AT2G47680	AT2G20370	AT3G04400	AT2G19760	AT2G44180	AT2G20650	AT2G39030	AT2G20140	AT2G33210	AT2G19190		AT1G60940
AT2G47690	AT2G20390	AT3G04480	AT2G19790	AT2G44280	AT2G20760	AT2G39050	AT2G20142	AT2G33220	AT2G19250		AT1G60960
AT2G47730	AT2G20420	AT3G04580	AT2G19810	AT2G44290	AT2G20770	AT2G39100	AT2G20150	AT2G33290	AT2G19260		AT1G60970
AT2G47760	AT2G20580	AT3G04670	AT2G19950	AT2G44350	AT2G20780	AT2G39200	AT2G20280	AT2G33470	AT2G19270		AT1G60989
AT2G47960	AT2G20630	AT3G04717	AT2G20010	AT2G44360	AT2G20790	AT2G39210	AT2G20320	AT2G33490	AT2G19350		AT1G60995
AT3G01080	AT2G20650	AT3G04720	AT2G20050	AT2G44370	AT2G20820	AT2G39260	AT2G20390	AT2G33580	AT2G19390		AT1G61000
AT3G01090	AT2G20760	AT3G04730	AT2G20140	AT2G44380	AT2G20850	AT2G39270	AT2G20420	AT2G33630	AT2G19470		AT1G61030
AT3G01120	AT2G20770	AT3G04880	AT2G20142	AT2G44410	AT2G20900	AT2G39350	AT2G20530	AT2G33730	AT2G19520		AT1G61040
AT3G01130	AT2G20780	AT3G04890	AT2G20320	AT2G44420	AT2G20930	AT2G39360	AT2G20580	AT2G33760	AT2G19540		AT1G61080
AT3G01170	AT2G20790	AT3G04910	AT2G20360	AT2G44480	AT2G20960	AT2G39380	AT2G20610	AT2G33830	AT2G19690		AT1G61100
AT3G01175	AT2G20820	AT3G04950	AT2G20390	AT2G44490	AT2G21120	AT2G39400	AT2G20630	AT2G33845	AT2G19710		AT1G61120
AT3G01280	AT2G20900	AT3G04970	AT2G20420	AT2G44500	AT2G21160	AT2G39480	AT2G20760	AT2G34040	AT2G19740		AT1G61140
AT3G01290	AT2G20930	AT3G05000	AT2G20530	AT2G44525	AT2G21188	AT2G39500	AT2G20770	AT2G34150	AT2G19790		AT1G61150
AT3G01310	AT2G20960	AT3G05010	AT2G20580	AT2G44530	AT2G21190	AT2G39518	AT2G20780	AT2G34250	AT2G19800		AT1G61160
AT3G01360	AT2G21130	AT3G05090	AT2G20610	AT2G44610	AT2G21230	AT2G39530	AT2G20790	AT2G34470	AT2G19810		AT1G61170
AT3G01390	AT2G21188	AT3G05120	AT2G20630	AT2G44620	AT2G21240	AT2G39550	AT2G20820	AT2G34585	AT2G19830		AT1G61180
AT3G01690	AT2G21190	AT3G05160	AT2G20650	AT2G44660	AT2G21270	AT2G39630	AT2G20850	AT2G34650	AT2G19950		AT1G61240
AT3G01720	AT2G21230	AT3G05200	AT2G20760	AT2G44850	AT2G21350	AT2G39660	AT2G20900	AT2G34690	AT2G20010		AT1G61250
AT3G01830	AT2G21240	AT3G05230	AT2G20770	AT2G44980	AT2G21390	AT2G39710	AT2G20930	AT2G34840	AT2G20050		AT1G61255
AT3G01850	AT2G21270	AT3G05280	AT2G20780	AT2G45010	AT2G21410	AT2G39740	AT2G20960	AT2G34940	AT2G20110		AT1G61260
AT3G01930	AT2G21350	AT3G05500	AT2G20790	AT2G45070	AT2G21470	AT2G39780	AT2G21120	AT2G35050	AT2G20140		AT1G61275
AT3G02080	AT2G21390	AT3G05660	AT2G20820	AT2G45140	AT2G21500	AT2G39930	AT2G21160	AT2G35060	AT2G20142		AT1G61310
AT3G02090	AT2G21470	AT3G05970	AT2G20850	AT2G45170	AT2G21520	AT2G39960	AT2G21188	AT2G35070	AT2G20150		AT1G61340
AT3G02150	AT2G21500	AT3G06050	AT2G20900	AT2G45200	AT2G21550	AT2G39970	AT2G21230	AT2G35110	AT2G20280		AT1G61350
AT3G02180	AT2G21520	AT3G06070	AT2G20930	AT2G45210	AT2G21620	AT2G40095	AT2G21240	AT2G35240	AT2G20320		AT1G61360
AT3G02190	AT2G21550	AT3G06110	AT2G20960	AT2G45220	AT2G21850	AT2G40110	AT2G21250	AT2G35520	AT2G20330		AT1G61370
AT3G02340	AT2G21620	AT3G06170	AT2G21160	AT2G45240	AT2G21870	AT2G40113	AT2G21270	AT2G35610	AT2G20370		AT1G61380
AT3G02360	AT2G21850	AT3G06300	AT2G21188	AT2G45500	AT2G21900	AT2G40140	AT2G21350	AT2G35650	AT2G20390		AT1G61390
AT3G02460	AT2G21870	AT3G06320	AT2G21230	AT2G45510	AT2G21910	AT2G40180	AT2G21390	AT2G35680	AT2G20420		AT1G61420
AT3G02550	AT2G21900	AT3G06380	AT2G21240	AT2G45540	AT2G21950	AT2G40270	AT2G21410	AT2G35736	AT2G20530		AT1G61430
AT3G02630	AT2G22010	AT3G06430	AT2G21270	AT2G45660	AT2G22010	AT2G40330	AT2G21430	AT2G35744	AT2G20560		AT1G61440
AT3G02650	AT2G22120	AT3G06450	AT2G21350	AT2G45760	AT2G22120	AT2G40410	AT2G21470	AT2G35790	AT2G20580		AT1G61460
AT3G02710	AT2G22300	AT3G06470	AT2G21390	AT2G45790	AT2G22300	AT2G40420	AT2G21500	AT2G35810	AT2G20610		AT1G61480
AT3G02730	AT2G22310	AT3G06483	AT2G21410	AT2G45910	AT2G22310	AT2G40600	AT2G21520	AT2G35930	AT2G20630		AT1G61490
AT3G02740	AT2G22425	AT3G06580	AT2G21470	AT2G45980	AT2G22330	AT2G40620	AT2G21550	AT2G35980	AT2G20650		AT1G61510
AT3G02770	AT2G22470	AT3G06790	AT2G21520	AT2G46000	AT2G22425	AT2G40640	AT2G21620	AT2G36060	AT2G20670		AT1G61520
AT3G02800	AT2G22475	AT3G06850	AT2G21550	AT2G46060	AT2G22430	AT2G40740	AT2G21840	AT2G36220	AT2G20760		AT1G61550
AT3G02820	AT2G22480	AT3G06950	AT2G21620	AT2G46140	AT2G22470	AT2G40750	AT2G21850	AT2G36320	AT2G20770		AT1G61560
AT3G02840	AT2G22570	AT3G06960	AT2G21840	AT2G46150	AT2G22475	AT2G40765	AT2G21870	AT2G36330	AT2G20780		AT1G61570
AT3G02870	AT2G22660	AT3G07010	AT2G21850	AT2G46170	AT2G22480	AT2G40840	AT2G21900	AT2G36360	AT2G20790		AT1G61580
AT3G03020	AT2G22690	AT3G07040	AT2G21870	AT2G46180	AT2G22500	AT2G40860	AT2G21950	AT2G36400	AT2G20820		AT1G61610
AT3G03100	AT2G22780	AT3G07060	AT2G21900	AT2G46220	AT2G22530	AT2G40880	AT2G22120	AT2G36420	AT2G20900		AT1G61620
AT3G03180	AT2G22830	AT3G07080	AT2G22010	AT2G46260	AT2G22560	AT2G40935	AT2G22300	AT2G36430	AT2G20930		AT1G61640
AT3G03305	AT2G22880	AT3G07140	AT2G22120	AT2G46270	AT2G22570	AT2G40940	AT2G22310	AT2G36460	AT2G20960		AT1G61667
AT3G03310	AT2G22910	AT3G07180	AT2G22300	AT2G46330	AT2G22660	AT2G41090	AT2G22330	AT2G36470	AT2G21160		AT1G61670
AT3G03560	AT2G23080	AT3G07195	AT2G22310	AT2G46390	AT2G22740	AT2G41100	AT2G22425	AT2G36580	AT2G21190		AT1G61690
AT3G03570	AT2G23140	AT3G07280	AT2G22330	AT2G46400	AT2G22780	AT2G41180	AT2G22430	AT2G36670	AT2G21230		AT1G61730
AT3G03590	AT2G23170	AT3G07350	AT2G22425	AT2G46430	AT2G22880	AT2G41220	AT2G22480	AT2G36680	AT2G21240		AT1G61770
AT3G03640	AT2G23200	AT3G07480	AT2G22470	AT2G46440	AT2G22910	AT2G41380	AT2G22500	AT2G36690	AT2G21270		AT1G61780
AT3G03720	AT2G23270	AT3G07525	AT2G22475	AT2G46470	AT2G22970	AT2G41410	AT2G22570	AT2G36730	AT2G21350		AT1G61790
AT3G03820	AT2G23320	AT3G07570	AT2G22480	AT2G46490	AT2G23110	AT2G41420	AT2G22630	AT2G36810	AT2G21390		AT1G61795
AT3G03830	AT2G23370	AT3G07580	AT2G22560	AT2G46500	AT2G23140	AT2G41430	AT2G22660	AT2G36900	AT2G21470		AT1G61800
AT3G03850	AT2G23450	AT3G07680	AT2G22570	AT2G46505	AT2G23170	AT2G41440	AT2G22780	AT2G36960	AT2G21500		AT1G61810
AT3G03855	AT2G23680	AT3G07690	AT2G22660	AT2G46540	AT2G23200	AT2G41470	AT2G22880	AT2G36970	AT2G21520		AT1G61820
AT3G03860	AT2G23770	AT3G07800	AT2G22680	AT2G46550	AT2G23270	AT2G41490	AT2G22910	AT2G37110	AT2G21550		AT1G61850
AT3G03870	AT2G23780	AT3G07950	AT2G22690	AT2G46560	AT2G23310	AT2G41530	AT2G22970	AT2G37120	AT2G21620		AT1G62020
AT3G03990	AT2G23810	AT3G08550	AT2G22740	AT2G46600	AT2G23320	AT2G41640	AT2G23080	AT2G37130	AT2G21850		AT1G62040
AT3G04060	AT2G23830	AT3G08610	AT2G22780	AT2G46620	AT2G23370	AT2G41700	AT2G23110	AT2G37150	AT2G21870		AT1G62130
AT3G04070	AT2G23840	AT3G08650	AT2G22830	AT2G46900	AT2G23450	AT2G41705	AT2G23170	AT2G37160	AT2G21900		AT1G62200
AT3G04090	AT2G23890	AT3G08710	AT2G22880	AT2G46940	AT2G23490	AT2G41710	AT2G23200	AT2G37250	AT2G21910		AT1G62260
AT3G04120	AT2G23940	AT3G08760	AT2G22910	AT2G47000	AT2G23680	AT2G41730	AT2G23270	AT2G37310	AT2G22010		AT1G62300
AT3G04210	AT2G23980	AT3G08780	AT2G22970	AT2G47130	AT2G23770	AT2G41835	AT2G23320	AT2G37430	AT2G22120		AT1G62305
AT3G04220	AT2G24100	AT3G08870	AT2G23110	AT2G47140	AT2G23810	AT2G41880	AT2G23370	AT2G37520	AT2G22300		AT1G62310
AT3G04400	AT2G24160	AT3G08890	AT2G23140	AT2G47170	AT2G23830	AT2G42010	AT2G23450	AT2G37678	AT2G22310		AT1G62330
AT3G04480	AT2G24165	AT3G08920	AT2G23170	AT2G47190	AT2G23890	AT2G42160	AT2G23680	AT2G37680	AT2G22425		AT1G62370
AT3G04670	AT2G24180	AT3G08940	AT2G23200	AT2G47210	AT2G23940	AT2G42280	AT2G23770	AT2G37690	AT2G22430		AT1G62380
AT3G04717	AT2G24200	AT3G09000	AT2G23270	AT2G47320	AT2G24100	AT2G42350	AT2G23810	AT2G37710	AT2G22470		AT1G62420
AT3G04720	AT2G24240	AT3G09010	AT2G23290	AT2G47380	AT2G24180	AT2G42360	AT2G23830	AT2G37820	AT2G22475		AT1G62422
AT3G04880	AT2G24285	AT3G09020	AT2G23310	AT2G47390	AT2G24200	AT2G42390	AT2G23890	AT2G37840	AT2G22480		AT1G62430
AT3G04890	AT2G24360	AT3G09030	AT2G23320	AT2G47470	AT2G24240	AT2G42400	AT2G23940	AT2G37920	AT2G22490		AT1G62570
AT3G04910	AT2G24390	AT3G09040	AT2G23370	AT2G47510	AT2G24285	AT2G42520	AT2G24160	AT2G37940	AT2G22500		AT1G62580
AT3G05040	AT2G24550	AT3G09085	AT2G23450	AT2G47640	AT2G24360	AT2G42670	AT2G24165	AT2G37950	AT2G22560		AT1G62600
AT3G05090	AT2G24600	AT3G09090	AT2G23680	AT2G47650	AT2G24390	AT2G42700	AT2G24180	AT2G37960	AT2G22570		AT1G62660
AT3G05100	AT2G24650	AT3G09300	AT2G23770	AT2G47680	AT2G24550	AT2G42790	AT2G24200	AT2G37975	AT2G22630		AT1G62730
AT3G05200	AT2G24830	AT3G09405	AT2G23810	AT2G47690	AT2G24600	AT2G42890	AT2G24240	AT2G37980	AT2G22660		AT1G62740
AT3G05230	AT2G24850	AT3G09410	AT2G23830	AT2G47730	AT2G24645	AT2G42950	AT2G24285	AT2G38000	AT2G22780		AT1G62790
AT3G05280	AT2G24860	AT3G09470	AT2G23890	AT2G47760	AT2G24765	AT2G43000	AT2G24360	AT2G38020	AT2G22860		AT1G62810
AT3G05420	AT2G25000	AT3G09490	AT2G23940	AT2G47960	AT2G24830	AT2G43060	AT2G24390	AT2G38130	AT2G22880		AT1G62820
AT3G05500	AT2G25070	AT3G09570	AT2G24160	AT2G48000	AT2G24850	AT2G43070	AT2G24550	AT2G38290	AT2G22970		AT1G62840
AT3G05710	AT2G25090	AT3G09580	AT2G24165	AT2G48030	AT2G24860	AT2G43080	AT2G24600	AT2G38310	AT2G23080		AT1G62880
AT3G05910	AT2G25110	AT3G09735	AT2G24180	AT3G01050	AT2G24960	AT2G43090	AT2G24645	AT2G38410	AT2G23110		AT1G63000
AT3G05970	AT2G25190	AT3G09740	AT2G24200	AT3G01080	AT2G25000	AT2G43140	AT2G24765	AT2G38470	AT2G23140		AT1G63010
AT3G06050	AT2G25200	AT3G09810	AT2G24240	AT3G01090	AT2G25010	AT2G43150	AT2G24850	AT2G38670	AT2G23170		AT1G63020
AT3G06070	AT2G25260	AT3G09830	AT2G24285	AT3G01130	AT2G25070	AT2G43160	AT2G24860	AT2G38790	AT2G23200		AT1G63090
AT3G06170	AT2G25280	AT3G09840	AT2G24360	AT3G01170	AT2G25090	AT2G43210	AT2G25000	AT2G38860	AT2G23270		AT1G63110
AT3G06300	AT2G25300	AT3G09860	AT2G24390	AT3G01280	AT2G25100	AT2G43350	AT2G25070	AT2G38960	AT2G23310		AT1G63180
AT3G06320	AT2G25350	AT3G09940	AT2G24550	AT3G01290	AT2G25110	AT2G43400	AT2G25090	AT2G38970	AT2G23320		AT1G63220
AT3G06370	AT2G25440	AT3G10010	AT2G24600	AT3G01310	AT2G25170	AT2G43490	AT2G25100	AT2G39050	AT2G23321		AT1G63245
AT3G06450	AT2G25450	AT3G10120	AT2G24645	AT3G01360	AT2G25190	AT2G43510	AT2G25110	AT2G39090	AT2G23330		AT1G63270
AT3G06470	AT2G25470	AT3G10250	AT2G24765	AT3G01380	AT2G25260	AT2G43540	AT2G25170	AT2G39100	AT2G23450		AT1G63295
AT3G06483	AT2G25510	AT3G10260	AT2G24830	AT3G01720	AT2G25280	AT2G43590	AT2G25190	AT2G39110	AT2G23680		AT1G63350
AT3G06500	AT2G25520	AT3G10500	AT2G24850	AT3G01770	AT2G25310	AT2G43620	AT2G25260	AT2G39200	AT2G23770		AT1G63370
AT3G06540	AT2G25625	AT3G10640	AT2G24860	AT3G01830	AT2G25320	AT2G43680	AT2G25280	AT2G39210	AT2G23810		AT1G63380
AT3G06580	AT2G25730	AT3G10740	AT2G25000	AT3G01850	AT2G25350	AT2G43790	AT2G25300	AT2G39230	AT2G23830		AT1G63440
AT3G06590	AT2G25735	AT3G10770	AT2G25070	AT3G01910	AT2G25440	AT2G43850	AT2G25310	AT2G39260	AT2G23890		AT1G63460
AT3G06790	AT2G25737	AT3G10860	AT2G25090	AT3G01970	AT2G25460	AT2G43940	AT2G25320	AT2G39270	AT2G23940		AT1G63490
AT3G06850	AT2G25760	AT3G10915	AT2G25110	AT3G02070	AT2G25510	AT2G43970	AT2G25350	AT2G39310	AT2G24100		AT1G63500
AT3G06860	AT2G25850	AT3G10920	AT2G25170	AT3G02090	AT2G25520	AT2G43980	AT2G25355	AT2G39340	AT2G24160		AT1G63610
AT3G06900	AT2G25900	AT3G10985	AT2G25190	AT3G02340	AT2G25610	AT2G44065	AT2G25440	AT2G39350	AT2G24165		AT1G63670
AT3G06960	AT2G25910	AT3G11010	AT2G25200	AT3G02360	AT2G25625	AT2G44080	AT2G25450	AT2G39400	AT2G24170		AT1G63690
AT3G07010	AT2G26010	AT3G11030	AT2G25260	AT3G02460	AT2G25730	AT2G44100	AT2G25460	AT2G39480	AT2G24180		AT1G63720
AT3G07040	AT2G26020	AT3G11040	AT2G25280	AT3G02550	AT2G25735	AT2G44140	AT2G25470	AT2G39530	AT2G24200		AT1G63730
AT3G07060	AT2G26030	AT3G11080	AT2G25300	AT3G02630	AT2G25737	AT2G44180	AT2G25510	AT2G39550	AT2G24240		AT1G63740
AT3G07080	AT2G26190	AT3G11230	AT2G25320	AT3G02700	AT2G25740	AT2G44280	AT2G25520	AT2G39660	AT2G24285		AT1G63750
AT3G07110	AT2G26230	AT3G11240	AT2G25350	AT3G02740	AT2G25760	AT2G44360	AT2G25590	AT2G39675	AT2G24360		AT1G63770
AT3G07140	AT2G26240	AT3G11270	AT2G25420	AT3G02770	AT2G25850	AT2G44370	AT2G25625	AT2G39710	AT2G24390		AT1G63800
AT3G07195	AT2G26260	AT3G11320	AT2G25440	AT3G02800	AT2G25910	AT2G44420	AT2G25650	AT2G39740	AT2G24550		AT1G63830
AT3G07350	AT2G26290	AT3G11340	AT2G25450	AT3G02820	AT2G25930	AT2G44480	AT2G25730	AT2G39780	AT2G24600		AT1G63840
AT3G07480	AT2G26300	AT3G11402	AT2G25460	AT3G02840	AT2G25970	AT2G44490	AT2G25735	AT2G39920	AT2G24765		AT1G63860
AT3G07525	AT2G26310	AT3G11500	AT2G25470	AT3G03000	AT2G26010	AT2G44500	AT2G25760	AT2G39960	AT2G24830		AT1G63880
AT3G07580	AT2G26390	AT3G11770	AT2G25490	AT3G03020	AT2G26020	AT2G44530	AT2G25850	AT2G40000	AT2G24850		AT1G63900
AT3G07600	AT2G26400	AT3G11780	AT2G25510	AT3G03160	AT2G26030	AT2G44660	AT2G25910	AT2G40095	AT2G24860		AT1G63970
AT3G07640	AT2G26440	AT3G11810	AT2G25520	AT3G03180	AT2G26140	AT2G44730	AT2G25930	AT2G40110	AT2G24990		AT1G64065
AT3G07680	AT2G26480	AT3G11820	AT2G25625	AT3G03305	AT2G26190	AT2G44760	AT2G26010	AT2G40140	AT2G25000		AT1G64090
AT3G07690	AT2G26510	AT3G11840	AT2G25730	AT3G03310	AT2G26230	AT2G44790	AT2G26020	AT2G40180	AT2G25070		AT1G64170
AT3G07790	AT2G26530	AT3G11850	AT2G25735	AT3G03330	AT2G26240	AT2G44850	AT2G26190	AT2G40270	AT2G25090		AT1G64190
AT3G07800	AT2G26560	AT3G11910	AT2G25737	AT3G03420	AT2G26290	AT2G44890	AT2G26200	AT2G40330	AT2G25110		AT1G64200
AT3G07940	AT2G26570	AT3G11930	AT2G25760	AT3G03490	AT2G26300	AT2G44980	AT2G26230	AT2G40340	AT2G25170		AT1G64280
AT3G07950	AT2G26600	AT3G11945	AT2G25850	AT3G03560	AT2G26310	AT2G44995	AT2G26240	AT2G40410	AT2G25190		AT1G64300
AT3G08510	AT2G26650	AT3G12030	AT2G25910	AT3G03570	AT2G26390	AT2G45010	AT2G26290	AT2G40420	AT2G25280		AT1G64350
AT3G08550	AT2G26670	AT3G12040	AT2G26010	AT3G03610	AT2G26400	AT2G45070	AT2G26300	AT2G40510	AT2G25300		AT1G64360
AT3G08580	AT2G26710	AT3G12100	AT2G26020	AT3G03720	AT2G26440	AT2G45140	AT2G26360	AT2G40600	AT2G25310		AT1G64370
AT3G08610	AT2G26780	AT3G12220	AT2G26030	AT3G03855	AT2G26460	AT2G45170	AT2G26390	AT2G40610	AT2G25320		AT1G64385
AT3G08640	AT2G26890	AT3G12260	AT2G26140	AT3G03870	AT2G26480	AT2G45200	AT2G26400	AT2G40620	AT2G25350		AT1G64400
AT3G08650	AT2G26920	AT3G12290	AT2G26190	AT3G04080	AT2G26510	AT2G45210	AT2G26440	AT2G40650	AT2G25355		AT1G64405
AT3G08760	AT2G26990	AT3G12360	AT2G26230	AT3G04120	AT2G26530	AT2G45220	AT2G26460	AT2G40740	AT2G25420		AT1G64460
AT3G08870	AT2G27020	AT3G12490	AT2G26240	AT3G04181	AT2G26560	AT2G45330	AT2G26480	AT2G40750	AT2G25440		AT1G64470
AT3G08885	AT2G27030	AT3G12520	AT2G26260	AT3G04210	AT2G26570	AT2G45350	AT2G26510	AT2G40765	AT2G25450		AT1G64520
AT3G08890	AT2G27050	AT3G12570	AT2G26290	AT3G04220	AT2G26590	AT2G45360	AT2G26530	AT2G40810	AT2G25470		AT1G64563
AT3G08920	AT2G27150	AT3G12650	AT2G26300	AT3G04400	AT2G26600	AT2G45500	AT2G26560	AT2G40880	AT2G25510		AT1G64570
AT3G08940	AT2G27170	AT3G12710	AT2G26390	AT3G04480	AT2G26650	AT2G45510	AT2G26570	AT2G40940	AT2G25520		AT1G64572
AT3G09000	AT2G27200	AT3G12740	AT2G26400	AT3G04580	AT2G26670	AT2G45540	AT2G26600	AT2G40950	AT2G25580		AT1G64610
AT3G09010	AT2G27210	AT3G12830	AT2G26440	AT3G04670	AT2G26780	AT2G45620	AT2G26650	AT2G41090	AT2G25590		AT1G64650
AT3G09020	AT2G27285	AT3G12910	AT2G26480	AT3G04717	AT2G26890	AT2G45660	AT2G26670	AT2G41100	AT2G25625		AT1G64660
AT3G09030	AT2G27310	AT3G12950	AT2G26510	AT3G04720	AT2G26920	AT2G45680	AT2G26780	AT2G41110	AT2G25670		AT1G64710
AT3G09200	AT2G27350	AT3G13030	AT2G26530	AT3G04740	AT2G26990	AT2G45760	AT2G26890	AT2G41180	AT2G25690		AT1G64750
AT3G09300	AT2G27460	AT3G13050	AT2G26560	AT3G04880	AT2G27020	AT2G45790	AT2G26920	AT2G41220	AT2G25730		AT1G64810
AT3G09405	AT2G27510	AT3G13060	AT2G26570	AT3G04890	AT2G27050	AT2G45910	AT2G26975	AT2G41410	AT2G25735		AT1G64850
AT3G09410	AT2G27600	AT3G13062	AT2G26590	AT3G04910	AT2G27150	AT2G45980	AT2G27020	AT2G41420	AT2G25737		AT1G64880
AT3G09470	AT2G27660	AT3G13235	AT2G26600	AT3G04970	AT2G27170	AT2G46020	AT2G27030	AT2G41430	AT2G25740		AT1G64890
AT3G09490	AT2G27690	AT3G13330	AT2G26650	AT3G05000	AT2G27190	AT2G46060	AT2G27150	AT2G41490	AT2G25760		AT1G64950
AT3G09570	AT2G27730	AT3G13380	AT2G26670	AT3G05010	AT2G27200	AT2G46140	AT2G27170	AT2G41510	AT2G25850		AT1G64990
AT3G09580	AT2G27830	AT3G13410	AT2G26780	AT3G05090	AT2G27210	AT2G46150	AT2G27200	AT2G41530	AT2G25910		AT1G65000
AT3G09690	AT2G27900	AT3G13430	AT2G26890	AT3G05120	AT2G27285	AT2G46192	AT2G27210	AT2G41700	AT2G25930		AT1G65020
AT3G09735	AT2G27920	AT3G13450	AT2G26920	AT3G05200	AT2G27310	AT2G46220	AT2G27285	AT2G41705	AT2G26010		AT1G65040
AT3G09810	AT2G28110	AT3G13550	AT2G27020	AT3G05230	AT2G27350	AT2G46240	AT2G27310	AT2G41710	AT2G26020		AT1G65120
AT3G09830	AT2G28120	AT3G13560	AT2G27050	AT3G05250	AT2G27460	AT2G46260	AT2G27350	AT2G41730	AT2G26190		AT1G65240
AT3G09840	AT2G28160	AT3G13610	AT2G27150	AT3G05280	AT2G27600	AT2G46330	AT2G27600	AT2G41740	AT2G26200		AT1G65250
AT3G09860	AT2G28210	AT3G13720	AT2G27170	AT3G05500	AT2G27660	AT2G46390	AT2G27660	AT2G41780	AT2G26210		AT1G65270
AT3G09900	AT2G28350	AT3G13750	AT2G27200	AT3G05580	AT2G27690	AT2G46400	AT2G27690	AT2G41790	AT2G26230		AT1G65290
AT3G09940	AT2G28360	AT3G13910	AT2G27210	AT3G05650	AT2G27730	AT2G46430	AT2G27730	AT2G41835	AT2G26240		AT1G65360
AT3G10010	AT2G28400	AT3G13950	AT2G27310	AT3G05660	AT2G27900	AT2G46440	AT2G27900	AT2G41880	AT2G26260		AT1G65370
AT3G10120	AT2G28500	AT3G14050	AT2G27350	AT3G05680	AT2G27920	AT2G46450	AT2G27920	AT2G42010	AT2G26290		AT1G65390
AT3G10250	AT2G28520	AT3G14090	AT2G27460	AT3G05710	AT2G28110	AT2G46470	AT2G28110	AT2G42160	AT2G26300		AT1G65410
AT3G10260	AT2G28570	AT3G14120	AT2G27500	AT3G05760	AT2G28120	AT2G46490	AT2G28120	AT2G42330	AT2G26310		AT1G65440
AT3G10320	AT2G28710	AT3G14130	AT2G27600	AT3G05830	AT2G28160	AT2G46505	AT2G28130	AT2G42350	AT2G26360		AT1G65481
AT3G10370	AT2G28755	AT3G14150	AT2G27660	AT3G05970	AT2G28210	AT2G46560	AT2G28160	AT2G42360	AT2G26390		AT1G65483
AT3G10640	AT2G28760	AT3G14225	AT2G27690	AT3G06050	AT2G28290	AT2G46600	AT2G28210	AT2G42390	AT2G26400		AT1G65484
AT3G10740	AT2G28830	AT3G14290	AT2G27730	AT3G06170	AT2G28360	AT2G46610	AT2G28290	AT2G42400	AT2G26440		AT1G65486
AT3G10815	AT2G28840	AT3G14310	AT2G27830	AT3G06210	AT2G28400	AT2G46620	AT2G28360	AT2G42480	AT2G26460		AT1G65500
AT3G10860	AT2G28890	AT3G14410	AT2G27900	AT3G06300	AT2G28500	AT2G46900	AT2G28400	AT2G42520	AT2G26510		AT1G65510
AT3G10915	AT2G28940	AT3G14430	AT2G27920	AT3G06310	AT2G28570	AT2G46940	AT2G28500	AT2G42680	AT2G26530		AT1G65520
AT3G10920	AT2G28960	AT3G14460	AT2G28110	AT3G06320	AT2G28630	AT2G47000	AT2G28570	AT2G42790	AT2G26560		AT1G65540
AT3G10930	AT2G29020	AT3G14470	AT2G28120	AT3G06380	AT2G28710	AT2G47130	AT2G28630	AT2G42870	AT2G26570		AT1G65580
AT3G10985	AT2G29065	AT3G14610	AT2G28130	AT3G06440	AT2G28755	AT2G47140	AT2G28710	AT2G42890	AT2G26590		AT1G65590
AT3G11010	AT2G29070	AT3G14620	AT2G28160	AT3G06450	AT2G28830	AT2G47190	AT2G28720	AT2G42950	AT2G26600		AT1G65610
AT3G11030	AT2G29080	AT3G14840	AT2G28210	AT3G06470	AT2G28840	AT2G47240	AT2G28755	AT2G43000	AT2G26650		AT1G65690
AT3G11090	AT2G29100	AT3G14910	AT2G28290	AT3G06483	AT2G28890	AT2G47320	AT2G28760	AT2G43050	AT2G26670		AT1G65720
AT3G11240	AT2G29110	AT3G14930	AT2G28360	AT3G06500	AT2G28940	AT2G47380	AT2G28830	AT2G43060	AT2G26780		AT1G65730
AT3G11270	AT2G29120	AT3G15000	AT2G28400	AT3G06540	AT2G29020	AT2G47390	AT2G28840	AT2G43070	AT2G26890		AT1G65790
AT3G11280	AT2G29140	AT3G15040	AT2G28500	AT3G06580	AT2G29065	AT2G47470	AT2G28890	AT2G43080	AT2G26920		AT1G65800
AT3G11320	AT2G29350	AT3G15070	AT2G28520	AT3G06790	AT2G29070	AT2G47510	AT2G28940	AT2G43090	AT2G26970		AT1G65820
AT3G11340	AT2G29400	AT3G15355	AT2G28570	AT3G06850	AT2G29080	AT2G47640	AT2G29020	AT2G43140	AT2G26975		AT1G65845
AT3G11402	AT2G29410	AT3G15356	AT2G28630	AT3G06860	AT2G29100	AT2G47650	AT2G29065	AT2G43150	AT2G27020		AT1G65850
AT3G11510	AT2G29420	AT3G15358	AT2G28660	AT3G06940	AT2G29110	AT2G47680	AT2G29070	AT2G43160	AT2G27090		AT1G65960
AT3G11570	AT2G29460	AT3G15390	AT2G28710	AT3G06960	AT2G29120	AT2G47690	AT2G29080	AT2G43210	AT2G27150		AT1G65970
AT3G11580	AT2G29470	AT3G15410	AT2G28755	AT3G07010	AT2G29140	AT2G47760	AT2G29100	AT2G43350	AT2G27170		AT1G65980
AT3G11590	AT2G29490	AT3G15430	AT2G28830	AT3G07040	AT2G29350	AT2G47960	AT2G29110	AT2G43490	AT2G27200		AT1G66040
AT3G11780	AT2G29500	AT3G15450	AT2G28840	AT3G07060	AT2G29400	AT2G48000	AT2G29120	AT2G43540	AT2G27210		AT1G66060
AT3G11800	AT2G29560	AT3G15500	AT2G28890	AT3G07080	AT2G29410	AT2G48060	AT2G29140	AT2G43570	AT2G27285		AT1G66070
AT3G11820	AT2G29640	AT3G15510	AT2G28940	AT3G07140	AT2G29460	AT2G48110	AT2G29340	AT2G43590	AT2G27310		AT1G66090
AT3G11840	AT2G29670	AT3G15518	AT2G29020	AT3G07180	AT2G29470	AT3G01050	AT2G29350	AT2G43620	AT2G27350		AT1G66150
AT3G11850	AT2G29720	AT3G15580	AT2G29065	AT3G07195	AT2G29500	AT3G01080	AT2G29400	AT2G43640	AT2G27480		AT1G66160
AT3G12030	AT2G29740	AT3G15630	AT2G29070	AT3G07220	AT2G29560	AT3G01130	AT2G29420	AT2G43680	AT2G27590		AT1G66170
AT3G12040	AT2G29960	AT3G15640	AT2G29080	AT3G07440	AT2G29640	AT3G01150	AT2G29460	AT2G43780	AT2G27600		AT1G66173
AT3G12100	AT2G29990	AT3G15660	AT2G29100	AT3G07480	AT2G29670	AT3G01175	AT2G29470	AT2G43790	AT2G27660		AT1G66200
AT3G12145	AT2G30050	AT3G15760	AT2G29110	AT3G07568	AT2G29720	AT3G01290	AT2G29500	AT2G43820	AT2G27730		AT1G66230
AT3G12220	AT2G30060	AT3G15770	AT2G29120	AT3G07580	AT2G29740	AT3G01300	AT2G29560	AT2G43850	AT2G27900		AT1G66240
AT3G12260	AT2G30105	AT3G15840	AT2G29140	AT3G07600	AT2G29750	AT3G01310	AT2G29640	AT2G43940	AT2G27920		AT1G66340
AT3G12290	AT2G30110	AT3G15920	AT2G29340	AT3G07680	AT2G29940	AT3G01360	AT2G29720	AT2G43970	AT2G28110		AT1G66390
AT3G12490	AT2G30140	AT3G15930	AT2G29350	AT3G07690	AT2G29960	AT3G01513	AT2G29740	AT2G43980	AT2G28120		AT1G66410
AT3G12570	AT2G30230	AT3G15980	AT2G29400	AT3G07780	AT2G29990	AT3G01600	AT2G29960	AT2G44060	AT2G28160		AT1G66480
AT3G12680	AT2G30250	AT3G16030	AT2G29410	AT3G07790	AT2G30050	AT3G01720	AT2G29990	AT2G44065	AT2G28210		AT1G66550
AT3G12740	AT2G30440	AT3G16530	AT2G29420	AT3G07800	AT2G30110	AT3G01750	AT2G30140	AT2G44080	AT2G28290		AT1G66570
AT3G12830	AT2G30520	AT3G16565	AT2G29460	AT3G07950	AT2G30140	AT3G01760	AT2G30250	AT2G44100	AT2G28360		AT1G66580
AT3G13050	AT2G30530	AT3G16700	AT2G29470	AT3G07980	AT2G30250	AT3G01830	AT2G30440	AT2G44140	AT2G28400		AT1G66590
AT3G13060	AT2G30550	AT3G16720	AT2G29490	AT3G08530	AT2G30400	AT3G01850	AT2G30530	AT2G44180	AT2G28500		AT1G66600
AT3G13062	AT2G30580	AT3G16740	AT2G29500	AT3G08550	AT2G30440	AT3G01910	AT2G30550	AT2G44280	AT2G28570		AT1G66620
AT3G13080	AT2G30710	AT3G16770	AT2G29560	AT3G08580	AT2G30530	AT3G01970	AT2G30620	AT2G44290	AT2G28630		AT1G66670
AT3G13200	AT2G30720	AT3G16785	AT2G29640	AT3G08610	AT2G30550	AT3G02040	AT2G30720	AT2G44360	AT2G28720		AT1G66680
AT3G13235	AT2G30740	AT3G16800	AT2G29670	AT3G08650	AT2G30710	AT3G02065	AT2G30770	AT2G44370	AT2G28755		AT1G66700
AT3G13330	AT2G30770	AT3G16990	AT2G29720	AT3G08710	AT2G30720	AT3G02070	AT2G30840	AT2G44380	AT2G28830		AT1G66725
AT3G13410	AT2G30860	AT3G17000	AT2G29740	AT3G08720	AT2G30770	AT3G02190	AT2G30860	AT2G44383	AT2G28840		AT1G66780
AT3G13430	AT2G30870	AT3G17020	AT2G29750	AT3G08760	AT2G30860	AT3G02340	AT2G30870	AT2G44400	AT2G28890		AT1G66830
AT3G13437	AT2G30880	AT3G17100	AT2G29940	AT3G08780	AT2G30870	AT3G02360	AT2G30880	AT2G44410	AT2G28940		AT1G66880
AT3G13550	AT2G30920	AT3G17205	AT2G29960	AT3G08870	AT2G30880	AT3G02460	AT2G31020	AT2G44420	AT2G28960		AT1G66890
AT3G13560	AT2G30990	AT3G17240	AT2G29990	AT3G08885	AT2G30970	AT3G02520	AT2G31060	AT2G44480	AT2G29020		AT1G66900
AT3G13610	AT2G31020	AT3G17340	AT2G30050	AT3G08890	AT2G31020	AT3G02550	AT2G31200	AT2G44490	AT2G29065		AT1G66910
AT3G13672	AT2G31060	AT3G17410	AT2G30110	AT3G08940	AT2G31060	AT3G02630	AT2G31230	AT2G44530	AT2G29070		AT1G66920
AT3G13677	AT2G31090	AT3G17420	AT2G30140	AT3G08950	AT2G31090	AT3G02740	AT2G31350	AT2G44610	AT2G29080		AT1G66940
AT3G13720	AT2G31130	AT3G17700	AT2G30250	AT3G08960	AT2G31200	AT3G02770	AT2G31585	AT2G44660	AT2G29100		AT1G66960
AT3G13772	AT2G31200	AT3G17780	AT2G30395	AT3G09000	AT2G31230	AT3G02840	AT2G31740	AT2G44760	AT2G29110		AT1G66970
AT3G13790	AT2G31230	AT3G17850	AT2G30440	AT3G09010	AT2G31260	AT3G02875	AT2G31800	AT2G44850	AT2G29120		AT1G66980
AT3G13910	AT2G31350	AT3G17880	AT2G30530	AT3G09020	AT2G31300	AT3G03000	AT2G31810	AT2G44980	AT2G29140		AT1G67000
AT3G13950	AT2G31390	AT3G17900	AT2G30550	AT3G09030	AT2G31305	AT3G03020	AT2G31820	AT2G45010	AT2G29340		AT1G67050
AT3G14020	AT2G31510	AT3G17910	AT2G30590	AT3G09040	AT2G31350	AT3G03070	AT2G31865	AT2G45030	AT2G29350		AT1G67060
AT3G14050	AT2G31585	AT3G17940	AT2G30600	AT3G09180	AT2G31390	AT3G03180	AT2G31870	AT2G45070	AT2G29400		AT1G67070
AT3G14090	AT2G31740	AT3G18035	AT2G30640	AT3G09200	AT2G31400	AT3G03305	AT2G31880	AT2G45140	AT2G29420		AT1G67080
AT3G14120	AT2G31751	AT3G18050	AT2G30710	AT3G09270	AT2G31510	AT3G03310	AT2G31955	AT2G45170	AT2G29460		AT1G67105
AT3G14130	AT2G31800	AT3G18060	AT2G30720	AT3G09300	AT2G31585	AT3G03470	AT2G31960	AT2G45200	AT2G29470		AT1G67120
AT3G14220	AT2G31865	AT3G18080	AT2G30740	AT3G09405	AT2G31740	AT3G03560	AT2G31970	AT2G45240	AT2G29500		AT1G67140
AT3G14225	AT2G31870	AT3G18250	AT2G30770	AT3G09410	AT2G31800	AT3G03570	AT2G31990	AT2G45500	AT2G29640		AT1G67170
AT3G14230	AT2G31880	AT3G18270	AT2G30860	AT3G09470	AT2G31865	AT3G03610	AT2G32020	AT2G45510	AT2G29670		AT1G67190
AT3G14280	AT2G31955	AT3G18350	AT2G30870	AT3G09490	AT2G31870	AT3G03773	AT2G32030	AT2G45540	AT2G29720		AT1G67250
AT3G14290	AT2G31970	AT3G18370	AT2G30880	AT3G09570	AT2G31880	AT3G03855	AT2G32140	AT2G45630	AT2G29950		AT1G67265
AT3G14310	AT2G31990	AT3G18410	AT2G30970	AT3G09690	AT2G31945	AT3G03860	AT2G32160	AT2G45660	AT2G29960		AT1G67300
AT3G14370	AT2G32020	AT3G18430	AT2G30980	AT3G09735	AT2G31955	AT3G03870	AT2G32190	AT2G45680	AT2G29990		AT1G67310
AT3G14410	AT2G32030	AT3G18480	AT2G31020	AT3G09740	AT2G31960	AT3G03890	AT2G32250	AT2G45790	AT2G30020		AT1G67325
AT3G14430	AT2G32080	AT3G18580	AT2G31060	AT3G09810	AT2G31970	AT3G04030	AT2G32260	AT2G45910	AT2G30110		AT1G67328
AT3G14460	AT2G32140	AT3G18680	AT2G31090	AT3G09830	AT2G31990	AT3G04070	AT2G32380	AT2G45980	AT2G30140		AT1G67330
AT3G14470	AT2G32150	AT3G18690	AT2G31110	AT3G09840	AT2G32030	AT3G04080	AT2G32390	AT2G46000	AT2G30250		AT1G67350
AT3G14610	AT2G32160	AT3G18760	AT2G31200	AT3G09940	AT2G32080	AT3G04090	AT2G32487	AT2G46020	AT2G30424		AT1G67360
AT3G14620	AT2G32190	AT3G18830	AT2G31230	AT3G09970	AT2G32130	AT3G04110	AT2G32520	AT2G46060	AT2G30440		AT1G67365
AT3G14840	AT2G32240	AT3G18860	AT2G31300	AT3G10010	AT2G32140	AT3G04181	AT2G32680	AT2G46140	AT2G30530		AT1G67410
AT3G14910	AT2G32250	AT3G18930	AT2G31350	AT3G10120	AT2G32160	AT3G04210	AT2G32700	AT2G46150	AT2G30550		AT1G67420
AT3G14930	AT2G32260	AT3G19010	AT2G31390	AT3G10210	AT2G32190	AT3G04220	AT2G32730	AT2G46170	AT2G30580		AT1G67470
AT3G15000	AT2G32380	AT3G19190	AT2G31400	AT3G10250	AT2G32210	AT3G04350	AT2G32800	AT2G46180	AT2G30590		AT1G67490
AT3G15070	AT2G32400	AT3G19260	AT2G31510	AT3G10260	AT2G32260	AT3G04400	AT2G32810	AT2G46192	AT2G30620		AT1G67500
AT3G15110	AT2G32487	AT3G19380	AT2G31585	AT3G10320	AT2G32380	AT3G04420	AT2G32830	AT2G46200	AT2G30640		AT1G67510
AT3G15160	AT2G32520	AT3G19400	AT2G31650	AT3G10380	AT2G32520	AT3G04480	AT2G32850	AT2G46220	AT2G30740		AT1G67520
AT3G15210	AT2G32530	AT3G19420	AT2G31740	AT3G10500	AT2G32680	AT3G04580	AT2G32870	AT2G46260	AT2G30770		AT1G67550
AT3G15290	AT2G32580	AT3G19460	AT2G31800	AT3G10640	AT2G32700	AT3G04640	AT2G32880	AT2G46270	AT2G30860		AT1G67560
AT3G15355	AT2G32660	AT3G19490	AT2G31865	AT3G10690	AT2G32730	AT3G04670	AT2G32900	AT2G46280	AT2G30870		AT1G67570
AT3G15356	AT2G32680	AT3G19508	AT2G31870	AT3G10720	AT2G32800	AT3G04717	AT2G32920	AT2G46330	AT2G30880		AT1G67620
AT3G15390	AT2G32700	AT3G19540	AT2G31880	AT3G10740	AT2G32810	AT3G04720	AT2G33040	AT2G46390	AT2G30942		AT1G67650
AT3G15450	AT2G32730	AT3G19553	AT2G31945	AT3G10860	AT2G32830	AT3G04880	AT2G33051	AT2G46400	AT2G31020		AT1G67680
AT3G15500	AT2G32800	AT3G19810	AT2G31955	AT3G10915	AT2G32850	AT3G04890	AT2G33080	AT2G46430	AT2G31060		AT1G67740
AT3G15510	AT2G32830	AT3G19860	AT2G31960	AT3G10920	AT2G32885	AT3G04910	AT2G33120	AT2G46440	AT2G31090		AT1G67785
AT3G15518	AT2G32850	AT3G19870	AT2G31970	AT3G10985	AT2G32900	AT3G04930	AT2G33150	AT2G46470	AT2G31200		AT1G67800
AT3G15536	AT2G32900	AT3G19895	AT2G31990	AT3G11010	AT2G32920	AT3G04970	AT2G33170	AT2G46490	AT2G31240		AT1G67810
AT3G15540	AT2G32910	AT3G19910	AT2G32020	AT3G11030	AT2G33040	AT3G05000	AT2G33210	AT2G46500	AT2G31350		AT1G67820
AT3G15580	AT2G32920	AT3G19930	AT2G32030	AT3G11040	AT2G33051	AT3G05090	AT2G33390	AT2G46505	AT2G31390		AT1G67850
AT3G15610	AT2G32970	AT3G20060	AT2G32080	AT3G11080	AT2G33080	AT3G05120	AT2G33470	AT2G46550	AT2G31400		AT1G67856
AT3G15630	AT2G32980	AT3G20080	AT2G32130	AT3G11130	AT2G33120	AT3G05160	AT2G33480	AT2G46560	AT2G31585		AT1G67860
AT3G15640	AT2G33040	AT3G20250	AT2G32140	AT3G11230	AT2G33150	AT3G05200	AT2G33490	AT2G46600	AT2G31740		AT1G67870
AT3G15660	AT2G33050	AT3G20290	AT2G32160	AT3G11270	AT2G33170	AT3G05230	AT2G33580	AT2G46620	AT2G31800		AT1G67880
AT3G15710	AT2G33051	AT3G20395	AT2G32190	AT3G11280	AT2G33210	AT3G05250	AT2G33630	AT2G46900	AT2G31810		AT1G67900
AT3G15730	AT2G33080	AT3G20410	AT2G32250	AT3G11320	AT2G33410	AT3G05360	AT2G33730	AT2G46940	AT2G31820		AT1G67910
AT3G15760	AT2G33120	AT3G20420	AT2G32260	AT3G11402	AT2G33470	AT3G05530	AT2G33830	AT2G47000	AT2G31865		AT1G67920
AT3G15770	AT2G33150	AT3G20440	AT2G32380	AT3G11460	AT2G33490	AT3G05580	AT2G33835	AT2G47130	AT2G31870		AT1G67940
AT3G15840	AT2G33170	AT3G20510	AT2G32400	AT3G11530	AT2G33580	AT3G05660	AT2G33845	AT2G47140	AT2G31880		AT1G67950
AT3G15920	AT2G33390	AT3G20600	AT2G32487	AT3G11540	AT2G33590	AT3G05675	AT2G33990	AT2G47170	AT2G31955		AT1G67960
AT3G15940	AT2G33470	AT3G20630	AT2G32520	AT3G11580	AT2G33600	AT3G05680	AT2G34040	AT2G47210	AT2G31970		AT1G67970
AT3G15980	AT2G33490	AT3G20660	AT2G32680	AT3G11650	AT2G33630	AT3G05690	AT2G34250	AT2G47320	AT2G31990		AT1G67980
AT3G16420	AT2G33580	AT3G20670	AT2G32700	AT3G11770	AT2G33710	AT3G05830	AT2G34400	AT2G47380	AT2G32030		AT1G68000
AT3G16460	AT2G33590	AT3G20770	AT2G32730	AT3G11780	AT2G33730	AT3G05970	AT2G34470	AT2G47390	AT2G32080		AT1G68020
AT3G16530	AT2G33600	AT3G20800	AT2G32800	AT3G11800	AT2G33845	AT3G06050	AT2G34500	AT2G47470	AT2G32140		AT1G68100
AT3G16565	AT2G33610	AT3G20920	AT2G32810	AT3G11810	AT2G34040	AT3G06170	AT2G34580	AT2G47510	AT2G32160		AT1G68110
AT3G16700	AT2G33620	AT3G21080	AT2G32830	AT3G11820	AT2G34250	AT3G06210	AT2G34600	AT2G47640	AT2G32190		AT1G68140
AT3G16720	AT2G33630	AT3G21350	AT2G32850	AT3G11840	AT2G34357	AT3G06300	AT2G34690	AT2G47650	AT2G32210		AT1G68150
AT3G16770	AT2G33710	AT3G21420	AT2G32900	AT3G11850	AT2G34470	AT3G06320	AT2G34840	AT2G47680	AT2G32250		AT1G68160
AT3G16785	AT2G33730	AT3G21465	AT2G32920	AT3G11880	AT2G34500	AT3G06380	AT2G34940	AT2G47690	AT2G32260		AT1G68190
AT3G16990	AT2G33835	AT3G21520	AT2G32980	AT3G11890	AT2G34580	AT3G06440	AT2G34960	AT2G47730	AT2G32380		AT1G68200
AT3G17020	AT2G33845	AT3G21580	AT2G33040	AT3G11910	AT2G34600	AT3G06450	AT2G35000	AT2G47760	AT2G32487		AT1G68300
AT3G17100	AT2G34010	AT3G21610	AT2G33051	AT3G11930	AT2G34730	AT3G06455	AT2G35020	AT2G47800	AT2G32520		AT1G68310
AT3G17240	AT2G34040	AT3G21630	AT2G33080	AT3G11945	AT2G34840	AT3G06470	AT2G35050	AT2G47960	AT2G32680		AT1G68330
AT3G17410	AT2G34250	AT3G21640	AT2G33120	AT3G11960	AT2G34940	AT3G06483	AT2G35060	AT2G47980	AT2G32700		AT1G68370
[truncated: 7,380 more rows]

## Sheet: S5
Hpa-inducible genes showing constitutively enhanced expression in one or more Hpa-resistant epiRILs (Group 1)
148		193		454		508			Shared			Total				Total
48hpi	72hpi	48hpi	72hpi	48hpi	72hpi	48hpi	72hpi		48hpi	72hpi		48hpi	72hpi			48 and 72hpi
AT1G01480	AT1G01140	AT1G01170	AT1G02440	AT1G01220	AT1G01160	AT1G01170	AT1G01160		AT1G01480	AT2G23780		AT1G01170	AT1G01140			AT1G01140
AT1G01730	AT1G01230	AT1G01190	AT1G02780	AT1G01480	AT1G01220	AT1G01480	AT1G01220		AT1G02220	AT4G27410		AT1G01190	AT1G01160			AT1G01160
AT1G02130	AT1G01690	AT1G01480	AT1G03000	AT1G02220	AT1G01690	AT1G02130	AT1G01670		AT1G02780	AT5G13220		AT1G01220	AT1G01220			AT1G01170
AT1G02220	AT1G02370	AT1G02220	AT1G05700	AT1G02430	AT1G01910	AT1G02220	AT1G01690		AT1G07610	AT4G38390		AT1G01480	AT1G01230			AT1G01190
AT1G02270	AT1G02400	AT1G02780	AT1G06060	AT1G02780	AT1G02080	AT1G02370	AT1G01770		AT1G08040	AT3G12200		AT1G01730	AT1G01670			AT1G01220
AT1G02400	AT1G02740	AT1G03130	AT1G06400	AT1G03130	AT1G02520	AT1G02400	AT1G02080		AT1G10095	AT4G09560		AT1G02130	AT1G01690			AT1G01230
AT1G02780	AT1G02780	AT1G03330	AT1G07200	AT1G03220	AT1G02740	AT1G02780	AT1G02780		AT1G12050	AT1G72660		AT1G02220	AT1G01770			AT1G01480
AT1G02850	AT1G03000	AT1G03970	AT1G07210	AT1G03330	AT1G02780	AT1G03030	AT1G03000		AT1G16370	AT5G46210		AT1G02270	AT1G01910			AT1G01690
AT1G03220	AT1G03950	AT1G04820	AT1G07700	AT1G03590	AT1G03000	AT1G03130	AT1G03140		AT1G18190	AT4G26640		AT1G02370	AT1G02080			AT1G01730
AT1G03750	AT1G04490	AT1G05060	AT1G08040	AT1G03680	AT1G03220	AT1G03220	AT1G03220		AT1G19220	AT5G02220		AT1G02400	AT1G02370			AT1G01910
AT1G03820	AT1G05270	AT1G05310	AT1G08465	AT1G03820	AT1G03310	AT1G03330	AT1G03590		AT1G19870	AT2G44850		AT1G02430	AT1G02400			AT1G02080
AT1G03970	AT1G05500	AT1G05620	AT1G08530	AT1G03850	AT1G04010	AT1G03590	AT1G03770		AT1G21480	AT1G66173		AT1G02780	AT1G02440			AT1G02130
AT1G04820	AT1G05560	AT1G05880	AT1G09850	AT1G04310	AT1G05270	AT1G03820	AT1G05500		AT1G22410	AT3G49340		AT1G02850	AT1G02520			AT1G02220
AT1G05310	AT1G05640	AT1G06460	AT1G10560	AT1G05220	AT1G05500	AT1G03970	AT1G05640		AT1G22640	AT3G21420		AT1G03030	AT1G02740			AT1G02270
AT1G05950	AT1G05700	AT1G07610	AT1G11125	AT1G05620	AT1G05640	AT1G04310	AT1G05700		AT1G23000	AT3G07350		AT1G03130	AT1G02780			AT1G02370
AT1G06460	AT1G05950	AT1G07705	AT1G11880	AT1G06110	AT1G05680	AT1G04820	AT1G06060		AT1G26300	AT1G03000		AT1G03220	AT1G03000			AT1G02400
AT1G06620	AT1G06002	AT1G07890	AT1G12050	AT1G06620	AT1G05700	AT1G05060	AT1G06400		AT1G26558	AT3G23080		AT1G03330	AT1G03140			AT1G02430
AT1G06645	AT1G06060	AT1G07900	AT1G12780	AT1G07210	AT1G06110	AT1G05310	AT1G06510		AT1G27150	AT3G12300		AT1G03590	AT1G03220			AT1G02440
AT1G07040	AT1G06400	AT1G08040	AT1G13190	AT1G07610	AT1G06400	AT1G05620	AT1G06645		AT1G27210	AT5G41880		AT1G03680	AT1G03310			AT1G02520
AT1G07610	AT1G06645	AT1G08090	AT1G13450	AT1G07670	AT1G06645	AT1G05700	AT1G07200		AT1G29390	AT2G43400		AT1G03750	AT1G03590			AT1G02740
AT1G07620	AT1G07200	AT1G08530	AT1G13700	AT1G07705	AT1G07230	AT1G06460	AT1G07210		AT1G29465	AT4G02390		AT1G03820	AT1G03770			AT1G02780
AT1G07750	AT1G07530	AT1G09530	AT1G13800	AT1G08040	AT1G07530	AT1G06620	AT1G07230		AT1G31880	AT3G52860		AT1G03850	AT1G03950			AT1G02850
AT1G07890	AT1G07700	AT1G09690	AT1G14205	AT1G08660	AT1G07590	AT1G06645	AT1G07530		AT1G32928	AT4G02500		AT1G03970	AT1G04010			AT1G03000
AT1G07900	AT1G07870	AT1G09920	AT1G14260	AT1G09050	AT1G08040	AT1G07610	AT1G07700		AT1G47710	AT1G55760		AT1G04310	AT1G04490			AT1G03030
AT1G08040	AT1G08040	AT1G10095	AT1G14510	AT1G09080	AT1G08180	AT1G07890	AT1G08040		AT1G52910	AT2G39750		AT1G04820	AT1G05270			AT1G03130
AT1G08940	AT1G08180	AT1G10690	AT1G14530	AT1G09390	AT1G08700	AT1G08040	AT1G08465		AT1G55760	AT2G39110		AT1G05060	AT1G05500			AT1G03220
AT1G09920	AT1G08465	AT1G11020	AT1G14690	AT1G09530	AT1G09200	AT1G08660	AT1G10350		AT1G56230	AT1G76260		AT1G05220	AT1G05560			AT1G03310
AT1G10095	AT1G09850	AT1G11755	AT1G14830	AT1G09690	AT1G10350	AT1G09200	AT1G11880		AT1G61240	AT4G31410		AT1G05310	AT1G05640			AT1G03330
AT1G10690	AT1G10150	AT1G11890	AT1G14890	AT1G09920	AT1G10690	AT1G09530	AT1G11910		AT1G61520	AT4G29310		AT1G05620	AT1G05680			AT1G03590
AT1G10700	AT1G10350	AT1G12050	AT1G14980	AT1G10095	AT1G11125	AT1G09690	AT1G12050		AT1G66173	AT1G65000		AT1G05700	AT1G05700			AT1G03680
AT1G10760	AT1G10865	AT1G12790	AT1G14990	AT1G10590	AT1G11880	AT1G10095	AT1G12680		AT1G66580	AT3G63210		AT1G05880	AT1G05950			AT1G03750
AT1G10865	AT1G11125	AT1G12910	AT1G15175	AT1G11050	AT1G12000	AT1G10760	AT1G12780		AT1G70350	AT5G07890		AT1G05950	AT1G06002			AT1G03820
AT1G11050	AT1G12680	AT1G13260	AT1G15350	AT1G11755	AT1G12050	AT1G11020	AT1G12910		AT1G70940	AT5G54540		AT1G06110	AT1G06060			AT1G03850
AT1G11840	AT1G13800	AT1G13270	AT1G16150	AT1G11840	AT1G12140	AT1G11050	AT1G13090		AT1G71310	AT3G21060		AT1G06460	AT1G06110			AT1G03950
AT1G12050	AT1G13860	AT1G14250	AT1G16270	AT1G12050	AT1G12680	AT1G11880	AT1G13190		AT1G71890	AT5G39720		AT1G06620	AT1G06400			AT1G03970
AT1G12400	AT1G14130	AT1G15580	AT1G17230	AT1G12790	AT1G13190	AT1G11940	AT1G13450		AT1G74370	AT3G18140		AT1G06645	AT1G06510			AT1G04010
AT1G12845	AT1G14205	AT1G16370	AT1G17440	AT1G12845	AT1G13570	AT1G12050	AT1G13570		AT1G74940	AT1G28540		AT1G07040	AT1G06645			AT1G04310
AT1G13340	AT1G14260	AT1G16810	AT1G18350	AT1G12970	AT1G13940	AT1G12400	AT1G13800		AT1G76660	AT4G27710		AT1G07210	AT1G07200			AT1G04490
AT1G14000	AT1G14570	AT1G17970	AT1G18540	AT1G13260	AT1G14205	AT1G12790	AT1G13940		AT1G78380	AT5G60680		AT1G07610	AT1G07210			AT1G04820
AT1G14230	AT1G14690	AT1G18190	AT1G19000	AT1G13700	AT1G14340	AT1G12845	AT1G14140		AT1G79610	AT1G68920		AT1G07620	AT1G07230			AT1G05060
AT1G14250	AT1G14830	AT1G18400	AT1G19220	AT1G14250	AT1G14400	AT1G13700	AT1G14205		AT1G80110	AT1G62430		AT1G07670	AT1G07530			AT1G05220
AT1G14870	AT1G14980	AT1G18540	AT1G19770	AT1G14620	AT1G14510	AT1G14580	AT1G14510		AT1G80400	AT2G38010		AT1G07705	AT1G07590			AT1G05270
AT1G14980	AT1G15010	AT1G18640	AT1G21480	AT1G15175	AT1G14530	AT1G14620	AT1G14530		AT1G80440	AT3G47850		AT1G07750	AT1G07700			AT1G05310
AT1G15580	AT1G15175	AT1G18700	AT1G21590	AT1G16000	AT1G14570	AT1G15175	AT1G14570		AT1G80720	AT1G55000		AT1G07890	AT1G07870			AT1G05500
AT1G16370	AT1G15310	AT1G19120	AT1G21760	AT1G16370	AT1G14690	AT1G16370	AT1G14690		AT2G01420	AT1G61000		AT1G07900	AT1G08040			AT1G05560
AT1G16810	AT1G15350	AT1G19180	AT1G21830	AT1G17160	AT1G14890	AT1G17860	AT1G14830		AT2G02540	AT5G07810		AT1G08040	AT1G08180			AT1G05620
AT1G17145	AT1G15370	AT1G19220	AT1G21920	AT1G17970	AT1G15175	AT1G17970	AT1G15010		AT2G17780	AT4G22310		AT1G08090	AT1G08465			AT1G05640
AT1G17745	AT1G15580	AT1G19870	AT1G22370	AT1G18030	AT1G15310	AT1G18030	AT1G15175		AT2G18010	AT4G27760		AT1G08530	AT1G08530			AT1G05680
AT1G17860	AT1G15810	AT1G20020	AT1G22640	AT1G18190	AT1G16270	AT1G18190	AT1G15310		AT2G18040	AT1G08040		AT1G08660	AT1G08700			AT1G05700
AT1G18190	AT1G15860	AT1G21440	AT1G22790	AT1G18580	AT1G16810	AT1G18500	AT1G15350		AT2G20360	AT4G38825		AT1G08940	AT1G09200			AT1G05880
AT1G18500	AT1G16810	AT1G21480	AT1G23052	AT1G18620	AT1G17440	AT1G18580	AT1G15780		AT2G20990	AT1G79590		AT1G09050	AT1G09850			AT1G05950
AT1G19120	AT1G17230	AT1G22370	AT1G23080	AT1G18640	AT1G17580	AT1G18620	AT1G15810		AT2G24755	AT5G45840		AT1G09080	AT1G10150			AT1G06002
AT1G19180	AT1G17280	AT1G22410	AT1G23170	AT1G19220	AT1G17640	AT1G18640	AT1G16270		AT2G26710	AT2G46490		AT1G09200	AT1G10350			AT1G06060
AT1G19220	AT1G17490	AT1G22640	AT1G26800	AT1G19670	AT1G18190	AT1G18700	AT1G16810		AT2G27330	AT5G64160		AT1G09390	AT1G10560			AT1G06110
AT1G19380	AT1G17640	AT1G23000	AT1G26840	AT1G19870	AT1G18540	AT1G19180	AT1G17230		AT2G28370	AT3G29670		AT1G09530	AT1G10690			AT1G06400
AT1G19870	AT1G17930	AT1G23052	AT1G26900	AT1G20020	AT1G18640	AT1G19220	AT1G17280		AT2G29680	AT1G05700		AT1G09690	AT1G10865			AT1G06460
AT1G19910	AT1G17970	AT1G23060	AT1G27290	AT1G20200	AT1G19000	AT1G19380	AT1G17440		AT2G30920	AT5G60370		AT1G09920	AT1G11125			AT1G06620
AT1G20510	AT1G18350	AT1G23390	AT1G27300	AT1G21050	AT1G19170	AT1G19770	AT1G17490		AT2G32020	AT4G02540		AT1G10095	AT1G11880			AT1G06645
AT1G20880	AT1G18470	AT1G23710	AT1G27385	AT1G21326	AT1G19770	AT1G19870	AT1G17580		AT2G32170	AT3G59940		AT1G10590	AT1G11910			AT1G07040
AT1G21310	AT1G18540	AT1G23850	AT1G27840	AT1G21440	AT1G20110	AT1G20510	AT1G17640		AT2G34480	AT1G63000		AT1G10690	AT1G12000			AT1G07200
AT1G21480	AT1G19000	AT1G26300	AT1G28540	AT1G21480	AT1G20160	AT1G20880	AT1G17970		AT2G36080	AT3G05510		AT1G10700	AT1G12050			AT1G07210
AT1G22410	AT1G19170	AT1G26558	AT1G29550	AT1G21500	AT1G21480	AT1G21326	AT1G18190		AT2G36780	AT1G77450		AT1G10760	AT1G12140			AT1G07230
AT1G22640	AT1G19220	AT1G26840	AT1G29850	AT1G21830	AT1G21590	AT1G21440	AT1G18350		AT2G38170	AT1G18540		AT1G10865	AT1G12680			AT1G07530
AT1G23000	AT1G19290	AT1G27150	AT1G30200	AT1G21840	AT1G21700	AT1G21480	AT1G18540		AT2G38530	AT3G22425		AT1G11020	AT1G12780			AT1G07590
AT1G23060	AT1G19380	AT1G27210	AT1G31340	AT1G22370	AT1G21830	AT1G21830	AT1G19170		AT2G38580	AT2G39700		AT1G11050	AT1G12910			AT1G07610
AT1G23190	AT1G19397	AT1G27290	AT1G32170	AT1G22410	AT1G22370	AT1G21840	AT1G19290		AT2G38820	AT5G18290		AT1G11755	AT1G13090			AT1G07620
AT1G23850	AT1G19670	AT1G27435	AT1G32270	AT1G22640	AT1G22640	AT1G22370	AT1G19300		AT2G39410	AT5G42860		AT1G11840	AT1G13190			AT1G07670
AT1G24140	AT1G20225	AT1G27730	AT1G33250	AT1G23000	AT1G22790	AT1G22410	AT1G19397		AT2G39650	AT5G10440		AT1G11880	AT1G13450			AT1G07700
AT1G25540	AT1G20350	AT1G28150	AT1G33475	AT1G23260	AT1G23390	AT1G22640	AT1G19430		AT2G39750	AT1G54580		AT1G11890	AT1G13570			AT1G07705
AT1G25550	AT1G20460	AT1G28370	AT1G33490	AT1G23710	AT1G25550	AT1G23000	AT1G19770		AT2G42490	AT5G63480		AT1G11940	AT1G13700			AT1G07750
AT1G26300	AT1G21480	AT1G29060	AT1G33610	AT1G23870	AT1G26300	AT1G23052	AT1G20110		AT2G42590	AT3G60340		AT1G12050	AT1G13800			AT1G07870
AT1G26390	AT1G21590	AT1G29390	AT1G33612	AT1G24090	AT1G26460	AT1G23390	AT1G20160		AT2G42640	AT1G21480		AT1G12400	AT1G13860			AT1G07890
AT1G26558	AT1G21700	AT1G29460	AT1G33770	AT1G25230	AT1G26840	AT1G23710	AT1G20225		AT2G42960	AT1G75440		AT1G12790	AT1G13940			AT1G07900
AT1G26750	AT1G21760	AT1G29465	AT1G34760	AT1G25540	AT1G27290	AT1G23870	AT1G20460		AT2G43870	AT5G24270		AT1G12845	AT1G14130			AT1G08040
AT1G26840	AT1G21910	AT1G29920	AT1G35670	AT1G26300	AT1G27320	AT1G24575	AT1G20760		AT2G44740	AT5G15940		AT1G12910	AT1G14140			AT1G08090
AT1G27150	AT1G22370	AT1G30300	AT1G36940	AT1G26460	AT1G27385	AT1G25230	AT1G21480		AT2G45600	AT3G26510		AT1G12970	AT1G14205			AT1G08180
AT1G27210	AT1G22640	AT1G30510	AT1G43160	AT1G26558	AT1G27840	AT1G26300	AT1G21700		AT3G01390	AT5G61440		AT1G13260	AT1G14260			AT1G08465
AT1G27730	AT1G22790	AT1G30630	AT1G45233	AT1G26840	AT1G28540	AT1G26460	AT1G21760		AT3G02080	AT5G04490		AT1G13270	AT1G14340			AT1G08530
AT1G27770	AT1G23052	AT1G30850	AT1G47128	AT1G27150	AT1G28570	AT1G26558	AT1G21830		AT3G04060	AT4G23730		AT1G13340	AT1G14400			AT1G08660
AT1G27930	AT1G23060	AT1G31340	AT1G47710	AT1G27210	AT1G29550	AT1G26750	AT1G21920		AT3G05420	AT2G07671		AT1G13700	AT1G14510			AT1G08700
AT1G27970	AT1G23080	AT1G31570	AT1G48280	AT1G27290	AT1G29750	AT1G27130	AT1G22360		AT3G06590	AT1G66480		AT1G14000	AT1G14530			AT1G08940
AT1G28200	AT1G23170	AT1G31880	AT1G48360	AT1G27435	AT1G30040	AT1G27150	AT1G22540		AT3G10815	AT4G32960		AT1G14230	AT1G14570			AT1G09050
AT1G29150	AT1G23780	AT1G32170	AT1G49130	AT1G28370	AT1G30100	AT1G27210	AT1G22640		AT3G10930	AT5G01430		AT1G14250	AT1G14690			AT1G09080
AT1G29260	AT1G24575	AT1G32928	AT1G49180	AT1G29260	AT1G30510	AT1G27290	AT1G22790		AT3G11570	AT4G01026		AT1G14580	AT1G14830			AT1G09200
AT1G29290	AT1G24625	AT1G33055	AT1G49730	AT1G29390	AT1G30820	AT1G28150	AT1G23052		AT3G13677	AT2G18650		AT1G14620	AT1G14890			AT1G09390
AT1G29390	AT1G25550	AT1G33120	AT1G50520	AT1G29465	AT1G31880	AT1G28370	AT1G23390		AT3G15540	AT2G31130		AT1G14870	AT1G14980			AT1G09530
AT1G29460	AT1G26800	AT1G33265	AT1G51140	AT1G29490	AT1G32170	AT1G29290	AT1G23780		AT3G15610	AT2G30920		AT1G14980	AT1G14990			AT1G09690
AT1G29465	AT1G26840	AT1G33780	AT1G51170	AT1G29690	AT1G33250	AT1G29390	AT1G26900		AT3G18140	AT3G51040		AT1G15175	AT1G15010			AT1G09850
AT1G29690	AT1G27385	AT1G34270	AT1G51740	AT1G29750	AT1G33475	AT1G29465	AT1G27290		AT3G18170	AT1G49130		AT1G15580	AT1G15175			AT1G09920
AT1G29715	AT1G27970	AT1G35612	AT1G51913	AT1G29920	AT1G33490	AT1G29690	AT1G27300		AT3G20390	AT5G54855		AT1G16000	AT1G15310			AT1G10095
AT1G29920	AT1G28230	AT1G44170	AT1G52260	AT1G30300	AT1G33612	AT1G29910	AT1G27320		AT3G24830	AT1G02780		AT1G16370	AT1G15350			AT1G10150
AT1G30510	AT1G28540	AT1G47290	AT1G52315	AT1G30510	AT1G33770	AT1G29990	AT1G27385		AT3G27310	AT1G14205		AT1G16810	AT1G15370			AT1G10350
AT1G30630	AT1G28570	AT1G47310	AT1G53100	AT1G30820	AT1G35320	AT1G30300	AT1G27840		AT3G27500	AT3G60410		AT1G17145	AT1G15580			AT1G10560
AT1G30720	AT1G29260	AT1G47550	AT1G53625	AT1G30850	AT1G36620	AT1G30820	AT1G28230		AT3G27970	AT2G03440		AT1G17160	AT1G15780			AT1G10590
AT1G31340	AT1G29550	AT1G47710	AT1G53920	AT1G30890	AT1G36940	AT1G30850	AT1G28250		AT3G45140	AT1G22640		AT1G17745	AT1G15810			AT1G10690
AT1G31570	AT1G30100	AT1G48570	AT1G54390	AT1G31010	AT1G43690	AT1G31330	AT1G28490		AT3G46320	AT1G54390		AT1G17860	AT1G15860			AT1G10700
AT1G31820	AT1G30200	AT1G49500	AT1G54410	AT1G31330	AT1G45233	AT1G31340	AT1G28540		AT3G47350	AT3G17820		AT1G17970	AT1G16150			AT1G10760
AT1G31880	AT1G30510	AT1G50010	AT1G54580	AT1G31880	AT1G47128	AT1G31570	AT1G29260		AT3G52630	AT2G46540		AT1G18030	AT1G16270			AT1G10865
AT1G32928	AT1G31280	AT1G50120	AT1G54630	AT1G32928	AT1G47330	AT1G31820	AT1G29550		AT3G53370	AT1G49730		AT1G18190	AT1G16810			AT1G11020
AT1G32960	AT1G31340	AT1G50940	AT1G54680	AT1G33055	AT1G48790	AT1G31880	AT1G29750		AT3G54030	AT5G03230		AT1G18400	AT1G17230			AT1G11050
AT1G33120	AT1G31570	AT1G51550	AT1G54710	AT1G33265	AT1G48970	AT1G32170	AT1G30090		AT3G54160	AT1G62040		AT1G18500	AT1G17280			AT1G11125
AT1G33265	AT1G31730	AT1G51913	AT1G55000	AT1G33400	AT1G49130	AT1G32928	AT1G30100		AT3G55560	AT5G03030		AT1G18540	AT1G17440			AT1G11755
AT1G33560	AT1G33490	AT1G52260	AT1G55365	AT1G33420	AT1G49180	AT1G33055	AT1G31340		AT3G56880	AT1G06400		AT1G18580	AT1G17490			AT1G11840
AT1G33590	AT1G33770	AT1G52347	AT1G55760	AT1G33560	AT1G49730	AT1G33600	AT1G31570		AT3G57760	AT1G80670		AT1G18620	AT1G17580			AT1G11880
AT1G33600	AT1G33780	AT1G52720	AT1G55880	AT1G33730	AT1G50520	AT1G33770	AT1G33250		AT3G63290	AT5G24890		AT1G18640	AT1G17640			AT1G11890
AT1G33730	AT1G34630	AT1G52910	AT1G56150	AT1G33780	AT1G51170	AT1G34020	AT1G33490		AT4G00420	AT3G02700		AT1G18700	AT1G17930			AT1G11940
AT1G33780	AT1G34760	AT1G53180	AT1G56423	AT1G34760	AT1G51550	AT1G34060	AT1G33780		AT4G04780	AT1G22790		AT1G19120	AT1G17970			AT1G12000
AT1G34020	AT1G43160	AT1G53580	AT1G58420	AT1G35612	AT1G52315	AT1G34270	AT1G34060		AT4G09560	AT4G36032		AT1G19180	AT1G18190			AT1G12050
AT1G34044	AT1G43690	AT1G53887	AT1G60970	AT1G35670	AT1G53170	AT1G34760	AT1G34630		AT4G09760	AT5G51370		AT1G19220	AT1G18350			AT1G12140
AT1G34270	AT1G44350	AT1G54000	AT1G61000	AT1G35720	AT1G53580	AT1G35612	AT1G36620		AT4G09800	AT3G53960		AT1G19380	AT1G18470			AT1G12400
AT1G35350	AT1G47330	AT1G54250	AT1G61160	AT1G45000	AT1G54390	AT1G35670	AT1G43160		AT4G10140	AT3G55240		AT1G19670	AT1G18540			AT1G12680
AT1G36622	AT1G47480	AT1G54440	AT1G62040	AT1G45332	AT1G54580	AT1G44170	AT1G43690		AT4G10330	AT4G31398		AT1G19770	AT1G18640			AT1G12780
AT1G43910	AT1G47710	AT1G55080	AT1G62430	AT1G47290	AT1G54680	AT1G45000	AT1G47128		AT4G11280	AT1G15175		AT1G19870	AT1G19000			AT1G12790
AT1G44170	AT1G47960	AT1G55130	AT1G63000	AT1G47550	AT1G55000	AT1G47710	AT1G47330		AT4G13250	AT1G33490		AT1G19910	AT1G19170			AT1G12845
AT1G47710	AT1G48120	AT1G55760	AT1G63220	AT1G47710	AT1G55265	AT1G48380	AT1G47710		AT4G14880	AT5G16690		AT1G20020	AT1G19220			AT1G12910
AT1G47860	AT1G48360	AT1G55790	AT1G64200	AT1G48160	AT1G55365	AT1G49170	AT1G47960		AT4G18210	AT5G08520		AT1G20200	AT1G19290			AT1G12970
AT1G48140	AT1G48380	AT1G56230	AT1G64750	AT1G48380	AT1G55760	AT1G49500	AT1G48360		AT4G19170	AT3G55440		AT1G20510	AT1G19300			AT1G13190
AT1G48380	AT1G49130	AT1G57590	AT1G65000	AT1G49350	AT1G56090	AT1G51170	AT1G48380		AT4G19865	AT1G74930		AT1G20880	AT1G19380			AT1G13260
AT1G50010	AT1G49730	AT1G59560	AT1G65500	AT1G49730	AT1G57590	AT1G51390	AT1G48790		AT4G20030	AT3G11590		AT1G21050	AT1G19397			AT1G13270
AT1G51170	AT1G49970	AT1G59600	AT1G65730	AT1G50010	AT1G58110	AT1G51400	AT1G49130		AT4G20380	AT3G57580		AT1G21310	AT1G19430			AT1G13340
AT1G51390	AT1G51170	AT1G60780	AT1G65845	AT1G50120	AT1G60070	AT1G51550	AT1G49180		AT4G24210	AT4G14905		AT1G21326	AT1G19670			AT1G13450
AT1G51550	AT1G51540	AT1G60940	AT1G65850	AT1G50940	AT1G60970	AT1G51760	AT1G49730		AT4G24370	AT5G43980		AT1G21440	AT1G19770			AT1G13570
AT1G51620	AT1G51550	AT1G61240	AT1G65960	AT1G51390	AT1G61000	AT1G51820	AT1G51170		AT4G27280	AT3G48590		AT1G21480	AT1G20110			AT1G13700
AT1G51660	AT1G51670	AT1G61260	AT1G66173	AT1G51400	AT1G61030	AT1G52220	AT1G51550		AT4G27960	AT5G05080		AT1G21500	AT1G20160			AT1G13800
AT1G51760	AT1G51913	AT1G61520	AT1G66480	AT1G52220	AT1G61160	AT1G52270	AT1G51670		AT4G32460	AT1G29550		AT1G21830	AT1G20225			AT1G13860
AT1G51820	AT1G52315	AT1G62430	AT1G67325	AT1G52260	AT1G61780	AT1G52347	AT1G52720		AT4G32605	AT3G11650		AT1G21840	AT1G20350			AT1G13940
AT1G51860	AT1G52890	AT1G63220	AT1G67820	AT1G52270	AT1G62040	AT1G52720	AT1G53170		AT4G34200	AT5G27710		AT1G22370	AT1G20460			AT1G14000
AT1G52270	AT1G53400	AT1G63690	AT1G67900	AT1G52910	AT1G62330	AT1G52910	AT1G53560		AT4G34215	AT5G39360		AT1G22410	AT1G20760			AT1G14130
AT1G52910	AT1G53580	AT1G65390	AT1G67950	AT1G53170	AT1G62430	AT1G53170	AT1G53580		AT4G38420	AT4G03115		AT1G22640	AT1G21480			AT1G14205
AT1G53170	AT1G54210	AT1G65610	AT1G68190	AT1G53400	AT1G62820	AT1G53180	AT1G53625		AT5G01600	AT1G60970		AT1G23000	AT1G21590			AT1G14230
AT1G53590	AT1G54390	AT1G65960	AT1G68310	AT1G53590	AT1G63000	AT1G53400	AT1G54390		AT5G02570	AT3G58170		AT1G23052	AT1G21700			AT1G14250
AT1G53830	AT1G54410	AT1G66090	AT1G68840	AT1G53887	AT1G63090	AT1G53580	AT1G54580		AT5G05620	AT5G58740		AT1G23060	AT1G21760			AT1G14260
AT1G54410	AT1G54580	AT1G66160	AT1G68920	AT1G54250	AT1G63220	AT1G53590	AT1G54680		AT5G05790	AT3G50850		AT1G23190	AT1G21830			AT1G14340
AT1G54580	AT1G54630	AT1G66173	AT1G69030	AT1G54440	AT1G64572	AT1G54090	AT1G55000		AT5G06930	AT2G03310		AT1G23260	AT1G21910			AT1G14400
AT1G55760	AT1G55000	AT1G66580	AT1G69485	AT1G54580	AT1G65000	AT1G54130	AT1G55230		AT5G07590	AT3G22930		AT1G23390	AT1G21920			AT1G14510
AT1G55790	AT1G55230	AT1G67050	AT1G69510	AT1G55130	AT1G65960	AT1G54250	AT1G55265		AT5G07810	AT1G51170		AT1G23710	AT1G22360			AT1G14530
AT1G56010	AT1G55760	AT1G67900	AT1G69850	AT1G55760	AT1G66173	AT1G54440	AT1G55325		AT5G08320	AT1G71970		AT1G23850	AT1G22370			AT1G14570
AT1G56230	AT1G55880	AT1G68190	AT1G70740	AT1G56230	AT1G66480	AT1G54580	AT1G55365		AT5G10030	AT4G04409		AT1G23870	AT1G22540			AT1G14580
AT1G57590	AT1G56090	AT1G68330	AT1G70940	AT1G57590	AT1G67300	AT1G55130	AT1G55760		AT5G11280	AT2G43760		AT1G24090	AT1G22640			AT1G14620
AT1G58225	AT1G56150	AT1G68680	AT1G71030	AT1G58200	AT1G67420	AT1G55760	AT1G56090		AT5G11290	AT4G08330		AT1G24140	AT1G22790			AT1G14690
AT1G58420	AT1G56650	AT1G68840	AT1G71410	AT1G58300	AT1G67950	AT1G56230	AT1G56150		AT5G12140	AT2G31751		AT1G24575	AT1G23052			AT1G14830
AT1G60730	AT1G58420	AT1G69370	AT1G71530	AT1G59620	AT1G68200	AT1G58200	AT1G56250		AT5G14590	AT5G64910		AT1G25230	AT1G23060			AT1G14870
AT1G60780	AT1G60970	AT1G69490	AT1G71865	AT1G59990	AT1G68840	AT1G60940	AT1G56423		AT5G15650	AT5G53340		AT1G25540	AT1G23080			AT1G14890
AT1G61240	AT1G61000	AT1G69510	AT1G71880	AT1G60140	AT1G68920	AT1G61240	AT1G56650		AT5G16050	AT5G63280		AT1G25550	AT1G23170			AT1G14980
AT1G61260	AT1G61120	AT1G69620	AT1G71890	AT1G60780	AT1G69370	AT1G61520	AT1G57590		AT5G18010	AT1G27385		AT1G26300	AT1G23390			AT1G14990
AT1G61520	AT1G61160	AT1G69830	AT1G71970	AT1G61240	AT1G69390	AT1G62430	AT1G60070		AT5G19070	AT1G14690		AT1G26390	AT1G23780			AT1G15010
AT1G62810	AT1G61610	AT1G69910	AT1G72660	AT1G61520	AT1G69485	AT1G62820	AT1G60970		AT5G20830	AT1G80400		AT1G26460	AT1G24575			AT1G15175
AT1G63720	AT1G62040	AT1G70290	AT1G72820	AT1G62820	AT1G69510	AT1G63690	AT1G61000		AT5G20900	AT5G08060		AT1G26558	AT1G24625			AT1G15310
AT1G63860	AT1G62330	AT1G70300	AT1G72840	AT1G63220	AT1G69740	AT1G63900	AT1G61030		AT5G21940	AT3G48880		AT1G26750	AT1G25550			AT1G15350
AT1G63900	AT1G62430	AT1G70350	AT1G73750	AT1G63690	AT1G70290	AT1G65390	AT1G61255		AT5G26940	AT3G03340		AT1G26840	AT1G26300			AT1G15370
AT1G65250	AT1G62820	AT1G70940	AT1G73830	AT1G64460	AT1G70490	AT1G65610	AT1G61780		AT5G27520	AT5G44569		AT1G27130	AT1G26460			AT1G15580
AT1G65390	AT1G62880	AT1G71310	AT1G74930	AT1G64470	AT1G71030	AT1G65690	AT1G62040		AT5G37420	AT1G69485		AT1G27150	AT1G26800			AT1G15810
AT1G65500	AT1G63000	AT1G71440	AT1G75370	AT1G65960	AT1G71530	AT1G66160	AT1G62370		AT5G40650	AT3G07930		AT1G27210	AT1G26840			AT1G15860
AT1G65610	AT1G63750	AT1G71890	AT1G75440	AT1G66090	AT1G71970	AT1G66173	AT1G62430		AT5G41590	AT4G15210		AT1G27290	AT1G26900			AT1G16000
AT1G65690	AT1G64190	AT1G71950	AT1G75490	AT1G66173	AT1G72010	AT1G66580	AT1G62570		AT5G42840	AT5G57660		AT1G27435	AT1G27290			AT1G16150
AT1G65960	AT1G64200	AT1G72160	AT1G75500	AT1G66580	AT1G72660	AT1G66900	AT1G62820		AT5G42860	AT5G65207		AT1G27730	AT1G27300			AT1G16270
AT1G65970	AT1G64572	AT1G72630	AT1G76260	AT1G66900	AT1G72690	AT1G67050	AT1G62880		AT5G44005	AT5G56840		AT1G27770	AT1G27320			AT1G16370
AT1G66090	AT1G64750	AT1G72910	AT1G77450	AT1G66960	AT1G72855	AT1G68190	AT1G63000		AT5G47370	AT5G12230		AT1G27930	AT1G27385			AT1G16810
AT1G66160	AT1G65000	AT1G72920	AT1G78570	AT1G67050	AT1G72870	AT1G68620	AT1G63750		AT5G47900	AT5G22400		AT1G27970	AT1G27840			AT1G17145
AT1G66173	AT1G65410	AT1G72940	AT1G78890	AT1G67140	AT1G72950	AT1G68680	AT1G63800		AT5G49525	AT3G23635		AT1G28150	AT1G27970			AT1G17160
AT1G66580	AT1G65500	AT1G73210	AT1G79440	AT1G67190	AT1G73720	AT1G68840	AT1G64200		AT5G50850	AT3G23030		AT1G28200	AT1G28230			AT1G17230
AT1G66920	AT1G65730	AT1G73750	AT1G79590	AT1G67900	AT1G73750	AT1G69030	AT1G64563		AT5G52545	AT5G08590		AT1G28370	AT1G28250			AT1G17280
AT1G66960	AT1G66173	AT1G73830	AT1G80320	AT1G68190	AT1G73920	AT1G69360	AT1G64572		AT5G53120	AT3G50270		AT1G29060	AT1G28490			AT1G17440
AT1G67000	AT1G66480	AT1G73920	AT1G80400	AT1G68840	AT1G74930	AT1G69490	AT1G65000		AT5G54190	AT1G73750		AT1G29150	AT1G28540			AT1G17490
AT1G67350	AT1G67300	AT1G74370	AT1G80450	AT1G69360	AT1G75370	AT1G69510	AT1G65483		AT5G55190	AT2G43680		AT1G29260	AT1G28570			AT1G17580
AT1G67500	AT1G67900	AT1G74940	AT1G80650	AT1G69370	AT1G75440	AT1G69620	AT1G65850		AT5G55500			AT1G29290	AT1G29260			AT1G17640
AT1G67900	AT1G68190	AT1G75220	AT1G80670	AT1G69510	AT1G75490	AT1G69780	AT1G66173		AT5G60190			AT1G29390	AT1G29550			AT1G17745
AT1G67920	AT1G68310	AT1G75460	AT1G80900	AT1G69530	AT1G76260	AT1G69910	AT1G66480		AT5G63400			AT1G29460	AT1G29750			AT1G17860
AT1G67940	AT1G68920	AT1G76660	AT2G01020	AT1G69780	AT1G76320	AT1G69930	AT1G67300		AT5G64350			AT1G29465	AT1G29850			AT1G17930
AT1G67960	AT1G69030	AT1G76730	AT2G01100	AT1G69830	AT1G76900	AT1G70290	AT1G67325		AT5G65050			AT1G29490	AT1G30040			AT1G17970
AT1G67980	AT1G69370	AT1G76790	AT2G01140	AT1G69930	AT1G77450	AT1G70300	AT1G67820		AT5G65440			AT1G29690	AT1G30090			AT1G18030
AT1G68330	AT1G69485	AT1G77000	AT2G02180	AT1G69980	AT1G77480	AT1G70350	AT1G67950		AT5G66650			AT1G29715	AT1G30100			AT1G18190
AT1G68620	AT1G69790	AT1G77765	AT2G02760	AT1G70290	AT1G78890	AT1G70740	AT1G68330					AT1G29750	AT1G30200			AT1G18350
AT1G68680	AT1G70150	AT1G78370	AT2G03310	AT1G70350	AT1G78900	AT1G70800	AT1G68390					AT1G29910	AT1G30510			AT1G18400
AT1G68765	AT1G70581	AT1G78380	AT2G03440	AT1G70490	AT1G79440	AT1G70940	AT1G68920					AT1G29920	AT1G30820			AT1G18470
AT1G68820	AT1G71940	AT1G79530	AT2G03590	AT1G70740	AT1G79590	AT1G71260	AT1G69030					AT1G29990	AT1G31280			AT1G18500
AT1G69360	AT1G71970	AT1G79610	AT2G03690	AT1G70940	AT1G79870	AT1G71310	AT1G69370					AT1G30300	AT1G31340			AT1G18540
AT1G69370	AT1G72220	AT1G79990	AT2G05160	AT1G71260	AT1G80320	AT1G71890	AT1G69390					AT1G30510	AT1G31570			AT1G18580
AT1G69410	AT1G72450	AT1G80110	AT2G05630	AT1G71310	AT1G80400	AT1G71970	AT1G69485					AT1G30630	AT1G31730			AT1G18620
AT1G69490	AT1G72660	AT1G80310	AT2G07671	AT1G71440	AT1G80450	AT1G72160	AT1G69510					AT1G30720	AT1G31880			AT1G18640
AT1G69620	AT1G72690	AT1G80400	AT2G16660	AT1G71865	AT1G80670	AT1G72175	AT1G69740					AT1G30820	AT1G32170			AT1G18700
AT1G69830	AT1G72710	AT1G80440	AT2G16930	AT1G71890	AT2G01100	AT1G72630	AT1G69780					AT1G30850	AT1G32270			AT1G19000
AT1G69900	AT1G72820	AT1G80600	AT2G17450	AT1G73210	AT2G02050	AT1G72940	AT1G69790					AT1G30890	AT1G33250			AT1G19120
AT1G69930	AT1G72840	AT1G80720	AT2G17560	AT1G73790	AT2G03310	AT1G73790	AT1G69850					AT1G31010	AT1G33475			AT1G19170
AT1G70300	AT1G73720	AT1G80840	AT2G17880	AT1G74370	AT2G03440	AT1G74370	AT1G70290					AT1G31330	AT1G33490			AT1G19180
AT1G70350	AT1G73750	AT1G80900	AT2G18650	AT1G74910	AT2G04550	AT1G74910	AT1G70330					AT1G31340	AT1G33610			AT1G19220
AT1G70940	AT1G74930	AT1G80950	AT2G18960	AT1G74930	AT2G05160	AT1G74930	AT1G70581					AT1G31570	AT1G33612			AT1G19290
AT1G71310	AT1G75420	AT2G01420	AT2G19350	AT1G74940	AT2G07671	AT1G74940	AT1G70750					AT1G31820	AT1G33770			AT1G19380
AT1G71410	AT1G75440	AT2G01930	AT2G20330	AT1G75440	AT2G13130	AT1G75220	AT1G70820					AT1G31880	AT1G33780			AT1G19397
AT1G71890	AT1G75500	AT2G02450	AT2G20370	AT1G76100	AT2G14290	AT1G75440	AT1G71030					AT1G32170	AT1G34060			AT1G19670
AT1G71950	AT1G76260	AT2G02540	AT2G22690	AT1G76185	AT2G16740	AT1G75500	AT1G71410					AT1G32928	AT1G34630			AT1G19770
AT1G72830	AT1G76320	AT2G03220	AT2G22830	AT1G76600	AT2G17450	AT1G75760	AT1G71440					AT1G32960	AT1G34760			AT1G19870
AT1G72920	AT1G77450	AT2G03330	AT2G23780	AT1G76640	AT2G17500	AT1G76100	AT1G71530					AT1G33055	AT1G35320			AT1G19910
AT1G72940	AT1G77480	AT2G03440	AT2G23840	AT1G76660	AT2G17700	AT1G76600	AT1G71865					AT1G33120	AT1G35670			AT1G20020
AT1G73210	AT1G78570	AT2G03620	AT2G24160	AT1G76730	AT2G17880	AT1G76660	AT1G71880					AT1G33265	AT1G36620			AT1G20110
AT1G73750	AT1G78670	AT2G05160	AT2G25200	AT1G76790	AT2G18010	AT1G76680	AT1G71890					AT1G33400	AT1G36940			AT1G20160
AT1G73920	AT1G78910	AT2G05630	AT2G25300	AT1G77350	AT2G18650	AT1G76930	AT1G71970					AT1G33420	AT1G43160			AT1G20200
AT1G74370	AT1G79590	AT2G14620	AT2G25450	AT1G77460	AT2G18700	AT1G77460	AT1G72010					AT1G33560	AT1G43690			AT1G20225
AT1G74650	AT1G79870	AT2G15760	AT2G25470	AT1G77750	AT2G18960	AT1G78380	AT1G72220					AT1G33590	AT1G44350			AT1G20350
AT1G74940	AT1G80110	AT2G17450	AT2G26260	AT1G77765	AT2G19250	AT1G78850	AT1G72660					AT1G33600	AT1G45233			AT1G20460
AT1G75220	AT1G80400	AT2G17560	AT2G26710	AT1G78380	AT2G19350	AT1G78900	AT1G72690					AT1G33730	AT1G47128			AT1G20510
AT1G75760	AT1G80670	AT2G17780	AT2G27830	AT1G78600	AT2G19830	AT1G79040	AT1G72840					AT1G33770	AT1G47330			AT1G20880
AT1G76185	AT2G01020	AT2G18010	AT2G28760	AT1G78830	AT2G20330	AT1G79530	AT1G73720					AT1G33780	AT1G47480			AT1G21050
AT1G76520	AT2G01420	AT2G18020	AT2G28960	AT1G78850	AT2G20360	AT1G79610	AT1G73750					AT1G34020	AT1G47710			AT1G21310
AT1G76600	AT2G02480	AT2G18040	AT2G29490	AT1G79010	AT2G20650	AT1G80110	AT1G73820					AT1G34044	AT1G47960			AT1G21326
AT1G76660	AT2G02760	AT2G18300	AT2G30105	AT1G79040	AT2G22690	AT1G80310	AT1G73875					AT1G34060	AT1G48120			AT1G21440
AT1G76730	AT2G03310	AT2G18770	AT2G30740	AT1G79610	AT2G22830	AT1G80400	AT1G73920					AT1G34270	AT1G48280			AT1G21480
AT1G76930	AT2G03440	AT2G20260	AT2G30920	AT1G79990	AT2G23140	AT1G80440	AT1G74240					AT1G34760	AT1G48360			AT1G21500
AT1G76955	AT2G03890	AT2G20360	AT2G31130	AT1G80110	AT2G23780	AT1G80600	AT1G74930					AT1G35350	AT1G48380			AT1G21590
AT1G77920	AT2G05630	AT2G20850	AT2G31751	AT1G80400	AT2G23840	AT1G80720	AT1G75440					AT1G35612	AT1G48790			AT1G21700
AT1G78300	AT2G06050	AT2G20990	AT2G32020	AT1G80440	AT2G24650	AT1G80830	AT1G75490					AT1G35670	AT1G48970			AT1G21760
AT1G78380	AT2G07671	AT2G21020	AT2G32150	AT1G80600	AT2G24830	AT1G80840	AT1G76070					AT1G35720	AT1G49130			AT1G21830
AT1G78660	AT2G14170	AT2G21050	AT2G32487	AT1G80650	AT2G25200	AT1G80860	AT1G76260					AT1G36622	AT1G49180			AT1G21840
AT1G79450	AT2G16740	AT2G21160	AT2G32980	AT1G80720	AT2G25737	AT1G80900	AT1G77450					AT1G43910	AT1G49730			AT1G21910
AT1G79530	AT2G18650	AT2G21530	AT2G33390	AT1G80830	AT2G26030	AT1G80950	AT1G77480					AT1G44170	AT1G49970			AT1G21920
AT1G79610	AT2G19350	AT2G22570	AT2G33610	AT1G80850	AT2G26260	AT2G01420	AT1G78270					AT1G45000	AT1G50520			AT1G22370
AT1G79940	AT2G20370	AT2G23093	AT2G33620	AT1G80860	AT2G26990	AT2G01460	AT1G78570					AT1G45332	AT1G51140			AT1G22410
AT1G79990	AT2G21130	AT2G23940	AT2G33835	AT1G80900	AT2G27050	AT2G01490	AT1G78890					AT1G47290	AT1G51170			AT1G22640
AT1G80110	AT2G21190	AT2G24165	AT2G34810	AT1G80950	AT2G27460	AT2G02450	AT1G79590					AT1G47310	AT1G51540			AT1G22790
AT1G80400	AT2G21500	AT2G24550	AT2G36060	AT2G01420	AT2G27830	AT2G02540	AT1G79870					AT1G47550	AT1G51550			AT1G23000
AT1G80440	AT2G23780	AT2G24755	AT2G36080	AT2G02450	AT2G28960	AT2G02710	AT1G80310					AT1G47710	AT1G51670			AT1G23052
AT1G80720	AT2G23840	AT2G25180	AT2G36320	AT2G02540	AT2G29410	AT2G03440	AT1G80320					AT1G47860	AT1G51740			AT1G23060
AT1G80840	AT2G24650	AT2G25280	AT2G36910	AT2G02590	AT2G29670	AT2G03980	AT1G80400					AT1G48140	AT1G51913			AT1G23080
AT2G01140	AT2G25900	AT2G25440	AT2G37120	AT2G03220	AT2G30110	AT2G04550	AT1G80450					AT1G48160	AT1G52260			AT1G23170
AT2G01420	AT2G26310	AT2G25450	AT2G37460	AT2G03620	AT2G30580	AT2G05160	AT1G80670					AT1G48380	AT1G52315			AT1G23190
AT2G01460	AT2G26710	AT2G25737	AT2G38010	AT2G04530	AT2G30710	AT2G05210	AT1G80900					AT1G48570	AT1G52720			AT1G23260
AT2G02540	AT2G26990	AT2G25900	AT2G38340	AT2G04550	AT2G30920	AT2G06520	AT2G01020					AT1G49170	AT1G52890			AT1G23390
AT2G03220	AT2G27030	AT2G26710	AT2G38630	AT2G04650	AT2G31090	AT2G06530	AT2G01410					AT1G49350	AT1G53100			AT1G23710
AT2G03620	AT2G27285	AT2G27050	AT2G38710	AT2G05210	AT2G31130	AT2G07727	AT2G01440					AT1G49500	AT1G53170			AT1G23780
AT2G03980	AT2G27510	AT2G27330	AT2G38820	AT2G05630	AT2G31510	AT2G07811	AT2G01600					AT1G49730	AT1G53400			AT1G23850
AT2G05260	AT2G28760	AT2G27720	AT2G38840	AT2G14080	AT2G31751	AT2G14620	AT2G02350					AT1G50010	AT1G53560			AT1G23870
AT2G05630	AT2G30105	AT2G27830	AT2G38970	AT2G14620	AT2G32080	AT2G15760	AT2G02480					AT1G50120	AT1G53580			AT1G24090
AT2G05710	AT2G30920	AT2G28370	AT2G39000	AT2G14835	AT2G32400	AT2G17780	AT2G02510					AT1G50940	AT1G53625			AT1G24140
AT2G05765	AT2G30990	AT2G28400	AT2G39110	AT2G16090	AT2G32580	AT2G17880	AT2G03310					AT1G51170	AT1G53920			AT1G24575
AT2G06530	AT2G31130	AT2G28500	AT2G39700	AT2G17450	AT2G32660	AT2G18010	AT2G03440					AT1G51390	AT1G54210			AT1G24625
AT2G07727	AT2G31751	AT2G29670	AT2G39725	AT2G17560	AT2G32910	AT2G18030	AT2G03690					AT1G51400	AT1G54390			AT1G25230
AT2G07811	AT2G32150	AT2G29680	AT2G39750	AT2G17780	AT2G32980	AT2G18040	AT2G04050					AT1G51550	AT1G54410			AT1G25540
AT2G14610	AT2G32530	AT2G29690	AT2G39830	AT2G17880	AT2G33050	AT2G18290	AT2G05160					AT1G51620	AT1G54580			AT1G25550
AT2G14835	AT2G32660	AT2G30010	AT2G40180	AT2G18010	AT2G33610	AT2G18300	AT2G07671					AT1G51660	AT1G54630			AT1G26300
AT2G15760	AT2G32910	AT2G30190	AT2G40390	AT2G18020	AT2G33620	AT2G18650	AT2G14290					AT1G51760	AT1G54680			AT1G26390
AT2G17040	AT2G32970	AT2G30410	AT2G40830	AT2G18040	AT2G33710	AT2G18700	AT2G16660					AT1G51820	AT1G54710			AT1G26460
AT2G17560	AT2G33050	AT2G30600	AT2G40840	AT2G18280	AT2G35110	AT2G19600	AT2G17450					AT1G51860	AT1G55000			AT1G26558
AT2G17740	AT2G33390	AT2G30920	AT2G40880	AT2G18290	AT2G35240	AT2G20360	AT2G17700					AT1G51913	AT1G55230			AT1G26750
AT2G17780	AT2G34010	AT2G32010	AT2G41160	AT2G19250	AT2G35738	AT2G20990	AT2G17880					AT1G52220	AT1G55265			AT1G26800
AT2G18010	AT2G34580	AT2G32020	AT2G42280	AT2G19740	AT2G36305	AT2G21020	AT2G18010					AT1G52260	AT1G55325			AT1G26840
AT2G18040	AT2G34810	AT2G32170	AT2G42780	AT2G19810	AT2G36320	AT2G22475	AT2G18250					AT1G52270	AT1G55365			AT1G26900
AT2G18300	AT2G35240	AT2G32190	AT2G43120	AT2G20060	AT2G36910	AT2G22780	AT2G18650					AT1G52347	AT1G55760			AT1G27130
AT2G18650	AT2G35635	AT2G32487	AT2G43330	AT2G20260	AT2G37035	AT2G22840	AT2G19120					AT1G52720	AT1G55880			AT1G27150
AT2G18750	AT2G35738	AT2G32550	AT2G43400	AT2G20360	AT2G37120	AT2G22880	AT2G20360					AT1G52910	AT1G56090			AT1G27210
AT2G18770	AT2G36060	AT2G32970	AT2G43520	AT2G20390	AT2G37460	AT2G23093	AT2G22690					AT1G53170	AT1G56150			AT1G27290
AT2G19250	AT2G36305	AT2G33020	AT2G43680	AT2G20990	AT2G38010	AT2G24550	AT2G22830					AT1G53180	AT1G56250			AT1G27300
AT2G19600	AT2G38010	AT2G33370	AT2G43760	AT2G21050	AT2G38170	AT2G24755	AT2G22910					AT1G53400	AT1G56423			AT1G27320
AT2G20360	AT2G38630	AT2G34150	AT2G44130	AT2G21188	AT2G38180	AT2G25440	AT2G23370					AT1G53580	AT1G56650			AT1G27385
AT2G20990	AT2G38740	AT2G34430	AT2G44370	AT2G21530	AT2G38740	AT2G25737	AT2G23780					AT1G53590	AT1G57590			AT1G27435
AT2G21050	AT2G38790	AT2G34480	AT2G44380	AT2G22475	AT2G38820	AT2G26030	AT2G24650					AT1G53830	AT1G58110			AT1G27730
AT2G21188	AT2G38820	AT2G35635	AT2G44740	AT2G22780	AT2G38840	AT2G26530	AT2G25200					AT1G53887	AT1G58420			AT1G27770
AT2G22370	AT2G39110	AT2G36080	AT2G44790	AT2G23770	AT2G38970	AT2G26710	AT2G26030					AT1G54000	AT1G60070			AT1G27840
AT2G22475	AT2G39360	AT2G36310	AT2G44850	AT2G23820	AT2G39110	AT2G27050	AT2G27050					AT1G54090	AT1G60970			AT1G27930
AT2G22780	AT2G39700	AT2G36370	AT2G46030	AT2G23890	AT2G39630	AT2G27330	AT2G27460					AT1G54130	AT1G61000			AT1G27970
AT2G22880	AT2G39750	AT2G36530	AT2G46490	AT2G24165	AT2G39700	AT2G27720	AT2G27510					AT1G54250	AT1G61030			AT1G28150
AT2G23090	AT2G39830	AT2G36780	AT2G46540	AT2G24300	AT2G39725	AT2G27830	AT2G27830					AT1G54410	AT1G61120			AT1G28200
AT2G24165	AT2G40180	AT2G36792	AT2G47600	AT2G24550	AT2G39750	AT2G28370	AT2G28710					AT1G54440	AT1G61160			AT1G28230
AT2G24300	AT2G40390	AT2G37460	AT2G47700	AT2G24755	AT2G40340	AT2G28400	AT2G28760					AT1G54580	AT1G61255			AT1G28370
AT2G24755	AT2G40435	AT2G37660	AT2G47730	AT2G25450	AT2G40435	AT2G29470	AT2G29490					AT1G55080	AT1G61610			AT1G28540
AT2G25000	AT2G40730	AT2G37790	AT2G48030	AT2G25737	AT2G40610	AT2G29670	AT2G30710					AT1G55130	AT1G61780			AT1G28570
AT2G25180	AT2G40740	AT2G38170	AT3G01350	AT2G26260	AT2G40860	AT2G29680	AT2G30920					AT1G55760	AT1G62040			AT1G29060
AT2G25280	AT2G40830	AT2G38530	AT3G01450	AT2G26710	AT2G41150	AT2G29690	AT2G31130					AT1G55790	AT1G62330			AT1G29150
AT2G25440	AT2G40840	AT2G38580	AT3G02170	AT2G27050	AT2G42280	AT2G30110	AT2G31510					AT1G56010	AT1G62370			AT1G29260
AT2G25450	AT2G40860	AT2G38820	AT3G02370	AT2G27330	AT2G42640	AT2G30410	AT2G31751					AT1G56230	AT1G62430			AT1G29290
AT2G25900	AT2G40880	AT2G39410	AT3G02700	AT2G27460	AT2G43120	AT2G30570	AT2G32020					AT1G57590	AT1G62570			AT1G29390
AT2G26010	AT2G41150	AT2G39460	AT3G03180	AT2G27770	AT2G43400	AT2G30600	AT2G32580					AT1G58200	AT1G62820			AT1G29460
AT2G26020	AT2G41450	AT2G39650	AT3G03340	AT2G28370	AT2G43520	AT2G30720	AT2G32660					AT1G58225	AT1G62880			AT1G29465
AT2G26710	AT2G42670	AT2G39705	AT3G03830	AT2G28500	AT2G43580	AT2G30920	AT2G32910					AT1G58300	AT1G63000			AT1G29490
AT2G27310	AT2G42760	AT2G39750	AT3G03850	AT2G29110	AT2G43680	AT2G31580	AT2G32980					AT1G58420	AT1G63090			AT1G29550
AT2G27330	AT2G42780	AT2G39900	AT3G04300	AT2G29670	AT2G43760	AT2G32010	AT2G33610					AT1G59560	AT1G63220			AT1G29690
AT2G27660	AT2G43050	AT2G39980	AT3G05170	AT2G29680	AT2G44130	AT2G32020	AT2G33620					AT1G59600	AT1G63750			AT1G29715
AT2G27720	AT2G43180	AT2G40000	AT3G05280	AT2G30050	AT2G44850	AT2G32170	AT2G35240					AT1G59620	AT1G63800			AT1G29750
AT2G28160	AT2G43330	AT2G40640	AT3G05510	AT2G30110	AT2G45810	AT2G32200	AT2G35630					AT1G59990	AT1G64190			AT1G29850
AT2G28370	AT2G43400	AT2G40970	AT3G05760	AT2G30410	AT2G46490	AT2G32550	AT2G35738					AT1G60140	AT1G64200			AT1G29910
AT2G28400	AT2G43520	AT2G41510	AT3G06370	AT2G30600	AT2G46505	AT2G34420	AT2G36060					AT1G60730	AT1G64563			AT1G29920
AT2G28500	AT2G43620	AT2G42310	AT3G06470	AT2G30920	AT2G46540	AT2G34480	AT2G36305					AT1G60780	AT1G64572			AT1G29990
AT2G28755	AT2G43680	AT2G42320	AT3G07280	AT2G31200	AT2G46700	AT2G35320	AT2G36320					AT1G60940	AT1G64750			AT1G30040
AT2G29110	AT2G43760	AT2G42480	AT3G07350	AT2G31580	AT2G47600	AT2G35635	AT2G36810					AT1G61240	AT1G65000			AT1G30100
AT2G29120	AT2G44383	AT2G42490	AT3G07800	AT2G32010	AT2G47700	AT2G35780	AT2G37035					AT1G61260	AT1G65410			AT1G30200
AT2G29470	AT2G44740	AT2G42590	AT3G07930	AT2G32020	AT2G47960	AT2G36080	AT2G37550					AT1G61520	AT1G65483			AT1G30300
AT2G29680	AT2G44790	AT2G42600	AT3G07940	AT2G32170	AT3G01090	AT2G36310	AT2G38010					AT1G62430	AT1G65500			AT1G30510
AT2G30050	AT2G44850	AT2G42610	AT3G08860	AT2G32550	AT3G01150	AT2G36380	AT2G38740					AT1G62810	AT1G65730			AT1G30630
AT2G30060	AT2G45260	AT2G42640	AT3G08890	AT2G32650	AT3G01360	AT2G36530	AT2G38840					AT1G62820	AT1G65845			AT1G30720
AT2G30110	AT2G46490	AT2G42680	AT3G10020	AT2G32850	AT3G01450	AT2G36770	AT2G39000					AT1G63220	AT1G65850			AT1G30820
AT2G30190	AT2G46505	AT2G42960	AT3G10310	AT2G32970	AT3G01460	AT2G36780	AT2G39110					AT1G63690	AT1G65960			AT1G30850
AT2G30720	AT2G46540	AT2G43760	AT3G10480	AT2G33020	AT3G01910	AT2G36792	AT2G39700					AT1G63720	AT1G66173			AT1G30890
AT2G30920	AT3G01150	AT2G43870	AT3G10490	AT2G33490	AT3G02170	AT2G37460	AT2G39725					AT1G63860	AT1G66480			AT1G31010
AT2G31200	AT3G01350	AT2G44210	AT3G10660	AT2G33580	AT3G02370	AT2G37470	AT2G39750					AT1G63900	AT1G67300			AT1G31280
AT2G31300	AT3G01910	AT2G44383	AT3G10730	AT2G34010	AT3G02700	AT2G38170	AT2G40190					AT1G64460	AT1G67325			AT1G31330
AT2G32020	AT3G02700	AT2G44520	AT3G11280	AT2G34150	AT3G02780	AT2G38260	AT2G40390					AT1G64470	AT1G67420			AT1G31340
AT2G32100	AT3G03340	AT2G44740	AT3G11590	AT2G34430	AT3G02800	AT2G38530	AT2G40435					AT1G65250	AT1G67820			AT1G31570
AT2G32170	AT3G03773	AT2G45600	AT3G11650	AT2G34480	AT3G03340	AT2G38580	AT2G40810					AT1G65390	AT1G67900			AT1G31730
AT2G32190	AT3G03890	AT2G45810	AT3G11780	AT2G34650	AT3G03773	AT2G38710	AT2G40830					AT1G65500	AT1G67950			AT1G31820
AT2G32200	AT3G04300	AT2G46650	AT3G11890	AT2G35070	AT3G03990	AT2G38820	AT2G40860					AT1G65610	AT1G68190			AT1G31880
AT2G32560	AT3G04605	AT2G47600	AT3G11930	AT2G35240	AT3G04600	AT2G38870	AT2G40880					AT1G65690	AT1G68200			AT1G32170
AT2G32580	AT3G05120	AT3G01175	AT3G12200	AT2G35780	AT3G04740	AT2G39380	AT2G41150					AT1G65960	AT1G68310			AT1G32270
AT2G32970	AT3G05500	AT3G01390	AT3G12300	AT2G36080	AT3G05170	AT2G39410	AT2G41450					AT1G65970	AT1G68330			AT1G32928
AT2G33370	AT3G05510	AT3G01690	AT3G12380	AT2G36780	AT3G05510	AT2G39518	AT2G41830					AT1G66090	AT1G68390			AT1G32960
AT2G33580	AT3G06070	AT3G02080	AT3G12600	AT2G36792	AT3G05545	AT2G39650	AT2G42280					AT1G66160	AT1G68840			AT1G33055
AT2G34480	AT3G06080	AT3G02150	AT3G12680	AT2G37160	AT3G05680	AT2G39750	AT2G42670					AT1G66173	AT1G68920			AT1G33120
AT2G34620	AT3G07350	AT3G02710	AT3G13030	AT2G37680	AT3G06070	AT2G39900	AT2G42760					AT1G66580	AT1G69030			AT1G33250
AT2G34650	AT3G07790	AT3G03100	AT3G13560	AT2G37790	AT3G06080	AT2G39910	AT2G42780					AT1G66900	AT1G69370			AT1G33265
AT2G35070	AT3G07930	AT3G03590	AT3G13850	AT2G38170	AT3G06420	AT2G39980	AT2G43060					AT1G66920	AT1G69390			AT1G33400
AT2G35635	AT3G07940	AT3G03640	AT3G14067	AT2G38260	AT3G06470	AT2G40190	AT2G43120					AT1G66960	AT1G69485			AT1G33420
AT2G35780	AT3G08890	AT3G03820	AT3G15290	AT2G38530	AT3G06780	AT2G40640	AT2G43330					AT1G67000	AT1G69510			AT1G33475
AT2G35930	AT3G09900	AT3G03860	AT3G15358	AT2G38580	AT3G07100	AT2G40860	AT2G43400					AT1G67050	AT1G69740			AT1G33490
AT2G36080	AT3G10030	AT3G03990	AT3G15450	AT2G38790	AT3G07350	AT2G40970	AT2G43620					AT1G67140	AT1G69780			AT1G33560
AT2G36310	AT3G10130	AT3G04060	AT3G15540	AT2G38820	AT3G07480	AT2G41380	AT2G43680					AT1G67190	AT1G69790			AT1G33590
AT2G36370	AT3G10260	AT3G04070	AT3G15640	AT2G39410	AT3G07800	AT2G42210	AT2G43760					AT1G67350	AT1G69850			AT1G33600
AT2G36380	AT3G10390	AT3G04090	AT3G17820	AT2G39460	AT3G07930	AT2G42230	AT2G44210					AT1G67500	AT1G70150			AT1G33610
AT2G36770	AT3G10480	AT3G05100	AT3G17900	AT2G39650	AT3G07940	AT2G42310	AT2G44740					AT1G67900	AT1G70290			AT1G33612
AT2G36780	AT3G10490	AT3G05420	AT3G18035	AT2G39750	AT3G08590	AT2G42490	AT2G44850					AT1G67920	AT1G70330			AT1G33730
AT2G36800	AT3G10730	AT3G06070	AT3G18140	AT2G39900	AT3G08860	AT2G42590	AT2G45170					AT1G67940	AT1G70490			AT1G33770
AT2G36900	AT3G11590	AT3G06370	AT3G18215	AT2G39910	AT3G09390	AT2G42600	AT2G45810					AT1G67960	AT1G70581			AT1G33780
AT2G37130	AT3G11650	AT3G06590	AT3G18410	AT2G39920	AT3G10310	AT2G42610	AT2G46030					AT1G67980	AT1G70740			AT1G34020
AT2G37460	AT3G11780	AT3G07110	AT3G21060	AT2G40000	AT3G10390	AT2G42640	AT2G46490					AT1G68190	AT1G70750			AT1G34044
AT2G37470	AT3G11890	AT3G07350	AT3G21350	AT2G40190	AT3G10550	AT2G42700	AT2G46505					AT1G68330	AT1G70820			AT1G34060
AT2G37620	AT3G12200	AT3G07525	AT3G21351	AT2G40970	AT3G11100	AT2G42960	AT2G46540					AT1G68620	AT1G70940			AT1G34270
AT2G37680	AT3G12300	AT3G07640	AT3G21420	AT2G41510	AT3G11280	AT2G42980	AT2G47600					AT1G68680	AT1G71030			AT1G34630
AT2G38170	AT3G12650	AT3G07940	AT3G21781	AT2G42210	AT3G11590	AT2G43400	AT2G47700					AT1G68765	AT1G71410			AT1G34760
AT2G38260	AT3G13550	AT3G08510	AT3G22425	AT2G42480	AT3G11650	AT2G43760	AT2G47960					AT1G68820	AT1G71440			AT1G35320
AT2G38530	AT3G14750	AT3G09860	AT3G22930	AT2G42490	AT3G11890	AT2G43870	AT2G47970					AT1G68840	AT1G71530			AT1G35350
AT2G38580	AT3G15020	AT3G09900	AT3G23030	AT2G42590	AT3G11960	AT2G44210	AT3G01350					AT1G69030	AT1G71865			AT1G35612
AT2G38710	AT3G15290	AT3G10815	AT3G23080	AT2G42600	AT3G12200	AT2G44350	AT3G01450					AT1G69360	AT1G71880			AT1G35670
AT2G38790	AT3G15358	AT3G10930	AT3G23480	AT2G42640	AT3G12300	AT2G44500	AT3G01910					AT1G69370	AT1G71890			AT1G35720
AT2G38820	AT3G15610	AT3G11240	AT3G23635	AT2G42680	AT3G12680	AT2G44520	AT3G02370					AT1G69410	AT1G71940			AT1G36620
AT2G38870	AT3G17250	AT3G11340	AT3G25990	AT2G42960	AT3G13290	AT2G44740	AT3G02700					AT1G69490	AT1G71970			AT1G36622
AT2G39380	AT3G17820	AT3G11510	AT3G26510	AT2G43570	AT3G13410	AT2G45600	AT3G03140					AT1G69510	AT1G72010			AT1G36940
AT2G39410	AT3G17900	AT3G11570	AT3G26890	AT2G43640	AT3G14067	AT2G45810	AT3G03180					AT1G69530	AT1G72220			AT1G43160
AT2G39460	AT3G18140	AT3G11590	AT3G27310	AT2G43760	AT3G14750	AT2G46540	AT3G03340					AT1G69620	AT1G72450			AT1G43690
AT2G39518	AT3G18770	AT3G12680	AT3G27500	AT2G43820	AT3G15450	AT2G46650	AT3G03773					AT1G69780	AT1G72660			AT1G43910
AT2G39650	AT3G19390	AT3G13560	AT3G27930	AT2G43870	AT3G15540	AT2G47190	AT3G03790					AT1G69830	AT1G72690			AT1G44170
AT2G39750	AT3G19520	AT3G13610	AT3G28180	AT2G44060	AT3G15640	AT2G47600	AT3G03850					AT1G69900	AT1G72710			AT1G44350
AT2G40190	AT3G20290	AT3G13672	AT3G28720	AT2G44380	AT3G15660	AT3G01090	AT3G04300					AT1G69910	AT1G72820			AT1G45000
AT2G40205	AT3G21060	AT3G13677	AT3G29035	AT2G44383	AT3G17250	AT3G01360	AT3G04605					AT1G69930	AT1G72840			AT1G45233
AT2G40270	AT3G21351	AT3G13720	AT3G29330	AT2G44610	AT3G17820	AT3G01390	AT3G04740					AT1G69980	AT1G72855			AT1G45332
AT2G40640	AT3G21360	AT3G14220	AT3G29670	AT2G44740	AT3G17850	AT3G01690	AT3G05040					AT1G70290	AT1G72870			AT1G47128
AT2G41110	AT3G21420	AT3G14610	AT3G30620	AT2G45240	AT3G17900	AT3G02080	AT3G05170					AT1G70300	AT1G72950			AT1G47290
AT2G41380	AT3G21430	AT3G14930	AT3G30775	AT2G45600	AT3G18035	AT3G02460	AT3G05280					AT1G70350	AT1G73720			AT1G47310
AT2G41410	AT3G22110	AT3G15110	AT3G44280	AT2G45810	AT3G18140	AT3G02550	AT3G05510					AT1G70490	AT1G73750			AT1G47330
AT2G41510	AT3G22425	AT3G15540	AT3G45390	AT2G46180	AT3G18215	AT3G02650	AT3G05545					AT1G70740	AT1G73820			AT1G47480
AT2G41705	AT3G22430	AT3G15610	AT3G46660	AT2G46550	AT3G18990	AT3G02800	AT3G05680					AT1G70800	AT1G73830			AT1G47550
AT2G42320	AT3G22930	AT3G15660	AT3G47300	AT2G47210	AT3G20280	AT3G02820	AT3G06070					AT1G70940	AT1G73875			AT1G47710
AT2G42360	AT3G23030	AT3G17430	AT3G47560	AT2G47600	AT3G20670	AT3G03100	AT3G06400					AT1G71260	AT1G73920			AT1G47860
AT2G42480	AT3G23080	AT3G17860	AT3G47620	AT2G47730	AT3G21060	AT3G03180	AT3G06420					AT1G71310	AT1G74240			AT1G47960
AT2G42490	AT3G23480	AT3G18030	AT3G47850	AT3G01090	AT3G21350	AT3G03590	AT3G06470					AT1G71410	AT1G74930			AT1G48120
AT2G42590	AT3G23635	AT3G18050	AT3G47930	AT3G01170	AT3G21360	AT3G03850	AT3G06780					AT1G71440	AT1G75370			AT1G48140
AT2G42610	AT3G24982	AT3G18140	AT3G47990	AT3G01390	AT3G21420	AT3G03860	AT3G07100					AT1G71865	AT1G75420			AT1G48160
AT2G42640	AT3G25180	AT3G18170	AT3G48590	AT3G01690	AT3G21430	AT3G04060	AT3G07280					AT1G71890	AT1G75440			AT1G48280
AT2G42960	AT3G25760	AT3G18740	AT3G48880	AT3G01930	AT3G22110	AT3G04070	AT3G07350					AT1G71950	AT1G75490			AT1G48360
AT2G43070	AT3G25770	AT3G19030	AT3G49130	AT3G02080	AT3G22400	AT3G04717	AT3G07640					AT1G71970	AT1G75500			AT1G48380
AT2G43150	AT3G25910	AT3G19580	AT3G49160	AT3G02090	AT3G22425	AT3G04890	AT3G07790					AT1G72160	AT1G76070			AT1G48570
AT2G43400	AT3G25990	AT3G19640	AT3G49340	AT3G02650	AT3G22430	AT3G05040	AT3G07930					AT1G72175	AT1G76260			AT1G48790
AT2G43570	AT3G26510	AT3G20290	AT3G49570	AT3G02710	AT3G22930	AT3G05420	AT3G08860					AT1G72630	AT1G76320			AT1G48970
AT2G43620	AT3G26890	AT3G20390	AT3G50010	AT3G02800	AT3G23030	AT3G06320	AT3G08890					AT1G72830	AT1G76900			AT1G49130
AT2G43870	AT3G27260	AT3G22230	AT3G50040	AT3G02820	AT3G23080	AT3G06483	AT3G09320					AT1G72910	AT1G77450			AT1G49170
AT2G44060	AT3G27310	AT3G22910	AT3G50270	AT3G03100	AT3G23635	AT3G06500	AT3G09900					AT1G72920	AT1G77480			AT1G49180
AT2G44210	AT3G28700	AT3G22942	AT3G50760	AT3G03590	AT3G24200	AT3G06590	AT3G10130					AT1G72940	AT1G78270			AT1G49350
AT2G44350	AT3G28720	AT3G23080	AT3G50850	AT3G03640	AT3G26510	AT3G07350	AT3G10310					AT1G73210	AT1G78570			AT1G49500
AT2G44380	AT3G29100	AT3G23170	AT3G51040	AT3G03720	AT3G26890	AT3G07790	AT3G10390					AT1G73750	AT1G78670			AT1G49730
AT2G44383	AT3G29670	AT3G23690	AT3G51110	AT3G03990	AT3G27325	AT3G08510	AT3G10440					AT1G73790	AT1G78890			AT1G49970
AT2G44500	AT3G44550	AT3G24830	AT3G52060	AT3G04060	AT3G27500	AT3G08885	AT3G10550					AT1G73830	AT1G78900			AT1G50010
AT2G44520	AT3G44970	AT3G25600	AT3G52070	AT3G05100	AT3G27930	AT3G08890	AT3G10730					AT1G73920	AT1G78910			AT1G50120
AT2G44610	AT3G45190	AT3G25760	AT3G52570	AT3G05280	AT3G28100	AT3G08940	AT3G11100					AT1G74370	AT1G79440			AT1G50520
AT2G44740	AT3G45660	AT3G25780	AT3G52860	AT3G05420	AT3G28180	AT3G09580	AT3G11280					AT1G74650	AT1G79590			AT1G50940
AT2G45600	AT3G46660	AT3G26510	AT3G53600	AT3G05710	AT3G28700	AT3G09860	AT3G11590					AT1G74910	AT1G79870			AT1G51140
AT2G46150	AT3G47560	AT3G26690	AT3G53960	AT3G05910	AT3G29100	AT3G09900	AT3G11650					AT1G74930	AT1G80110			AT1G51170
AT2G46170	AT3G47620	AT3G27230	AT3G54950	AT3G06590	AT3G29330	AT3G10320	AT3G11780					AT1G74940	AT1G80310			AT1G51390
AT2G46180	AT3G47850	AT3G27280	AT3G55240	AT3G07060	AT3G29670	AT3G10370	AT3G11960					AT1G75220	AT1G80320			AT1G51400
AT2G46400	AT3G48210	AT3G27310	AT3G55440	AT3G07350	AT3G30775	AT3G10815	AT3G12200					AT1G75440	AT1G80400			AT1G51540
AT2G46600	AT3G48590	AT3G27500	AT3G55560	AT3G07640	AT3G42050	AT3G10920	AT3G12300					AT1G75460	AT1G80450			AT1G51550
AT2G47190	AT3G48880	AT3G27970	AT3G55600	AT3G07790	AT3G42883	AT3G10930	AT3G12380					AT1G75500	AT1G80650			AT1G51620
AT2G47390	AT3G49340	AT3G28050	AT3G56580	AT3G08550	AT3G43230	AT3G11570	AT3G12680					AT1G75760	AT1G80670			AT1G51660
AT3G01175	AT3G49570	AT3G28100	AT3G57100	AT3G08885	AT3G44600	AT3G11590	AT3G13410					AT1G76100	AT1G80900			AT1G51670
AT3G01390	AT3G49880	AT3G28857	AT3G57580	AT3G08890	AT3G45190	AT3G11780	AT3G13772					AT1G76185	AT2G01020			AT1G51740
AT3G01830	AT3G50010	AT3G29360	AT3G57870	AT3G08940	AT3G45660	AT3G12145	AT3G14067					AT1G76520	AT2G01100			AT1G51760
AT3G01930	AT3G50040	AT3G33225	AT3G58170	AT3G09200	AT3G47540	AT3G13200	AT3G14750					AT1G76600	AT2G01140			AT1G51820
AT3G02080	AT3G50070	AT3G43850	AT3G58670	AT3G09580	AT3G47850	AT3G13672	AT3G15358					AT1G76640	AT2G01410			AT1G51860
AT3G02090	AT3G50270	AT3G44200	AT3G59010	AT3G09860	AT3G47930	AT3G13677	AT3G15540					AT1G76660	AT2G01420			AT1G51913
AT3G02150	AT3G50760	AT3G44260	AT3G59080	AT3G10815	AT3G47990	AT3G14370	AT3G15640					AT1G76680	AT2G01440			AT1G52220
AT3G02190	AT3G50850	AT3G44620	AT3G59150	AT3G10930	AT3G48590	AT3G14410	AT3G15660					AT1G76730	AT2G01600			AT1G52260
AT3G02360	AT3G51040	AT3G45140	AT3G59750	AT3G11280	AT3G48600	AT3G14930	AT3G16630					AT1G76790	AT2G02050			AT1G52270
AT3G02460	AT3G52070	AT3G45960	AT3G59940	AT3G11510	AT3G48880	AT3G15290	AT3G17250					AT1G76930	AT2G02180			AT1G52315
AT3G02630	AT3G52570	AT3G46320	AT3G60160	AT3G11570	AT3G49160	AT3G15450	AT3G17590					AT1G76955	AT2G02350			AT1G52347
AT3G02710	AT3G52730	AT3G46590	AT3G60170	AT3G12030	AT3G49340	AT3G15500	AT3G17820					AT1G77000	AT2G02480			AT1G52720
AT3G02840	AT3G52860	AT3G46600	AT3G60340	AT3G13060	AT3G49400	AT3G15540	AT3G17850					AT1G77350	AT2G02510			AT1G52890
AT3G03020	AT3G53570	AT3G46880	AT3G60410	AT3G13062	AT3G49590	AT3G15610	AT3G18035					AT1G77460	AT2G02760			AT1G52910
AT3G03180	AT3G53960	AT3G47350	AT3G61060	AT3G13610	AT3G49880	AT3G15640	AT3G18140					AT1G77750	AT2G03310			AT1G53100
AT3G03305	AT3G54826	AT3G47540	AT3G61270	AT3G13677	AT3G50060	AT3G16460	AT3G18215					AT1G77765	AT2G03440			AT1G53170
AT3G03310	AT3G54950	AT3G48820	AT3G62070	AT3G13720	AT3G50070	AT3G17850	AT3G20060					AT1G77920	AT2G03590			AT1G53180
AT3G03820	AT3G55140	AT3G49010	AT3G62220	AT3G14120	AT3G50270	AT3G17910	AT3G20280					AT1G78300	AT2G03690			AT1G53400
AT3G04060	AT3G55240	AT3G49160	AT3G62455	AT3G14370	AT3G50520	AT3G18050	AT3G20670					AT1G78370	AT2G03890			AT1G53580
AT3G04070	AT3G55440	AT3G49310	AT3G62770	AT3G14910	AT3G50800	AT3G18140	AT3G21060					AT1G78380	AT2G04050			AT1G53590
AT3G04090	AT3G55560	AT3G49550	AT3G63000	AT3G14930	AT3G50850	AT3G18170	AT3G21350					AT1G78600	AT2G04550			AT1G53625
AT3G04120	AT3G55740	AT3G49940	AT3G63210	AT3G15450	AT3G51010	AT3G18350	AT3G21351					AT1G78660	AT2G05160			AT1G53830
AT3G05100	AT3G55970	AT3G50110	AT3G63290	AT3G15500	AT3G51040	AT3G18760	AT3G21360					AT1G78830	AT2G05630			AT1G53887
AT3G05420	AT3G56500	AT3G50280	AT3G63440	AT3G15536	AT3G51110	AT3G18770	AT3G21420					AT1G78850	AT2G06050			AT1G53920
AT3G05710	AT3G57580	AT3G50550	AT4G00750	AT3G15540	AT3G51990	AT3G19030	AT3G21430					AT1G78900	AT2G07671			AT1G54000
AT3G05910	AT3G58170	AT3G50800	AT4G01026	AT3G15610	AT3G52030	AT3G19380	AT3G22110					AT1G79010	AT2G13130			AT1G54090
AT3G06370	AT3G58670	AT3G51310	AT4G01330	AT3G15660	AT3G52060	AT3G20290	AT3G22425					AT1G79040	AT2G14170			AT1G54130
AT3G06500	AT3G58710	AT3G51600	AT4G01450	AT3G17850	AT3G52070	AT3G20390	AT3G22430					AT1G79450	AT2G14290			AT1G54210
AT3G06540	AT3G58760	AT3G51830	AT4G01860	AT3G18030	AT3G52072	AT3G20395	AT3G22930					AT1G79530	AT2G16660			AT1G54250
AT3G06590	AT3G59080	AT3G51915	AT4G02330	AT3G18050	AT3G52860	AT3G21610	AT3G23030					AT1G79610	AT2G16740			AT1G54390
AT3G06860	AT3G59930	AT3G52070	AT4G02390	AT3G18140	AT3G53020	AT3G22200	AT3G23080					AT1G79940	AT2G16930			AT1G54410
AT3G07110	AT3G59940	AT3G52190	AT4G02500	AT3G18170	AT3G53210	AT3G22910	AT3G23110					AT1G79990	AT2G17450			AT1G54440
AT3G07600	AT3G60200	AT3G52630	AT4G02540	AT3G18480	AT3G53570	AT3G23250	AT3G23480					AT1G80110	AT2G17500			AT1G54580
AT3G07640	AT3G60340	AT3G53150	AT4G03115	AT3G18580	AT3G53650	AT3G24830	AT3G23635					AT1G80310	AT2G17560			AT1G54630
AT3G07790	AT3G60410	AT3G53370	AT4G03510	AT3G18760	AT3G53960	AT3G25760	AT3G24315					AT1G80400	AT2G17700			AT1G54680
AT3G08510	AT3G61350	AT3G53650	AT4G04409	AT3G19030	AT3G54826	AT3G25770	AT3G25545					AT1G80440	AT2G17880			AT1G54710
AT3G08580	AT3G61880	AT3G53870	AT4G05070	AT3G19580	AT3G54950	AT3G25780	AT3G25760					AT1G80600	AT2G18010			AT1G55000
AT3G08640	AT3G61930	AT3G54030	AT4G07950	AT3G19640	AT3G55240	AT3G26370	AT3G26380					AT1G80650	AT2G18250			AT1G55080
AT3G08885	AT3G62070	AT3G54160	AT4G08330	AT3G20060	AT3G55440	AT3G26470	AT3G26510					AT1G80720	AT2G18650			AT1G55130
AT3G09690	AT3G62455	AT3G54270	AT4G08860	AT3G20290	AT3G55480	AT3G26510	AT3G27460					AT1G80830	AT2G18700			AT1G55230
AT3G09900	AT3G62650	AT3G54880	AT4G08920	AT3G20390	AT3G55560	AT3G27230	AT3G28180					AT1G80840	AT2G18960			AT1G55265
AT3G10320	AT3G63000	AT3G54890	AT4G08950	AT3G20395	AT3G55740	AT3G27310	AT3G28857					AT1G80850	AT2G19120			AT1G55365
AT3G10815	AT3G63210	AT3G55440	AT4G09560	AT3G20420	AT3G56580	AT3G27500	AT3G29100					AT1G80860	AT2G19250			AT1G55760
AT3G10930	AT4G00200	AT3G55560	AT4G09760	AT3G21420	AT3G56640	AT3G27880	AT3G29670					AT1G80900	AT2G19350			AT1G55790
AT3G11280	AT4G00750	AT3G56880	AT4G11150	AT3G22230	AT3G57580	AT3G27970	AT3G42050					AT1G80950	AT2G19830			AT1G55880
AT3G11570	AT4G01026	AT3G57260	AT4G11230	AT3G23030	AT3G57750	AT3G28100	AT3G42800					AT2G01140	AT2G20330			AT1G56010
AT3G11580	AT4G01330	AT3G57650	AT4G11360	AT3G23080	AT3G57760	AT3G28370	AT3G42883					AT2G01420	AT2G20360			AT1G56090
AT3G11590	AT4G01350	AT3G57760	AT4G14270	AT3G23690	AT3G57790	AT3G28857	AT3G43230					AT2G01460	AT2G20370			AT1G56150
AT3G11800	AT4G01450	AT3G57790	AT4G14570	AT3G24350	AT3G57870	AT3G28910	AT3G44970					AT2G01490	AT2G20650			AT1G56230
AT3G13080	AT4G02330	AT3G57870	AT4G14905	AT3G24830	AT3G58170	AT3G29035	AT3G45660					AT2G01930	AT2G21130			AT1G56423
AT3G13200	AT4G02390	AT3G57890	AT4G14990	AT3G25040	AT3G58380	AT3G29130	AT3G46590					AT2G02450	AT2G21190			AT1G56650
AT3G13437	AT4G02500	AT3G58120	AT4G15165	AT3G25510	AT3G58670	AT3G29320	AT3G46660					AT2G02540	AT2G21500			AT1G57590
AT3G13672	AT4G02540	AT3G59540	AT4G15210	AT3G25717	AT3G59930	AT3G29360	AT3G47610					AT2G02590	AT2G22690			AT1G58110
AT3G13677	AT4G02640	AT3G59900	AT4G15520	AT3G26510	AT3G59940	AT3G30775	AT3G47620					AT2G02710	AT2G22830			AT1G58200
AT3G14280	AT4G02880	AT3G60070	AT4G15990	AT3G26690	AT3G59950	AT3G43250	AT3G47730					AT2G03220	AT2G22910			AT1G58225
AT3G15290	AT4G03115	AT3G60180	AT4G16144	AT3G27280	AT3G60160	AT3G43850	AT3G47850					AT2G03330	AT2G23140			AT1G58300
AT3G15536	AT4G04020	AT3G60370	AT4G16265	AT3G27310	AT3G60200	AT3G44160	AT3G47930					AT2G03440	AT2G23370			AT1G58420
AT3G15540	AT4G04409	AT3G60480	AT4G16700	AT3G27470	AT3G60240	AT3G44200	AT3G47990					AT2G03620	AT2G23780			AT1G59560
AT3G15610	AT4G04790	AT3G61050	AT4G16892	AT3G27500	AT3G60340	AT3G44260	AT3G48590					AT2G03980	AT2G23840			AT1G59600
AT3G15710	AT4G05050	AT3G61060	AT4G16920	AT3G27610	AT3G60410	AT3G44620	AT3G48880					AT2G04530	AT2G24160			AT1G59620
AT3G15730	AT4G08330	AT3G61180	AT4G17080	AT3G27970	AT3G61350	AT3G44860	AT3G49160					AT2G04550	AT2G24650			AT1G59990
AT3G16460	AT4G08540	AT3G61190	AT4G17245	AT3G28910	AT3G62010	AT3G45060	AT3G49340					AT2G04650	AT2G24830			AT1G60070
AT3G17860	AT4G08860	AT3G61390	AT4G17470	AT3G29130	AT3G62455	AT3G45140	AT3G49880					AT2G05160	AT2G25200			AT1G60140
AT3G18030	AT4G09000	AT3G61470	AT4G17640	AT3G29240	AT3G62770	AT3G45780	AT3G50010					AT2G05210	AT2G25300			AT1G60730
AT3G18140	AT4G09140	AT3G61960	AT4G17660	AT3G29370	AT3G63000	AT3G46320	AT3G50060					AT2G05260	AT2G25450			AT1G60780
AT3G18170	AT4G09560	AT3G62010	AT4G19390	AT3G30775	AT3G63210	AT3G46370	AT3G50070					AT2G05630	AT2G25470			AT1G60940
AT3G18770	AT4G10000	AT3G62090	AT4G21510	AT3G42050	AT3G63240	AT3G46590	AT3G50270					AT2G05710	AT2G25737			AT1G60970
AT3G19580	AT4G11150	AT3G62630	AT4G21880	AT3G42806	AT3G63290	AT3G46600	AT3G50760					AT2G05765	AT2G25900			AT1G61000
AT3G19640	AT4G12080	AT3G62920	AT4G21930	AT3G43850	AT4G00440	AT3G46880	AT3G50850					AT2G06520	AT2G26030			AT1G61030
AT3G19660	AT4G12470	AT3G63210	AT4G22310	AT3G44200	AT4G00750	AT3G47350	AT3G51040					AT2G06530	AT2G26260			AT1G61120
AT3G19990	AT4G13250	AT3G63250	AT4G22360	AT3G45140	AT4G01020	AT3G47380	AT3G51110					AT2G07727	AT2G26310			AT1G61160
AT3G20390	AT4G13830	AT3G63290	AT4G23680	AT3G45780	AT4G01026	AT3G47470	AT3G52030					AT2G07811	AT2G26710			AT1G61240
AT3G21351	AT4G14880	AT3G63440	AT4G23730	AT3G45860	AT4G01850	AT3G48590	AT3G52060					AT2G14080	AT2G26990			AT1G61260
AT3G22110	AT4G14905	AT4G00420	AT4G24020	AT3G45960	AT4G02120	AT3G48600	AT3G52860					AT2G14610	AT2G27030			AT1G61520
AT3G22160	AT4G15140	AT4G01026	AT4G24275	AT3G46090	AT4G02390	AT3G49120	AT3G53340					AT2G14620	AT2G27050			AT1G61610
AT3G22230	AT4G15210	AT4G01130	AT4G24390	AT3G46320	AT4G02500	AT3G49160	AT3G53570					AT2G14835	AT2G27285			AT1G61780
AT3G22260	AT4G16060	AT4G02500	AT4G24450	AT3G46370	AT4G02540	AT3G49530	AT3G53650					AT2G15760	AT2G27460			AT1G62040
AT3G22910	AT4G16444	AT4G02970	AT4G25000	AT3G46590	AT4G03115	AT3G49550	AT3G53960					AT2G16090	AT2G27510			AT1G62330
AT3G22942	AT4G16710	AT4G03600	AT4G25650	AT3G46600	AT4G03140	AT3G49620	AT3G54750					AT2G17040	AT2G27830			AT1G62430
AT3G23030	AT4G17640	AT4G04330	AT4G25660	AT3G46880	AT4G03510	AT3G50110	AT3G54826					AT2G17450	AT2G28710			AT1G62810
AT3G23080	AT4G17660	AT4G04409	AT4G26200	AT3G46970	AT4G04409	AT3G50270	AT3G55240					AT2G17560	AT2G28760			AT1G62820
AT3G23110	AT4G18360	AT4G04620	AT4G26640	AT3G47350	AT4G04970	AT3G50430	AT3G55440					AT2G17740	AT2G28960			AT1G62880
AT3G23170	AT4G18440	AT4G04745	AT4G27410	AT3G47380	AT4G08330	AT3G50520	AT3G55480					AT2G17780	AT2G29410			AT1G63000
AT3G23240	AT4G18990	AT4G04780	AT4G27710	AT3G47470	AT4G08350	AT3G51310	AT3G55740					AT2G17880	AT2G29490			AT1G63090
AT3G23250	AT4G20460	AT4G05030	AT4G27760	AT3G47540	AT4G08540	AT3G51450	AT3G56470					AT2G18010	AT2G29670			AT1G63220
AT3G24350	AT4G20960	AT4G08290	AT4G28260	AT3G47560	AT4G08690	AT3G51830	AT3G56580					AT2G18020	AT2G30105			AT1G63690
AT3G24830	AT4G21930	AT4G08920	AT4G29230	AT3G47590	AT4G08900	AT3G51915	AT3G57100					AT2G18030	AT2G30110			AT1G63720
AT3G25510	AT4G22310	AT4G09560	AT4G29310	AT3G47930	AT4G08920	AT3G52070	AT3G57580					AT2G18040	AT2G30580			AT1G63750
AT3G25600	AT4G22360	AT4G09760	AT4G29700	AT3G48590	AT4G08950	AT3G52190	AT3G57750					AT2G18280	AT2G30710			AT1G63860
AT3G25717	AT4G23730	AT4G09800	AT4G29890	AT3G48600	AT4G09000	AT3G52300	AT3G57760					AT2G18290	AT2G30740			AT1G63900
AT3G25760	AT4G24060	AT4G10050	AT4G30510	AT3G48820	AT4G09320	AT3G52630	AT3G58170					AT2G18300	AT2G30920			AT1G64190
AT3G25780	AT4G24450	AT4G10140	AT4G30790	AT3G49160	AT4G09560	AT3G53370	AT3G58380					AT2G18650	AT2G30990			AT1G64200
AT3G26170	AT4G24990	AT4G10330	AT4G31398	AT3G49320	AT4G09760	AT3G53650	AT3G59080					AT2G18700	AT2G31090			AT1G64460
AT3G26440	AT4G25200	AT4G10340	AT4G31410	AT3G49530	AT4G11230	AT3G54030	AT3G59300					AT2G18750	AT2G31130			AT1G64470
AT3G26470	AT4G25660	AT4G10695	AT4G31970	AT3G49550	AT4G11360	AT3G54160	AT3G59940					AT2G18770	AT2G31510			AT1G64572
AT3G26690	AT4G26130	AT4G10920	AT4G32130	AT3G49790	AT4G12570	AT3G54880	AT3G59950					AT2G19250	AT2G31751			AT1G64750
AT3G26840	AT4G26288	AT4G10940	AT4G32480	AT3G50110	AT4G14230	AT3G55440	AT3G60200					AT2G19600	AT2G32020			AT1G65000
AT3G27000	AT4G26555	AT4G11280	AT4G32960	AT3G50280	AT4G14340	AT3G55560	AT3G60340					AT2G19740	AT2G32080			AT1G65250
AT3G27230	AT4G26640	AT4G11460	AT4G34660	AT3G50520	AT4G14500	AT3G56460	AT3G60410					AT2G19810	AT2G32150			AT1G65390
AT3G27280	AT4G27040	AT4G12650	AT4G34840	AT3G50800	AT4G14520	AT3G56880	AT3G61350					AT2G20060	AT2G32400			AT1G65410
AT3G27310	AT4G27410	AT4G12735	AT4G35440	AT3G51010	AT4G14570	AT3G56950	AT3G62010					AT2G20260	AT2G32487			AT1G65500
AT3G27500	AT4G27480	AT4G13250	AT4G35880	AT3G51310	AT4G14880	AT3G57030	AT3G62070					AT2G20360	AT2G32530			AT1G65610
AT3G27880	AT4G27710	AT4G13395	AT4G36032	AT3G51830	AT4G14905	AT3G57650	AT3G62080					AT2G20390	AT2G32580			AT1G65690
AT3G27970	AT4G27760	AT4G14500	AT4G37690	AT3G52070	AT4G14930	AT3G57760	AT3G62220					AT2G20850	AT2G32660			AT1G65730
AT3G27997	AT4G28350	AT4G14880	AT4G37990	AT3G52630	AT4G14990	AT3G57790	AT3G62770					AT2G20990	AT2G32910			AT1G65845
AT3G28050	AT4G28910	AT4G14930	AT4G38230	AT3G53370	AT4G15140	AT3G57890	AT3G63210					AT2G21020	AT2G32970			AT1G65850
AT3G28100	AT4G29230	AT4G14960	AT4G38390	AT3G53580	AT4G15210	AT3G58120	AT3G63290					AT2G21050	AT2G32980			AT1G65960
AT3G28340	AT4G29310	AT4G15560	AT4G38495	AT3G53650	AT4G15520	AT3G58580	AT4G00200					AT2G21160	AT2G33050			AT1G65970
AT3G28510	AT4G29700	AT4G16060	AT4G38825	AT3G53870	AT4G16060	AT3G59080	AT4G00440					AT2G21188	AT2G33390			AT1G66090
AT3G28580	AT4G30080	AT4G16444	AT4G38900	AT3G54030	AT4G17080	AT3G59900	AT4G01020					AT2G21530	AT2G33610			AT1G66160
AT3G28857	AT4G30510	AT4G16500	AT4G39925	AT3G54160	AT4G18440	AT3G59940	AT4G01026					AT2G22370	AT2G33620			AT1G66173
AT3G28890	AT4G30790	AT4G16515	AT5G01430	AT3G54880	AT4G18465	AT3G59950	AT4G01400					AT2G22475	AT2G33710			AT1G66480
AT3G28910	AT4G30935	AT4G16695	AT5G02220	AT3G54890	AT4G19865	AT3G60070	AT4G01850					AT2G22570	AT2G33835			AT1G66580
AT3G29000	AT4G31398	AT4G16892	AT5G02260	AT3G55440	AT4G20960	AT3G60340	AT4G02390					AT2G22780	AT2G34010			AT1G66900
AT3G29130	AT4G31410	AT4G17100	AT5G02580	AT3G55480	AT4G21510	AT3G60370	AT4G02500					AT2G22840	AT2G34580			AT1G66920
AT3G29170	AT4G31650	AT4G18210	AT5G03030	AT3G55560	AT4G21930	AT3G60480	AT4G02540					AT2G22880	AT2G34810			AT1G66960
AT3G29360	AT4G32440	AT4G18400	AT5G03230	AT3G56030	AT4G22310	AT3G61050	AT4G02640					AT2G23090	AT2G35110			AT1G67000
AT3G33225	AT4G32480	AT4G18440	AT5G03350	AT3G56740	AT4G23330	AT3G61060	AT4G02730					AT2G23093	AT2G35240			AT1G67050
AT3G43250	AT4G32960	AT4G18975	AT5G03360	AT3G56880	AT4G23680	AT3G61960	AT4G03115					AT2G23770	AT2G35630			AT1G67140
AT3G44620	AT4G32980	AT4G19170	AT5G03390	AT3G57030	AT4G23730	AT3G62090	AT4G04409					AT2G23820	AT2G35635			AT1G67190
AT3G44860	AT4G33940	AT4G19200	AT5G04190	AT3G57260	AT4G24060	AT3G62220	AT4G04970					AT2G23890	AT2G35738			AT1G67300
AT3G44880	AT4G34660	AT4G19865	AT5G04230	AT3G57760	AT4G24390	AT3G62450	AT4G08330					AT2G23940	AT2G36060			AT1G67325
AT3G44970	AT4G35140	AT4G19890	AT5G04490	AT3G57870	AT4G24800	AT3G62630	AT4G08350					AT2G24165	AT2G36080			AT1G67350
AT3G45060	AT4G35440	AT4G19900	AT5G05080	AT3G58120	AT4G25660	AT3G62920	AT4G08540					AT2G24300	AT2G36305			AT1G67420
AT3G45140	AT4G36032	AT4G20030	AT5G05440	AT3G58640	AT4G26160	AT3G63210	AT4G08920					AT2G24550	AT2G36320			AT1G67500
AT3G45860	AT4G36290	AT4G20140	AT5G05850	AT3G58900	AT4G26288	AT3G63250	AT4G08950					AT2G24755	AT2G36810			AT1G67820
AT3G46090	AT4G36800	AT4G20320	AT5G07000	AT3G59080	AT4G26582	AT3G63290	AT4G09000					AT2G25000	AT2G36910			AT1G67900
AT3G46280	AT4G37440	AT4G20380	AT5G07460	AT3G59540	AT4G26640	AT4G00420	AT4G09560					AT2G25180	AT2G37035			AT1G67920
AT3G46320	AT4G37690	AT4G21170	AT5G07680	AT3G59810	AT4G27060	AT4G01130	AT4G09760					AT2G25280	AT2G37120			AT1G67940
AT3G46540	AT4G37880	AT4G21200	AT5G07810	AT3G59840	AT4G27410	AT4G01200	AT4G11150					AT2G25440	AT2G37460			AT1G67950
AT3G46690	AT4G37990	AT4G21830	AT5G07890	AT3G59940	AT4G27710	AT4G01400	AT4G11360					AT2G25450	AT2G37550			AT1G67960
AT3G46970	AT4G38390	AT4G21870	AT5G08060	AT3G60370	AT4G27760	AT4G02500	AT4G11960					AT2G25737	AT2G38010			AT1G67980
AT3G47350	AT4G38825	AT4G21880	AT5G08170	AT3G60740	AT4G28240	AT4G02610	AT4G12250					AT2G25900	AT2G38170			AT1G68190
AT3G47620	AT4G38932	AT4G23530	AT5G08520	AT3G60966	AT4G28260	AT4G03190	AT4G12470					AT2G26010	AT2G38180			AT1G68200
AT3G48630	AT4G38940	AT4G23600	AT5G08580	AT3G61060	AT4G28300	AT4G03410	AT4G12650					AT2G26020	AT2G38340			AT1G68310
AT3G49120	AT4G39140	AT4G24020	AT5G08590	AT3G61180	AT4G29310	AT4G04330	AT4G14340					AT2G26030	AT2G38630			AT1G68330
AT3G49530	AT4G39660	AT4G24210	AT5G09410	AT3G61190	AT4G29480	AT4G04340	AT4G14905					AT2G26260	AT2G38710			AT1G68620
AT3G49620	AT4G39925	AT4G24370	AT5G10440	AT3G61470	AT4G29530	AT4G04370	AT4G14930					AT2G26530	AT2G38740			AT1G68680
AT3G49725	AT5G01430	AT4G24570	AT5G12020	AT3G61570	AT4G30010	AT4G04409	AT4G14990					AT2G26710	AT2G38790			AT1G68765
AT3G49940	AT5G02220	AT4G24800	AT5G12230	AT3G62010	AT4G30080	AT4G04745	AT4G15210					AT2G27050	AT2G38820			AT1G68820
AT3G50280	AT5G02260	AT4G24820	AT5G13220	AT3G62090	AT4G30510	AT4G04780	AT4G15520					AT2G27310	AT2G38840			AT1G68840
AT3G50550	AT5G02580	AT4G25870	AT5G13610	AT3G62450	AT4G30790	AT4G04955	AT4G16060					AT2G27330	AT2G38970			AT1G68920
AT3G50770	AT5G03030	AT4G26288	AT5G13960	AT3G62530	AT4G30935	AT4G04970	AT4G16920					AT2G27460	AT2G39000			AT1G69030
AT3G50800	AT5G03200	AT4G26555	AT5G14360	AT3G62630	AT4G31130	AT4G09560	AT4G17080					AT2G27660	AT2G39110			AT1G69360
AT3G50930	AT5G03230	AT4G27280	AT5G14430	AT3G63210	AT4G31398	AT4G09760	AT4G17640					AT2G27720	AT2G39360			AT1G69370
AT3G51450	AT5G03420	AT4G27690	AT5G14540	AT3G63250	AT4G31410	AT4G09800	AT4G18440					AT2G27770	AT2G39630			AT1G69390
AT3G51600	AT5G04480	AT4G27730	AT5G15940	AT3G63290	AT4G31430	AT4G10140	AT4G19865					AT2G27830	AT2G39700			AT1G69410
AT3G51915	AT5G04490	AT4G27960	AT5G15980	AT4G00026	AT4G32280	AT4G10330	AT4G20960					AT2G28160	AT2G39725			AT1G69485
AT3G52190	AT5G04760	AT4G28240	AT5G16150	AT4G00420	AT4G32440	AT4G10695	AT4G21510					AT2G28370	AT2G39750			AT1G69490
AT3G52420	AT5G05080	AT4G28630	AT5G16260	AT4G01130	AT4G32480	AT4G11280	AT4G21880					AT2G28400	AT2G39830			AT1G69510
AT3G52450	AT5G05440	AT4G28880	AT5G16480	AT4G01200	AT4G32960	AT4G11360	AT4G22310					AT2G28500	AT2G40180			AT1G69530
AT3G52560	AT5G05610	AT4G29160	AT5G16550	AT4G01320	AT4G32980	AT4G12480	AT4G23330					AT2G28755	AT2G40190			AT1G69620
AT3G52630	AT5G05850	AT4G29380	AT5G16570	AT4G01897	AT4G33210	AT4G12650	AT4G23680					AT2G29110	AT2G40340			AT1G69740
AT3G52710	AT5G07680	AT4G30280	AT5G16690	AT4G01900	AT4G33940	AT4G12735	AT4G23730					AT2G29120	AT2G40390			AT1G69780
AT3G53370	AT5G07810	AT4G30780	AT5G17390	AT4G01920	AT4G34840	AT4G12900	AT4G24020					AT2G29470	AT2G40435			AT1G69790
AT3G54030	AT5G07890	AT4G31480	AT5G17890	AT4G02330	AT4G35160	AT4G13250	AT4G24060					AT2G29670	AT2G40610			AT1G69830
AT3G54160	AT5G08060	AT4G32460	AT5G18140	AT4G03190	AT4G35440	AT4G13395	AT4G24160					AT2G29680	AT2G40730			AT1G69850
AT3G54270	AT5G08190	AT4G32530	AT5G18290	AT4G03320	AT4G35480	AT4G14070	AT4G24210					AT2G29690	AT2G40740			AT1G69900
AT3G55470	AT5G08520	AT4G32605	AT5G18630	AT4G03600	AT4G35850	AT4G14500	AT4G24390					AT2G30010	AT2G40810			AT1G69910
AT3G55560	AT5G08590	AT4G32990	AT5G18650	AT4G04180	AT4G35880	AT4G14880	AT4G24800					AT2G30050	AT2G40830			AT1G69930
AT3G55980	AT5G09620	AT4G33670	AT5G18661	AT4G04340	AT4G36032	AT4G14930	AT4G24990					AT2G30060	AT2G40840			AT1G69980
AT3G56460	AT5G09920	AT4G33780	AT5G19000	AT4G04409	AT4G37770	AT4G14960	AT4G26200					AT2G30110	AT2G40860			AT1G70150
AT3G56740	AT5G10400	AT4G34200	AT5G19010	AT4G04780	AT4G38230	AT4G15475	AT4G26640					AT2G30190	AT2G40880			AT1G70290
AT3G56880	AT5G10440	AT4G34215	AT5G19120	AT4G04970	AT4G38390	AT4G15760	AT4G27060					AT2G30410	AT2G41150			AT1G70300
AT3G56950	AT5G10745	AT4G34380	AT5G19130	AT4G05030	AT4G38495	AT4G16500	AT4G27410					AT2G30570	AT2G41160			AT1G70350
AT3G57260	AT5G10900	AT4G34760	AT5G20650	AT4G08290	AT4G38600	AT4G16515	AT4G27480					AT2G30600	AT2G41450			AT1G70490
AT3G57560	AT5G10980	AT4G35440	AT5G21070	AT4G08920	AT4G38825	AT4G17100	AT4G27710					AT2G30720	AT2G41830			AT1G70581
AT3G57650	AT5G11840	AT4G35880	AT5G21170	AT4G09000	AT4G38900	AT4G17430	AT4G27760					AT2G30920	AT2G42280			AT1G70740
AT3G57760	AT5G12230	AT4G36430	AT5G22400	AT4G09560	AT4G38940	AT4G17490	AT4G29230					AT2G31200	AT2G42640			AT1G70800
AT3G57890	AT5G13200	AT4G36720	AT5G22920	AT4G09760	AT4G39140	AT4G17510	AT4G29310					AT2G31300	AT2G42670			AT1G70940
AT3G58580	AT5G13220	AT4G37190	AT5G23240	AT4G09800	AT5G01430	AT4G18210	AT4G29530					AT2G31580	AT2G42760			AT1G71030
AT3G59080	AT5G13610	AT4G37300	AT5G23550	AT4G10000	AT5G01600	AT4G18230	AT4G29700					AT2G32010	AT2G42780			AT1G71260
AT3G59540	AT5G13960	AT4G37540	AT5G23610	AT4G10050	AT5G02220	AT4G18340	AT4G30080					AT2G32020	AT2G43050			AT1G71310
AT3G59810	AT5G14360	AT4G37550	AT5G23670	AT4G10140	AT5G02580	AT4G18890	AT4G30935					AT2G32100	AT2G43060			AT1G71410
AT3G59880	AT5G14430	AT4G38040	AT5G24160	AT4G10330	AT5G03030	AT4G18975	AT4G31130					AT2G32170	AT2G43120			AT1G71440
AT3G59900	AT5G15940	AT4G38420	AT5G24270	AT4G10340	AT5G03230	AT4G19160	AT4G31398					AT2G32190	AT2G43180			AT1G71530
AT3G59940	AT5G16260	AT4G38825	AT5G24400	AT4G10500	AT5G03240	AT4G19170	AT4G31410					AT2G32200	AT2G43330			AT1G71865
AT3G61050	AT5G16480	AT4G38900	AT5G24520	AT4G10695	AT5G03420	AT4G19810	AT4G31430					AT2G32487	AT2G43400			AT1G71880
AT3G61190	AT5G16550	AT4G39200	AT5G24800	AT4G10840	AT5G04190	AT4G19865	AT4G31950					AT2G32550	AT2G43520			AT1G71890
AT3G61200	AT5G16660	AT5G01530	AT5G24890	AT4G10920	AT5G04230	AT4G19890	AT4G32280					AT2G32560	AT2G43580			AT1G71940
AT3G61390	AT5G16690	AT5G01600	AT5G25790	AT4G11280	AT5G04290	AT4G20030	AT4G32360					AT2G32580	AT2G43620			AT1G71950
AT3G61960	AT5G17890	AT5G02490	AT5G25920	AT4G11360	AT5G04490	AT4G20140	AT4G32960					AT2G32650	AT2G43680			AT1G71970
AT3G62010	AT5G18080	AT5G02570	AT5G27710	AT4G11655	AT5G04590	AT4G20320	AT4G33650					AT2G32850	AT2G43760			AT1G72010
AT3G62220	AT5G18140	AT5G02650	AT5G27860	AT4G12230	AT5G05080	AT4G20380	AT4G33940					AT2G32970	AT2G44130			AT1G72160
AT3G62580	AT5G18290	AT5G03050	AT5G35777	AT4G12650	AT5G05310	AT4G20860	AT4G34310					AT2G33020	AT2G44210			AT1G72175
AT3G63290	AT5G18590	AT5G03230	AT5G37590	AT4G13250	AT5G05660	AT4G21170	AT4G34840					AT2G33370	AT2G44370			AT1G72220
AT3G63440	AT5G19000	AT5G03240	AT5G38480	AT4G13430	AT5G06370	AT4G21180	AT4G35140					AT2G33490	AT2G44380			AT1G72450
AT4G00420	AT5G19160	AT5G03360	AT5G38780	AT4G14230	AT5G06870	AT4G21200	AT4G35480					AT2G33580	AT2G44383			AT1G72630
AT4G00700	AT5G19300	AT5G03850	AT5G38850	AT4G14320	AT5G07810	AT4G21830	AT4G35850					AT2G34010	AT2G44740			AT1G72660
AT4G01026	AT5G19670	AT5G04480	AT5G38860	AT4G14880	AT5G07870	AT4G21870	AT4G36032					AT2G34150	AT2G44790			AT1G72690
AT4G01200	AT5G19920	AT5G04590	AT5G38880	AT4G14930	AT5G07890	AT4G21880	AT4G36050					AT2G34420	AT2G44850			AT1G72710
AT4G01897	AT5G20170	AT5G04895	AT5G39360	AT4G15010	AT5G07940	AT4G22150	AT4G36290					AT2G34430	AT2G45170			AT1G72820
AT4G02080	AT5G20900	AT5G05110	AT5G39660	AT4G15140	AT5G08060	AT4G22300	AT4G36800					AT2G34480	AT2G45260			AT1G72830
AT4G02200	AT5G22400	AT5G05140	AT5G39720	AT4G15520	AT5G08170	AT4G23530	AT4G37440					AT2G34620	AT2G45810			AT1G72840
AT4G02330	AT5G22794	AT5G05435	AT5G40460	AT4G16500	AT5G08190	AT4G23550	AT4G37610					AT2G34650	AT2G46030			AT1G72855
AT4G02410	AT5G22850	AT5G05590	AT5G40550	AT4G16890	AT5G08520	AT4G24060	AT4G37880					AT2G35070	AT2G46490			AT1G72870
AT4G02500	AT5G23000	AT5G05610	AT5G41280	AT4G17010	AT5G08590	AT4G24210	AT4G38230					AT2G35240	AT2G46505			AT1G72910
AT4G02930	AT5G23550	AT5G05620	AT5G41761	AT4G18210	AT5G08670	AT4G24275	AT4G38390					AT2G35320	AT2G46540			AT1G72920
AT4G03410	AT5G24270	AT5G05660	AT5G41880	AT4G18230	AT5G09300	AT4G24370	AT4G38495					AT2G35635	AT2G46700			AT1G72940
AT4G03600	AT5G24290	AT5G05760	AT5G41910	AT4G18340	AT5G09620	AT4G24570	AT4G38600					AT2G35780	AT2G47600			AT1G72950
AT4G04020	AT5G24670	AT5G05790	AT5G42400	AT4G18400	AT5G10400	AT4G24800	AT4G38825					AT2G35930	AT2G47700			AT1G73210
AT4G04490	AT5G24800	AT5G05950	AT5G42850	AT4G18440	AT5G10440	AT4G25440	AT4G38900					AT2G36080	AT2G47730			AT1G73720
AT4G04745	AT5G24890	AT5G06690	AT5G42860	AT4G19170	AT5G10900	AT4G26130	AT4G38940					AT2G36310	AT2G47960			AT1G73750
AT4G04780	AT5G25130	AT5G06865	AT5G43440	AT4G19180	AT5G10910	AT4G26288	AT4G39170					AT2G36370	AT2G47970			AT1G73790
AT4G04970	AT5G25190	AT5G06930	AT5G43980	AT4G19660	AT5G11840	AT4G26555	AT4G39910					AT2G36380	AT2G48030			AT1G73830
AT4G05030	AT5G25280	AT5G07590	AT5G44569	AT4G19865	AT5G12230	AT4G27070	AT4G39925					AT2G36530	AT3G01090			AT1G73920
AT4G08230	AT5G25451	AT5G07810	AT5G44570	AT4G19890	AT5G13220	AT4G27280	AT4G40080					AT2G36770	AT3G01150			AT1G74370
AT4G08290	AT5G27320	AT5G08320	AT5G44572	AT4G20030	AT5G13590	AT4G27390	AT5G01430					AT2G36780	AT3G01350			AT1G74650
AT4G08920	AT5G27710	AT5G08330	AT5G44910	AT4G20380	AT5G13610	AT4G27440	AT5G01490					AT2G36792	AT3G01360			AT1G74910
AT4G09000	AT5G27860	AT5G09300	AT5G45100	AT4G21170	AT5G13960	AT4G27450	AT5G02220					AT2G36800	AT3G01450			AT1G74930
AT4G09560	AT5G34853	AT5G09410	AT5G45440	AT4G22300	AT5G14540	AT4G27760	AT5G02260					AT2G36900	AT3G01460			AT1G74940
AT4G09760	AT5G35460	AT5G10030	AT5G45810	AT4G22540	AT5G15940	AT4G27860	AT5G03030					AT2G37130	AT3G01910			AT1G75220
AT4G09800	AT5G35790	AT5G10290	AT5G45840	AT4G23300	AT5G16150	AT4G27960	AT5G03230					AT2G37160	AT3G02170			AT1G75370
AT4G10050	AT5G35910	AT5G10570	AT5G45990	AT4G23550	AT5G16180	AT4G28070	AT5G03390					AT2G37460	AT3G02370			AT1G75420
AT4G10140	AT5G36210	AT5G11280	AT5G46210	AT4G23600	AT5G16280	AT4G28630	AT5G03420					AT2G37470	AT3G02700			AT1G75440
AT4G10330	AT5G37930	AT5G11290	AT5G47080	AT4G23650	AT5G16570	AT4G28720	AT5G04090					AT2G37620	AT3G02780			AT1G75460
AT4G10860	AT5G38480	AT5G11580	AT5G48020	AT4G24060	AT5G16690	AT4G28880	AT5G04480					AT2G37660	AT3G02800			AT1G75490
AT4G10920	AT5G38780	AT5G11890	AT5G48370	AT4G24210	AT5G18110	AT4G29740	AT5G04490					AT2G37680	AT3G03140			AT1G75500
AT4G10940	AT5G39080	AT5G12050	AT5G48720	AT4G24370	AT5G18230	AT4G29950	AT5G05080					AT2G37790	AT3G03180			AT1G75760
AT4G11280	AT5G39360	AT5G12140	AT5G49510	AT4G24490	AT5G18290	AT4G30010	AT5G05850					AT2G38170	AT3G03340			AT1G76100
AT4G11655	AT5G39720	AT5G12880	AT5G50410	AT4G24570	AT5G18590	AT4G30280	AT5G05930					AT2G38260	AT3G03773			AT1G76185
AT4G12230	AT5G40460	AT5G12950	AT5G50790	AT4G24800	AT5G18630	AT4G30690	AT5G06780					AT2G38530	AT3G03790			AT1G76260
AT4G12300	AT5G41120	AT5G13430	AT5G50950	AT4G24820	AT5G18650	AT4G30780	AT5G06870					AT2G38580	AT3G03830			AT1G76320
AT4G12470	AT5G41150	AT5G14180	AT5G51190	AT4G24970	AT5G18661	AT4G31050	AT5G07000					AT2G38710	AT3G03850			AT1G76520
AT4G12480	AT5G41330	AT5G14200	AT5G51300	AT4G25360	AT5G18800	AT4G32140	AT5G07250					AT2G38790	AT3G03890			AT1G76600
AT4G12735	AT5G41670	AT5G14210	AT5G51370	AT4G26288	AT5G19010	AT4G32280	AT5G07322					AT2G38820	AT3G03990			AT1G76640
AT4G13250	AT5G41761	AT5G14430	AT5G51840	AT4G26555	AT5G19080	AT4G32460	AT5G07680					AT2G38870	AT3G04300			AT1G76660
AT4G13360	AT5G41880	AT5G14470	AT5G53340	AT4G27090	AT5G19120	AT4G32605	AT5G07810					AT2G39380	AT3G04600			AT1G76680
AT4G13395	AT5G42400	AT5G14590	AT5G54540	AT4G27280	AT5G19130	AT4G32650	AT5G07890					AT2G39410	AT3G04605			AT1G76730
AT4G13820	AT5G42650	AT5G15160	AT5G54855	AT4G27440	AT5G19300	AT4G33670	AT5G08060					AT2G39460	AT3G04740			AT1G76790
AT4G14070	AT5G42660	AT5G15320	AT5G55450	AT4G27450	AT5G19310	AT4G33780	AT5G08190					AT2G39518	AT3G05040			AT1G76900
AT4G14370	AT5G42860	AT5G15650	AT5G56230	AT4G27690	AT5G19670	AT4G34030	AT5G08520					AT2G39650	AT3G05120			AT1G76930
AT4G14450	AT5G43280	AT5G16030	AT5G56550	AT4G27730	AT5G20620	AT4G34150	AT5G08590					AT2G39705	AT3G05170			AT1G76955
AT4G14560	AT5G43440	AT5G16050	AT5G56840	AT4G27960	AT5G20650	AT4G34200	AT5G09300					AT2G39750	AT3G05280			AT1G77000
AT4G14600	AT5G43980	AT5G16480	AT5G57660	AT4G28070	AT5G20830	AT4G34215	AT5G09630					AT2G39900	AT3G05500			AT1G77350
AT4G14880	AT5G44569	AT5G16570	AT5G58740	AT4G28400	AT5G21170	AT4G34760	AT5G09740					AT2G39910	AT3G05510			AT1G77450
AT4G14960	AT5G44580	AT5G17330	AT5G58790	AT4G28703	AT5G21940	AT4G34770	AT5G09920					AT2G39920	AT3G05545			AT1G77460
AT4G15010	AT5G45100	AT5G17610	AT5G59070	AT4G28720	AT5G22310	AT4G34790	AT5G10400					AT2G39980	AT3G05680			AT1G77480
AT4G15475	AT5G45160	AT5G18010	AT5G59160	AT4G28880	AT5G22400	AT4G35880	AT5G10440					AT2G40000	AT3G05760			AT1G77750
AT4G16150	AT5G45360	AT5G18050	AT5G59430	AT4G29480	AT5G22850	AT4G36410	AT5G10745					AT2G40190	AT3G06070			AT1G77765
AT4G16260	AT5G45440	AT5G18080	AT5G60190	AT4G29740	AT5G22920	AT4G36430	AT5G10910					AT2G40205	AT3G06080			AT1G77920
AT4G16515	AT5G45650	AT5G18800	AT5G60200	AT4G29950	AT5G23320	AT4G36630	AT5G10980					AT2G40270	AT3G06370			AT1G78300
AT4G16860	AT5G45840	AT5G18930	AT5G60370	AT4G30410	AT5G23610	AT4G37190	AT5G11800					AT2G40640	AT3G06400			AT1G78370
AT4G17100	AT5G45990	AT5G19070	AT5G60680	AT4G30845	AT5G24270	AT4G37290	AT5G11840					AT2G40860	AT3G06420			AT1G78380
AT4G18210	AT5G46210	AT5G19120	AT5G61440	AT4G31060	AT5G24520	AT4G37540	AT5G12230					AT2G40970	AT3G06470			AT1G78570
AT4G18440	AT5G47240	AT5G19440	AT5G61550	AT4G31480	AT5G24670	AT4G37770	AT5G13220					AT2G41110	AT3G06780			AT1G78600
AT4G18890	AT5G47370	AT5G20830	AT5G62270	AT4G32060	AT5G24890	AT4G38040	AT5G13390					AT2G41380	AT3G07100			AT1G78660
AT4G18930	AT5G48720	AT5G20885	AT5G62760	AT4G32280	AT5G25190	AT4G38420	AT5G14360					AT2G41410	AT3G07280			AT1G78670
AT4G18975	AT5G49510	AT5G20900	AT5G62950	AT4G32460	AT5G25920	AT4G38470	AT5G14430					AT2G41510	AT3G07350			AT1G78830
AT4G19170	AT5G49945	AT5G21070	AT5G63020	AT4G32605	AT5G26700	AT4G38850	AT5G14540					AT2G41705	AT3G07480			AT1G78850
AT4G19200	AT5G50790	AT5G21940	AT5G63180	AT4G32990	AT5G27320	AT4G39200	AT5G15940					AT2G42210	AT3G07640			AT1G78890
AT4G19810	AT5G50950	AT5G22390	AT5G63280	AT4G33100	AT5G27470	AT4G39220	AT5G15980					AT2G42230	AT3G07790			AT1G78900
AT4G19865	AT5G50970	AT5G22580	AT5G63470	AT4G34150	AT5G27650	AT4G39660	AT5G16150					AT2G42310	AT3G07800			AT1G78910
AT4G20030	AT5G51160	AT5G22790	AT5G63480	AT4G34200	AT5G27710	AT5G01600	AT5G16180					AT2G42320	AT3G07930			AT1G79010
AT4G20320	AT5G51300	AT5G22920	AT5G63830	AT4G34215	AT5G35777	AT5G02010	AT5G16210					AT2G42360	AT3G07940			AT1G79040
AT4G20380	AT5G51370	AT5G23010	AT5G64160	AT4G34380	AT5G37590	AT5G02570	AT5G16320					AT2G42480	AT3G08590			AT1G79440
AT4G20860	AT5G52545	AT5G23020	AT5G64910	AT4G34450	AT5G37930	AT5G02650	AT5G16480					AT2G42490	AT3G08860			AT1G79450
AT4G21580	AT5G53340	AT5G23130	AT5G65207	AT4G34760	AT5G38470	AT5G03230	AT5G16550					AT2G42590	AT3G08890			AT1G79530
AT4G21870	AT5G53350	AT5G23200	AT5G65660	AT4G34770	AT5G38850	AT5G04190	AT5G16570					AT2G42600	AT3G09320			AT1G79590
AT4G21880	AT5G54430	AT5G23240	AT5G65760	AT4G34790	AT5G39250	AT5G04360	AT5G16690					AT2G42610	AT3G09390			AT1G79610
AT4G22300	AT5G54540	AT5G23535	AT5G66380	AT4G35440	AT5G39360	AT5G04510	AT5G17250					AT2G42640	AT3G09900			AT1G79870
AT4G22756	AT5G54730	AT5G24490	AT5G66480	AT4G35850	AT5G39660	AT5G04740	AT5G17890					AT2G42680	AT3G10020			AT1G79940
AT4G23140	AT5G54855	AT5G24620	AT5G66490	AT4G36290	AT5G39720	AT5G05435	AT5G18230					AT2G42700	AT3G10030			AT1G79990
AT4G23215	AT5G55600	AT5G25190	AT5G67520	AT4G37290	AT5G40460	AT5G05590	AT5G18290					AT2G42960	AT3G10130			AT1G80110
AT4G23320	AT5G55850	AT5G26940	ATCG00570	AT4G37300	AT5G41100	AT5G05610	AT5G18630					AT2G42980	AT3G10260			AT1G80310
AT4G23550	AT5G55896	AT5G27520		AT4G37530	AT5G41110	AT5G05620	AT5G18800					AT2G43070	AT3G10310			AT1G80320
AT4G23600	AT5G55940	AT5G27850		AT4G38420	AT5G41150	AT5G05760	AT5G18840					AT2G43150	AT3G10390			AT1G80400
AT4G24020	AT5G56520	AT5G35730		AT4G38850	AT5G41880	AT5G05790	AT5G19000					AT2G43400	AT3G10440			AT1G80440
AT4G24210	AT5G56840	AT5G35790		AT4G38900	AT5G41910	AT5G05850	AT5G19010					AT2G43570	AT3G10480			AT1G80450
AT4G24370	AT5G57150	AT5G36970		AT4G39220	AT5G42860	AT5G05930	AT5G19080					AT2G43620	AT3G10490			AT1G80600
AT4G25440	AT5G57330	AT5G37420		AT4G39370	AT5G43280	AT5G06420	AT5G19160					AT2G43640	AT3G10550			AT1G80650
AT4G25900	AT5G57500	AT5G38110		AT5G01530	AT5G43400	AT5G06865	AT5G19200					AT2G43760	AT3G10660			AT1G80670
AT4G26582	AT5G57660	AT5G39080		AT5G01600	AT5G43980	AT5G06930	AT5G19310					AT2G43820	AT3G10730			AT1G80720
AT4G26940	AT5G58590	AT5G39320		AT5G01620	AT5G44260	AT5G07010	AT5G19530					AT2G43870	AT3G11100			AT1G80830
AT4G27070	AT5G58640	AT5G39800		AT5G02010	AT5G44569	AT5G07590	AT5G19670					AT2G44060	AT3G11280			AT1G80840
AT4G27220	AT5G58740	AT5G40650		AT5G02570	AT5G44910	AT5G07790	AT5G20650					AT2G44210	AT3G11590			AT1G80850
AT4G27280	AT5G58790	AT5G40870		AT5G02650	AT5G45100	AT5G07810	AT5G21940					AT2G44350	AT3G11650			AT1G80860
AT4G27690	AT5G59160	AT5G40920		AT5G02760	AT5G45650	AT5G08320	AT5G22310					AT2G44380	AT3G11780			AT1G80900
AT4G27730	AT5G59430	AT5G41590		AT5G03230	AT5G45810	AT5G08330	AT5G22400					AT2G44383	AT3G11890			AT1G80950
AT4G27860	AT5G59840	AT5G41670		AT5G03345	AT5G45840	AT5G08410	AT5G22850					AT2G44500	AT3G11930			AT2G01020
AT4G27960	AT5G60190	AT5G41910		AT5G03360	AT5G46210	AT5G08565	AT5G23090					AT2G44520	AT3G11960			AT2G01100
AT4G28070	AT5G60200	AT5G42320		AT5G03470	AT5G47080	AT5G09300	AT5G23550					AT2G44610	AT3G12200			AT2G01140
AT4G28390	AT5G60370	AT5G42840		AT5G04190	AT5G47370	AT5G09630	AT5G23670					AT2G44740	AT3G12300			AT2G01420
AT4G28400	AT5G60680	AT5G42860		AT5G04360	AT5G48570	AT5G10030	AT5G24160					AT2G45240	AT3G12380			AT2G01460
AT4G28980	AT5G60730	AT5G43600		AT5G04480	AT5G48720	AT5G10400	AT5G24270					AT2G45600	AT3G12600			AT2G01490
AT4G29160	AT5G60870	AT5G43710		AT5G04510	AT5G48780	AT5G10570	AT5G24520					AT2G45810	AT3G12650			AT2G01930
AT4G29380	AT5G61440	AT5G44005		AT5G04590	AT5G48810	AT5G10710	AT5G24670					AT2G46150	AT3G12680			AT2G02050
AT4G29560	AT5G61490	AT5G44210		AT5G04895	AT5G50410	AT5G10745	AT5G24890					AT2G46170	AT3G13030			AT2G02180
AT4G30010	AT5G61640	AT5G44720		AT5G05010	AT5G50790	AT5G11140	AT5G25190					AT2G46180	AT3G13290			AT2G02450
AT4G30280	AT5G62950	AT5G45340		AT5G05230	AT5G50850	AT5G11280	AT5G25280					AT2G46400	AT3G13410			AT2G02480
AT4G30360	AT5G63280	AT5G45650		AT5G05620	AT5G50950	AT5G11290	AT5G27320					AT2G46540	AT3G13550			AT2G02540
AT4G30480	AT5G63470	AT5G47040		AT5G05660	AT5G50970	AT5G11520	AT5G27470					AT2G46550	AT3G13560			AT2G02590
AT4G30780	AT5G63480	AT5G47240		AT5G05780	AT5G51370	AT5G11580	AT5G27650					AT2G46600	AT3G13772			AT2G02710
AT4G30845	AT5G63830	AT5G47370		AT5G05790	AT5G52545	AT5G11600	AT5G27710					AT2G46650	AT3G13850			AT2G02760
AT4G30850	AT5G63870	AT5G47900		AT5G05950	AT5G53150	AT5G11890	AT5G35777					AT2G47190	AT3G14067			AT2G03220
AT4G31510	AT5G64160	AT5G47940		AT5G06420	AT5G53340	AT5G12140	AT5G35910					AT2G47210	AT3G14750			AT2G03310
AT4G32460	AT5G64260	AT5G47960		AT5G06865	AT5G54540	AT5G12880	AT5G38470					AT2G47390	AT3G15020			AT2G03330
AT4G32605	AT5G64470	AT5G48370		AT5G06930	AT5G54730	AT5G13420	AT5G38480					AT2G47600	AT3G15290			AT2G03440
AT4G32650	AT5G64600	AT5G48430		AT5G07590	AT5G54855	AT5G13430	AT5G38780					AT2G47730	AT3G15358			AT2G03590
AT4G32930	AT5G64910	AT5G49525		AT5G07790	AT5G55896	AT5G13550	AT5G38860					AT3G01090	AT3G15450			AT2G03620
AT4G32990	AT5G65207	AT5G49555		AT5G07810	AT5G55940	AT5G14180	AT5G38880					AT3G01170	AT3G15540			AT2G03690
AT4G33540	AT5G65260	AT5G49710		AT5G07820	AT5G56230	AT5G14200	AT5G39250					AT3G01175	AT3G15610			AT2G03890
AT4G33780	AT5G65495	AT5G49945		AT5G07860	AT5G56520	AT5G14210	AT5G39360					AT3G01360	AT3G15640			AT2G03980
AT4G34200	ATCG00570	AT5G50850		AT5G08320	AT5G56840	AT5G14260	AT5G39660					AT3G01390	AT3G15660			AT2G04530
AT4G34215		AT5G50870		AT5G08330	AT5G57340	AT5G14470	AT5G39720					AT3G01690	AT3G16630			AT2G04550
AT4G34380		AT5G51190		AT5G09900	AT5G57500	AT5G14590	AT5G39940					AT3G01830	AT3G17250			AT2G04650
AT4G35260		AT5G52390		AT5G10030	AT5G57660	AT5G14730	AT5G40550					AT3G01930	AT3G17590			AT2G05160
AT4G35440		AT5G52545		AT5G10400	AT5G57780	AT5G15160	AT5G41150					AT3G02080	AT3G17820			AT2G05210
AT4G35480		AT5G52890		AT5G10570	AT5G58030	AT5G15320	AT5G41280					AT3G02090	AT3G17850			AT2G05260
AT4G35630		AT5G53120		AT5G10760	AT5G58670	AT5G15650	AT5G41330					AT3G02150	AT3G17900			AT2G05630
AT4G36195		AT5G54190		AT5G11280	AT5G58740	AT5G15880	AT5G41590					AT3G02190	AT3G18035			AT2G05710
AT4G36290		AT5G54750		AT5G11290	AT5G58790	AT5G16030	AT5G41880					AT3G02360	AT3G18140			AT2G05765
AT4G36430		AT5G54800		AT5G11520	AT5G59140	AT5G16050	AT5G41910					AT3G02460	AT3G18215			AT2G06050
AT4G36648		AT5G54855		AT5G11580	AT5G59430	AT5G16120	AT5G42470					AT3G02550	AT3G18410			AT2G06520
AT4G37300		AT5G55190		AT5G12050	AT5G59700	AT5G16400	AT5G42650					AT3G02630	AT3G18770			AT2G06530
AT4G37530		AT5G55500		AT5G12140	AT5G60370	AT5G16480	AT5G42660					AT3G02650	AT3G18990			AT2G07671
AT4G37540		AT5G55560		AT5G12350	AT5G60680	AT5G16570	AT5G42860					AT3G02710	AT3G19390			AT2G07727
AT4G37550		AT5G56100		AT5G13260	AT5G61440	AT5G17250	AT5G43280					AT3G02800	AT3G19520			AT2G07811
AT4G37770		AT5G56320		AT5G13430	AT5G61910	AT5G17860	AT5G43670					AT3G02820	AT3G20060			AT2G13130
AT4G37900		AT5G56550		AT5G14060	AT5G62180	AT5G18010	AT5G43980					AT3G02840	AT3G20280			AT2G14080
AT4G38040		AT5G57340		AT5G14360	AT5G62270	AT5G18060	AT5G44569					AT3G03020	AT3G20290			AT2G14170
AT4G38420		AT5G57660		AT5G14430	AT5G62760	AT5G18230	AT5G44570					AT3G03100	AT3G20670			AT2G14290
AT4G38560		AT5G58005		AT5G14590	AT5G63020	AT5G18630	AT5G45160					AT3G03180	AT3G21060			AT2G14610
AT4G38900		AT5G58060		AT5G15160	AT5G63180	AT5G18650	AT5G45360					AT3G03305	AT3G21350			AT2G14620
AT4G39200		AT5G58375		AT5G15320	AT5G63280	AT5G18800	AT5G45650					AT3G03310	AT3G21351			AT2G14835
AT4G39220		AT5G58930		AT5G15580	AT5G63470	AT5G19010	AT5G45810					AT3G03590	AT3G21360			AT2G15760
AT4G39670		AT5G58960		AT5G15650	AT5G63480	AT5G19070	AT5G45840					AT3G03640	AT3G21420			AT2G16090
AT5G01100		AT5G59080		AT5G15880	AT5G63890	AT5G19120	AT5G45900					AT3G03720	AT3G21430			AT2G16660
AT5G01540		AT5G59430		AT5G16030	AT5G63970	AT5G19330	AT5G45990					AT3G03820	AT3G21781			AT2G16740
AT5G01550		AT5G59450		AT5G16050	AT5G64160	AT5G19440	AT5G46150					AT3G03850	AT3G22110			AT2G16930
AT5G01600		AT5G59580		AT5G16060	AT5G64270	AT5G19530	AT5G46210					AT3G03860	AT3G22400			AT2G17040
AT5G01732		AT5G59800		AT5G16480	AT5G64350	AT5G20830	AT5G47080					AT3G03990	AT3G22425			AT2G17450
AT5G02490		AT5G59820		AT5G16550	AT5G64780	AT5G20900	AT5G47240					AT3G04060	AT3G22430			AT2G17500
AT5G02570		AT5G59960		AT5G16570	AT5G64813	AT5G21940	AT5G47520					AT3G04070	AT3G22930			AT2G17560
AT5G02620		AT5G60190		AT5G17250	AT5G64910	AT5G22130	AT5G48560					AT3G04090	AT3G23030			AT2G17700
AT5G03240		AT5G60730		AT5G17330	AT5G65207	AT5G22400	AT5G49510					AT3G04120	AT3G23080			AT2G17740
AT5G04340		AT5G60760		AT5G18010	AT5G65260	AT5G22500	AT5G49945					AT3G04717	AT3G23110			AT2G17780
AT5G04480		AT5G61600		AT5G18050	AT5G65560	AT5G22690	AT5G50410					AT3G04890	AT3G23480			AT2G17880
AT5G04590		AT5G62575		AT5G18060	AT5G65660	AT5G22790	AT5G50970					AT3G05040	AT3G23635			AT2G18010
AT5G05140		AT5G62720		AT5G18930	AT5G66120	AT5G22920	AT5G51300					AT3G05100	AT3G24200			AT2G18020
AT5G05435		AT5G63400		AT5G19010	AT5G66380	AT5G23010	AT5G51370					AT3G05280	AT3G24315			AT2G18030
[truncated: 1,856 more rows]

## Sheet: S6
Hpa-inducible genes sowing augmented levels of Hpa-induced expression in one or more Hpa-resistant epiRILs (Group 2).
[truncated: 5,296 more rows]

[truncated: 4 more sheets: S7, S8, S9, S10]
